# Supplementary material for: Comparative Transcriptome Analysis of Genes Involved in Anthocyanin Biosynthesis in Red and Green Walnut (Juglans regia L.)
Source: MDPI journal article supplement (doi:10.3390/molecules23010025), 2017-12-22
Supplement: s1 [file s1]

**S2a Table.** Primer sequences for qRT-PCR analysis in the leaf of red and green walnut.

| Genes         | Transcripts ID                  | Forward primer       | Reverse primer       |
|---------------|---------------------------------|----------------------|----------------------|
| <i>PAL</i>    | <i>Jrgene13135</i>              | GCTTTGTTTCAGGGATGTG  | TGGTGCTTGTAGGTGGG    |
| <i>CHS</i>    | <i>Jrgene36733</i>              | TTATTCATTGGCCCGTAAGC | GGATCTTTGCTGTGGCAAGT |
| <i>F3'5'H</i> | <i>Jrgene1355</i>               | GCTCTCGGGTGTTTGTGAAT | TCACCATCCTCTCAGCCATT |
| <i>UFGT</i>   | <i>Jrgene14301</i>              | AACGAAGACCGAGCCA     | AGCCAGGAATGAAGGAAC   |
| <i>MYB</i>    | <i>Jrgene32450</i>              | GGAGAAGGAGGCGGTCATTA | GAATGATGCGCTTCCTGGAG |
| <i>bHLH</i>   | <i>Jrgene32411</i>              | CAACAAGCAGCTCAGAAAGC | GTAGCTTGGCCTCTTTTTC  |
| <i>WD40</i>   | <i>Jrgene7876</i>               | CTTGCCAGCACTCCAACATT | CCAGCCAAGAAAGAACCACC |
|               | <i><math>\beta</math>-ACTIN</i> | GCCGAACGGGAAATTGTC   | AGAGATGGCTGGAAGAGG   |

**S2b Table.** Primer sequences for qRT-PCR analysis in the peel of red and green walnut.

| Genes          | Transcripts ID     | Forward primer       | Reverse primer        |
|----------------|--------------------|----------------------|-----------------------|
| <i>PAL</i>     | <i>Jrgene13135</i> | GCTTTGTTTCAGGGATGTG  | GGGTGGATGTTTCGTGGT    |
| <i>CHS</i>     | <i>Jrgene4994</i>  | ACCCCGATACAAGCGTTGA  | AACACCAAATGGGGTGAAAG  |
| <i>F3'5'H</i>  | <i>Jrgene30190</i> | AGCAATTGATTGGGCACTCT | TCATGAGGAAGCAAAAAGTGG |
| <i>F3H</i>     | <i>Jrgene39130</i> | CCTTGGTGATCAAATGCAGA | AGCAATCCACAGGTCCAATC  |
| <i>UFGT</i>    | <i>Jrgene39777</i> | AATACTGCCTGTTGGTCC   | TCTTGAGGGCTGTTGC      |
| <i>MYB</i>     | <i>Jrgene32450</i> | GGAGAAGGAGGCGGTCATTA | GAATGATGCGCTTCCTGGAG  |
| <i>bHLH</i>    | <i>Jrgene32411</i> | CAACAAGCAGCTCAGAAAGC | GTAGCTTGGCCTCTTTTTCG  |
| <i>WD40</i>    | <i>Jrgene7876</i>  | CTTGCCAGCACTCCAACATT | CCAGCCAAGAAAGAACCACC  |
| <i>β-ACTIN</i> |                    | GCCGAACGGGAAATTGTC   | AGAGATGGCTGGAAGAGG    |
