# Supplementary material for: Comparative Transcriptome Analysis of Genes Involved in Anthocyanin Biosynthesis in Red and Green Walnut (Juglans regia L.)
Source: MDPI journal article supplement (doi:10.3390/molecules23010025), 2017-12-22
Supplement: s1 [file s1]

**S2Table.** Summary of annotations for the assembled walnut in the public databases.

| DEG Set  | Total<br>DEGs | COG   | GO     | KEGG  | NR    | Swiss-Prot | eggNOG |
|----------|---------------|-------|--------|-------|-------|------------|--------|
| RY vs NY | 4568          | 1,726 | 2k,902 | 1,384 | 4,541 | 3,578      | 4,471  |
| RP vs NP | 3038          | 1,152 | 1,939  | 1,008 | 3,014 | 2,368      | 2,969  |
