# Supplementary material for: Comparative Transcriptome Analysis of Genes Involved in Anthocyanin Biosynthesis in Red and Green Walnut (Juglans regia L.)
Source: MDPI journal article supplement (doi:10.3390/molecules23010025), 2017-12-22
Supplement: s1 [file s1]

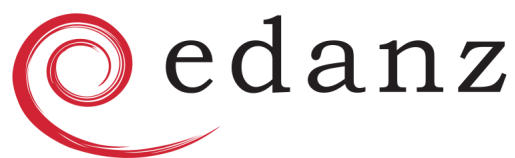

## Certificate of English Editing

Date of Issue

18 December 2017

### About the manuscript:

Title

Comparative Transcriptome Analysis of Genes Involved in Anthocyanin Biosynthesis in Red and Green Walnut (*Juglans regia* L.)

First Author

Yongzhou Li

Affiliation

College of Horticultural Science, Henan Agricultural University, Zhengzhou 450002, China

Date of editing

6 December 2017

### About the editor:

Editor

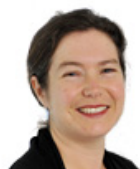

**Jennifer Smith**

1999 - PhD Botany - University of Otago

*Experienced editor, and peer reviewer for Functional Plant Biology and Enzyme and Microbial Technology*

[Full profile](#)

Certificate issued by

Benjamin Shaw  
Director

Liwen Bianji (Edanz Group China)

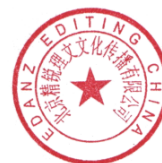

While this certificate confirms the authors have used Edanz's editing services, we cannot guarantee that additional changes have not been made after our edits.

Liwen Bianji (Edanz Group China)  
Interchina Commercial Building, 1112A  
No 33. Dengshikou Street, Dongcheng District, Beijing, P.C. 100006, China  
Phone +86-10-6528-0877 Fax +86-10-6528-0834 Email [editing@liwenbianji.cn](mailto:editing@liwenbianji.cn)
