# Supplementary material for: Comparative Transcriptome Analysis of Genes Involved in Anthocyanin Biosynthesis in Red and Green Walnut (Juglans regia L.)
Source: Molecules. 2017 Dec 22;23(1):25. doi: 10.3390/molecules23010025 (PMC5943948; doi:10.3390/molecules23010025)
Supplement: Supplementary file 1 [file molecules-23-00025-s001.zip]

Archive with 8 entries (8 files):
- Certificate of English Editing.pdf
- S1 Table. The summary of the up and down-regulated genes in the leaf and peel of red and green walnut.xls
- S2 Table. Summary of annotations for the assembled walnut in the public databases..pdf
- S3 Table. Differentially expressed genes (DEGs) and their Nr annotations in each comparative group..xls
- S4 Table. Summary of the GO enrichment analysis of the DEGs in each comparison..xls
- S5 Table. KEGG pathways and the corresponding gene numbers and IDs in the transcriptome of red and green walnut..xls
- S6 Table. Primer sequences for qRT-PCR analysis..pdf
- supplemental figure.pdf
