# Supplementary material for: Comparative Transcriptome Analysis of Genes Involved in Anthocyanin Biosynthesis in Red and Green Walnut (Juglans regia L.)
Source: Molecules. 2017 Dec 22;23(1):25. doi: 10.3390/molecules23010025 (PMC5943948; doi:10.3390/molecules23010025)
Supplement: Supplementary file 1 [file molecules-23-00025-s001.zip › S1 Table. The summary of the up and down-regulated genes in the leaf and peel of red and green walnut.xls]

## Sheet: RYvsNY
The summary of the up and down-regulated in the LEAF of red and green walnut
Gene ID	NY-1_FPKM	NY-2_FPKM	NY-3_FPKM	RY-1_FPKM	RY-2_FPKM	RY-3_FPKM	regulated
gene34638	2.63288	1.94721	1.96376	17.6796	15.5258	14.4976	up
gene33563	0.809496	0.63367	0.563941	0.054236	0.0875221	0	down
gene16804	16.9979	17.6392	17.3132	1.15088	0	0	down
gene888	1.53939	2.89999	3.42183	0	0	0	down
gene15535	4.8205	3.55144	4.1448	0.960921	0.923084	0.950264	down
Walnut_newGene_1610	1.21345	0.835659	1.2318	5.46079	6.57334	6.59832	up
gene13881	1.95424	1.2019	1.56049	0.301021	0.386527	0.329606	down
gene10772	4.71075	10.4551	9.32175	0.31425	0.289052	0.368601	down
gene35026	1.7779	0.786715	0.687709	0	0	0	down
gene23311	113.117	97.9886	94.0423	803.428	760.882	814.062	up
gene35294	11.7053	7.95559	5.68306	1.18251	1.0802	0.94402	down
Walnut_newGene_2393	0	0	0	10.3927	9.73107	8.86717	up
gene21521	1.04666	0.564087	0.434125	11.8076	13.8972	13.9305	up
gene32759	3.36371	2.03004	1.63493	0.0970528	0.231531	0.156942	down
gene12452	1.25182	0.873834	0.75142	0.106413	0.133638	0.0379626	down
gene7458	2.08714	1.87304	1.72619	0.220494	0.0420933	0.225075	down
gene17727	90.0624	89.5242	90.9963	0	0	0	down
gene29936	10.4803	12.7122	15.7268	98.628	83.1931	90.1091	up
gene13345	7.98769	4.72117	3.45618	1.01459	1.01231	1.13926	down
gene27065	17.2632	20.0792	20.847	147.161	142.652	162.601	up
gene12199	1.77524	2.78553	2.88935	0.419213	0.634408	0.401434	down
gene978	1.78166	5.53875	7.04898	69.2458	55.7876	59.8045	up
gene23143	1.79268	3.30732	2.85023	0	0	0.041242	down
gene28159	3.87286	3.61151	3.32546	0	0.0309969	0	down
gene10507	2.24079	3.23136	3.3053	0	0.0339438	0.152349	down
gene34983	35.8825	53.1075	56.5256	212.322	209.569	213.411	up
gene35555	0.0439635	0.123277	0.186324	1.56767	2.69093	1.64049	up
gene7013	13.5139	15.9385	15.2435	72.1328	71.8008	71.7196	up
gene40195	0	0	0	1.27518	1.72943	1.92411	up
gene36659	1.73949	0.974586	0.838513	0.0751857	0.259576	0.210315	down
gene30725	3.19133	2.14129	3.56283	16.4499	16.3295	17.4614	up
gene14809	0	0	0	0.873114	0.996288	0.934849	up
gene32385	2.39239	2.65613	1.93261	0	0.0688598	0.0824472	down
gene35191	3.9942	23.4628	24.4618	80.951	88.7497	103.054	up
Walnut_newGene_3973	1.99027	1.8677	1.86933	9.05184	7.68981	8.91403	up
gene17432	23.9004	18.0515	21.692	120.292	114.213	122.922	up
Walnut_newGene_6972	0.654604	1.18583	0.94586	5.03812	4.13078	4.75357	up
gene39672	1.85125	1.39132	1.00587	10.5726	11.8283	10.5267	up
gene4793	0.584499	0.353054	0.443504	6.99396	7.013	7.24969	up
Walnut_newGene_5891	12.979	10.9865	12.0562	0	0	0	down
gene8597	688.316	561.092	563.576	18.8093	27.1271	24.7475	down
gene40364	10.761	7.96205	6.5078	0.348767	0.615422	0.694916	down
gene39367	1.84584	1.8101	1.48756	16.6719	15.3838	14.9295	up
gene21208	12.3582	5.97178	4.95937	0.185617	0.259642	0.206469	down
gene11030	47.5765	47.023	52.0678	204.084	261.021	288.327	up
gene39966	0.173518	0.419151	0.0549498	4.10376	4.72753	4.92329	up
gene43283	2.02368	3.40603	2.61225	42.6604	52.0311	51.9127	up
gene39382	1.52496	0.794828	0.838225	24.9811	26.6461	25.8993	up
gene13664	17.8751	22.5372	22.3326	1.74777	2.9306	1.92795	down
gene23664	0.121676	0	0	20.7522	22.6917	23.9554	up
gene4587	4.22991	1.79182	1.09122	0	0.0298958	0	down
gene446	10.1741	9.67571	9.46389	1.52256	1.23582	0.995673	down
gene33337	1.04459	1.77675	1.73917	0.0800055	0.0549785	0.186181	down
gene22942	105.609	134.76	129.842	0	0	0.254364	down
gene31590	1.95902	3.51911	2.93102	0	0	0.0744653	down
gene4955	2.79396	2.68502	2.65474	0.381624	0.56474	0.80545	down
Walnut_newGene_7013	0.840431	1.16711	0.794987	9.7726	9.54351	9.25427	up
gene38826	19.3539	21.4649	19.1708	4.54491	4.99181	4.25287	down
gene25195	13.2966	9.00746	6.85479	0	0	0.0807052	down
gene20543	0	0	0	2.30195	2.62433	1.57235	up
gene21944	34.3757	41.4371	41.8004	0.10387	0.0497151	0	down
gene32163	10.3965	9.50454	10.0055	0	0	0	down
gene30040	2.11588	1.86346	1.53341	0.329617	0.0942598	0.272153	down
gene30063	2.04536	3.31092	3.58974	0.0622986	0.148421	0.167525	down
Walnut_newGene_3773	25.9681	15.9705	21.1627	1.26828	2.29176e-05	0.964596	down
gene30713	11.4323	12.5712	11.25	2.80489	3.18011	2.88282	down
gene32327	0.537055	1.03288	1.20057	0.120292	0.111931	0.294399	down
Walnut_newGene_4200	0.633349	0.970373	1.04472	0.117803	0.21152	0.109875	down
gene42268	0.980575	0.785132	1.0753	0	0	0.0316107	down
gene9710	3.41452	2.8356	3.41051	22.1699	14.3245	18.8176	up
gene37603	3.46827	3.09433	2.60943	0.408848	0.708009	0.533403	down
gene10700	8.71248	8.878	7.58531	1.2803	1.39743	1.34794	down
gene32062	11.8997	10.6741	11.6611	0.415091	0.522716	0.422933	down
gene40462	42.3664	53.1296	56.1595	5.25138	5.54375	4.94976	down
gene6825	1.53853	0.192757	0.312652	3.34417	4.77067	5.05655	up
gene9732	7.64494	6.84712	6.62914	1.13786	1.50476	1.1229	down
Walnut_newGene_4099	19.3508	4.23248	7.02405	0	0	0	down
gene31770	2.18091	2.91913	2.54432	0	0	0	down
gene36395	14.2723	13.973	13.2333	0	0.062131	0.138809	down
gene24643	0.78052	1.30908	0.938211	9.13091	8.606	8.73472	up
gene5018	2.2245	1.00387	1.53667	16.3709	15.9445	17.2036	up
gene20035	0.692246	0.41481	0.109023	6.50386	6.21629	7.4763	up
gene28270	2.09542	3.53493	3.10904	0	0	0	down
gene6192	6.23	7.51102	7.35824	0.448676	0.237043	0.356535	down
gene23562	22.5921	22.8686	24.6274	117.133	110.456	125.275	up
gene19241	0	0	0	6.27649	3.24678	6.04004	up
gene17385	0	0	0	3.08243	2.15707	2.73079	up
gene2607	10.7645	12.3051	10.8202	60.1853	56.7066	62.1094	up
gene23997	4.46507	5.74284	6.33195	0.914504	1.20741	1.47589	down
gene1745	18.433	15.1544	16.307	82.8475	77.5953	85.2415	up
gene23745	15.3957	24.605	24.7932	89.6928	95.9316	99.3594	up
gene15399	1.19425	4.12608	3.83963	0	0	0	down
gene41541	0.558639	0.390846	0.212507	2.53272	1.94009	1.46536	up
gene21153	1.1963	1.14333	0.960731	17.4102	19.0872	15.4834	up
gene42240	2.0082	4.22527	2.16195	0	0	0.0711695	down
gene5993	0.345405	0.350778	0.330746	0	0	0	down
gene20031	3.74596	3.61015	5.32244	0	0.0428232	0	down
gene42216	0.0309227	0	0	1.53725	1.01728	1.19006	up
gene42062	2.10473	2.07083	1.87665	0	0	0	down
gene28189	13.5635	7.85345	9.15002	79.6262	70.8013	68.0476	up
gene25247	11.4666	11.6049	12.9479	1.93189	2.35577	2.53561	down
gene11560	0.214271	0.249596	0.380354	5.58881	7.52739	7.91726	up
gene25177	11.6145	13.1164	13.9198	49.1724	60.6456	59.8585	up
gene32619	36.1325	29.5337	28.1639	7.78584	6.95349	7.74463	down
gene21102	0.803358	1.13055	1.02923	0.0918079	0.0587615	0.165685	down
gene9615	0.854522	0.546699	0.975671	6.36384	6.51986	4.54394	up
gene36678	20.516	14.7099	12.0519	1.06314	1.28314	1.11086	down
gene10002	1.51897	2.01734	1.65333	0	0.0542666	0.0614466	down
Walnut_newGene_929	1.85376	1.37749	1.31881	0.433916	0.337095	0.321057	down
gene12339	2.44895	3.08317	2.94286	0.588859	0.496625	0.373682	down
gene41837	0.482514	0.988887	1.07373	3.21173	3.66573	3.59019	up
gene23165	0.968012	0.491099	0.578206	0.00655806	0.00637114	0.00718739	down
gene20810	20.4367	8.23963	7.34511	0.57827	0.475051	0.704413	down
gene12678	0.0905075	0.0136927	0	2.48275	1.74096	0.512159	up
gene42105	50.5967	56.8654	53.1715	1.32264	1.64752	2.96887	down
gene28188	9.27808	5.79663	4.9881	47.7149	40.144	42.5201	up
gene39434	3.33031	1.58576	1.24544	0.129333	0.0819839	0.138413	down
gene35045	20.4716	26.9703	25.5364	1.43802	2.27752	2.35052	down
gene29344	3.52475	5.67976	5.16463	1.32954	0.838785	1.44272	down
gene29212	3.10676	1.94431	2.56221	0.471275	0.148108	0.0830679	down
gene31955	0.362075	0.364015	0.346807	0.0218071	0.0137111	0	down
gene7075	89.1386	117.641	120.214	0.725222	0.574523	0.908237	down
gene23578	0	0.0569985	0	0.372566	1.49121	1.20771	up
gene5276	6.7665	2.80394	2.87696	0	0	0	down
gene25150	12.0759	9.97308	9.55132	57.0893	62.175	66.9517	up
gene32198	7.74603	5.11502	3.62594	0	0	0.042199	down
gene30801	4.36023	6.78453	5.41949	0.149614	0.212993	0.279202	down
gene39125	4.54595	3.52069	3.41697	18.2367	17.164	19.9383	up
gene75	0.272468	0.386785	0.169999	2.20623	1.76588	1.86677	up
gene10015	3.22118	3.78785	3.68498	0.0878616	0	0.0477199	down
gene23663	27.4913	28.146	32.0301	149.408	157.505	152.851	up
gene22776	0	0	0	2.79493	2.75664	2.1542	up
gene14540	30.7981	42.1345	42.7362	3.85894	4.95686	5.54733	down
gene21958	2.5182	1.80345	1.893	0	0	0	down
Walnut_newGene_1698	3.70159	6.02381	4.29431	0	0	0	down
gene41459	0.631473	0.0991086	0.289385	2.79607	2.17131	2.85959	up
gene16551	7.52152	6.10726	4.74199	0.61437	0.585719	0.199633	down
gene31718	8.34611	14.2887	14.1967	2.87893	3.17962	3.04079	down
gene29381	3.08958	5.17724	6.53094	0.755218	0.870467	0.296869	down
gene5063	1.30926	1.248	0.643054	10.7079	11.3654	11.1191	up
gene1651	22.2228	30.6287	33.3086	1.66543	0.744522	1.23739	down
gene3571	2.26116	1.82426	2.28209	0.372728	0.368543	0.25935	down
gene30983	4.31687	6.38776	6.65244	167.521	137.664	148.54	up
gene27093	7.93598	11.5344	11.6216	0	0	0	down
gene36001	1.34752	1.12739	1.12308	0.109441	0.312363	0.294133	down
gene40374	2.93171	0.671983	0.927795	9.28166	12.8716	14.6093	up
gene21561	12.8316	9.02131	7.71986	1.60249	0.886796	0.585795	down
gene3233	0.73589	0.566305	0.333343	2.18222	2.03404	2.4748	up
gene6096	2.16249	1.20466	1.43253	23.8692	22.881	22.4704	up
gene6462	12.8629	13.3959	12.7161	100.351	102.183	107.732	up
gene36691	3.77064	3.1837	3.18116	0	0	0	down
gene32176	0.440605	0.254639	0.192715	2.023	1.72865	1.9649	up
Walnut_newGene_5896	3.50191	4.97139	4.28176	1.47603	1.01458	1.25665	down
gene14373	0	0	0	19.5881	20.8778	13.4175	up
gene25770	0.997438	0.308093	0.176429	10.9371	11.7297	10.8566	up
gene3494	12.6726	12.5269	11.3185	1.09271	0.87815	0.518467	down
Walnut_newGene_5063	0	0	0	1.28871	0.945077	1.04425	up
gene17843	0.59086	1.10981	1.1065	3.53615	5.6336	6.26506	up
gene7355	1.82952	1.72789	2.19335	0.408205	0.2627	0.393571	down
gene33360	204.115	341.948	338.08	9.97034	13.2808	11.1138	down
gene13910	0.198833	0.11962	0.13015	3.60428	2.55923	2.43054	up
gene3030	2.08188	1.28215	1.14265	0.311501	0.332143	0.374645	down
gene33988	6.13777	3.35965	2.7631	0.112843	0.071345	0.0397607	down
Walnut_newGene_986	1.35234	0.27826	0.608035	0	0	0	down
gene26388	10.227	10.1203	9.47597	2.3094	2.42358	2.16868	down
gene24836	0.904053	1.04047	1.02103	0.16444	0.301423	0.0967614	down
gene17215	8.41878	8.72832	9.07909	1.03464	1.01915	0.905496	down
gene12826	6.26746	2.97131	2.23892	0.161709	0.31517	0.292033	down
gene23278	0.0824772	0.15484	0.168252	15.1252	13.889	13.0059	up
gene28302	0.685238	1.09002	1.02889	0.190077	0.193385	0.248515	down
gene14396	10.5046	5.89845	5.35826	0.109314	0.281724	0.559612	down
gene27068	13.9463	13.9609	15.5311	178.397	197.064	191.295	up
gene23115	1.08879	0.555751	0.69516	0	0	0	down
gene1368	10.2041	16.7913	17.0966	1.26766	0.46769	0.27389	down
gene13818	1.20967	1.37932	1.13	0	0	0	down
gene1381	2.54561	5.25514	5.30715	0.859164	0.484538	0.460524	down
gene41894	6.39263	7.46282	8.09976	0.268211	0.390802	0.910413	down
gene42051	0.893903	0.597992	0.108247	10.5551	8.6788	9.93681	up
gene40807	10.5187	6.55479	6.39517	0.0238708	0.0449543	0.0507387	down
gene31959	510.226	824.882	779.758	1.56119	2.26698	3.36797	down
gene38973	0.0184628	0.0172423	0.1195	26.5482	26.7855	24.9786	up
gene11374	2.54659	3.40821	2.31907	0.254467	0.0755045	0.0691636	down
gene6137	103.137	76.288	75.5029	0.870922	0.77182	1.12875	down
gene33131	18.7935	20.1802	20.6942	0	0.128256	0	down
gene17343	0	0.0985712	0	34.7181	30.2267	32.1737	up
gene39324	0	0	0	1.45277	1.40112	1.92411	up
gene13943	38.7701	33.4517	35.5266	9.11957	7.98078	7.45996	down
gene40187	193.041	198.773	188.344	40.7987	35.9256	42.9705	down
gene16425	2.24509	2.30988	1.21837	0.256255	0.207149	0.375125	down
gene40933	69.2053	72.4563	72.8562	1.23903	1.78392	1.72875	down
gene32472	1.24677	1.10119	0.663566	0.229858	0.212124	0.0969049	down
gene17694	0	0	0	10.6209	10.0023	11.9464	up
gene28812	2.61154	2.96651	1.70206	0	0	0	down
gene22684	0.556944	0.338536	0.446402	2.20392	2.09382	2.45556	up
gene10095	2.86098	4.0688	3.05869	0.29901	0.488239	0.565553	down
gene42518	4.58299	3.24722	4.19425	27.4772	38.3221	36.5478	up
gene5102	18.9694	13.8588	13.187	3.09816	3.5112	2.58059	down
Walnut_newGene_7036	3.43341	3.79182	2.16034	0	0	0	down
gene26374	0.351289	0.324531	0.213664	50.2659	41.4918	42.7355	up
gene36707	11.5578	13.8678	9.76648	2.8897	3.24976	2.34261	down
gene10306	62.8591	65.8137	61.6333	11.6824	12.9982	14.8921	down
gene33583	2.72356	1.51842	1.26257	0.0612902	0.0584105	0.0653699	down
gene7722	0	0.234129	0.255638	4.55348	4.38646	3.54597	up
gene22059	3.91263	2.0495	2.05563	0	0	0	down
gene39736	8.04542	11.6236	10.0016	0	0	0	down
gene32929	1.46934	2.52503	1.54351	0	0	0	down
gene29775	2.18136	1.70008	2.16174	0.335309	0.0914565	0.155684	down
gene31272	0.0717798	0.116426	0.217749	1.0927	0.969238	1.16059	up
gene17810	3.66065	2.33503	2.38111	25.8444	25.3837	21.3726	up
gene17270	0.265697	0.310631	0.441089	1.94578	2.25255	1.55773	up
gene6698	2.27904	3.73353	4.2261	0	0	0	down
gene8040	1.52211	0.694956	0.432305	0.0141861	0.0684689	0.0155103	down
gene28875	7.0419	6.34429	5.91294	26.0827	28.2442	30.6989	up
gene851	1.41484	1.34055	1.53198	0.313422	0.202018	0.236303	down
gene1349	1.87694	1.34156	2.7648	111.658	61.9142	55.9195	up
gene5215	1.38836	0.957908	0.760295	0.276675	0.105025	0.162526	down
gene12604	0.982402	0.989188	0.9599	0	0	0	down
gene19302	3.18449	1.8925	1.96178	0	0	0	down
gene11548	4.21205	4.64344	4.13377	0.941358	0.708663	0.806453	down
gene29846	42.9489	43.5698	43.6446	3.28139	3.02204	3.52236	down
gene38381	1.36921	1.31414	0.649993	4.62135	4.66414	4.87868	up
gene31967	4.44462	3.90542	4.2329	0	0	0	down
gene14338	9.57405	11.1695	8.83856	0	0.0162191	0.0180848	down
gene29035	3.21815	2.99547	3.22836	0.275003	0.23265	0.339285	down
gene33422	37.2555	37.7731	37.5252	6.06006	7.70714	6.64232	down
gene11523	5.11442	7.46986	7.1255	1.16845	1.55627	1.45212	down
gene14825	11.0361	18.2138	20.6276	0.0795872	0.891621	0.262304	down
gene6514	10.3861	11.8704	9.76989	57.4627	63.1367	75.9286	up
gene13663	0.430484	1.3966	0.742412	0.114274	0	0	down
gene31802	0.0324287	0.060817	0	14.8077	13.0628	12.749	up
gene20792	4.88956	7.46432	7.06982	0.135157	0.440022	0.248265	down
gene40934	0.307331	0.244578	0.3575	0	0.0303775	0.0173063	down
gene4090	0.294466	0.244349	0.231202	1.18131	1.17435	1.51478	up
gene23297	5.14684	6.78469	7.14701	0	0	0	down
gene6509	0	0	0.0933524	1.16289	1.49491	2.11259	up
Walnut_newGene_566	7.99541	11.474	11.6456	0	0	0	down
gene25801	0.0196876	0	0.158928	3.39242	3.43268	3.49402	up
gene42777	6.76829	7.38772	6.17527	0	0	0	down
gene39100	408.85	570.286	619.772	0.156943	0	0.163119	down
gene183	50.8541	48.2689	50.6036	3.84932	4.62787	4.15645	down
Walnut_newGene_458	0.447356	0.713706	0.644521	2.00296e-05	1.1877e-05	0.0460885	down
gene4196	2.44173	1.80333	1.36114	0.215167	0.316966	0.382728	down
gene13661	8.41605	9.34225	10.0648	2.79075	1.45448	2.29011	down
gene37162	2.43071	1.36099	2.05983	0.199678	0.000364674	0.0832676	down
gene42043	3.69613	3.47759	3.50046	19.6699	22.092	20.5297	up
gene16725	57.6348	45.083	39.9776	12.9053	10.1887	11.6215	down
gene8830	31.6761	38.8649	38.924	4.82289	5.59524	5.81572	down
gene16120	10.7154	19.1192	21.7146	2.48913	2.47095	1.80619	down
gene28171	65.6208	67.699	73.5332	0.340654	0.481829	0.63336	down
gene30020	8.9183	8.67143	9.20816	0.984448	1.27422	1.46399	down
gene35830	0.605389	0.300976	0.432997	0.151779	0.0806111	2.50735e-06	down
gene4816	4.43149	2.46875	2.77374	0.727436	0.975389	0.331052	down
gene4696	4.20048	3.97556	3.36499	40.8489	38.6071	41.5158	up
gene29257	893.976	1219.63	1208.47	42.4995	48.8522	51.2882	down
gene11408	46.745	34.521	32.2313	196.291	232.113	207.428	up
gene30480	0.067372	0.0639311	0.343575	13.5918	10.2193	11.3177	up
gene2027	0.964897	0.798451	0.875693	10.2565	8.60041	9.65525	up
gene26402	1.97669	3.41028	4.27849	0.498051	0.307529	0.635768	down
gene34317	1.72981	2.65203	1.53933	0.314066	0.224348	0.254254	down
gene7612	1.16377	0.617024	1.33953	0.0556831	0.0524272	0	down
gene10659	9.17934	18.3311	18.4413	0.633196	0.824629	1.10683	down
gene20158	1.08481	1.21823	1.21371	0	0	0	down
gene14399	0.211557	0.314762	0.137053	0.604959	0.83511	0.973949	up
gene27116	33.752	29.2965	31.8639	6.18307	7.29363	7.25701	down
gene22264	340.258	205.703	206.856	7.70855	11.9483	8.775	down
gene24478	1.33692	1.00211	1.5546	0	0	0	down
gene36955	7.72952	6.99476	5.1576	0.110487	0.0665774	0.269526	down
gene29676	0.628968	0.168211	0.649822	20.565	23.9886	19.5782	up
gene8477	147.96	156.92	159.716	18.6143	23.3716	22.6474	down
gene17378	3.65803	4.7726	4.0364	67.5204	68.231	69.4431	up
gene27150	0.465604	0.382645	0.254298	0.0193987	0.0556989	0.0627848	down
gene26863	21.9449	13.1747	13.1792	0.47687	0.594487	0.82914	down
gene11529	12.2146	13.2082	11.5597	0.125445	0	0.266253	down
gene13017	1.26379	2.35655	2.37645	0	0.0284702	0	down
gene12621	13.1655	11.3904	25.8932	67.6788	72.0085	80.6238	up
gene27762	8.75115	4.50275	3.97904	0	0	0	down
gene987	2.5974	3.35239	3.13599	14.7357	13.5826	11.9301	up
gene36042	0.228476	0.108126	0.0580242	2.41266	3.77733	2.82137	up
Walnut_newGene_6245	5.91216	5.35971	5.9196	0.886277	1.03543	1.29063	down
gene42713	5.06464	4.33317	6.44673	0	0	0	down
gene15218	6.50473	4.92005	3.77515	0.158101	0.399372	0.343662	down
gene8646	5.90852	10.2826	8.28516	0.140324	0.796244	0.150125	down
gene12490	25.5839	18.8419	19.004	86.8364	87.2492	89.0288	up
gene24300	7.82009	7.06609	6.2985	0.308354	0.110057	0.413536	down
Walnut_newGene_5466	0	0	0	7.86689	9.14509	5.63305	up
gene3152	32.839	17.3284	17.5065	0.197116	0.109061	0.0413786	down
gene24271	3.24975	2.39015	2.68569	34.708	28.4354	27.1355	up
gene26260	16.9768	16.1596	18.2379	0	0	0	down
gene26730	0.987614	0.83028	2.13059	0	0	0	down
gene26878	490.528	361.547	357.618	1.21691	3.14001	1.94128	down
gene12077	2.43298	2.89317	2.34791	0.302845	0.577111	0.433632	down
gene25172	9.39476	5.54895	5.29708	0	0.121421	0	down
gene24073	12.0103	17.018	15.9268	135.464	127.375	130.379	up
gene38972	1.97522	2.77946	2.54755	0	0	0	down
gene13076	7.6757	5.04816	4.98447	0	0	0	down
gene4304	11.3179	13.9345	12.8233	0.123721	0.110963	0.0534258	down
gene30870	2279.4	2905.82	2971.61	0.0441636	0.0833423	0	down
gene16119	1.41589	0.930477	1.15788	11.1269	8.15345	8.00007	up
gene32437	1.01033	0.517707	0.566527	6.30298	6.36556	7.8778	up
gene11980	1.45896	1.26392	1.56411	0.0730834	0.138612	0.157605	down
gene6066	1.82918	1.33171	1.55458	0.0376974	0.104909	0	down
gene8852	8.20825	6.28186	5.68275	0	0	0	down
gene2858	1.60948	2.36692	2.5612	0	0.0645702	0.072397	down
gene32364	0.751846	0.566837	1.86481	7.25466	4.64935	5.24532	up
gene27287	0.182434	0.0421425	0.322077	2.70469	2.36969	2.18679	up
gene8183	11.4228	13.4981	13.902	3.38269	3.53281	2.87962	down
gene13567	19.2614	34.9803	31.4785	0	0	0	down
gene14655	1.6403	1.41992	1.63367	0.229249	0.108177	0.125074	down
Walnut_newGene_5103	23.0414	24.5919	28.5561	0	0	0	down
gene21805	0	0	0	15.0379	12.3677	11.3528	up
gene7876	18.1366	18.5558	17.7683	81.8921	80.1669	81.5738	up
gene3975	8.02774	6.27004	5.75613	0.179279	0.174315	0.39674	down
gene27391	3.23539	3.65288	3.89351	0.274722	0.482508	0.475189	down
gene34254	3.97124	2.54205	1.39452	0	0	0	down
gene800	12.4486	19.257	19.7604	1.67403	2.59463	3.22264	down
gene23563	0.821985	1.31656	1.66886	60.0622	45.0833	49.2591	up
gene21369	0.438515	1.70396	0.56975	9.88973	8.55091	6.39217	up
gene13372	0.699057	0.985696	0.816161	0.139278	0	0.0503554	down
gene1754	170.748	229.781	229.682	5.14689	4.91255	4.10363	down
gene21804	4.30697	3.53209	3.73027	0	0	0	down
gene41530	0.144736	0	0.0734516	14.0665	9.69606	8.09549	up
gene14663	5.292	5.07055	4.04804	0.447025	0.386896	0.435043	down
gene28466	11.1402	5.59354	4.87761	0	0	0.0569022	down
gene38910	14.0928	11.9093	11.8155	2.66375	2.54077	2.74965	down
gene41405	1.09981	0.795714	0.673507	5.61531	5.36652	5.29442	up
gene36953	0.074324	0	0.0374755	10.2726	8.96841	8.71182	up
gene40867	1.86981	2.0812	2.15423	0.0297069	0	0	down
gene39381	8.51275	9.05123	9.51431	1.01294	0.608961	0.359753	down
gene20558	0.277299	0	0	11.0071	5.65306	10.037	up
gene38994	3.63828	3.85428	3.12447	0.515245	0.613857	0.551142	down
gene20899	0	0.0273706	0	7.03998	7.39399	6.00743	up
gene3045	2.17295	2.34768	1.99061	0.252666	0.0602034	0	down
gene1297	135.449	222.73	228.792	41.0727	31.9031	32.2516	down
gene1078	4.07895	1.97246	1.80124	36.3145	34.4407	39.55	up
gene33953	13.17	24.3689	23.527	2.51517	1.83445	2.72364	down
gene21380	32.3858	23.6722	24.629	1.50806	1.46366	1.12658	down
gene7200	1.2819	1.86449	2.04236	0.174738	0.126364	0.190831	down
gene20254	1.33599	0.937399	1.35104	7.85633	7.77043	6.99999	up
gene34030	1.7541	1.10384	1.22995	0	0	0	down
gene7550	6.27034	6.39566	6.29166	0.975425	1.02897	1.47619	down
gene20311	7.98609	3.77632	3.66651	86.9964	81.0133	83.242	up
gene9938	9.34335	10.2087	8.56633	1.64823	2.28796	2.41358	down
Walnut_newGene_3344	3.4706	3.4212	4.04744	0	0	0	down
gene23896	0.466294	0.555138	0.368994	2.33837	2.47016	2.27438	up
gene21896	4.60554	3.38602	2.06949	0.205183	0.19697	0.30302	down
gene4770	31.0761	43.3128	42.1349	6.4109	5.54624	5.59592	down
gene17413	3.36116	1.73529	1.46759	10.831	9.12212	8.94374	up
gene24381	0.384745	0.42163	0.400656	0	0.0107542	0	down
gene32926	46.099	41.5407	40.4151	9.21822	8.48959	8.97661	down
gene36409	2.03875	1.31542	2.07063	0.112512	0.247684	0.0440634	down
gene17330	3.91962	4.39645	3.18335	0.695595	0.365087	0.616682	down
gene33110	2.41826	3.47066	4.17603	0	0	0	down
gene12657	3.87027	4.48158	4.16547	0.775005	0.72685	0.819265	down
gene24239	9.63841	15.8846	14.9453	0.349049	0.314434	0.250257	down
Walnut_newGene_1475	12.655	20.0071	24.0783	76.6158	92.4918	95.8108	up
gene17205	6.57462	7.66223	6.4791	0.374336	0.163822	0.339259	down
gene2202	29.0233	19.1498	17.9531	4.19105	4.31779	5.44466	down
gene8523	0	0	0	1.809	1.50379	2.12049	up
gene9917	24.6179	9.62887	7.2848	0.47781	0.541223	0.279216	down
gene39511	0	0	0	16.6447	14.8418	19.0796	up
gene23251	5.43221	6.17025	4.64373	0.221617	0	0	down
gene6449	0	0.0549585	0.0299698	1.89902	1.4067	1.52179	up
gene10027	5.5813	2.21856	3.64317	0.0767179	0	0.0834867	down
gene14031	1.76747	1.38337	1.21246	0	0.0619451	0.0710427	down
Walnut_newGene_6669	2.94478	2.42812	3.88169	0	0	0	down
Walnut_newGene_6921	0.281598	0.0257749	0.169757	1.20617	1.37802	0.641173	up
gene39567	2.75456	3.3519	1.21389	0.00135434	0.00356815	2.49264e-05	down
gene41709	0	0.0281774	0.0307983	4.88448	4.89135	6.0155	up
gene29772	11.5301	10.6222	11.0302	2.38095	2.72311	3.28063	down
Walnut_newGene_5145	0.783298	0.633573	0.664154	0	0	0	down
gene320	2.96628	1.56931	1.88574	26.6582	19.1786	17.7686	up
gene40250	1.85699	1.65251	1.60865	0.193952	0.58794	0.380122	down
gene7068	1.00561	0.846725	0.850867	0.0502609	0.0491326	0.0692369	down
gene9038	146.267	115.686	105.823	1.04237	0.985309	0.874779	down
gene27276	3.67042	5.66808	5.00325	0.110833	0	0.151618	down
gene6188	0	0	0.0295589	1.31672	0.871778	1.02263	up
Walnut_newGene_1088	12.3124	12.0152	6.97287	0	0	0	down
gene35575	8.92231	4.58333	3.43691	0.0652174	0.721187	0.346007	down
gene5044	2.10934	1.55343	1.26095	0.0263722	0	0	down
gene31299	0	0	0	1.38213	1.76955	1.79761	up
gene14073	21.8847	21.9794	22.9775	0.259439	0.324026	0.364998	down
gene31126	5.23603	3.61194	3.06554	1.13595	0.625307	0.860212	down
gene39012	1.36185	1.29865	1.52373	0.148217	0.0341069	0.194238	down
gene31393	5.22649	6.09861	5.91283	0.21272	0.446096	0.192382	down
gene31228	2.57044	3.95461	4.8294	0.50846	0.853904	0.931803	down
gene32407	0.116616	0.165243	0.0593795	4.43652	5.26183	5.35586	up
gene24625	2.35666	1.93133	1.59016	0.196627	0.143078	0.160733	down
gene18228	0.711329	0.695975	0.660687	0.0370287	0	0	down
gene17468	5.24883	6.31357	6.52819	0.968786	1.27112	1.05012	down
Walnut_newGene_1726	0	0	0	1.71359	1.41807	1.3563	up
gene32279	1.52071	1.41129	1.5095	0.142759	0.0905214	0.121407	down
gene7790	3.69388	3.63744	3.45069	17.2163	15.654	15.5536	up
gene13712	4.50397	4.55603	6.29199	0.137854	0.166638	0.426495	down
gene496	4.10552	1.88134	2.4608	0.114948	0.656795	0.124292	down
gene4279	46.7744	67.977	61.9466	0.0851219	0.0396537	0.223116	down
gene15710	0.0293176	0.0549527	0.029816	1.02228	1.02696	0.892699	up
gene23080	4.71999	10.635	7.15897	1.98749	0.821645	1.22214	down
gene33867	3.65868	7.56889	6.29791	0.0653304	0.061962	0	down
gene11962	46.3879	63.1979	61.6384	4.65815	4.47498	4.59888	down
gene23107	23.7213	27.7919	31.6976	3.66767	3.99422	3.59948	down
gene30944	11.683	11.3434	11.2785	0	0.056924	0.0640323	down
gene36394	2.22877	5.84439	5.33479	0	0	0	down
gene13927	0.663077	1.36522	1.30485	7.34308	5.75294	5.69838	up
gene38561	3.48522	5.6316	4.52204	0.531046	0.355331	0.325305	down
gene31278	5.20141	5.8135	5.77256	0.3357	0.203875	0.390179	down
gene15092	4.63289	4.14772	3.26823	0.0290674	0.23335	0.137973	down
gene119	2.35763	2.1215	1.80229	0	0	0	down
gene23019	1.26332	0.826076	1.24047	8.88628	8.9028	8.70026	up
gene42416	0.992943	0.80915	0.90918	0.035815	0.102521	0	down
gene23389	5.31552	4.90358	4.75065	0.216068	0.248529	0.515175	down
gene4420	4.08288	6.21311	5.08686	28.9977	23.7873	24.8455	up
gene42410	9.23609	7.16945	7.28735	52.8571	53.9337	54.7675	up
gene41234	5.6061	3.30765	2.81006	0.742024	0.865639	0.887456	down
gene13752	18.5021	21.8566	24.6371	0.591251	0.757583	0.950914	down
gene14987	0.455534	0.512847	0.391349	0.0646295	0.0306477	0.0687448	down
Walnut_newGene_4672	6.05797	9.27247	11.3442	2.36575	1.61475	2.11199	down
gene30947	8.25602	4.60711	4.20619	0.100389	0.24502	0.0557928	down
gene41971	3.87182	5.3804	4.83116	0	0.107704	0.0381004	down
Walnut_newGene_5605	0.501295	0.72299	0.278226	67.5653	57.0999	52.3415	up
gene28983	1.20012	0.645386	0.544727	0.0345966	0.229417	0.0924713	down
gene18060	9.72036	13.4742	9.3269	0	0.86167	1.10586	down
gene15628	5.54853	4.32109	4.17482	37.2316	36.5452	35.2179	up
gene31442	3.3914	2.52119	1.75036	0.303167	0.371334	0.273703	down
gene38250	49.1556	65.9003	70.9647	1.62222	2.65469	2.85534	down
gene27009	0.362045	0.563364	0.537431	4.01206	3.57995	3.98679	up
gene38312	0.977909	1.96298	2.16715	0	0	0	down
gene777	0.660073	0.358809	0.529179	4.12035	3.60021	4.00315	up
gene1367	0.671903	1.56249	0.850391	0.0603102	0	0	down
gene14710	59.003	46.0402	43.4604	0.084714	0.402394	0	down
gene12231	81.7979	52.5793	49.405	0.556284	0.81392	0.335302	down
gene39797	0.507572	0.675198	0.720301	2.83944	3.50814	3.72534	up
Walnut_newGene_1963	0	0	0	3.11053	4.44331	2.82617	up
gene9794	1.00627	2.33281	1.17639	0.0560677	0.106071	0.209039	down
gene7834	26.0193	38.3823	38.7769	6.95708	6.5643	7.3954	down
gene42768	3.86944	1.76428	1.97755	31.0227	29.6381	29.9289	up
gene11414	4.15396	22.5545	21.1376	0	0	0	down
gene29921	0.162051	0.258251	1.49358e-06	3.67351	2.80261	1.33075	up
gene2816	28.6417	21.9655	20.9252	115.318	122.095	110.537	up
gene8109	2.62149	4.40514	3.41203	97.8988	103.635	104.168	up
gene30698	247.338	346.92	346.454	57.0154	54.7827	58.1973	down
gene26378	1.69522	1.95612	2.12479	0	0	0	down
Walnut_newGene_5444	1.31415	1.15017	0.755062	5.62802	5.51875	3.75851	up
gene6210	29.0587	21.695	18.2467	1.09387	2.51632	1.27566	down
gene2788	4.47526	2.38903	2.29267	0.0117503	0.0113184	0.0256391	down
gene31864	10.8928	10.7141	9.34344	0.682492	0.685409	0.445054	down
gene41001	6.89714	18.4587	17.6885	0.0567083	0.164033	0.030781	down
gene17139	0.0451142	0.0426762	0.137665	0.995317	1.2623	1.96511	up
gene20213	0.399708	0.661101	0.548425	0	0	0	down
gene4360	0.246587	0.437314	0.434298	0	0.0418986	0.0471903	down
gene10816	2.97326	3.2153	3.25146	0.459219	0.658746	0.640126	down
gene37616	22.4632	20.8503	21.8909	0	0	0	down
gene22128	0	0	0	5.50765	2.42547	2.50171	up
gene1605	2.93507	3.91813	5.30857	0.390677	0.645867	1.55795	down
gene34817	3.04916	3.20856	3.758	25.959	25.1364	26.5619	up
gene29628	3.07369	2.0725	2.24775	0.219505	0.0671166	0.235149	down
Walnut_newGene_246	7.1338	2.4945	2.52118	0	0.18081	0.102043	down
gene31460	18.8945	16.801	17.4963	2.85172	2.82061	3.79155	down
gene24698	3.08906	3.07007	3.48664	0	0	0	down
gene42097	0.71188	0.1168	0.213598	3.35561	1.66293	2.33521	up
gene5967	13.2411	20.3428	20.7884	3.83791	3.61257	2.33917	down
gene29279	4.33279	3.42568	4.25304	0.140287	0.0432011	0.146526	down
gene35851	11.9374	10.0368	8.59697	2.39617	2.39541	2.92764	down
gene24234	3.41302	2.01005	1.43492	0.150682	0.415861	0.421513	down
gene14901	0.0459216	0.0859803	0.185169	8.98112	9.46509	9.61094	up
gene30535	1.21272	1.48167	1.73765	0	0	0.0529021	down
gene4652	46.9244	51.4241	54.7976	6.74089	10.6649	8.75017	down
gene5094	3.22979	3.92438	3.88169	0.841339	0.70467	0.687429	down
gene34893	0.75356	3.07094	3.74277	0	0	0	down
gene11772	4.57876	2.93746	2.9823	64.6807	64.1847	61.9744	up
gene9102	1.62122	3.12548	1.84877	214.289	191.427	194.114	up
gene26282	61.0836	41.8711	38.2261	1.63768	2.03147	1.83911	down
gene32946	26.5765	26.8763	28.1485	2.5136	1.77529	1.71063	down
gene19630	18.7272	18.3215	14.8838	0	0	0	down
gene16166	1.56685	0.743255	0.80752	10.7109	8.86881	7.64124	up
gene6629	24.3333	26.9668	24.6191	4.15019	4.28018	4.0175	down
gene4927	6.85427	6.17343	6.13967	1.30448	1.12657	1.01401	down
gene30856	2.52096	2.79977	1.80541	0.35896	0.44984	0.545439	down
gene3850	0.835425	0.375479	0.469896	12.1488	14.4018	14.6034	up
gene12089	4.39594	2.33453	1.87174	0.35521	0.204872	0.0776975	down
gene20767	0.0403223	0	0	5.41306	6.43181	5.5959	up
gene602	1.01811	2.32965	1.80787	0.150615	0.106557	0.300621	down
gene11035	0	0.133468	0.0732006	0.737488	0.737402	0.455677	up
gene3523	2.64891	0.985795	1.18762	0.246273	0.190137	0.30364	down
gene22562	3.08941	4.40282	5.40216	74.7902	99.331	99.725	up
gene15793	37.8989	22.4622	23.4025	166.959	176.174	188.5	up
gene16547	3.99384	5.62922	7.57878	0.159687	0.45734	0.386765	down
gene4274	7.76363	7.48543	7.55258	1.41456	0.785421	0.203114	down
gene11166	3.68562	2.4561	3.39168	14.7898	15.9237	15.7274	up
gene8637	8.14922	9.35275	8.57478	67.2045	64.7373	66.5165	up
gene4527	33.3559	32.9473	35.8561	0.250331	0.460029	0.0438005	down
gene5227	13.1092	12.6746	10.1422	0.0381142	0	0.0403371	down
gene22052	12.3338	16.1983	13.497	1.62676	1.80815	1.75448	down
gene20276	3.28621	5.72005	5.19697	0	0.169496	0	down
gene42699	41.5977	51.2734	51.3958	0.0852289	0.548259	0.531294	down
gene33749	24.8432	14.2787	11.7354	0.382745	0.74622	0.479626	down
gene1235	27.6386	28.5221	27.4534	4.73379	6.16384	5.38194	down
gene35831	72.0101	84.6846	84.2087	11.0476	9.04303	8.11728	down
gene25255	3.08213	2.37787	1.62075	0.306088	0.567765	0.727574	down
gene18740	0	0.22914	0.167088	1.73855	2.03148	1.52246	up
gene31682	7.11986	4.9142	4.96056	0.154313	0.0898112	0.386452	down
Walnut_newGene_4336	0	0.191823	0.209091	4.26928	2.67471	3.03043	up
gene27043	104.359	159.368	155.971	10.246	7.27228	7.38421	down
gene19156	5.19095	7.05555	8.30204	0.0656911	0	0	down
gene32346	28.4736	36.1223	31.9767	0.977311	1.80571	2.71194	down
gene3237	3.5388	3.98287	3.95043	0	0	0	down
gene36245	7.49052	8.12328	7.70478	91.1397	86.5148	91.3046	up
gene14457	1.01858	2.39097	1.08728	0.0846515	0.107686	0	down
gene33302	0.631568	0.352031	0.587991	2.74727	3.7544	3.62508	up
gene35675	34.0207	31.6994	29.2897	2.73202	2.46689	3.11866	down
gene34001	9.23065	12.4218	11.6097	0	0.141222	0	down
gene3807	3.34424	1.34945	1.11824	0	0	0	down
gene5422	0.356574	0.399692	0.239519	0	0	0	down
gene13861	1.81283	0.71553	0.403419	6.38883	7.81026	9.36242	up
gene23906	0.623726	0.363666	0.118861	3.89417	3.48459	3.22143	up
gene32332	0.247988	0.0577595	0.25301	10.2954	9.83953	11.5932	up
gene13843	3.55657	2.27009	2.66165	20.0237	15.7512	16.8772	up
gene39824	34.4158	39.1968	40.1577	238.259	234.335	261.259	up
gene38083	0.185218	0.338359	0	4.55313	6.01708	4.97922	up
gene25359	3.95018	3.7534	3.47978	0.26438	0.56002	0.519249	down
gene39976	7.69026	8.71693	8.16432	1.96945	1.75373	1.37337	down
Walnut_newGene_3557	0	0	0	11.9216	14.5911	11.4201	up
gene31241	7.30344	5.69419	4.75641	0	0.142625	0	down
gene26200	0.0659254	0	0.133386	14.9591	13.1979	15.0246	up
gene29760	135.575	162.141	156.088	3.04495	2.88583	2.90392	down
gene31245	12.6221	8.37842	8.32419	0	0.152343	0	down
gene42036	0.34506	0.662276	0.887327	0.132904	0	0.0238156	down
gene1895	3.8673	4.77464	5.53688	69.2228	48.8376	52.675	up
gene27458	2.57466	2.32299	2.18787	15.9549	11.6024	13.44	up
gene30329	470.294	1347.65	1279.8	32.3518	24.4169	25.5414	down
gene42121	0	0	0	0.551748	0.482766	0.402639	up
gene9970	60.0917	92.0069	92.836	0.0409783	0.0387448	0	down
gene33911	4.2804	8.70619	9.81287	0	0.213302	0.060669	down
gene18115	5.61996	4.13778	6.08056	28.2836	25.0302	27.0746	up
gene33499	3.22504	4.65864	3.80772	0	0.0726471	0.0274177	down
gene10965	2.26139	3.43544	2.13175	0.672148	0.4588	0.257303	down
Walnut_newGene_4293	2.09346	1.38965	1.7305	9.27858	6.86751	6.44147	up
gene2015	1.17883	0.89718	0.754038	10.5016	12.3133	11.6241	up
gene8860	0.105213	0.045628	0	6.07139	6.76581	5.85138	up
gene1410	0.0738197	0.412438	0.149798	7.55281	6.8852	6.10836	up
gene38522	1.17094	1.3503	1.22555	0.0734891	0.30606	0.229305	down
gene15845	17.8589	11.1031	11.3884	91.6848	78.3958	86.7158	up
gene26720	9.39927	9.37643	9.74654	65.8245	52.8404	57.4163	up
gene18958	9.15314	5.71284	4.03335	0	0	0	down
gene6399	1.37043	1.75182	1.23103	0.029042	0.0552728	0.124364	down
gene14282	2.3472	1.65329	2.14572	0.0437266	0.0629585	0.0475137	down
gene20714	12.1031	12.7779	12.955	0	0	0	down
gene3415	2.15916	1.4267	2.80232	0.349228	0.349534	0.247844	down
gene4994	5.26175	4.37747	4.0363	25.0925	22.1359	23.0749	up
gene33916	1.30986	2.43037	3.47322	0.0825644	0	0	down
gene5599	1.17808	1.0293	0.740348	0.124685	0.298101	0.180121	down
gene27126	45.6997	47.4307	45.7411	0	0.0650146	0	down
Walnut_newGene_5568	3.84166	3.09258	1.48182	0	0.391298	0.221925	down
Walnut_newGene_2902	1.12771	1.76774	3.57797	1.734e-05	1.21529e-05	1.9073e-05	down
gene42852	0.143867	0.135834	0.244263	3.13872	2.58235	2.26186	up
gene28108	0.0584463	0.246241	0.148731	4.88296	3.23736	3.43023	up
gene11296	0.11794	0.226073	0.613179	22.3074	24.8897	20.6412	up
gene27091	26.1296	34.973	36.3725	3.82651	4.05664	3.83346	down
gene10381	17.9173	28.0254	24.4317	155.315	131.228	132.194	up
gene20523	1.19048	1.17194	0.958255	0	0.107132	0	down
gene32845	1.75798	2.59285	2.33769	0.663643	0.347592	0.317954	down
gene39111	3.20569	2.10774	1.86226	0.511983	0.312673	0.35821	down
gene4631	0.124669	0.0439609	0.0955033	0.755693	0.627286	0.714994	up
Walnut_newGene_2855	2.39027	1.779	2.26442	0.316216	0.446999	0.641316	down
gene10003	15.8025	17.9768	18.5682	1.20969	0.80633	0.904816	down
gene17623	0	0	0	3.37593	1.76024	2.58518	up
gene33322	0.924645	0.284245	0.435206	5.20924	6.92078	5.60307	up
gene28847	1.92152	0.829789	0.850543	5.83997	7.56393	8.13131	up
Walnut_newGene_4994	120.151	141.374	131.207	0	0.450019	0	down
gene36831	5.871	9.96352	9.01119	1.001	0.913916	0.927533	down
gene35813	10.4925	11.9435	12.2604	0.94627	1.41291	1.35693	down
gene33908	3.01355	2.09723	2.69512	0.127813	0.137137	0.540451	down
gene21214	7.2741	4.08525	3.57689	0.238376	0.575663	0.287671	down
gene39005	3.13043	2.19583	2.01746	0	0.157048	0	down
gene11711	0.689123	0.613652	0.454433	0	0	0	down
gene24689	0.17322	0.189109	0.0294997	0.835019	0.729329	0.552199	up
gene36144	2.63599	1.87503	2.0533	32.2242	29.1133	28.3392	up
gene33621	1.63014	1.43058	1.31213	0	0.0406126	0	down
gene25879	1.52521	2.29871	2.11029	0.104065	0.0505656	0.028404	down
gene34222	4.56162	3.73395	2.04531	0.315824	0.510327	0.345394	down
gene2554	3.98683	1.884	1.91215	0.0744876	0	0	down
gene1924	2.73463	2.9128	3.62728	0.589753	0.230136	0.621904	down
gene32121	2.24173	2.20242	2.31491	0.253417	0.317952	0.348356	down
gene40304	5.7464	1.77734	1.38048	0	0	0	down
gene5079	0.905129	0.700422	0.511109	0.0719256	0.104442	0.152673	down
Walnut_newGene_7233	0.520759	0.790382	0.601854	0.0277024	0.027017	0.0906534	down
gene13120	1.81434	2.6325	2.83132	0.744742	0.286564	0.252567	down
gene19489	2.70084	2.05988	2.02949	0.120251	0.0553886	0.0633606	down
gene4236	8.20132	11.1331	11.8553	0.0369298	0.0699034	0	down
gene40362	0.743612	1.26313	1.11028	0	0	0	down
gene1431	3.26895	4.87023	4.45209	19.4161	16.6466	16.6019	up
gene42601	13.2137	16.1331	15.5597	2.38848	2.01945	2.29443	down
gene15658	15.5601	13.6323	16.2477	0.959437	0.574249	0.258639	down
gene5201	17.9326	16.7622	16.6839	86.048	90.6237	78.6876	up
gene1507	11.3108	15.7361	14.9211	60.6869	51.4941	55.8437	up
gene29100	8.69866	13.9837	13.287	0.752013	0.812286	0.513633	down
gene27087	0.59521	0.632237	0.603454	3.93271	4.39244	4.59979	up
Walnut_newGene_682	0.585336	0.543276	0.266193	2.12932	3.19417	2.7252	up
gene35890	21.9593	27.9276	27.735	2.57734	2.76622	3.00424	down
gene37110	22.1035	24.2794	25.1929	0.106651	0.150249	0.449713	down
gene15806	7.97028	3.2498	3.76872	0	0.319822	0.121417	down
gene15064	0.0955666	0.0882746	0	3.33144	5.19125	4.52507	up
gene39034	0.392532	0.363201	0.301702	3.07273	3.20421	4.30293	up
gene13517	0	0.0899329	0	1.56415	1.44823	1.2365	up
gene16643	11.9946	14.4092	15.1851	1.23106	1.5744	1.91018	down
gene1092	1.7539	2.24979	1.79706	9.83251	7.87519	8.27582	up
gene15638	4.62964	3.19674	3.64005	0.226383	0.0741585	0.583874	down
gene33336	3.16734	2.8439	3.48662	0.406386	0.434512	0.874501	down
gene3258	11.8888	10.2919	10.1091	0.969958	1.27358	1.54672	down
gene8599	3.35538	3.51911	4.00518	0.244052	0.219073	0.177548	down
gene6190	8.58755	8.24972	9.33658	1.26707	1.5633	1.51009	down
gene13139	1.6607	1.28547	1.19937	50.3639	46.6905	50.1265	up
gene31180	29.4635	31.1243	33.608	3.50694	2.23739	2.9228	down
gene15984	0.511962	0.716225	0.625746	0.0572387	0.145272	0.0814346	down
Walnut_newGene_5182	0.06013	0.0602786	0.108418	9.66906	10.4667	8.57013	up
gene30219	0.900676	0.789539	1.09355	0	0	0	down
Walnut_newGene_5555	0.239982	0.0661019	0.16721	0.871838	1.94218	1.84848	up
Walnut_newGene_3739	0.0692674	0.571367	0.0699043	2.88922	1.92517	2.07168	up
gene15089	38.5314	17.2927	16.7242	1.18306	1.27952	1.65497	down
gene29959	0.748981	0.697063	1.13696	0	0	0	down
gene35956	8.03703	14.5862	12.2294	0	0.040601	0.0459987	down
Walnut_newGene_4537	1.65811	2.10165	2.11553	0	0	0	down
gene35865	4.69137	5.49841	5.01733	0.0331421	0.0473375	0.0708728	down
gene31046	2.97339	2.77167	3.32937	0.510206	0.487148	0.514135	down
Walnut_newGene_210	1.80532	3.14269	1.69242	0.233636	8.31463e-06	0.496937	down
gene11410	5.14651	3.56917	3.44934	0	0	0	down
gene24504	76.2713	90.2318	95.0862	423.369	359.382	339.014	up
gene30938	30.8415	29.2967	25.3236	1.1006	1.56199	1.97232	down
gene16569	6.17733	8.11478	7.39686	29.4993	32.0221	32.1318	up
gene42549	6.49425	7.98251	9.22254	0.313176	0.37977	0.200594	down
gene31134	0.227652	0.214102	0.0658888	12.9998	14.9294	12.9584	up
gene35300	9.0264	12.0511	14.4709	1.08544	1.00149	0.67391	down
gene30664	327.692	656.738	649.409	0	0	0	down
Walnut_newGene_1099	1.82525	3.61817	3.78757	0.592852	0	2.15728e-07	down
gene21386	122.436	119.221	107.626	1716.7	1968.76	1991	up
gene22003	0	0	0	17.6775	20.8243	21.3215	up
gene9160	7.20736	8.11103	8.50983	0.409611	0.595817	0.509227	down
gene20018	0.748467	1.13763	1.13762	0	0	0	down
gene32150	52.7232	78.0614	78.3499	3.58708	4.79266	5.02497	down
gene30309	1.16521	1.78874	2.03956	54.272	60.8817	61.9642	up
gene41417	0.248804	0.581589	0.463687	0.0665642	0.0641036	0.0242769	down
gene33991	4.51191	4.2963	3.41677	0.850789	0.61504	0.60384	down
gene16049	0	0.320976	0.522667	22.6915	31.4248	32.3608	up
gene35774	7.58959	8.04858	8.50415	1.39965	1.25799	0.907465	down
gene27749	0.69596	0.52755	0.478282	0.219516	0.0257121	0.0867662	down
gene17520	14.1064	27.0303	23.1548	0.167023	0	0	down
gene4751	1.50715	0.612843	1.3367	0.0740857	0.0687571	0	down
Walnut_newGene_382	2.48392	3.03451	2.66881	0	0	0	down
gene29710	3.76462	1.44506	3.25715	0.146209	0.458733	5.88751e-05	down
gene23034	36.4608	38.8544	37.0486	0.00964733	0	0	down
gene17137	121.482	201.132	188.997	9.71785	13.5044	13.9157	down
gene8686	12.5869	13.7909	13.5865	147.395	152.747	139.056	up
gene39854	13.1837	7.48241	7.90188	84.0081	89.176	92.6307	up
gene8739	27.7455	33.0117	23.5359	0.912608	1.52091	0.2486	down
gene36314	3.24694	6.07869	4.98003	0.372189	0.151103	0.605154	down
gene29649	42.3833	37.8538	37.4287	4.41007	3.42778	4.29049	down
gene37530	1.10769	0.756637	0.657366	4.21771	4.68799	5.07804	up
gene6363	857.687	1227.51	1335.36	0.583204	0.185058	0.520889	down
gene15789	1.10278	3.84658	3.84227	0	0	0	down
gene39023	2.754	0.876355	0.615632	13.1926	13.5335	12.1427	up
gene4429	1.15037	1.21511	0.828761	0.12378	0.0797527	0.0224384	down
gene8671	1.55232	1.98277	1.51981	0	0.0218153	0	down
gene14775	5.51357	5.3129	4.29427	0.19084	0.0900623	0.134447	down
gene37383	14.3949	25.4738	25.7599	0	0	0.0753985	down
gene29301	29.4847	33.4397	31.426	0	0.0429102	0.0325861	down
gene24458	0	0.0291806	0	11.8105	9.60187	10.5102	up
gene30062	40.2165	28.695	28.4386	0	0	0	down
gene30942	14.159	11.8203	11.9406	2.80743	3.1067	2.94881	down
gene21370	0.201451	0.145431	0	6.2006	6.38653	6.23642	up
gene31030	7.32501	2.66055	2.14584	0	0	0	down
Walnut_newGene_2361	0	0	0	69.1392	89.3084	83.6749	up
gene34047	10.1724	5.35862	5.29186	0.289048	0.620204	0.705547	down
gene27714	2.69556	1.56	1.77332	0.0910582	0.226204	0.099484	down
gene32113	20.204	17.3565	16.6045	1.00156	0.475412	1.79168	down
gene40035	30.3221	32.7912	29.9323	2.5724	2.56619	3.0786	down
gene1809	0.814758	1.52528	0.699166	4.16706	4.08967	3.5206	up
gene26496	0.156571	0	0	2.57185	2.55687	2.57675	up
gene7844	63.3132	60.7289	55.2391	11.86	10.623	11.1959	down
gene37997	4.78406	8.02398	6.74721	0.423107	0.335052	0.375731	down
Walnut_newGene_5413	5.82636	7.00872	6.10287	0.456979	0.192762	0.272069	down
gene3296	0.727764	0.912686	0.908341	0	0.0808245	0	down
gene24281	0.636506	1.8254	1.55897	0	0.0664456	0.0755008	down
gene12377	3.72028	2.43932	2.3867	0.567021	0.65116	0.305896	down
gene5737	1.12527	0.289343	0.389449	4.39976	3.61458	3.53859	up
gene38346	0.262827	0.288267	0.369822	0.0254504	0.0246167	0.0555688	down
gene29370	7.74831	9.75048	10.2776	0.968755	1.11405	1.39987	down
gene22429	1.1804	1.26389	1.81323	0.0468337	0.0677621	0	down
gene14428	1.57015	2.48911	2.77089	0.156502	0.587894	0.666473	down
gene12398	7.11264	5.23971	4.97707	0.746902	0.830632	0.894367	down
gene26209	2.18113	1.46537	1.06908	7.7079	9.15314	9.08817	up
gene18970	3.77379	2.80035	3.72716	0.10826	0	0	down
gene11707	1.37922	1.08175	0.900843	0.0642518	0.0459189	0.0859148	down
gene1374	11.5672	15.6977	14.692	3.61997	2.9397	3.44098	down
Walnut_newGene_4765	0	0	0	8.10642	8.67004	9.94939	up
gene14351	3.90491	4.31234	5.1697	0.365679	0.205361	0.394649	down
gene25334	1.54582	1.67578	1.95957	0	0	0.0412563	down
gene30070	14.9512	12.8918	14.1799	0.765686	0.90889	1.0047	down
gene29306	5.92183	5.10983	4.89249	0.380182	0.463003	0.301153	down
gene10049	1.40312	2.0093	2.27967	0.205232	0.290128	0.329822	down
gene34727	1.69195	1.48745	2.04227	0	0	0	down
gene21603	1.35571	2.80833	1.24453	0.0521792	0.101414	0.0573495	down
gene20843	13.6462	9.80859	10.3348	0.221626	0.070132	0.236756	down
gene1314	2.36031	2.15119	1.91403	0.274686	0.109493	0.123375	down
gene10872	8.44295	5.70301	4.21066	0	0	0	down
gene41521	0.0513524	0	0.094856	1.18858	1.01965	0.76762	up
gene42568	0.507987	1.49181	1.89315	0	0	0	down
gene5007	18.9797	17.8946	23.8427	124.306	106.283	110.515	up
gene33960	0.282367	0	0.114654	6.10958	5.19212	6.43945	up
gene25440	4.44449	5.66578	6.28426	0	0	0	down
gene2510	0.495173	0.352403	0.286818	1.75809	2.69214	2.65175	up
gene9190	1.64858	1.82071	0.873496	0	0	0	down
gene36733	1.82535	2.30795	1.79223	64.4525	61.4892	69.1357	up
gene566	22.0933	29.0242	26.8803	4.15226	4.02623	3.71685	down
gene34546	6.43432	11.5882	12.47	1.51211	1.85707	2.06628	down
gene7160	2.12389	4.7062	5.2385	1.15303	0.982574	0.554829	down
gene18167	0	0	0	8.72095	9.86417	6.53106	up
gene8944	53.9472	55.7473	57.2141	12.2436	11.0617	13.1807	down
Walnut_newGene_7137	0.580281	1.02707	0.883139	0	0	0	down
gene34154	2.56408	1.68954	1.78502	12.8632	13.0798	12.6954	up
gene2606	16.4461	6.19838	5.84846	0.0271918	0	0.0297212	down
gene37450	3.75292	7.36387	6.13314	45.5822	38.7064	38.3595	up
gene28322	10.6872	10.6324	10.0926	126.894	122.929	122.048	up
gene16339	7.06931	8.52863	7.26924	0	0	0	down
gene36234	1.00782	1.56678	1.13279	0.0757424	0.144391	0.204523	down
gene26721	54.7754	71.4821	78.9524	0.511049	0.688049	0.467499	down
gene2345	16.9366	13.3406	11.1709	2.33083	3.30409	1.32506	down
gene1155	3.61188	5.27488	5.11697	23.3185	21.2311	19.6253	up
gene27638	2.9721	4.98709	5.2005	0.124119	0	0.0670761	down
gene9380	3.64809	2.94785	3.06978	0.151132	0.0732414	0.269982	down
gene15778	1.45036	1.27746	1.4783	22.1381	22.528	23.3853	up
gene16168	24.8242	30.3207	28.4215	116.531	113.492	120.751	up
gene2941	1.58827	1.86022	1.63738	0	0.102067	0.234181	down
gene16972	2.7742	1.74203	2.65167	0.162536	0.362303	0.175734	down
gene3936	1.47237	0.841699	0.509403	4.73031	5.33421	5.62819	up
gene5991	4.19187	3.66406	4.02334	0.0248788	0	0	down
gene35797	1.33128	0.372649	0.463405	4.40752	3.30627	3.62062	up
gene29351	14.3445	10.953	10.8329	2.49401	2.31635	2.50513	down
gene8329	3.93748	2.01374	1.79273	0	0	0	down
gene26077	4.79389	2.9005	2.12468	0.148002	0.125917	0.365732	down
gene12277	1.46211	0.694595	0.693962	0.0913587	0.0795339	0.278818	down
gene41617	1.30506	1.81352	2.54467	0.176935	0.0825543	0.0929387	down
gene32793	1.78151	0.528163	1.2313	5.91113	7.43167	7.0755	up
gene9017	14.4661	16.4796	18.4322	1.63333	1.03783	1.69486	down
gene25843	35.0153	33.9368	29.7312	0	0	0	down
gene39745	1.64779	0.990275	1.3501	0.0864261	0.0352022	0.10652	down
gene7703	0.483434	0.575908	0.399308	13.4348	12.3364	11.3905	up
gene35348	0.763847	0.856983	0.912718	3.31249	3.50634	3.35155	up
gene28060	21.8481	16.1403	16.7516	1.61461	1.93765	2.34362	down
Walnut_newGene_2472	11.5558	6.23267	7.07552	2.299	1.57151	0.88693	down
gene16546	20.1152	18.462	18.3847	1.48952	1.52796	1.99569	down
gene29656	2.54401	6.70334	5.84213	46.3122	42.3782	43.8571	up
gene25830	169.023	181.022	184.947	26.0644	24.012	28.5426	down
gene8451	9.29367	7.33001	5.39736	1.31885	1.26862	0.947422	down
gene2311	0.0813381	0.0505883	0.109548	0.64854	0.72029	0.500907	up
gene35392	5.89635	4.97405	4.65783	0.951753	1.43671	1.02168	down
gene40518	0.0844547	1.99022	1.75823	0	0	0	down
gene18954	1.19595	2.30046	1.86706	57.1894	51.0964	56.7487	up
gene42129	6.01816	4.00303	3.8054	0.114579	0.421064	0.178916	down
Walnut_newGene_898	12.1211	11.659	12.8733	0	0	0	down
gene25100	14.0621	15.5247	15.8244	0.502549	0.765398	0.360559	down
gene10877	138.582	157.466	157.14	11.1138	11.6107	11.2485	down
gene2072	3.33249	3.57651	3.71294	0.126885	0.0202948	0	down
gene22792	7.85471	12.7328	13.5388	0	0	0	down
gene42364	9.66278	7.68525	6.89429	0.192873	0.375917	0.691374	down
gene29364	21.52	24.225	24.9582	0	0	0	down
gene26774	1.92212	1.26498	1.3362	0.130096	0	0.187434	down
gene23261	17.5942	18.0402	17.5429	2.27482	2.8781	2.10851	down
gene31033	1.89041	2.38462	2.02741	0.154925	0.0361925	0.168488	down
gene38679	4.61115	4.10404	3.70492	41.042	41.7594	38.9347	up
gene6853	40.8672	25.1285	20.5473	0.344408	3.29512	2.23573	down
gene26111	2.2142	3.69133	3.30154	0	0	0	down
gene11796	2.29738	3.43304	3.65235	0.17326	0	0.0914166	down
gene8423	1.73893	2.304	2.23434	0.0154614	0	0	down
gene31733	0.111284	0.240872	0.0374442	1.56254	1.13864	1.62412	up
gene13653	0.307429	0.833051	1.11815	0	0	0	down
gene36083	10.4889	6.36465	4.52598	0.269309	1.15031	0.737929	down
gene1182	3.86081	2.93366	3.80467	26.4925	30.7918	27.3009	up
gene5119	11.6313	14.2153	14.9511	2.82698	3.09792	2.77133	down
gene23027	2.73923	4.71278	4.25937	0.278588	0.177783	0	down
gene1218	0.893613	1.02576	0.523089	0	0.0278152	0.0627449	down
Walnut_newGene_5613	0	0	0	1.24569	1.22859	0.960914	up
gene39728	0.916846	2.15395	1.78085	54.3739	50.6516	48.9191	up
gene28700	2.28952	3.86667	4.54575	385.113	259.376	295.664	up
gene34675	4.67712	5.71209	6.75748	0	0	0.27715	down
gene13474	2.61456	4.28549	4.22187	0	0	0	down
gene30796	17.9322	22.7511	23.1392	2.46025	1.96024	1.762	down
gene37524	16.3962	14.6858	14.1989	0.702577	0.866803	0.629038	down
gene27353	85.101	91.3299	95.7575	2.80873	2.57817	3.32049	down
Walnut_newGene_952	0	0	0.042226	1.78213	1.80002	1.60613	up
gene36141	0.838132	0.859564	1.05173	5.76819	4.97967	5.24121	up
gene38500	29.3084	39.2409	36.9332	165.22	167.918	168.219	up
gene25071	7.34747	10.2378	11.0677	0.106716	0	0.117439	down
gene31447	0.241822	0.229256	0.395872	11.9642	11.6714	10.8044	up
gene31706	9.06757	10.1747	8.95555	0	0	0	down
gene34660	1.05717	1.93336	1.8765	0	0	0	down
gene34684	9.90055	6.01846	4.38998	0.250648	0.0798079	0	down
gene38908	19.2822	19.729	21.1789	1.48225	1.37396	1.68149	down
gene35573	0.128839	0.937146	0.837364	0	0	0	down
gene23229	10.6398	9.03674	10.469	0	0	0.0931637	down
Walnut_newGene_4117	0.78066	1.01868	1.16716	0.0566247	0.0545362	0.0613089	down
gene15987	9.30296	10.0216	12.7712	3.36501	2.87766	2.54941	down
gene36951	0.761523	0.710596	0.812633	0.0783475	0.225133	0.0846289	down
gene36593	13.4001	15.4211	12.6308	3.29432	3.07134	4.14901	down
gene38891	26.4269	31.4357	30.4213	5.67942	5.30873	5.27412	down
gene18221	0.829179	0.582232	0.673248	0	0.0682893	0	down
gene8607	5.29126	10.1766	9.38426	0	0.0231438	0.0519702	down
gene34801	4.07581	3.53842	2.62597	0.50907	0.206798	0.785359	down
gene15483	0	0	0.0576886	8.29225	7.81961	8.44683	up
gene25225	0	0.0805479	0	0.932037	0.565868	0.905564	up
gene39538	0.612751	0.65892	0.817274	0.178804	0.140001	0	down
gene4771	26.4576	26.2859	27.7617	6.2561	6.51841	6.09304	down
gene41480	10.315	11.3349	14.2028	0.792793	1.46982	1.04077	down
Walnut_newGene_568	0.533724	0.458976	0.375201	4.18432	3.32556	4.39963	up
gene13509	1.02468	0.501996	0.413718	8.70672	9.90213	9.88413	up
gene23210	4.83511	6.26583	8.57331	71.171	91.7168	91.5183	up
gene33434	0.601115	0.973859	0.268208	2.22597	3.33336	4.33524	up
gene10284	2.46881	1.79372	2.28194	0	0.15542	0.0635723	down
gene31208	0.463139	0.498886	0.2864	0	0	0	down
gene5348	5.06393	4.67436	3.46883	0.231285	0.221255	0.0500062	down
gene29049	0.133549	0.276081	0.404789	2.12601	1.73479	1.69865	up
gene11390	0.0596145	0.0557836	0	3.90206	4.57783	3.5423	up
gene33871	1.06455	1.30822	1.76998	0	0	0	down
gene41885	2.04227	0.977059	1.24406	0	0	0	down
gene5946	0.686842	0.775086	0.525003	0.112996	0.106985	0.0812594	down
gene1601	1.04162	1.39252	1.23223	0.0913303	0.202229	0.0621858	down
Walnut_newGene_53	1.32536	2.24696	1.98677	0	0	0	down
Walnut_newGene_357	8.77343	9.50314	10.9208	0	0	0	down
gene24582	5.77448	4.52885	4.5759	0.18788	0.501159	0.666018	down
gene17211	1.28606	2.98815	4.06626	12.7216	12.4945	10.7406	up
gene14357	20.2431	18.9195	19.8905	0.203338	0.309263	0.174086	down
gene36801	0.647276	2.67643	2.28699	0.16176	0.190366	0.203887	down
gene12013	39.008	33.6574	33.6819	3.57852	4.38616	3.88764	down
gene32213	0.404329	0.129199	0.277304	2.00618	1.69113	0.966262	up
gene30145	1.44387	2.1731	1.52355	0	0.602662	0.432006	down
gene42411	3.51581	1.73366	1.17897	14.8138	13.6727	14.5567	up
gene22909	196.696	151.215	146.37	12.9817	15.6858	16.6018	down
Walnut_newGene_7535	2.10111	1.97708	2.33807	0	0	0	down
gene4583	10.2257	15.7817	19.4826	1.68453	1.53077	1.61542	down
gene25889	63.1673	56.6836	55.3691	6.20332	9.43454	8.96483	down
Walnut_newGene_5104	0.109869	0.236566	0.222043	1.09292	1.05351	0.973068	up
gene12810	1.03112	1.36384	0.894221	5.98936	6.0439	6.36072	up
gene13200	13.2561	15.5072	12.3158	0	0	0	down
gene24702	5.56941	3.96717	4.21274	1.23884	1.00838	1.17486	down
gene21936	3.0744	3.61613	2.83609	0	0.0453886	0	down
gene10175	9.88357	11.101	9.50584	0.244875	0.1261	0.147723	down
gene22919	2.02252	3.12993	2.09358	55.523	53.1196	57.4597	up
gene16743	10.2258	12.6609	11.2415	0.2153	0.144954	0.0779162	down
gene39792	7.62044	8.32164	8.81985	0.710787	0.878457	0.9884	down
gene7213	13.1072	23.2801	20.3108	6.35142	6.17006	7.25089	down
gene11007	4.57003	4.48805	3.88505	0.141153	0.191903	0.0479473	down
gene6692	2.66049	2.15539	2.52596	16.5312	14.6573	15.759	up
gene5913	0.214318	0.0791563	0	1.23626	1.17714	0.851373	up
gene22513	2.40512	1.41548	1.39713	0.156335	0.0239474	0.0273707	down
gene37092	4.00096	3.92202	4.92636	22.0911	20.5158	20.311	up
Walnut_newGene_4348	0.106716	0	0	2.84546	2.4348	2.88765	up
gene4792	0.664616	0.822426	0.784776	8.4329	8.4559	8.14883	up
gene28514	0.285797	0.355276	0.145535	1.8907	1.6367	0.948801	up
gene25453	4.66632	2.80825	1.94124	0.318607	0.182385	0.10238	down
gene13293	20.3164	30.9885	26.7008	0.996183	0.705992	0.635263	down
gene15718	46.6213	29.5553	27.7989	4.01479	6.83599	5.38963	down
gene37344	4.20481	7.33495	7.81879	0.83548	1.14936	0.529256	down
gene16334	2.8367	1.92049	1.75081	24.1157	23.0713	23.0471	up
gene23065	1.88354	4.48343	4.33715	0	0	0.101175	down
gene16111	15.3836	18.3622	16.7406	1.28561	2.25735	1.53683	down
gene12744	29.8451	34.0997	31.8463	0.939017	1.04616	1.05725	down
gene4915	21.0616	21.8722	20.0544	0	0	0.0363104	down
gene33865	13.6716	17.1229	15.8339	2.41216	1.77784	2.2528	down
Walnut_newGene_471	0.627881	1.23018	0.389611	0	0.0365909	3.36203e-05	down
gene23725	1.27781	0.360085	0.395169	3.77206	3.89897	3.04382	up
gene40563	2.90643	3.3387	3.47834	0.0523919	0.0501062	0.140688	down
gene34153	0	0	0	2.15585	1.91465	1.76242	up
gene15687	21.7658	32.2391	32.5779	6.73055	6.85993	7.46053	down
gene38629	13.8198	14.0482	13.3549	2.41715	3.76883	3.45598	down
gene42709	3.08837	2.94949	2.90765	0.475484	0.396942	0.576106	down
gene28755	0.594391	0.232125	0.606054	4.48588	4.94112	4.21056	up
gene39053	15.9539	22.1345	21.982	0	0.0660914	0.0575916	down
gene8659	22.2936	25.8079	26.7048	4.78786	4.87588	4.37071	down
gene28758	8.64283	9.27229	8.91156	0.945309	1.30837	1.32922	down
gene21246	0	0.0378764	0	0.302674	0.525048	0.61407	up
gene1726	1.29139	1.23213	1.18577	40.004	33.791	34.7004	up
gene37887	6.76918	8.84489	9.25139	0.321233	0.246164	0.268216	down
gene36447	14.2783	23.1922	21.4655	0.0484488	0.0465603	0.0130741	down
gene30778	1.49777	1.64474	2.26214	0	0.290153	0.188512	down
gene11514	1.68927	0.952394	1.01702	0.0188403	0	0	down
gene16131	2.12894	5.15097	5.17905	0	0	0	down
Walnut_newGene_6410	5.06014	5.53171	5.32712	0	0	0	down
gene4135	3.28778	2.11583	3.20686	0	0	0	down
gene22563	226.028	204.257	201.019	0	0.262101	0.296584	down
gene29595	4.40238	3.48537	2.91763	0	0	0	down
gene38328	1.35139	0.710436	0.739184	3.88417	4.81228	4.00736	up
gene24242	4.43957	2.17508	2.14695	0.631252	0.377284	0.434037	down
gene35745	14.4416	7.35303	6.69692	0.054925	0	0.176378	down
gene41286	40.8055	47.669	54.5584	6.49161	4.32346	5.46919	down
gene14875	0.1042	0.0487085	0.02638	0.383656	0.532651	0.575201	up
gene29981	6.52969	4.07758	3.46855	0.483722	0.723917	0.689359	down
gene33391	7.97252	2.64126	3.08659	0	0.27104	0.123775	down
gene27160	1.08564	1.32215	0.696761	0.04499	0	0.0470297	down
gene39354	8.95353	6.46387	6.7715	40.1341	43.6244	43.8164	up
gene25349	27.4694	25.9023	23.8509	111.617	108.96	109.621	up
gene31185	32.7534	90.2811	84.3982	13.0284	8.95843	9.19624	down
Walnut_newGene_3814	3.73888	2.7766	3.42414	37.1612	35.1855	31.0607	up
gene32922	38.2176	26.4213	23.7196	2.54652	3.75252	3.68413	down
gene40323	5.72075	3.24022	4.17241	0.17135	0.0505686	0.113574	down
gene32525	48.4557	64.5413	58.4357	14.3577	13.4283	10.9591	down
gene40028	10.1201	8.36511	8.44174	0.342887	0.12897	0	down
gene20866	0.736075	0.898466	0.783956	0	0	0	down
gene31053	2.87043	3.41089	3.95089	0	0.0584235	0.120563	down
gene11851	4.79923	3.77566	5.23113	0.268552	0.431657	0.184015	down
gene33652	2.48622	1.70506	2.88113	0.277398	0.606786	0.195959	down
gene33518	3.91392	5.21333	4.61728	0.0679384	0.256883	0.0727331	down
gene7629	31.2114	38.7789	39.978	0.310454	0.589346	0.623894	down
gene12974	0.943262	1.0473	0.883579	0.0239118	0.13157	0.173674	down
gene22488	4.50443	4.53767	3.72045	0	0.0628352	0	down
gene2573	3.30725	1.6811	1.51002	11.8155	10.6163	10.4827	up
gene17131	0.67066	0.445179	0.654945	9.83892	10.1708	10.6589	up
gene24919	5.97059	3.48293	2.65309	0	0	0	down
gene25030	0	0	0	43.0276	32.5347	35.4325	up
gene28814	1.34036	1.77952	1.57003	0.104365	0.144312	0.100051	down
Walnut_newGene_1575	16.3867	18.9864	16.5405	3.18447	1.30169	2.00368	down
gene28968	0.147611	0.137625	0.299727	2.91473	2.66278	3.62345	up
gene38694	2.77105	1.79565	1.69198	0.512922	0.181248	0.410616	down
gene21695	0.492431	0.555396	0.875334	6.02633	5.36909	5.3724	up
gene32687	6.89686	4.49845	4.27287	34.0037	34.0511	34.5939	up
gene12563	12.922	11.33	11.4536	1.36555	1.28989	0.990026	down
gene1361	0.640145	0.496942	0.21891	4.58086	5.25655	4.41786	up
gene43118	1.09856	0.864443	1.16771	12.5695	13.1119	13.5973	up
gene14465	6.32163	5.89631	5.01403	0	0	0	down
gene37208	10.8729	9.06834	9.24088	1.81476	2.49729	2.27507	down
gene21215	6.55497	3.54353	3.35995	0.904209	0.857728	0.398239	down
gene23035	0.910665	0.591888	0.815176	4.75296	4.91459	5.36278	up
gene2791	37.8959	42.5719	45.0579	0.636333	1.33423	1.3545	down
gene3456	12.4686	13.3481	14.2531	63.6798	65.6529	57.0872	up
gene3603	1.94487	1.60171	1.7849	0.451621	0.310644	0.509617	down
gene39817	2.87845	4.35581	4.04263	0.572622	0.542459	1.04056	down
gene33837	96.8008	129.171	140.66	0.381635	0.238781	0.202282	down
gene29844	3.83124	4.04275	5.17845	0	0	0	down
gene39488	1.6038	0.489977	0.532864	0	0	0	down
gene31115	11.7292	16.7641	19.0991	0.985879	0.572161	0.568774	down
gene18057	3.50517	3.12659	4.50256	0	0	0.327742	down
gene3534	2.82028	1.27526	1.03166	0.0641128	0.125528	0.0261611	down
Walnut_newGene_1619	1.90752	1.85617	1.54326	16.5185	12.6558	14.0846	up
gene3270	4.65691	3.86545	3.54222	1.0146	0.967715	1.17501	down
gene3485	95.9101	97.8091	97.3366	4.73863	3.19173	4.84721	down
gene1926	4.34852	6.13686	4.91715	0.825318	0.871139	0.541932	down
gene37371	4.60447	4.04173	3.66515	0.249953	0.274741	0.293782	down
gene18462	1.36358	0.89696	0.321458	5.53327	3.80742	4.96081	up
gene32289	13.1444	14.1009	13.7706	0.774846	1.11612	1.18262	down
gene41763	3.31922	3.36785	3.28125	44.2318	48.6084	46.4279	up
gene8454	4.8331	5.08436	4.78377	55.4164	56.4522	56.5153	up
gene21043	2.90752	1.16207	1.46926	0.0792235	0.224226	0.171493	down
gene12058	1.36247	1.66164	2.30867	8.29933	9.41319	11.2131	up
gene30663	6.62363	11.9848	9.99069	1.25276	1.95867	1.3641	down
gene42104	2.02684	1.6749	1.91661	11.4345	12.7577	11.9496	up
gene17903	0.330105	0.239994	0.150253	1.7959	1.51533	1.6817	up
gene23085	1.64248	1.73338	1.6064	0	0	0	down
gene36776	0.3786	0.373515	0.640188	0	0	0	down
gene16704	35.9475	34.5673	29.1717	3.82295	3.62501	3.57722	down
gene1093	1.44413	5.35306	6.49913	0	0	0	down
gene14899	1.05708	1.34837	1.4566	9.93522	8.37498	11.3272	up
gene34234	1.76951	1.36734	1.05944	12.1409	9.3896	8.88627	up
gene31273	5.69172	16.9036	17.579	0.0585954	0.0557612	0	down
gene28542	4.63255	4.61145	4.42801	29.7494	30.1155	28.7875	up
gene3582	6.61429	5.57148	5.97805	0.0779825	0.149707	0	down
gene28089	1.81092	1.42164	2.31967	23.1985	22.9231	26.0888	up
Walnut_newGene_5921	25.9078	31.3147	33.2554	6.61638	5.69078	5.52005	down
gene16360	2.22343	1.16213	1.00829	0.0560627	0.11961	0.0464063	down
gene12976	1.71328	0.923206	1.13705	0	0	0.0297838	down
gene37594	31.4426	64.7568	62.8712	3.35937	3.60454	3.91385	down
gene35168	0.988001	0.723495	0.842445	0.289996	0.273489	0.152846	down
Walnut_newGene_271	5.83652	5.86989	5.98457	0.0525948	0.0996286	0	down
gene5677	1.66985	0.987088	0.53763	0.0975404	0	0	down
gene23726	0.0970018	0.0448777	0	4.46301	3.87102	4.38794	up
gene25470	22.5505	25.7855	30.1513	5.88925	5.05622	4.64156	down
gene7528	15.2331	13.8325	13.9065	0	0	0	down
gene1764	0.879363	4.01729	4.62833	16.6823	23.9922	24.6433	up
gene38464	5.63631	3.35021	3.72635	0	0	0	down
gene39400	0.395157	0.147442	0.0412686	1.25704	1.51268	1.16185	up
gene3191	2.048	3.46603	2.02763	0	0	0.0525043	down
gene8820	0.503229	0.199267	0.119125	1.14871	2.2588	1.99585	up
gene14343	8.70195	7.57889	8.12579	0.307436	0.03815	0.130307	down
gene4101	0	0.804088	0.320087	33.3048	24.5681	22.7846	up
gene33954	5.26526	5.89455	4.90746	0.372716	0.398574	0.303663	down
gene36857	0.53609	0.907145	0.91669	153.711	153.483	149.912	up
gene10855	48.0239	49.7436	49.5957	1.54761	1.41242	1.46616	down
gene31372	2.46645	2.83012	3.03417	12.7862	11.1362	10.3725	up
gene14537	1.83841	1.87778	1.59962	0.203756	0.183187	0.147878	down
gene36410	4.68126	2.84617	2.39389	0.361354	0.399559	0.834643	down
gene21230	0	0	0	14.6592	14.8602	17.415	up
gene24369	3.5538	5.27657	5.01672	0.561309	0.294027	0.252371	down
gene4737	9.04259	13.9839	12.9138	59.7412	55.1994	56.1503	up
gene31567	8.84581	9.5657	5.66239	32.7352	37.0147	42.8531	up
Walnut_newGene_5682	0.0212305	0.0389135	0.0214346	7.26435	5.90225	6.36689	up
gene31621	12.6617	14.2596	11.1431	94.4365	105.888	92.4897	up
gene15580	0.18005	0.580518	0.407398	408.489	396.151	434.203	up
gene5820	11.0539	5.57457	5.54762	35.1767	36.1081	32.7912	up
gene33010	1.61036	1.79884	1.46866	0	0	0	down
gene39046	23.9186	17.3958	15.772	3.57568	3.74559	4.61787	down
Walnut_newGene_1576	2.19915	2.62074	3.21875	0	0	0	down
gene25022	1.05121	0.725453	0.583234	5.62381e-06	0.0133454	2.09701e-05	down
gene31977	0	0	0	0.847557	0.589943	0.44576	up
Walnut_newGene_1437	0.977215	1.80793	0.691485	5.22934	3.56852	5.26022	up
gene2661	31.7547	19.1606	17.3382	0.762869	1.21203	2.35376	down
gene11984	0	0	0	8.99554	3.4595	3.13869	up
gene32038	1.70723	1.29987	1.05641	0.220633	0.0887083	0.180108	down
gene23696	0.166418	0.943022	1.008	22.4999	19.7165	22.0302	up
gene30403	195.12	481.457	473.877	0	0.0548025	0.0309952	down
gene22446	244.672	356.862	360.263	0.136015	0.0863976	0.243429	down
gene7830	7.05883	7.4758	7.75132	1.83004	2.17881	1.22146	down
gene28863	0.425656	0.603532	0.181067	0.0342027	0.0336301	0.0189317	down
Walnut_newGene_167	2.86341	1.50496	3.18682	0	0	0	down
gene30669	2.88803	1.65306	1.94278	0.0855953	0.159138	0.272071	down
gene5456	2.19829	1.95509	2.33065	0	0.100166	0.0375999	down
gene24547	0.503976	0.385696	0.285677	18.7552	16.6854	16.8794	up
gene6148	3.31521	5.12197	4.23007	0	0	0	down
gene40727	4.15378	5.09681	5.6041	1.0807	1.08367	0.837577	down
gene32561	1.14373	1.06381	1.18536	0.090599	0.201992	0.162907	down
gene3489	1.21305	0.828312	0.992257	8.83249	8.00035	9.72022	up
gene11614	10.9902	11.298	11.9236	0.531136	0.673321	0.799817	down
gene28563	2.36464	2.70322	2.10026	22.7383	20.1808	18.2355	up
gene20886	1.61606	1.59814	1.61366	0.201343	0.182969	0.282141	down
gene38252	1.05283	1.39834	1.52173	0.0246019	0	0	down
Walnut_newGene_2152	0	0	0	3.66866	3.94079	3.27492	up
gene39617	0.61294	1.02897	1.70956	0	0	0	down
gene1625	0	0	0	16.6275	23.8411	24.9496	up
gene13954	55.4603	55.7273	63.1861	5.57071	3.01403	2.28474	down
gene464	0	0	0	2.95515	3.67786	4.48596	up
gene26780	0.102037	0.0315995	0.103419	13.201	13.0224	13.0556	up
gene39930	3.53633	3.48137	3.49506	0.369148	0.361809	0.359748	down
gene16507	0.789003	0.412284	0.378662	0.0508835	0.108284	0.11139	down
gene29412	1.0497	0.888471	1.07546	0	0	0.262365	down
gene36511	19.1879	18.1678	19.2746	1.22576	1.08943	2.34144	down
gene33525	0.0456961	0.0283685	0.0154174	0.306603	0.217875	0.298522	up
gene41804	18.7148	25.3972	24.2927	4.9921	5.92453	5.47649	down
gene14303	0	0.0402522	0	0.546499	0.857578	1.02869	up
gene20988	2.84028	1.82592	1.20152	0.087153	0	0.0914784	down
gene38799	4.97464	4.02152	4.03909	1.01791	0.715143	0.846698	down
gene11913	1.01046	0.986217	0.894541	0	0.0261548	0.0295513	down
gene3210	10.5686	32.9007	29.2128	0.890995	1.2835	0.949272	down
gene30440	12.1815	14.5692	13.4695	1.93602	2.45103	2.15812	down
gene39615	12.7527	11.9909	13.024	0.311187	0	0	down
gene38339	0.475651	0.480629	0.376621	0.0441747	0.106275	0.0245212	down
gene35551	63.6077	95.9856	89.6164	5.49183	5.46515	5.26742	down
gene9792	2.61784	1.17999	1.10768	0.136689	0	0.0358926	down
gene31396	3.76438	3.97415	4.34651	0.404935	0.663022	0.497286	down
gene42783	0	0	0.0658431	13.5249	14.5824	12.7457	up
gene42040	32.6164	57.8655	55.6699	1.80082	2.44223	2.47911	down
gene12044	0	0.0136066	0.044598	0.596574	0.557798	0.548627	up
gene27101	6.81724	7.0539	8.28563	0.939256	1.34059	1.63055	down
gene28404	43.5467	20.7054	19.8493	0.139417	0.226959	0.109593	down
gene27597	0.979654	1.3381	1.75048	3.67529	6.97569	7.7093	up
gene36930	5.03383	2.46935	2.32328	0.122571	0.609934	0.126696	down
gene29076	2.00504	1.96668	2.06404	0.564469	0.332883	0.529017	down
gene38384	3.80678	1.97141	1.53388	0	0.0363415	0	down
gene21225	1.95002	3.7687	4.19381	0.790656	0.761992	0.0777814	down
gene41367	4.10727	3.37323	4.08064	0.213362	0.510809	0.800673	down
gene29838	20.938	25.0182	24.511	0.486957	0.293248	0.394801	down
gene39084	2.20113	2.78246	3.36537	0.190462	0.361495	0.889036	down
gene11520	2.92765	2.95648	2.69183	0	0	0	down
gene23412	0.118478	0.0929517	0.126122	2.18297	1.9788	1.90831	up
Walnut_newGene_3182	0	0	0	1.3127	1.81241	1.64147	up
gene22058	4.46223	4.70941	6.34143	0	0	0	down
gene17935	0	0	0	1.98555	0.943832	1.82844	up
gene34429	0.440373	0.695222	0.899459	9.6007	11.3866	9.70073	up
gene27033	3.16209	5.57399	6.3318	0.121963	0.231621	0.38873	down
gene10026	9.75242	8.38636	9.00145	0.134402	0.38068	0.0718184	down
gene35137	1.16399	1.63239	1.14232	0.5193	0.168548	0.164632	down
gene5475	19.1326	19.0748	20.8551	0.815678	0.800813	0.917807	down
gene24627	2.54465	2.32103	2.5864	0.0689743	0	0	down
gene39844	30.4435	26.0713	28.8246	0.559056	1.19298	0.575402	down
gene29499	1.17335	0.823694	0.829736	0.0915827	0.216066	0.024509	down
gene3673	2.32228	1.19917	1.26315	0.0460682	0.132277	0	down
gene38529	13.826	12.2349	10.123	0.312933	0.439966	0.166922	down
gene18492	5.18538	1.92287	2.59146	0.458576	0.192262	0.144782	down
gene29960	6.42762	15.9349	15.6353	101.671	82.4042	90.491	up
gene32970	5.22835	6.73078	5.17442	0	0	0	down
gene10264	3.49757	1.89025	1.90969	0.0207299	0.0391502	0	down
gene32520	0	0	0	2.36092	2.42233	1.85683	up
gene5987	2.45028	1.48682	1.81975	0	0.0407832	0.0153736	down
Walnut_newGene_5100	0	0	0	10.5671	7.03358	10.2463	up
Walnut_newGene_5271	0.660326	0.766746	0.57277	0.152536	0.0730247	0.164423	down
gene24732	1.21599	1.71863	2.06872	0	0	0	down
gene15219	0.976013	0.510095	0.57808	8.85697	8.63177	8.04432	up
gene4749	90.1903	92.7713	95.9481	0.135591	0	0.245613	down
gene41468	0.398534	0.849897	0.86257	0.0718643	0	0	down
gene38865	10.4992	7.82282	8.72155	234.648	234.723	235.844	up
gene29511	0	0.0524872	0.0282178	3.5455	2.40483	2.25277	up
gene30450	0.156895	0	0.238589	0.944159	1.28394	1.0926	up
gene16463	0.0560115	0	0.0395625	0.859326	0.545063	0.722868	up
gene27281	3.74946	5.02368	5.15604	0.773622	0.55755	0.729211	down
gene9646	20.1249	20.4363	17.1053	0.310067	0.475205	0.477418	down
gene2148	1.54451	2.08557	2.54101	0.114854	0.0548804	0.0929239	down
gene35489	0	0.0393039	0	2.95734	3.51963	4.71617	up
gene35692	6.79856	6.66119	6.31965	1.18326	1.23599	1.55612	down
gene14090	421.327	469.384	529.983	97.2169	86.4996	88.1334	down
gene37784	4.9537	3.71519	3.89642	18.6054	18.2898	18.0996	up
gene41236	17.2472	6.43177	3.62825	0	0.118535	8.1789e-15	down
gene16464	1.75267	1.99809	1.83687	0.34639	0.224272	0.168406	down
gene35324	3.50501	3.36968	3.55167	0.441109	0.372794	0.299454	down
gene4641	1.32481	1.81293	1.38893	0.327467	0.0776687	0.621947	down
gene14331	1.155	1.86297	1.17884	12.2673	10.5159	9.74735	up
gene39810	4.71978	4.21687	3.76738	29.3825	27.1573	29.2057	up
gene22220	3.56642	4.28799	3.81351	0.625948	0.442491	0.833612	down
gene18762	1.96758	1.24738	1.43983	9.5188	9.18657	11.0431	up
gene31196	6.54244	8.83459	8.64812	0.990616	0.799476	1.24569	down
gene10578	14.6418	21.0452	21.6064	1.6808	2.23264	2.29789	down
gene24695	3.74327	1.75664	2.07338	0.435869	0.373808	0.117455	down
gene13840	1.33119	1.44474	1.40284	0.391621	0.290035	0.359366	down
gene26658	4.84471	4.71416	4.52953	0	0	0.316429	down
gene22119	1.47599	1.29168	1.27819	0.081178	0	0.174025	down
gene5612	3.67011	3.64279	3.25498	13.4708	13.5951	15.8162	up
gene14319	13.0259	12.3662	9.27996	0.8178	0.886328	1.02641	down
gene2789	1.49701	1.43825	1.66879	18.4451	16.7856	17.1525	up
gene39355	77.2815	69.4451	67.0604	5.60985	4.90411	5.27297	down
gene9022	3.67378	1.33259	2.61456	0	0	0	down
gene19014	0.0705274	0.396773	0.286626	34.8954	34.7126	30.8416	up
gene41416	0.17379	0.274527	0.263796	1.17016	1.03343	0.982436	up
gene32805	0	0	0	1.07428	1.24082	0.906513	up
gene41627	11.8968	12.8527	12.6448	2.01489	1.77992	1.08644	down
gene2849	19.8386	25.9013	25.3295	216.234	218.12	221.015	up
gene20210	47.7383	60.4564	67.495	4.89911	4.80774	5.04938	down
gene41519	2.86415	2.02325	2.2818	13.7858	11.0157	12.0252	up
gene1660	5.42815	2.41968	1.78931	0	0.0283558	0.0962216	down
gene13135	34.0963	22.8399	20.9384	163.471	138.492	164.779	up
gene10149	3.51225	3.60063	3.68507	0.385417	0.575835	0.515632	down
gene2350	1.62017	2.15578	2.5555	0.295682	0.104739	0.269417	down
gene37094	5.00453	8.32426	8.85709	0.116434	0.0543641	0.121789	down
gene3550	0	0.0802342	0	5.00087	4.48325	5.22554	up
gene37724	32.8027	34.9137	36.5697	1.5545	1.28624	0.907759	down
gene35076	10.8435	8.01544	8.11665	0.264907	0.100169	0.111738	down
gene8189	2.23145	0.903226	1.32043	0	0	0	down
gene17311	4.34909	2.79743	2.64715	0.240947	0.309968	0.350037	down
gene41531	0.70852	1.00031	0.640367	12.9837	11.975	9.16245	up
gene27606	18.2031	28.3792	30.8565	135.373	240.582	239.291	up
gene13545	1.9287	1.38757	1.12684	0.0689038	0.101984	0.231694	down
gene42703	0.181107	0.0241413	0.0916125	1.25203	0.624003	0.625628	up
gene7091	1.81418	2.26325	2.25361	0.0706261	0.0834124	0	down
gene16768	10.738	16.3181	16.0376	0.282795	0.152786	0.0433574	down
gene8016	2.66526	2.09363	2.01375	50.2772	49.0327	48.1244	up
gene7998	3.68324	4.23149	3.8231	24.6024	23.4731	22.5731	up
gene16153	0	0	0	23.8559	20.8674	19.444	up
gene22620	0.255204	0.861964	0.903011	0	0.026324	0	down
gene23553	14.8196	14.3826	12.9732	0.0678227	0	0.0961764	down
gene24468	0	0	0	3.51801	4.31766	5.60575	up
gene21407	25.2575	62.8601	60.0335	1282.71	1168.64	1207.62	up
gene35249	49.4817	39.336	40.1062	4.89865	6.37331	6.42679	down
gene26968	5.87106	2.23574	3.22616	1040.05	1224.1	1280.79	up
gene14344	9.2335	11.9821	9.33688	1.91571	1.20359	1.34442	down
gene42474	3.54671	4.17059	4.91484	1.02036	0.959951	1.08518	down
gene23957	17.8974	26.0492	23.5558	0.145945	0.0687475	0.162823	down
gene25094	4.97744	4.26612	4.9012	1.40984	0.689329	0.780397	down
gene30522	5.4841	8.52701	8.22195	0	0	0	down
gene29965	12.3063	12.3258	12.5564	0.441195	0.521682	0.447446	down
gene24525	34.4012	29.1805	28.206	0.577422	0.339247	0.517218	down
gene27558	14.0612	18.2787	19.5674	0	0	0	down
gene18608	1.34837	1.20639	0.79052	0	0	0	down
gene40932	3.05739	3.17965	2.52561	16.652	17.3336	19.7978	up
gene42193	0.238019	0.508655	0.613605	0.0597537	0.0948405	0.106593	down
gene30406	4.44015	3.25852	2.99172	17.4751	16.7673	15.9387	up
gene22117	0.837633	0.664846	0.540604	0.0717697	0.0367883	0.041639	down
gene12039	2.57665	1.68216	1.97629	0.403353	0.643158	0.421095	down
gene13481	5.01584	3.05347	3.55809	16.8717	16.0954	20.559	up
gene27476	189.854	248.077	241.417	21.2993	25.5416	24.257	down
gene39414	0.0728125	0.034132	0.147911	0.78245	1.12589	1.23645	up
gene25057	2.84637	2.72851	2.04705	0	0	0	down
gene16252	9.43335	6.31045	5.74243	42.8805	39.8176	43.4872	up
gene30021	6.99095	3.69328	4.55595	0.257427	0.365565	0.186069	down
gene10116	4.94353	7.15094	7.05757	1.00991	0.911525	1.69182	down
gene32308	16.428	26.1089	24.6375	0.49111	0.995368	0.896277	down
gene38572	0.954009	0.220894	0.321543	1.65486	3.29874	3.73054	up
gene32757	8.09926	4.40642	4.34453	0.851232	0.573271	0.975744	down
gene5218	3.12368	2.51681	2.9632	65.3788	69.0618	70.9677	up
gene33197	6.02147	6.16435	7.64745	0.695512	0.910865	0.503229	down
gene39830	7.57385	10.4286	8.7753	0.0998289	0.044957	0.101881	down
gene20990	5.68823	5.75096	5.41956	0	0	0	down
gene35421	0	0	0	0.396626	0.477775	0.563256	up
gene33507	0.808538	1.83769	0.819253	0	0	0	down
gene24401	3.98914	5.16443	5.41671	0.402577	0.511251	0.340247	down
gene42629	5.45607	4.19946	2.62614	15.9481	21.174	21.7538	up
gene604	31.8834	24.0087	25.1408	1.6945	1.55195	1.4103	down
gene21166	13.6057	19.1824	21.9172	2.53883	2.57112	3.53354	down
gene2835	9.91215	5.59858	7.3171	0.327858	0.517646	0.256914	down
gene13826	41.4799	44.9038	47.6678	7.06337	7.41812	7.02753	down
gene38400	0	0	0	3.56946	3.25946	7.13184	up
gene36305	1.63528	1.64893	1.01631	7.08535	7.94096	6.90117	up
gene8402	21.7381	18.1901	17.3793	122.794	119.681	115.168	up
gene11952	12.3608	20.3929	19.567	0.777576	0.935781	1.06898	down
gene28897	1.9002	2.15406	2.40094	0.224699	0.256495	0.28983	down
gene25043	1.89382	0.927778	0.895101	0	0.0907163	0	down
gene37621	3.05726	3.91695	4.15347	20.9099	17.7951	18.9804	up
gene30228	16.7253	7.9867	7.70448	0.833437	0.971058	0.984507	down
gene31539	0.711198	0.77631	0.876365	0.0405159	0	0	down
gene21512	3.96835	8.41955	7.32116	0	0.0443323	0.0250584	down
gene24466	2.9509	0.989675	0.649488	8.63597	7.66663	7.37562	up
gene35326	1.09193	1.23204	0.593461	5.15474	5.35091	5.70957	up
gene1021	4.82335	4.87563	5.6076	22.2313	23.5674	24.2136	up
gene19064	0	0.190558	0	9.06614	10.9879	8.85286	up
gene14592	10.6349	6.2248	5.52366	0.047529	0	0	down
gene33082	8.1183	4.64994	3.65672	0.714646	0.652082	0.586264	down
gene7709	37.1147	31.3584	29.7637	7.17455	5.72207	7.97312	down
gene11033	1.1047	1.63105	1.92108	0.062678	0.0300436	0.0340147	down
gene22725	5.46413	6.8583	6.16694	0.803406	0.975262	0.515971	down
gene4933	3.41231	1.66322	2.29781	19.1362	19.1044	18.3149	up
gene33474	0.748864	1.85925	1.38482	0.141429	0	0.10316	down
gene20147	1.84558	2.04575	3.53975	0	0	0	down
gene34873	7.60177	8.76042	8.9616	0.511537	0.495809	0.720333	down
gene25082	16.5019	14.9967	14.828	0	0	0	down
gene26270	18.2292	7.2574	6.83017	0	0	0	down
gene7653	8.76452	6.80104	7.38727	1.09826	1.39218	0.593083	down
gene24153	3.8563	4.13749	3.40801	0.825288	0.745338	0.618501	down
gene32183	7.90294	5.29396	4.28444	1.02846	1.51409	1.21109	down
gene22406	39.6082	44.0463	42.9521	2.02522	2.0852	1.73403	down
gene31304	5.71629	7.1148	7.59747	1.70843	1.64922	1.73841	down
gene28949	0	0	0	21.9339	30.3942	27.0785	up
gene40820	69.9464	57.9004	56.2462	1.22147	1.81954	1.09072	down
gene30218	0	0	0	1.54662	1.21777	1.1107	up
gene30722	0.686963	0.775166	0.406227	4.77695	3.50994	4.93439	up
Walnut_newGene_4458	0	0	0	1.57693	1.92096	2.66994	up
gene25357	2.649	2.5852	3.14119	0.158701	0.145896	0	down
gene20091	0	0	0	66.5144	67.8693	74.3212	up
gene1738	110.097	153.061	159.584	26.3154	24.7102	29.688	down
gene22622	0.339065	0.0452774	0.0490596	2.43656	1.48788	1.01157	up
gene26107	2.3133	1.21147	0.893682	0.147197	0.0283456	0.0963799	down
gene113	78.8967	73.2455	64.7329	6.41064	8.09405	6.06719	down
gene14423	93.657	84.4406	85.5111	361.698	363.744	376.692	up
gene39645	49.5232	42.7651	48.8982	10.1674	9.51107	8.49804	down
gene41838	2.16628	2.27543	2.31134	15.1272	15.6289	15.4663	up
gene24865	3.90539	2.99476	3.11609	34.5051	31.5928	34.9575	up
gene22425	0	0.0770882	0.210393	0.466484	0.531737	0.837649	up
gene914	2.49549	3.6375	3.58564	0.568697	0.563493	0.814655	down
gene13886	13.884	9.58838	8.90169	0.309781	0.195549	0.385125	down
gene8595	2.27375	1.31321	1.0481	0.0302596	0.167047	0.173574	down
gene20539	30.8632	39.0212	37.8349	145.552	156.482	158.889	up
Walnut_newGene_3948	12.3516	14.9494	14.0122	0	0	0	down
gene38351	29.8084	21.9303	16.7525	1.10758	1.27394	1.15799	down
gene5237	3.21629	3.36528	2.73728	21.4541	25.9458	24.0347	up
gene42997	0.198816	0.189021	0	3.36946	4.57381	4.26799	up
gene26383	126.722	123.753	121.032	0	0	0.11112	down
gene3471	1.16714	0.418138	0.865295	10.3893	6.89799	8.01225	up
gene8727	2.65851	4.25937	2.71115	0.0544554	0.473152	0.238127	down
gene12686	7.31291	15.1924	13.9047	0	0	0	down
gene12148	0.633505	0.361854	0.303773	0.062358	0.0773863	0.0216969	down
gene993	0.148951	0.382367	0.718725	15.1776	16.5036	13.4175	up
gene17201	16.5748	14.3179	17.3449	0	0	0	down
Walnut_newGene_3307	1.26344	2.32366	2.22802	0	0	0	down
gene34407	42.9952	70.4569	67.1422	3.97375	2.94607	4.13606	down
gene18691	0.429802	0.433393	0.219051	2.3678	1.6759	2.237	up
gene20959	4.88335	4.87437	6.2594	0.0823207	0.0779996	0.0852158	down
gene2489	0.390537	0.395173	0.240407	0.104001	0.0162879	0.0365429	down
gene12982	6.7901	8.43596	9.3298	0.11284	0	0	down
gene17444	3.91206	3.15245	2.42441	0	0	0	down
gene1526	3.77289	2.47416	3.51863	53.1972	53.8518	54.525	up
Walnut_newGene_4660	0	0	0.142638	8.8627	7.02954	9.61501	up
gene21395	0	0	0	15.8997	13.0288	13.9191	up
gene39235	2.87864	4.30254	4.24931	0	0	0	down
gene148	0.232926	0	0	3.79689	3.59871	5.30308	up
gene37159	1.45192	1.87473	1.35779	0.146829	0.202735	0.344203	down
gene22246	0.718242	0.483209	0.757298	29.06	26.9018	28.3576	up
gene5185	2.0073	1.6829	1.76296	0	0	0	down
Walnut_newGene_5665	6.67745	5.63803	6.09829	0.0510199	0	0	down
gene42157	239.205	284.214	275.74	26.9528	27.7395	27.4698	down
gene6789	4.71369	3.53561	4.0385	0.659263	0.399027	0.408751	down
gene5615	38.7003	37.8907	36.5442	8.66741	8.16078	9.80352	down
gene6766	3.37947	3.78026	3.50341	15.4196	14.809	14.9379	up
gene16202	5.8355	4.27809	3.6719	0.262801	0.482953	0.604367	down
gene38573	4.51552	2.73323	2.3141	16.9575	12.3736	15.7443	up
gene13729	41.9689	43.9694	47.6403	0	0	0	down
gene5355	1.34631	0.750208	0.751898	0.0591696	0.169148	0.253041	down
gene10654	2.7253	2.67656	2.8045	0.360075	0.192156	0.307953	down
gene24632	56.9973	62.7702	59.194	0.221903	0.208652	0	down
gene15641	131.61	184.139	176.301	0	0.0429554	0	down
gene37819	1.69187	1.17112	1.19749	0.254989	0.22579	0.143155	down
gene20559	5.36012	3.03962	2.73486	0	0.0867471	0.29453	down
gene27351	2.22646	1.65561	1.90059	0	0	0.0610688	down
gene35914	6.23794	4.49788	3.71272	0	0	0.125988	down
gene17052	1.60189	2.15042	2.28519	0.263311	0.0958522	0.145536	down
gene18078	8.25093	8.54751	9.20505	0.218829	0.413254	0.134484	down
gene1563	4.88402	7.00703	4.68019	26.2066	23.3869	29.3858	up
gene35317	0	0	0	2.59646	2.60246	1.29376	up
gene17579	17.7891	6.94181	8.97889	1.95836	0.916483	1.45903	down
gene31425	0.774846	1.23146	0.852868	11.5442	9.59	10.5547	up
gene1309	15.5097	14.1234	14.5027	2.28524	1.94972	1.99548	down
gene4876	2.51932	4.00294	3.4229	0	0	0	down
gene22607	17.3956	9.61873	13.5586	0.64783	0.789069	0.605208	down
gene11417	3.32532	6.64179	5.10851	0.502611	0.745659	0.208319	down
gene7642	5.15624	5.29826	5.05871	1.14713	1.56123	1.07613	down
gene38274	5.51544	4.64588	4.9069	21.9715	21.4081	24.398	up
Walnut_newGene_5150	0	0	0	2.12996	2.17296	1.90461	up
gene3842	1.58044	0.852799	0.781602	0.0615153	0.146681	0.16667	down
gene29019	0.566238	0	0.135037	2.6988	2.32381	1.61904	up
gene40551	109.89	103.659	110.108	14.985	14.3997	13.4215	down
gene14382	1.12671	1.72316	1.40162	0.501592	0.310848	0.761999	down
gene24932	0.324668	0.366072	0.234936	2.96673	3.48697	2.72429	up
Walnut_newGene_1147	0.872247	0.738676	1.10176	0.0635284	0.123304	0.06752	down
gene10718	3.54393	1.90471	1.72639	0.331279	0.591589	0.406776	down
gene4775	5.12926	3.05642	3.35025	18.191	22.7872	24.5219	up
gene27278	5.87769	3.51037	3.89223	0.13864	0.130873	0.114469	down
gene16810	14.358	8.79071	8.84565	68.014	66.4242	71.797	up
gene34215	1.88383	1.47135	2.07648	0	0.0853546	0	down
gene27809	4.47571	3.20984	4.72198	48.294	43.3049	45.2875	up
gene28833	24.0105	34.6063	35.2431	5.15566	6.11756	4.48409	down
gene4060	3.56869	2.53036	2.14896	0.588799	0.808723	0.28464	down
gene29867	15.4587	13.6254	15.2805	2.93071	3.30139	2.51748	down
gene8913	5.46048	4.84682	5.67825	1.50354	1.18409	1.38467	down
gene27878	8.81473	11.9291	12.0581	2.65524	2.5874	2.74119	down
gene22071	0	0	0	4.05266	7.02204	6.04814	up
gene38696	9.20257	9.0357	8.9304	1.29495	1.35414	0.670362	down
gene33035	16.4303	17.3584	17.5633	2.25482	2.02846	1.67671	down
Walnut_newGene_5500	0	0	0	1.10362	1.0125	0.54613	up
gene138	5.83127	7.1305	7.9329	1.40898	0.83705	1.12617	down
gene37048	208.018	210.046	207.942	36.0393	34.2581	40.128	down
Walnut_newGene_4396	2.81885	3.31708	3.10586	0.406679	0.23406	0.486025	down
gene25544	36.031	51.9834	48.9071	12.1368	8.63101	10.9655	down
gene30972	1.69441	1.05737	0.740233	0.237095	0.069682	0.19828	down
gene40880	2.12669	1.68953	1.48946	0.193841	0.167962	0.0906564	down
gene13516	0.289851	0.617057	0.293413	13.3967	11.2559	11.2287	up
gene21581	2.38249	1.56034	1.44599	0.349418	0.142575	0.108705	down
gene7025	2.05988	1.40363	1.29391	7.63767	7.45845	8.50929	up
gene31084	1.9146	2.20185	2.14497	0	0	0.0674978	down
gene27547	5.09934	3.65222	3.47341	23.2414	24.9606	21.7041	up
gene41363	2.36613	5.32925	3.74434	0.0247781	0.0471333	0.0534065	down
gene24954	15.5382	15.2922	14.7791	1.09404	1.71488	0.77924	down
gene35905	16.1422	11.4735	11.7046	0	0	0	down
gene23609	0.0188176	0	0	4.00244	3.63543	4.29612	up
gene11148	1.0652	1.00672	1.04509	0.325099	0.186534	0.137746	down
gene9619	4.21812	3.54898	2.61879	0.346767	0.162962	0.11017	down
gene30206	0.789039	0.391364	0.807816	0	0	0	down
gene24207	0.100668	0.0871074	0.0946533	4.5503	3.73802	4.09636	up
Walnut_newGene_6846	2.92375	4.27147	3.37753	0.648821	0.296737	0.453543	down
gene11883	0.674034	0.354179	0.397055	3.16164	2.26336	2.47594	up
gene21840	3.99322	3.43204	3.071	151.035	159.278	170.767	up
gene6960	0.0686651	0.0431623	0.0702959	0.847702	0.495072	0.453421	up
gene12279	3.50895	4.85657	4.2384	0.765649	0.602901	0.50069	down
gene20342	0	0	0	2.67674	3.74521	2.51761	up
gene22525	6.78165	7.17266	6.88709	1.09779	1.60243	1.4766	down
gene37160	1.5031	0.838827	1.69119	0.298873	0.157097	0.310598	down
gene12072	7.44162	5.95996	5.93962	0.430388	0.731832	0.801668	down
gene14243	14.1182	10.7538	10.8677	3.03684	2.50248	2.47792	down
gene21126	116.384	111.083	108.746	23.6436	23.228	26.1951	down
gene31197	11.5254	16.3382	14.6643	2.44511	1.71551	2.25688	down
gene27497	0.0318668	0.059094	0.0322554	0.649422	0.424735	0.807787	up
gene8586	2.0777	1.35843	1.58984	0.126016	0.234928	0.133995	down
Walnut_newGene_247	6.89264	9.77211	12.2329	0	0	0	down
gene6147	51.4305	61.3934	60.2733	6.87805	7.01968	7.47645	down
gene41144	0	0	0	3.69953	3.15406	3.1291	up
gene34217	6.0304	9.43285	8.58596	0.519351	0.409734	0.35862	down
gene13048	12.6232	13.4435	13.3702	3.33637	3.39378	2.95451	down
gene14864	0.178699	0.0826513	0.181503	2.69442	1.24761	2.74934	up
gene24076	6.35519	13.8	12.676	0.284196	0.133733	0.181674	down
gene32549	353.428	494.358	552.116	0.146104	0	0	down
gene16033	46.8562	51.4849	50.7302	10.3969	9.44033	9.07249	down
gene26666	3.95567	16.2596	17.5637	0	0	0	down
gene5782	1.69138	2.49272	2.81165	0.198082	0.46613	0.210992	down
gene40944	9.81335	6.0713	7.21402	2.13225	1.44852	1.88988	down
gene7641	5.02031	2.24388	2.53475	40.1983	38.9905	37.6699	up
Walnut_newGene_6580	0	0.232646	0.30184	1.40376	2.14787	1.80142	up
gene13844	0	0	0	4.25625	5.34209	5.89452	up
gene12664	9.67058	6.95449	6.308	0.701493	0.96642	1.29071	down
gene5553	0.193186	0	0	2.0243	1.72737	2.27676	up
gene39048	2.592	1.56666	1.3193	0.0630675	0.147202	0.093257	down
gene17190	81.4656	117.985	129.657	0	0	0	down
gene6969	0.548251	0.311757	0.291589	8.23738	8.83458	9.26574	up
gene21971	0.401036	0.1754	0.241194	3.36476	2.70281	2.93246	up
gene14964	150.126	77.3862	68.8137	7.06954	11.0162	9.93622	down
gene29494	0.34765	0.279284	0.219002	0	0.0124419	0	down
gene2838	96.6485	114.21	114.666	3.00021	2.61482	2.81896	down
gene16451	0.98674	0.832307	1.05008	0	0	0	down
Walnut_newGene_6696	9.35082	19.406	14.6217	0	0	0	down
gene8883	4.45349	7.71931	7.20564	0.118416	0.0560453	0	down
gene27096	0.0323421	0.0606749	0.198124	1.69722	2.42672	1.95077	up
gene3149	22.8402	26.8696	27.0364	3.02702	2.99873	3.92299	down
gene15943	45.0796	35.4034	34.592	0	0	0	down
gene5569	1.25877	1.63198	0.887137	24.362	25.5021	31.713	up
gene13487	10.2134	9.76363	9.38679	0.0894396	0.147353	0.167105	down
gene28044	1.32842	1.00599	0.650432	0.0237262	0.0453071	0.0509376	down
gene11127	0.0647665	0.181568	0.360948	3.26666	4.10664	3.82638	up
gene13256	61.5704	27.6348	24.6769	3.36944	3.35875	4.13505	down
gene28932	2.96758	2.77547	3.05825	0.361027	0.168365	0.115699	down
gene23129	0.0662105	0.0922406	0.101118	9.85243	8.29176	7.43008	up
gene26683	1.42303	1.56898	1.53627	0.236927	0.311186	0.389131	down
gene7030	3.86554	2.48921	2.17848	0.269906	0.82442	0.486122	down
gene16578	0.888643	0.886106	1.22604	0	0	0	down
gene20870	1.26504	2.0105	2.15137	48.9193	45.6436	44.6787	up
gene42119	6.99482	7.1097	5.26106	0.613588	0.924958	0.56161	down
gene27867	2.20316	1.8556	2.29632	0.369829	0.239039	0.0449747	down
Walnut_newGene_381	2.97708	5.18258	5.46537	0.0201391	0.0581286	0	down
gene4454	11.0544	9.62595	10.7234	64.097	60.4149	61.0168	up
gene9717	9.66684	9.30091	8.26002	0.121072	0.282502	0.127365	down
gene34992	4.18671	4.54255	4.13282	0.41059	0.623433	0.644332	down
gene13438	41.3289	67.6039	63.1543	4.01123	4.12142	3.46106	down
gene6567	0.776096	0.755756	0.752094	9.06963	9.37804	8.85491	up
gene1711	4.98493	4.5536	3.77997	0.0392046	0.0525842	0	down
gene29780	5.57117	9.39572	9.53146	0	0	0	down
Walnut_newGene_4142	0	0	0	0.220967	0.401423	0.277117	up
gene40307	23.0285	33.132	32.8369	0	0	0	down
gene1379	1.01336	2.26301	1.97189	0.0697783	0	0	down
gene12448	1744.6	2649.01	2588.96	59.6535	76.129	76.5407	down
gene37844	44.0398	59.361	54.135	8.68385	11.4599	9.82042	down
gene21404	0.507677	0.195723	0.241996	1.38227	1.31434	1.59548	up
gene35050	234.474	275.348	286.458	5.32453	6.70664	6.43755	down
gene23813	186.077	37.7133	41.7081	0.367414	0.114028	0.192559	down
gene20032	5.5265	6.02798	7.49251	0	0	0	down
gene43288	6.82639	5.48665	5.11808	0	0.077367	0.0886519	down
gene32938	5.79677	14.1555	16.504	0	0	0	down
gene32388	653.562	996.223	987.345	82.2037	71.7812	73.6486	down
gene22937	54.7765	73.7215	78.1433	386.488	471.831	471.088	up
gene14136	0.441096	0.238989	0.633815	0.0303856	0.0729786	0.0330268	down
gene24543	2.81341	2.10533	1.75559	0.784064	0.617695	0.560771	down
gene21649	1.4694	1.82008	1.89757	0.0440531	0.105064	0	down
gene29581	0.0758513	0.141772	0	10.8184	7.74311	8.08234	up
gene27703	1.72636	1.11121	0.742533	6.42666	7.55681	6.47994	up
Walnut_newGene_1409	1.21405	2.30003	2.16547	0	0	0	down
gene17045	2.97133	4.55654	4.53812	0.546651	0.301516	0.435963	down
gene23808	0	0	0	13.1485	13.1749	12.2667	up
gene38326	33.4925	35.5472	36.1838	444.755	331.952	341.442	up
gene30638	39.8817	44.5884	41.523	9.17328	9.42911	10.629	down
gene6011	4.24977	5.22508	5.33624	66.1664	68.6208	67.1022	up
gene26341	15.8327	13.898	11.376	66.9023	64.854	65.8967	up
gene8316	6.67032	4.40219	3.88099	0.717855	0.795587	1.10454	down
gene39221	1.17459	2.04934	1.35925	0.510007	0.284152	0.636238	down
gene16968	5.59558	6.15766	5.81679	0.390703	0.585144	0.127157	down
gene42780	16.0552	28.7451	29.0113	1.83277	1.7016	1.62253	down
gene13766	3.49643	4.57478	4.09978	0	0.153208	0.0859935	down
gene11418	1.93647	1.26591	0.782187	9.1572	8.58202	9.80426	up
gene7463	632.742	1550.94	1571.7	53.9557	49.0209	51.859	down
gene22840	246.755	237.658	223.033	23.9547	25.2817	26.0297	down
gene8397	10.9818	6.82109	5.50432	0.0860001	0.377195	0	down
gene21666	0	0.0214171	0.0464762	2.46042	1.93288	2.11094	up
gene39768	4.82966	7.37524	6.62457	0.951078	1.14905	1.1267	down
gene34163	29.8374	24.5773	21.7123	0	0	0	down
gene26569	0	0.0230208	0.0251374	1.68496	2.25861	2.14966	up
gene31557	1.0041	1.23852	1.93475	44.6849	29.4473	29.3578	up
gene42365	13.0174	6.29584	6.74817	0.748378	0.677131	0.640105	down
gene8261	0.896301	0.0763162	0.371801	3.91251	3.58595	4.36198	up
gene1569	25.3208	31.6463	30.5967	2.60501	2.36262	2.17474	down
gene42282	28.5592	16.949	15.4468	0.43134	0.0998941	0.111686	down
gene3486	12.8282	13.553	14.4354	2.78472	2.71206	2.85128	down
gene16257	0.65051	0.22261	0.17504	1.47126	1.79002	1.50034	up
gene33630	18.2732	60.1566	56.5683	2.01553	1.99464	1.64944	down
Walnut_newGene_7323	25.1169	21.8715	16.8464	0	0	0	down
gene23350	34.4532	31.2539	28.3686	4.1173	2.63492	3.46836	down
gene40065	0.657983	0.408014	0.223684	2.92363	5.50944	6.48395	up
gene38622	15.1206	23.5681	25.4774	0	0	0	down
gene11140	5.13004	5.02823	4.31534	0	0	0	down
gene41559	1.46076	0.772887	0.939831	0.249257	0.0435065	0.171012	down
gene16390	2.03765	2.18337	2.12877	0	0	0	down
gene21811	0.379794	0.203142	0.220346	6.27498	5.86624	5.36854	up
gene10827	7.41812	4.45529	3.35159	0.315064	0.789225	0.393221	down
gene16192	59.4083	93.2637	92.9154	17.17	15.6026	16.8745	down
gene27884	21.4098	17.4384	17.4365	126.414	110.78	116.38	up
gene34101	21.4568	21.4534	21.7815	1.98765	3.54204	3.88758	down
gene15636	4.5021	12.9563	13.4319	0.195757	0.116811	0.178059	down
gene1097	11.6539	12.4538	11.82	1.76303	1.39187	1.74016	down
gene12151	1.0415	1.01504	1.442	27.8789	21.2586	19.8713	up
gene25056	35.2875	49.1877	48.8008	0	0	0	down
gene10342	0.155095	0.332116	0.260897	4.07319	4.17422	3.26798	up
gene23159	0.931915	1.39026	1.44619	0.0608342	0.114035	0.0321617	down
gene13550	2.99036	2.5084	2.0956	0.148199	0.125257	0.0528225	down
gene10390	0.380496	0.277749	0.356754	2.36124	2.05295	1.80801	up
gene6687	1.06171	2.00129	1.252	0.128981	0	0.0696193	down
gene39344	10.1954	6.99179	7.75935	0	0	0	down
gene21312	1.25674	1.099	1.2586	0.0710365	0.0170247	0.0192274	down
gene26475	70.2085	51.0188	50.1908	0.585269	0.747809	1.04053	down
gene37012	3.48608	3.17458	2.57017	0	0	0	down
gene14599	28.0808	23.0531	22.9131	0.189999	0.4058	0.430828	down
gene42213	7.85543	5.03617	4.21567	0.296466	0.208551	0.356302	down
Walnut_newGene_3543	8.86007	7.64083	9.01819	2.40278	2.05778	1.67076	down
gene23028	0.185044	0.10986	0.187483	1.32565	1.29147	1.87749	up
gene40723	5.90045	3.26589	3.77597	17.5741	19.8304	22.0604	up
Walnut_newGene_377	2.5386	1.4951	1.66302	11.3395	11.7394	11.491	up
gene22834	494.453	586.104	634.01	33.0127	26.436	27.2703	down
gene23282	3.05043	1.49419	1.38129	0.065623	0.236738	0	down
gene26294	1.70549	1.01446	1.29029	9.37468	19.2218	19.0755	up
gene39437	27.7885	26.283	27.1356	7.6396	7.6758	8.46465	down
gene41060	0.534562	0.469614	0.147667	1.35316	1.13399	1.64036	up
gene38845	7.35233	7.00356	6.57587	127.757	123.54	133.767	up
Walnut_newGene_6293	2.22988	2.1142	2.41881	0.489163	0.4211	0.769061	down
gene20188	1.202	1.12116	0.789905	0.124584	0	0.0443219	down
gene6219	13.1184	17.6968	15.5931	3.03907	2.44423	3.00109	down
gene31558	19.42	18.4304	16.8633	3.58347	2.8804	3.67554	down
gene35858	1.60391	1.72381	1.9284	0.071754	0.220976	0.125834	down
gene22388	1.16586	0.50949	0.454617	0.0271363	0.0519818	0.0291034	down
gene15875	4.69457	2.54797	3.04715	13.485	15.5218	15.3542	up
gene1638	3.65904	6.50661	8.426	28.1029	31.5757	32.4192	up
gene42238	43.0567	24.8365	27.2777	0.691324	1.25473	1.01756	down
gene26955	21.697	13.2438	12.5384	0.211315	0.303619	0.401893	down
gene14002	0.294334	0.264707	0.18032	2.01915	1.83576	1.94453	up
gene24767	37.6719	18.6558	13.6068	0.225409	0.626738	0.23803	down
gene704	115.723	104.144	102.213	17.4087	15.1118	15.5094	down
gene5518	1.03154	1.18884	1.98574	0.041978	0	0.0863196	down
gene34840	0.55109	0.213145	0.286353	0	0.0276184	0.0155922	down
gene8683	3.60201	2.04812	1.96097	0.162344	0.312118	0.229145	down
gene4911	0	0.0353672	0	0.520631	0.199046	0.380236	up
gene36310	27.2892	35.7975	34.8142	0.0964924	0	0.051328	down
gene33515	16.868	9.1453	7.75734	90.3853	82.481	84.9047	up
gene29302	2.24093	1.30737	0.863867	0.150668	0.105428	0.159589	down
gene39056	9.61828	12.8167	18.2038	2.32817	2.77651	2.47003	down
gene6328	1.83935	1.03755	1.40391	0.101831	0.28527	0.215018	down
gene39073	3.44196	5.88878	4.64929	195.574	151.409	169.454	up
gene897	56.0327	65.6867	63.1541	406.543	390.384	382.383	up
gene14107	1.43918	1.97733	2.85057	0.229112	0.138527	0.208203	down
gene17257	1.04085	0.840728	0.265043	0	0	0	down
gene23521	90.4949	112.625	107.771	465.833	421.162	422.181	up
gene41249	1.40889	0.826322	0.789846	0	0	0	down
gene20621	0	0.106967	0	36.3303	31.9655	35.681	up
gene42017	1.86604	1.05917	0.945512	0.091988	0.130077	0	down
Walnut_newGene_121	0.0417363	0.0309664	0.333163	3.16903	2.98595	2.90047	up
gene6298	7.03696	4.188	4.59683	0.843641	1.38676	1.3385	down
gene24552	10.809	9.94553	10.5169	0	0.0442612	0.0499217	down
gene27272	9.34871	6.43114	6.98875	0	0	0	down
gene31243	4.22626	2.95964	1.58569	0.256295	0.248351	0.141142	down
gene5964	31.8279	31.667	32.0756	3.78324	4.64001	5.03079	down
Walnut_newGene_1910	16.6966	23.3234	22.3626	0.125012	0.416418	0.156994	down
Walnut_newGene_944	2.5379	2.36129	3.03489	22.6302	22.962	23.2142	up
gene19058	2.67148	2.26571	2.96335	36.4084	44.0744	36.9209	up
Walnut_newGene_5917	4.45025	7.20132	8.09071	1.61998	1.44743	1.62019	down
gene13361	9.55936	12.5543	11.9082	1.28279	1.75922	1.27349	down
gene12390	828.371	1669.91	1590.16	235.916	226.07	229.293	down
gene12534	6.66933	9.02734	8.85148	1.3595	1.15898	0.742624	down
gene1639	2.97747	31.1466	45.7134	0	0	0	down
gene28894	17.0782	12.67	14.827	1.51235	1.85986	1.13367	down
gene30346	2.05091	2.39348	1.90943	0.159388	0.150444	0.666944	down
gene39991	10.9059	9.91404	10.5093	135.309	136.429	128.554	up
gene14290	0	0	0	2.14454	2.09782	2.42806	up
gene34891	1.21554	1.93144	1.96499	0.222927	0	0	down
gene41021	9.84442	9.95822	8.77904	0.0374909	0.127908	0.121035	down
gene32104	6.26628	7.39297	6.82313	52.8766	53.866	51.4987	up
gene2270	8.92338	9.03663	9.48317	0.713582	0.796055	0.950803	down
gene2737	4.00983	4.17838	4.53872	17.4899	17.5389	18.4831	up
gene30544	0.437316	0.260814	0.223893	0.0140002	0.0399681	0.0150149	down
gene1783	3.99301	4.86075	3.95474	0.176046	0.174446	0.474745	down
gene8874	14.5683	12.4981	12.7033	69.3875	59.372	68.5359	up
Walnut_newGene_1179	2.62599	1.57971	1.84319	0.436836	0.275992	0.624815	down
gene32153	2.88794	4.2042	4.10855	0	0.0423219	0	down
gene29358	7.82836	6.76843	7.327	81.7348	90.8665	94.2646	up
gene27396	1.39778	1.07039	1.55236	0	0	0	down
gene3570	21.1501	19.9941	23.6663	1.56795	1.86422	1.30583	down
gene41003	5.94048	5.66339	5.23923	0.904154	0.946229	0.682643	down
gene37752	26.9446	22.156	22.375	0.935956	1.32565	1.34788	down
gene22028	4.29234	6.01525	5.58919	0	0	0	down
gene580	9.18035	9.96282	8.72518	0.686455	0.612303	0.843585	down
gene1637	73.7593	95.4482	107.837	22.4663	22.2799	21.7441	down
gene27846	0	0	0	1.77928	1.25173	1.67831	up
gene36096	2.82217	1.1912	2.1973	0.303321	0.548491	0.389372	down
gene32581	0.646155	1.32423	1.02992	0.0445458	0	0.142262	down
gene12663	15.3011	13.4663	14.1467	63.2116	61.9392	63.1419	up
gene20998	4.60862	4.69093	5.07184	0.229864	0.147548	0.582827	down
gene25467	5.92275	6.74253	7.3203	0	0	0	down
gene38143	34.8252	38.4983	36.9348	0.704418	0.76845	0.806329	down
gene24418	3.07001	1.84598	1.83479	0.398379	0.496931	0.692808	down
gene31106	0.174223	0.332903	0.893083	3.41471	1.41497	3.92243	up
gene42020	21.5657	11.1707	12.7833	3.89251	2.98496	3.10886	down
gene1707	3.235	2.65992	2.3545	0.666313	0.734598	0.632709	down
gene1144	14.4213	57.5948	60.6006	0	0.0396128	0	down
gene10416	0	0.0377488	0.163639	1.44903	1.58358	1.36411	up
Walnut_newGene_1199	2.00153	3.31458	2.16514	0.650805	0.566657	0.832524	down
gene29855	7.11379	6.02675	5.35765	1.38201	1.2135	0.792168	down
Walnut_newGene_6769	0	0	0	2.14987	1.90598	3.92268	up
Walnut_newGene_1662	0	0	0	4.39981	4.78413	3.29674	up
gene7895	16.6914	18.7822	21.9866	0.0432493	0.0396538	0.090154	down
gene25137	30.8908	43.5841	44.4547	0	0.161391	0.212348	down
gene31039	5.79544	16.3624	14.7248	1.0736	0.768832	1.16257	down
gene10670	0.255621	0.334851	0.313095	13.0627	10.8932	11.7281	up
gene28702	2.63939	1.53748	1.20473	0.0545929	0.153072	0.144135	down
gene33065	0.59425	0.732778	0.703663	0.0269333	0.0512468	0	down
gene6529	0.504849	0.55957	0.430518	12.9117	12.1283	10.9989	up
gene23496	16.3854	8.27884	7.96994	0	0	0	down
gene5384	10.2826	9.3547	8.15735	0	0	0	down
gene31964	1.12922	1.42869	1.47448	0	0	0	down
Walnut_newGene_1845	2.66089	2.73996	2.77642	0	0	0	down
gene14511	24.5201	43.6002	41.1433	0	0.0306992	0	down
gene5400	0.816847	0.894602	1.01281	7.72918	8.16899	7.25824	up
gene15615	4.372	11.7587	11.8829	0.970102	1.46582	2.01922	down
gene32948	21.6905	12.6213	11.4828	0.985778	0.804543	1.24737	down
gene39145	2.56612	1.37733	1.97758	0.051728	0.196963	0.0554759	down
gene34484	18.2358	29.3072	28.4571	0.0528844	0	0.166002	down
Walnut_newGene_354	0.16654	0.0942913	0.203026	1.0736	1.47957	1.63897	up
gene32835	1.39792	2.04499	1.95593	0	0	0	down
gene30216	0	0	0	7.53116	7.17098	4.85586	up
gene1147	7.43357	6.22661	5.80949	0.905425	0.595008	0.914361	down
gene12166	2.71406	4.03991	8.81732	0.495812	0.234371	0.264803	down
gene12732	2.7898	1.03696	1.19617	0.041861	0	0.13477	down
gene40635	15.1541	17.9304	17.9617	312.45	335.604	363.064	up
gene5738	12.8295	23.3822	28.9192	365.056	310.524	321.635	up
gene22286	0.164251	0.0553857	0.239707	13.0535	12.2797	12.1298	up
Walnut_newGene_3428	0.00554103	8.64457	0.000412445	56.3879	35.3911	51.31	up
gene40174	89.1083	102.926	102.86	17.6545	15.7238	16.8508	down
Walnut_newGene_3248	5.0929	8.82968	4.23844	38.2716	34.6354	29.9172	up
gene27679	2.74127	1.38283	1.59411	0.236953	0.0899489	0.305724	down
gene22082	0.900139	0.370751	0.657585	0.140331	0.052206	0.141833	down
gene19619	0.0998099	0	0	3.70865	3.90678	2.89651	up
gene30177	6.42579	5.4562	5.25546	1.06847	0.969031	0.797136	down
gene38552	3.45557	5.57749	7.2311	0	0	0	down
gene5588	36.6749	47.0345	46.8444	12.136	10.8124	10.0234	down
gene40959	17.7328	23.4331	24.8632	0.841274	0.838953	0.446312	down
gene14295	2.10325	1.21223	0.944731	0.133505	0.127439	0.144547	down
gene24607	1.57992	0.995749	0.554028	7.23715	7.55914	7.85166	up
gene20995	3.17844	2.2238	2.58547	0.0400427	0.10178	0.163741	down
gene30956	3.15122	15.3849	14.3091	0	0	0	down
gene9379	1.6038	2.11426	2.1766	0.0545977	0.289678	0.354897	down
gene20948	0.976264	0.490569	0.988834	0	0.0337272	0	down
gene14666	4.06631	1.61759	2.12984	0.100796	0.28425	0.107107	down
gene41290	26.5233	35.4398	35.983	1.04219	1.62797	0.924047	down
gene16300	1.18631	0.953435	0.807681	0	0	0.0331785	down
gene37890	0.234133	0.227201	0.252992	2.79122	2.28777	1.99382	up
gene15519	3.56341	4.28303	3.89073	0.261217	0.386972	0.525416	down
gene35882	2.35544	3.69399	2.86705	28.6583	32.9862	30.9557	up
gene6722	89.9531	162.408	166.741	5.30494	7.49241	7.96672	down
gene37103	4.44447	3.7909	4.93712	1.01374	0.964972	0.633066	down
gene37006	2.99392	1.75777	1.44542	0.251965	0.303508	0.237198	down
gene5755	29.7555	36.8552	43.5958	2.59585	1.59146	2.69528	down
gene28843	4.61755	3.46028	2.60906	0.315894	0.437733	0.263389	down
gene30297	36.7192	35.8839	32.34	6.87198	10.0895	7.4319	down
gene26363	3.75923	3.12239	3.29566	0.550634	0.566957	0.452896	down
gene7201	598.337	645.767	697.926	0	0.247131	0.140123	down
gene32511	2.51815	1.35469	1.16757	0.138934	0.0666444	0.274952	down
gene13594	3.2075	2.08058	2.06401	0.739049	0.520013	0.758337	down
gene14051	1.57355	0.71879	0.879349	0.0637946	0.274672	0.130421	down
gene27149	8.21398	6.27207	7.04555	0.42657	0.452277	0.498057	down
gene2763	15.2778	20.0273	18.3951	0.615128	0.750778	0.971201	down
gene7780	13.9433	12.8559	10.5277	96.8463	77.1878	84.4415	up
gene24811	0.885215	0.523111	0.766513	3.32725	2.76025	3.01637	up
gene22287	0.674581	1.27084	1.16114	10.13	8.52373	8.7058	up
gene26203	2.80357	2.28217	2.23663	0.365442	0.486599	0.309652	down
gene3226	3.57989	3.18687	3.39932	27.3085	26.4757	25.6818	up
gene32339	9.42735	10.503	10.3102	0.665747	0.8553	0.850552	down
gene12730	5.66242	6.11424	6.25422	1.03772	1.74685	1.35234	down
gene1538	48.6489	47.2799	46.4619	10.0851	9.95848	13.341	down
gene15275	8.28993	3.51854	3.38881	0.0440269	0.0906592	0	down
gene13092	0.520483	0.352348	0.228471	16.0164	11.7251	9.82828	up
gene26259	7.65695	7.67937	6.0648	0.435025	0.47833	0.554969	down
gene27169	0	0	0	77.5422	65.3604	70.875	up
gene8082	17.9316	14.4135	11.0477	0.225516	0.107808	0.121691	down
gene10631	23.2056	19.7078	15.9726	4.56622	5.72154	4.23993	down
gene19493	1.71819	1.59124	1.60822	0	0.0683996	0	down
gene11211	10.1563	10.1519	10.3944	1.47954	1.72784	1.83631	down
gene40675	1.10988	0.974899	1.02644	7.42514	8.40401	7.50203	up
gene33494	26.212	34.6509	34.5792	7.68721	7.80552	6.74445	down
gene42707	0.571554	1.65793	1.263	0	0.053626	0	down
gene21842	0.0452786	0.0208342	0	25.2323	24.2011	24.7667	up
gene13486	2.87705	2.21091	2.40495	28.9267	23.2552	24.7674	up
gene23847	4.3788	1.61933	2.36969	0.272613	0.109727	0.0829194	down
gene29629	20.4176	20.4092	22.4485	2.91732	2.94659	2.88552	down
gene16065	1.12549	1.35218	1.3157	0.352561	0.405895	0.139544	down
gene40544	17.9988	13.5169	12.5615	0.40266	0.694701	0.545998	down
Walnut_newGene_1746	0.188509	0.312805	0.219663	2.9319	1.88976	2.31775	up
gene36858	16.1566	15.7762	15.4656	0.201053	0.258116	0.29002	down
gene17015	0.85073	1.08712	0.934886	0	0	0	down
gene16924	3.38941	2.5696	2.58026	0.0358325	0.135449	0	down
gene28405	4.85307	2.52187	3.01658	0.220038	0.566971	0.476841	down
gene39506	0	0	0	1.48633	0.979384	1.0329	up
Walnut_newGene_4454	31.3333	27.5263	37.5785	0	0	0	down
gene13880	31.5734	26.8787	23.4905	0.481634	0.253411	0.144571	down
gene36934	2.67713	3.57795	2.81362	0	0	0	down
gene20068	0.0834525	0.231377	0.169127	3.89342	2.34881	2.8373	up
gene33066	13.6699	6.7467	6.11966	0.171512	0.486957	0.417187	down
gene28540	164.504	189.798	170.276	15.5486	12.5759	12.9419	down
Walnut_newGene_491	2.69308	4.93888	4.77051	2.93967e-71	3.54426e-17	1.53497e-46	down
gene40371	49.8977	123.178	125.639	596.746	698.425	758.051	up
gene29378	0.973182	1.05911	1.35081	0.151855	0.342201	0.228096	down
gene34962	3.23108	4.03311	2.86317	0.507729	0.858102	1.08312	down
gene8911	0.32313	0.226857	0.0934718	11.1046	10.8596	10.9839	up
gene11172	137.675	161.996	173.408	32.4965	34.849	34.325	down
gene7974	2.12999	1.86004	1.16941	0.114386	0.180527	0.0815446	down
gene38061	6.38578	10.6464	10.6515	0	0.521294	0.296175	down
gene4508	4.92772	8.05257	6.17041	0.689989	0.942414	0.574855	down
gene38358	0.310484	1.2584	1.19235	0.0342692	0.0657158	0.0609817	down
gene31782	49.9016	49.4548	46.8279	10.8321	10.6505	10.4555	down
gene36369	7.88837	9.60064	8.71312	1.12948	0.848905	1.19669	down
Walnut_newGene_896	0.752974	1.65808	1.07281	0.12427	0.11976	0.0950483	down
gene22915	4.51493	2.66306	4.88641	0.935569	1.20312	0.677198	down
gene3555	3.18934	2.84479	2.0337	0.481211	0.392034	0.353338	down
Walnut_newGene_5110	0.738648	0.255555	0.511054	8.95646	10.3145	9.97479	up
gene33037	2.31328	1.02242	0.738513	0.0433602	0	0	down
gene34031	1.72708	2.58645	2.59033	0.0517194	0.0789869	0.0592872	down
gene27648	0.350494	0.748082	0.463406	5.1338	4.41173	4.02011	up
gene1321	18.2891	16.5781	15.8804	4.30982	4.23765	4.30931	down
gene253	5.66751	4.72439	4.87975	0.432399	0.654485	0.657077	down
gene3100	8.77134	4.50158	4.89574	0.145175	0.206978	0.0778829	down
gene27344	8.73633	9.2541	8.51214	0.7835	0.811797	0.409523	down
gene29836	0.300225	0.389733	0.500082	0.0171517	0	0	down
gene37215	26.4635	12.9507	16.5261	2.64571	5.62899	3.98451	down
gene6389	0.900709	0.815632	0.608271	0.0192525	0	0	down
gene13731	0	0	0.0414686	150.357	140.6	148.444	up
gene22931	0.194655	0	0	13.7973	13.6546	12.1774	up
gene13230	22.0127	27.6872	29.7988	0.799413	2.21517	2.00789	down
gene38961	0.552051	0.27595	0.159428	1.21078	1.65767	1.45863	up
gene33571	105.409	178.669	164.88	0.45878	0.961895	1.28628	down
gene16201	24.8329	19.419	20.6975	0.869701	1.70612	1.78859	down
gene41699	12.7484	13.8029	14.37	1.97765	1.09769	1.55021	down
gene14742	2.64891	0.692022	1.18246	0	0	0.0657374	down
gene4968	7.33807	13.293	14.9966	2.05134	2.46926	3.2542	down
gene16331	2.74656	2.85998	2.8411	0.163744	0.0904214	0.152075	down
Walnut_newGene_4776	2.10418	0.860075	2.06766	0.233318	0.057756	0.223021	down
gene24613	0	0	0	0.944713	0.799629	0.767049	up
gene31247	19.4147	23.9603	27.7193	0	0	0	down
gene169	0.969998	6.43789	7.49562	382.087	327.634	317.054	up
gene17248	1.95924	1.7113	0.937942	0	0	0	down
gene12576	46.5315	19.1967	19.7316	1.61919	1.66122	1.94709	down
gene14311	8.93932	17.6791	19.63	0.0908089	0	0	down
gene36999	4.00128	2.92595	2.6206	0.100218	0	0.0340823	down
gene18488	0	0	0	14.3464	11.6792	14.853	up
gene43052	0	0	0	9.59974	10.3894	9.40496	up
gene1516	3.16822	2.12849	2.05942	10.5336	9.16678	10.5876	up
gene40776	12.8085	11.7286	13.2923	3.76652e-40	0.000140354	0.000155232	down
gene40404	2.03478	4.98199	4.28947	0.516478	0.284182	0.483007	down
gene9139	25.2432	12.3207	8.23737	0	0	0	down
gene7842	4.47303	6.24531	6.45416	0.191465	0.0666539	0.436569	down
gene20166	0.13964	0.128143	0.0173995	2.47659	2.86724	2.61055	up
gene15313	39.5955	103.579	103.668	0	0	0	down
gene25488	3.11546	2.26809	2.29772	10.1917	11.5866	10.0656	up
gene9069	3.35858	2.52109	2.68648	0.457535	0.575855	0.403583	down
gene28096	0	0.0829189	0	1.20448	1.47712	1.09329	up
gene40685	1.48757	1.03333	0.831851	0.0449043	0.116964	0.0242945	down
gene23755	2.65354	0.828404	1.22979	0	0	0.148636	down
gene33929	17.0162	21.4091	21.7193	0.0540117	0.154944	0.175813	down
gene36699	2.8164	5.11342	4.99539	1.38755	1.23348	0.746722	down
gene9113	2.4424	3.05553	3.5293	0.141545	0.0334945	0.0380202	down
gene28470	1.01625	1.09207	1.20453	32.4931	31.9489	29.1706	up
gene7837	45.9148	65.2064	62.8409	0	0	0	down
gene28717	4.3648	2.93328	3.37781	0	0	0	down
gene27182	0.937945	1.7892	1.8405	0	0	0	down
gene386	2.99225	3.87215	3.06587	0.0654219	0.0311691	0.070297	down
gene12304	2.82588	7.97111	9.8793	164.931	100.415	82.1583	up
gene29640	36.2437	39.1887	39.6742	8.35416	8.44854	9.25464	down
gene26497	27.3522	44.9848	43.6826	2.17936	2.253	2.09643	down
gene31973	4.46816	5.02232	5.30628	0.0873967	0.328911	0.371172	down
Walnut_newGene_6041	0	0.278922	0.340273	1.13787	1.48702	1.43194	up
gene36561	9.92725	7.72953	10.0249	0.120431	0.550258	0.378085	down
gene31268	13.4439	7.20848	6.10486	0.677465	0.580171	0.34378	down
gene5712	2.81252	2.58024	2.24504	0.29257	0.575343	0.389016	down
gene25439	20.3007	23.7961	26.4909	4.58355	5.58207	8.26322	down
gene35632	9.5318	9.29772	10.0473	0.717641	1.29142	0.668408	down
gene35619	1.03455	1.50696	1.47342	0.0303271	0.0288511	0.0977395	down
gene42132	1.94571	1.21842	1.15784	0.278547	0.304159	0.209322	down
gene9388	3.60708	4.31872	4.1901	0.321495	0.305443	0.206941	down
gene29672	0.779347	0.660292	0.784602	3.84701	3.95435	3.76652	up
Walnut_newGene_6945	50.4599	54.1288	51.7114	10.1654	12.3499	13.2588	down
gene24563	7.36536	11.2651	7.99078	2.45394	2.00335	1.98182	down
gene21239	0.668426	1.26052	1.46692	8.08059	4.68202	9.12681	up
gene39879	1.85135	2.83969	2.52701	0.140754	0.128717	0.084416	down
gene38504	1.66201	2.46599	2.05527	921.434	987.798	958.363	up
gene8667	3.3554	6.00313	6.08433	0.173173	0.111357	0.184205	down
gene13765	2.30297	2.23732	1.6156	0.0646133	0	0.0682564	down
gene40014	4.16367	3.24393	3.6848	0.354754	0.326938	0.51121	down
gene42577	36.4294	37.5735	36.3023	0.328009	0.257786	0.407952	down
gene2077	0.706441	0.649038	0.895796	0	0	0	down
gene14198	1.09604	0.861722	1.34053	7.37196	7.51863	6.05714	up
gene16165	6.66158	5.99969	4.84923	63.1487	56.7644	61.7853	up
gene4651	8.04651	8.61882	5.24245	0	0	0	down
gene14865	0	0	0	0.842478	1.02656	1.5089	up
gene12063	0.879748	0.464266	0.472526	0.0783944	0.137579	0.0835108	down
gene1124	5.72572	22.1359	21.449	0.0962879	0	0	down
gene22548	21.7345	20.0394	20.1532	0	0	0	down
gene16124	18.239	16.9284	19.0845	0.184238	0.237537	0.3477	down
Walnut_newGene_5558	6.91399	5.72229	4.77079	0.375873	0.472689	0.695628	down
gene38759	3.61465	1.93244	2.16554	0.368796	0.452107	0.316774	down
gene35629	1.5185	1.79783	1.81243	0	0	0	down
gene16988	1.17753	0.438561	0.574988	3.39893	1.80099	3.82677	up
gene39371	1.5903	1.12088	1.1067	0.124296	0.0767203	0.355677	down
gene15038	0.320728	0.568584	1.02923	7.05996	5.18143	4.59922	up
Walnut_newGene_558	9.77745	14.2652	13.3941	3.09053	2.40997	2.96403	down
gene7131	4.08047	3.40483	3.4039	0.2794	0.295239	0.331056	down
Walnut_newGene_3823	1.5662	1.48642	2.0783	0.163405	0.197986	0.39466	down
gene28007	1.33971	1.00313	0.934697	9.34516	10.5916	11.8506	up
gene24057	4.09222	5.87047	4.28125	0	0	0	down
Walnut_newGene_6162	10.3469	30.5725	24.2857	266.784	242.879	429.92	up
gene29352	15.8043	24.3026	18.2626	0.0540413	0	0	down
gene38974	0.125226	0.236746	0	26.6004	26.4374	29.0448	up
gene29426	1.39378	1.54601	0.970874	63.5032	55.1914	62.2428	up
gene573	3.11836	1.51639	1.84081	0.127051	0.059098	0.198873	down
gene40135	0.0569326	0	0	3.8865	4.87024	3.45945	up
gene39500	10.9585	13.2989	15.3126	0.323466	0.202621	0.113658	down
gene40423	7.25727	5.77064	4.94206	0.0812657	0.176778	0.309224	down
gene41875	1.73548	1.04173	1.08456	0.130997	0.101401	0.056908	down
gene8062	0.274717	0.128548	0.374369	6.45688	4.47306	5.79509	up
gene36968	16.9327	14.9676	16.378	2.52977	3.81651	2.74781	down
gene24809	0.047407	0	0	0.918468	1.21408	1.30971	up
gene30911	0	0	0	0.90841	0.920529	0.532961	up
gene23717	0	0	0	2.41114	2.15493	1.41495	up
gene1575	6.6095	3.44895	4.05681	19.9004	19.2994	19.3307	up
Walnut_newGene_1730	0.179201	0.253689	0.20568	1.17356	1.03614	1.11717	up
gene24988	96.7879	121.355	121.738	20.8387	25.3197	27.1765	down
gene16521	22.0664	19.9906	19.6356	1.66186	2.19125	2.10252	down
gene16050	5.64595	4.24362	4.61982	0.0808695	0.551021	0.264167	down
gene9285	0.161896	0.216982	0.236613	4.72726	3.52437	2.52042	up
gene1272	2.16514	4.87683	5.44846	0	0.0809788	0	down
gene12081	1.5519	2.66325	2.63977	0.0355837	0.164862	0.178003	down
gene32443	0.335758	0.0596024	0.048518	1.03243	0.755228	0.727892	up
gene8774	62.2549	54.3337	55.9449	0.777172	0.956639	0.642838	down
gene7294	0.194465	0.550997	0.198449	2.60492	1.54817	2.4696	up
gene37313	0.632747	0.0906017	0.148612	3.6352	2.27036	2.6862	up
gene31413	1.29222	1.21628	1.51924	0.0429849	0.119011	0	down
Walnut_newGene_5356	11.1319	11.1576	11.4468	2.27793	1.46335	1.4435	down
gene28801	4.65515	2.78352	2.37352	0.292166	0.400267	0.288707	down
gene39960	3.82882	10.9264	11.1139	71.2694	71.5449	78.2257	up
Walnut_newGene_4889	0.339597	0.461392	0.344684	2.55753	2.47982	2.41234	up
gene23535	18.2104	7.90095	6.19	43.3785	49.865	50.4558	up
gene4621	9.78952	10.0938	6.94102	0.735146	0.593818	0.708503	down
gene32276	7.73874	7.31106	5.92635	1.1037	1.50254	1.05545	down
gene40188	178.523	189.003	205.097	1.27636	1.2285	1.62879	down
gene40845	1.16897	0.997461	1.15691	0	0.0926004	0	down
gene8666	3.97279	7.33143	6.78078	0.0899062	0	0.0484571	down
gene30287	68.3475	77.2606	69.3115	16.0556	15.7896	16.4959	down
gene31732	1.11021	0.834201	0.542527	4.45058	4.53474	4.80255	up
gene7675	4.90553	6.76768	5.49496	0.974585	1.51699	1.01919	down
gene24162	8.64102	6.82304	6.42996	0.286592	0.517761	0.417561	down
gene13300	6.67503	2.64264	2.35169	0	0	0	down
gene7288	0.648311	0.959436	1.01852	0	0	0	down
gene7662	5.50415	2.61008	2.23611	0.325196	0.258692	0.269657	down
gene26478	24.009	27.8079	28.4418	3.73129	4.36501	3.98329	down
gene23255	2.89851	5.52213	4.54916	0	0	0	down
gene3314	5.85654	11.5514	12.238	50.5146	66.9781	65.1107	up
gene17825	0.345286	0	0.0872835	2.36401	2.59804	1.71744	up
gene29910	19.1898	41.7637	39.6417	0	0	0	down
gene33898	3.47584	5.99054	5.93547	0	0.161234	0.108026	down
gene16802	26.1556	34.4477	32.895	0.340695	0.537061	0.671335	down
gene16083	1.49094	0.571248	0.647318	0.0240221	0	0.0553415	down
gene1892	1.01488	0.477729	0.589429	5.52981	4.3461	7.89869	up
gene194	2.03524	0.956992	1.52181	0	0	1.73953e-05	down
gene16414	1.07616	0.998705	1.21001	0	0	0	down
gene33826	3.23363	3.85129	3.67933	0.6672	0.769791	0.869782	down
gene38641	2.06722	2.24768	2.21087	12.4033	10.395	13.0311	up
gene14487	11.8554	15.925	14.2631	0.163353	0.200676	0.0965035	down
gene38810	25.581	19.3881	18.6758	1.28135	1.57554	0.855022	down
gene15081	0.842545	1.30368	1.46033	0.0382263	0.326321	0.0816831	down
gene9082	3.57685	3.12968	2.64211	0	0.0729235	0.123767	down
gene8728	9.70058	11.487	12.7081	0.374936	0.545158	0.343684	down
gene35977	2.11915	1.45891	1.83922	0.118816	0.28985	0.175903	down
gene21491	2.69251	2.15093	2.65863	5.68793	8.04367	5.7433	up
gene6030	73.811	44.9249	42.8168	0	0	0	down
gene22087	0	0	0	50.8585	50.8741	49.3539	up
gene15583	17.3707	30.7487	34.8178	196.651	227.941	210.365	up
gene8415	236.812	246.16	253.587	34.7742	35.2449	34.3135	down
gene165	3.60556	2.72725	2.84631	13.5635	10.7411	10.9058	up
gene4896	147.937	118.63	120.865	17.016	13.5787	17.1375	down
gene15964	7.64014	9.0734	8.49125	0	0	0	down
gene35093	0.91197	0.444791	0.607037	0.147865	0.0422429	0.0636009	down
gene5419	36.434	27.2037	23.8252	0.124786	0.463158	1.1533	down
gene12895	0.974667	0.852615	0.928263	0.0661423	0.188818	0.0710539	down
Walnut_newGene_3427	39.438	42.0923	44.6952	203.923	230.013	286.568	up
gene6028	2.69891	2.8601	2.63565	0.288984	0.46325	0.848657	down
gene33394	1.26494	0.631227	1.29842	43.1956	43.2362	45.6431	up
gene21943	271.725	253.866	255.869	14.4614	14.3489	15.0146	down
gene16935	1.62191	1.61174	1.57962	0.443207	0.375023	0.306677	down
gene32736	15.4166	7.37687	6.80946	0.149032	0.220443	0.121463	down
gene41662	48.7395	84.9705	85.5346	1.12443	2.26225	1.5948	down
gene5995	18.6223	16.5056	17.8969	105.364	109.239	113.235	up
gene13421	0.494854	0.07745	0.589753	1.92855	1.6251	2.22086	up
gene7204	9.67506	12.5188	13.1226	1.83749	1.497	1.59097	down
gene8429	2.53159	1.95696	1.60001	0.272654	0.382	0.24388	down
gene13495	117.712	54.1819	51.0506	5.33632e-05	0.912117	0.000183992	down
gene11370	7.03962	6.17847	8.39607	1.3364	1.47266	1.61565	down
gene33477	0.0315591	0.0156685	0	5.69689	5.80141	5.10744	up
gene26838	8.80441	9.74261	9.66912	0.205664	0	0.1435	down
gene35119	5.47406	5.88681	5.99546	0.908837	2.05435	1.58263	down
gene39738	1.36857	0.673901	0.817256	0	0.163176	0.0411639	down
gene42319	22.2433	28.7383	24.9986	200.232	192.084	201.663	up
gene24994	6.80262	6.50855	6.47613	0.51543	0.4311	0.305608	down
gene8093	1.27394	1.29616	1.61387	0.443081	0.304442	0.283844	down
gene22430	310.233	380.785	360.99	7.51912	7.41012	7.13247	down
Walnut_newGene_5592	7.84258	8.45628	4.60684	0	0	0	down
gene26684	1.30276	0.939549	0.78126	0.103777	0.0494884	0	down
gene29794	344.388	464.274	483.589	18.019	19.5937	17.1251	down
gene18073	0.2339	0.198572	0	32.2787	27.6513	29.6302	up
gene39358	0.729293	0.785722	0.659182	0	0	0.0331374	down
gene38342	0.401745	0.409456	0.462065	2.38133	2.39807	2.01411	up
gene5671	5.20712	2.35009	3.91974	19.4797	18.5514	16.1676	up
gene6818	95.7775	89.7247	90.9394	9.53001	11.4202	16.3352	down
gene31734	0.0436588	0.0820214	0	0.841804	0.586854	1.37706	up
gene22567	12.2546	40.4759	41.7765	0	0	0	down
gene21110	0.117537	0.0908906	0.0949192	0.466418	0.719338	0.840834	up
Walnut_newGene_4668	7.66237	12.2011	13.9676	0	0	0.894073	down
gene35623	1.38676	1.13542	1.32369	7.89537	9.00389	8.58503	up
gene36153	2.08573	1.23782	1.29004	0.0961218	0.152782	0.138179	down
gene25868	50.1688	45.9914	53.4239	0.835883	1.0402	0.899434	down
gene15973	4.56584	4.84126	7.67444	0.582917	0.64591	0.440213	down
gene21783	6.87749	5.00302	4.62677	0.363657	0.423249	0.349229	down
gene25411	8.64503	5.38119	5.48959	0.109143	0.172492	0.0386463	down
gene11486	26.8677	42.6382	43.6383	0	0	0	down
gene42759	30.8734	18.3965	18.8315	4.48486	3.47545	2.76563	down
Walnut_newGene_970	0.101536	0.0935847	0.136109	0.881334	0.626016	1.24644	up
gene20863	6.71327	6.30744	4.88763	0	0	0	down
gene30210	1.75456	2.2585	1.88995	0.045004	0	0.0554133	down
gene19332	13.8144	13.3551	17.6594	0.554852	0.683705	0.342203	down
gene36259	44.7639	29.6094	27.0923	2.23783	1.32894	2.84154	down
Walnut_newGene_4747	6.91059	9.1513	9.8985	0	0	0	down
gene14823	26.4262	11.3908	12.4722	0.134718	0.0819634	0.097833	down
gene34473	2.19776	3.48878	3.89205	0.0615938	0.0567223	0.0322742	down
gene12226	13.0609	12.0432	12.751	111.848	105.518	107.878	up
gene36546	0.0965782	0.224115	0.147094	1.15934	1.40904	1.59121	up
gene11908	0.610251	0.715267	0.636898	5.07813	4.6952	3.43978	up
gene11438	2.39228	2.84159	3.03339	15.77	14.3728	12.2011	up
gene15380	0.603772	0.468016	0.422205	1.90761	1.81295	1.87053	up
gene35322	1.54502	3.13016	2.86299	10.9142	15.2174	16.063	up
gene6237	3.68699	4.10173	4.02287	0.22949	0.664482	0.58571	down
Walnut_newGene_6444	1.73854e-06	0.000753249	0	1.05713	3.04474	1.97686	up
gene8355	45.4163	46.613	48.1651	6.5726	6.28629	5.97349	down
gene26201	0.0585004	0.109431	0	4.346	2.9119	3.76469	up
gene40334	3.26942	10.4155	9.92504	1022.3	1002.94	1047.08	up
gene22773	6.55302	5.51017	3.86644	0.968798	0.346815	0.783232	down
gene16004	14.0664	60.8096	56.7691	0.134268	0	0	down
Walnut_newGene_4115	0	0	0	5.89567	5.97114	6.09868	up
gene33023	5.57186	2.86583	3.32427	0.55986	0.812283	0.518059	down
gene11739	6.47308	10.4418	10.101	0	0.102642	0.692175	down
gene38880	4.62911	6.57867	4.18626	0	0.636967	0.286765	down
Walnut_newGene_6055	0	0	0	24.1909	18.833	18.2989	up
gene12142	3.15453	2.73164	1.86843	127.471	115.788	115.55	up
gene41713	0.300055	0.371203	0.26465	5.9267	7.1958	4.91714	up
gene28142	36.868	26.6475	29.3385	3.28542	4.17008	3.91932	down
gene7532	1.99804	1.86628	2.02448	0.197842	0.138667	0.222156	down
gene36712	24.0478	19.0045	19.9041	0.253056	0.695709	0.261009	down
gene38701	0.159428	0	0	8.5454	6.59481	4.64451	up
Walnut_newGene_989	6.24911	6.17387	4.79882	36.1093	42.9223	36.5158	up
gene32061	18.6825	29.2048	28.8661	1.16632	1.55591	1.28005	down
gene24807	9.81538	8.2532	6.45514	0.674616	0.812845	0.549211	down
gene14808	2.70612	4.32581	3.47657	0.11775	0.342136	0.387161	down
gene31543	2.49254	4.45073	5.23935	0.0475515	0	0	down
gene223	2.39865	0.819172	0.859816	0.176044	0.326397	0.294634	down
gene13005	12.9349	5.85145	6.45518	0.787197	1.09209	1.08383	down
gene23238	4.1548	3.5406	2.65284	0.0902301	0.168497	0.0956036	down
gene40218	0.865737	0.724335	0.538406	37.9532	46.2189	55.4138	up
gene32890	6.21698	6.64502	6.28658	0.450809	0.558233	0.353444	down
gene13436	7.67973	13.0491	7.94396	112.396	100.685	115.768	up
gene23856	10.9883	14.3018	14.0634	0.0586752	0	0	down
gene26472	4.68218	8.58298	9.94725	0	0	0	down
gene12479	10.3665	9.61629	9.37133	0.0606126	0.173768	0.283544	down
gene20204	0.242067	1.57013	0.732643	26.1706	19.2291	23.568	up
gene15776	5.01499	5.20918	3.01223	0.43431	0.507614	0.286933	down
gene39210	66.1964	39.8383	40.332	6.95687	7.97329	7.62832	down
gene8013	2.92569	1.6611	2.81028	0	0	0	down
gene38178	1.87944	1.39056	1.02823	15.279	13.1825	14.0986	up
gene21309	0.03664	0	0.0372142	4.48224	8.04305	5.33747	up
gene29549	4.94587	4.88233	4.01269	0.292006	0.289002	0.599097	down
gene37936	0.881354	1.70898	1.24838	8.84387	6.75385	7.89896	up
gene16694	28.3115	30.3134	31.7466	0.0875899	0.0834333	0	down
gene684	0.620874	0.179912	0.145324	3.30858	3.24499	3.59113	up
gene41908	1.27173	1.47984	0.970578	0.104346	0	0.0285076	down
gene25252	51.967	51.9057	50.4349	1.35415	1.4274	1.08515	down
gene29731	14.7276	14.4154	13.2076	0.815356	0.251411	0.188389	down
gene29142	0.080033	0.22935	0.0824544	1.63592	2.01808	1.94101	up
gene11115	16.544	25.7184	28.2152	0.547132	0.397251	0.445445	down
Walnut_newGene_591	0.272495	0.654257	0.400354	8.11068	7.23615	7.57729	up
gene14335	1.79536	1.82509	2.59579	0.227464	0.251555	0.452884	down
gene35725	10.0365	3.76411	3.4904	0.0311524	0	0	down
gene14835	2.26659	1.34068	1.75195	0.0468861	0	0.0504263	down
gene34092	19.5166	7.80679	8.21974	0	0	0	down
gene22204	3.03497	3.26383	2.89339	0.507377	0.715539	0.987941	down
gene32309	10.6758	10.846	11.2997	1.86781	2.03957	1.92502	down
gene12075	2.29776	2.16907	1.74745	0.443575	0.364076	0.309008	down
gene41758	5.92713	6.57252	4.91405	0.393797	1.30603	0.806338	down
gene30397	2.81804	3.9661	4.07435	0.158789	0.0914134	0.0687613	down
gene459	0	0	0	0.717922	1.30016	1.61162	up
gene4769	23.9906	14.0785	14.1984	1.14767	1.96025	2.40515	down
gene8978	3.4717	2.45516	2.51569	46.9721	50.2279	57.8012	up
gene2180	41.9383	42.1384	37.8257	7.90447	8.85367	8.57276	down
gene24309	11.4083	9.89041	8.61931	38.93	40.2329	43.8583	up
gene33835	5.01488	3.74989	3.40312	0.485068	0.628283	0.830376	down
gene15241	5.10122	3.80508	3.64373	1.09134	0.968354	0.522036	down
gene35723	3.68843	5.63134	6.41429	62.2224	59.2194	65.0021	up
gene32971	34.0646	33.0475	38.9083	0.316814	0.17459	0	down
gene41039	3.50406	1.48175	1.44228	0	0	0	down
gene6677	4.24992	6.63741	5.73445	1.35134	1.18171	1.23242	down
gene31662	4.09733	2.73461	2.74295	0.665934	1.00262	0.524321	down
gene35054	1.08319	1.28064	1.07972	0	0	0	down
gene11727	1.05608	1.50933	1.58396	15.1352	13.1206	15.5491	up
gene35988	1.77354	1.55315	1.23973	0.111508	0.0629506	0.0689274	down
gene16028	11.3347	8.15177	8.08355	0.942824	1.30397	1.52241	down
gene20615	0.520798	0.592131	0.335358	0	0	0.0548191	down
gene18773	154.192	166.472	158.227	10.55	12.8029	11.1498	down
gene27534	0	0.169612	0	8.24037	10.3367	8.30965	up
gene21517	2.04727	1.339	1.17894	0	0	0	down
Walnut_newGene_6977	25.9172	17.9015	18.7273	0	0	0	down
gene12417	70.2397	59.6642	58.1344	2.57191	2.74592	3.46365	down
gene5487	169.242	50.8758	47.4997	0.0451381	0	0.420059	down
gene13804	1.47822	1.26099	0.965841	0.162435	0.405188	0.177708	down
gene31799	0.511805	0.598844	0.779899	13.5696	9.88	9.95995	up
gene38248	90.4677	106.483	131.963	4.23407	4.31831	2.99363	down
gene22382	0	0	0	1.92891	2.06315	2.26826	up
Walnut_newGene_4418	0	0	0	1.2664	1.59381	1.05866	up
gene9394	34.6752	39.8447	36.552	169.927	171.73	166.413	up
gene32725	0	0	0	3.1821	3.23826	3.24357	up
gene4390	53.08	74.6484	74.056	773.517	752.933	754.799	up
Walnut_newGene_1731	0.143145	0.118468	0.151804	0.585993	0.99802	0.977917	up
gene10790	4.57733	3.16363	3.67717	0	0.0838596	0	down
gene18876	0	0	0	6.67074	8.82059	9.24109	up
gene15857	3.06678	13.3761	9.72682	0	0.131631	0	down
gene20485	1.71397	1.88892	2.02519	0.538785	0.292966	0.576266	down
gene34508	8.23156	8.53356	9.51194	1.33628	1.386	1.1613	down
gene21357	13.03	10.6783	9.77446	0	0	0	down
gene7888	1.16899	1.63222	0.634686	11.1209	12.31	11.5061	up
gene17442	6.99774	5.53291	7.39711	0	0.492887	0	down
gene39477	9.90369	5.36721	4.34952	0.0168039	0	0	down
Walnut_newGene_4069	0	0	0	2.8231	3.66579	2.95724	up
gene23015	13.1815	12.3546	10.5255	1.11865	1.23339	1.48294	down
gene2226	1.79944	1.3717	1.05879	367.376	342.06	378.501	up
gene30975	0.682346	1.03237	0.815761	0	0	0.0452309	down
gene37943	5.27827	5.23649	4.52032	0.255942	0.213894	0.435627	down
Walnut_newGene_1763	1.36446	3.66725	2.50457	0.463415	0.398941	0.688974	down
Walnut_newGene_2911	5.30811	6.14145	5.50996	0	0	0	down
[truncated: 2,570 more rows]

## Sheet: RPvsNP
The summary of the up and down-regulated in the peel of red and green walnut
Gene ID	NP-1_FPKM	NP-2_FPKM	NP-3_FPKM	RP-1_FPKM	RP-2_FPKM	RP-3_FPKM	regulated
gene3023	43.2264	37.1187	39.8633	9.2654	7.97499	8.12529	down
gene8940	6.83026	3.03513	2.11752	43.0784	32.1968	46.2284	up
gene35072	1.3011	0.790135	0.892213	359.141	180.455	475.955	up
gene21521	4.50425	4.38505	5.37942	1.56687	0.897137	1.22068	down
gene35704	12.7828	11.838	12.8039	65.5791	69.7574	53.7971	up
gene17727	136.946	132.839	127.506	0	0	0.289267	down
gene29936	0.942189	1.61802	2.28816	8.23429	7.56774	6.48095	up
gene4706	0.512502	0.525009	0.449618	0	0	0	down
gene1139	0.264547	0.163016	0.356916	1.43189	1.09638	1.01461	up
gene13967	1.98822	1.15458	1.12586	0.17254	0.0514403	0.425158	down
gene36090	181.385	169.034	178.254	19.7374	53.6546	17.4684	down
gene15858	51.4394	49.3656	53.0298	4.06173	5.03575	3.22343	down
gene36563	6.91986	7.21839	7.30065	0.494078	0.592664	0.567048	down
gene30725	1.38593	1.38517	1.35432	0.100512	0.10423	0.345489	down
gene31353	769.124	798.868	769.316	103.616	100.907	90.358	down
gene8779	20.9855	20.1215	18.7391	0.0794046	0.029209	0.0687716	down
gene35191	0.277538	0	0.445658	2.87714	0.979308	2.80468	up
gene42692	1.13931	1.64036	0.348569	6.54697	7.79193	8.09399	up
gene13333	14.2668	14.5488	13.8297	2.3572	1.91705	2.11379	down
Walnut_newGene_3973	2.92416	2.5534	2.64456	8.50347	9.24276	12.541	up
gene22032	0.568897	0.381518	0.524014	2.64837	2.45636	1.53354	up
gene7736	0.239623	0.460962	0.119765	2.447	1.31611	1.48969	up
gene10094	0.676008	0.901124	0.825337	6.44849	5.39947	6.28921	up
Walnut_newGene_324	3.8e-06	4.09e-55	0	2.07596	0.604173	2.15377	up
gene4793	0.0745504	0.190698	0.324014	5.79115	5.38306	7.13673	up
Walnut_newGene_5891	17.0829	21.7732	22.1594	0	0	0	down
gene40364	98.8418	95.1593	94.6848	2.0917	4.60718	1.57639	down
gene27984	350.064	394.344	395.106	88.7153	101.185	57.8336	down
gene25577	16.824	12.1868	15.6851	66.9022	84.3359	54.7698	up
gene22765	0.039054	0.039585	0.075	0.692149	1.02331	0.471136	up
gene11030	5.57857	8.49159	8.33246	160.778	111.188	155.819	up
gene39966	14.1026	14.9417	15.1973	3.2005	2.33916	1.76851	down
gene42376	1.30352	1.02686	1.06655	0.0646197	0.153929	0	down
gene42439	4.49861	3.02158	3.79498	0.738032	0.813706	0.386695	down
gene23664	0	0	0	29.766	27.9055	26.7031	up
gene16418	16.6996	15.3804	17.3552	2.17767	1.80921	2.03021	down
gene22942	5.19523	4.77257	6.78618	0.220234	0.157027	0	down
gene4955	2.96123	3.56739	4.14145	1.27512	0.793696	0.404844	down
gene1621	5.53671	5.64793	5.88567	0.899407	0.63897	0.706594	down
gene6017	5.25222	4.41296	5.16132	26.5542	27.2021	31.0868	up
gene30873	21.2296	22.8204	20.4448	0	0.0384549	0	down
gene33781	228.475	201.412	215.797	25.0806	41.3315	25.6202	down
gene28113	31.4681	32.2497	35.1843	2.91723	2.67957	3.36576	down
gene13866	0.421611	0.440356	0.64997	4.83382	3.55835	1.79563	up
gene18670	1.28598	1.016	1.37207	0	0.114967	0.0325616	down
gene21944	74.6745	70.1664	70.5172	0.0499443	0.0747221	0.0430732	down
gene27958	7.33714	6.79025	7.07236	0.295821	0.0735508	0.112455	down
gene9710	3.53227	2.87961	3.57304	0.399841	0.66377	0.818425	down
gene40666	1.0407	1.1911	0.822855	0.0482672	0.120371	0.204436	down
gene10700	3.98593	3.25976	2.96001	0.625691	0.543408	0.422829	down
gene32062	29.6388	29.4407	30.959	4.33228	4.11869	1.26447	down
gene5999	0.344567	0.185668	0.093995	0.715028	0.979292	1.30011	up
gene19071	0.656034	0.782252	2.2884	13.414	12.6018	11.338	up
gene33523	0.164508	0.225102	0.289131	12.7267	12.1695	15.7858	up
gene20098	2.00355	2.41658	2.80426	0	0	0	down
gene28270	7.58482	6.8471	7.14851	0.700487	0.21945	1.26846	down
Walnut_newGene_3903	0.267674	0.280975	0.256787	28.4866	32.6676	28.9369	up
gene12172	1.71964	1.04633	1.30865	0	0	0	down
gene31790	20.7205	18.3728	18.7017	3.29588	4.98815	2.39026	down
gene14191	1.8195	1.88345	2.39571	0	0	0	down
gene17385	0.0469185	0	0	3.34327	3.15999	3.76706	up
gene20412	52.1063	58.962	50.1925	6.77002	9.44084	3.42898	down
Walnut_newGene_2731	0.128868	0.268266	0.24861	3.43911	3.33429	4.34588	up
gene31282	1.77368	1.57895	1.13807	0.133888	0.550863	0	down
gene34242	1.30365	1.49093	1.40445	22.8891	24.3954	27.5659	up
gene35713	8.63224	9.30426	7.64431	1.21212	1.54098	0.901958	down
gene20040	1.81138	2.94067	1.80584	11.6143	9.72659	10.9566	up
gene31535	43.0385	40.3281	42.1329	11.1361	7.92249	8.6851	down
gene20031	10.8077	10.6154	10.3647	0	0.271952	0.0533714	down
gene28189	33.006	32.6566	34.3938	182.575	248.981	212.207	up
gene10002	24.9542	23.2246	26.266	4.87459	3.77043	9.16188	down
gene40552	59.7867	62.8474	58.8135	5.85488	3.31194	2.87415	down
gene29185	12.139	12.7221	12.7091	2.64765	2.53306	4.3565	down
gene35491	9.22989	11.5583	9.39298	1.28893	0.657899	0.679349	down
gene7075	5.41824	3.42426	4.74516	0.337949	0.0843282	0	down
gene23578	0	0	0	2.41996	2.43322	0.987843	up
gene5276	12.7254	13.034	12.4257	0.0913655	0.0339614	0	down
gene16353	5.32709	4.28491	6.03158	0.440954	0.280127	0.570589	down
gene25150	138.489	131.06	140.305	21.676	36.8779	15.0586	down
gene27135	0	0	0	1.44118	0.902271	1.8172	up
gene75	0.514165	0.547159	0.428597	0.0854181	0.0957987	0.109317	down
gene4338	0.378397	0.755525	0.31387	69.5234	67.7172	70.9223	up
gene11179	0.123567	0.446007	0.119379	5.324	7.75826	6.89166	up
gene25282	72.0637	70.7022	69.7223	554.195	384.141	612.46	up
gene23815	95.8014	101.495	95.532	0	0	0	down
gene26630	158.747	170.844	174.045	1.93033	1.88009	2.16856	down
gene41459	94.2791	93.3907	94.8562	4.95227	9.25489	3.35229	down
gene35754	3.19642	2.9169	2.0442	0.426405	0.179598	0.363373	down
gene39347	21.4596	20.7487	21.2697	0.279471	1.27495	0.780464	down
gene39489	8.5002	6.56603	6.10012	0.718318	0.894918	0.815984	down
gene24442	4.8509	3.18214	2.84699	0.0659739	0.0973255	0.231942	down
gene3571	0.870574	0.613679	0.828564	0.173158	0.0908278	0.12182	down
gene7433	50.4198	47.4585	52.1916	1.25751	0.833248	0.707803	down
gene30983	4.05531	4.30618	3.89076	77.9519	81.7831	73.0184	up
gene25021	0.132403	0.0923862	0	0.722594	1.21328	1.24523	up
gene36001	0.125641	0	0.302566	2.56853	1.55849	1.72737	up
gene25332	0.376491	0.403496	0.118198	3.90544	1.51708	2.40758	up
gene36691	13.3139	13.874	5.64288	0	0	0	down
gene32176	146.077	151.299	148.766	14.8005	37.6858	9.18878	down
gene38325	2.75944	3.03822	1.59236	0	0.066845	0.154099	down
gene25770	10.4349	11.1051	9.98864	0.500923	0.741823	1.12854	down
gene5996	0	0	0.04587	15.5192	16.126	17.3914	up
gene1383	17.227	15.7261	15.325	92.0646	71.373	112.785	up
gene9685	0	0.103576	0	3.1871	4.90151	4.73751	up
gene3030	0.615445	0.485369	0.840977	4.77419	2.77802	6.94696	up
gene24661	3.70697	3.09281	2.74655	0	0	0	down
gene41721	307.502	317.007	297.037	48.2155	38.4025	43.6818	down
gene17215	11.9346	11.4644	10.7122	1.82358	1.66276	1.33434	down
gene12826	462.508	471.327	446.43	60.174	100.862	113.013	down
gene10969	1.02938	1.02127	0.808731	0	0	0	down
gene26786	44.4075	43.8602	42.3907	8.86272	10.8296	11.4096	down
gene13631	0.193051	0.248047	0.228124	1.07082	1.31726	1.65958	up
gene42051	8.40268	10.154	8.08437	42.9031	33.3227	46.5655	up
gene40807	29.5551	29.7711	29.6295	0.0380489	0	0.0319195	down
gene29333	193.589	194.787	196.845	14.7163	15.7315	13.4752	down
gene33131	51.1187	54.0267	53.3721	0	0	0	down
gene17343	0.127799	0	0	40.746	46.9515	46.0201	up
gene40933	6.25863	6.36134	6.42957	0.873724	0.730432	0.452285	down
gene27955	5.7261	7.70913	6.9017	0	0.179596	0	down
gene22684	2.13579	2.00406	2.30858	0.505529	0.437863	0.396171	down
gene26590	7.12782	7.12556	6.28668	0	0	0	down
gene5102	6.21804	7.14901	6.1899	1.70454	1.20057	0.654945	down
Walnut_newGene_7036	2.61849	2.25568	3.0291	0	0	0.0613815	down
gene4529	16.7751	14.7774	17.4639	5.92475	2.20661	3.8289	down
gene25367	31.8359	39.9789	32.7048	6.26954	6.96525	4.83237	down
gene17483	7.93649	4.80254	3.47903	50.4326	22.0658	48.9723	up
gene3884	0.817338	1.05331	0.808792	0.0726067	0.193405	0.102012	down
gene22059	0.692938	1.16483	0.671713	0	0	0	down
Walnut_newGene_3459	0	0	0	15.4555	14.6926	18.0073	up
gene28615	1.75875	2.44689	2.55237	0	0.0126533	0	down
gene31272	3.61173	2.94878	3.46914	0.736848	1.06714	0.594846	down
gene14216	0.25735	0.170586	0.311403	0	6.82e-08	0.00914958	down
gene23086	116.464	117.353	114.468	11.5609	8.21353	8.54776	down
gene16684	113.007	126.195	120.634	2.31283	0.668134	3.25833	down
gene17810	1.93452	2.1465	2.67412	46.8229	44.652	39.7952	up
gene36871	0.0887753	0.229352	0.261795	1.11323	1.44912	1.76059	up
gene41701	17.9569	14.5904	18.0662	0	0	0	down
gene30509	0.955912	1.05873	1.40191	15.6362	22.8618	18.9088	up
gene19302	2.76624	3.22823	4.05054	0	0	0	down
gene475	1.37573	1.4905	1.28859	7.54997	4.78189	5.24931	up
gene14338	21.033	27.0653	16.8902	0.0960174	0.012005	0	down
gene11523	180.594	184.361	175.095	15.5213	18.6326	13.6327	down
gene14825	11.0213	11.9675	11.0181	1.47299	1.37277	1.97288	down
gene10157	16.2099	17.0289	17.4508	0.652941	1.20085	0.447631	down
gene42777	27.1534	28.8035	23.1335	0	0	0	down
gene4196	0.632601	0.865466	0.654485	0.0179497	0.013297	0.0152764	down
gene37162	14.3553	15.4957	11.264	0.886189	2.03697	1.01321	down
gene11426	33.1178	30.989	34.7426	8.12751	8.31832	9.70542	down
gene29257	2840.8	2836.58	2705.59	308.186	467.384	247.928	down
gene12743	1.55899	1.22139	1.80069	44.4421	19.8655	18.551	up
gene29472	167.638	163.474	164.701	3.01104	2.48958	2.93167	down
gene23500	1.00309	1.8056	1.4343	4.28333	4.45141	5.17299	up
gene11608	6.52304	3.32065	6.18916	1.5166	0.158153	0.182767	down
gene32386	0.240475	0.247033	0.254355	1.76555	0.92511	1.16444	up
gene10659	117.647	115.441	110.426	11.2098	18.7997	13.6564	down
gene20158	3.61249	4.6169	4.11337	0.061518	0	0	down
gene22264	184.647	191.723	190.346	1.80486	0.51672	0.271217	down
gene24478	3.7316	4.81646	4.72489	0	0	0	down
gene8477	221.512	226.47	218.138	38.5375	60.018	55.9574	down
gene17378	2.01072	1.66111	0.912012	7.08378	6.62504	6.70878	up
gene26863	4.40262	3.91678	4.15111	0.558069	0.104043	1.245	down
gene30422	0.619674	0.348578	0.216483	4.13381	2.40209	4.84764	up
gene11529	20.403	21.249	17.5414	3.26202	4.28996	3.46875	down
gene13017	0.940057	0.520926	0.875289	0.151055	0.0224023	0	down
gene14812	1.84671	1.42296	1.26584	9.6929	4.92813	7.9609	up
Walnut_newGene_5466	0.181811	0.43071	0.0661095	5.15749	5.86883	6.00989	up
gene3152	2.60241	2.63388	2.7948	1.03677	0.350734	0.503778	down
gene26260	26.362	24.8126	21.9877	0	0	0.0978143	down
gene30463	19.388	17.433	21.8966	4.06485	6.21754	4.66647	down
gene41823	0.186632	0.411794	0.368163	1.80362	1.2328	1.12885	up
gene26878	58.9286	56.8508	55.2573	9.1581	7.11242	9.06908	down
gene22098	1.21989	0.662014	0.932572	0	0.0933791	0.0955287	down
gene13076	12.9525	12.4615	10.9875	0	0.0589507	0	down
gene10516	32.4369	32.5996	31.9858	0.211115	0.259408	0	down
gene30870	0	0	0	1.22195	1.06463	2.03623	up
gene37068	111.607	107.336	108.818	16.6849	25.4437	18.1827	down
Walnut_newGene_4793	3.52352	2.55185	4.28736	0.971441	1.37273	0.328386	down
gene16119	11.5328	9.09278	9.54546	1.11441	1.56114	0.791918	down
gene32437	31.0008	32.4042	31.5804	6.86953	8.00231	7.53622	down
gene35628	8.52072	7.25948	7.85459	1.22054	1.01651	0.603458	down
gene30760	2.91083	2.51511	3.29733	11.4953	9.73159	11.6419	up
gene28387	1.61363	1.29949	1.87533	0	0	0	down
gene12557	198.716	197.353	195.739	24.355	39.1072	17.6455	down
Walnut_newGene_3550	8.20489	2.54198	5.67129	24.4539	24.9726	19.5774	up
gene32364	272.908	288.54	277.208	8.77139	18.1496	6.95642	down
Walnut_newGene_2303	0.3576	0.464954	0.303341	1.64356	2.44174	1.75224	up
gene27287	4.39047	2.99729	3.30144	0	0.0736944	0	down
gene8183	14.0811	14.0589	11.9872	1.15306	1.18648	0.707122	down
gene32452	1.47793	1.41859	1.54091	12.6921	6.18338	11.4451	up
gene7739	2.31802	3.15551	1.87049	30.0704	22.4968	28.0993	up
gene14655	0.544944	0.463455	0.21831	4.52897	3.53914	3.38811	up
Walnut_newGene_5103	2.27694	1.5961	1.36876	0.0918288	0	0	down
gene40284	0.348219	0.179797	0.440153	2.05253	1.71228	1.66212	up
gene36031	43.3324	43.8638	39.8603	177.622	176.783	198.769	up
gene18104	57.9465	46.9972	47.5527	0.651326	0.236402	0.287708	down
gene9991	25.0388	28.8138	26.1425	460.118	269.097	409.992	up
gene27391	0.11536	0.0793474	0.0763642	1.26374	1.3628	1.94279	up
gene21804	3.01119	3.05588	2.89198	0	0	0.007795	down
Walnut_newGene_1918	3.43677	2.582	3.84467	0	0	0	down
gene41530	2.94293	3.9415	1.85402	0.423199	0.470871	0.69105	down
gene7454	2.88996	3.82692	3.19945	0.248877	0.454625	0.227225	down
gene10138	190.221	182.767	180.593	29.9501	26.5885	27.224	down
gene28466	8.75205	7.35113	9.31378	0	0	0	down
gene41405	2.7531	3.00787	2.79299	0.183182	0.526081	0.432843	down
gene2411	14.4169	17.2868	15.8846	1.86594	1.23976	0.677623	down
gene36953	0	0.0541556	0	8.30316	9.43866	11.254	up
gene38136	0.254701	0.28342	0.208397	1.53267	1.18991	1.2918	up
gene2923	8.11324	8.6729	9.28569	1.24293	2.77805	0.992333	down
gene39381	65.0876	63.4254	61.7375	5.48606	7.70165	4.36229	down
gene20899	0	0	0	5.90659	6.70453	6.24803	up
gene16583	381.565	379.391	369.139	13.4617	7.33904	18.8911	down
gene10093	14.1765	12.9144	12.3296	1.39715	0.719386	0.775358	down
Walnut_newGene_112	0.204777	0.242631	7.77e-07	1.2598	1.5693	0.69507	up
gene28197	31.6327	33.1907	26.8244	4.03769	13.3783	2.55002	down
Walnut_newGene_5741	0.421406	0.800223	0.78873	3.56567	3.73895	4.58562	up
gene25601	0.818714	0.262909	0.465545	0.0435032	0.0161658	0	down
gene1078	32.2412	34.4568	37.7587	4.61963	2.48335	2.64703	down
gene32194	24.6213	25.23	23.4963	4.93212	3.6323	3.44654	down
gene21380	233.473	254.258	238.274	15.6886	14.6989	13.2801	down
gene20027	0.989072	1.56719	2.65375	37.0456	35.2694	33.454	up
gene20254	3.08895	4.4481	4.05543	0.11622	0.518145	0	down
gene31821	3.28474	3.36277	3.21282	0	0.0518316	0.0308186	down
gene7550	2.46518	2.56577	1.58893	0.0938092	0.0687754	0.163395	down
gene42650	1.1999	0.963679	1.24495	0.0245091	0.0363886	0.0213176	down
gene14140	171.53	171.402	163.345	3.94469	4.25321	2.94224	down
gene40640	7.05923	7.37341	7.44238	0.174496	0.365679	0.30541	down
gene40787	1.28871	1.85131	1.22629	0	0	0	down
gene20311	14.4574	16.8634	13.8876	108.556	77.9618	111.805	up
Walnut_newGene_3863	0	0	0	6.18263	8.00578	6.536	up
gene2811	6.32825	5.22003	5.95757	28.59	27.3306	32.6114	up
gene15010	4.82593	4.19044	3.40784	0	0	0	down
gene16911	0.0347737	0	0	0.720188	0.496197	0.250414	up
gene10796	0.502292	0.485205	0.581617	0	0.0927513	0.0980466	down
gene21467	8.4514	6.18192	6.80068	1.4801	3.14925	0.550506	down
gene32693	50.862	49.8347	50.2238	0.380606	0.141718	0.075171	down
gene22507	81.3174	85.7093	85.797	17.5882	23.3665	17.818	down
gene25537	25.7046	25.7886	25.1625	0.242891	0.689109	0.0864884	down
Walnut_newGene_1475	1.32921	1.18323	1.1645	0.325134	0.324052	0.04745	down
Walnut_newGene_5349	1.44657	1.27495	1.8919	0.109079	0.120735	0	down
gene4741	0.182423	0	0.184408	2.39063	3.37745	2.1662	up
gene24900	0.539318	0.555025	0.774871	4.02939	3.36298	3.0192	up
gene8523	1.73782	1.6331	1.12042	0.372832	0.639773	0	down
gene26264	1.6345	1.84724	1.78426	0.172737	0.519696	0.0549862	down
gene4623	2.32534	2.04011	2.41343	9.95904	11.6907	11.1438	up
gene20033	0.270514	0.111851	0.524053	2.09626	2.48549	2.22486	up
gene31548	431.825	442.298	433.651	71.895	69.7623	71.3169	down
gene23251	5.61937	10.1303	5.73351	0	0	0	down
Walnut_newGene_6669	1.16248	1.33737	1.06678	0	0	0	down
gene42418	629.797	660.206	644.916	46.7617	76.1307	45.0316	down
gene32681	15.6525	18.1157	17.0953	0.0615975	0.0914751	0.0263246	down
gene33157	74.0606	75.5599	70.5274	17.4692	8.17665	15.1813	down
gene26044	2.02689	1.57414	1.54771	0.653934	0.35333	0.301445	down
gene26360	3.72337	4.01802	3.75172	0.0270809	0.143124	0.123237	down
gene31508	0.844064	0.884544	0.908169	3.51159	3.26413	4.14885	up
gene320	41.5225	38.8128	40.0945	4.94322	4.3502	3.81789	down
gene23430	0.198617	0.138741	0.194495	2.42095	1.24672	1.13821	up
gene23008	85.5339	96.1998	89.6075	9.12994	14.9196	8.49056	down
gene9038	0.110275	0.0572195	0	33.5806	6.65073	15.4072	up
gene1595	18.9401	19.9688	19.174	1.44001	1.17089	2.13356	down
gene20331	14.355	15.2173	14.262	2.7375	1.35645	0.883598	down
gene34798	21.5202	20.1321	22.7174	1.28294	0.335349	0.12235	down
gene15425	1.69913	1.73053	1.45545	0.198302	0.0423446	0.172512	down
gene23054	0.610599	0.164383	0.585643	3.74608	5.07293	2.80521	up
gene31299	0.272241	0	0	1.84591	3.78548	1.28287	up
gene14073	280.815	310.345	292.103	1.06161	1.42321	0.593423	down
gene32407	12.0294	13.4118	13.3803	2.61122	3.69931	1.62688	down
Walnut_newGene_590	0	0	0	0.796595	1.1624	0.777632	up
gene13712	1.07435	0.879483	0.913826	0	0	0	down
gene13051	0.335843	0.291995	0.494441	2.44146	1.83309	2.13379	up
gene28976	6.84839	7.42935	7.9211	2.02979	1.3047	1.9136	down
gene30944	1.74977	1.60593	2.06194	0.267732	0.281116	0.0933356	down
gene3117	1.49755	1.39443	1.45457	14.2082	10.4952	12.1074	up
gene25789	5.03375	3.8507	3.75636	0.27751	1.8354	0.28669	down
gene21094	1.33026	1.19411	1.48832	0	0	0	down
gene35719	76.5664	77.1383	76.5904	389.364	348.931	411.075	up
gene6616	31.4553	34.2222	33.7503	5.94521	6.73877	6.3416	down
gene23019	15.3692	15.6401	14.6727	3.17694	4.12733	3.35853	down
gene26235	4.88946	4.94284	6.00194	0.26712	0.138843	0.192977	down
gene42151	95.0982	95.9404	92.6599	0.518366	0.380397	0.664574	down
gene25657	5.08674	5.04793	4.66018	0.194381	0.274279	0.375682	down
gene34615	0.0278749	0	0	0.869233	0.521698	0.547446	up
gene32130	10.4442	11.1692	10.3975	89.8968	42.6113	59.952	up
Walnut_newGene_5605	0.0553693	0.116425	0.109667	0.858886	0.91737	1.19575	up
gene20345	5.74535	6.27232	7.68913	0.959273	0.849643	0.891787	down
gene9462	1.30361	0.951712	1.18727	0.17579	0.393546	0.248478	down
gene13751	6.82246	6.71337	6.5033	27.0917	25.6962	29.3687	up
gene31442	1.1659	0.968835	0.66905	0.16758	0.206991	0.243364	down
gene38250	154.297	164.267	130.875	6.41611	9.32402	6.78743	down
gene30304	9.03814	9.33762	8.98557	0.458632	0.135198	0.101183	down
Walnut_newGene_4307	13.9989	12.0693	17.1675	0.520074	0	0.455499	down
gene12341	78.3255	77.2225	81.1168	5.19359	10.5396	8.86277	down
gene30612	1.49219	2.13483	1.64752	0.370457	0.190535	0.778176	down
Walnut_newGene_1271	0	0.0166649	0	4.96292	4.5327	4.90092	up
gene17249	1.42004	1.09174	1.93823	6.7982	5.67299	7.36622	up
gene33091	0.238177	0.154238	0.0884916	5.22037	6.32807	6.11333	up
gene21886	0.499914	0.0861827	0.559742	8.18814	3.52133	9.3898	up
gene40663	3.58429	5.49065	4.15923	22.1417	26.8129	20.7734	up
gene12231	40.9627	39.216	38.5923	2.47775	2.90835	0.875838	down
gene39797	158.608	159.07	152.01	4.78407	18.0925	3.93305	down
gene6740	3.30708	2.92948	2.3654	0.151107	1.12453	0.261207	down
gene13988	0.648258	0.753361	0.846999	0.191984	0.0938085	0.0271177	down
gene42768	70.0108	70.9552	72.5164	1.31822	0.34885	0.458745	down
gene9814	2.75747	2.79878	2.78447	0.15085	0.0837967	0.16171	down
gene28913	1.20408	1.35761	1.58292	0.760185	0.0710733	0	down
gene26606	67.7973	74.3059	69.0025	10.9636	10.0453	9.12995	down
gene36473	4.81239	6.9317	6.917	0.23034	0.337576	0.202228	down
gene26378	4.19145	2.83568	3.4291	0	0	0	down
gene6210	3.99158	2.98048	2.28741	1.03209	0.432752	0.405343	down
gene13381	24.0844	20.7871	24.4911	6.47054	6.37029	4.91018	down
gene2788	0.65093	0.864736	0.498635	0.0699093	0.0255886	0.0100108	down
Walnut_newGene_4384	17.465	20.2388	18.0367	2.74058	2.18822	2.19548	down
gene37616	5.48925	7.2433	4.83497	0	0	0.134127	down
gene34817	0.318115	0.0554719	0	15.8655	11.1354	13.4093	up
gene22176	1.08624	1.01855	0.886077	0.165251	0.109504	0.0315578	down
gene12814	2.76666	2.23188	1.84607	0	0.127879	0.150361	down
gene28109	3.21687	2.41085	2.8417	0.416462	0.492318	0.231222	down
gene27709	47.647	47.8129	50.4354	13.5419	13.3487	10.8903	down
Walnut_newGene_5637	0.161579	0.116592	0.0956526	0.743504	0.664494	1.01943	up
gene5967	8.05551	7.03845	5.82373	0.490754	0.425602	0.184944	down
gene29279	3.00569	4.443	3.55859	0.438227	0.448863	0.281476	down
gene39753	0.859768	0.798535	0.793301	3.93168	3.82966	2.56383	up
gene24234	4.72551	4.78582	3.95946	0.215279	0.0321347	0.155105	down
gene42147	2.58863	2.68612	3.33184	0	0	0	down
gene32100	0.218315	0.336634	0.17778	1.28457	0.720181	1.43449	up
gene30074	2.35994	3.05587	4.10648	0	0.0593319	0.143248	down
gene6629	258.297	248.861	268.362	9.03347	3.14284	3.41873	down
gene38712	4.04512	3.98435	3.74665	0	0.0608074	0	down
gene22641	11.1696	11.1273	9.7641	0.0677873	0.603137	0.117818	down
gene21127	46.074	45.272	49.4968	8.11967	4.97803	6.59879	down
gene32444	16.4891	18.6792	17.2329	4.07714	0.991289	2.14914	down
gene20767	0	0	0	9.31009	10.0625	11.5723	up
gene7340	11.95	11.1803	10.591	1.80982	1.96061	0.442243	down
gene26280	74.2362	78.5667	76.7696	6.81167	13.3909	6.7982	down
gene25288	3.66836	4.15575	4.14618	0.414169	1.51077	0.176053	down
gene12846	21.2851	23.3923	22.6892	1.14669	2.32542	1.41854	down
gene4527	331.602	351.839	315.069	16.2821	5.40545	20.6905	down
gene28739	0.469543	0.697884	0.970819	2.84215	2.35672	3.67483	up
gene2792	173.024	175.143	167.717	47.8538	31.0411	48.8827	down
gene20276	188.051	209.325	157.819	0	0	0	down
gene42699	23.9995	23.4069	24.0721	2.77157	1.06881	2.07503	down
Walnut_newGene_4542	0	0.0648974	0	16.1225	12.9598	13.3468	up
gene1235	21.7935	17.0038	18.2234	88.5506	48.0467	99.0773	up
gene40736	5.14209	5.3755	4.8965	0.401272	0.558541	0.397226	down
gene39245	25.0755	24.3524	22.7573	2.99351	1.55418	1.76111	down
gene27043	54.9177	52.3926	55.2916	0.263451	0.247038	0.113207	down
Walnut_newGene_7361	2.14902	2.4295	1.41414	0.346549	0.414094	0.67353	down
gene32605	301.895	297.353	296.447	66.6242	70.0942	48.7576	down
gene33302	1.78236	2.09347	1.88656	0.70425	0.272041	0.446123	down
gene5422	0.414517	0.665642	0.563303	0	0	0.0124672	down
gene23906	13.0041	13.6889	12.6556	2.66919	2.80851	2.73021	down
gene20847	7.03298	6.70257	6.09532	0	0	0	down
gene33547	0	0.27989	0.0404513	1.05852	1.19344	1.99548	up
gene33165	0.133236	0.137804	0.043246	0.815225	0.81412	0.552596	up
gene41395	19.5013	19.3813	19.015	2.26333	1.56477	2.12263	down
Walnut_newGene_2348	0.0681535	0.138558	0.326995	1.23638	1.34388	1.1386	up
gene33001	19.0127	18.6175	16.9258	2.67643	3.87029	1.46334	down
gene39824	1.9001	1.76629	2.99995	36.3236	21.1148	13.3329	up
Walnut_newGene_1388	24.6358	23.4702	24.5644	5.96164	5.47718	3.69436	down
gene39976	5.22117	7.03199	7.66721	0.894002	0.664334	0.56202	down
gene36706	46.1458	48.3679	46.204	4.64049	3.73879	3.24223	down
gene24129	99.037	101.101	100.488	0	0	0	down
gene9586	2.28815	2.45016	2.41248	0	0	0	down
gene30589	0.766943	0	0.207309	3.69554	2.07268	2.53183	up
gene26200	0	0	0	52.8359	36.6914	83.4752	up
gene35232	176.254	175.517	179.601	17.3559	24.2836	16.4447	down
gene34734	394.278	389.634	369.745	22.0418	27.9695	11.9016	down
gene34486	0.273212	0.529066	0.909656	3.96665	2.14513	3.18589	up
gene22857	1.04887	0.573371	0.820102	7.58226	9.24974	7.95999	up
gene36011	1.78587	1.03323	0.841717	0	0.0398288	0.0232357	down
gene15834	4.14789	4.1036	4.68836	0.84522	0.750074	0.334379	down
gene30329	47.5836	49.1549	49.2865	1.13055	0.902949	0.894922	down
gene14757	446.531	452.413	432.141	2565.93	2109.25	2829.33	up
gene1509	0.0716173	0.0757023	0.0357548	0.931068	0.82871	0.627928	up
gene25310	33.4464	32.3206	24.7749	0.112041	0	0	down
Walnut_newGene_5050	13.4862	13.3556	14.4746	57.3382	68.5729	69.4676	up
gene31949	5.54092	7.65872	7.64408	0.62204	0.644724	0.635533	down
Walnut_newGene_4293	12.0529	13.4013	13.4899	2.07948	6.99e-06	0.871109	down
gene40129	219.047	226.321	213.779	49.5722	56.8644	38.6663	down
Walnut_newGene_431	3.36028	2.5454	2.82924	0	0.0392312	0.0565341	down
gene2015	4.60901	5.61194	5.42273	1.47057	0.795417	0.758323	down
gene1410	8.95541	10.3414	6.90263	0.0739604	0.49445	0.447708	down
gene39782	11.8338	9.38302	11.5716	0.899885	0.974491	0.441744	down
Walnut_newGene_1742	3.83272	3.30263	3.75666	0	0	0	down
gene14282	3.99424	4.35444	5.00373	0	0	0	down
gene20714	13.6878	13.7313	13.1684	0	0	0	down
gene29553	9.39618	5.3697	7.11006	0.700523	2.87108	0.654012	down
gene4994	25.1158	27.1113	21.9651	1.20132	1.62565	0.958484	down
gene13488	0.326214	0.374868	0.169141	1.68239	0.846054	1.51363	up
gene28511	5.8083	5.07539	4.02292	1.2493	1.12945	0.665009	down
gene5626	293.964	296.839	279.201	24.172	16.8686	16.4265	down
gene42852	0.303715	0.313442	0.471102	4.26438	4.28268	6.10599	up
gene41667	3054.19	3057.97	2879.04	543.623	704.937	440.539	down
gene4627	3.08326	4.25698	4.73883	28.1823	16.2278	23.2256	up
gene22839	531.788	540.868	526.884	41.4463	60.7919	34.2841	down
gene4631	0.695673	0.698411	0.519286	0	0.018828	0	down
gene30945	4.63233	4.23958	4.34937	0.202608	0.288942	0	down
gene21150	0.112813	0.118647	0.224698	0.64496	0.572194	0.752562	up
gene26037	5.8846	4.08526	4.77788	30.7617	14.6151	17.7167	up
gene10003	4.3129	5.88686	8.2477	0.303341	0.226896	0.197085	down
Walnut_newGene_5922	49.2549	55.9477	54.5922	5.42137	15.5513	2.81958	down
gene11682	1.68085	1.83661	2.05264	0	0.0460578	0	down
gene28847	4.08295	4.08207	3.61778	0.255797	0.606749	0.203799	down
gene7295	1.58247	2.81274	2.3897	0	0	0	down
gene21214	0.168289	0.221996	0.249033	1.5856	1.27688	0.670576	up
gene36443	15.6513	17.6102	14.2348	2.20138	4.31819	1.24526	down
gene22182	2.38145	3.27727	2.9604	0	0	0	down
gene41522	11.0952	9.56662	9.43403	142.371	71.7543	104.5	up
gene28556	14.9464	15.1081	12.8244	1.39016	0.453541	0.952437	down
gene26526	46.627	46.2721	47.6995	0	0	0	down
gene5211	16.0405	17.0095	16.91	0.594133	0.475124	0.64095	down
gene24210	5.64292	5.23896	5.18113	0.0345519	0	0.0897899	down
gene1924	0.215063	0.385426	0.31437	1.11659	1.61263	1.09814	up
gene3197	12.2229	16.2294	15.4778	0.198535	0.129525	0.0634077	down
gene747	5.76437	5.29756	6.10418	0	0.143814	0	down
gene19489	20.7007	20.3879	18.4272	0.317666	0.118064	0.19042	down
gene41613	1.86915	2.70398	2.43031	0.536572	0.615706	0.30355	down
gene1431	0.709872	0.839162	1.24709	8.19729	5.86439	7.15355	up
gene42601	110.411	113.597	114.903	19.3203	12.3935	16.0004	down
gene5748	2.68039	2.18824	2.71073	0.0357656	0.0535511	0	down
gene18350	2.97159	1.41588	1.759	9.97229	11.3048	9.81746	up
gene7997	0	0	0	0.943477	0.733478	0.973784	up
gene29100	25.93	26.5012	22.0835	0.23724	0.180864	0	down
gene27650	1.0973	1.53389	1.45807	0	0	0.0865824	down
gene36133	5.14977	6.35195	5.29763	0.266135	1.2033	0.0774858	down
gene12052	0.51612	0.830803	0.554247	3.23128	2.76289	1.89931	up
gene2963	2.28495	3.56811	2.04261	0.623221	0.427612	0.164451	down
gene16624	270.577	265.769	273.828	14.0782	22.7178	13.6169	down
gene1231	82.3179	93.6192	101.744	18.8316	28.0724	18.2318	down
gene42870	11.0186	11.1856	13.7986	0.383494	0	0.353053	down
gene15064	0.0398585	0	0.0386711	5.85804	6.76552	5.39872	up
gene5375	0	0	0.0287356	2.05114	0.631079	0.70902	up
gene27589	6.4126	5.44699	6.46002	0.691981	2.24886	0.958809	down
gene36517	1.58178	1.81841	1.40837	0.208479	0.360121	0	down
gene15638	1.0729	0.957475	1.06836	0.21493	0.214416	0.316327	down
gene32184	53.3412	45.9735	51.697	13.4288	13.02	12.1523	down
gene6190	7.38742	6.28663	7.5625	1.18389	1.34315	1.1436	down
gene38808	19.4828	20.2374	20.0777	2.58741	1.3364	0.912151	down
Walnut_newGene_5182	0	0	0	8.13949	8.24772	7.52418	up
gene41254	0.179358	0.577604	0.531929	11.9244	20.1384	6.25785	up
gene15089	14.7424	14.9133	13.4246	0.542633	0.239644	0	down
gene34972	30.6608	31.7244	31.0922	1.0559	1.72977	0.684422	down
gene29987	0.139061	0.0705165	0.0670598	24.66	15.3139	22.5734	up
gene29980	0.790647	1.03425	0.897496	8.07494	5.34731	6.02107	up
Walnut_newGene_3682	19.5278	18.6096	21.633	4.42132	3.04922	3.02383	down
gene7758	50.7684	50.9462	53.8144	10.481	10.7319	14.2338	down
gene11410	3.05446	1.41791	1.82231	0	0	0	down
gene30789	19.9903	23.2775	20.0544	1.91059	1.02793	0.553386	down
gene21739	6.53181	8.75453	6.48009	0.800946	0.756685	0.419315	down
gene30938	9.78921	9.01395	9.89642	2.45428	2.3936	1.94558	down
gene35730	7.44062	8.63981	9.18086	1.09916	2.65325	0.503871	down
gene11806	0.979458	1.43534	1.35442	0	0	0	down
gene42218	7.69375	9.15649	8.66396	0	0	0	down
gene6032	24.7097	24.32	24.6304	4.45859	7.35141	6.03571	down
gene20217	0.267308	0.622708	0.488534	11.9147	8.28988	8.88313	up
gene35300	49.0662	49.2474	50.3159	3.5971	6.4143	3.88699	down
gene827	199.115	223.184	205.546	35.9119	66.9387	26.7455	down
gene27844	40.8019	41.6448	36.117	2.18932	6.21743	2.13204	down
gene3433	508.229	510.885	513.974	34.0439	36.2749	33.7338	down
gene40823	128.217	128.382	119.525	18.9406	17.7507	14.3544	down
gene41755	3.18611	3.86144	3.13287	0.14276	0.192653	0.0741135	down
gene3968	8.46035	7.85917	6.89266	1.01401	1.43889	1.10784	down
gene30309	3.78237	3.37944	2.99827	0.711412	0.418157	0.641931	down
gene33991	0.340456	0.274533	0.4012	2.32452	1.38744	1.17912	up
gene12796	81.0557	88.511	77.6245	0.060169	0.267928	0	down
Walnut_newGene_1382	1.41931	1.92841	1.6918	0	0.0432027	0	down
gene16049	0.325532	0.57343	0.635979	19.6731	20.0747	16.3721	up
gene5774	29.3458	28.7274	28.9268	0.634095	1.8251	0.414323	down
gene4751	1.78647	2.27439	0.790599	0.0652412	0.0491587	0.350025	down
Walnut_newGene_7116	4.29571	5.28384	5.66362	0	0	0	down
gene6873	35.2655	36.8735	37.0264	4.49628	4.37962	3.89014	down
gene23034	25.3461	27.049	25.3148	0.0264164	0	0.0676942	down
gene32517	9.26055	8.42778	7.72691	0.654245	0.654006	0.594265	down
gene35639	254.565	258.475	248.292	12.541	25.5538	10.2925	down
gene17137	806.765	806.35	772.189	34.8089	65.9526	37.7971	down
gene27335	0.555149	0.49291	0.881109	0.0515534	0.0647629	0	down
gene6363	6.44346	7.04313	6.55419	0.731711	0.405549	0.398362	down
Walnut_newGene_6248	51.7008	54.5812	49.0693	4.47778	10.4336	7.82416	down
gene8671	0.130663	0.108727	0.0776276	1.61199	1.08303	1.43909	up
gene36266	1.03588	0.916895	0.972711	0.0841592	0.0340375	0.0390664	down
gene30942	3.35083	3.96454	3.47321	0.998969	1.49385	0.414781	down
gene21370	0.0972072	0.0508955	0	4.41119	4.59282	4.79497	up
gene31030	1.26781	1.32674	1.3743	0	0	0	down
gene5077	4.29598	5.84887	4.53151	4.59e-08	0.350275	0	down
gene34047	0.297315	0.351944	0.66867	5.51862	2.66327	3.60973	up
gene32113	54.6634	61.3446	54.1795	12.0379	12.629	15.345	down
gene38697	26.1072	30.4717	24.1198	4.9779	6.04362	6.19663	down
gene5596	1.04961	1.36843	0.8499	0	0	0	down
gene14428	17.9128	18.1938	18.5965	0.993358	1.00305	0.305633	down
gene3154	5.72597	6.21442	5.37237	28.3559	19.4137	23.3799	up
gene13339	6.60425	6.89143	5.74818	0.532566	2.3741	0.132015	down
gene29969	6.16704	8.4598	7.57902	0	0	0	down
gene6792	13.9233	15.2119	12.3699	1.35953	1.67864	0.817856	down
gene4632	0.799791	1.00258	1.16476	0	0	0	down
gene25334	2.80672	3.79799	2.68155	0	0	0	down
gene11016	766.576	774.587	743.942	39.0578	80.8921	83.4201	down
gene10049	33.6881	29.7604	28.9849	1.05681	1.22093	0.676808	down
Walnut_newGene_5894	0.448632	0.131632	0.425551	2.06673	1.64548	1.67267	up
gene37076	34.7565	33.5583	34.4761	3.2711	1.17285	1.41275	down
gene36733	0.0488538	0.15909	0.143349	1.70297	0.997273	0.581986	up
gene18167	0	0	0	19.27	22.2185	25.3765	up
gene34154	12.5543	11.951	11.2381	2.83256	2.51315	2.55924	down
gene2606	1.59942	1.05765	1.48474	0.26231	0.328278	0.379453	down
gene10538	2.86363	3.67127	4.20689	0.850357	0.351099	0.332028	down
gene10152	3.57241	3.23215	3.60409	0.814008	0.643916	0.844768	down
gene42001	13.5095	13.2493	11.5899	0.246078	0.147543	0.172913	down
gene37351	2.22901	3.65826	2.33394	0	0	0	down
gene26721	20.9161	21.6531	22.1815	0	0.198535	0.349045	down
gene2345	8.94588	7.53577	6.50924	0.12515	0.422478	0.266869	down
gene23621	10.1905	8.96893	6.80332	0.915713	0.431858	0.641388	down
gene25907	458.621	453.37	455.245	63.1852	48.5433	66.1602	down
gene14037	4.18235	6.4267	5.94906	0.291736	0.180523	0.33593	down
gene10494	2.28923	2.79209	2.97385	0.179177	0.798815	0.155171	down
gene5053	9.47149	11.9239	10.3466	0.124256	0.552463	0	down
gene3936	4.2024	4.14871	4.482	0.864983	0.964664	0.834907	down
gene5991	10.4707	10.5335	11.1439	0	0	0	down
gene27385	0.854677	0.783563	0.798517	0.176292	0.147957	0.172443	down
gene29769	31.3191	28.9508	28.4721	1.70397	1.47855	1.14703	down
gene42170	0.537845	0.495837	0.531619	7.13196	4.80757	5.14213	up
gene7703	5.70797	5.60102	4.79642	1.83146	1.30217	0.912748	down
gene31386	6.40242	6.34399	7.23547	1.01256	2.34332	0.875291	down
gene32290	28.859	30.9668	29.6921	4.04678	6.53405	5.15495	down
gene20446	6.30241	8.0742	6.87215	1.57988	1.31513	0.830309	down
gene14574	3.02564	3.33044	2.07868	0	0	0	down
gene11728	67.5929	69.0528	63.6535	2.44702	7.21252	1.35757	down
gene25666	23.9594	22.1754	23.5052	3.02504	3.61031	4.54539	down
gene29656	2.58689	2.4975	2.56463	12.813	9.41097	12.781	up
gene14281	5.72922	7.39515	6.31611	0.0236295	0.017635	0.101998	down
gene7119	1.93989	1.98446	1.83193	11.8169	7.44959	11.4749	up
gene33549	7.26949	6.3659	5.67504	0.0834116	0.0330848	0.113364	down
gene3431	1.67339	1.31332	1.36072	31.4837	10.1386	21.479	up
gene12178	4.70859	4.09103	3.73118	56.4406	55.5384	63.1615	up
gene25347	68.3648	70.1685	73.6869	8.5229	5.46948	4.47855	down
gene26148	0.521459	0.47324	0.772768	0	0.0904285	0.0899191	down
Walnut_newGene_4760	0	0	0	2.87185	4.35096	7.7289	up
gene25623	2.0714	1.68572	2.11944	8.15645	9.52845	8.56737	up
gene35993	1.56003	1.19761	1.35114	0.152673	0.457566	0.231744	down
gene26003	0	0	0	0.338982	0.32584	0.376296	up
Walnut_newGene_1030	0	7.21e-07	2.56e-06	0.638024	0.747937	0.909667	up
gene36083	244.212	233.899	223.512	23.7481	34.2006	14.3721	down
gene5119	12.847	13.2844	13.0309	3.30247	2.61791	3.21968	down
gene28700	1.77784	1.98317	2.91651	0.116127	0.520595	0.710717	down
gene34675	3.77391	4.41667	4.3357	0.409135	0.175046	0	down
gene36541	0.71867	0.91909	0.706841	0	0	0	down
gene150	1.58565	1.55378	1.52176	0	0	0.248224	down
gene33685	14.8781	15.0472	11.149	2.19071	1.94399	2.58416	down
gene7141	4.11194	5.34624	3.62116	0.078832	0.0295443	0	down
gene26142	13.6799	12.8427	12.0742	2.36276	3.7806	3.37781	down
gene31706	70.4316	73.7278	72.2593	0	0	0.0449033	down
Walnut_newGene_660	0.607393	0.168126	0.643418	5.41232	7.2735	7.36838	up
gene19813	3.54419	6.76915	3.01972	0	0	0	down
gene38908	5.0773	4.9221	5.64249	0.554325	1.25216	0.883818	down
gene23229	14.889	15.5794	13.442	0.0766167	0	0.134687	down
gene16957	3.6958	3.32815	4.26338	16.4905	21.529	14.6861	up
gene34801	8.42244	8.89536	9.3373	0	0.101967	0	down
gene3468	1.84117	1.59711	1.91433	17.1306	20.6345	16.8334	up
gene1518	2.61796	3.76153	1.98046	0.473498	0.762868	0.139012	down
gene7786	5.08704	5.30382	4.64828	0.385927	0.518869	0.410269	down
gene15483	0	0	0	27.2283	24.2714	33.8474	up
gene4771	44.1056	35.0923	41.4929	5.94372	6.05589	3.76179	down
gene14772	8.90199	10.4968	10.396	38.8537	45.3242	51.9018	up
gene4287	4.76285	4.65455	4.30264	0.703599	0.385123	0.476629	down
gene24899	20.6025	17.9796	16.157	1.44825	1.37817	1.20854	down
gene13509	1.70801	2.62024	1.63761	0.0724688	0	0.18232	down
gene25802	12.9964	12.0343	8.15664	0.422038	0.887942	0.880523	down
gene29704	0.416836	0.434134	0.487734	67.4046	98.4765	91.6286	up
gene21106	18.1732	28.0957	23.3874	158.178	139.984	155.852	up
gene10221	36.5017	39.8525	35.3508	0.944566	0.771875	0.650295	down
gene13031	2.79995	2.83053	3.69256	1.03777	0.398836	0.822552	down
Walnut_newGene_4827	4.81529	6.93741	2.7162	0	0	0	down
gene38784	54.1738	54.2537	52.034	16.179	12.0001	9.57685	down
gene34544	3.71794	5.02896	4.50245	0.76753	0.47276	1.13121	down
gene26699	2.83478	3.56678	2.38909	1.17428	0.467456	0.627675	down
gene26028	0.568664	0.523641	0.200321	2.16621	1.32272	1.57848	up
gene41676	8.14963	9.88483	6.38122	0	0.114885	0	down
gene41422	0.281205	0.479929	0	6.41045	3.42573	4.61086	up
gene1206	2.36409	1.75333	1.10205	0	0	0	down
Walnut_newGene_357	3.46767	1.76814	3.39669	0	0.0385078	0	down
gene14357	84.6225	85.6255	86.3705	0.497364	0.545345	0.199473	down
gene37781	8.96333	9.35823	10.6294	0.503114	0.760236	0.0408827	down
gene24826	0	0	0.0248632	1.35165	0.937784	0.379621	up
gene9110	3.03453	2.98986	2.4886	0	0	0	down
gene3481	422.639	421.287	422.954	43.034	82.3583	54.5425	down
gene22512	2.99186	3.25771	2.26092	0.144425	0.215023	0.085007	down
gene10611	0.996296	0.727914	0.933834	7.31112	3.50423	3.69127	up
Walnut_newGene_546	12.156	12.861	12.7288	1.73608	2.0297	2.41928	down
gene13200	57.7904	58.3029	64.5459	0	0	0.225217	down
gene24702	0.964394	1.13198	1.31464	0.214774	0.303838	0.148038	down
gene21936	9.2299	8.79718	9.12355	0.0430017	0.0637812	0	down
gene20297	2.06543	2.34159	2.38367	0.588088	0.606637	0.397999	down
gene16743	20.653	19.5539	18.8694	0.85073	0.37283	0.61317	down
gene2307	18.8064	16.0385	15.0189	2.22886	1.28376	0.97114	down
gene14702	1.96436	2.34918	1.73948	0.433164	0.832004	0.173296	down
gene29130	24.9187	24.3706	21.6896	1.74673	1.70056	1.26288	down
gene4792	0	0.19136	0.107212	2.03776	1.8111	2.76793	up
gene38812	19.4254	19.9952	18.8596	2.67183	3.10821	2.15506	down
gene15718	2.46184	3.34673	2.63631	32.5113	25.8535	33.5689	up
gene16334	0.0193217	0.161658	0.0255458	8.22513	5.83201	7.71161	up
gene19683	207.541	238.638	196.585	43.627	71.7239	41.9554	down
gene16627	3.00132	2.42442	2.47452	0.419289	0.613651	0.0730148	down
gene4915	3.44699	2.42083	2.32764	0	0	0.0265452	down
gene37482	7.57e-05	0.0623743	2.36e-05	0.599555	0.397034	0.917079	up
gene28606	6.31461	6.19729	7.4741	32.1147	23.2957	24.9695	up
gene34494	20.213	20.1066	18.3045	0.700126	2.95955	0.988571	down
gene32201	13.9097	13.093	14.2434	2.07568	1.00263	1.15119	down
gene37887	2.48307	2.96302	2.8792	0.229075	0.438	0.243619	down
gene26354	19.337	22.6332	19.9977	0.0307567	0.2076	0.0551357	down
gene29889	70.1798	65.0989	70.9462	15.2582	18.4538	17.0867	down
gene22563	13.5928	15.0608	16.955	0.160213	0	0.143709	down
gene38328	4.56353	3.85939	3.99781	0.183069	0.404764	0.206983	down
gene7695	47.3461	50.1953	52.0004	10.1487	7.45908	9.77442	down
gene41286	8.80884	9.52052	8.3769	0.0421908	0.737963	0.375912	down
gene28126	6.1096	5.90693	7.71024	44.5869	32.71	27.0312	up
gene30981	50.7309	54.9427	50.5403	5.3712	7.7198	7.24242	down
gene25349	1.23039	0.626711	0.884943	197.227	262.109	208.118	up
gene32525	9.32407	10.1676	10.3741	1.14015	0.874932	0.621313	down
gene40028	98.2086	113.658	98.7485	10.2982	5.02973	5.74792	down
gene30301	1.91108	1.82421	2.84484	0	0	0	down
gene20866	6.38873	7.57313	6.90145	0	0	0	down
gene23405	41.0893	40.9394	36.7373	2.02132	1.27698	2.03886	down
gene22659	88.9617	100.82	88.0309	10.4809	14.5507	9.47784	down
Walnut_newGene_1575	10.4621	6.87781	8.09179	0	0.442376	0	down
gene14369	3.21624	3.41031	2.89307	0	0.230717	0.0538794	down
gene38943	1.04165	1.86058	0.876824	8.99325	4.38892	4.10343	up
Walnut_newGene_5996	0.167604	0.0745067	0.266495	1.94343	1.63084	1.94525	up
gene8861	2.81174	3.23423	3.33497	0.418468	0.268215	0.154499	down
gene37208	5.8112	3.95082	5.47987	0.423566	0.488703	0.604	down
gene30527	11.9959	8.93719	9.43713	1.97557	3.01029	2.69376	down
gene12372	5.41896	4.20913	4.00676	1.10557	0.974629	0.737537	down
gene1405	0.685824	0.595042	0.849675	0	0.0204866	0	down
gene3603	2.432	2.09374	1.04621	0.0942503	0.165975	0.0836753	down
gene39817	13.9571	14.2351	13.7663	0.245413	0.464692	0.584778	down
gene41154	1.36487	0.780631	1.48945	0	0	0	down
gene39488	0.370067	0.555468	0.565533	0.0322799	0	0	down
gene9774	34.8719	34.8611	36.1871	9.54211	7.00141	7.72368	down
gene31115	0.324908	0.0841789	0.0389913	1.51891	1.0457	1.22947	up
Walnut_newGene_4798	2.53e-17	0.0549338	0.255045	1.01434	0.892973	0.811904	up
gene10384	4.17342	3.36314	3.96784	16.3444	21.7646	27.6182	up
gene8461	22.4084	24.5324	22.8393	0.0884165	0.165069	0.0126733	down
Walnut_newGene_1281	9.00918	8.74404	8.55305	1.16402	0.881165	1.1821	down
gene8454	5.07135	5.02605	4.94903	22.2807	20.2739	19.9822	up
gene15910	0.869017	0.712058	0.766	0.0326834	0	0	down
gene42104	2.40626	2.15449	1.92889	0.372615	0.3969	0.275804	down
gene17903	1.63984	2.34881	1.13724	0.172974	0.525029	0.248776	down
gene20833	6.39338	6.51735	6.70394	0.0270139	0	0	down
gene9256	2.94535	2.14172	3.24181	27.7335	10.9213	25.0413	up
gene1454	3.54069	3.58803	4.07258	0	0	0	down
gene9284	5.9483	7.24771	6.25105	57.658	75.8208	80.3313	up
gene39286	7.85859	8.55361	9.7382	0.0446626	0.0315893	0	down
gene8482	1.45642	1.23074	1.62865	9.73611	12.2495	9.19434	up
gene20511	0.293224	0.45947	0.204959	0	0	0	down
gene15398	1.64089	1.33116	1.40088	0.245242	0.240868	0.165095	down
gene33759	0.964925	1.00592	0.728321	0.348539	0.0615759	0.162643	down
gene16360	52.1316	55.5422	50.5188	1.85893	1.42939	0.748066	down
gene33199	3.55837	5.45084	2.69689	1.14833	0.485869	0.792667	down
gene33580	24.1	24.5319	21.2282	228.422	150.793	226.332	up
gene35168	5.7965	4.33298	4.96184	0.471408	0.239421	0.154662	down
Walnut_newGene_271	2.86401	2.36611	2.31324	0.401169	0.828703	0.423779	down
gene31300	7.63143	10.1269	9.71527	0.0563332	0.353636	0.311503	down
gene2564	0.238343	0.0606503	0	1.22221	1.4817	0.59938	up
gene36575	17.5549	17.7697	18.4701	1.45232	1.51848	0.816137	down
gene7528	1.95338	2.08044	1.59682	0	0.0236906	0.0358474	down
gene39400	1.34219	1.82394	2.14125	0	0.236987	0	down
gene7676	0.490044	0.781328	0.639251	3.13063	2.45667	3.08132	up
gene14535	0.211689	0.43188	0.128156	1.14286	1.29949	1.4214	up
gene7911	40.4702	40.208	42.0438	8.60447	3.56806	3.27649	down
gene39097	283.115	296.05	281.422	4.90557	22.7841	7.26274	down
gene39442	0.111495	0.0233321	0.0659062	1.38263	1.50415	1.1269	up
gene34509	31.9389	31.8575	29.6714	3.59651	12.1744	5.29651	down
gene27383	16.0776	14.5176	12.2372	0.903448	0.329441	1.79952	down
gene1043	12.2336	11.3801	12.3958	3.64196	3.17774	2.67995	down
gene34720	53.7217	51.059	54.9342	8.9031	10.5795	9.46043	down
gene27556	10.6316	10.7413	10.212	0.0421823	0.0942753	0	down
gene23069	3.41187	2.86624	3.91198	0.989786	0.898791	0.429401	down
gene23347	9.25636	5.32906	9.33768	0.732861	0.997606	0.627045	down
Walnut_newGene_5682	0	0	0	3.58597	3.64193	3.51253	up
gene15580	7.05498	6.62974	7.07398	0.0858516	0.220708	0.0805803	down
gene36571	3.12576	4.43067	3.94116	0.801154	0.706479	0.722412	down
gene11119	6.00996	5.95021	5.63635	0	0	0	down
Walnut_newGene_1576	0.940734	1.02118	0.850338	0	0	0	down
gene37522	13.0157	15.682	12.9711	2.63935	2.50814	2.15353	down
gene15855	95.692	93.1114	93.8137	8.84168	13.8034	5.97769	down
gene9301	1.61839	1.65037	1.44385	10.9162	13.2496	15.0014	up
gene32038	0.889609	1.21397	1.50136	0.12491	0.0474148	0.0617041	down
gene11720	33.985	36.6217	34.0905	2.65747	1.89538	1.25285	down
gene19299	36.7626	38.4285	35.4442	2.49038	1.34297	4.10969	down
gene2958	6.38812	5.57032	6.39645	38.3065	20.8253	21.6076	up
Walnut_newGene_853	6.25804	5.36589	5.51058	0	1.34e-06	1.63e-06	down
Walnut_newGene_167	5.35225	2.75146	3.74492	0	0	0	down
gene30669	11.6598	9.12525	8.0111	1.43505	1.68369	1.12797	down
gene15885	89.8515	91.7876	88.5911	18.8664	22.8248	20.3786	down
gene11599	1.11078	0.901819	0.470281	3.55106	4.02932	4.03965	up
gene10747	221.951	228.185	221.653	2.74025	2.74454	1.43486	down
gene39564	0.245884	0.221119	0.244094	2.01915	1.0209	1.48028	up
gene7893	0.450378	0.725969	0.533851	4.99569	4.34111	2.72466	up
gene15786	0.0303551	0.280782	0.178303	1.02841	1.1876	0.756451	up
gene7804	3.2798	3.07319	4.73673	0	0	0	down
gene28563	38.1522	39.2795	36.6393	0.469656	1.678	1.44068	down
gene38252	1.45312	1.10935	0.907671	0.0879686	0.102944	0.0199703	down
Walnut_newGene_2152	0.332363	0.177152	0.0808389	0.959614	1.27646	1.7603	up
gene10840	27.5584	29.2312	28.4984	2.37709	2.98889	2.71268	down
gene27041	5.68526	4.90963	4.03768	0	0	0	down
gene39930	0.322128	0.151308	0.280683	3.41431	1.66334	1.93577	up
gene29412	0.0706016	0.662759	0.137743	2.24335	1.99462	2.04562	up
gene14303	74.2047	72.3939	69.0047	6.89183	18.7888	2.53644	down
gene11913	1.54802	0.759719	0.727446	0	0	0	down
gene30440	13.711	12.4207	12.9836	3.3243	3.1461	3.06981	down
gene30711	3.30822	2.75319	4.54833	0.245668	0.274105	0.106782	down
gene19258	1.7032	2.89949	1.64031	8.6506	15.518	10.8041	up
gene8439	17.2304	17.7802	17.2	144.031	124.788	123.159	up
Walnut_newGene_4416	20.1034	18.5997	15.6942	0	0	0	down
gene24818	10.4823	10.3637	7.78511	0.204787	0.206023	0.0613191	down
gene15417	344.367	369.919	362.301	30.2362	38.5442	30.2978	down
gene42040	67.544	65.2967	64.5119	23.0059	12.2984	11.4415	down
gene20524	5.79202	5.02669	3.77769	0	0.0561875	0	down
gene36930	1.58852	0.923972	1.84984	0.555491	0.189774	0.275744	down
gene38384	4.4108	5.05135	3.9698	0.0359285	0.0266747	0.0309073	down
gene396	23.7225	24.6299	26.0734	0	0.0932727	0	down
gene33005	22.3905	22.873	21.8445	2.12127	4.29319	1.58739	down
gene41367	12.8358	12.2464	11.0415	0.386031	1.26187	1.25402	down
gene26100	0.830861	0.860864	0.442514	10.2555	6.49103	8.418	up
Walnut_newGene_5139	2.30556	1.77534	3.06163	0	0	0	down
gene37972	19.9341	20.4238	21.3672	3.11674	3.5992	2.71365	down
gene17829	6.47631	4.42663	6.20411	0.197566	0.508659	0.924776	down
gene36208	1.13767	1.0696	1.14927	0.591111	0.128535	0.155104	down
gene11520	0.564358	0.816628	0.494708	0	0	0	down
gene23412	0.284797	0.193224	0.18768	1.06995	0.891533	1.2327	up
gene4376	3.23029	3.29852	4.1685	0.249246	0.0783928	0.448877	down
gene22625	0.060767	0	0	0.7147	0.275454	0.457724	up
gene2132	15.0414	14.5159	16.2054	2.79997	2.90686	3.2826	down
gene23042	1.57912	1.5886	1.60145	0.030241	0.0683245	0.0269875	down
gene27033	2.24648	2.26102	2.63271	0.170587	0.170488	0.268491	down
gene20794	0.364046	0.568651	0.579974	19.728	26.0463	19.8889	up
gene12882	18.4746	19.8674	20.0187	1.27447	2.96955	1.21897	down
gene35137	0.786999	0.855144	0.628881	0.170164	0.0692027	0.0706696	down
gene13783	9.27893	7.98156	8.04321	1.0131	0.924237	1.54862	down
gene19862	0.249303	0.775986	1.80037	18.0716	14.8759	15.9118	up
gene13023	0	0	0	3.30472	6.3321	4.41888	up
gene20189	11.1702	14.0423	11.71	1.53707	1.15391	0.831808	down
gene38359	259.808	260.168	243.124	20.0875	16.3346	15.1498	down
gene18492	2.51198	3.20738	3.4091	0.204241	0.452967	0.0568236	down
Walnut_newGene_3846	0.683643	0.828981	0.715488	1.93e-08	0.091021	8.99e-09	down
gene10264	38.3623	34.5385	34.5555	0.207451	0.183073	0.261289	down
gene41566	1.9591	2.10177	2.032	0	0.0147804	0	down
gene5987	2.87357	3.84577	5.16825	0.0144601	0	0	down
Walnut_newGene_5100	0	0	0	9.76501	9.42224	9.09426	up
gene15219	6.15266	7.7354	6.19588	0.0258619	0	0.022917	down
Walnut_newGene_4484	1.93422	2.35812	1.93637	0.154325	0.46076	0.201105	down
gene33338	47.9465	45.7403	46.231	10.6159	14.7674	8.20547	down
gene16463	0	0	0.136507	1.11828	1.08849	0.684084	up
Walnut_newGene_7129	2.77781	3.17897	2.41448	0	0	0	down
gene38035	11.9493	11.8463	12.7604	54.904	57.5553	51.7947	up
gene32069	40.8621	39.6825	38.3181	4.47039	3.81573	2.5407	down
gene4157	1.71905	0.746314	1.55829	9.26959	7.66597	6.68502	up
gene11822	1.44118	1.14352	1.39424	0.0892914	0.132266	0	down
gene41236	2.72172	4.41902	5.33392	0.763542	0.362044	0.245389	down
gene834	39.2244	33.6734	38.3231	2.74384	2.02625	1.3064	down
gene15171	0.160602	0	0.0773035	1.23484	1.10811	1.07576	up
gene35433	7.66878	10.0272	8.16943	0.215673	0.474868	0.279976	down
gene15545	0.59822	0.586441	0.399575	0	0	0	down
gene11351	3.5156	3.05962	3.00439	0	0	0	down
Walnut_newGene_3277	2.81419	3.03933	3.88749	0.871752	0.702346	0.681823	down
gene31196	0.8361	0.868588	1.00396	0.159459	0.118788	0.110014	down
gene23572	19.5873	18.1426	15.7673	0	0	0	down
gene42970	0	0	0	5.48779	2.97703	4.18033	up
gene5612	112.562	121.557	123.112	8.04836	9.0374	4.43399	down
gene2789	0.837782	0.73512	1.13822	0.166838	0.0779002	0.23149	down
gene27538	1.53334	2.39909	2.13701	0.369302	0.238018	0.390662	down
gene40607	654.816	676.492	648.472	114.881	102.957	109.852	down
gene32805	0	0	0	0.840343	0.809184	0.834175	up
gene41627	3.80386	3.72386	3.62598	0.429745	0.639567	0.66686	down
gene20210	1.85794	2.25876	2.16201	0.912635	0.481809	0.248162	down
gene41519	16.6398	16.4287	17.9596	2.4717	2.76214	2.1218	down
gene13135	21.8277	21.4802	21.9258	334.221	221.389	304.039	up
gene16401	0.337866	0.174984	0.38926	4.904	4.88132	2.23625	up
gene37395	5.07633	5.32355	5.00646	0	0.0289081	0	down
gene39530	0.138489	0.148521	0.0349419	1.66942	1.2361	1.33554	up
gene34465	180.716	175.505	178.97	16.2919	16.2505	16.2286	down
gene37094	1.23878	1.55632	2.01853	0	0	0	down
gene30759	69.1276	74.6978	75.557	4.53472	5.07546	6.35745	down
gene41531	3.24143	2.62664	3.85319	0.413916	0.359034	0.556969	down
gene7091	0.965844	1.03131	0.997451	0.114964	0.0493997	0.0285063	down
gene33586	4.48347	5.85856	5.70775	0.318995	0.17907	0.0715947	down
gene10322	20.6376	25.0663	21.594	3.38402	5.42691	3.11151	down
gene8016	1.41175	1.96695	1.60439	0.0855576	0.105995	0.221095	down
gene39016	1.00353	0.720108	1.21924	7.31233	6.59253	4.28467	up
gene16153	0	0	0	25.5374	29.2404	26.6868	up
gene1007	4.16686	4.1256	4.19788	17.4848	22.7749	21.4298	up
gene23957	1.15438	1.47016	1.86094	0.338368	0.151267	0.132021	down
gene40030	5.83248	5.87086	5.68104	23.0473	24.7925	26.0464	up
gene17780	58.1706	64.0591	60.4876	2.11924	3.04243	2.27261	down
gene39644	40.7285	42.0511	43.1443	8.83044	10.2034	8.12589	down
gene39374	3.91274	2.86066	3.946	0	0	0	down
gene41006	0.226053	0.14849	0.391597	1.46778	1.42938	1.46752	up
gene42193	0.954511	0.783105	0.561624	0.278448	0.111223	0.0796664	down
gene22117	17.565	18.0777	19.1787	1.35957	1.71727	0.868393	down
gene24991	3.1132	2.82048	2.58338	110.157	39.4164	36.6079	up
gene22968	44.4472	43.9397	39.8302	0	0.0453498	0.0535926	down
gene27476	251.537	257.235	268.057	52.2871	75.6828	47.5469	down
gene39414	1.28901	1.36708	1.11422	0.114064	0.169899	0	down
gene30021	22.4206	17.6811	21.8525	0.531649	0.796108	1.071	down
gene2437	8.62999	7.80481	7.97095	0.674968	0.913434	0.519237	down
gene5218	1.3808	1.31093	0.922789	8.29754	8.48296	9.51756	up
gene8950	1.62244	0.713316	1.29285	0	0	0.0747011	down
gene8402	5.84771	6.39537	6.93381	61.9911	62.5168	58.9703	up
gene11952	23.7398	29.3935	28.6387	4.49142	2.81968	4.627	down
gene27600	22.4543	20.9412	27.7227	1.6502	2.08544	0.734733	down
gene21637	872.111	898.734	881.064	202.449	211.312	149.285	down
gene22694	2.03904	2.11122	1.37906	0	0	0	down
gene30228	1.4484	1.14587	2.20871	0.249871	0	0	down
gene16084	6.40311	5.75369	5.43866	0.434541	0.221924	0.101978	down
gene24466	5.59882	4.44662	5.59495	0.119671	0.266853	0.519471	down
gene15238	1.82289	3.1573	1.55238	0.213915	0.358242	0.20718	down
gene21372	5.32963	5.21687	5.03531	1874.94	641.326	1934.4	up
gene31635	0.16351	0.0663199	0.127633	0.416729	0.850089	0.667674	up
gene5928	3.1989	3.22651	3.60947	0.0480095	0	0	down
gene28985	0.0412024	0	0.0199623	1.31528	0.585227	1.02745	up
gene38959	21.0059	18.3066	17.8719	0.579683	2.21111	0.660828	down
gene4933	25.804	21.2672	19.9844	0.402037	0.518103	0.0883404	down
gene25800	0.419641	0.157165	0.543623	7.06228	5.32947	7.28877	up
gene20147	0.787726	1.80434	1.6109	0	0	0	down
gene25082	29.0652	21.08	25.6814	0	0	0.0953101	down
gene24153	1.68217	1.44084	2.038	0.415714	0.426474	0.422578	down
gene13770	5.25027	4.67006	4.9609	40.8408	38.5149	41.3215	up
gene42302	2.80055	3.7652	2.64657	20.673	19.5696	15.5025	up
gene28949	0	0	0	15.3999	10.34	18.793	up
gene9311	3.32289	3.59194	2.82489	13.1935	11.378	13.5227	up
Walnut_newGene_5303	1.21249	1.4216	1.21331	0.328756	0.117834	0.197473	down
gene25078	30.8818	31.9775	30.4721	0.200628	0.546736	0.503309	down
gene35715	9.07831	9.25166	9.64084	1.04271	0.563268	0.583955	down
gene22720	14.026	15.2928	15.2166	0.517968	1.30237	0.751773	down
gene20091	0	0	0	121.018	112.549	114.736	up
gene2299	0	0	0	6.04121	2.93128	7.47238	up
gene39645	0.564059	1.0133	1.72441	7.78785	5.83731	6.28844	up
gene42735	2.58452	2.94277	2.53892	0.674191	0.854427	0.298786	down
gene22803	2.1927	1.80822	1.40132	0	0	0	down
gene24865	2.69423	2.82324	2.43404	0.304353	0.62155	0.280105	down
gene1916	3.29412	3.56702	3.59269	0.786719	0.191215	0.65415	down
gene7256	4.22413	3.93952	3.65887	0.657137	0.551006	0.740469	down
gene22425	0.102434	0.026058	0.0497476	0.894328	0.397335	0.747561	up
gene27632	0.861239	0.980062	1.45072	14.1435	12.7933	14.9536	up
gene42997	6.3574	7.38523	7.77739	0.198118	0.878488	1.3837	down
gene26383	56.6171	60.1447	56.8156	0.176452	0	0	down
gene33811	0.146342	0.253303	0.238972	1.08423	1.04885	0.513887	up
gene11863	21.5598	21.6114	22.118	128.662	146.607	107.885	up
gene25606	0.819415	1.06407	1.01751	0.093683	0.210439	0.32429	down
gene17201	4.51757	6.4771	5.54663	0	0	0.0840138	down
gene24157	2.89768	2.80529	2.86784	0.0607152	0.0908246	0.0771321	down
Walnut_newGene_3307	0.574613	0.805612	0.52913	0	0	0	down
gene1526	7.85289	6.24649	7.50599	37.4861	22.4068	39.9934	up
gene21395	0	0	0.0688874	7.92714	9.98976	10.1161	up
gene22246	0.166903	0.349056	0.19258	62.1444	52.6718	63.8801	up
gene5185	0.871504	1.19137	0.715434	0	0	0	down
gene34547	16.2436	14.7367	12.4319	4.27422	3.54626	3.07465	down
gene25592	16.6959	17.4524	14.5626	1.77359	1.3092	1.37221	down
gene26908	0	0.0549759	0	1.47203	1.26835	0.580026	up
gene42157	525.696	533.852	516.747	82.4168	97.9192	82.8088	down
gene6789	1.58835	1.67459	2.16738	0.0670844	0.0248874	0	down
gene37127	25.7549	25.6052	24.2945	0.031776	0.118399	0.0278249	down
gene24632	124.474	118.241	121.387	0	0.147351	0.530352	down
gene35158	5.8383	5.85568	5.58725	1.58996	1.33844	1.26627	down
gene43181	6.72586	7.14668	6.50974	0.47887	0.591047	0.421747	down
gene27351	3.35552	1.86693	1.82017	0	0	0	down
gene42263	15.1223	15.9002	15.6121	4.08341	4.2838	3.08238	down
Walnut_newGene_5335	96.2863	92.0076	95.3365	9.88198	10.3008	10.0424	down
gene31425	1.88682	1.55452	1.70133	0.13353	0.293947	0.158027	down
gene40311	2.04873	1.75675	1.3719	0	0	0	down
gene4876	7.00794	8.07772	7.6414	0	0	0	down
gene23719	0.653434	1.20266	0.925628	0	0	0	down
gene11417	2.78492	2.35373	2.68412	0.764575	0.127728	0.222913	down
gene28092	8.18063	7.65079	7.99714	0	0.488818	0.0954248	down
gene35973	13.2888	14.7737	14.4102	4.29777	1.64454	3.65477	down
gene38274	61.9257	54.3925	56.1182	18.685	13.1742	10.1745	down
gene17120	0	0	0.121348	5.61654	5.29137	6.02406	up
gene28320	4.01344	3.78668	3.64429	16.7285	10.2871	20.0137	up
Walnut_newGene_5150	0	0	0	3.13918	6.04756	3.73942	up
gene24932	1.48669	1.49362	0.961627	0.144234	0.161256	0.0418841	down
gene33555	11.2379	10.6471	9.53914	1.9015	2.28768	1.46526	down
gene27210	4.75695	3.45225	5.09448	0	0.218614	0.0312448	down
gene19465	20.7859	20.2238	16.1587	1.14846	2.70537	1.15422	down
gene4940	79.6231	82.5594	77.4199	14.8284	6.93809	4.18222	down
gene21863	6.99658	6.29721	6.27325	1.29055	0.893693	0.741771	down
gene33035	8.93037	8.91917	10.2183	1.78474	1.53417	2.19251	down
gene138	13.809	12.121	13.7972	2.01157	1.50557	1.9691	down
gene21960	4.0705	2.5947	2.62047	66.6526	42.6561	66.6738	up
gene21581	5.48801	6.04752	5.43139	0.338257	0.108086	0.294863	down
gene24954	18.8167	16.1444	19.2018	0.996761	0.577468	0.568606	down
gene2514	0.497466	0.319182	0.398677	2.39537	2.7803	1.48318	up
gene14326	2.09721	1.92325	2.36021	0	0	0	down
gene39667	2.3536	1.84387	2.55064	0.255299	0.436368	0.445257	down
gene11883	2.46206	2.25427	2.8352	10.9235	10.2702	8.92017	up
gene7054	1.15616	1.31343	1.06743	0.0660347	0.0539757	0.029703	down
gene38595	2.78201	2.52717	3.10358	0.599927	0.686542	0.662032	down
gene1279	5.04624	4.45897	5.68413	0.806168	0.979809	0.528141	down
gene13415	43.7207	44.1296	43.1777	6.83354	5.86789	5.38948	down
gene37160	4.36679	5.40794	4.23857	0.322619	0.26845	0.253591	down
gene22245	17.8444	19.2621	18.0944	3.73703	2.77598	5.64099	down
gene1015	0.0619112	0.0639385	0.0905695	1.09388	1.33053	1.41732	up
gene19984	6.42462	5.01236	5.41732	24.6809	32.5457	24.3336	up
gene41696	21.59	20.492	21.1196	3.26649	6.67902	3.08649	down
gene31984	21.3672	17.2446	17.8942	0	0	0	down
gene38163	48.6197	48.0022	45.9975	1.20192	1.00816	0.86213	down
gene22596	0	0	0	0.456041	0.470545	0.393916	up
gene31197	1.86035	1.54873	1.40642	0.30003	0.423275	0.0775362	down
gene26739	2.81322	2.68629	3.20129	0.595515	1.41365	0.113397	down
Walnut_newGene_247	4.40897	7.19866	8.85199	0	0	0	down
gene40542	31.0967	34.3852	28.3642	3.72471	2.07604	3.99985	down
gene24076	0.608295	0.664855	0.75468	0.0779688	0.136159	0.0678504	down
gene5782	2.44485	3.19786	2.96503	0.441453	0.328995	0.390534	down
gene40944	21.7482	21.7119	24.5602	3.54808	2.21384	1.19339	down
gene40516	3.27492	2.42303	2.92966	14.0644	11.552	11.7879	up
gene7641	80.9636	79.5408	73.4996	1.27283	1.06064	0.343265	down
gene13844	0	0	0.0776113	5.06996	3.48204	3.28842	up
gene13461	3.75513	3.7892	2.93581	0.655631	1.11112	0.438342	down
gene13505	0	0	0	0.985617	0.724882	0.697648	up
gene14964	0.644719	0.762812	0.141352	4.14515	4.50601	3.08276	up
gene29494	0.351989	0.311182	0.251494	0.0127722	0	0	down
gene13162	0.397752	0.43419	0.267873	0.0327708	0.104738	0.0978817	down
Walnut_newGene_6904	0.64331	0.784625	0.703842	7.12543	6.17623	7.75848	up
gene23929	0	0	0.0544037	10.3409	11.0035	13.4596	up
gene27096	14.6801	15.5015	13.6861	1.18051	0.812444	0.983324	down
gene3149	5.00087	4.31553	4.3862	0.533201	0.297286	0.198721	down
gene15943	2.43992	2.22277	1.91602	0.043508	0	0.0371894	down
gene5569	68.9035	67.4641	66.8784	13.7961	10.0216	12.4373	down
gene13487	0.520555	0.440306	0.517768	0.152416	0.016047	0.0661023	down
gene10419	1.09211	1.02149	1.1167	6.19824	4.3486	4.10428	up
gene13256	98.7941	102.554	101.237	2.67273	4.39435	3.09659	down
gene27867	1.16023	1.47701	1.39751	0.595627	0.253664	0.35606	down
gene35583	16.6332	18.9417	20.2879	1.33356	0.326777	0.888576	down
gene34992	1.54784	1.12972	1.7746	0.434275	0.141347	0.0919845	down
gene24631	2.41972	4.53878	3.1098	0	0	0	down
gene14597	40.6347	41.1839	39.0318	215.911	200.509	256.631	up
gene6567	3.51016	2.13856	3.32406	0.10592	0.316812	0.122024	down
gene41518	3.37116	3.70305	3.48516	0.763425	0.352337	0.567522	down
gene17024	1.67633	1.64438	1.46229	0	0	0	down
gene20032	2.30487	2.22701	2.29045	0	0	0.0469387	down
gene43288	35.7856	32.2674	34.4191	4.95754	4.85953	6.87508	down
gene36507	87.3916	86.371	85.8249	14.3895	12.0778	13.4887	down
gene5081	9.96576	9.97157	10.1685	0	0	0	down
gene39416	14.8038	11.8095	12.9932	1.91375	4.4054	1.22942	down
gene22937	54.9149	52.7934	45.9261	363.669	299.418	366.395	up
gene14136	0.0177968	0.0544465	0.0172863	0.51317	0.163224	0.338783	up
gene14596	189.049	191.042	190.037	5.71542	6.53215	4.30334	down
gene27703	5.40189	6.1977	4.1079	0	0.0691835	0.492573	down
Walnut_newGene_1409	3.13674	3.72428	3.63951	0	0	0	down
gene8316	6.60839	6.54336	5.7772	1.40528	0.894127	1.0365	down
gene37139	0.0762645	0.0155265	0.0593589	1.46625	1.66045	0.812452	up
gene21580	5.06919	5.66033	4.96198	0	0	0	down
gene8397	6.55796	4.44854	3.83947	1.22625	0.764362	0.989993	down
gene21666	1.38672	1.79421	1.85425	0.124365	0	0.0850354	down
gene8771	0	1.34e-22	3.1e-33	1.15455	1.05016	0.981307	up
gene26569	0.150508	0.0305305	0	14.8975	17.2002	16.5848	up
gene2424	286.797	285.871	289.138	13.6824	23.776	9.62019	down
gene37243	2.81889	2.3626	3.20935	0.109463	0.0205341	0	down
gene42282	1818.68	1867.94	1722.25	247.915	76.7033	322.193	down
gene2817	0.0740905	0.0376578	0	0.527941	0.646216	0.796602	up
Walnut_newGene_7323	23.424	14.364	15.2428	0	0	0	down
gene9324	18.0671	19.2581	19.0407	4.38421	1.99599	4.34619	down
gene8506	13.7808	16.4194	12.1155	74.4035	58.954	66.1785	up
Walnut_newGene_2823	0	0	0	2.42965	1.56737	3.1431	up
gene5054	93.1118	97.5699	95.0572	0.871033	3.94052	1.25357	down
gene10342	72.5379	69.6367	77.0233	3.88456	8.55235	3.94214	down
Walnut_newGene_1941	0.285867	0.747982	0.53766	5.53605	3.6203	4.57324	up
gene23125	2.05086	2.16169	3.08607	0.452447	0.797796	0.46006	down
gene33529	8.04939	6.52047	5.61871	0.142637	0.0530515	0.121215	down
gene34738	0.0553991	0	0.110565	0.688588	0.686886	0.976562	up
Walnut_newGene_7166	0	0	0.050031	5.42024	8.08262	6.45051	up
gene22834	401.326	398.718	387.67	47.6915	72.271	27.4276	down
gene26294	6.89564	7.12428	8.05204	0.452219	0.944657	0.241067	down
gene9372	0.814684	1.77477	1.79623	0	0	0.174265	down
gene34799	3.75073	4.05746	3.54571	0	0	0	down
Walnut_newGene_6841	0.824506	0.155974	0.494958	3.38617	1.98771	2.16064	up
gene3118	0.381805	0.584498	0.648804	4.43106	3.56904	3.29202	up
gene7789	3.18695	3.5172	3.01213	0.0923412	0.361374	0.222675	down
gene5027	337.715	343.229	337.994	125.324	26.377	46.4467	down
gene34197	1.65242	3.03757	3.09538	0	0	0	down
gene6219	6.91608	6.67567	6.24985	0.994058	0.720916	0.532171	down
gene16030	3.66291	3.28852	3.52137	0.687351	0.399245	0.616012	down
gene14374	193.915	255.657	245.129	29.8676	16.0281	31.8326	down
gene14039	13.1759	10.7875	11.4865	1.25518	2.41676	2.88261	down
gene39346	15.9941	15.7226	15.3411	0.683669	0.447576	0.465753	down
gene13012	68.9818	70.2952	70.9523	4.50487	3.73712	3.28906	down
gene28366	13.805	14.1934	15.7083	1.5233	0.678785	1.0845	down
gene36310	6.97839	6.29139	6.51057	0.174892	0.273322	0.451102	down
gene211	4.15458	4.38901	2.8708	0.83543	1.03239	0.481731	down
gene22966	2.36224	1.97095	2.74033	0	0	0.268707	down
gene39073	5.91426	5.92084	5.67457	0.498504	0.712751	0.803178	down
gene21850	2.53129	1.98312	2.03572	0.357796	0.0626842	0.199061	down
gene42017	61.1672	66.1496	64.3637	0.0619676	0.0308329	0.223902	down
Walnut_newGene_121	0	0	0	3.04367	2.57337	3.36316	up
gene12534	14.7759	14.7078	15.5038	1.38014	2.68546	1.90517	down
gene41936	0	0	0	8.48927	11.7467	13.541	up
gene35640	3.10419	3.63015	2.66663	0.361528	0.676542	0.220535	down
gene36520	6.68074	6.33802	6.13089	24.4225	28.0194	27.3457	up
gene15804	8.9633	7.66341	6.97918	0.346361	0.463608	0.670244	down
gene2270	3.0496	3.81679	3.17452	0.175123	0.217579	0.0384308	down
gene1835	1.5623	1.08171	0.938047	0	0	0	down
gene1086	2.54192	3.89188	3.13502	0.245269	0.47756	0.0859124	down
gene25123	143.513	144.237	142.91	17.0486	15.8407	15.1654	down
gene7005	13.1181	18.2259	17.1437	1.36709	2.39181	3.05785	down
gene27321	0.857581	0.689971	1.00635	0	0	0.102836	down
gene2777	3.99644	2.95329	1.71015	0.331016	0.599086	0.124518	down
gene25040	0	0	0	1.46216	1.5668	2.12956	up
gene33543	0.0506071	0.10611	0.147538	7.33069	2.35042	2.85821	up
gene17626	4.6052	3.4175	4.76516	0	0	0	down
gene21335	0.649908	0.586493	0.775172	22.6555	26.0732	25.7285	up
gene27846	0.524145	0.224954	0.471064	3.08305	2.70774	2.10238	up
gene1216	2.98824	2.85913	2.53871	0.536749	0.514652	0.549863	down
gene2282	1.18156	0.743136	1.97312	0.0462103	0.034914	0.0836571	down
gene26123	1.75993	1.53153	1.61779	0.134955	0.390956	0.0486598	down
gene21576	3.1258	2.29783	2.43529	0	0	0	down
gene20998	1.50143	1.89939	1.09219	0	0.380382	0.256018	down
gene38143	3.10689	4.73278	5.26196	0.76522	1.09222	0.948757	down
gene9504	59.2636	56.9112	59.5684	5.66899	10.6838	6.00505	down
Walnut_newGene_1199	5.43496	5.22013	5.72384	0	0	0	down
gene7886	2.54341	2.67964	3.12305	0.446292	0.84887	0.22802	down
gene13480	0.352769	0.0609103	0.113792	3.55936	3.10549	2.40753	up
Walnut_newGene_6769	3.43e-05	0	0	4.42764	3.11033	2.79234	up
gene9918	287.784	285.826	282.431	18.8775	23.5449	15.5988	down
gene28702	1.60394	0.754318	1.81787	0.0485331	0.0364311	0.0211688	down
gene33065	4.51555	5.39656	3.70229	0.27677	0.262918	0.32917	down
Walnut_newGene_165	0.455404	0.770611	0.220448	2.83368	1.50952	2.72313	up
gene23496	5.11167	5.88033	5.30269	0	0	0.0190429	down
gene5384	21.4049	19.8467	21.6603	0	0	0	down
gene19034	2.96712	3.22789	2.51968	0.710501	0.0586349	0.411367	down
gene26973	18.0052	16.1944	15.4385	0.886467	0.564993	0.376314	down
gene5400	0.179051	0.312551	0.370528	7.07193	6.56032	8.31419	up
Walnut_newGene_6141	0.145407	0.292226	0.0472526	2.54464	2.27496	2.72371	up
gene34484	138.613	141.898	140.557	0	0	0.118811	down
gene30216	0	0	0	2.67172	2.70028	1.82222	up
gene12732	9.67588	11.0532	11.3841	0.075334	0	0.0660151	down
gene22585	0.114067	0.150272	0.056909	1.42508	1.51803	1.22125	up
gene40635	105.661	111.135	103.568	20.4412	24.3301	23.0254	down
gene41329	0	0	0.034948	2.12776	1.83579	2.71331	up
gene22286	3.79323	3.47599	3.59771	13.3273	19.4339	13.515	up
gene21853	1.16038	0.891537	0.515237	4.49491	3.23257	4.2558	up
gene5390	17.5169	19.2399	17.4843	2.17613	2.48482	2.36767	down
gene40174	596.491	513.682	566.834	50.8226	73.4199	56.8042	down
Walnut_newGene_3248	1.80282	3.37481	3.48384	18.7513	13.9611	22.306	up
gene86	0.44305	0.177433	0.341474	2.13801	1.31391	1.18764	up
gene24607	9.82173	8.52884	12.9154	39.9203	49.3902	40.0822	up
gene23516	6.75705	7.3751	8.062	0.068352	0	0.0620689	down
gene20948	2.18866	2.57882	2.70271	0	0	0	down
gene41290	6.75212	6.89176	6.87408	2.4596	0.605801	0.930909	down
gene8904	125.716	135.71	124.008	18.3159	34.4368	20.3101	down
gene7351	0.0439494	0.061253	0.031038	1.49961	0.617762	1.12635	up
gene31229	393.932	395.233	392.504	92.3173	88.5737	93.7297	down
gene37890	2.74844	2.50155	1.45932	12.4727	14.8157	16.7747	up
gene15519	1.48766	1.20827	1.21724	0.235787	0.05826	0.13423	down
gene35882	1.25192	0.694531	0.850804	0.832887	0.0908258	0.0856678	down
gene28161	7.00217	5.20829	6.80607	35.3717	24.2576	29.4856	up
gene22156	0.0671114	0.0225613	0.0717749	0.732091	0.406354	0.378602	up
gene28843	2.83591	2.48751	2.51874	0.570512	0.568271	0.528896	down
gene27964	9.5876	9.57587	11.0275	0.180709	0.0351709	0.0405876	down
gene7201	12.5426	10.6663	9.54393	0.237559	0.266162	0.507967	down
gene3495	61.7675	61.315	58.8116	3.69918	4.18278	3.82792	down
gene14051	4.8962	4.25125	4.77668	19.2906	18.9663	21.6264	up
gene40026	1.18823	1.22874	0.688961	0	0	0	down
gene12345	46.5712	45.9674	43.412	9.64536	10.3977	10.5603	down
gene7780	20.2005	19.7157	25.4615	6.16446	4.8113	5.64334	down
gene5025	106.368	108.839	106.899	1.83173	7.35459	1.51396	down
gene4670	43.445	40.5508	41.4534	7.99474	6.70391	6.61252	down
gene27169	0	0.0457824	0.0436223	3.22936	1.1393	2.11193	up
gene8082	1.07688	1.0146	0.878017	0.0547635	0.202147	5.89e-08	down
gene8957	26.1533	23.9415	27.3872	0.455787	0.436056	0.220744	down
gene31107	79.8325	85.1072	74.4899	280.662	344.905	295.076	up
gene14922	5.56808	8.26026	7.28449	1.44841	1.62675	2.74943	down
gene40544	145.549	144.405	145.012	20.0439	10.2125	12.9346	down
gene42477	11.3455	11.5695	12.0974	0.098838	0.286365	0.0855985	down
gene11554	16.8399	15.986	15.6518	71.5879	75.1631	75.3262	up
Walnut_newGene_460	0	0	0	1.33583	1.50776	1.84346	up
Walnut_newGene_323	0.668112	0.609117	0.780756	0.0192808	0.171086	0.114448	down
gene24449	4.11386	2.62035	2.85579	27.9032	19.6684	24.7088	up
gene7012	3.40618	3.79462	2.77212	0	0.0359493	0.0422436	down
gene38426	31.8574	35.2416	29.4062	1.98983	1.10778	1.16821	down
gene36587	2.33273	2.43179	2.4609	13.098	13.7178	14.0707	up
Walnut_newGene_4454	156.32	131.384	135.021	0	0	0	down
gene13880	3.08265	2.36805	3.85516	0.317689	0.193862	0.0361023	down
gene13677	1.40888	0.779433	0.865035	0	0	0	down
gene28266	131.842	128.684	132.464	28.4394	29.278	31.8522	down
gene35387	1.98264	2.50722	1.92265	0	0	0	down
gene20068	37.6934	43.426	39.137	6.19334	7.3453	7.15624	down
gene24868	0.50146	9.16e-39	0.480308	10.0336	9.81318	8.99712	up
gene6526	0.0974504	0.199995	0.188597	0.966484	0.719147	1.03539	up
Walnut_newGene_491	1.36753	0.961304	1.81058	1.55e-63	1.11e-36	3.27e-44	down
gene34962	4.63316	4.78138	5.08741	0.326109	0.661115	0.406394	down
gene24618	0.355228	0.458978	0.174455	2.14641	2.27073	1.42298	up
gene8911	2.26409	1.45266	1.23759	9.68623	7.35542	9.12629	up
gene5061	11.025	10.7579	10.7554	93.5652	89.0276	94.4158	up
gene14186	1.33807	0.978575	0.886869	0.0393485	0.0439652	0.0338404	down
gene38061	24.8031	20.8238	28.8791	0	0	0	down
gene32030	1.72397	1.20173	1.51454	0.403897	0.374314	0.269319	down
gene24993	147.674	149.524	147.618	20.5375	18.6174	19.8839	down
gene21501	0.628388	0.44118	0.607305	2.38971	1.63634	2.97387	up
gene38358	3.82179	3.26151	4.15133	0.798605	0.269723	0.673301	down
gene40072	3.09717	3.05767	2.75573	0	0	0.0592727	down
gene12365	2.18894	1.58132	2.0725	0.222553	0.616111	0.13773	down
gene36606	2.24391	1.66156	1.76884	0.361076	0.433269	0.587917	down
gene22915	17.8205	17.415	16.9799	1.21918	1.28467	1.11475	down
gene21021	2.43141	2.59741	2.57019	0.287166	0.533108	0.337724	down
gene27344	13.45	14.5801	13.6096	1.98791	1.54516	1.35039	down
gene5398	0.106124	0	0.025631	0.819651	1.26702	0.772679	up
gene11649	2.62463	2.91497	3.46683	0.477925	0.448708	0.141195	down
gene6389	0.72539	0.563952	0.478018	0	0	0	down
gene38961	13.1835	14.6172	14.076	0.748979	1.48997	0.783949	down
gene39127	0.426436	0.313137	1.11945	13.8228	8.25635	8.0459	up
gene41699	119.515	115.005	113.251	15.894	21.3397	15.5099	down
gene5010	9.58881	9.326	8.55396	2.45889	1.74011	2.16262	down
gene36426	3.04621	2.71808	2.75135	0.218773	0.751131	0.313383	down
gene14083	0.537927	0.784566	0.690971	2.23462	2.83637	2.98107	up
gene16331	4.28541	5.46081	4.57464	0.0455929	0	0.0196605	down
gene33316	3.84005	3.80853	2.97711	17.1289	16.0846	15.9674	up
gene42645	1.22104	1.44051	1.45281	24.589	10.0822	11.3215	up
gene37440	316.33	310.848	307.865	36.0964	53.2532	60.9285	down
gene4213	0	0.0220547	0.0209352	2.12846	1.41111	1.50222	up
gene42002	117.791	129.912	122.507	7.45029	4.07198	7.31643	down
gene24613	2.44485	2.02544	1.82081	0	0	0	down
gene169	6.14001	6.07113	5.04362	0.0553995	0	0.248722	down
gene41966	1.30247	1.34622	0.828977	0.10842	0.0819166	0	down
gene7897	0.046566	0	0.0792856	94.1923	100.061	103.373	up
gene19073	9.13737	10.5328	8.09235	0	0	0	down
gene17753	0.119581	0.260145	0.0604594	1.00831	1.66792	1.13841	up
gene43052	0	0	0	6.19702	3.54196	3.85099	up
gene5255	69.0559	66.0461	65.2941	0	0	0	down
gene40776	7.25434	11.3992	9.42431	0	0.131776	0	down
gene3000	60.0588	58.7113	56.7301	7.17927	16.4846	7.96925	down
gene14828	15.3316	16.3461	14.3089	2.19221	1.04461	2.02965	down
gene2089	42.3241	43.3149	43.2122	3.72847	3.87652	4.07462	down
gene41751	0.59432	0.72492	0.650172	0	0	0	down
gene31668	33.734	30.6932	30.4126	1.70635	4.25445	3.53289	down
gene37336	0.0514653	0.0264451	0.0502553	2.5986	1.45599	1.41156	up
gene25943	23.0938	19.6416	19.7773	3.98248	4.83594	4.79526	down
gene5918	2.42804	2.82972	1.85685	18.1292	13.0869	17.4683	up
gene16577	1.08218	1.13585	1.02984	0	0	0	down
gene40685	0.167315	0.0871009	0.025352	1.32144	1.35722	1.5144	up
gene36699	28.8369	31.8058	28.1884	3.12784	5.46675	2.19388	down
gene28717	3.25193	3.17608	2.8138	0	0.021787	0	down
gene386	2.39351	2.77251	2.71903	0.247198	0.391772	0.263668	down
gene20359	0.594121	0.379437	0.874679	5.29892	2.29185	2.85455	up
gene31973	6.58077	5.47242	5.53895	0.30965	0.0289781	0.134566	down
gene36561	12.1619	11.5341	11.7158	1.89613	2.8363	2.30024	down
gene12366	108.843	111.681	107.028	12.4261	5.42078	13.8115	down
gene2519	2.6246	4.04356	2.54382	0.167402	1.36394	0.542277	down
gene41757	47.9492	49.5124	52.9199	0.484628	0.712041	0.656194	down
gene34859	2.42848	2.1995	2.29876	0.290435	0.231213	0.0898268	down
gene29495	0	0.0190546	0	2.22412	0.87527	2.18373	up
gene29672	5.64423	5.75028	5.235	0.238827	0.482286	0.472975	down
gene22836	40.0871	42.1706	37.9717	10.5684	11.2134	4.86949	down
gene36516	0.744409	0.518808	0.653489	0.0972937	0.175275	0.0677406	down
gene12627	232.362	221.612	216.602	63.1205	46.4537	51.2275	down
gene4642	2.42087	2.6562	2.4066	0	0.0319664	0	down
gene25181	5.00766	4.25944	3.44902	0.071941	0.0802451	0.0938027	down
gene29261	8.59709	8.73037	8.95313	1.2927	1.09853	0.931403	down
gene40014	6.7179	6.24723	6.67139	0.538938	0.449776	0.380322	down
gene42577	215.771	212.169	205.231	20.9032	9.0971	10.8795	down
gene14198	0.919385	0.807304	0.981829	4.01888	4.88271	3.90946	up
gene12136	70.1819	73.0444	70.8061	9.61967	19.4294	9.68443	down
gene12063	0.250689	0.235448	0.22517	0.0273079	0.0205309	0.00792965	down
gene10604	0.0283963	0.0595655	0.0282861	1.48563	0.73931	0.610301	up
Walnut_newGene_5558	5.67938	3.47603	6.10044	0.70711	0.61645	0.633495	down
Walnut_newGene_6186	1.72359	0.707148	2.19757	5.50453	4.82393	4.78194	up
gene38759	16.8607	16.8049	18.1661	0.963565	0.933276	0.391452	down
gene15038	42.7667	40.7753	44.9934	1.17796	1.76021	1.96244	down
gene15796	38.4092	32.5867	33.4839	346.978	211.634	353.101	up
gene38081	0.738982	0.750932	1.0439	0.126872	0.113282	0.0433987	down
gene21613	2.31159	2.77837	2.41005	0.358338	1.17818	0.168155	down
gene42217	0.787902	1.33354	1.52669	0	0	0.0215294	down
gene15222	0.759162	0.995007	0.590602	0.0541451	0.133598	0	down
gene24057	2.32828	3.18238	2.52904	0	0	0.0621564	down
gene19201	14.2661	16.8041	10.1273	0	0	0	down
gene13096	22.4793	21.673	20.9181	0.504076	1.00491	1.04316	down
gene29352	34.0371	39.212	40.2379	0	0.221414	0.296901	down
gene21303	3.72935	3.63838	3.2538	0	0	0.0766009	down
gene25776	30.1127	34.9619	28.1908	5.16638	3.44692	4.99559	down
gene39690	31.8859	32.3933	31.5475	8.65521	6.92122	7.04266	down
gene24809	0	0	0	8.34754	5.14378	7.82492	up
gene30911	0	0	0	0.80551	0.698476	0.70739	up
gene19748	0.630724	0.791496	0.817244	0	0	0	down
gene3937	2.22819	1.41722	3.89615	14.5044	14.179	17.3604	up
gene15809	2.98427	4.05893	2.88652	1.04587	0.339538	0.674972	down
gene36251	4.26053	4.27708	4.86247	0	0	0	down
gene24988	38.1948	38.9254	35.489	204.987	141.508	248.904	up
gene18774	13.6273	11.1953	11.5535	0.690426	2.76315	0.405137	down
gene16050	107.172	97.7289	102.511	0.164736	0.183339	0.140162	down
gene29859	18.1021	18.4859	18.3352	0.0483664	0.343433	0	down
gene32443	5.28355	6.15903	5.71851	0.243267	0.168434	0.163989	down
gene8774	237.143	236.548	233.15	5.46131	5.4011	6.43074	down
gene2493	16.8702	15.5737	15.184	0.393109	0.331806	0.821291	down
gene17895	9.3907	10.6585	9.23253	0	0	0	down
Walnut_newGene_4889	0.130042	0.0667078	0.159321	1.10432	0.885917	1.11806	up
gene33456	0.529444	0.243248	0.173052	1.85265	2.13547	2.37921	up
gene3973	0.0170064	0.104928	0.0663244	0.549147	0.246455	0.594147	up
gene17429	3.40362	3.2755	3.87035	0	0	0	down
gene8666	0.574523	0.763688	1.05252	0.258305	0.136121	0.148939	down
gene4126	40.8035	42.2022	36.6843	0.25208	2.07364	0.657935	down
gene16092	3.72597	4.61852	3.88726	0.734694	0.54368	0.773619	down
gene41886	0.110105	0.163811	0.263468	2.33938	2.72454	3.01739	up
gene32494	8.33743	8.43751	6.51799	0	0.0623063	0	down
gene3624	4.03799	2.81841	2.98494	0.100471	0.484117	0.432199	down
gene28018	22.6857	25.4699	29.2431	0	0	0	down
gene29910	21.6085	22.0337	20.2544	1.63672	0.301222	0.437065	down
gene5912	7.212	6.44717	5.90697	0.0815127	0	0.0356832	down
gene3659	0.696393	0.608807	0.14512	1.75378	2.76317	3.17831	up
gene16802	11.3282	11.2242	9.76572	0.368826	0.412738	0.365172	down
gene8294	13.6766	13.9382	14.825	4.96213	1.21621	2.28272	down
gene24140	154.442	154.825	157.976	15.7786	14.4966	14.5598	down
gene16591	65.7666	69.0392	67.3586	17.1532	13.7913	12.2117	down
gene42511	15.3665	15.2248	16.4989	104.587	86.3011	106.565	up
gene33826	12.4033	13.1872	12.5105	1.35915	1.05216	1.043	down
gene38641	1.60115	0.579898	0.384122	3.99608	3.08852	3.94726	up
gene14487	0.605584	0.498334	1.18276	0	0.0632486	0.0349552	down
gene9082	19.2867	20.9182	17.6203	0	0	0.183005	down
gene21491	1.03377	1.52073	1.2224	6.8395	7.1655	8.74881	up
gene22087	0	0	0	46.7802	49.6161	53.9553	up
gene38963	126.303	117.575	118.064	15.9239	29.0012	20.0118	down
gene24830	0.908082	0.158968	0	2.41904	2.24113	2.74814	up
gene25809	172.483	177.574	178.179	4.71989	2.52807	2.96938	down
gene32396	2.12509	1.7223	2.66021	0.0707384	0.131473	0.120676	down
Walnut_newGene_6879	0.118395	0.141725	0.13746	1.85425	1.62013	1.68795	up
gene4896	355.306	323.366	357.369	33.6692	24.3002	24.7056	down
gene33394	3.96481	2.31871	3.95085	15.7855	12.9823	22.8375	up
gene21943	361.271	368.777	350.756	16.3363	21.2785	17.4455	down
gene11678	0.454513	0.464911	0.409869	1.93581	1.89477	2.2843	up
gene5275	34.6425	31.5018	32.3377	5.89132	6.85977	5.82966	down
gene30420	110.567	105.135	103.546	13.9741	5.72938	7.67225	down
gene32736	10.3508	9.89973	11.7123	53.7041	69.2243	50.9815	up
gene39555	2.10429	2.54264	3.32825	0	0	0	down
gene41662	383.048	344.491	349.741	5.10096	9.84062	8.06839	down
gene22231	6.7575	5.34369	5.06032	95.1237	36.4829	63.902	up
gene30901	2.92495	4.52985	3.85662	0.788864	0.313847	0.375277	down
gene26838	3.1972	3.35988	2.63385	0.306981	1.01187	0.679004	down
gene2012	0.546911	0.691939	0.652736	0.117202	0.0287881	0.0667733	down
gene24994	14.05	13.0806	13.3001	0.879251	1.96375	1.61513	down
gene25909	0.783414	0.419399	0.875436	3.85338	3.51233	3.93156	up
gene8093	1.22141	1.07812	0.958827	0.27409	0.207099	0.341678	down
gene29794	842.553	849.734	823.196	142.619	218.033	118.717	down
gene8167	19.4335	17.445	18.0776	0.046956	0.0349719	0.0407841	down
gene18320	3.99343	3.71283	3.88618	0.0496186	0.147151	0.168209	down
gene9034	21.7781	21.2191	18.3978	2.03187	4.00476	3.76529	down
gene9638	270.249	266.675	248.834	39.3907	93.1215	39.4622	down
gene40189	7.05945	8.32315	7.93113	2.26403	2.60688	2.39385	down
Walnut_newGene_4084	10.7495	10.7045	8.43445	0.257151	1.02342	1.13481	down
gene26389	20.9195	22.5447	21.7642	0	0.0237991	0	down
gene12653	1.05856	1.13266	0.939312	0.144797	0.107844	0.093294	down
gene1067	0.227077	0.412471	0	1.65324	0.770349	1.616	up
gene3709	0	0	0	1.3257	1.11566	2.02132	up
gene26528	0.0432596	0.0880702	0.209543	0.75161	1.31899	0.555843	up
gene7045	262.67	259.91	260.546	29.5168	31.7735	27.0547	down
gene35568	57.8021	57.8804	57.7519	3.08129	2.73388	1.77261	down
gene21783	1.49792	1.78346	1.57173	0.333914	0.346669	0.224637	down
gene32727	5.43036	5.63757	6.3228	0	0.0718131	0.573597	down
gene33100	5.14644	5.35478	4.91646	0	0	0	down
gene41663	793.783	780.366	760.18	69.8014	100.711	70.2114	down
gene19120	0.147222	0	0.276936	14.3162	16.0892	12.3925	up
gene31260	25.3173	25.8753	23.9542	4.29613	3.14486	2.08847	down
gene1423	284.285	294.48	289.387	48.7487	73.3495	40.0612	down
gene341	191.211	208.532	190.652	2.68504	17.4991	3.24618	down
gene3517	13.3778	14.2885	12.0797	0.197424	0.221429	0.0216386	down
Walnut_newGene_5049	28.0702	34.6416	26.2304	115.331	129.139	157.491	up
gene14823	8.59902	6.70672	8.06371	0.446469	0.0602375	0.174926	down
gene36546	135.055	139.666	141.104	4.88337	13.4814	5.79565	down
gene11908	2.49103	3.13985	3.40512	0.609112	0.406104	0.520825	down
Walnut_newGene_4745	1.22469	1.90348	1.40341	8.36964	6.38463	7.56443	up
gene2512	2.53589	4.84113	3.97636	0	0	0.0839399	down
gene35322	5.85453	4.69906	4.28903	12.3614	32.1864	28.5249	up
gene23702	10.8074	8.6956	10.4669	0	0.0553143	0	down
gene41321	0.149777	0.302647	0.0725913	2.98742	4.03521	3.29783	up
gene22897	2.18822	2.37533	2.41143	0.338118	0.621127	0.360997	down
gene39598	59.7063	60.4548	55.3117	7.11785	4.08275	4.0643	down
gene38880	50.7216	59.5748	51.1726	0.246181	0.440182	0.640177	down
Walnut_newGene_6055	0.322769	0.355132	0	10.9832	5.46494	7.96578	up
gene16026	0	0	0	1.43401	3.77267	2.40794	up
gene38701	0	0	0	2.47975	1.94845	2.48031	up
gene32061	16.5619	16.4028	15.0641	1.31545	0.51727	0.765754	down
gene13876	35.9337	31.4733	31.3556	1.35437	2.36804	1.28054	down
gene31665	48.8471	53.9255	48.5964	7.8678	11.5147	13.1229	down
Walnut_newGene_677	0.702414	0.64757	0.64849	0.0159853	0.0597331	0.0418154	down
gene14093	68.2839	66.7162	69.2627	17.7932	15.5682	17.2239	down
gene14808	1.94896	2.10714	2.38266	0	0.0842596	0	down
gene31543	6.10906	5.93727	7.55281	0.231756	0.0341578	0.231659	down
gene40603	0.625857	0.879298	0.742022	0.229534	0.0496073	0.116959	down
gene9746	21.4151	22.4106	20.6616	3.54085	2.99708	2.56878	down
gene13005	0.953307	0.695542	0.735131	0.0419834	0.0781293	0.0736352	down
gene350	0.258356	0.297586	0.220521	1.26647	1.38312	1.77079	up
gene39060	2.16623	1.83354	1.77709	11.0252	11.0989	10.9522	up
gene32454	0.589572	0.503149	0.141582	9.19841	5.85675	9.61649	up
gene5257	51.1755	50.0772	48.6023	3.31244	2.76569	3.20934	down
gene12022	0.121726	0.0621988	0.0585396	1.07027	1.28494	1.48593	up
gene32890	46.8726	56.4848	54.2718	4.94203	2.12822	1.0459	down
gene33541	1.98312	2.51443	2.36016	17.6122	8.33109	12.0074	up
gene20204	4.85945	3.029	5.68963	0.399918	0.977973	0.897347	down
gene38599	1.85138	1.20826	1.55907	0	0	0	down
gene37151	1.79605	1.97399	1.83942	0.132643	0.296332	0.189692	down
gene15776	2.44806	2.09221	2.11729	0.333272	0.0358106	0.166685	down
gene8013	0.751222	1.41907	1.09005	0	0	0	down
gene3261	11.1699	10.839	8.89803	0.0541621	0.0414081	0	down
gene37936	35.1207	32.3834	30.3939	0.0517551	0.114905	0.0876665	down
gene16694	10.3574	14.7632	12.1736	0.0412561	0.0307582	0	down
gene29731	23.4745	25.1114	24.5492	0.153899	0.115712	0.0675652	down
gene29142	3.24311	3.93582	3.29569	0.488781	0.547231	0.363526	down
gene24085	4.31583	3.42771	3.29903	1.89032	0.462738	0.356426	down
gene15279	506.553	536.813	520.79	35.6272	53.5923	33.8137	down
Walnut_newGene_591	0.541226	0.1583	0.414653	10.6904	7.72788	10.2071	up
gene35725	0.853077	0.788023	1.06955	0	0	0	down
gene23367	2.89127	3.24368	2.86872	0.0607085	0.0456774	0	down
gene22215	4.11786	4.31722	3.85926	0.866539	0.918821	0.659797	down
gene4769	3.8561	4.25087	4.45283	0	0	0.135422	down
gene24309	684.773	707.069	663.687	19.482	21.5393	11.9874	down
gene6677	0.1001	0.131619	0.173673	1.29439	2.76397	1.10519	up
gene17445	0.369817	0.376035	0.357823	1.80922	1.56776	1.32086	up
gene20615	0.721436	0.739546	0.706609	0	0	0	down
gene21517	2.93013	2.76959	4.29645	0	0	0	down
gene8732	7.69558	7.68058	7.75305	48.3129	26.7825	45.7666	up
gene7242	11.8538	13.5168	12.63	3.17895	3.60525	2.41662	down
gene36564	28.3925	29.5232	26.1529	1.79342	2.08425	1.89052	down
gene38248	200.911	197.564	140.661	11.3692	16.4143	12.366	down
gene32973	0.555833	1.03245	0.930068	3.83496	3.24352	4.15893	up
Walnut_newGene_1713	0.875253	1.32657	0.651331	7.70196	3.91148	4.70837	up
gene37347	3.59797	3.61578	4.95208	0.748963	0.561013	0.292326	down
gene11575	5.44807	4.89842	4.27597	0.416104	0.680766	0.16033	down
gene32725	0.116349	0.0843596	0.128406	1.19806	1.57869	0.775046	up
Walnut_newGene_1731	2.10378	2.91206	1.60358	9.02729	16.2073	10.9844	up
gene10101	0.485523	0.722366	1.59451	0.121696	0.0915771	0.0891241	down
gene9340	3.04335	3.16154	3.02214	0.129088	0.472354	0.353033	down
gene15857	3.31863	2.97903	4.01997	0.831351	0.699923	0.714009	down
gene20485	5.19363	5.1365	4.48034	0.255392	0.516888	0.658926	down
gene1051	320.612	328.8	309.195	40.7613	50.6258	45.0968	down
gene25409	5.73322	4.99267	4.95813	0.504169	0.294082	0.283897	down
gene21357	3.87648	3.57665	3.34154	0	0	0	down
gene8875	59.8939	59.6258	60.439	8.71347	7.12335	7.87865	down
gene6591	15.857	17.3544	15.0086	76.7856	53.9648	64.7249	up
Walnut_newGene_4069	0	0	0	4.01789	4.16575	3.95794	up
gene37943	73.9886	75.6264	77.5218	1.83265	4.52278	2.06756	down
Walnut_newGene_990	3.92041	3.69143	3.91967	0.481664	0.651893	0.278116	down
Walnut_newGene_2911	4.4247	3.87506	4.67976	0	0	0	down
gene2254	5.84294	5.35616	5.43483	0.660405	0.884683	0.634129	down
gene32465	3.30128	2.2549	3.32355	0.0251708	0.0177394	0.0433253	down
gene22428	5.4776	2.38536	4.53971	0.0661358	0.690934	0.342431	down
gene6569	1.17125	0.85452	0.985062	0.117873	0.0582345	0.104042	down
gene2982	3.99981	3.29627	3.21977	0.145372	0.103247	0	down
gene10953	84.8377	88.3168	84.8976	13.5955	10.4141	10.5065	down
gene18426	0.966732	0.528483	0.663457	12.7655	12.822	14.7491	up
gene7167	2.32413	2.06295	3.18516	0.568527	0.426393	0.610336	down
gene5350	41.8764	41.0079	37.8526	9.39524	9.91641	8.62454	down
gene15952	1.08265	1.31489	0.987125	0.163464	0.387359	0.107707	down
gene11849	232.345	237.314	228.526	37.5749	32.191	25.819	down
gene38458	4.13615	5.69203	5.48383	0.0888001	0.157591	0.281002	down
gene29471	10.6984	11.9376	10.8106	1.07951	3.15528	1.05239	down
gene5163	1.1865	1.38943	1.33976	0	0.0417428	0	down
gene3071	13.6928	15.0401	13.9297	90.7999	59.4642	59.0486	up
gene26887	5.77301	6.21079	5.65438	1.54836	0.343692	1.26365	down
gene589	1.8711	2.36964	2.2278	0.0274089	0.121586	0.166119	down
gene7399	0.0334252	0.204896	0.130997	1.23256	0.781118	0.643359	up
gene16081	12.369	10.5423	9.2661	0.871991	0.473067	1.21107	down
gene5672	22.744	23.2206	22.9429	92.8008	105.571	103.626	up
gene41436	28.0185	29.4356	32.1664	0	0	0	down
gene8140	4.81054	5.21357	4.85273	0.0416337	0.0154646	0	down
gene13711	18.3394	15.6167	13.5177	1.11968	0.328678	1.90738	down
gene6494	10.2413	9.48349	8.8675	0.613793	0.342531	0.408997	down
gene35346	21.389	19.8612	21.4421	3.92249	4.83316	6.12748	down
gene28414	0.791948	0.313985	1.02594	0.0750631	0.0524801	0	down
gene21399	0	0	0	2.87061	3.91337	1.44718	up
gene26971	0.151804	0.183624	0.295279	1.10827	1.85561	1.29783	up
gene24259	0.0934277	0.0476524	0.0895677	0.485309	0.491995	0.44597	up
gene22228	10.9589	10.8397	10.9213	1.8162	2.36424	0.534662	down
gene27052	29.5706	28.4667	29.3157	6.00732	8.1783	5.48972	down
gene27925	1.83681	2.03848	2.11539	0.432429	0.424161	0.342248	down
gene14906	0.17272	0.0690869	0.113952	2.66079	0.981195	1.20543	up
gene23013	3.47618	3.01854	3.96224	0.569344	0.307748	0.645601	down
gene26302	12.7246	14.5425	11.5922	0.110769	0.134452	0.101424	down
gene26484	2.52903	2.45833	2.48372	0.372584	0.114688	0.303422	down
gene13615	49.0856	34.8802	112.45	319.721	298.986	269.33	up
gene8736	6.8997	6.56558	5.58804	0.908936	0.715378	0.784001	down
Walnut_newGene_6408	1.36968	1.73472	2.40692	7.7879	8.58582	7.98533	up
gene32694	32.6202	29.7941	31.4593	0	0	0	down
gene5114	84.6708	82.7062	83.4175	4.68656	5.39122	4.85457	down
gene41989	32.8769	28.6269	26.7079	0.249322	0.325293	0	down
gene13893	2.97533	5.19403	3.36555	48.962	33.0267	16.4838	up
gene1378	2.28005	2.34913	1.90679	9.81605	7.8633	12.7243	up
gene15769	2.67633	2.79728	2.69433	11.7714	11.6408	11.5168	up
gene16932	0.50555	0.394422	0.631794	4.94832	3.3107	3.91893	up
gene30718	0.720717	0.466022	0.833854	0.0304973	0.0689239	0	down
gene9813	146.997	143.458	118.599	25.0011	42.3317	26.1878	down
gene9648	8.60411	9.37364	9.22107	0	0	0	down
gene1907	1.23271	1.23573	1.06861	15.6201	11.4244	10.9222	up
gene1188	1.60221	1.39815	1.56822	0.114331	0.0171371	0.0394637	down
gene38958	0.599577	0.310372	0.572817	2.97217	3.1087	2.56291	up
gene11465	19.9041	19.6901	19.5905	109.442	98.3945	114.251	up
gene30806	0.1608	0.21778	0.118076	5.14502	1.78599	2.2036	up
gene41505	0	0.138242	0.255711	14.4698	4.30103	9.35035	up
Walnut_newGene_186	2.0817	1.3219	1.70598	0	0	0	down
gene24098	28.7445	29.4979	28.1826	0.485327	0.726268	1.57302	down
gene1703	21.5477	22.0527	18.7556	1.76709	0.340919	0.331903	down
gene13587	105.745	114.221	105.399	19.0249	15.1507	11.8947	down
gene22493	0	0	0	5.43071	6.19094	3.34591	up
gene41556	40.9501	42.7011	42.8413	13.6899	5.99232	9.76378	down
gene9414	3.31407	3.89905	3.581	0.938306	0.685401	0.481344	down
gene34773	0.142251	0.110498	0.0347511	7.16145	5.63147	7.99194	up
gene6221	4.49227	3.93371	4.55228	38.0809	40.408	28.503	up
gene40367	0.642291	0.861221	0.313725	1.74285	2.16799	3.41346	up
gene6737	246.127	242.462	239.237	12.29	11.8848	7.37177	down
gene37296	1.68735	2.58561	1.72108	0.0424537	0.510895	0	down
gene4137	0	1.74e-30	0.185363	3.88838	3.98746	3.9157	up
Walnut_newGene_3228	7.24153	11.0438	5.59739	0	0	0	down
gene30173	0.480554	0.708252	0.187488	3.46467	1.80723	3.91692	up
gene24815	3.2031	2.6744	2.87377	0.406688	0.430729	0.825889	down
gene34813	3.34371	3.33565	3.48414	0.222486	1.18918	0.0618696	down
gene41289	17.9305	17.1527	19.2514	101.347	80.1515	120.707	up
gene38764	14.8676	10.25	14.5066	0	0.102803	0.85157	down
gene18872	0	0	0	2.16277	1.83685	2.05187	up
gene21591	36.175	39.5501	37.0039	9.40491	8.54771	8.57467	down
gene41998	741.46	734.746	718.376	27.2039	37.1891	22.4198	down
gene39260	0	0	0	0.702745	0.837395	1.85527	up
gene33122	3.1553	2.59343	2.10558	12.1806	7.95584	13.1943	up
gene449	549.504	544.082	547.491	72.7987	37.6797	51.2477	down
gene9297	0.409567	0.385019	0.489738	7.54653	7.80546	5.90043	up
gene7941	15.3649	14.081	13.5645	0.0716986	0	0	down
gene6223	55.1512	51.6725	57.5397	6.46984	13.5697	4.25201	down
gene13380	5.50205	4.54208	3.7783	0	0	0	down
gene9629	4.14236	3.83915	3.93882	0.318941	0.595411	0.659683	down
Walnut_newGene_570	0	0	0	248.54	73.6515	251.535	up
gene42091	3.5722	2.97826	2.90771	19.3906	23.3115	23.3891	up
gene23244	13.7863	12.4503	12.5133	0.443248	0.142832	0.394789	down
gene12439	23.0991	24.2109	22.6885	2.35004	3.77893	2.67898	down
gene35850	1.36517	1.10428	1.21396	3.2557	6.98446	4.26646	up
gene8255	12.2315	10.2051	10.1351	1.17164	1.1889	0.515828	down
gene21135	11.513	12.1634	12.2365	1.2343	1.3634	1.31054	down
gene14860	14.3966	12.0646	12.0019	0.102546	1.15411	0	down
gene23295	8.21202	8.95749	7.7162	0.36865	0.640166	0.800945	down
gene18607	16.5205	27.5697	21.6468	5.18748	3.44883	6.59456	down
gene32967	4.30297	4.8624	3.99255	0.158648	0.303191	0.0738674	down
gene39599	15.3673	13.9953	15.2319	0.643175	0.186359	0.458432	down
gene35771	19.1325	20.3224	17.5548	1.62271	1.24281	1.57935	down
gene33579	16.1153	16.3821	17.4943	78.0208	71.9276	74.1056	up
gene24191	0.256773	0.271866	0.445757	1.97684	1.07818	1.22186	up
gene24196	0.948438	1.63005	1.70016	6.02581	3.69028	8.78041	up
gene1866	1.72271	1.42636	0.890376	7.00971	8.65833	9.00876	up
gene16861	0.0687868	0.0349464	0	0.94386	0.681055	0.805841	up
gene31368	5.80061	5.14846	5.12511	26.0577	32.9097	17.2126	up
gene3711	0	0	0	44.8037	40.8032	48.9436	up
gene21068	2.90626	2.03861	1.82775	13.8321	10.1107	15.5428	up
Walnut_newGene_716	3.12064	0.933691	3.25329	0	0	0	down
gene40836	1.06483	1.54934	1.41374	0.253046	0.417701	0.219954	down
gene18909	2.68731	2.50723	2.61115	0	0	0	down
gene17931	2.0289	2.53272	3.40356	0	0.0558243	0	down
gene12347	234.316	242.957	220.484	45.6397	65.8359	48.4121	down
gene30159	51.3418	48.7371	52.3695	7.65521	10.5912	7.33787	down
gene10290	2.85455	2.52707	3.10453	0.346616	0.330227	0.187208	down
gene30830	7.57071	8.40717	8.81777	0.347044	0.324593	0.452545	down
gene31091	12.8284	13.7476	13.0811	0.986655	1.44561	0.527374	down
gene27563	7.24111	7.22299	8.01411	0.186993	0.23552	0.447651	down
gene4531	5.44489	4.45163	6.18158	0.374152	0.0711385	0	down
gene1001	3.65228	3.79361	3.6031	17.6466	12.8784	16.7935	up
gene42310	0.53321	0.53132	0.534158	0.112184	0.0674136	0.0637216	down
gene29873	6.46352	6.62567	7.88529	0.0590264	0.176028	0.101755	down
gene10850	283.365	292.496	282.47	19.9599	17.6988	12.6172	down
gene21781	0.902438	0.487968	0.417652	0	0	0	down
gene36829	5.93176	5.14052	4.81788	115.579	95.7114	91.8103	up
gene32495	86.2712	76.282	79.8461	0.442357	2.2439	2.23822	down
gene32322	0.0885796	0.070269	0.0338425	0.856503	0.478156	0.507184	up
gene40735	8.97907	10.0248	8.9623	0.460104	0.464263	0.414557	down
gene3971	2.99852	2.00511	2.14998	0	0	0	down
gene12340	3.18075	2.01327	2.29594	0.622596	0.804386	0.0492404	down
gene34538	0.961422	1.1779	1.25864	4.59817	5.21	4.87312	up
gene23962	1.29208	0.705418	1.31903	7.43168	6.74283	7.9802	up
Walnut_newGene_6096	119.683	117.23	118.745	7.99191	24.9109	10.4362	down
Walnut_newGene_3560	7.48508	7.7923	10.4353	0	0	0	down
gene10324	1.60533	1.30062	1.49424	18.1037	17.7772	14.2699	up
gene20945	5.70927	4.98457	5.71776	1.43883	1.02648	1.03782	down
gene10282	0.84872	1.60679	1.36707	0.0466683	0	0.122815	down
gene13262	0.222004	0.469538	0.282568	17.4352	9.62998	12.4483	up
gene8155	0	0.0735616	0.113313	24.3006	19.9456	18.7483	up
gene22925	37.4617	40.6071	39.3802	0.605379	0.168738	0.594333	down
gene7668	32.4798	30.2032	28.7159	5.97724	5.45802	5.52953	down
Walnut_newGene_6409	1.45031	1.98491	1.86783	9.30977	10.5315	10.7124	up
Walnut_newGene_1111	0.427701	0.491399	1.4e-05	25.8266	18.2077	29.0241	up
gene30066	4.09849	5.04481	3.20317	0.495071	0.0408396	0.168547	down
gene31868	35.7316	31.2004	33.8156	5.2106	6.18423	6.33049	down
gene5091	16.7156	17.6516	18.209	1.10276	1.21209	0.799374	down
gene16077	64.168	62.2156	57.7035	12.7248	10.6344	10.314	down
gene24385	1.68893	1.18912	1.77396	0	0.0471163	0.0191774	down
Walnut_newGene_5932	1.78925	1.34083	1.74124	5.44796	7.52505	6.7215	up
gene37242	10.6696	10.8535	11.0005	0.301934	0.288968	0.139379	down
gene9534	126.106	120.456	115.171	23.4638	19.7358	22.4245	down
gene22558	233.703	253.198	226.823	37.9248	62.1705	55.7694	down
gene25416	0.383309	0	0.14812	4.54459	2.03611	2.30718	up
gene30865	2.03484	1.51037	1.54868	0.0726087	0.34775	0.129055	down
gene31722	2.40825	1.71663	1.72837	7.81686	6.72237	10.8945	up
gene32185	46.9204	48.8668	47.2313	0.0157481	0	0.0414517	down
gene11183	2.49051	1.94106	1.77727	0.134256	0.199068	0.152235	down
gene1966	0.266987	0.0680916	0.0960933	1.59168	0.997004	0.714796	up
gene42094	0.759809	0.483188	0.488222	3.2235	4.97927	3.49098	up
gene39759	30.2103	34.456	31.5559	0.248989	0.110404	0.171218	down
gene38170	17.1927	20.0003	18.0788	0	0	0.20824	down
gene18586	19.0349	19.03	18.7186	86.4123	101.195	84.0757	up
gene16096	6.45232	7.16012	6.44741	1.68884	1.05901	1.5037	down
gene12087	16.8171	12.1901	13.1176	1.69414	7.19254	0.621484	down
gene3962	18.0772	16.6376	18.8451	0.510119	0.25264	0.527861	down
Walnut_newGene_1579	3.72941	4.95852	4.35216	0	0	0	down
gene11497	0	0.359519	0.390885	2.5325	3.20189	3.02179	up
gene12561	41.0425	42.9342	42.5292	4.53494	2.6986	1.99402	down
gene12468	48.4416	46.747	50.5464	7.92233	4.47099	4.85805	down
gene16927	0.0538729	0.168713	0.0819332	0.603979	0.710753	0.586503	up
gene40617	1.07525	1.10462	0.701336	0.0227317	0	0.0195949	down
gene15005	1.92642	1.45492	2.87978	0	0	0	down
gene19186	0	0	0	4.24894	3.58118	5.43803	up
gene38341	104.113	99.7444	89.8672	5.07778	4.52643	4.13479	down
Walnut_newGene_1349	0.292579	0.10097	0	1.62951	4.0353	5.91219	up
gene25034	0	0	0.0437073	6.86461	3.84406	7.35732	up
gene38709	55.9198	55.3331	45.512	0.762277	1.35114	1.05821	down
gene15740	0.106623	0.0818791	0.272629	12.2339	12.1248	12.6022	up
gene20053	0.060768	0	0	3.9606	5.56809	5.95768	up
gene25293	67.7386	66.2003	65.1793	2.43177	5.08615	2.10933	down
gene6229	0.249774	0.131129	0	4.09287	2.7224	1.63394	up
gene32312	35.6791	35.9766	39.6248	2.55226	4.09459	2.99516	down
gene34337	0	0.099365	0.0918117	1.18263	0.63495	0.580313	up
gene35154	51.3499	56.3716	55.1128	0.145126	0.635709	0.119818	down
gene17443	8.09848	7.57518	7.27121	0.16387	0.197003	0.207049	down
gene38563	23.6376	18.3506	16.557	2.14451	2.52958	2.16532	down
gene9497	30.4238	35.7558	31.6792	7.84341	7.11208	6.16695	down
Walnut_newGene_7411	1.67924	0.8585	2.69689	42.4994	44.1796	45.3191	up
Walnut_newGene_3845	11.1607	10.6724	10.5762	114.308	59.1443	98.3959	up
gene42784	22.2582	23.338	21.9697	2.10647	5.68037	1.80421	down
gene28855	0.244781	0.115815	0.161447	3.99018	3.6261	3.47159	up
gene20868	21.3206	25.7372	24.1566	0	0.161502	0	down
gene39827	959.641	990.206	872.484	207.37	222.467	214.755	down
gene24270	1.73884	2.46154	2.35208	0.0929166	0	0	down
gene43128	1.40907	2.52084	2.3022	8.07581	10.5648	10.0782	up
gene2302	1.87349	1.77294	1.50108	0.491185	0.260467	0.522019	down
gene15223	34.7841	32.2509	34.9138	7.62949	5.74696	9.17401	down
gene5822	0.563935	0.119569	0.326496	2.4767	2.51557	2.68935	up
Walnut_newGene_7417	15.6485	11.7462	10.3456	0	0	0	down
gene41312	1.64749	2.23196	2.55048	0.0666705	0	0	down
gene17470	20.1294	17.1324	14.2861	0.510542	0	0	down
gene25955	3.02481	3.49053	2.64956	25.6671	15.2006	24.3971	up
Walnut_newGene_7205	14.2604	11.7916	13.3739	1.93e-07	2.97e-06	9.07e-05	down
gene37697	69.9183	78.7092	66.4524	0.228392	1.49378	0.411755	down
gene33812	4.42386	4.38714	4.32123	0.0624276	0.108511	0.0727016	down
gene35828	4.08704	3.90029	3.65053	0.333451	0.342774	0.179622	down
gene29174	1.7901	1.5744	1.68377	0.06785	0.0506917	0.215324	down
gene20592	8.07244	10.0164	7.54199	0.345657	0.429813	0	down
gene13238	0	0	0	2.80214	2.6639	2.05148	up
gene27038	0	0	0	3.80282	4.2542	5.27002	up
gene32362	51.4403	59.4972	53.5519	3.83436	11.5664	2.22184	down
gene26597	0.171641	0.0885882	0.336504	2.88028	2.36803	2.72951	up
Walnut_newGene_120	1.73794	1.64365	1.39054	0.157377	0.709518	0.237619	down
gene2892	17.8714	17.7275	16.8754	0.363016	1.59227	0.266386	down
gene10866	26.3621	26.1039	26.2099	0.567128	0.762803	0.128549	down
gene9574	1.35014	1.17454	1.81416	11.5123	6.43366	5.62712	up
gene27792	4.35185	4.50802	5.52772	0.131719	0.0976476	0.678691	down
gene28799	0.477835	1.18913	1.22866	0	0	0	down
gene7049	4.33004	6.12494	4.69639	0	0	0	down
gene42785	1.82462	2.2818	2.86237	0	0.0455886	0	down
gene2272	29.3266	30.5922	30.7738	3.97063	5.05094	4.31717	down
gene21884	8.66905	7.63712	10.8324	1.1018	1.96504	1.24253	down
gene33090	0.0413414	0.0421099	0.0802875	1.41661	1.10764	0.53536	up
Walnut_newGene_6955	0	0	0	6.64763	7.77738	11.3894	up
gene6175	69.0053	64.9315	66.2023	8.2219	16.7906	11.1702	down
gene31774	19.4956	23.1927	21.3076	1.97189	1.03226	1.59821	down
gene16947	77.4409	79.0315	78.3471	9.54369	13.0697	8.7414	down
gene22462	10.0204	9.34326	3.82547	0	0.209068	0	down
gene13799	4.45341	5.22776	4.25808	17.9097	19.9764	15.6957	up
gene39652	6.48982	7.51769	8.63392	0.0345288	0	0	down
gene1938	23.3155	23.6668	23.0082	0.0379092	0.0141197	0.0164558	down
gene26747	0.0582943	0.029453	0.0564735	0.830815	0.323511	0.76612	up
gene27117	3.76602	4.37189	4.05695	0.487938	0.265036	0.1902	down
gene10776	2.92134	2.37859	3.17253	0.0245115	0.111008	0.0659501	down
gene17363	4.99117	5.214	3.58276	128.018	146.065	136.324	up
gene41818	12.7283	14.316	20.6258	0.697122	0.74677	0.314686	down
gene26462	1.52063	1.88628	1.28665	11.4754	8.0895	7.14574	up
gene32411	0.517569	0.533225	0.635329	14.1633	7.84131	6.49671	up
Walnut_newGene_697	0.863281	1.16248	1.29779	0.428479	0.0488971	0.400052	down
gene25313	0.677554	0.697755	0.337366	8.49198	3.72832	3.62714	up
gene21716	2.00219	2.55889	2.45723	0.16268	0.440661	0.106071	down
Walnut_newGene_3964	3.57816	3.25431	3.84432	0	0	0.136776	down
gene1102	16.2057	17.4924	15.3371	3.1725	3.35319	3.19097	down
gene32912	2.19e-05	5.02e-05	0.361555	2.4804	1.68797	1.19372	up
gene4341	4.21405	4.8276	4.195	0.357257	0.831951	0.488556	down
gene4310	10.8788	11.7517	10.9803	1.73539	5.25831	0.951857	down
gene23974	10.5638	10.2865	10.9843	2.94735	2.37714	1.83348	down
gene11916	78.0566	80.6218	76.6534	11.273	35.5108	9.04171	down
gene1999	0.255681	0.0970203	0.309842	1.10873	1.17181	0.914685	up
gene16219	0.648088	1.46798	0.799855	61.1883	17.9299	28.338	up
gene39163	3.71091	3.2633	3.45098	0.375103	0.591268	0.594045	down
gene6362	4.41791	4.08073	4.81263	1.37076	0.427924	1.08784	down
gene9079	9.39748	10.365	8.38046	60.4141	25.7001	44.0471	up
gene20839	11.3568	12.2417	10.7584	0.845138	0.65773	0.943234	down
gene40894	4.53012	3.51644	4.56517	0.151696	0.18789	0.859527	down
gene17073	1.68897	2.56965	3.04975	0	0	0	down
gene40138	1.29153	1.22727	0.967999	0.444583	0.165343	0.148282	down
gene16229	27.8803	31.1533	21.3083	234.052	132.334	156.464	up
gene9565	24.7794	26.3513	21.5769	0.387664	0.974058	0.788455	down
gene21589	3.71853	4.28427	4.06922	0.238015	0.533815	0.410816	down
gene37850	0	0	0.0313831	0.673529	1.06871	0.940297	up
gene23837	3.43674	4.62342	4.5496	25.0778	20.3263	19.6256	up
gene9512	0.0259733	0.0262364	0.0253904	0.914724	1.01952	0.908935	up
gene30232	27.4121	29.8564	25.669	7.50852	6.32847	6.52368	down
gene1606	135.184	141.091	127.246	3.1062	4.14993	4.26633	down
gene1325	39.843	39.6247	41.1642	5.73551	6.58714	3.79269	down
gene9154	3.25206	4.95208	4.80542	0.408922	1.23119	0.530722	down
gene21115	3.49154	3.26554	3.87709	0.158658	0.435224	0	down
gene3762	7.05617	7.68422	7.75749	0.409254	0.55625	0.212313	down
gene27663	6.55474	4.05942	4.92073	0.449067	0.733835	0.295512	down
gene27889	99.9108	96.7595	93.3706	5.13158	5.28919	3.70858	down
gene14842	37.2091	39.4467	36.5403	292.511	269.81	384.505	up
gene360	0.0460062	0.0953597	0.214207	1.28143	0.965307	2.28152	up
gene38737	0.61622	0.97961	1.13519	0.327904	0.131706	0.153066	down
gene31026	6.17464	6.51435	4.19593	0.268051	0.200145	0.176145	down
gene11662	164.443	155.375	156.446	16.0682	21.3833	8.10572	down
gene10736	3.35408	3.04293	3.07501	13.3486	22.683	14.1045	up
gene2996	0.0681095	0	0.205863	31.043	36.0303	33.7235	up
gene38721	561.62	571.456	536.372	38.1036	18.702	29.6227	down
Walnut_newGene_279	14.6367	15.7178	17.0936	0	0	0	down
gene26291	27.7564	27.6197	26.5425	5.41112	7.58842	4.33551	down
gene2389	2.19226	2.36295	2.56921	0.162312	0	0.06476	down
gene22299	0	0.0569856	0	2.78983	4.27807	3.64246	up
gene14753	15.6537	14.6709	16.2261	84.9795	72.6012	72.6772	up
gene7014	15.3791	11.2344	8.82058	0.408597	0	0.242273	down
gene12383	13.6196	13.234	14.2184	0.220757	0.562779	0.0961512	down
gene25166	1.40529	1.49899	0.742614	0	0.0652237	0	down
gene855	0.0564131	0.113593	0.0542776	3.36528	4.43258	3.57242	up
gene17686	6.87838	7.7425	6.76781	0.624566	1.95731	0.493133	down
Walnut_newGene_4463	0.0132624	0.0132551	0.0385398	0.970137	0.626203	0.606935	up
gene16793	0.421451	0.515792	0.34319	0	0	0	down
gene34420	0	0	0	3.10123	4.15576	3.59952	up
gene42082	2.51066	1.56407	2.65616	0.356486	0.855957	0.18942	down
gene34596	0.19364	0.125966	0.120052	3.76394	4.94662	3.61106	up
gene4286	2.72971	3.13708	2.36038	0.959742	0.403584	0.296623	down
gene15704	56.4499	59.1918	53.4669	3.31128	12.4074	3.94723	down
gene25477	47.6349	54.1986	52.4837	1.33262	1.62532	0.868235	down
gene33321	45.6363	49.8322	46.1795	5.8178	10.9206	3.97106	down
gene6544	0.155881	0	0	9.24122	3.8757	8.37821	up
gene32986	9.16695	10.7772	8.03921	79.2853	79.524	65.2823	up
gene12046	45.4396	49.7338	44.4829	0	0.222184	0.042695	down
gene24093	2.43176	2.17372	2.76552	37.1244	46.6325	42.9305	up
Walnut_newGene_93	0.180535	0.184722	0.294998	1.051	1.17379	1.01664	up
gene30285	0.226776	0.102089	0.171331	17.4526	14.96	13.4743	up
gene11602	6.25615	5.97251	6.63218	1.14949	0.515706	0.455724	down
gene1386	3.28742	2.64552	2.50142	0	0.167543	0	down
Walnut_newGene_1077	4.46311	5.21845	5.13091	0	0	0	down
gene14852	1.18316	1.06157	1.78059	0	0	0	down
gene22402	48.6913	49.3569	46.3168	0	0	0.0429951	down
gene25324	19.5781	18.1086	17.6234	0.925856	0.568446	0.603669	down
gene13093	93.5446	89.2125	85.3066	5.21507	1.73114	1.80107	down
gene15117	71.8794	72.4458	69.2466	257.227	292.052	299.437	up
gene14611	2.46796	2.09621	2.79334	0.167203	0.691369	0.250274	down
gene32389	20.3009	21.3985	20.5732	3.23315	1.92055	3.45632	down
gene37288	2.04331	2.54433	2.48797	0.124311	0.17008	0.0534522	down
gene35052	1394.58	1370.88	1352.64	291.824	402.892	374.288	down
gene31972	0.321881	0.571879	1.08312	3.75986	2.57783	3.31521	up
gene35620	4.85474	4.49535	3.83101	0.429919	0.0965963	0.337644	down
gene40162	11.0977	10.009	10.8811	0	0.169331	0.297487	down
gene1156	143.284	150.916	144.927	12.0179	13.511	11.9589	down
gene8581	22.8475	25.0361	28.2857	2.50611	3.39183	3.5455	down
gene20001	0.278592	0	0.265997	5.11079	5.21421	6.92154	up
gene30276	6.81092	10.1221	6.13991	0.234125	0.174482	0.0666845	down
gene16029	3.41805	3.2116	3.19403	0.18411	0.0880567	0.0728747	down
gene41448	7.57672	7.07467	6.34735	48.5459	41.1047	43.3141	up
gene35997	44.4682	46.5653	47.2039	3.30443	9.1969	1.9807	down
gene35051	62.2273	60.0443	60.9055	284.669	243.443	277.077	up
gene34012	6.82186	5.69818	7.19722	0.0103669	0.00936427	0.0448001	down
gene24115	0	0	0	1.42389	1.37593	2.17846	up
gene26127	2.083	2.83171	1.64475	0.272536	0.471324	0	down
gene29214	0.136908	0.123362	0.101941	0.954339	0.580366	0.514828	up
gene36375	7.24106	9.48128	7.73792	126.246	155.46	148.761	up
gene1085	4.10409	5.14596	4.9716	0.977974	1.42028	0.77489	down
gene41793	14.802	13.7461	16.4649	0.921732	3.39695	1.25329	down
Walnut_newGene_1994	1.74953	1.64891	1.5293	0.0362232	0	0	down
gene7611	51.6918	52.711	47.4688	1.11151	0.630961	1.15828	down
gene10512	18.1257	16.527	17.5016	2.88265	2.68368	3.2273	down
gene22360	17.3387	17.9125	17.0078	0	0.0142675	0	down
gene25387	21.4918	25.3976	20.2068	2.56853	0.591177	1.21818	down
gene10550	0.707455	0.87669	1.29441	0.225705	0.168429	0.166145	down
Walnut_newGene_5155	2.2074	4.2565	1.09325	6.51734	9.58947	10.693	up
gene35499	72.4406	68.9562	67.4449	0.392872	0.21213	0.203693	down
gene74	216.455	213.405	212.998	0	0	0	down
gene18845	1.31205	1.10518	1.25694	5.91396	4.80764	4.52657	up
gene21545	314.09	318.738	311.031	1585.15	1067.82	1202.21	up
gene13722	10.3031	10.6315	9.8237	0.272213	1.42261	0.638563	down
gene35283	75.1735	75.7739	76.2324	17.4971	18.7713	17.4849	down
gene38149	4.08964	5.30354	4.31605	1.49176	0.525376	1.13281	down
gene1331	13.1174	15.2712	13.6389	2.54865	1.01812	2.6884	down
Walnut_newGene_1320	33.655	68.5603	39.5136	0	0	0	down
gene20985	24.8242	21.9504	18.1255	3.69258	7.03884	3.23144	down
gene41336	14.726	12.4663	10.8221	0.0843926	0.254289	0	down
gene35897	5.62426	8.09945	7.61238	0.148487	0.111591	0.0635877	down
gene30784	0.0900795	0.251248	0.118121	2.07806	0.890437	1.10615	up
gene39718	5.78621	8.27781	5.04831	0.21228	0.0534164	0.189515	down
gene41304	6.51955	5.65982	4.24033	0.0869032	0.0639146	0.471471	down
gene23508	0.058768	0.103198	0.142143	1.74253	1.60013	1.08857	up
gene21619	1.47802	2.49217	1.86031	0	0.0510834	0	down
gene6863	2.56558	2.46197	2.17115	12.6205	9.4577	12.1048	up
gene16535	0.779898	1.0685	1.64278	8.72983	8.39451	7.59149	up
gene23533	0.443973	0.41004	0.565933	0	0	0	down
gene35365	0.822407	0.627341	0.755068	0.108015	0.0268114	0.0934848	down
gene11533	108.028	110.904	101.298	1.7814	2.637	2.42872	down
gene42199	0.896642	1.17881	0.794425	0.181155	0.178936	0.110757	down
gene32774	4.6233	6.8561	5.46568	0	0.0181128	0	down
gene29063	23.5532	24.4378	21.9351	3.60929	1.45407	2.76169	down
gene31121	84.4955	89.4694	79.5972	7.64196	10.2579	6.59438	down
gene22150	64.7471	76.2181	68.5433	13.7077	14.246	12.2821	down
gene38376	4.72341	4.43695	3.39583	0.107947	0.121535	0.233126	down
gene16814	0.0682977	0.253136	0.100994	0.462179	0.931714	0.75409	up
gene31654	15.9855	15.8906	14.6584	3.03421	3.48246	3.38407	down
gene22219	18.1881	19.1431	15.576	2.93562	3.85805	2.49358	down
gene41469	23.6091	23.1871	20.4233	4.45133	4.52045	4.44289	down
gene34504	1.05645	0.622327	1.37562	5.71921	4.20846	3.96322	up
gene30119	0	0	0	14.2269	16.1095	19.2933	up
gene16101	14.3246	12.0655	12.1718	0	0.0287287	0.033638	down
gene26476	9.50969	11.369	9.00228	1.08461	0.182262	0.249532	down
gene17529	8.73365	6.43496	5.59754	0	0	0	down
gene29734	16.8175	17.5166	16.631	1.72371	2.11283	1.06074	down
gene29036	1.46505	1.51864	1.92462	13.9899	13.1544	16.5298	up
gene22644	17.41	16.6491	19.17	3.28133	2.55706	1.71437	down
gene29276	84.2186	79.6365	82.6843	14.6987	17.9442	16.7381	down
gene15508	22.0479	23.6189	21.9506	0.509963	0.415017	0.39094	down
gene22263	357.382	352.423	357.26	12.7346	26.6273	15.2838	down
gene34618	0.653909	0.8376	0.305756	0.0201656	0.0300112	0.0516395	down
gene31754	19.7342	22.1707	16.7538	3.09171	2.76848	1.47613	down
gene17417	105.248	109.37	111.447	0	0	0	down
gene16161	16.5145	16.5557	18.4752	0	0	0	down
gene21871	1.62852	1.62449	1.94441	12.1907	14.0914	13.7406	up
gene5845	0	0	0	16.9443	3.276	7.51205	up
gene22230	19.1768	21.7451	22.2394	217.623	86.3759	164.712	up
gene9230	260.45	271.919	262.497	17.5772	39.9782	35.9397	down
Walnut_newGene_6880	0.0349827	0.141405	0.161725	1.24815	0.599987	0.608417	up
gene2650	9.00646	10.9674	8.47216	0.641085	0.156451	0.495652	down
gene11967	45.2404	38.2553	41.8153	6.11511	2.40216	5.61626	down
gene25561	17.8437	14.8395	16.7207	1.99356	0.434579	0.580891	down
gene32545	2.56436	2.71636	2.87509	0	0.0416863	0	down
gene11259	9.58317	10.3375	10.6134	0.688762	0.0646404	0.11242	down
gene18027	0.691054	0.639116	0.227998	0.0223772	0.0166985	0	down
gene41658	166.683	177.194	160.399	6.14843	8.30584	7.56369	down
gene22183	19.2328	21.2367	18.0204	0.593464	0.656665	1.29334	down
gene31817	9.06486	11.19	9.88134	6.76139	7.16419	10.3568	down
gene21461	2.24369	2.78981	2.4255	0	0.0786822	0	down
gene11350	18.5846	21.4364	20.655	0	0.0290422	0.0669592	down
gene11463	5.11014	4.96191	4.94406	0.398266	0.224026	0.145524	down
gene3131	5.14255	3.72263	4.25514	0.49728	0.768598	0.446067	down
gene26807	1.35014	1.19739	1.20834	0.174894	0.691874	0.0989924	down
gene6875	3.49116	2.58532	2.86247	0.0485693	0.335171	0.0997915	down
gene33674	290.411	296.564	281.813	45.5197	38.3379	38.3307	down
gene28076	0.150106	0.34442	0.513706	2.92414	3.33033	4.94089	up
gene30014	0.717208	0.646482	1.00428	5.82555	3.56501	3.99931	up
gene11807	1.63525	1.628	1.63972	0.390472	0.314865	0.411262	down
gene26831	0.395478	0.204574	0.535981	4.78276	3.32223	7.78509	up
gene31381	2.63419	2.91648	2.57945	0.414526	0.484353	0.169069	down
gene37001	3.7875	3.27531	2.62127	0.215289	0.0304996	0.0975505	down
gene21252	67.3996	72.1197	71.4659	17.5764	16.4119	13.7319	down
gene24657	15.2392	16.3219	11.8493	0.136047	0.301595	0.148284	down
gene33637	126.622	122.651	128.247	29.2677	32.9099	30.5426	down
gene25402	197.972	192.556	187.486	2.67173	2.16815	2.52329	down
gene7455	246.649	256.795	252.921	1.66388	3.75	1.22457	down
gene41735	457.759	444.435	482.217	101.814	38.0744	37.4804	down
gene13503	1.24813	1.00874	1.65484	0.0241671	0.0179497	0	down
gene12117	9.36904	10.979	9.38289	2.15696	0.872879	2.18701	down
gene37161	65.3925	66.4953	60.1011	14.3361	16.2235	14.4266	down
gene17946	0	0.100266	0	109.442	136.432	115.638	up
gene16626	8.30761	13.6791	11.5229	0.512795	0.553344	0.531893	down
gene9752	39.079	37.1799	39.9221	6.21002	8.2637	5.38802	down
gene28290	0.741218	0.823266	0.8246	0.093668	0.0695688	0	down
gene7209	4.34807	3.61533	5.24627	0.265038	0.517387	0.639481	down
gene40645	62.044	58.5024	64.0558	11.8423	16.7043	12.2811	down
gene8226	247.84	249.142	240.883	29.5767	55.0644	30.7946	down
gene11837	8.37314	9.40071	10.1124	1.24483	0.834972	1.16172	down
gene36242	329.161	343.548	332.289	24.9633	36.8924	24.0537	down
Walnut_newGene_581	1121.48	1162.59	1068.42	13.0377	5.01294	14.1075	down
gene16816	1.02587	0.477143	0.754146	5.87792	5.60661	6.60053	up
gene16894	135.107	136.801	134.876	1.37079	2.04991	1.31126	down
gene40827	4.72704	5.46514	4.7683	0.588199	1.58218	0.282978	down
gene97	0.743615	1.05877	0	4.65289	3.1543	5.05813	up
Walnut_newGene_7088	0.0798147	2.16e-24	0.0465526	2.36088	2.0471	2.79181	up
gene20290	2.75005	2.67453	2.6133	0.390527	0.0723479	0.791274	down
gene26246	88.6813	88.4551	89.1686	0.885587	0.839439	1.44043	down
gene24789	21.4879	23.3775	22.1487	4.72494	4.62285	4.04956	down
gene8987	13.9976	14.6268	11.447	0.0982638	0.0243166	0.0567247	down
gene28444	165.645	169.966	157.204	52.4425	41.2669	33.9775	down
gene35584	7.45426	6.73202	6.46931	0.480567	3.43639	0.277359	down
gene41081	89.4028	89.31	103.567	5.89896	10.3212	5.37561	down
gene40659	10.2264	10.7768	11.2334	0.386018	0.296648	0.439939	down
gene30117	0	0	0	21.8481	13.0629	24.2456	up
gene3215	39.5261	42.6009	38.2427	2.03365	1.8655	0.955257	down
gene42763	6.9844	7.21199	6.68066	0	0.259799	0	down
gene25066	298.498	292.021	289.121	55.8157	71.4162	64.3587	down
gene14370	3.6016	3.78355	3.70446	0	0	0	down
gene14506	2.44763	2.79803	3.62786	0.607547	0.492589	0.465566	down
gene4655	2.42988	2.05656	2.29547	0.36438	0.648455	0.517266	down
gene24117	1.15899	1.23001	1.06128	0.0386246	0.109848	0.0639689	down
gene9822	4.3495	8.30371	7.71261	0.531544	1.39e-06	6.17e-24	down
gene41461	6.28739	4.81065	4.54451	0	0	0.151309	down
gene8469	54.6094	53.821	55.4734	4.5376	4.02207	3.80323	down
gene23247	316.154	326.976	294.198	38.7243	31.2142	28.9996	down
gene14982	30.604	28.7369	28.5626	3.42809	3.48087	2.18383	down
gene38722	2.88515	2.36678	3.1414	0	0	0	down
gene11181	1.31236	1.43377	0.927281	0.160124	0.455765	0	down
Walnut_newGene_6114	29.047	30.5599	26.2523	0.312897	0.335234	0.238735	down
gene31188	15.8172	14.6976	14.5981	1.61306	1.28507	0.936134	down
gene33616	62.6136	61.6886	61.697	0.441875	0.497705	0.15338	down
gene8436	0	0	0	0.592768	0.258854	0.345899	up
gene10134	11.6088	13.6569	11.055	0.73271	0.055916	0.0745927	down
gene38802	0.293907	0.411102	0.365302	4.68611	4.32799	5.31688	up
gene41657	56.0753	60.136	57.4195	0.0784749	0	0	down
gene14660	2.201	2.08099	2.11444	0.177855	0.176995	0.11918	down
gene7585	61.1581	53.6661	59.9979	0	0	0	down
gene31672	1.69216	1.50953	1.89231	0.20787	0.12713	0.124713	down
gene9954	18.4589	18.9472	15.6117	1.64554	2.8416	1.1683	down
gene30270	0	0	0	4.41843	4.32566	3.52246	up
Walnut_newGene_3978	15.0179	15.8338	11.3241	0	0.0350751	0	down
gene40456	11.2629	12.7238	13.3284	0.577004	0.631785	0.45017	down
gene26941	3.59937	5.35357	4.59887	0	0.0724741	0.0491517	down
gene26197	27.398	29.5093	30.3943	0	0	0	down
gene2826	0.944431	0.373693	1.90066	9.39264	3.64966	9.25717	up
gene21510	6.08468	2.97483	4.01184	1.19646	0.799327	0.293564	down
gene38927	0.887508	0.897043	0.819092	8.87453	6.99905	5.83948	up
gene9037	17.4805	16.8367	18.0192	6.15142	3.111	1.12833	down
gene20844	5.70058	6.45968	5.34894	0.425304	2.81152	0.799593	down
gene7863	14.444	11.4155	13.8572	0.70725	5.95006	1.58545	down
Walnut_newGene_346	3.5275	3.38739	4.2117	0	0	0	down
gene38309	6.36583	3.07314	5.37692	0.506005	0.127124	1.37215	down
gene3211	19.0901	19.435	15.882	2.91493	4.22739	2.26985	down
Walnut_newGene_1070	0.86992	0.69823	0.782789	0	0	0	down
gene7107	1.18642	0.926504	0.915481	0.173647	0.216082	0.0246658	down
gene28532	16.5753	20.358	16.6314	2.26558	1.34042	0.684333	down
gene14994	5.19279	4.59174	4.28529	0.517441	0.656996	0.228449	down
gene16245	8.85329	8.84162	7.74868	0.90046	0.924386	1.18782	down
gene12065	6.97764	6.01348	5.09812	0.869436	1.24453	0.723201	down
gene21032	0	0	0.0544627	0.882829	0.446037	0.910884	up
gene4873	136.347	142.004	137.123	20.246	30.7001	18.6153	down
gene33364	0.0848806	0.0867028	0.104747	0.763357	0.523303	0.363142	up
gene31216	1.94381	2.59618	1.97872	0.0827001	0.832264	0.0506344	down
gene9650	16.8339	16.7341	16.9935	0.187508	0.0839841	0	down
gene13684	13.0448	11.7644	16.5361	0.512005	3.91563	0.602097	down
gene15079	4.79358	9.31946	6.15087	0.203063	0.596647	0.54375	down
gene25217	24.5543	22.9403	21.7832	2.28015	2.46385	2.86811	down
gene28622	9.22031	8.40309	7.99881	1.70442	0.981898	1.01066	down
gene9895	150.5	154.349	145.883	12.8397	15.2038	10.9903	down
gene34741	0.0510417	0.063882	0.0495578	0.636259	0.499556	0.391865	up
gene32987	9.11539	8.73625	7.43919	0.130129	0.122062	0.114116	down
gene7453	0.323848	0.329328	0.46135	2.43024	2.64551	1.70961	up
gene40133	1.95654	2.34031	2.36366	0.130494	0.0496789	0.114541	down
Walnut_newGene_6829	0	0	0.0845829	6.42882	7.80768	6.33008	up
gene31191	2086.81	2167.2	2013.53	362.736	415.618	337.355	down
gene38227	2.92228	3.25019	2.20545	0.429868	0.54427	0.183082	down
gene13638	1180.6	1182.26	1131.72	220.508	324.628	191.302	down
gene4104	0.714619	8.57e-33	0.243527	1.37438	1.44382	2.02144	up
gene16801	1.0187	0.863001	0.987759	6.32752	3.4613	4.46731	up
gene28966	7.19998	7.26581	7.21101	0.741563	1.38028	0.290521	down
gene34698	0	0.134749	0.263236	6.90096	5.06225	6.5642	up
gene12264	0.703817	1.22494	0.584684	0.0276948	0.0828368	0.142467	down
gene34445	0.0390495	0	0	0.496093	0.463667	0.434392	up
gene1328	67.5986	67.7416	72.332	12.2596	12.4003	14.7398	down
gene37388	12.296	11.5444	11.8927	0	0.0233296	0	down
gene10085	4.17387	5.80792	4.20846	0.912792	0.240795	0.437397	down
gene3548	3.67754	3.63967	3.33113	0.228727	0.908855	0.0662019	down
gene12791	5.96382	4.99938	5.15209	0.405033	0.368576	0.310908	down
gene28509	29.9321	31.1715	31.119	149.244	135.107	90.6086	up
gene36072	9.41111	10.4262	8.97777	63.8515	64.6206	67.2562	up
gene38239	0.884088	0.53985	0.725985	0	0.0450709	0	down
gene12845	2.53171	2.60885	2.57608	0.498697	0.537272	0.49032	down
gene2381	1.60859	1.1844	1.99598	0	0	0	down
gene30940	14.4973	14.9242	13.553	2.4283	1.87275	2.13554	down
gene40317	5.15204	7.0899	6.58879	0.0686618	1.78483	1.07251	down
gene5414	2.1884	1.67012	2.12807	9.52502	9.97714	10.1187	up
gene37711	3.22226	2.32029	2.43088	0	0	0	down
gene4354	30.2906	28.824	30.378	119.992	135.799	123.245	up
gene23285	2.07294	1.28063	1.32686	0.131558	0.193487	0.243715	down
Walnut_newGene_6056	0	0	0	1.78759	2.4236	2.17807	up
gene23242	15.3896	16.5426	14.5127	0.371992	0.332964	0.0649444	down
gene23867	0.79703	0.418476	0.709589	10.3714	9.0513	10.8282	up
gene22482	1.34926	1.28156	0.814817	0	0	0	down
gene8773	1.03536	1.08731	1.29671	0.389726	0.186271	0.113356	down
gene16240	212.373	220.129	214.669	11.2955	19.7962	9.1477	down
gene9337	1.16583	1.17153	0.730124	14.7016	11.0164	12.7583	up
gene24318	20.3462	18.9804	19.6101	0	0.0926321	0	down
gene27665	1.95484	1.9106	1.90375	0	0	0	down
gene4460	22.814	22.3673	21.5829	4.05547	3.54987	4.42482	down
gene33448	93.3948	105.15	83.1423	7.65733	9.04523	8.42619	down
gene28091	6.56661	5.25664	7.20004	0	0	0	down
gene7279	0.662689	1.41545	1.09649	0	0.0834419	0.190828	down
gene37845	2.71338	2.69993	2.94237	0.209714	0.13128	0.0910271	down
gene27088	3.9363	3.09229	2.42844	0.116416	0.225238	0.0397343	down
gene21847	50.1546	44.9236	41.1771	0	0	0	down
gene10275	13.5535	15.4398	17.4416	0	0	0	down
gene37965	13.5156	13.5781	11.4935	0.62355	0.788415	1.01568	down
gene13523	3.25747	3.38826	2.83603	0.551541	0.935582	0.844655	down
gene27207	17.642	16.0883	16.9825	0	0	0	down
gene15167	8.45926	7.23516	6.40596	0.940341	0.534431	0.547121	down
gene9920	89.5931	93.8513	94.5978	9.5227	18.9679	8.55976	down
gene10588	6.33783	6.75028	4.7869	0	0	0.083282	down
gene27128	5.76451	6.95986	6.50866	0.0965397	0	0	down
gene9358	79.4704	81.0522	76.9011	10.3269	9.81779	8.4525	down
gene26840	0.513871	0.526409	0.474492	0.159501	0.0510222	0.0195084	down
gene28459	37.1078	37.7301	34.3115	231.396	166.832	252.867	up
gene9863	67.4085	69.706	65.5089	1.48411	1.13601	0.74512	down
gene5484	14.1302	14.723	14.1983	0	0.040457	0.0463536	down
gene36585	0.0543073	0	0	9.10842	1.48378	3.88744	up
Walnut_newGene_2008	0	0	0	7.95207	12.1207	4.60067	up
gene35496	15.9358	15.8437	13.9804	0	0	0.111717	down
gene4114	4.10002	4.97712	3.75611	0	0	0.0825615	down
gene32576	31.6697	31.3292	34.2368	152.559	81.2506	163.625	up
gene39777	11.2872	11.9154	10.633	59.7004	41.3956	56.3046	up
gene37811	6.89569	6.95922	6.33572	0.934587	3.51904	0.442708	down
gene31432	6.14037	5.78933	6.90899	1.35441	0.488955	1.32783	down
gene16693	115.959	114.693	103.063	2.54961	6.19723	2.70191	down
gene39922	0.633868	0.708755	1.14204	0.0267474	0.179246	0.18306	down
gene23228	1.39997	1.13805	1.02406	0	0.0217711	0.0522442	down
Walnut_newGene_7488	0	0	0.347158	5.1957	7.48338	6.46281	up
gene24179	1.36184	1.11075	1.12591	0.132527	0.246296	0.171879	down
gene737	2.68572	2.21413	2.51027	0	0	0	down
gene19017	0.211115	0	0.783768	3.66932	2.98614	4.74255	up
gene9377	6.08652	6.0903	5.74853	1.09051	1.64022	0.499032	down
gene21402	0.104747	0	0	48.8846	51.8561	66.2267	up
Walnut_newGene_525	0.237852	0.272893	0.522209	0.00035074	9.06e-05	1.11e-05	down
gene25966	10.1673	8.7521	8.54804	2.65941	2.90272	1.07469	down
gene4314	1.30251	1.14079	2.27784	0.032964	0.123209	0.194403	down
gene11396	32.6781	33.9912	33.2068	3.2425	8.05822	1.31194	down
gene21411	6.69038	5.77166	5.15816	0.059404	0.175944	0	down
Walnut_newGene_3226	223.359	239.741	208.804	14.3445	13.3397	9.4376	down
gene29502	1.28548	0.911043	0.852143	9.33073	10.57	10.5153	up
gene11546	20.7312	29.0636	19.1704	0.0952832	0	0	down
gene21245	3.66056	6.04243	3.45012	0	0	0	down
gene21416	0	0	0	35.571	36.3036	38.4659	up
gene27324	52.5941	52.9492	45.49	0	0	0.345775	down
gene946	0	0	0.0401725	1.84538	0.984698	1.07907	up
gene14743	1.11979	1.80205	2.09941	5.79019	5.36894	10.1453	up
gene27233	1.84054	2.58379	3.70653	0.269752	0.299022	0.155219	down
gene6038	1.19066	1.65716	1.48219	51.2869	37.0675	45.8524	up
gene12313	12.397	12.3554	12.0717	0.121937	0	0.0600965	down
gene35976	2.07972	1.49743	2.07712	0.136847	0.268368	0.079514	down
gene36613	7.84734	7.71608	7.77057	1.78657	1.94365	1.5308	down
gene29569	4.23084	6.53497	4.01163	22.3356	23.298	28.981	up
Walnut_newGene_4102	5.77905	12.1946	5.5596	19.6539	17.7913	16.1249	up
gene24264	0.259736	0.945618	0.501411	3.88972	3.54357	4.06135	up
gene10984	30.4596	28.5017	30.2238	0.770919	0.0754249	0.232152	down
gene27446	4.02683	5.16743	5.12275	0.240726	0.0718321	0	down
gene36102	4.36274	5.03498	3.76048	0.142021	0.0904426	0.0702854	down
gene5977	3.26189	2.06278	3.08495	0	0	0	down
gene35767	0.750167	0.596167	0.707166	3.85587	4.64107	4.6548	up
gene27594	0.757058	1.40193	1.03077	0.153309	0.259642	0.267921	down
gene4461	0.258826	0.176571	0.499999	2.22454	2.14015	2.47303	up
gene5799	0.710217	0.746907	0.760239	0.172453	0.178332	0.153374	down
gene554	1.38092	1.28365	1.83249	8.68432	5.37994	5.96944	up
gene8072	21.828	23.5176	23.988	6.02213	5.72922	4.97795	down
gene378	25.8241	25.33	25.7021	4.52873	4.09149	2.53654	down
gene6419	1.11067	0.940694	0.93058	0.224561	0.356974	0.137218	down
gene14686	0.057413	0	0	1.98164	0.904292	1.05938	up
gene21274	3.47267	2.91948	3.87818	0	0.144362	0.0829366	down
gene34074	124.697	149.476	152.003	18.172	15.7435	17.7007	down
gene13383	0.0570359	0.213349	0.129416	0.673489	0.477146	0.585011	up
Walnut_newGene_3974	0.166532	0.276803	0.200545	1.0313	1.21301	1.01856	up
gene2801	1.16126	1.0963	1.02389	0.22526	0.352526	0.12841	down
gene26443	0.665219	0.561774	0.508044	0.0234135	0	0	down
gene34373	0	0	0	0.990276	0.666587	1.32215	up
gene3016	0.848208	0.986672	0.854692	0	0	0	down
gene4394	4.13525	4.83008	5.09474	0	0.0351608	0	down
gene40753	0.631252	0.561886	0.688222	8.43765	4.55786	4.84305	up
gene30811	0	0	0.068313	5.05925	4.13149	5.50164	up
gene30982	8.88168	7.42344	7.87807	81.8351	77.0562	77.3812	up
gene38752	0.773579	0.714037	0.248992	2.32556	2.13323	3.17483	up
gene1679	6.71351	5.43428	7.0042	0.927984	0.513961	0.51045	down
gene20565	5.70061	5.4357	5.8782	0	0	0	down
gene9143	16.0145	18.8903	16.8907	4.93285	1.8445	2.34837	down
gene9417	22.8011	22.2788	21.7091	1.08998	1.28132	0.910134	down
gene36558	466.169	459.383	412.943	7.19964	5.8966	7.21692	down
gene41537	14.3827	15.6955	13.8107	0	0	0	down
gene9081	2.42931	3.37895	2.31429	0	0	0	down
gene31192	10.4042	10.5653	8.62309	0	0.222278	0.354098	down
gene7384	44.105	45.0575	45.1093	3.62356	3.83942	2.50867	down
gene36062	37.92	38.254	40.3287	8.85508	4.27171	6.44625	down
gene36243	105.073	105.222	103.427	20.1016	18.6516	17.9167	down
gene17256	0.305259	0.195145	0.355556	27.8427	30.6383	26.4066	up
gene40567	5.67725	4.33747	5.41215	1.12529	0.833974	0.45771	down
gene15962	1.56537	1.97232	1.61137	8.91611	6.76593	12.296	up
gene9809	47.3535	54.1031	51.4102	9.91679	21.8976	6.87638	down
gene1369	13.3596	13.888	13.1608	3.33647	2.86374	3.47297	down
gene20645	0.162368	0.341311	0.15666	4.0099	2.4816	3.68735	up
gene17734	0.15229	0.158814	0.147153	1.89295	1.62874	1.40612	up
gene34583	2213.74	2221.27	2124.5	186.623	583.864	258.918	down
gene2707	178.089	181.402	168.303	6.04895	8.11784	6.04885	down
gene5961	8.91368	8.97518	8.91584	48.5396	51.3671	49.8494	up
gene15576	8.67316	9.9704	9.55569	2.24155	1.75907	1.94616	down
gene20346	0.816714	0.679522	0.888099	0.0481982	0.0716188	0.0551302	down
gene42653	0	0.16175	0.145219	12.3153	12.5691	11.9785	up
gene6493	875.762	873.66	845.383	5189.87	5445.77	5784.8	up
gene34578	20.5076	17.7556	20.2396	6.32881	2.7957	1.65653	down
gene39177	1.61667	1.53744	1.59669	0	0	0	down
gene27253	14.8302	18.4325	14.2278	4.67406	3.08447	1.01616	down
gene7878	20.0835	18.1033	17.4649	1.15324	6.36331	0.529996	down
gene27769	71.0077	66.7622	67.6994	12.2907	11.6445	10.8604	down
gene31136	0.345286	0.588395	0.632944	4.24364	2.23063	2.68609	up
gene38535	18.3214	18.5278	19.0453	1.00224	0.954691	1.46593	down
gene38539	2.978	2.26049	2.23811	19.7088	10.6695	15.0169	up
gene24820	2.62425	3.25047	2.4041	0	0	0	down
Walnut_newGene_348	1.35342	1.20825	1.38849	0.111515	0.175127	0.469702	down
gene33202	8.08429	9.56181	7.14793	72.6401	56.6905	67.7737	up
gene24015	0.116402	0.207772	0.212496	13.3768	12.4509	12.763	up
gene3642	124.784	132.7	134.443	32.1154	30.2933	26.1389	down
gene22998	29.826	31.8987	30.8797	5.48542	2.57604	4.17225	down
gene37675	0.948443	1.19296	0.49946	6.83771	6.55828	4.72187	up
[truncated: 1,040 more rows]
