# Supplementary material for: Comparative Transcriptome Analysis of Genes Involved in Anthocyanin Biosynthesis in Red and Green Walnut (Juglans regia L.)
Source: Molecules. 2017 Dec 22;23(1):25. doi: 10.3390/molecules23010025 (PMC5943948; doi:10.3390/molecules23010025)
Supplement: Supplementary file 1 [file molecules-23-00025-s001.zip › S3 Table. Differentially expressed genes (DEGs) and their Nr annotations in each comparative group..xls]

## Sheet: RYvsNY
Differentially expressed genes (DEGs) and their Nr annotation in RYvsNY
Gene ID	FDR	log2FC	NR_annotation
gene34638	5.91238e-54	2.8461	Phospholipase D beta 1 [Theobroma cacao]
gene33563	8.3169e-08	-3.96095	PREDICTED: microtubule-associated protein TORTIFOLIA1 [Prunus mume]
gene16804	4.68267e-14	-5.73421	pollen specific protein sf21, putative [Ricinus communis]
gene888	3.80189e-14	#NAME?	C2H2-like zinc finger protein [Theobroma cacao]
gene15535	2.69694e-13	-2.18361	PREDICTED: probable LRR receptor-like serine/threonine-protein kinase At4g20940 [Prunus mume]
Walnut_newGene_1610	6.16943e-07	2.50553	PREDICTED: non-symbiotic hemoglobin 2 [Nicotiana tomentosiformis]
gene13881	1.22458e-05	-2.20683	PREDICTED: protein BREAST CANCER SUSCEPTIBILITY 1 homolog [Vitis vinifera]
gene10772	2.30189e-10	-4.62925	hypothetical protein POPTR_0010s06010g [Populus trichocarpa]
gene35026	2.12388e-06	#NAME?	PREDICTED: LOW QUALITY PROTEIN: leucine-rich repeat extensin-like protein 4 [Populus euphratica]
gene23311	6.74956e-61	2.94925	glutamine synthetase [Boehmeria nivea]
gene35294	3.48159e-06	-3.09051	PREDICTED: uncharacterized protein LOC103418171 [Malus domestica]
Walnut_newGene_2393	1.16679e-12	Inf	PREDICTED: probable WRKY transcription factor 65 [Pyrus x bretschneideri]
gene21521	4.56785e-98	4.25517	PREDICTED: TMV resistance protein N-like [Glycine max]
gene32759	1.30812e-06	-4.00329	PREDICTED: uncharacterized protein LOC102614771 [Citrus sinensis]
gene12452	3.86203e-08	-3.5193	Golgin subfamily A member 4 [Theobroma cacao]
gene7458	3.15246e-08	-3.81375	PREDICTED: uncharacterized protein LOC100252458 isoform X1 [Vitis vinifera]
gene17727	3.59813e-118	#NAME?	hypothetical protein PRUPE_ppa013836mg [Prunus persica]
gene29936	3.04094e-51	2.77158	PREDICTED: copper transporter 1-like [Fragaria vesca subsp. vesca]
gene13345	0.000983079	-2.37868	EF-hand calcium-binding domain-containing protein 4A [Theobroma cacao]
gene27065	1.72142e-91	2.88726	hypothetical protein JCGZ_00422 [Jatropha curcas]
gene12199	8.16373e-06	-2.44944	PREDICTED: transcription factor TCP14 [Nelumbo nucifera]
gene978	4.22207e-62	3.66718	Ethylene-responsive transcription factor 1B [Morus notabilis]
gene23143	3.73227e-19	-8.04539	PREDICTED: O-acyltransferase WSD1-like [Eucalyptus grandis]
gene28159	1.68297e-26	-8.64104	hypothetical protein POPTR_0010s08670g [Populus trichocarpa]
gene10507	2.16203e-18	-5.95343	hypothetical protein L484_002557 [Morus notabilis]
gene34983	9.94295e-54	2.08636	PT1 [Solanum melongena]
gene35555	1.3501e-08	4.24984	conserved hypothetical protein [Ricinus communis]
gene7013	1.65561e-62	2.25103	PREDICTED: cysteine-rich receptor-like protein kinase 10 isoform X1 [Vitis vinifera]
gene40195	1.31159e-15	Inf	PREDICTED: wall-associated receptor kinase-like 22 [Malus domestica]
gene36659	0.000361861	-2.7272	hypothetical protein PRUPE_ppa005864mg [Prunus persica]
gene30725	8.33202e-18	2.7056	hypothetical protein PRUPE_ppa012756mg [Prunus persica]
gene14809	8.49877e-10	Inf	hypothetical protein JCGZ_26154 [Jatropha curcas]
gene32385	1.09215e-18	-5.77214	hypothetical protein PRUPE_ppa023239mg [Prunus persica]
gene35191	1.85373e-19	2.37962	PREDICTED: MLP-like protein 43-like [Fragaria vesca subsp. vesca]
Walnut_newGene_3973	8.57954e-12	2.31891	PREDICTED: phosphatidylinositol transfer protein 1-like isoform X3 [Vitis vinifera]
gene17432	5.11158e-39	2.4097	PREDICTED: chaperone protein dnaJ 11, chloroplastic [Cucumis melo]
Walnut_newGene_6972	1.19924e-07	2.30627	PREDICTED: UDP-glycosyltransferase 87A1-like [Eucalyptus grandis]
gene39672	3.96369e-45	3.18608	Disease resistance family protein / LRR family protein, putative [Theobroma cacao]
gene4793	1.3325e-25	3.97375	PREDICTED: probable receptor-like protein kinase At1g67000 [Prunus mume]
Walnut_newGene_5891	5.31427e-57	#NAME?	PREDICTED: structural maintenance of chromosomes protein 4-like isoform X1 [Glycine max]
gene8597	7.63213e-70	-4.70731	PREDICTED: glucan endo-1,3-beta-glucosidase, basic isoform-like [Prunus mume]
gene40364	2.66393e-14	-4.01926	hypothetical protein JCGZ_20650 [Jatropha curcas]
gene39367	3.28328e-39	3.22435	Transmembrane amino acid transporter family protein isoform 4 [Theobroma cacao]
gene21208	3.83803e-06	-5.28598	hypothetical protein CISIN_1g001663mg [Citrus sinensis]
gene11030	4.31248e-20	2.34943	PREDICTED: dirigent protein 2-like [Prunus mume]
gene39966	1.42937e-26	4.44648	PREDICTED: cellulose synthase-like protein E6 isoform X1 [Vitis vinifera]
gene43283	4.76059e-108	4.20249	hypothetical protein PRUPE_ppa014815mg [Prunus persica]
gene39382	2.29081e-100	4.58211	cytochrome P450 CYP94A1 family protein [Populus trichocarpa]
gene13664	1.70427e-31	-3.26597	conserved hypothetical protein [Ricinus communis]
gene23664	6.24378e-27	8.6341	PREDICTED: 39S ribosomal protein L41-A, mitochondrial-like [Nelumbo nucifera]
gene4587	7.44253e-05	-7.98146	hypothetical protein POPTR_0016s11950g [Populus trichocarpa]
gene446	9.19671e-17	-3.09779	PREDICTED: uncharacterized protein LOC100257638 isoform X3 [Vitis vinifera]
gene33337	4.03628e-11	-4.09311	PREDICTED: cytochrome P450 703A2 [Prunus mume]
gene22942	1.98893e-115	-10.8053	Ribosomal protein S24e family protein [Theobroma cacao]
gene31590	6.74373e-23	-7.11014	Leucine-rich receptor-like protein kinase family protein [Theobroma cacao]
gene4955	0.000419317	-2.21319	hypothetical protein L484_013156 [Morus notabilis]
Walnut_newGene_7013	8.69089e-38	3.32414	hypothetical protein JCGZ_09094 [Jatropha curcas]
gene38826	1.59094e-25	-2.14981	PREDICTED: anthocyanidin 3-O-glucosyltransferase 5-like [Populus euphratica]
gene25195	5.12929e-16	-8.75463	germin-like protein 2 precursor [Vitis vinifera]
gene20543	1.32058e-12	Inf	PREDICTED: protein FAR1-RELATED SEQUENCE 6-like isoform X1 [Glycine max]
gene21944	1.04796e-155	-9.72234	PREDICTED: 60S ribosomal protein L7-2-like [Nelumbo nucifera]
gene32163	1.22126e-22	#NAME?	SP1L, putative [Ricinus communis]
gene30040	1.69328e-06	-2.94489	PREDICTED: nuclear transcription factor Y subunit A-3-like [Populus euphratica]
gene30063	2.03832e-15	-4.72669	PREDICTED: laccase-14-like [Eucalyptus grandis]
Walnut_newGene_3773	2.97658e-19	-5.05004	hypothetical protein VITISV_012710 [Vitis vinifera]
gene30713	5.94197e-14	-2.04386	PREDICTED: actin-97-like [Cucumis sativus]
gene32327	0.000454681	-2.48856	PREDICTED: heterodimeric geranylgeranyl pyrophosphate synthase large subunit 1, chloroplastic-like [Citrus sinensis]
Walnut_newGene_4200	1.18585e-05	-2.65866	hypothetical protein VITISV_021584 [Vitis vinifera]
gene42268	5.51383e-11	-6.7968	PREDICTED: probable inactive receptor kinase At2g26730 [Populus euphratica]
gene9710	2.50781e-13	2.52179	hypothetical protein PRUPE_ppa010064mg [Prunus persica]
gene37603	1.24907e-07	-2.54239	O-Glycosyl hydrolases family 17 protein [Theobroma cacao]
gene10700	2.68207e-11	-2.69139	PREDICTED: uncharacterized protein At4g00950 [Prunus mume]
gene32062	8.19803e-33	-4.92835	unnamed protein product [Vitis vinifera]
gene40462	6.97431e-53	-3.3032	GATA transcription factor 9 [Morus notabilis]
gene6825	3.77007e-07	2.70078	Uncharacterized protein isoform 1 [Theobroma cacao]
gene9732	6.29167e-22	-2.49939	hypothetical protein POPTR_0001s01730g [Populus trichocarpa]
Walnut_newGene_4099	0.000191196	#NAME?	Calcium-binding EF-hand family protein, putative [Theobroma cacao]
gene31770	2.72907e-19	#NAME?	hypothetical protein POPTR_0016s01740g [Populus trichocarpa]
gene36395	1.15497e-42	-7.89116	conserved hypothetical protein [Ricinus communis]
gene24643	7.35376e-19	3.14714	PREDICTED: equilibrative nucleotide transporter 3-like [Eucalyptus grandis]
gene5018	1.35355e-28	3.36531	GRAM domain family protein [Theobroma cacao]
gene20035	4.07343e-32	4.51728	putative leucine-rich repeat transmembrane protein kinase [Populus trichocarpa]
gene28270	4.56877e-23	#NAME?	hypothetical protein PRUPE_ppa018836mg [Prunus persica]
gene6192	7.54112e-32	-4.35678	PREDICTED: probable receptor-like protein kinase At5g15080 [Vitis vinifera]
gene23562	2.07951e-50	2.27434	PREDICTED: calcium-binding protein CML24-like isoform 1 [Glycine max]
gene19241	2.26721e-11	Inf	glyceraldehyde-3-phosphate dehydrogenase [Betula luminifera]
gene17385	1.99859e-18	Inf	PREDICTED: putative alpha-xylosidase 2 [Prunus mume]
gene2607	3.24951e-64	2.33495	PREDICTED: cyclic nucleotide-gated ion channel 1-like [Malus domestica]
gene23997	1.46362e-10	-2.2458	PREDICTED: dolichyl-diphosphooligosaccharide--protein glycosyltransferase subunit 1A [Vitis vinifera]
gene1745	2.11884e-52	2.22557	hypothetical protein L484_020868 [Morus notabilis]
gene23745	6.77392e-56	2.11525	phosphate transporter [Manihot esculenta]
gene15399	6.37069e-08	#NAME?	RecName: Full=Flavonol synthase/flavanone 3-hydroxylase; AltName: Full=CitFLS; Short=FLS [Citrus unshiu]
gene41541	0.000611033	2.38817	hypothetical protein CISIN_1g036938mg [Citrus sinensis]
gene21153	4.53989e-11	2.4478	PREDICTED: beta-amyrin synthase-like [Malus domestica]
gene42240	1.49923e-08	-7.13154	Metalloendoproteinase 1 precursor, putative [Ricinus communis]
gene5993	2.84858e-09	#NAME?	PREDICTED: TMV resistance protein N-like isoform X3 [Pyrus x bretschneideri]
gene20031	1.58383e-17	-7.87421	cyclin-dependent kinase [Juglans nigra x Juglans regia]
gene42216	1.66344e-11	6.89273	Amino acid permease isoform 2 [Theobroma cacao]
gene42062	1.31995e-09	#NAME?	PREDICTED: mavicyanin [Populus euphratica]
gene28189	1.31653e-45	2.87041	PREDICTED: probable receptor-like protein kinase At1g67000 [Vitis vinifera]
gene25247	1.75759e-11	-2.43247	PREDICTED: somatic embryogenesis receptor kinase 1-like [Eucalyptus grandis]
gene11560	1.34596e-32	4.67681	PREDICTED: cytochrome P450 82C4-like [Malus domestica]
gene25177	1.60236e-43	2.13429	hypothetical protein PHAVU_002G332000g [Phaseolus vulgaris]
gene32619	4.10615e-21	-2.0896	Serine carboxypeptidase-like 35 [Theobroma cacao]
gene21102	2.96528e-08	-3.33511	hypothetical protein PRUPE_ppa020794mg [Prunus persica]
gene9615	6.68657e-09	2.88185	hypothetical protein POPTR_0001s15890g [Populus trichocarpa]
gene36678	1.83015e-12	-3.88992	hypothetical protein ZEAMMB73_313798 [Zea mays]
gene10002	1.41182e-09	-5.64482	PREDICTED: uncharacterized protein LOC101294772 isoform 1 [Fragaria vesca subsp. vesca]
Walnut_newGene_929	4.55452e-07	-2.07178	hypothetical protein PRUPE_ppa024761mg [Prunus persica]
gene12339	5.52825e-07	-2.61507	Myb domain protein 17 isoform 1 [Theobroma cacao]
gene41837	0.000124041	2.07026	hypothetical protein POPTR_0012s14080g [Populus trichocarpa]
gene23165	9.22698e-08	-6.66558	PREDICTED: TMV resistance protein N-like [Pyrus x bretschneideri]
gene20810	0.000499931	-4.52458	Heavy metal transport/detoxification superfamily protein, putative isoform 1 [Theobroma cacao]
gene12678	0.000200576	5.68998	PREDICTED: probable receptor-like protein kinase At5g20050 [Vitis vinifera]
gene42105	2.92745e-72	-4.8091	hypothetical protein PRUPE_ppa012312mg [Prunus persica]
gene28188	5.72431e-42	2.65645	PREDICTED: glycerophosphodiester phosphodiesterase protein kinase domain-containing GDPDL2-like [Populus euphratica]
gene39434	0.00025174	-4.31707	hypothetical protein POPTR_0005s24750g [Populus trichocarpa]
gene35045	4.91665e-26	-3.62318	RecName: Full=CASP-like protein XL3; AltName: Full=CASP-like protein 2C1; Short=GhCASPL2C1 [Gossypium hirsutum]
gene29344	6.91535e-06	-2.0377	cinnamoyl-CoA reductase 1 [Betula platyphylla]
gene29212	2.30978e-06	-3.48881	hypothetical protein CISIN_1g013734mg [Citrus sinensis]
gene31955	2.83889e-08	-5.24393	PREDICTED: uncharacterized protein LOC103633398 [Zea mays]
gene7075	9.32641e-99	-7.3424	hypothetical protein PRUPE_ppa008058mg [Prunus persica]
gene23578	9.27721e-05	Inf	hypothetical protein POPTR_0012s08770g [Populus trichocarpa]
gene5276	6.36631e-08	#NAME?	hypothetical protein EUGRSUZ_H04787 [Eucalyptus grandis]
gene25150	1.99534e-74	2.53614	WRKY family transcription factor [Theobroma cacao]
gene32198	9.14755e-14	-8.86592	COBRA-like protein 4 [Gossypium arboreum]
gene30801	9.44952e-22	-4.78605	hypothetical protein JCGZ_19934 [Jatropha curcas]
gene39125	2.0094e-19	2.26592	hypothetical protein POPTR_0025s00430g [Populus trichocarpa]
gene75	5.18548e-08	2.84861	PREDICTED: ferric reduction oxidase 7, chloroplastic-like [Fragaria vesca subsp. vesca]
gene10015	9.98927e-19	-6.5927	PREDICTED: GDSL esterase/lipase At1g54790 isoform X3 [Eucalyptus grandis]
gene23663	2.34441e-49	2.3956	Uncharacterized protein TCM_001041 [Theobroma cacao]
gene22776	2.25532e-14	Inf	PREDICTED: bark storage protein A [Nelumbo nucifera]
gene14540	6.2077e-27	-2.47398	hypothetical protein CICLE_v10002401mg [Citrus clementina]
gene21958	2.69142e-12	#NAME?	hypothetical protein L484_016045 [Morus notabilis]
Walnut_newGene_1698	6.23067e-11	#NAME?	--
gene41459	4.02125e-07	2.9219	PREDICTED: mitochondrial uncoupling protein 5-like [Cucumis sativus]
gene16551	1.93493e-12	-3.78197	PREDICTED: inactive protein RESTRICTED TEV MOVEMENT 2 [Beta vulgaris subsp. vulgaris]
gene31718	4.87262e-08	-2.07793	Alpha/beta-Hydrolases superfamily protein [Theobroma cacao]
gene29381	1.91088e-08	-2.97208	PREDICTED: CLAVATA3/ESR (CLE)-related protein 9-like [Citrus sinensis]
gene5063	2.52884e-42	3.35975	PREDICTED: cysteine-rich receptor-like protein kinase 2 [Pyrus x bretschneideri]
gene1651	8.94505e-35	-4.57729	Transcription factor [Theobroma cacao]
gene3571	3.14807e-09	-2.72797	hypothetical protein L484_017843 [Morus notabilis]
gene30983	7.12427e-146	4.31645	Leucine-rich repeat protein kinase family protein isoform 2 [Theobroma cacao]
gene27093	5.46797e-16	#NAME?	hypothetical protein JCGZ_12078 [Jatropha curcas]
gene36001	0.000619611	-2.46721	Auxin-responsive IAA29 -like protein [Gossypium arboreum]
gene40374	2.25136e-12	2.99408	PREDICTED: protein P21-like [Prunus mume]
gene21561	5.32521e-18	-3.35715	PREDICTED: uncharacterized protein LOC103699645, partial [Phoenix dactylifera]
gene3233	4.02439e-05	2.05166	PREDICTED: premnaspirodiene oxygenase-like [Prunus mume]
gene6096	1.49083e-52	3.82925	PREDICTED: ethylene-responsive transcription factor ERF105 [Prunus mume]
gene6462	5.16629e-101	2.96735	Transmembrane amino acid transporter family protein [Theobroma cacao]
gene36691	4.19465e-10	#NAME?	hypothetical protein JCGZ_11047 [Jatropha curcas]
gene32176	3.39106e-07	2.66858	PREDICTED: receptor-like protein kinase FERONIA [Prunus mume]
Walnut_newGene_5896	3.92865e-08	-2.08374	PREDICTED: amino acid permease 3-like [Eucalyptus grandis]
gene14373	1.12465e-19	Inf	Uncharacterized protein isoform 2 [Theobroma cacao]
gene25770	1.95696e-78	4.51711	PREDICTED: leucine-rich repeat receptor protein kinase EXS-like isoform X1 [Vitis vinifera]
gene3494	5.88658e-39	-3.98166	PREDICTED: demethylmenaquinone methyltransferase-like [Fragaria vesca subsp. vesca]
Walnut_newGene_5063	6.14475e-11	Inf	hypothetical protein PRUPE_ppa022115mg [Prunus persica]
gene17843	6.12306e-05	2.46632	Senescence-related gene 1 [Theobroma cacao]
gene7355	7.72443e-05	-2.51696	hypothetical protein JCGZ_11455 [Jatropha curcas]
gene33360	7.74635e-22	-4.69681	Myb domain protein 7, putative [Theobroma cacao]
gene13910	8.7658e-19	4.29344	PREDICTED: G-type lectin S-receptor-like serine/threonine-protein kinase At1g67520 [Vitis vinifera]
gene3030	0.000313096	-2.28755	Uncharacterized protein TCM_005888 [Theobroma cacao]
gene33988	2.00721e-08	-5.92781	PREDICTED: mannan endo-1,4-beta-mannosidase 6 [Prunus mume]
Walnut_newGene_986	0.000928001	#NAME?	hypothetical protein POPTR_0012s01755g [Populus trichocarpa]
gene26388	1.13377e-14	-2.13539	hypothetical protein CICLE_v10011672mg [Citrus clementina]
gene24836	0.000443015	-2.52434	hypothetical protein PRUPE_ppb004066mg [Prunus persica]
gene17215	5.11279e-27	-3.18634	hypothetical protein PRUPE_ppa003787mg [Prunus persica]
gene12826	0.000406047	-4.0169	putative beta-D-xylosidase 2 -like protein [Gossypium arboreum]
gene23278	6.62592e-30	6.99351	PREDICTED: aspartic proteinase-like protein 1 isoform X2 [Prunus mume]
gene28302	0.000717325	-2.23064	PREDICTED: alkaline/neutral invertase CINV2-like [Populus euphratica]
gene14396	6.42823e-08	-4.5545	Serine/threonine-protein kinase WNK-related [Theobroma cacao]
gene27068	7.35036e-140	3.65467	PREDICTED: mitoferrin-like [Prunus mume]
gene23115	1.52888e-10	#NAME?	PREDICTED: trihelix transcription factor GTL2-like [Populus euphratica]
gene1368	6.5335e-21	-4.59428	PREDICTED: protein YABBY 4 [Vitis vinifera]
gene13818	1.1977e-16	#NAME?	PREDICTED: xylem serine proteinase 1-like [Fragaria vesca subsp. vesca]
gene1381	9.19002e-07	-2.99373	hypothetical protein PRUPE_ppa009247mg [Prunus persica]
gene41894	1.42706e-18	-3.87338	hypothetical protein PRUPE_ppa022232mg [Prunus persica]
gene42051	5.82586e-20	4.14334	hypothetical protein JCGZ_26298 [Jatropha curcas]
gene40807	1.9991e-24	-7.94896	hypothetical protein PRUPE_ppa025692mg [Prunus persica]
gene31959	5.02982e-54	-8.25031	unknown [Medicago truncatula]
gene38973	5.32266e-140	10.1109	PREDICTED: uncharacterized protein LOC100243949 [Vitis vinifera]
gene11374	5.25157e-10	-4.41478	hypothetical protein JCGZ_03844 [Jatropha curcas]
gene6137	2.14895e-50	-6.60185	hypothetical protein JCGZ_20123 [Jatropha curcas]
gene33131	7.72827e-32	-8.9482	PREDICTED: 39S ribosomal protein L41-A, mitochondrial-like [Nelumbo nucifera]
gene17343	1.7881e-59	Inf	PREDICTED: uncharacterized protein LOC104595663 [Nelumbo nucifera]
gene39324	1.07835e-11	Inf	superoxide dismutase 1 copper chaperone [Gossypium arboreum]
gene13943	1.46684e-35	-2.15405	DnaJ-like protein [Betula luminifera]
gene40187	6.93323e-67	-2.33558	hypothetical protein VITISV_032929 [Vitis vinifera]
gene16425	7.29291e-06	-2.88556	PREDICTED: glucan endo-1,3-beta-glucosidase 14 isoform X1 [Vitis vinifera]
gene40933	3.80976e-215	-5.53564	tubulin alpha chain, putative [Ricinus communis]
gene32472	0.000269371	-2.6432	zinc finger family protein [Populus trichocarpa]
gene17694	4.20435e-21	Inf	PREDICTED: ras-related protein RABA1d-like [Citrus sinensis]
gene28812	1.84893e-12	#NAME?	PREDICTED: RAB6-interacting golgin-like [Malus domestica]
gene22684	2.96346e-07	2.34446	PREDICTED: TMV resistance protein N-like [Pyrus x bretschneideri]
gene10095	1.60793e-08	-2.98371	hypothetical protein CISIN_1g011118mg [Citrus sinensis]
gene42518	1.07641e-38	3.15252	PREDICTED: uncharacterized protein LOC100243949 [Vitis vinifera]
gene5102	1.97046e-12	-2.34453	PREDICTED: RNA-binding protein 24 isoform X1 [Vitis vinifera]
Walnut_newGene_7036	7.37584e-19	#NAME?	TPA: hypothetical protein ZEAMMB73_660666 [Zea mays]
gene26374	7.80805e-111	7.3215	hypothetical protein PRUPE_ppa015120mg [Prunus persica]
gene36707	2.55233e-11	-2.11952	PREDICTED: fasciclin-like arabinogalactan protein 4 [Prunus mume]
gene10306	2.13345e-41	-2.3141	Copper binding protein 9, putative [Theobroma cacao]
gene33583	1.66111e-06	-5.03611	PREDICTED: putative glutamine amidotransferase YLR126C [Vitis vinifera]
gene7722	1.29972e-11	4.81101	PREDICTED: cytokinin riboside 5&apos;-monophosphate phosphoribohydrolase LOG5-like [Vitis vinifera]
gene22059	1.48097e-13	#NAME?	hypothetical protein PRUPE_ppa001576mg [Prunus persica]
gene39736	3.81973e-63	#NAME?	hypothetical protein CICLE_v10025646mg [Citrus clementina]
gene32929	7.87179e-10	#NAME?	hypothetical protein MTR_5g029660 [Medicago truncatula]
gene29775	1.88821e-07	-3.64341	hypothetical protein L484_007751 [Morus notabilis]
gene31272	5.23032e-07	3.07776	hypothetical protein POPTR_0001s01730g [Populus trichocarpa]
gene17810	2.77123e-15	3.06674	hypothetical protein CICLE_v10002961mg [Citrus clementina]
gene17270	7.64471e-08	2.60278	hypothetical protein PRUPE_ppa000316mg [Prunus persica]
gene6698	3.27012e-12	#NAME?	flavonoid 3&apos;,5&apos;-methyltransferase [Vitis vinifera]
gene8040	0.000773869	-4.87627	hypothetical protein JCGZ_21081 [Jatropha curcas]
gene28875	2.00556e-40	2.09886	conserved hypothetical protein [Ricinus communis]
gene851	1.93129e-06	-2.59985	SPX (SYG1/Pho81/XPR1) domain-containing protein / zinc finger (C3HC4-type RING finger) protein-related [Theobroma cacao]
gene1349	5.35604e-10	5.24477	hypothetical protein PRUPE_ppa019218mg [Prunus persica]
gene5215	4.27992e-06	-2.54666	C2 calcium/lipid-binding plant phosphoribosyltransferase family protein [Theobroma cacao]
gene12604	4.83507e-11	#NAME?	Xanthine/uracil permease family protein isoform 1 [Theobroma cacao]
gene19302	2.92864e-11	#NAME?	PREDICTED: UDP-glycosyltransferase 89A2-like [Malus domestica]
gene11548	9.44288e-12	-2.41938	hypothetical protein VITISV_017203 [Vitis vinifera]
gene29846	8.59078e-115	-3.75974	hypothetical protein POPTR_0001s26630g [Populus trichocarpa]
gene38381	8.73825e-07	2.178	PREDICTED: mitochondrial thiamine pyrophosphate carrier-like [Pyrus x bretschneideri]
gene31967	8.57154e-34	#NAME?	hypothetical protein MTR_3g079390 [Medicago truncatula]
gene14338	1.12046e-43	-8.47362	PREDICTED: uncharacterized protein LOC103449856 [Malus domestica]
gene29035	4.38986e-11	-3.59577	PREDICTED: uncharacterized protein LOC100264413 [Vitis vinifera]
gene33422	4.87825e-57	-2.4966	UDP-glucose 6-dehydrogenase, putative [Ricinus communis]
gene11523	3.39211e-08	-2.3028	conserved hypothetical protein [Ricinus communis]
gene14825	3.72673e-17	-5.53473	PREDICTED: cytokinin riboside 5&apos;-monophosphate phosphoribohydrolase LOG5 [Prunus mume]
gene6514	5.29997e-25	2.56717	STS14 protein precursor, putative [Ricinus communis]
gene13663	0.000560064	-4.68013	PREDICTED: S-type anion channel SLAH2-like [Malus domestica]
gene31802	6.12745e-80	9.28409	Cytochrome P450 82A3, putative isoform 1 [Theobroma cacao]
gene20792	1.11817e-20	-4.72033	PREDICTED: FK506-binding protein 5-like [Malus domestica]
gene40934	6.92696e-07	-4.38641	Receptor protein kinase CLAVATA1 precursor, putative [Ricinus communis]
gene4090	0.000277462	2.36584	PREDICTED: transcription factor RAX2 [Populus euphratica]
gene23297	7.14382e-35	#NAME?	signal transducer, putative [Ricinus communis]
gene6509	1.02402e-11	5.69803	Kinase [Theobroma cacao]
Walnut_newGene_566	2.00096e-55	#NAME?	Hydrolase, hydrolyzing O-glycosyl compounds, putative isoform 1 [Theobroma cacao]
gene25801	4.53961e-28	5.90861	hypothetical protein JCGZ_15779 [Jatropha curcas]
gene42777	2.69513e-12	#NAME?	F-box/RNI-like superfamily protein isoform 3 [Theobroma cacao]
gene39100	3.78518e-100	-12.578	unknown [Glycine max]
gene183	2.79611e-134	-3.58017	PREDICTED: subtilisin-like protease isoform X1 [Malus domestica]
Walnut_newGene_458	3.93395e-08	-5.87036	hypothetical protein CISIN_1g042277mg, partial [Citrus sinensis]
gene4196	1.60354e-07	-2.67558	PREDICTED: probable LRR receptor-like serine/threonine-protein kinase At3g47570 [Prunus mume]
gene13661	3.6978e-08	-2.08208	PREDICTED: reticulon-like protein B1-like [Solanum tuberosum]
gene37162	2.26809e-10	-4.60134	hypothetical protein JCGZ_11773 [Jatropha curcas]
gene42043	6.58727e-57	2.53274	hypothetical protein PRUPE_ppa001518mg [Prunus persica]
gene16725	5.87156e-12	-2.06035	PREDICTED: probable methyltransferase PMT20 [Populus euphratica]
gene8830	3.6229e-64	-2.7758	transcription factor, putative [Ricinus communis]
gene16120	4.5101e-08	-2.97879	hypothetical protein JCGZ_08773 [Jatropha curcas]
gene28171	6.99755e-245	-7.24691	PREDICTED: auxin-responsive protein IAA14 [Prunus mume]
gene30020	3.87757e-24	-2.81626	hypothetical protein JCGZ_25824 [Jatropha curcas]
gene35830	0.000188675	-2.56067	putative LRR receptor-like serine/threonine-protein kinase [Morus notabilis]
gene4816	0.000392742	-2.38463	Cyclin-dependent kinases regulatory subunit 1 [Gossypium arboreum]
gene4696	2.47947e-61	3.3439	PREDICTED: pathogenesis-related genes transcriptional activator PTI5-like [Prunus mume]
gene29257	5.91577e-58	-4.59695	heat-shock protein, putative [Ricinus communis]
gene11408	1.5557e-57	2.3111	PREDICTED: leucine-rich repeat receptor protein kinase EXS-like [Vitis vinifera]
gene30480	8.85293e-29	6.43212	PREDICTED: cytochrome P450 71B34-like isoform 3 [Fragaria vesca subsp. vesca]
gene2027	2.84186e-23	3.43774	hypothetical protein POPTR_0006s12530g [Populus trichocarpa]
gene26402	8.87219e-06	-2.8584	Elicitor-responsive protein, putative [Ricinus communis]
gene34317	1.9144e-06	-2.98812	S-locus lectin protein kinase family protein, putative isoform 1 [Theobroma cacao]
gene7612	1.73979e-07	-4.94736	hypothetical protein CICLE_v10005491mg [Citrus clementina]
gene10659	6.1111e-11	-4.17643	Phospholipase A21 [Theobroma cacao]
gene20158	4.12289e-13	#NAME?	PREDICTED: uncharacterized protein LOC101496078 [Cicer arietinum]
gene14399	0.000853295	2.26329	CC-NBS-LRR protein [Quercus suber]
gene27116	1.35887e-22	-2.22565	hypothetical protein PRUPE_ppa013476mg [Prunus persica]
gene22264	5.50824e-14	-4.9049	hypothetical protein CICLE_v10003574mg, partial [Citrus clementina]
gene24478	8.88455e-16	#NAME?	hypothetical protein PRUPE_ppa025692mg [Prunus persica]
gene36955	9.38334e-29	-5.62316	hypothetical protein JCGZ_18299 [Jatropha curcas]
gene29676	3.95928e-49	5.47171	High mobility group B protein 1 [Morus notabilis]
gene8477	2.65956e-92	-2.88823	PREDICTED: zinc transporter 4, chloroplastic-like isoform X1 [Pyrus x bretschneideri]
gene17378	2.15968e-63	4.02952	Copper transporter, putative [Theobroma cacao]
gene27150	5.26209e-05	-3.143	hypothetical protein PRUPE_ppa001853mg [Prunus persica]
gene26863	2.09615e-12	-4.73363	Uncharacterized protein TCM_002397 [Theobroma cacao]
gene11529	1.0592e-37	-6.8112	RAB GTPase A5B [Theobroma cacao]
gene13017	4.93182e-15	-7.87147	PREDICTED: BTB/POZ domain-containing protein At3g22104 isoform X1 [Prunus mume]
gene12621	7.46427e-21	2.01389	hypothetical protein PRUPE_ppa008932mg [Prunus persica]
gene27762	2.01783e-09	#NAME?	Zinc finger protein 6, putative [Theobroma cacao]
gene987	3.37998e-15	2.11153	PREDICTED: 1-aminocyclopropane-1-carboxylate oxidase homolog 1-like [Prunus mume]
gene36042	3.51203e-10	4.69148	PREDICTED: zinc finger protein 3-like [Vitis vinifera]
Walnut_newGene_6245	4.92078e-08	-2.49513	PREDICTED: LOW QUALITY PROTEIN: ferritin-3, chloroplastic [Prunus mume]
gene42713	3.39242e-14	#NAME?	hypothetical protein CISIN_1g0101761mg, partial [Citrus sinensis]
gene15218	1.0186e-14	-4.14467	PREDICTED: aspartic proteinase [Solanum lycopersicum]
gene8646	4.69154e-11	-4.59144	PREDICTED: coatomer subunit zeta-2-like [Pyrus x bretschneideri]
gene12490	6.20497e-26	2.00981	Methionyl-tRNA synthetase [Theobroma cacao]
gene24300	5.04903e-26	-4.79757	hypothetical protein PRUPE_ppa007350mg [Prunus persica]
Walnut_newGene_5466	1.23481e-38	Inf	hypothetical protein VITISV_026680 [Vitis vinifera]
gene3152	1.90481e-14	-7.78696	hypothetical protein JCGZ_24539 [Jatropha curcas]
gene24271	1.05738e-39	3.43887	hypothetical protein PRUPE_ppa008527mg [Prunus persica]
gene26260	5.11522e-41	#NAME?	hypothetical protein L484_014312 [Morus notabilis]
gene26730	3.06463e-06	#NAME?	unnamed protein product [Vitis vinifera]
gene26878	2.08584e-60	-7.62027	hypothetical protein JCGZ_21220 [Jatropha curcas]
gene12077	3.3286e-06	-2.69848	2-oxoglutarate (2OG) and Fe(II)-dependent oxygenase superfamily protein isoform 1 [Theobroma cacao]
gene25172	2.35778e-14	-7.49425	PREDICTED: vacuolar iron transporter 1.1-like [Eucalyptus grandis]
gene24073	4.42064e-108	3.09055	PREDICTED: adipocyte plasma membrane-associated protein-like [Fragaria vesca subsp. vesca]
gene38972	1.76391e-16	#NAME?	PREDICTED: cyclic nucleotide-gated ion channel 1-like [Malus domestica]
gene13076	2.46532e-24	#NAME?	PREDICTED: lysM domain-containing GPI-anchored protein 2 [Vitis vinifera]
gene4304	1.43368e-112	-6.4772	multidrug resistant ABC transporter family protein [Populus trichocarpa]
gene30870	1.25608e-214	-16.0962	PREDICTED: beta-glucosidase 12-like [Fragaria vesca subsp. vesca]
gene16119	3.01512e-10	2.95628	Late embryogenesis abundant (LEA) hydroxyproline-rich glycoprotein family, putative [Theobroma cacao]
gene32437	1.42978e-11	3.31284	ef-hand calcium binding protein, putative [Ricinus communis]
gene11980	6.52993e-06	-3.67177	PREDICTED: salicylic acid-binding protein 2 [Vitis vinifera]
gene6066	3.50988e-10	-5.09528	PREDICTED: uncharacterized protein LOC100855167 [Vitis vinifera]
gene8852	4.29993e-42	#NAME?	Cysteine/Histidine-rich C1 domain family protein, putative isoform 1 [Theobroma cacao]
gene2858	2.33023e-18	-5.74158	PREDICTED: oligopeptide transporter 1-like [Prunus mume]
gene32364	0.000249856	2.44794	PREDICTED: uncharacterized protein LOC100253584 [Vitis vinifera]
gene27287	1.21246e-08	3.89157	PREDICTED: glycerophosphodiester phosphodiesterase protein kinase domain-containing GDPDL2-like [Vitis vinifera]
gene8183	2.10319e-29	-2.02517	U-box domain-containing protein kinase family protein, putative [Theobroma cacao]
gene13567	7.28098e-33	#NAME?	PREDICTED: ethylene-responsive transcription factor WIN1-like [Glycine max]
gene14655	4.43513e-07	-3.49651	Homeobox from [Theobroma cacao]
Walnut_newGene_5103	2.87579e-115	#NAME?	PREDICTED: cellulose synthase-like protein B4 isoform X1 [Prunus mume]
gene21805	1.23628e-75	Inf	PREDICTED: wall-associated receptor kinase 2-like [Malus domestica]
gene7876	3.16857e-71	2.50574	Transducin/WD40 repeat-like superfamily protein isoform 1 [Theobroma cacao]
gene3975	2.15123e-13	-4.91876	PREDICTED: reticulon-like protein B9 [Cucumis melo]
gene27391	6.62924e-11	-3.23443	PREDICTED: aspartic proteinase PCS1 [Prunus mume]
gene34254	8.60563e-09	#NAME?	hypothetical protein PRUPE_ppa003296mg [Prunus persica]
gene800	6.30632e-14	-2.81735	cinnamoyl-CoA reductase 1 [Betula platyphylla]
gene23563	8.78685e-55	5.38869	PREDICTED: LOW QUALITY PROTEIN: probable leucine-rich repeat receptor-like serine/threonine-protein kinase At3g14840 [Prunus mume]
gene21369	5.63452e-08	3.19265	uncharacterized protein LOC100305628 [Glycine max]
gene13372	1.81677e-07	-3.86973	O-fucosyltransferase family protein isoform 1 [Theobroma cacao]
gene1754	5.52755e-68	-5.50587	PREDICTED: putative lipid-binding protein At4g00165-like [Fragaria vesca subsp. vesca]
gene21804	2.54154e-139	#NAME?	PREDICTED: uncharacterized protein LOC104877802 [Vitis vinifera]
gene41530	7.21439e-21	7.18011	hypothetical protein CISIN_1g036938mg [Citrus sinensis]
gene14663	4.9001e-14	-3.55199	hypothetical protein L484_028016 [Morus notabilis]
gene28466	7.5807e-10	-8.82274	unnamed protein product [Vitis vinifera]
gene38910	1.01565e-19	-2.30032	cinnamyl alcohol acyltransferase 1 [Larrea tridentata]
gene41405	9.85473e-11	2.54249	Kinase, putative [Theobroma cacao]
gene36953	1.30881e-71	8.5686	PREDICTED: DNA-directed RNA polymerase I subunit RPA12 [Pyrus x bretschneideri]
gene40867	2.94651e-17	-7.83865	Laccase 11 [Theobroma cacao]
gene39381	2.6686e-30	-3.84732	cytochrome P450 CYP94A1 family protein [Populus trichocarpa]
gene20558	7.12822e-15	6.86906	conserved hypothetical protein [Ricinus communis]
gene38994	6.91937e-09	-2.72654	O-Glycosyl hydrolases family 17 protein [Theobroma cacao]
gene20899	1.2211e-45	Inf	hypothetical protein MTR_8g040020 [Medicago truncatula]
gene3045	1.05881e-07	-4.45772	hypothetical protein POPTR_0009s06510g [Populus trichocarpa]
gene1297	2.50359e-10	-2.5265	Leucoanthocyanidin dioxygenase isoform 2 [Theobroma cacao]
gene1078	1.35244e-28	3.72884	Uncharacterized protein TCM_010809 [Theobroma cacao]
gene33953	7.29207e-10	-3.13585	hypothetical protein PRUPE_ppa007800mg [Prunus persica]
gene21380	7.57003e-31	-4.36336	PREDICTED: UDP-glucuronate 4-epimerase 6 [Malus domestica]
gene7200	7.54464e-10	-3.50549	Rho guanine nucleotide exchange factor 8 [Morus notabilis]
gene20254	2.47068e-07	2.87808	Aspartic proteinase nepenthesin-1 precursor, putative [Ricinus communis]
gene34030	9.86489e-13	#NAME?	Branchless trichome [Theobroma cacao]
gene7550	7.07912e-06	-2.509	unnamed protein product [Vitis vinifera]
gene20311	4.51129e-103	3.99583	PREDICTED: 7-deoxyloganetic acid glucosyltransferase-like [Populus euphratica]
gene9938	1.21225e-11	-2.17204	PREDICTED: uncharacterized protein LOC100247241 [Vitis vinifera]
Walnut_newGene_3344	7.58618e-22	#NAME?	hypothetical protein VITISV_037907 [Vitis vinifera]
gene23896	4.23509e-09	2.36991	PREDICTED: DNA topoisomerase 2-binding protein 1 [Prunus mume]
gene21896	6.69476e-07	-4.02017	PREDICTED: inactive protein RESTRICTED TEV MOVEMENT 2 [Prunus mume]
gene4770	5.06671e-26	-2.74557	Phototropic-responsive NPH3 family protein isoform 2 [Theobroma cacao]
gene17413	2.43309e-08	2.14536	hypothetical protein POPTR_0005s01640g [Populus trichocarpa]
gene24381	2.32372e-11	-6.88783	hypothetical protein JCGZ_22027 [Jatropha curcas]
gene32926	5.13673e-41	-2.28393	UDP-galactose transporter 3 isoform 1 [Theobroma cacao]
gene36409	3.15354e-08	-3.81549	RNA-binding family protein isoform 1 [Theobroma cacao]
gene17330	1.63121e-06	-2.82279	Uncharacterized protein TCM_008923 [Theobroma cacao]
gene33110	1.39611e-24	#NAME?	PREDICTED: pectinesterase-like [Populus euphratica]
gene12657	4.95952e-08	-2.54743	Cullin-1 [Triticum urartu]
gene24239	1.29018e-27	-5.57238	PREDICTED: rop guanine nucleotide exchange factor 7 [Prunus mume]
Walnut_newGene_1475	2.68818e-30	2.20099	Ribulose bisphosphate carboxylase/oxygenase activase 1, chloroplast precursor, putative [Ricinus communis]
gene17205	2.05031e-38	-4.63991	PREDICTED: probable methyltransferase PMT10 [Populus euphratica]
gene2202	3.54787e-07	-2.27602	ABC transporter family protein [Hevea brasiliensis]
gene8523	4.77677e-11	Inf	hypothetical protein L484_012800 [Morus notabilis]
gene9917	0.000629936	-5.18183	xyloglucan endotransglucosylase [Betula pendula]
gene39511	1.07779e-64	Inf	Histidine triad (Hit) protein, putative [Theobroma cacao]
gene23251	1.8081e-09	-6.37099	U1 small nuclear ribonucleoprotein A [Morus notabilis]
gene6449	7.60448e-13	6.35386	PREDICTED: protein O-linked-mannose beta-1,4-N-acetylglucosaminyltransferase 2-like [Citrus sinensis]
gene10027	1.1527e-07	-6.35038	PREDICTED: uncharacterized GPI-anchored protein At3g06035-like [Prunus mume]
gene14031	3.68045e-08	-5.20934	SKP1 [Hevea brasiliensis]
Walnut_newGene_6669	2.92028e-27	#NAME?	--
Walnut_newGene_6921	3.32075e-05	2.85762	--
gene39567	1.66681e-09	#NAME?	geranyl diphosphate synthase large subunit [Humulus lupulus]
gene41709	1.19968e-33	9.03945	protein binding protein, putative [Ricinus communis]
gene29772	4.23443e-17	-2.0033	GRAS family transcription factor SHR2 [Quercus suber]
Walnut_newGene_5145	1.71279e-09	#NAME?	Glycerol-3-phosphate acyltransferase 5 [Theobroma cacao]
gene320	1.27046e-16	3.28727	RecName: Full=Calcium-binding allergen Bet v 3; AltName: Full=Allergen Bet v III; AltName: Allergen=Bet v 3 [Betula pendula]
gene40250	0.000119566	-2.22403	Glutaredoxin family protein, putative [Theobroma cacao]
gene7068	2.65432e-11	-4.18676	Uncharacterized protein isoform 1 [Theobroma cacao]
gene9038	7.7657e-62	-7.00906	hypothetical protein PRUPE_ppa008922mg [Prunus persica]
gene27276	1.13644e-18	-5.76677	PREDICTED: shikimate kinase 3, chloroplastic isoform X1 [Vitis vinifera]
gene6188	6.35735e-11	6.79255	WRKY DNA-binding protein 72, putative [Theobroma cacao]
Walnut_newGene_1088	6.31329e-20	#NAME?	hypothetical protein POPTR_0002s19080g [Populus trichocarpa]
gene35575	0.000178038	-4.05865	PREDICTED: uncharacterized protein LOC101510841 [Cicer arietinum]
gene5044	2.10089e-16	-7.73741	Glycosyl hydrolase family 81 protein [Theobroma cacao]
gene31299	2.04967e-16	Inf	Receptor like protein 1, putative [Theobroma cacao]
gene14073	7.94069e-47	-6.32592	Drought-responsive family protein isoform 2 [Theobroma cacao]
gene31126	2.06214e-06	-2.19527	amine oxidase, putative [Ricinus communis]
gene39012	2.75525e-07	-3.66973	hypothetical protein CICLE_v10001016mg [Citrus clementina]
gene31393	1.49991e-71	-4.37538	PREDICTED: probable disease resistance protein At4g27220 [Vitis vinifera]
gene31228	7.27131e-07	-2.35143	Plant neutral invertase family protein isoform 1 [Theobroma cacao]
gene32407	9.46341e-16	5.68216	PREDICTED: uncharacterized protein LOC103341137 [Prunus mume]
gene24625	2.21539e-07	-3.69566	BSD domain-containing protein, putative [Theobroma cacao]
gene18228	2.07086e-08	-5.99084	PREDICTED: probable leucine-rich repeat receptor-like protein kinase At1g68400 [Malus domestica]
gene17468	1.073e-06	-2.52573	PREDICTED: monothiol glutaredoxin-S16, chloroplastic [Vitis vinifera]
Walnut_newGene_1726	1.07406e-14	Inf	--
gene32279	8.83583e-10	-3.84326	PREDICTED: NAC domain-containing protein 86 [Vitis vinifera]
gene7790	7.00413e-33	2.17457	PREDICTED: uncharacterized protein LOC103329684 [Prunus mume]
gene13712	3.63969e-17	-4.53032	PREDICTED: basic 7S globulin-like [Nelumbo nucifera]
gene496	9.7872e-05	-3.34422	Serine-rich protein-related [Theobroma cacao]
gene4279	6.25869e-80	-9.21038	hypothetical protein L484_004794 [Morus notabilis]
gene15710	7.45451e-09	5.04339	PREDICTED: uncharacterized protein LOC103337181 [Prunus mume]
gene23080	0.000141633	-2.67928	hypothetical protein POPTR_0005s04590g [Populus trichocarpa]
gene33867	2.61363e-17	-7.22805	Catalytics,transferases, S-malonyltransferases,binding isoform 1 [Theobroma cacao]
gene11962	2.77756e-45	-3.69001	GATA transcription factor 9 [Morus notabilis]
gene23107	3.06735e-40	-2.90541	Fatty acid desaturase 3 [Morus notabilis]
gene30944	4.09794e-40	-8.35241	GTP-binding family protein [Populus trichocarpa]
gene36394	1.71068e-13	#NAME?	hypothetical protein PRUPE_ppa006041mg [Prunus persica]
gene13927	8.95024e-20	2.51915	hypothetical protein POPTR_0005s07350g [Populus trichocarpa]
gene38561	1.09902e-13	-3.61965	PREDICTED: uncharacterized protein LOC105115393 [Populus euphratica]
gene31278	8.56379e-47	-4.22832	PREDICTED: kinesin-related protein 11 isoform X2 [Prunus mume]
gene15092	1.44625e-37	-5.04846	PREDICTED: phosphatidylinositol 4-phosphate 5-kinase 1 [Vitis vinifera]
gene119	4.19465e-10	#NAME?	Carbohydrate-binding protein, putative [Theobroma cacao]
gene23019	3.28973e-34	2.98917	Light-sensor Protein kinase [Morus notabilis]
gene42416	2.21532e-07	-4.35783	PREDICTED: cyclin-D3-1 [Prunus mume]
gene23389	1.48948e-15	-4.06792	PREDICTED: methionine adenosyltransferase 2 subunit beta [Prunus mume]
gene4420	1.04451e-38	2.31312	Leucoanthocyanidin dioxygenase, putative [Theobroma cacao]
gene42410	3.07245e-81	2.75369	UDP-glycosyltransferase 73B4, putative [Theobroma cacao]
gene41234	0.0002466	-2.26865	hypothetical protein PRUPE_ppa002803mg [Prunus persica]
gene13752	3.27772e-78	-4.91641	PREDICTED: receptor-like protein kinase HSL1 [Prunus mume]
gene14987	7.15092e-06	-3.27821	PREDICTED: phosphatidylinositol 4-phosphate 5-kinase 6 [Prunus mume]
Walnut_newGene_4672	6.96863e-05	-2.1882	PREDICTED: 3-oxoacyl-[acyl-carrier-protein] synthase I, chloroplastic [Eucalyptus grandis]
gene30947	2.18071e-09	-5.52553	PREDICTED: uncharacterized protein LOC103332162 [Prunus mume]
gene41971	1.71792e-26	-6.81307	hypothetical protein PRUPE_ppa007039mg [Prunus persica]
Walnut_newGene_5605	3.64742e-107	6.87379	PREDICTED: secoisolariciresinol dehydrogenase-like isoform X1 [Sesamum indicum]
gene28983	0.000649539	-2.88794	GRAS family transcription factor [Theobroma cacao]
gene18060	2.00045e-12	-4.13971	PREDICTED: EG45-like domain containing protein [Prunus mume]
gene15628	8.4383e-82	2.94325	cysteine-rich receptor-kinase-like protein [Medicago truncatula]
gene31442	2.93711e-07	-3.0786	PREDICTED: high mobility group B protein 6 [Vitis vinifera]
gene38250	4.78148e-51	-4.79276	heat shock protein 17.7 [Populus trichocarpa]
gene27009	2.8213e-08	2.94674	Prohibitin 3 isoform 1 [Theobroma cacao]
gene38312	2.39324e-13	#NAME?	Myb domain protein 111, putative [Theobroma cacao]
gene777	5.36182e-11	2.90153	cytochrome P450, putative [Ricinus communis]
gene1367	4.02471e-07	-5.80373	PREDICTED: NAC domain-containing protein 7 [Vitis vinifera]
gene14710	4.23802e-61	-8.35555	PREDICTED: non-specific lipid-transfer protein 1-like [Pyrus x bretschneideri]
gene12231	1.65659e-23	-6.84405	alpha-expansin [Ziziphus jujuba]
gene39797	4.48577e-08	2.36527	Auxin-responsive GH3 family protein [Theobroma cacao]
Walnut_newGene_1963	5.83056e-10	Inf	Inorganic H pyrophosphatase family protein isoform 1 [Theobroma cacao]
gene9794	9.13061e-05	-3.67264	PREDICTED: probable endo-1,4-beta-xylanase C [Prunus mume]
gene7834	4.18468e-15	-2.35897	hypothetical protein JCGZ_21531 [Jatropha curcas]
gene42768	5.82941e-81	3.56295	PREDICTED: uncharacterized protein At1g04910-like [Malus domestica]
gene11414	3.38889e-09	#NAME?	cytochrome P450 family protein [Populus trichocarpa]
gene29921	1.38278e-05	4.35309	SAUR family protein [Theobroma cacao]
gene2816	1.67643e-47	2.2737	PREDICTED: ABC transporter C family member 3-like [Fragaria vesca subsp. vesca]
gene8109	2.06272e-198	4.8583	PREDICTED: transcription factor JUNGBRUNNEN 1-like [Prunus mume]
gene30698	1.31119e-22	-2.48673	PREDICTED: heat shock cognate 70 kDa protein 2 [Musa acuminata subsp. malaccensis]
gene26378	2.4939e-09	#NAME?	hypothetical protein PRUPE_ppa011207mg [Prunus persica]
Walnut_newGene_5444	2.71246e-08	2.88606	PREDICTED: alpha/beta hydrolase domain-containing protein 17B isoform X1 [Prunus mume]
gene6210	1.37884e-15	-3.96626	hypothetical protein ZEAMMB73_313798 [Zea mays]
gene2788	3.42139e-13	-7.764	PREDICTED: TMV resistance protein N-like [Prunus mume]
gene31864	5.56618e-36	-4.14039	unnamed protein product [Vitis vinifera]
gene41001	2.73424e-12	-7.55579	Pyrophosphate--fructose 6-phosphate 1-phosphotransferase subunit beta isoform 1 [Theobroma cacao]
gene17139	6.41293e-08	4.52765	GRAM domain family protein [Theobroma cacao]
gene20213	4.14086e-09	#NAME?	PREDICTED: fatty acid amide hydrolase-like isoform X7 [Cucumis melo]
gene4360	7.15086e-06	-3.76781	hypothetical protein PRUPE_ppa000240mg [Prunus persica]
gene10816	3.25612e-07	-2.44829	CUGBP Elav-like family member 5 [Morus notabilis]
gene37616	6.66303e-103	#NAME?	hypothetical protein PRUPE_ppa013862mg [Prunus persica]
gene22128	8.37595e-08	Inf	hypothetical protein CISIN_1g036938mg [Citrus sinensis]
gene1605	0.000252726	-2.29256	Dynein light chain LC6, flagellar outer arm [Morus notabilis]
gene34817	1.55741e-41	2.93959	UDP-glucosyl transferase 85A2 [Theobroma cacao]
gene29628	1.35969e-07	-4.0046	PREDICTED: uncharacterized protein LOC104908799 isoform X1 [Beta vulgaris subsp. vulgaris]
Walnut_newGene_246	0.000115057	-5.67856	Uncharacterized protein TCM_020114 [Theobroma cacao]
gene31460	6.79007e-09	-2.53587	PREDICTED: protein RADIALIS-like 3 [Pyrus x bretschneideri]
gene24698	4.55507e-15	#NAME?	hypothetical protein PHAVU_003G143700g [Phaseolus vulgaris]
gene42097	9.31234e-06	2.80526	PREDICTED: F-box protein At2g27310-like [Pyrus x bretschneideri]
gene5967	2.68478e-13	-2.57078	PREDICTED: probable carboxylesterase 5-like [Citrus sinensis]
gene29279	1.33581e-16	-5.40793	PREDICTED: probable carbohydrate esterase At4g34215-like isoform X1 [Glycine max]
gene35851	8.53066e-14	-2.06462	PREDICTED: GATA transcription factor 5-like [Prunus mume]
gene24234	0.000464487	-2.93357	geranyl diphosphate synthase large subunit [Humulus lupulus]
gene14901	1.83225e-34	6.6869	hypothetical protein L484_005402 [Morus notabilis]
gene30535	2.15096e-10	-6.64266	RING/U-box superfamily protein [Theobroma cacao]
gene4652	5.96271e-31	-2.6019	GAST-like gene product family protein [Populus trichocarpa]
gene5094	4.63626e-07	-2.34429	hypothetical protein CICLE_v10020278mg [Citrus clementina]
gene34893	2.3715e-06	#NAME?	hypothetical protein CISIN_1g039047mg [Citrus sinensis]
gene11772	1.16733e-168	4.18237	PREDICTED: pleiotropic drug resistance protein 2-like [Vitis vinifera]
gene9102	4.68799e-298	6.50381	hypothetical protein PRUPE_ppa026475mg [Prunus persica]
gene26282	7.51916e-18	-4.70631	PREDICTED: reticuline oxidase-like protein-like [Citrus sinensis]
gene32946	2.28214e-62	-3.95293	Uncharacterized protein TCM_008923 [Theobroma cacao]
gene19630	3.42434e-28	#NAME?	PREDICTED: LYR motif-containing protein 4 [Nelumbo nucifera]
gene16166	5.73463e-10	2.6327	PREDICTED: probable leucine-rich repeat receptor-like serine/threonine-protein kinase At3g14840 [Prunus mume]
gene6629	5.22008e-34	-2.54756	PREDICTED: transcription factor bHLH35-like [Pyrus x bretschneideri]
gene4927	6.3947e-17	-2.51655	PREDICTED: uncharacterized protein LOC103320396 [Prunus mume]
gene30856	1.03436e-08	-2.40919	PREDICTED: type I inositol 1,4,5-trisphosphate 5-phosphatase CVP2 isoform X2 [Vitis vinifera]
gene3850	1.01639e-57	4.60856	Glutamate decarboxylase 4 isoform 1 [Theobroma cacao]
gene12089	1.45138e-05	-4.28392	hypothetical protein CICLE_v10026070mg [Citrus clementina]
gene20767	4.21067e-28	8.70631	PREDICTED: lysM domain-containing GPI-anchored protein 2 [Vitis vinifera]
gene602	4.49831e-06	-3.55882	PREDICTED: gibberellin 2-beta-dioxygenase 8 [Populus euphratica]
gene11035	2.55924e-05	3.42872	PREDICTED: serine acetyltransferase 1, chloroplastic-like [Vitis vinifera]
gene3523	0.000473621	-3.18495	PREDICTED: putative beta-glucosidase 41 [Vitis vinifera]
gene22562	1.7386e-44	4.36912	PREDICTED: pathogenesis-related protein 1-like [Tarenaya hassleriana]
gene15793	1.14112e-83	2.65259	PREDICTED: GDSL esterase/lipase At4g10955-like [Nicotiana sylvestris]
gene16547	6.74035e-12	-4.60439	conserved hypothetical protein [Ricinus communis]
gene4274	2.35861e-16	-3.37066	PREDICTED: protein trichome birefringence-like 42 [Prunus mume]
gene11166	4.51511e-18	2.25364	Kinase superfamily protein, putative [Theobroma cacao]
gene8637	1.18589e-85	2.88722	monoxygenase, putative [Ricinus communis]
gene4527	8.22112e-154	-7.24239	FASCICLIN-like arabinogalactan 2 [Theobroma cacao]
gene5227	3.33077e-69	-9.10295	PREDICTED: DNA-damage-repair/toleration protein DRT100-like [Eucalyptus grandis]
gene22052	1.89497e-47	-2.74698	PREDICTED: probable leucine-rich repeat receptor-like serine/threonine-protein kinase At3g14840 [Prunus mume]
gene20276	6.58648e-10	-6.50647	Folic acid and derivative biosynthetic process [Theobroma cacao]
gene42699	8.90083e-111	-7.04618	hypothetical protein L484_011056 [Morus notabilis]
gene33749	5.47863e-09	-5.03224	PREDICTED: serine carboxypeptidase-like 48-like isoform X1 [Citrus sinensis]
gene1235	2.25748e-28	-2.38262	PREDICTED: uncharacterized protein LOC100247499 [Vitis vinifera]
gene35831	2.51433e-101	-3.09837	Kinesin-related protein 4 [Morus notabilis]
gene25255	0.000182915	-2.2607	hypothetical protein POPTR_0005s05250g [Populus trichocarpa]
gene18740	2.00806e-06	4.01831	hypothetical protein CISIN_1g003514mg [Citrus sinensis]
gene31682	1.01641e-22	-4.86884	Uncharacterized protein TCM_034063 [Theobroma cacao]
Walnut_newGene_4336	1.80782e-11	4.78926	PREDICTED: secoisolariciresinol dehydrogenase-like [Vitis vinifera]
gene27043	1.04954e-25	-4.08666	Lactoylglutathione lyase / glyoxalase I family protein [Theobroma cacao]
gene19156	9.91134e-24	-8.44054	PREDICTED: O-acyltransferase WSD1-like isoform X4 [Populus euphratica]
gene32346	7.22449e-15	-4.27946	hypothetical protein POPTR_0004s08700g [Populus trichocarpa]
gene3237	6.60865e-19	#NAME?	PREDICTED: uncharacterized protein At1g28695-like [Fragaria vesca subsp. vesca]
gene36245	1.80704e-133	3.51821	PREDICTED: LOW QUALITY PROTEIN: subtilisin-like protease SBT3.5 [Vitis vinifera]
gene14457	3.04776e-05	-4.64817	hypothetical protein CICLE_v10025259mg [Citrus clementina]
gene33302	1.55186e-09	2.70385	PREDICTED: L-type lectin-domain containing receptor kinase IV.1 [Vitis vinifera]
gene35675	1.10754e-85	-3.60044	PREDICTED: cytochrome P450 90A1 [Prunus mume]
gene34001	3.7804e-69	-8.15198	Uncharacterized protein TCM_011920 [Theobroma cacao]
gene3807	8.78275e-06	#NAME?	PREDICTED: uncharacterized protein LOC103324446 [Prunus mume]
gene5422	3.24639e-10	#NAME?	PREDICTED: probable LRR receptor-like serine/threonine-protein kinase At1g56130 [Prunus mume]
gene13861	2.03607e-19	3.01432	PREDICTED: LRR receptor-like serine/threonine-protein kinase GSO1 [Vitis vinifera]
gene23906	3.3145e-09	3.25083	RING/U-box superfamily protein, putative [Theobroma cacao]
gene32332	7.55913e-27	5.97115	PREDICTED: probable ADP-ribosylation factor GTPase-activating protein AGD11 [Prunus mume]
gene13843	6.05444e-23	2.67224	shikimate dehydrogenase, putative [Ricinus communis]
gene39824	6.9164e-83	2.64237	PREDICTED: LOB domain-containing protein 38-like [Malus domestica]
gene38083	1.28309e-08	5.3527	PREDICTED: putative uncharacterized protein YGR160W [Prunus mume]
gene25359	3.16914e-08	-3.02798	hypothetical protein JCGZ_02580 [Jatropha curcas]
gene39976	2.8636e-15	-2.22436	NAC domain-containing protein [Boehmeria nivea]
Walnut_newGene_3557	1.04322e-21	Inf	Uncharacterized protein isoform 2 [Theobroma cacao]
gene31241	5.30319e-12	-7.03201	PREDICTED: auxin-induced protein X10A-like [Citrus sinensis]
gene26200	4.11966e-40	7.79523	GDSL esterase/lipase [Morus notabilis]
gene29760	1.32952e-235	-5.73331	PREDICTED: thaumatin-like protein 1b [Malus domestica]
gene31245	6.40317e-16	-7.67977	hypothetical protein PHAVU_009G001600g [Phaseolus vulgaris]
gene42036	2.27853e-05	-3.7551	hypothetical protein PRUPE_ppa025303mg, partial [Prunus persica]
gene1895	8.46943e-29	3.56542	unnamed protein product [Vitis vinifera]
gene27458	1.76359e-19	2.53776	PREDICTED: cytochrome P450 87A3-like [Prunus mume]
gene30329	4.77089e-08	-5.23231	hypothetical protein PRUPE_ppa007377mg [Prunus persica]
gene42121	3.87991e-09	Inf	PREDICTED: protein ROOT PRIMORDIUM DEFECTIVE 1-like [Citrus sinensis]
gene9970	2.44053e-64	-11.6877	PREDICTED: short-chain dehydrogenase TIC 32, chloroplastic-like [Fragaria vesca subsp. vesca]
gene33911	2.31586e-12	-6.57907	hypothetical protein PRUPE_ppa019257mg [Prunus persica]
gene18115	8.0876e-06	2.32871	Transcription factor-like protein DPB [Morus notabilis]
gene33499	4.28059e-30	-7.00984	PREDICTED: sulfate transporter 3.1-like [Prunus mume]
gene10965	1.24925e-07	-2.56329	phosphofructokinase [Hevea brasiliensis]
Walnut_newGene_4293	2.1384e-07	2.10123	hypothetical protein glysoja_025159 [Glycine soja]
gene2015	5.0274e-53	3.66437	PREDICTED: probable LRR receptor-like serine/threonine-protein kinase At4g08850 [Prunus mume]
gene8860	2.69612e-152	7.5133	NB-ARC domain-containing disease resistance protein, putative [Theobroma cacao]
gene1410	5.48561e-15	5.09967	alpha amylase/subtilisin inhibitor, partial [Fagus sylvatica]
gene38522	5.46482e-05	-2.7038	PREDICTED: S-adenosylmethionine decarboxylase proenzyme 4 [Vitis vinifera]
gene15845	6.54431e-59	2.61436	PREDICTED: uncharacterized protein LOC100261790 [Vitis vinifera]
gene26720	1.00599e-65	2.56386	putative cadmium-transporting ATPase [Gossypium arboreum]
gene18958	1.08768e-08	#NAME?	4-coumarate:coenzyme A ligase 4 [Fraxinus mandshurica]
gene6399	2.05061e-10	-4.60889	Pmr5/Cas1p GDSL/SGNH-like acyl-esterase family protein [Medicago truncatula]
gene14282	1.14887e-20	-5.75356	PREDICTED: cysteine-rich receptor-like protein kinase 10 [Vitis vinifera]
gene20714	3.65465e-55	#NAME?	Secretory carrier 3 isoform 2 [Theobroma cacao]
gene3415	2.30012e-06	-2.86333	GDSL-like Lipase/Acylhydrolase superfamily protein [Theobroma cacao]
gene4994	4.67179e-34	2.31587	chalcone synthase [Litchi chinensis]
gene33916	3.85684e-08	-6.24602	microsomal omega-3 fatty acid desaturase [Betula pendula]
gene5599	0.000107521	-2.59091	unnamed protein product [Vitis vinifera]
gene27126	5.83746e-144	-11.1523	PREDICTED: cytochrome P450 71B34-like isoform 3 [Fragaria vesca subsp. vesca]
Walnut_newGene_5568	2.59775e-05	-3.91814	unnamed protein product [Vitis vinifera]
Walnut_newGene_2902	1.80084e-05	#NAME?	hypothetical protein EUGRSUZ_I02369 [Eucalyptus grandis]
gene42852	4.69476e-09	4.04811	unknown [Populus trichocarpa]
gene28108	3.06474e-18	4.73919	Amino acid permease 3 -like protein [Gossypium arboreum]
gene11296	8.7537e-31	6.33944	PREDICTED: monothiol glutaredoxin-S6-like [Fragaria vesca subsp. vesca]
gene27091	6.24507e-30	-2.97017	PREDICTED: extra-large guanine nucleotide-binding protein 1-like [Pyrus x bretschneideri]
gene10381	2.23867e-46	2.57112	hypothetical protein PRUPE_ppa010217mg [Prunus persica]
gene20523	1.0291e-07	-5.04126	Uncharacterized protein isoform 1 [Theobroma cacao]
gene32845	1.99867e-09	-2.60137	homeobox protein, putative [Ricinus communis]
gene39111	8.96983e-07	-2.5712	PREDICTED: synaptotagmin-5-like [Cucumis sativus]
gene4631	7.79238e-06	3.20486	uncharacterized LOC103453287 [Malus domestica]
Walnut_newGene_2855	0.000689987	-2.25772	Leucine-rich repeat transmembrane protein kinase, putative [Theobroma cacao]
gene10003	7.28254e-26	-4.26827	hypothetical protein PRUPE_ppa001525mg [Prunus persica]
gene17623	1.68794e-12	Inf	conserved hypothetical protein [Ricinus communis]
gene33322	6.96402e-37	3.34638	NB-ARC domain-containing disease resistance protein, putative [Theobroma cacao]
gene28847	3.74867e-16	2.54647	WRKY family transcription factor [Theobroma cacao]
Walnut_newGene_4994	1.9292e-61	-9.91361	PREDICTED: EG45-like domain containing protein [Prunus mume]
gene36831	2.02355e-13	-3.16187	Amino acid permease 6 [Theobroma cacao]
gene35813	4.28061e-22	-3.31313	PREDICTED: putative cyclin-D6-1 [Populus euphratica]
gene33908	7.53906e-08	-3.30294	PREDICTED: protein PMR5-like [Populus euphratica]
gene21214	1.68102e-06	-3.89623	hypothetical protein JCGZ_21368 [Jatropha curcas]
gene39005	1.90563e-13	-5.65775	DNA-3-methyladenine glycosylase, putative [Theobroma cacao]
gene11711	3.25886e-09	#NAME?	PREDICTED: NAC domain-containing protein 7 [Vitis vinifera]
gene24689	0.000816492	2.40834	PREDICTED: uncharacterized protein LOC103486561 [Cucumis melo]
gene36144	3.73126e-80	3.68562	PREDICTED: nucleobase-ascorbate transporter 3-like isoform X1 [Citrus sinensis]
gene33621	3.80527e-11	-6.83957	nucleic acid binding protein, putative [Ricinus communis]
gene25879	3.48208e-14	-5.14732	hypothetical protein POPTR_0008s01490g [Populus trichocarpa]
gene34222	3.48949e-06	-3.21746	PREDICTED: uncharacterized protein LOC103325111 [Prunus mume]
gene2554	8.96217e-08	-6.88968	Eukaryotic aspartyl protease family protein [Theobroma cacao]
gene1924	1.79081e-06	-2.60492	hypothetical protein JCGZ_02935 [Jatropha curcas]
gene32121	2.09234e-09	-2.96876	PREDICTED: uncharacterized protein LOC103330074 [Prunus mume]
gene40304	0.000182515	#NAME?	PREDICTED: 3&apos;-N-debenzoyl-2&apos;-deoxytaxol N-benzoyltransferase-like [Vitis vinifera]
gene5079	1.96813e-05	-2.80465	Uncharacterized protein isoform 1 [Theobroma cacao]
Walnut_newGene_7233	1.60708e-06	-3.90103	hypothetical protein PRUPE_ppa026368mg, partial [Prunus persica]
gene13120	1.76462e-06	-2.5729	PREDICTED: serine/threonine-protein kinase SAPK10 isoform X2 [Vitis vinifera]
gene19489	8.91216e-10	-5.00591	glycine-rich family protein [Populus trichocarpa]
gene4236	3.17159e-55	-8.30847	hypothetical protein PRUPE_ppa016580mg [Prunus persica]
gene40362	5.05697e-12	#NAME?	PREDICTED: uncharacterized protein LOC100254717 [Vitis vinifera]
gene1431	1.32312e-34	2.06439	Leucine-rich repeat transmembrane protein kinase [Theobroma cacao]
gene42601	1.31627e-20	-2.78331	Vesicle-associated protein 4-2 [Theobroma cacao]
gene15658	3.19379e-19	-4.81217	conserved hypothetical protein [Ricinus communis]
gene5201	1.70554e-53	2.27899	hypothetical protein CICLE_v10030476mg [Citrus clementina]
gene1507	4.17309e-47	2.00654	hypothetical protein POPTR_0011s11570g [Populus trichocarpa]
gene29100	1.65467e-21	-4.26043	PREDICTED: beta-amylase 1, chloroplastic [Eucalyptus grandis]
gene27087	1.0409e-07	2.78682	PREDICTED: RING-H2 finger protein ATL65-like [Glycine max]
Walnut_newGene_682	2.50933e-06	2.95304	--
gene35890	1.29626e-55	-3.22882	hypothetical protein L484_017629 [Morus notabilis]
gene37110	4.14964e-85	-6.77157	PREDICTED: uncharacterized protein LOC103446809 [Malus domestica]
gene15806	4.83963e-05	-5.23392	hypothetical protein F383_19007 [Gossypium arboreum]
gene15064	7.73511e-22	6.21488	PREDICTED: uncharacterized protein LOC100244219 [Vitis vinifera]
gene39034	3.70682e-12	3.03637	hypothetical protein CISIN_1g0195841mg, partial [Citrus sinensis]
gene13517	9.40131e-10	6.47017	hypothetical protein PRUPE_ppa008527mg [Prunus persica]
gene16643	9.79595e-51	-3.17623	hypothetical protein PRUPE_ppa002559mg [Prunus persica]
gene1092	2.7213e-06	2.16606	hypothetical protein JCGZ_04678 [Jatropha curcas]
gene15638	4.78695e-13	-4.24536	PREDICTED: uncharacterized protein LOC100256691 [Vitis vinifera]
gene33336	3.12101e-07	-2.73565	PREDICTED: cyclic pyranopterin monophosphate synthase accessory protein, mitochondrial-like isoform X1 [Citrus sinensis]
gene3258	1.685e-46	-3.14592	conserved hypothetical protein [Ricinus communis]
gene8599	2.05224e-26	-4.20853	Cytokinin oxidase/dehydrogenase 1 isoform 1 [Theobroma cacao]
gene6190	3.49908e-22	-2.62439	PREDICTED: protein IQ-DOMAIN 31-like [Vitis vinifera]
gene13139	8.24322e-179	5.12956	PREDICTED: cytochrome P450 82A3-like [Prunus mume]
gene31180	6.93271e-54	-3.44489	PREDICTED: 21 kDa protein [Pyrus x bretschneideri]
gene15984	3.93957e-05	-2.83539	hypothetical protein CICLE_v10003704mg, partial [Citrus clementina]
Walnut_newGene_5182	4.32611e-116	7.28876	PREDICTED: uncharacterized protein LOC103699285 [Phoenix dactylifera]
gene30219	1.93537e-09	#NAME?	PREDICTED: probable lactoylglutathione lyase, chloroplast [Nelumbo nucifera]
Walnut_newGene_5555	3.51614e-06	3.38286	Peptidyl-prolyl cis-trans isomerase 1 [Morus notabilis]
Walnut_newGene_3739	5.12902e-06	3.32805	Vacuolar cation/proton exchanger 3 [Morus notabilis]
gene15089	4.8346e-05	-4.17641	PREDICTED: probable pectate lyase 18-like [Fragaria vesca subsp. vesca]
gene29959	7.8712e-10	#NAME?	PREDICTED: wall-associated receptor kinase-like 22 [Prunus mume]
gene35956	1.06748e-27	-8.82708	hypothetical protein PRUPE_ppa007054mg [Prunus persica]
Walnut_newGene_4537	4.15777e-09	#NAME?	PREDICTED: putative gamma-glutamylcyclotransferase At3g02910 [Prunus mume]
gene35865	1.42924e-58	-6.86043	PREDICTED: beta-galactosidase 3 [Prunus mume]
gene31046	1.86038e-07	-2.64539	hypothetical protein PRUPE_ppa004332mg [Prunus persica]
Walnut_newGene_210	4.96737e-07	-3.7564	hypothetical protein CICLE_v10030722mg [Citrus clementina]
gene11410	5.48203e-17	#NAME?	PREDICTED: uncharacterized protein LOC105125744 [Populus euphratica]
gene24504	1.51308e-28	2.098	hypothetical protein JCGZ_23456 [Jatropha curcas]
gene30938	6.80585e-70	-4.20861	NC domain-containing family protein [Populus trichocarpa]
gene16569	1.52718e-40	2.07263	hypothetical protein CISIN_1g009828mg [Citrus sinensis]
gene42549	6.16054e-48	-4.77021	hypothetical protein PRUPE_ppa002367mg [Prunus persica]
gene31134	4.99008e-44	5.85381	PREDICTED: uncharacterized protein LOC104881667 [Vitis vinifera]
gene35300	6.53906e-21	-3.72495	hypothetical protein JCGZ_14009 [Jatropha curcas]
gene30664	6.28669e-39	#NAME?	PREDICTED: non-specific lipid-transfer protein 3-like [Pyrus x bretschneideri]
Walnut_newGene_1099	4.16182e-07	-4.0958	Uncharacterized protein TCM_028732 [Theobroma cacao]
gene21386	2.83021e-99	4.00493	Bet v 1 allergen [Quercus suber]
gene22003	6.24563e-50	Inf	PREDICTED: rhodanese-like domain-containing protein 8, chloroplastic isoform X2 [Vitis vinifera]
gene9160	2.82259e-22	-4.0765	PREDICTED: uncharacterized protein LOC103930816 [Pyrus x bretschneideri]
gene20018	4.13977e-09	#NAME?	cytochrome P450 monooxygenase CYP71D54 [Glycine max]
gene32150	9.84278e-28	-3.98467	hypothetical protein PRUPE_ppa007817mg [Prunus persica]
gene30309	1.27681e-230	5.14721	hypothetical protein PRUPE_ppa002071mg [Prunus persica]
gene41417	4.5722e-05	-3.15767	AP2/B3-like transcriptional factor family protein, putative [Theobroma cacao]
gene33991	5.356e-13	-2.61304	hypothetical protein CISIN_1g006747mg [Citrus sinensis]
gene16049	3.09679e-51	6.80945	Heavy metal transport/detoxification superfamily protein, putative [Theobroma cacao]
gene35774	3.42384e-36	-2.78274	Probably inactive leucine-rich repeat receptor-like protein kinase [Morus notabilis]
gene27749	0.000534916	-2.51929	PREDICTED: uncharacterized protein LOC103443619 isoform X1 [Malus domestica]
gene17520	3.9785e-21	-8.77736	PREDICTED: cucumisin-like [Vitis vinifera]
gene4751	1.06554e-05	-4.71935	PREDICTED: protein GLUTAMINE DUMPER 3 [Malus domestica]
Walnut_newGene_382	1.83309e-60	#NAME?	PREDICTED: probable disease resistance protein At4g27220 [Populus euphratica]
gene29710	4.40693e-05	-3.9841	hypothetical protein L484_002759 [Morus notabilis]
gene23034	0	-13.4026	E3 ubiquitin-protein ligase UPL2 isoform 1 [Theobroma cacao]
gene17137	4.8262e-19	-3.82955	18.2 kDa class I heat shock protein [Medicago truncatula]
gene8686	5.012e-92	3.44357	PREDICTED: pleiotropic drug resistance protein 2-like [Eucalyptus grandis]
gene39854	6.24908e-114	3.18654	Indole-3-acetic acid-amido synthetase GH3.5, putative isoform 1 [Theobroma cacao]
gene8739	4.41633e-20	-5.11094	PREDICTED: proline-rich receptor-like protein kinase PERK1 [Nelumbo nucifera]
gene36314	3.23538e-11	-3.69466	PREDICTED: protein TRANSPARENT TESTA 12-like [Populus euphratica]
gene29649	6.81122e-52	-3.33298	hypothetical protein CICLE_v10026552mg [Citrus clementina]
gene37530	1.48081e-11	2.58582	PREDICTED: DDB1- and CUL4-associated factor 4-like [Fragaria vesca subsp. vesca]
gene6363	4.91962e-89	-11.5763	hypothetical protein L484_008499 [Morus notabilis]
gene15789	2.63403e-08	#NAME?	PREDICTED: probable receptor-like serine/threonine-protein kinase At5g57670 [Eucalyptus grandis]
gene39023	3.06813e-37	3.18714	PREDICTED: cytochrome P450 734A1-like [Citrus sinensis]
gene4429	7.95795e-09	-3.93183	PREDICTED: exocyst complex component EXO70A1 [Nelumbo nucifera]
gene8671	1.85427e-18	-7.97749	Zinc finger family protein / RNA recognition motif-containing protein, putative [Theobroma cacao]
gene14775	8.37266e-26	-5.36821	PREDICTED: glutamate decarboxylase-like [Glycine max]
gene37383	1.10151e-32	-10.0263	PREDICTED: uncharacterized protein LOC100251279 [Vitis vinifera]
gene29301	7.00544e-226	-10.382	Nucleotide-diphospho-sugar transferases superfamily protein isoform 1 [Theobroma cacao]
gene24458	4.71817e-68	Inf	PREDICTED: TMV resistance protein N-like [Pyrus x bretschneideri]
gene30062	1.15267e-60	#NAME?	hypothetical protein PRUPE_ppa003489mg [Prunus persica]
gene30942	1.14648e-36	-2.12816	PREDICTED: calcium-transporting ATPase, endoplasmic reticulum-type [Populus euphratica]
gene21370	6.76564e-26	5.91338	hypothetical protein JCGZ_15984 [Jatropha curcas]
gene31030	7.18931e-06	#NAME?	PREDICTED: probable pectate lyase 18 isoform 1 [Glycine max]
Walnut_newGene_2361	1.0555e-48	Inf	PREDICTED: proline-rich receptor-like protein kinase PERK1 [Prunus mume]
gene34047	7.66198e-07	-3.8507	PREDICTED: auxin response factor 4 [Vitis vinifera]
gene27714	2.07556e-08	-4.01017	PREDICTED: actin-related protein 2/3 complex subunit 2B isoform X1 [Vitis vinifera]
gene32113	6.4383e-39	-4.11736	PREDICTED: uncharacterized protein At3g49720-like [Vitis vinifera]
gene40035	6.0762e-102	-3.51821	hypothetical protein PRUPE_ppa003399mg [Prunus persica]
gene1809	4.9228e-09	2.01643	Uncharacterized protein TCM_005685 [Theobroma cacao]
gene26496	2.28315e-13	5.61272	PREDICTED: protein PHLOEM PROTEIN 2-LIKE A6-like [Solanum tuberosum]
gene7844	8.02588e-63	-2.44024	hypothetical protein JCGZ_21547 [Jatropha curcas]
gene37997	3.33251e-19	-4.17722	Uncharacterized protein isoform 1 [Theobroma cacao]
Walnut_newGene_5413	5.81915e-29	-4.36274	hypothetical protein PRUPE_ppa022667mg, partial [Prunus persica]
gene3296	1.0239e-07	-5.03897	squamosa promoter binding protein-like 8 [Betula platyphylla]
gene24281	1.21205e-05	-5.01074	PREDICTED: GTP-binding protein SAR1A-like [Citrus sinensis]
gene12377	2.24152e-05	-2.57813	PREDICTED: serine/threonine-protein kinase Aurora-1 [Vitis vinifera]
gene5737	1.13646e-10	2.66767	PREDICTED: cellulose synthase-like protein G3 [Vitis vinifera]
gene38346	1.23334e-05	-3.31765	PREDICTED: Fanconi anemia group I protein [Prunus mume]
gene29370	5.34238e-12	-3.05974	PREDICTED: RNA polymerase sigma factor sigF, chloroplastic isoform X2 [Populus euphratica]
gene22429	9.33522e-13	-5.31404	PREDICTED: protein IQ-DOMAIN 1 [Prunus mume]
gene14428	0.000537741	-2.34966	PREDICTED: brassinosteroid-regulated protein BRU1-like [Pyrus x bretschneideri]
gene12398	2.6044e-15	-2.84649	Probably inactive leucine-rich repeat receptor-like protein kinase [Theobroma cacao]
gene26209	3.91392e-14	2.43538	PREDICTED: uncharacterized protein LOC100259118 [Vitis vinifera]
gene18970	1.15906e-10	-6.71437	PREDICTED: KRR1 small subunit processome component homolog [Malus domestica]
gene11707	1.91365e-11	-4.27851	PREDICTED: acid beta-fructofuranosidase-like [Pyrus x bretschneideri]
gene1374	5.51802e-18	-2.1412	PREDICTED: xyloglucan galactosyltransferase KATAMARI1 homolog [Vitis vinifera]
Walnut_newGene_4765	5.64304e-25	Inf	PREDICTED: zinc finger BED domain-containing protein RICESLEEPER 2-like [Nicotiana sylvestris]
gene14351	3.40958e-19	-3.90996	hypothetical protein CISIN_1g015407mg [Citrus sinensis]
gene25334	5.17329e-13	-7.22362	PREDICTED: putative alpha-xylosidase 2 [Prunus mume]
gene30070	2.13784e-64	-4.05464	PREDICTED: galactomannan galactosyltransferase 1-like [Cucumis sativus]
gene29306	7.36873e-26	-3.89595	hypothetical protein PRUPE_ppa002357mg [Prunus persica]
gene10049	0.000127095	-2.91974	PREDICTED: uncharacterized protein LOC101204590 [Cucumis sativus]
gene34727	1.35866e-16	#NAME?	Auxin-responsive GH3 family protein [Theobroma cacao]
gene21603	2.68297e-06	-4.80823	PREDICTED: uncharacterized protein At5g41620 isoform X1 [Vitis vinifera]
gene20843	1.22609e-27	-6.18708	Nucleobase-ascorbate transporter 6 -like protein [Gossypium arboreum]
gene1314	3.69981e-15	-3.74296	hypothetical protein PRUPE_ppa001194mg [Prunus persica]
gene10872	7.38179e-14	#NAME?	PREDICTED: germin-like protein subfamily 2 member 4 [Prunus mume]
gene41521	9.44622e-07	4.33161	PREDICTED: 26.5 kDa heat shock protein, mitochondrial [Pyrus x bretschneideri]
gene42568	5.80316e-07	#NAME?	Transcription factor [Theobroma cacao]
gene5007	3.62117e-41	2.47411	unknown [Lotus japonicus]
gene33960	1.3025e-17	5.48201	PREDICTED: protein LURP-one-related 15-like [Glycine max]
gene25440	2.00035e-16	#NAME?	hypothetical protein PRUPE_ppa011153mg [Prunus persica]
gene2510	8.95927e-08	2.66698	PREDICTED: receptor-like protein 12 isoform X1 [Vitis vinifera]
gene9190	4.80456e-09	#NAME?	PREDICTED: uncharacterized protein LOC103416799 [Malus domestica]
gene36733	2.0873e-166	5.03356	aldo-keto reductase, putative [Ricinus communis]
gene566	1.59014e-43	-2.74306	hypothetical protein JCGZ_22422 [Jatropha curcas]
gene34546	3.8314e-07	-2.49648	hypothetical protein CICLE_v10015729mg [Citrus clementina]
gene7160	0.000606104	-2.21383	PREDICTED: UDP-glycosyltransferase 74E2-like isoform X1 [Citrus sinensis]
gene18167	4.01358e-12	Inf	transferase, transferring glycosyl groups, putative [Ricinus communis]
gene8944	3.04433e-54	-2.26727	PREDICTED: protein ASPARTIC PROTEASE IN GUARD CELL 1 [Malus domestica]
Walnut_newGene_7137	8.89734e-10	#NAME?	hypothetical protein PHAVU_005G184000g [Phaseolus vulgaris]
gene34154	1.56755e-34	2.62985	PREDICTED: calcium-dependent protein kinase 10 [Prunus mume]
gene2606	1.6324e-07	-9.49338	PREDICTED: cyclic nucleotide-gated ion channel 1-like [Malus domestica]
gene37450	3.21006e-52	2.81152	acyl-activating enzyme 2 [Cannabis sativa]
gene28322	1.64033e-109	3.52962	ATP binding cassette subfamily B4 isoform 1 [Theobroma cacao]
gene16339	8.94999e-43	#NAME?	Laminin subunit beta-1 [Gossypium arboreum]
gene36234	4.09274e-06	-3.29603	PREDICTED: uncharacterized protein LOC103331178 isoform X1 [Prunus mume]
gene26721	5.18892e-69	-7.06786	hypothetical protein PHAVU_001G1941000g, partial [Phaseolus vulgaris]
gene2345	1.80637e-12	-2.62194	PREDICTED: calmodulin-like protein 3 [Populus euphratica]
gene1155	1.38023e-18	2.18492	RING/U-box superfamily protein, putative [Theobroma cacao]
gene27638	8.34223e-16	-6.28304	Uncharacterized protein TCM_000598 [Theobroma cacao]
gene9380	1.12366e-14	-4.31672	Pre-mRNA cleavage complex 2 protein Pcf11, putative isoform 2 [Theobroma cacao]
gene15778	3.5437e-23	4.03276	conserved hypothetical protein [Ricinus communis]
gene16168	2.63554e-43	2.01514	putative xyloglucan endotransglucosylase/hydrolase protein 30 [Morus notabilis]
gene2941	1.0726e-07	-4.14503	Integrase-type DNA-binding superfamily protein [Theobroma cacao]
gene16972	1.25174e-06	-3.38701	PREDICTED: uncharacterized protein LOC103953394 [Pyrus x bretschneideri]
gene3936	8.45002e-07	2.40671	LOB domain-containing protein 41, putative [Theobroma cacao]
gene5991	1.32823e-75	-9.22221	PREDICTED: TMV resistance protein N-like isoform X1 [Malus domestica]
gene35797	1.63332e-12	2.39197	PREDICTED: G-type lectin S-receptor-like serine/threonine-protein kinase At4g03230 [Malus domestica]
gene29351	2.19773e-17	-2.328	hypothetical protein POPTR_0006s25880g [Populus trichocarpa]
gene8329	1.84228e-07	#NAME?	hypothetical protein PRUPE_ppa013543mg [Prunus persica]
gene26077	1.26991e-06	-4.04074	PREDICTED: wall-associated receptor kinase 2-like [Vitis vinifera]
gene12277	0.00056241	-2.93779	125 kDa kinesin-related protein isoform 1 [Theobroma cacao]
gene41617	8.24765e-09	-4.18097	PREDICTED: protein YLS7-like [Glycine max]
gene32793	4.18881e-14	2.50972	amino acid transporter, putative [Ricinus communis]
gene9017	4.3388e-48	-3.64578	PREDICTED: UDP-glycosyltransferase 73C1-like [Citrus sinensis]
gene25843	4.72225e-187	#NAME?	PREDICTED: cytochrome P450 CYP736A12-like [Prunus mume]
gene39745	8.02698e-10	-3.65831	PREDICTED: pleiotropic drug resistance protein 3-like [Elaeis guineensis]
gene7703	5.25761e-83	4.68275	RecName: Full=Beta-amyrin synthase [Betula platyphylla]
gene35348	3.99753e-24	2.0138	PREDICTED: serine/threonine-protein kinase ATM isoform X2 [Vitis vinifera]
gene28060	1.34036e-23	-3.23621	PREDICTED: uncharacterized protein LOC103326844 [Prunus mume]
Walnut_newGene_2472	7.2643e-05	-2.47905	hypothetical protein VITISV_025180 [Vitis vinifera]
gene16546	4.40071e-24	-3.59028	PREDICTED: uncharacterized protein LOC103957887 [Pyrus x bretschneideri]
gene29656	1.05096e-73	3.08806	PREDICTED: adipocyte plasma membrane-associated protein-like [Fragaria vesca subsp. vesca]
gene25830	3.91192e-92	-2.81103	PREDICTED: early nodulin-like protein 2 [Prunus mume]
gene8451	3.38095e-09	-2.73796	PREDICTED: perakine reductase [Vitis vinifera]
gene2311	2.75133e-07	3.01192	PREDICTED: microtubule-associated protein futsch-like [Prunus mume]
gene35392	1.16377e-12	-2.22133	PREDICTED: somatic embryogenesis receptor kinase 2 [Prunus mume]
gene40518	0.000524985	#NAME?	RecName: Full=Myrcene synthase, chloroplastic; Flags: Precursor [Quercus ilex]
gene18954	1.26099e-118	4.93089	PREDICTED: uncharacterized protein At5g02240 [Cucumis melo]
gene42129	6.9116e-13	-4.41267	hypothetical protein JCGZ_03792 [Jatropha curcas]
Walnut_newGene_898	1.05824e-73	#NAME?	PREDICTED: linoleate 13S-lipoxygenase 2-1, chloroplastic-like isoform X2 [Malus domestica]
gene25100	7.63035e-50	-4.98713	PREDICTED: uncharacterized protein LOC100251727 [Vitis vinifera]
gene10877	9.75538e-145	-3.76289	PREDICTED: protein notum homolog [Nelumbo nucifera]
gene2072	2.05947e-30	-6.32192	hypothetical protein PRUPE_ppa007233mg [Prunus persica]
gene22792	2.08042e-29	#NAME?	Uncharacterized protein TCM_020072 [Theobroma cacao]
gene42364	3.95465e-21	-4.33473	16.6 kDa heat shock protein [Glycine soja]
gene29364	3.06348e-160	#NAME?	hypothetical protein JCGZ_25104 [Jatropha curcas]
gene26774	7.71463e-08	-4.06839	RING/FYVE/PHD zinc finger superfamily protein [Theobroma cacao]
gene23261	1.21174e-44	-2.90731	PREDICTED: uncharacterized protein LOC100254979 [Vitis vinifera]
gene31033	1.32035e-10	-4.64004	hypothetical protein L484_018942 [Morus notabilis]
gene38679	3.738e-93	3.45627	Concanavalin A-like lectin protein kinase family protein, putative [Theobroma cacao]
gene6853	1.05881e-07	-3.95461	hypothetical protein L484_004425 [Morus notabilis]
gene26111	7.26619e-25	#NAME?	hypothetical protein L484_010385 [Morus notabilis]
gene11796	7.95107e-11	-5.51291	Histone H2A variant 1 [Morus notabilis]
gene8423	2.0237e-29	-8.81199	hypothetical protein PRUPE_ppa001116mg [Prunus persica]
gene31733	7.47391e-07	3.55797	PREDICTED: protein SRG1 [Vitis vinifera]
gene13653	1.17955e-05	#NAME?	PREDICTED: UDP-glycosyltransferase 88A1-like [Pyrus x bretschneideri]
gene36083	5.06252e-05	-3.37984	PREDICTED: uncharacterized protein LOC100798019 isoform X1 [Glycine max]
gene1182	1.19137e-27	3.02049	Uncharacterized protein isoform 2 [Theobroma cacao]
gene5119	1.65447e-22	-2.42139	PREDICTED: probable LRR receptor-like serine/threonine-protein kinase At4g08850-like [Fragaria vesca subsp. vesca]
gene23027	8.35872e-10	-4.79816	unknown [Lotus japonicus]
gene1218	1.76704e-08	-4.94056	hypothetical protein PRUPE_ppa003540mg [Prunus persica]
Walnut_newGene_5613	3.8795e-09	Inf	hypothetical protein AMTR_s00025p00218070 [Amborella trichopoda]
gene39728	5.28693e-201	4.93393	Boron transporter 4 [Morus notabilis]
gene28700	4.27274e-49	6.43424	hypothetical protein CICLE_v10021291mg [Citrus clementina]
gene34675	1.5771e-15	-6.74126	PREDICTED: thioredoxin-like protein 4B [Vitis vinifera]
gene13474	7.74635e-22	#NAME?	hypothetical protein JCGZ_10511 [Jatropha curcas]
gene30796	3.12212e-41	-3.39494	hypothetical protein JCGZ_19925 [Jatropha curcas]
gene37524	7.86926e-65	-4.40304	PREDICTED: uncharacterized protein LOC104599795 [Nelumbo nucifera]
gene27353	1.11762e-118	-5.05782	hypothetical protein L484_017755 [Morus notabilis]
Walnut_newGene_952	3.8106e-15	7.57526	hypothetical protein CICLE_v10014387mg [Citrus clementina]
gene36141	1.25286e-15	2.5726	Mitogen-activated protein kinase kinase kinase 5, putative isoform 1 [Theobroma cacao]
gene38500	1.0993e-60	2.23307	hypothetical protein EUGRSUZ_B01156 [Eucalyptus grandis]
gene25071	1.08197e-33	-7.17393	hypothetical protein PRUPE_ppa010416mg [Prunus persica]
gene31447	3.34624e-33	5.37252	NAC domain protein, IPR003441 [Theobroma cacao]
gene31706	1.18958e-50	#NAME?	PREDICTED: probable aldo-keto reductase 1 [Prunus mume]
gene34660	8.88528e-10	#NAME?	hypothetical protein F383_30849 [Gossypium arboreum]
gene34684	6.47514e-09	-6.10721	Mannan endo-1,4-beta-mannosidase 6 [Morus notabilis]
gene38908	9.03474e-53	-3.80472	PREDICTED: uncharacterized protein LOC100854636 [Vitis vinifera]
gene35573	0.000294488	#NAME?	PREDICTED: protein HOTHEAD [Prunus mume]
gene23229	3.24376e-26	-8.61979	hypothetical protein PRUPE_ppa012647mg [Prunus persica]
Walnut_newGene_4117	1.24961e-09	-4.24384	hypothetical protein CICLE_v10028832mg [Citrus clementina]
gene15987	7.06392e-09	-2.04869	hypothetical protein CISIN_1g023930mg [Citrus sinensis]
gene36951	0.00036505	-2.64888	PREDICTED: uncharacterized protein LOC100273717 isoform X1 [Zea mays]
gene36593	7.88798e-18	-2.13858	PREDICTED: serine/threonine-protein kinase HT1 [Cucumis melo]
gene38891	7.72628e-42	-2.52597	PREDICTED: probable sodium/metabolite cotransporter BASS4, chloroplastic isoform X1 [Vitis vinifera]
gene18221	1.33955e-07	-4.99744	hypothetical protein POPTR_0002s01430g [Populus trichocarpa]
gene8607	1.37919e-23	-8.56675	PREDICTED: glycerol-3-phosphate dehydrogenase [NAD(+)] GPDHC1, cytosolic [Malus domestica]
gene34801	1.82285e-08	-2.83413	PREDICTED: MATE efflux family protein LAL5-like [Populus euphratica]
gene15483	1.16104e-28	8.77589	glutathione S-transferase [Betula pendula]
gene25225	1.2832e-08	5.36982	FAD-binding domain-containing family protein [Populus trichocarpa]
gene39538	0.00017304	-2.8208	PREDICTED: wall-associated receptor kinase-like 22 [Malus domestica]
gene4771	5.04788e-25	-2.13918	Chorismate mutase [Morus notabilis]
gene41480	1.00227e-26	-3.49351	Oleoyl-acyl carrier protein thioesterase [Morus notabilis]
Walnut_newGene_568	7.26658e-07	2.90655	PREDICTED: ataxin-3 homolog [Cicer arietinum]
gene13509	1.38326e-15	3.91148	hypothetical protein CICLE_v10019990mg [Citrus clementina]
gene23210	3.3646e-47	3.58447	lipoxygenase [Camellia sinensis]
gene33434	0.000421206	2.53218	hypothetical protein EUGRSUZ_B03143 [Eucalyptus grandis]
gene10284	4.98757e-10	-5.06271	PREDICTED: uncharacterized protein LOC100853798 isoform X1 [Vitis vinifera]
gene31208	1.1893e-08	#NAME?	PREDICTED: tyrosine/DOPA decarboxylase 2-like [Nelumbo nucifera]
gene5348	9.7724e-16	-4.84798	hypothetical protein POPTR_0003s21430g [Populus trichocarpa]
gene29049	1.03228e-07	2.84749	hypothetical protein JCGZ_21282 [Jatropha curcas]
gene11390	7.82233e-16	7.63392	PREDICTED: RNA-binding protein FUS isoform X1 [Vitis vinifera]
gene33871	1.52443e-13	#NAME?	PREDICTED: UDP-glycosyltransferase 87A1-like [Prunus mume]
gene41885	5.81054e-10	#NAME?	PREDICTED: transcription factor MYB46 [Vitis vinifera]
gene5946	0.000187841	-2.84921	Kinase APK1B, chloroplast, putative [Theobroma cacao]
gene1601	1.27925e-07	-3.41563	PREDICTED: uncharacterized protein LOC100247040 isoform X2 [Vitis vinifera]
Walnut_newGene_53	6.08284e-10	#NAME?	hypothetical protein L484_009969 [Morus notabilis]
Walnut_newGene_357	1.09971e-37	#NAME?	PREDICTED: carboxypeptidase A6-like [Cicer arietinum]
gene24582	1.77591e-23	-3.53793	hypothetical protein JCGZ_04252 [Jatropha curcas]
gene17211	3.782e-12	2.12457	unnamed protein product [Vitis vinifera]
gene14357	1.27532e-89	-6.59499	PREDICTED: 2-alkenal reductase (NADP(+)-dependent)-like [Pyrus x bretschneideri]
gene36801	0.000462359	-3.52372	hypothetical protein JCGZ_01302 [Jatropha curcas]
gene12013	1.05228e-73	-3.22228	hypothetical protein PRUPE_ppa001798mg [Prunus persica]
gene32213	0.000155361	2.57737	MADS-box protein 1S [Betula luminifera]
gene30145	0.000851064	-2.43232	PREDICTED: uncharacterized protein LOC102630060 [Citrus sinensis]
gene42411	2.67989e-31	2.72326	UDP-glycosyltransferase 73B4, putative [Theobroma cacao]
gene22909	2.24191e-26	-3.47336	PREDICTED: uncharacterized protein At4g06744-like, partial [Populus euphratica]
Walnut_newGene_7535	7.90286e-10	#NAME?	hypothetical protein VITISV_006169 [Vitis vinifera]
gene4583	2.07681e-10	-3.25625	putative anion transporter 3 [Morus notabilis]
gene25889	2.08327e-87	-2.85031	hypothetical protein JCGZ_25039 [Jatropha curcas]
Walnut_newGene_5104	0.000328285	2.52522	Histone H2A protein 9 [Theobroma cacao]
gene12810	8.34757e-09	2.49059	Embryo sac development arrest 12, putative [Theobroma cacao]
gene13200	3.56347e-44	#NAME?	hypothetical protein L484_022467 [Morus notabilis]
gene24702	3.48404e-08	-2.12108	PREDICTED: receptor-like cytosolic serine/threonine-protein kinase RBK1 [Vitis vinifera]
gene21936	1.2132e-15	-7.64025	PREDICTED: E3 ubiquitin-protein ligase CHFR [Prunus mume]
gene10175	8.23267e-62	-6.0541	hypothetical protein JCGZ_22366 [Jatropha curcas]
gene22919	4.08283e-149	4.41495	PREDICTED: alcohol dehydrogenase-like 3 [Vitis vinifera]
gene16743	3.92303e-41	-6.73073	PREDICTED: secretory carrier-associated membrane protein 4-like [Cucumis sativus]
gene39792	4.10451e-38	-3.39445	hypothetical protein PRUPE_ppa001398mg [Prunus persica]
gene7213	1.73216e-13	-2.74518	hypothetical protein VITISV_025709 [Vitis vinifera]
gene11007	1.03801e-33	-5.21206	hypothetical protein JCGZ_24792 [Jatropha curcas]
gene6692	9.21434e-12	2.27341	PREDICTED: probable signal peptidase complex subunit 1-like [Citrus sinensis]
gene5913	1.9807e-06	3.73973	PREDICTED: L-arabinokinase-like [Eucalyptus grandis]
gene22513	3.97356e-10	-4.87016	PREDICTED: uncharacterized protein LOC100264117 [Vitis vinifera]
gene37092	2.28369e-31	2.16413	Putative amidase [Morus notabilis]
Walnut_newGene_4348	4.19017e-09	6.22856	PREDICTED: serine/threonine-protein kinase tricorner-like isoform X2 [Beta vulgaris subsp. vulgaris]
gene4792	2.56899e-70	5.22494	Kinase, putative [Theobroma cacao]
gene28514	0.000274076	2.52193	kinase, putative [Ricinus communis]
gene25453	6.69482e-06	-4.03849	PREDICTED: alpha-galactosidase-like [Nelumbo nucifera]
gene13293	1.58762e-48	-5.02303	hypothetical protein PRUPE_ppa000363mg [Prunus persica]
gene15718	1.65899e-07	-2.72759	PREDICTED: protein NRT1/ PTR FAMILY 6.3 [Vitis vinifera]
gene37344	2.64023e-09	-3.15265	Nitrogen regulatory protein P-II [Theobroma cacao]
gene16334	3.41553e-99	3.43475	PREDICTED: probable LRR receptor-like serine/threonine-protein kinase At1g56130 [Vitis vinifera]
gene23065	4.84078e-11	-7.11331	PREDICTED: putative ubiquitin-conjugating enzyme E2 38 [Populus euphratica]
gene16111	3.81679e-80	-3.33528	PREDICTED: probable receptor protein kinase TMK1 [Vitis vinifera]
gene12744	3.84494e-143	-5.09434	PREDICTED: vacuolar cation/proton exchanger 3-like [Pyrus x bretschneideri]
gene4915	1.09837e-133	-11.0338	PREDICTED: isoflavone 2&apos;-hydroxylase-like [Vitis vinifera]
gene33865	3.72465e-46	-2.87326	PREDICTED: probable LRR receptor-like serine/threonine-protein kinase At1g14390 [Prunus mume]
Walnut_newGene_471	3.35713e-05	-5.99401	hypothetical protein VITISV_005267 [Vitis vinifera]
gene23725	1.74453e-11	2.43647	PREDICTED: sugar transporter ERD6-like 5 [Eucalyptus grandis]
gene40563	1.08858e-21	-5.53779	hypothetical protein POPTR_0002s09270g [Populus trichocarpa]
gene34153	1.67682e-15	Inf	hypothetical protein VITISV_044100 [Vitis vinifera]
gene15687	1.55283e-12	-2.08684	50 kDa ketoavyl-ACP synthase [Ricinus communis]
gene38629	1.1318e-24	-2.09973	auxin influx transport protein [Casuarina glauca]
gene42709	9.31052e-06	-2.7296	hypothetical protein PRUPE_ppa008617mg [Prunus persica]
gene28755	2.42208e-15	3.26268	hypothetical protein L484_015070 [Morus notabilis]
gene39053	1.56565e-59	-8.98154	Ethylene-responsive transcription factor WIN1 -like protein [Gossypium arboreum]
gene8659	2.0483e-45	-2.6066	PREDICTED: myosin-10 [Prunus mume]
gene28758	5.45665e-28	-2.92951	PREDICTED: receptor-like protein kinase At3g21340-like [Citrus sinensis]
gene21246	8.95213e-09	6.14371	PREDICTED: LOW QUALITY PROTEIN: uncharacterized protein LOC103324604 [Prunus mume]
gene1726	8.7048e-107	4.86505	hypothetical protein PRUPE_ppa026839mg [Prunus persica]
gene37887	6.18791e-52	-4.66242	Leucine-rich repeat protein kinase family protein isoform 1 [Theobroma cacao]
gene36447	3.31862e-50	-9.22479	Pleiotropic drug resistance 4 [Theobroma cacao]
gene30778	1.5328e-06	-3.61488	unnamed protein product [Vitis vinifera]
gene11514	2.24686e-13	-7.70387	PREDICTED: probable LRR receptor-like serine/threonine-protein kinase At3g47570 [Vitis vinifera]
gene16131	7.09833e-11	#NAME?	Ovate family protein 13, putative [Theobroma cacao]
Walnut_newGene_6410	2.56479e-50	#NAME?	hypothetical protein POPTR_0001s40220g [Populus trichocarpa]
gene4135	9.00233e-10	#NAME?	hypothetical protein PRUPE_ppa022362mg [Prunus persica]
gene22563	9.73484e-297	-10.3362	STS14 protein precursor, putative [Ricinus communis]
gene29595	2.03154e-14	#NAME?	PREDICTED: wall-associated receptor kinase 2-like [Vitis vinifera]
gene38328	3.98676e-06	2.34373	unnamed protein product [Coffea canephora]
gene24242	3.174e-05	-2.79334	PREDICTED: uncharacterized protein LOC103324389 [Prunus mume]
gene35745	7.3368e-10	-7.19582	hypothetical protein CISIN_1g020951mg [Citrus sinensis]
gene41286	1.41048e-68	-4.76405	Senescence-related gene 1 [Theobroma cacao]
gene14875	4.47924e-05	3.22073	Cf-4/9 disease resistance-like family protein [Populus trichocarpa]
gene29981	3.02748e-06	-2.93168	PREDICTED: auxin-responsive protein IAA9 [Prunus mume]
gene33391	0.00044226	-5.30601	hypothetical protein PRUPE_ppa027006mg [Prunus persica]
gene27160	2.20338e-08	-5.28198	PREDICTED: UDP-arabinopyranose mutase 1 isoform X1 [Vitis vinifera]
gene39354	2.58927e-39	2.51298	PREDICTED: auxin-responsive protein IAA4-like [Nelumbo nucifera]
gene25349	2.59367e-49	2.07714	Nudix hydrolase 18 [Morus notabilis]
gene31185	0.000230073	-2.76375	hypothetical protein PRUPE_ppa005477mg [Prunus persica]
Walnut_newGene_3814	7.70466e-47	3.47536	PREDICTED: uncharacterized protein LOC104601898 [Nelumbo nucifera]
gene32922	4.88576e-11	-3.17866	PREDICTED: homeobox-leucine zipper protein ATHB-13 [Vitis vinifera]
gene40323	2.35346e-09	-5.42322	PREDICTED: EPIDERMAL PATTERNING FACTOR-like protein 6 [Vitis vinifera]
gene32525	1.42512e-34	-2.15787	1,3-beta glucanase [Quercus suber]
gene40028	4.96988e-24	-5.98008	Xyloglucan endotransglucosylase/hydrolase 16 [Theobroma cacao]
gene20866	8.32097e-12	#NAME?	PREDICTED: TMV resistance protein N-like [Prunus mume]
gene31053	9.2727e-21	-6.77409	hypothetical protein PRUPE_ppa011598mg [Prunus persica]
gene11851	7.3711e-13	-3.9007	hypothetical protein PRUPE_ppa011032mg [Prunus persica]
gene33652	7.95384e-05	-2.84115	hypothetical protein PRUPE_ppa011878mg [Prunus persica]
gene33518	1.37692e-13	-5.23758	hypothetical protein PRUPE_ppa010420mg [Prunus persica]
gene7629	4.55811e-113	-6.28816	hypothetical protein PRUPE_ppa004996mg [Prunus persica]
gene12974	2.64631e-06	-3.16474	PREDICTED: uncharacterized protein LOC103327366 [Prunus mume]
gene22488	3.62368e-27	-7.75013	PREDICTED: cytochrome P450 78A4-like [Vitis vinifera]
gene2573	5.01503e-24	2.32079	Calcium-dependent protein kinase SK5 [Morus notabilis]
gene17131	7.51907e-47	4.14627	hypothetical protein PRUPE_ppa001858mg [Prunus persica]
gene24919	7.93596e-12	#NAME?	hypothetical protein CISIN_1g008090mg [Citrus sinensis]
gene25030	7.33369e-96	Inf	PREDICTED: uncharacterized protein LOC103323832 [Prunus mume]
gene28814	2.68097e-16	-3.88687	PREDICTED: pleiotropic drug resistance protein 2-like [Nelumbo nucifera]
Walnut_newGene_1575	1.4151e-12	-3.08029	Inorganic H pyrophosphatase family protein isoform 1 [Theobroma cacao]
gene28968	3.82613e-11	4.03473	hypothetical protein L484_010557 [Morus notabilis]
gene38694	4.26068e-06	-2.57064	PREDICTED: patellin-6 [Vitis vinifera]
gene21695	1.87551e-10	3.10282	hypothetical protein PRUPE_ppa008875mg [Prunus persica]
gene32687	7.0868e-58	2.6652	PREDICTED: putative formamidase C869.04 isoform X2 [Vitis vinifera]
gene12563	4.93086e-20	-3.31651	GDSL esterase/lipase [Morus notabilis]
gene1361	6.88326e-16	3.41195	hypothetical protein PRUPE_ppa019218mg [Prunus persica]
gene43118	1.93821e-22	3.65096	PREDICTED: UDP-glycosyltransferase 74B1-like [Prunus mume]
gene14465	1.42408e-25	#NAME?	Root hair defective 3 GTP-binding protein (RHD3) isoform 1 [Theobroma cacao]
gene37208	4.50333e-16	-2.20961	hypothetical protein POPTR_0007s13320g [Populus trichocarpa]
gene21215	0.000160248	-2.57631	PREDICTED: basic leucine zipper 9-like [Fragaria vesca subsp. vesca]
gene23035	1.40035e-25	2.71719	PREDICTED: kinesin heavy chain-like isoform X2 [Vitis vinifera]
gene2791	1.29843e-196	-5.27803	glycerophosphoryl diester phosphodiesterase, putative [Ricinus communis]
gene3456	3.44155e-26	2.18301	Cytochrome C oxidase copper chaperone isoform 2, partial [Theobroma cacao]
gene3603	0.000271867	-2.15565	O-Glycosyl hydrolases family 17 protein [Theobroma cacao]
gene39817	4.27777e-07	-2.60263	hypothetical protein POPTR_0009s09380g [Populus trichocarpa]
gene33837	7.70485e-86	-8.98379	hypothetical protein JCGZ_21722 [Jatropha curcas]
gene29844	1.72288e-13	#NAME?	1-acylglycerol-3-phosphate acyltransferase, putative [Ricinus communis]
gene39488	8.83467e-05	#NAME?	hypothetical protein PRUPE_ppa000726mg [Prunus persica]
gene31115	1.58306e-24	-4.53062	hypothetical protein CICLE_v10028305mg [Citrus clementina]
gene18057	1.09625e-12	-5.85615	PREDICTED: uncharacterized protein LOC103343807 [Prunus mume]
gene3534	1.16188e-06	-4.55859	hypothetical protein PRUPE_ppa004043mg [Prunus persica]
Walnut_newGene_1619	3.92142e-31	2.95676	PREDICTED: cysteine-rich receptor-like protein kinase 10 [Vitis vinifera]
gene3270	4.83206e-06	-2.00574	homeobox protein, putative [Ricinus communis]
gene3485	1.65967e-114	-4.53639	hypothetical protein CICLE_v10009639mg [Citrus clementina]
gene1926	2.70816e-06	-2.75513	C-4 methyl sterol oxidase, putative [Ricinus communis]
gene37371	2.24135e-15	-4.09352	Beta-1,3-galactosyltransferase sqv-2, putative [Ricinus communis]
gene18462	9.59481e-05	2.47978	hypothetical protein VITISV_004299 [Vitis vinifera]
gene32289	4.34515e-73	-3.74349	PREDICTED: probable receptor protein kinase TMK1 [Vitis vinifera]
gene41763	6.83985e-57	3.81452	metal ion binding protein, putative [Ricinus communis]
gene8454	1.29452e-92	3.52916	hypothetical protein PRUPE_ppa008135mg [Prunus persica]
gene21043	0.00020791	-3.74948	PREDICTED: cyclic nucleotide-gated ion channel 1 [Sesamum indicum]
gene12058	3.83272e-14	2.41658	PREDICTED: mitogen-activated protein kinase kinase kinase 3 [Prunus mume]
gene30663	3.3942e-09	-2.694	RING/U-box superfamily protein isoform 2 [Theobroma cacao]
gene42104	2.05597e-15	2.71497	NAC transcription factor 037 [Jatropha curcas]
gene17903	2.72682e-05	2.75403	PREDICTED: F-box protein At2g27310-like [Fragaria vesca subsp. vesca]
gene23085	2.51241e-10	#NAME?	PREDICTED: uncharacterized protein LOC101294367 [Fragaria vesca subsp. vesca]
gene36776	4.43044e-08	#NAME?	hypothetical protein VITISV_034590 [Vitis vinifera]
gene16704	1.82967e-37	-3.2366	alcohol dehydrogenase, putative [Ricinus communis]
gene1093	5.45112e-08	#NAME?	hypothetical protein PRUPE_ppa007015mg [Prunus persica]
gene14899	5.49818e-17	2.9491	PREDICTED: GEM-like protein 4 [Populus euphratica]
gene34234	4.82906e-19	2.87414	hypothetical protein PRUPE_ppa000470mg [Prunus persica]
gene31273	1.72873e-11	-8.61338	PREDICTED: MATE efflux family protein 4, chloroplastic [Prunus mume]
gene28542	2.12887e-70	2.41223	unnamed protein product [Vitis vinifera]
gene3582	7.14117e-17	-6.40972	hypothetical protein PRUPE_ppa011962mg [Prunus persica]
gene28089	6.18337e-48	3.70531	PREDICTED: 26S proteasome non-ATPase regulatory subunit 14 homolog [Populus euphratica]
Walnut_newGene_5921	2.06841e-34	-2.3211	PREDICTED: probable methyltransferase PMT6 [Populus euphratica]
gene16360	9.95781e-06	-4.24432	Uncharacterized protein TCM_016960 [Theobroma cacao]
gene12976	3.00587e-12	-7.25808	AMP-dependent synthetase and ligase family protein [Theobroma cacao]
gene37594	1.02507e-09	-3.89384	PREDICTED: 3-ketoacyl-CoA synthase 12 [Eucalyptus grandis]
gene35168	0.000577876	-2.07538	hypothetical protein JCGZ_22195 [Jatropha curcas]
Walnut_newGene_271	4.23225e-34	-7.57035	PREDICTED: uncharacterized protein LOC104452694 [Eucalyptus grandis]
gene5677	9.07958e-05	-5.21632	hypothetical protein POPTR_0002s06170g [Populus trichocarpa]
gene23726	1.49431e-30	6.72315	PREDICTED: probable LRR receptor-like serine/threonine-protein kinase RKF3 [Prunus mume]
gene25470	9.10036e-30	-2.35089	PREDICTED: nitrate transporter 1.7-like [Glycine max]
gene7528	9.78258e-154	#NAME?	PREDICTED: ankyrin repeat-containing protein At3g12360-like [Prunus mume]
gene1764	5.13749e-15	2.77648	hypothetical protein JCGZ_14570 [Jatropha curcas]
gene38464	1.17898e-21	#NAME?	hypothetical protein POPTR_0016s11950g [Populus trichocarpa]
gene39400	4.97878e-05	2.82184	PREDICTED: WAT1-related protein At4g08300-like [Pyrus x bretschneideri]
gene3191	3.45651e-14	-7.42304	PREDICTED: neurofilament heavy polypeptide isoform X1 [Prunus mume]
gene8820	8.46453e-07	3.05129	PREDICTED: TMV resistance protein N-like isoform X6 [Citrus sinensis]
gene14343	2.06556e-69	-5.61931	PREDICTED: glutamate receptor 3.7 [Prunus mume]
gene4101	5.17043e-36	6.19807	PREDICTED: lachrymatory-factor synthase-like [Cicer arietinum]
gene33954	9.30977e-15	-4.00054	hypothetical protein POPTR_0001s15790g [Populus trichocarpa]
gene36857	0	7.58315	RecName: Full=Lupeol synthase [Betula platyphylla]
gene10855	4.75043e-228	-5.08459	cellulose synthase [Betula luminifera]
gene31372	1.06513e-10	2.07008	flowering locus C-like protein [Juglans regia]
gene14537	4.75045e-18	-3.36324	hypothetical protein PRUPE_ppa018551mg [Prunus persica]
gene36410	6.54867e-05	-2.73938	PREDICTED: uncharacterized protein LOC100267812 [Vitis vinifera]
gene21230	1.15059e-35	Inf	PREDICTED: replication protein A 14 kDa subunit B [Prunus mume]
gene24369	2.19259e-09	-3.83437	hypothetical protein L484_014826 [Morus notabilis]
gene4737	6.72238e-51	2.12033	hypothetical protein JCGZ_10941 [Jatropha curcas]
gene31567	7.37002e-20	2.15361	hypothetical protein JCGZ_18911 [Jatropha curcas]
Walnut_newGene_5682	2.66874e-69	8.53546	PREDICTED: arginine/serine-rich coiled-coil protein 2 isoform X2 [Vitis vinifera]
gene31621	3.82788e-30	2.9188	uncharacterized protein LOC100814228 [Glycine max]
gene15580	0	9.97714	chitinase, putative [Ricinus communis]
gene5820	2.56867e-22	2.20218	hypothetical protein POPTR_0005s20850g [Populus trichocarpa]
gene33010	1.17389e-10	#NAME?	hypothetical protein POPTR_0022s00780g [Populus trichocarpa]
gene39046	1.55202e-09	-2.31048	hypothetical protein JCGZ_04419 [Jatropha curcas]
Walnut_newGene_1576	2.40806e-22	#NAME?	putative adenine nucleotide translocase [Castanea sativa]
gene25022	6.18304e-10	#NAME?	PREDICTED: FHA domain-containing protein At4g14490-like [Prunus mume]
gene31977	6.30512e-09	Inf	conserved hypothetical protein [Ricinus communis]
Walnut_newGene_1437	0.000895304	2.02657	hypothetical protein CICLE_v10015979mg [Citrus clementina]
gene2661	9.38154e-09	-4.04279	hypothetical protein JCGZ_00827 [Jatropha curcas]
gene11984	4.61715e-06	Inf	hypothetical protein PRUPE_ppa016284mg [Prunus persica]
gene32038	5.00174e-08	-3.09314	PREDICTED: cysteine-rich receptor-like protein kinase 2 [Vitis vinifera]
gene23696	5.21595e-18	4.95538	hypothetical protein VITISV_014747 [Vitis vinifera]
gene30403	1.28196e-27	-13.8547	PREDICTED: cytochrome P450 71A1-like [Fragaria vesca subsp. vesca]
gene22446	1.99747e-93	-11.2023	PREDICTED: GDSL esterase/lipase At2g04570-like [Populus euphratica]
gene7830	6.56177e-10	-2.1375	hypothetical protein JCGZ_21527 [Jatropha curcas]
gene28863	0.000444736	-3.90425	hypothetical protein PRUPE_ppa025692mg [Prunus persica]
Walnut_newGene_167	1.95172e-10	#NAME?	--
gene30669	1.27379e-06	-3.8273	C2H2-type zinc finger protein 1 [Populus trichocarpa]
gene5456	1.2077e-13	-5.68286	DNAJ heat shock family protein [Theobroma cacao]
gene24547	3.53711e-111	5.50872	Cf-4/9 disease resistance-like family protein [Populus trichocarpa]
gene6148	2.74317e-22	#NAME?	PREDICTED: probable aquaporin NIP-type [Prunus mume]
gene40727	4.43026e-10	-2.37295	unnamed protein product [Vitis vinifera]
gene32561	7.8883e-06	-3.04005	hypothetical protein CISIN_1g046374mg, partial [Citrus sinensis]
gene3489	1.0884e-22	3.10811	NAC domain protein, IPR003441 [Theobroma cacao]
gene11614	6.94937e-56	-4.0981	putative receptor-like protein kinase [Morus notabilis]
gene28563	2.0462e-55	3.05152	Seven transmembrane MLO family protein isoform 1 [Theobroma cacao]
gene20886	3.44834e-05	-3.05141	Fasciclin-like arabinogalactan protein [Medicago truncatula]
gene38252	9.62526e-16	-7.64701	PREDICTED: probable boron transporter 2 [Prunus mume]
Walnut_newGene_2152	1.59818e-16	Inf	hypothetical protein PRUPE_ppa002996mg [Prunus persica]
gene39617	3.78457e-07	#NAME?	Gibberellin 20-oxidase, putative [Theobroma cacao]
gene1625	8.43953e-30	Inf	hypothetical protein PRUPE_ppa013497mg [Prunus persica]
gene13954	1.43039e-68	-4.04919	DnaJ homolog subfamily C member 2 [Morus notabilis]
gene464	2.97083e-16	Inf	PREDICTED: cysteine-rich receptor-like protein kinase 19 [Pyrus x bretschneideri]
gene26780	7.95186e-70	7.60289	protein binding protein, putative [Ricinus communis]
gene39930	4.16573e-14	-3.51156	PREDICTED: uncharacterized protein LOC100253188 [Vitis vinifera]
gene16507	0.000663452	-2.64199	PREDICTED: phragmoplast orienting kinesin 2 isoform X1 [Vitis vinifera]
gene29412	7.22383e-06	-3.77094	Salt tolerance 2, putative isoform 1 [Theobroma cacao]
gene36511	3.97858e-22	-3.64619	PREDICTED: protein vip1 [Prunus mume]
gene33525	2.24189e-05	3.43506	Autoinhibited calcium ATPase [Theobroma cacao]
gene41804	1.91077e-23	-2.09062	BCL-2-associated athanogene 3 [Theobroma cacao]
gene14303	6.45899e-09	Inf	PREDICTED: dehydration-responsive element-binding protein 1E [Vitis vinifera]
gene20988	2.81165e-06	-5.22916	hypothetical protein JCGZ_00394 [Jatropha curcas]
gene38799	3.25348e-09	-2.19077	electron transporter, putative [Ricinus communis]
gene11913	4.15531e-11	-6.01717	hypothetical protein PRUPE_ppa023217mg [Prunus persica]
gene3210	2.76644e-06	-4.55185	PREDICTED: protein ECERIFERUM 1-like [Vitis vinifera]
gene30440	8.2927e-37	-2.65031	chloride channel-like family protein [Populus trichocarpa]
gene39615	3.25705e-12	-7.06839	pollen specific protein sf21, putative [Ricinus communis]
gene38339	7.71089e-05	-3.01748	Subunit H2, putative [Theobroma cacao]
gene35551	4.68919e-28	-3.97134	PREDICTED: gibberellin-regulated protein 9 [Eucalyptus grandis]
gene9792	3.63199e-05	-5.0114	auxin influx carrier protein [Mangifera indica]
gene31396	7.02758e-12	-2.99317	hypothetical protein L484_027806 [Morus notabilis]
gene42783	2.96963e-40	9.31513	PREDICTED: U11/U12 small nuclear ribonucleoprotein 48 kDa protein [Pyrus x bretschneideri]
gene42040	4.62209e-17	-4.46283	Fatty acid hydroxylase superfamily [Theobroma cacao]
gene12044	2.71796e-10	5.4129	PREDICTED: TMV resistance protein N-like [Pyrus x bretschneideri]
gene27101	7.90286e-10	-2.54837	PREDICTED: UPF0553 protein-like [Cucumis melo]
gene28404	1.19844e-10	-7.62868	uncharacterized protein LOC100381281 [Zea mays]
gene27597	0.000125246	2.1477	PREDICTED: protein FANTASTIC FOUR 1-like [Vitis vinifera]
gene36930	0.000143192	-3.67104	hypothetical protein PRUPE_ppa010130mg [Prunus persica]
gene29076	1.15848e-05	-2.15251	PREDICTED: uncharacterized protein LOC100266758 [Vitis vinifera]
gene38384	1.62397e-07	-7.73893	Ankyrin repeat-containing protein isoform 1 [Theobroma cacao]
gene21225	4.14625e-05	-2.65433	PREDICTED: LOW QUALITY PROTEIN: ras-related protein Rab7 [Eucalyptus grandis]
gene41367	5.98567e-07	-3.00918	hypothetical protein L484_007546 [Morus notabilis]
gene29838	4.62318e-66	-6.00591	Uroporphyrinogen decarboxylase [Morus notabilis]
gene39084	3.50649e-05	-2.60817	PREDICTED: auxin-responsive protein IAA29-like [Populus euphratica]
gene11520	3.02415e-30	#NAME?	PREDICTED: PTI1-like tyrosine-protein kinase At3g15890-like [Fragaria vesca subsp. vesca]
gene23412	5.06546e-14	4.24532	unnamed protein product [Vitis vinifera]
Walnut_newGene_3182	2.62336e-16	Inf	unnamed protein product [Vitis vinifera]
gene22058	2.08033e-34	#NAME?	PREDICTED: ankyrin repeat-containing protein At3g12360-like [Vitis vinifera]
gene17935	4.57782e-10	Inf	CBF transcription factor [Juglans regia]
gene34429	4.30311e-10	4.00883	PREDICTED: uncharacterized protein LOC104881698 [Vitis vinifera]
gene27033	7.62753e-12	-4.40382	Polygalacturonase [Morus notabilis]
gene10026	1.81066e-23	-5.65491	hypothetical protein L484_002452 [Morus notabilis]
gene35137	8.94462e-05	-2.40359	phosphofructokinase [Hevea brasiliensis]
gene5475	1.17663e-161	-4.57236	Pleiotropic drug resistance protein 1 [Glycine soja]
gene24627	2.05141e-11	-6.89577	Alpha/beta-Hydrolases superfamily protein isoform 2 [Theobroma cacao]
gene39844	2.20835e-25	-5.34729	Arabinogalactan protein 20 [Theobroma cacao]
gene29499	1.95552e-06	-3.20003	Duplicated homeodomain-like superfamily protein, putative [Theobroma cacao]
gene3673	4.41226e-07	-4.8422	hypothetical protein PRUPE_ppa018324mg [Prunus persica]
gene38529	2.59707e-15	-5.44403	PREDICTED: uncharacterized protein LOC100264790 [Vitis vinifera]
gene18492	0.000619611	-3.73116	PREDICTED: LRR receptor-like serine/threonine-protein kinase GSO2 isoform X3 [Vitis vinifera]
gene29960	2.19168e-47	2.81893	protease inhibitor [Medicago truncatula]
gene32970	6.5468e-32	#NAME?	serine-threonine protein kinase, plant-type, putative [Ricinus communis]
gene10264	4.61204e-12	-7.04375	hypothetical protein JCGZ_16402 [Jatropha curcas]
gene32520	8.04159e-13	Inf	PREDICTED: peptidyl-tRNA hydrolase 2, mitochondrial-like [Cucumis sativus]
gene5987	1.31449e-27	-6.98871	PREDICTED: TMV resistance protein N-like [Pyrus x bretschneideri]
Walnut_newGene_5100	1.99859e-18	Inf	PREDICTED: uncharacterized protein LOC101305262 [Fragaria vesca subsp. vesca]
Walnut_newGene_5271	0.000513677	-2.42447	PREDICTED: probable methyltransferase PMT13 [Prunus mume]
gene24732	1.07538e-16	#NAME?	hypothetical protein CICLE_v10028089mg [Citrus clementina]
gene15219	2.76943e-30	3.62552	WRKY family transcription factor [Theobroma cacao]
gene4749	1.6979956356918e-313	-9.74826	hypothetical protein POPTR_0279s00200g [Populus trichocarpa]
gene41468	2.76467e-07	-5.05214	hypothetical protein JCGZ_18680 [Jatropha curcas]
gene38865	8.16429e-202	4.69116	Sec14p-like phosphatidylinositol transfer family protein [Theobroma cacao]
gene29511	6.77532e-20	7.21559	PREDICTED: probable WRKY transcription factor 72 isoform X2 [Nelumbo nucifera]
gene30450	2.66532e-05	3.08731	Uncharacterized protein isoform 1 [Theobroma cacao]
gene16463	2.31092e-07	4.55897	PREDICTED: expansin-A11 [Prunus mume]
gene27281	5.89436e-06	-2.84816	Membrane lipoprotein [Theobroma cacao]
gene9646	7.27907e-61	-5.79312	hypothetical protein ARALYDRAFT_887301 [Arabidopsis lyrata subsp. lyrata]
gene2148	2.97049e-19	-5.24453	PREDICTED: probable inactive receptor kinase At5g10020 [Prunus mume]
gene35489	7.40751e-15	Inf	Inositol polyphosphate 5-phosphatase 11 [Theobroma cacao]
gene35692	1.1162e-26	-2.38151	PREDICTED: uncharacterized protein LOC103432833 [Malus domestica]
gene14090	2.1398e-53	-2.46394	PREDICTED: photosystem II 5 kDa protein, chloroplastic-like [Fragaria vesca subsp. vesca]
gene37784	8.56935e-38	2.12925	PREDICTED: exocyst complex component EXO70B1 [Vitis vinifera]
gene41236	0.000974926	-6.28076	PREDICTED: glutaredoxin-C13 [Vitis vinifera]
gene16464	2.08103e-06	-3.04254	PREDICTED: UPF0496 protein At1g20180-like [Citrus sinensis]
gene35324	2.21192e-08	-3.39397	PREDICTED: carbonic anhydrase 2-like [Vitis vinifera]
gene4641	0.000552554	-2.22009	hypothetical protein CISIN_1g048629mg [Citrus sinensis]
gene14331	2.16704e-17	2.95134	PREDICTED: strictosidine synthase 1 [Prunus mume]
gene39810	3.49221e-54	2.74187	protein phosphatase 2c, putative [Ricinus communis]
gene22220	4.98804e-09	-2.82545	PREDICTED: B3 domain-containing protein Os04g0386900-like [Fragaria vesca subsp. vesca]
gene18762	2.69389e-07	2.68706	U-box domain-containing protein kinase family protein, putative [Theobroma cacao]
gene31196	1.39868e-18	-3.00753	PREDICTED: L-ascorbate oxidase-like [Citrus sinensis]
gene10578	4.49961e-25	-3.25141	hypothetical protein PHAVU_001G107600g [Phaseolus vulgaris]
gene24695	7.32152e-05	-3.12986	hypothetical protein PRUPE_ppa023622mg [Prunus persica]
gene13840	0.000770543	-2.02435	hypothetical protein JCGZ_23416 [Jatropha curcas]
gene26658	4.5634e-12	-5.75306	PREDICTED: uncharacterized protein At4g22758-like [Populus euphratica]
gene22119	6.01971e-08	-4.21211	hypothetical protein POPTR_0002s00730g [Populus trichocarpa]
gene5612	1.29837e-11	2.00853	JAZ2 [Hevea brasiliensis]
gene14319	1.19507e-12	-3.80331	PREDICTED: uncharacterized protein LOC103341387 isoform X2 [Prunus mume]
gene2789	2.01337e-111	3.99239	hypothetical protein JCGZ_11251 [Jatropha curcas]
gene39355	2.7234e-116	-3.7908	auxin-induced protein aux28 [Populus trichocarpa]
gene9022	4.63914e-09	#NAME?	PREDICTED: UDP-glycosyltransferase 73D1 [Vitis vinifera]
gene19014	7.73434e-83	7.16735	PREDICTED: putative wall-associated receptor kinase-like 16 [Vitis vinifera]
gene41416	0.000816796	2.19697	AP2/B3-like transcriptional factor family protein, putative [Theobroma cacao]
gene32805	1.83219e-13	Inf	PREDICTED: probable chlorophyll(ide) b reductase NYC1, chloroplastic [Prunus mume]
gene41627	3.12982e-23	-3.5257	PREDICTED: uncharacterized protein LOC104092367 [Nicotiana tomentosiformis]
gene2849	9.96497e-89	3.18301	PREDICTED: cellulose synthase-like protein E6 [Prunus mume]
gene20210	6.16385e-37	-3.64112	PREDICTED: 2-alkenal reductase (NADP(+)-dependent)-like [Citrus sinensis]
gene41519	1.47203e-12	2.34053	hypothetical protein JCGZ_10140 [Jatropha curcas]
gene1660	1.78701e-05	-6.49994	hypothetical protein PRUPE_ppa004043mg [Prunus persica]
gene13135	7.47081e-43	2.55008	PREDICTED: peroxidase 12-like [Fragaria vesca subsp. vesca]
gene10149	7.10957e-06	-2.80638	PREDICTED: AP-3 complex subunit delta-like [Glycine max]
gene2350	4.90543e-13	-3.27952	receptor protein kinase, putative [Ricinus communis]
gene37094	3.97885e-21	-6.4375	PREDICTED: uncharacterized protein LOC105134527 [Populus euphratica]
gene3550	2.14619e-15	Inf	PREDICTED: uncharacterized protein LOC100258838 [Vitis vinifera]
gene37724	2.53113e-156	-4.88583	hypothetical protein CICLE_v10020715mg [Citrus clementina]
gene35076	1.31671e-38	-6.33238	hypothetical protein POPTR_0012s07890g [Populus trichocarpa]
gene8189	6.12675e-07	#NAME?	NAC domain-containing protein [Boehmeria nivea]
gene17311	1.80243e-10	-3.53001	PREDICTED: eukaryotic translation initiation factor 4G isoform X2 [Vitis vinifera]
gene41531	8.06711e-17	3.85981	hypothetical protein CISIN_1g036938mg [Citrus sinensis]
gene27606	9.26324e-10	2.96901	hypothetical protein PRUPE_ppa009904mg [Prunus persica]
gene13545	9.28086e-08	-3.94945	PREDICTED: uncharacterized protein LOC103928740 [Pyrus x bretschneideri]
gene42703	0.000188884	3.20945	hypothetical protein CISIN_1g0039202mg, partial [Citrus sinensis]
gene7091	7.02665e-18	-5.52767	hypothetical protein VITISV_007510 [Vitis vinifera]
gene16768	8.9428e-41	-6.59954	Serine/threonine-protein kinase WNK-related isoform 1 [Theobroma cacao]
gene8016	1.27214e-150	4.43036	hypothetical protein POPTR_0007s05910g [Populus trichocarpa]
gene7998	4.05264e-47	2.56705	hypothetical protein JCGZ_06818 [Jatropha curcas]
gene16153	3.78461e-63	Inf	conserved hypothetical protein [Ricinus communis]
gene22620	2.16364e-05	-6.35058	transcription factor, putative [Ricinus communis]
gene23553	4.63603e-129	-8.27043	PREDICTED: protein IQ-DOMAIN 1 isoform X2 [Prunus mume]
gene24468	3.51242e-15	Inf	PREDICTED: DNA repair protein recA homolog 3, mitochondrial [Vitis vinifera]
gene21407	3.80654e-120	4.61419	cysteine synthase, putative [Ricinus communis]
gene35249	4.81607e-34	-2.91511	hypothetical protein JCGZ_04489 [Jatropha curcas]
gene26968	8.61451e-196	8.2707	PREDICTED: catalase isozyme 1-like [Vitis vinifera]
gene14344	3.39925e-17	-3.45525	Septum-promoting GTP-binding protein 1 [Morus notabilis]
gene42474	1.54246e-06	-2.07429	hypothetical protein PRUPE_ppa006250mg [Prunus persica]
gene23957	4.71681e-90	-7.59722	PREDICTED: formin-like protein 1-like [Citrus sinensis]
gene25094	1.82011e-14	-2.33915	hypothetical protein POPTR_0014s01910g [Populus trichocarpa]
gene30522	2.30368e-29	#NAME?	PREDICTED: rhodanese-like domain-containing protein 8, chloroplastic isoform X1 [Vitis vinifera]
gene29965	9.5607e-54	-4.77381	PREDICTED: protein WVD2-like 1 isoform X1 [Vitis vinifera]
gene24525	6.75284e-105	-6.06043	DNAJ [Theobroma cacao]
gene27558	2.59086e-65	#NAME?	PREDICTED: uncharacterized protein LOC100264638 isoform X1 [Vitis vinifera]
gene18608	1.51028e-09	#NAME?	hypothetical protein JCGZ_00239 [Jatropha curcas]
gene40932	7.35023e-28	2.58484	PREDICTED: uncharacterized protein LOC104878606 [Vitis vinifera]
gene42193	0.000579881	-2.53859	Receptor kinase 3 isoform 1 [Theobroma cacao]
gene30406	5.40845e-25	2.19565	PREDICTED: cytochrome P450 89A2-like [Nicotiana sylvestris]
gene22117	3.69652e-06	-3.90014	PREDICTED: UPF0496 protein At4g34320-like [Glycine max]
gene12039	7.45399e-07	-2.12772	hypothetical protein PRUPE_ppa002621mg [Prunus persica]
gene13481	1.54381e-23	2.1614	PREDICTED: U-box domain-containing protein 21-like [Prunus mume]
gene27476	5.29283e-51	-3.27491	PREDICTED: calcyclin-binding protein [Vitis vinifera]
gene39414	1.0956e-06	3.84335	PREDICTED: myb-related protein Myb4-like [Populus euphratica]
gene25057	1.21219e-11	#NAME?	hypothetical protein VITISV_017741 [Vitis vinifera]
gene16252	5.85718e-56	2.48496	PREDICTED: putative DNA-binding protein ESCAROLA-like [Fragaria vesca subsp. vesca]
gene30021	1.07201e-11	-4.50885	kinase, putative [Ricinus communis]
gene10116	4.0041e-10	-2.48142	PREDICTED: uncharacterized LOC101208739 isoform 1 [Cucumis sativus]
gene32308	2.948e-27	-4.88192	DUF26 domain-containing protein 1 precursor, putative [Ricinus communis]
gene38572	0.000184411	2.57101	glutaredoxin, grx, putative [Ricinus communis]
gene32757	3.64361e-05	-2.87119	PREDICTED: uncharacterized protein LOC102614771 [Citrus sinensis]
gene5218	2.05362e-176	4.55967	PREDICTED: cytochrome P450 705A20-like [Fragaria vesca subsp. vesca]
gene33197	1.99793e-10	-2.95429	Uncharacterized protein isoform 1 [Theobroma cacao]
gene39830	1.37833e-35	-6.96517	hypothetical protein CISIN_1g016356mg [Citrus sinensis]
gene20990	3.7362e-24	#NAME?	PREDICTED: syntaxin-43-like isoform X1 [Citrus sinensis]
gene35421	4.53959e-10	Inf	hypothetical protein POPTR_0005s05830g [Populus trichocarpa]
gene33507	1.64616e-06	#NAME?	hypothetical protein JCGZ_02225 [Jatropha curcas]
gene24401	2.76644e-32	-3.54301	PREDICTED: uncharacterized protein LOC100250746 [Vitis vinifera]
gene42629	2.35951e-16	2.23597	hypothetical protein glysoja_048132 [Glycine soja]
gene604	1.1936e-36	-4.15997	Uncharacterized protein TCM_041593 [Theobroma cacao]
gene21166	1.82277e-14	-2.75159	PREDICTED: NADP-dependent malic enzyme isoform X1 [Prunus mume]
gene2835	4.0176e-12	-4.5654	hypothetical protein POPTR_0001s37630g, partial [Populus trichocarpa]
gene13826	3.0236e-79	-2.68753	Major Facilitator Superfamily with SPX (SYG1/Pho81/XPR1) domain-containing protein [Theobroma cacao]
gene38400	1.92557e-08	Inf	PREDICTED: nudix hydrolase 15, mitochondrial-like isoform X2 [Populus euphratica]
gene36305	6.47467e-12	2.29834	PREDICTED: solute carrier family 35 member F1-like [Prunus mume]
gene8402	8.64976e-88	2.74542	PREDICTED: probable uridine nucleosidase 2 [Prunus mume]
gene11952	3.10073e-12	-4.46003	PREDICTED: cell wall / vacuolar inhibitor of fructosidase 2-like [Fragaria vesca subsp. vesca]
gene28897	7.03295e-07	-3.34613	prenylated rab acceptor family protein [Populus trichocarpa]
gene25043	3.6295e-06	-5.43336	hypothetical protein PRUPE_ppa022833mg [Prunus persica]
gene37621	1.6085e-18	2.33812	PREDICTED: uncharacterized protein At4g00950 [Prunus mume]
gene30228	9.26899e-05	-3.61286	unknown [Picea sitchensis]
gene31539	2.34954e-08	-5.96617	PREDICTED: syntaxin-124 [Cucumis melo]
gene21512	5.60115e-19	-8.29191	PREDICTED: serine carboxypeptidase-like 18 [Vitis vinifera]
gene24466	5.12242e-08	2.35295	Late embryogenesis abundant hydroxyproline-rich glycofamily protein, putative [Theobroma cacao]
gene35326	5.04827e-06	2.4417	PREDICTED: uncharacterized protein LOC100243388 [Vitis vinifera]
gene1021	8.94432e-48	2.19653	Outer arm dynein light chain 1 protein, putative isoform 1 [Theobroma cacao]
gene19064	5.43525e-21	8.22301	PREDICTED: signal recognition particle 54 kDa protein, chloroplastic [Prunus mume]
gene14592	1.42283e-16	-9.0445	PREDICTED: uncharacterized protein LOC101298363 [Fragaria vesca subsp. vesca]
gene33082	7.2311e-05	-3.06546	PREDICTED: probable polygalacturonase [Malus domestica]
gene7709	6.82867e-32	-2.3173	PREDICTED: L-ascorbate oxidase homolog [Malus domestica]
gene11033	1.70194e-11	-5.34231	PREDICTED: cytochrome P450 71D8-like [Cicer arietinum]
gene22725	2.69329e-16	-3.0817	PREDICTED: arogenate dehydratase/prephenate dehydratase 1, chloroplastic [Prunus mume]
gene4933	1.9505e-13	2.89587	PREDICTED: uncharacterized protein LOC100245494 [Vitis vinifera]
gene33474	2.2842e-06	-4.19498	hypothetical protein CISIN_1g043984mg [Citrus sinensis]
gene20147	4.44656e-11	#NAME?	PREDICTED: uncharacterized endoplasmic reticulum membrane protein C16E8.02-like [Fragaria vesca subsp. vesca]
gene34873	1.97656e-40	-3.92492	hypothetical protein CICLE_v10014639mg [Citrus clementina]
gene25082	5.35357e-31	#NAME?	PREDICTED: protein RER1A [Tarenaya hassleriana]
gene26270	4.9234e-08	#NAME?	PREDICTED: peroxidase 64-like [Citrus sinensis]
gene7653	5.17417e-06	-3.01744	PREDICTED: probable LRR receptor-like serine/threonine-protein kinase At1g63430 [Prunus mume]
gene24153	2.89351e-11	-2.40322	PREDICTED: cysteine-rich receptor-like protein kinase 2 [Vitis vinifera]
gene32183	3.02147e-05	-2.29674	PREDICTED: receptor-like protein kinase FERONIA [Vitis vinifera]
gene22406	2.21411e-172	-4.39484	hypothetical protein PRUPE_ppa021513mg [Prunus persica]
gene31304	4.49156e-14	-2.04026	PREDICTED: phosphatidylinositol/phosphatidylcholine transfer protein SFH3 [Prunus mume]
gene28949	2.79642e-17	Inf	Glutathione peroxidase 6 [Theobroma cacao]
gene40820	3.26369e-85	-5.51055	hypothetical protein JCGZ_12276 [Jatropha curcas]
gene30218	5.14754e-10	Inf	PREDICTED: probable peptide transporter At1g52190-like isoform X4 [Citrus sinensis]
gene30722	3.36584e-11	2.83424	PREDICTED: protein kinase APK1A, chloroplastic [Nelumbo nucifera]
Walnut_newGene_4458	2.34286e-13	Inf	Strong similarity to gi|3600044 T12H20.12 protease homolog from Arabidopsis thaliana BAC gb|AF080119 and is a member of the reverse transcriptase family PF|00078 [Arabidopsis thaliana]
gene25357	2.25271e-07	-4.89764	PREDICTED: NADPH-dependent 1-acyldihydroxyacetone phosphate reductase-like [Fragaria vesca subsp. vesca]
gene20091	8.03975e-100	Inf	unknown [Lotus japonicus]
gene1738	8.37039e-19	-2.41452	PREDICTED: probable phytol kinase 1, chloroplastic isoform X1 [Prunus mume]
gene22622	9.52805e-05	3.66706	PREDICTED: transcription factor JUNGBRUNNEN 1-like [Nelumbo nucifera]
gene26107	0.000108776	-4.19102	PREDICTED: uncharacterized protein LOC100246465 [Vitis vinifera]
gene113	6.95358e-73	-3.41945	Salicylate O-methyltransferase [Theobroma cacao]
gene14423	1.13651e-37	2.04222	PREDICTED: selenium-binding protein 2-like [Malus domestica]
gene39645	1.83225e-34	-2.34654	Photosystem I reaction center subunit PSI [Theobroma cacao]
gene41838	2.30433e-49	2.72131	LRR receptor-like serine/threonine-protein kinase RFK1, putative [Theobroma cacao]
gene24865	7.86979e-83	3.31171	unnamed protein product [Vitis vinifera]
gene22425	9.45326e-05	2.78831	Alpha-N-arabinofuranosidase 1 precursor, putative [Ricinus communis]
gene914	5.12601e-11	-2.3889	PREDICTED: inactive leucine-rich repeat receptor-like serine/threonine-protein kinase At1g60630 [Vitis vinifera]
gene13886	2.27965e-20	-5.28773	hypothetical protein JCGZ_09256 [Jatropha curcas]
gene8595	8.43308e-06	-3.96698	hypothetical protein CICLE_v10005065mg [Citrus clementina]
gene20539	2.66289e-52	2.0827	PREDICTED: vacuolar-sorting receptor 6-like [Pyrus x bretschneideri]
Walnut_newGene_3948	4.89089e-31	#NAME?	ABC transporter C family member 2 [Morus notabilis]
gene38351	1.40529e-16	-4.50744	PREDICTED: bidirectional sugar transporter SWEET17 isoform X1 [Vitis vinifera]
gene5237	3.98621e-55	3.24685	PREDICTED: E3 ubiquitin ligase BIG BROTHER-like isoform X1 [Citrus sinensis]
gene42997	3.68045e-08	5.86824	conserved hypothetical protein [Ricinus communis]
gene26383	1.75616e-229	-11.9651	plasma intrinsic protein 2,1 [Juglans regia]
gene3471	1.93142e-16	3.37999	hypothetical protein JCGZ_15323 [Jatropha curcas]
gene8727	4.45279e-09	-3.78518	Nuclear transport factor 2 family protein, putative [Theobroma cacao]
gene12686	1.21906e-25	#NAME?	PREDICTED: GDSL esterase/lipase At5g45670-like [Malus domestica]
gene12148	0.000200846	-3.12991	PREDICTED: ankyrin-3 [Prunus mume]
gene993	1.80316e-55	5.20523	PREDICTED: 1-aminocyclopropane-1-carboxylate oxidase homolog 1-like [Pyrus x bretschneideri]
gene17201	7.05759e-63	#NAME?	hypothetical protein JCGZ_09872 [Jatropha curcas]
Walnut_newGene_3307	4.72116e-20	#NAME?	PREDICTED: F-box/kelch-repeat protein At1g55270-like [Pyrus x bretschneideri]
gene34407	8.04229e-21	-4.11535	unknown [Medicago truncatula]
gene18691	2.31267e-05	2.52645	Phosphoribosyl pyrophosphate (PRPP) synthase 3 isoform 3 [Theobroma cacao]
gene20959	3.23862e-35	-6.21293	hypothetical protein PRUPE_ppa003769mg [Prunus persica]
gene2489	0.000135752	-2.86858	PREDICTED: uncharacterized protein LOC100258054 [Vitis vinifera]
gene12982	3.10029e-18	-7.94764	PREDICTED: microsomal glutathione S-transferase 3 [Camelina sativa]
gene17444	1.02512e-09	#NAME?	PREDICTED: dynein light chain LC6, flagellar outer arm-like [Malus domestica]
gene1526	4.27235e-190	4.61265	Cytochrome C oxidase copper chaperone isoform 1 [Theobroma cacao]
Walnut_newGene_4660	1.46885e-33	7.55002	unnamed protein product [Vitis vinifera]
gene21395	4.00374e-43	Inf	PREDICTED: very-long-chain (3R)-3-hydroxyacyl-[acyl-carrier protein] dehydratase PASTICCINO 2A [Prunus mume]
gene39235	2.38337e-12	#NAME?	peroxidase [Dimocarpus longan]
gene148	4.77729e-10	5.74305	hypothetical protein PRUPE_ppa010894mg [Prunus persica]
gene37159	8.03055e-06	-2.87313	hypothetical protein PRUPE_ppa018626mg [Prunus persica]
gene22246	5.45547e-181	5.6885	Auxin-responsive GH3 family protein [Theobroma cacao]
gene5185	9.25118e-29	#NAME?	PREDICTED: uncharacterized protein LOC104222351 [Nicotiana sylvestris]
Walnut_newGene_5665	4.94069e-47	-8.57412	PREDICTED: proton-coupled amino acid transporter 3-like [Cucumis melo]
gene42157	1.4626e-88	-3.2569	PREDICTED: heat shock cognate 70 kDa protein 2 [Glycine max]
gene6789	7.13984e-11	-3.03129	PREDICTED: metacaspase-1-like [Fragaria vesca subsp. vesca]
gene5615	3.14011e-45	-2.11437	Transmembrane protein 87A [Morus notabilis]
gene6766	4.79942e-27	2.08982	PREDICTED: probable WRKY transcription factor 4-like isoform X1 [Citrus sinensis]
gene16202	1.17016e-10	-3.45503	PREDICTED: pathogenesis-related protein 5-like [Pyrus x bretschneideri]
gene38573	7.30704e-09	2.19214	PREDICTED: monothiol glutaredoxin-S2-like [Glycine max]
gene13729	2.02884e-239	#NAME?	hypothetical protein CICLE_v10020315mg [Citrus clementina]
gene5355	6.85781e-05	-2.6333	Chromomethylase 1, putative isoform 1 [Theobroma cacao]
gene10654	4.43583e-09	-3.07985	Growth-regulating factor 7, putative isoform 1 [Theobroma cacao]
gene24632	3.39365e-58	-8.86849	hypothetical protein PHAVU_011G043300g [Phaseolus vulgaris]
gene15641	1.30038e-125	-13.5821	Protein HOTHEAD [Morus notabilis]
gene37819	3.94991e-06	-2.92204	LIGULELESS1 protein, putative [Theobroma cacao]
gene20559	1.05044e-07	-5.12994	PREDICTED: pathogenesis-related protein 1-like [Tarenaya hassleriana]
gene27351	4.30553e-11	-6.82453	hypothetical protein POPTR_0003s09430g [Populus trichocarpa]
gene35914	1.3645e-12	-7.1484	PREDICTED: uncharacterized protein LOC100853541 [Vitis vinifera]
gene17052	9.24681e-14	-3.65249	hypothetical protein PRUPE_ppa026569mg [Prunus persica]
gene18078	6.85282e-15	-5.23097	hypothetical protein PRUPE_ppa001689mg [Prunus persica]
gene1563	2.75345e-21	2.23143	PREDICTED: stem-specific protein TSJT1-like [Cicer arietinum]
gene35317	1.4831e-08	Inf	PREDICTED: uncharacterized protein LOC104880556 [Vitis vinifera]
gene17579	0.000917224	-3.16261	PREDICTED: uncharacterized protein LOC101298975 [Fragaria vesca subsp. vesca]
gene31425	1.05687e-19	3.44374	hypothetical protein JCGZ_20454 [Jatropha curcas]
gene1309	2.2615e-28	-2.89444	hypothetical protein JCGZ_20721 [Jatropha curcas]
gene4876	2.79622e-20	#NAME?	hypothetical protein JCGZ_15984 [Jatropha curcas]
gene22607	3.60959e-13	-4.42926	class III peroxidase [Populus trichocarpa]
gene11417	7.47418e-08	-3.50622	Cytochrome P450, family 81, subfamily K, polypeptide 2, putative [Theobroma cacao]
gene7642	4.00005e-12	-2.08894	PREDICTED: neutral ceramidase [Populus euphratica]
gene38274	3.6876e-25	2.1374	WRKY DNA-binding protein 48, putative isoform 1 [Theobroma cacao]
Walnut_newGene_5150	2.25532e-14	Inf	potassium channel [Vicia faba]
gene3842	6.42582e-05	-3.21077	hypothetical protein PRUPE_ppa022290mg [Prunus persica]
gene29019	7.83162e-08	3.24162	PREDICTED: uncharacterized protein LOC100253093 [Vitis vinifera]
gene40551	2.46325e-75	-2.96755	PREDICTED: pollen-specific protein C13 [Prunus mume]
gene14382	0.000256355	-2.04382	early-responsive to dehydration family protein [Populus trichocarpa]
gene24932	3.54918e-12	3.31266	PREDICTED: L-type lectin-domain containing receptor kinase IV.1 [Vitis vinifera]
Walnut_newGene_1147	3.01882e-06	-3.80344	PREDICTED: cytokinin riboside 5&apos;-monophosphate phosphoribohydrolase LOG5 [Prunus mume]
gene10718	0.000512264	-2.47406	PREDICTED: probable LRR receptor-like serine/threonine-protein kinase At3g47570 isoform X2 [Populus euphratica]
gene4775	1.79887e-26	2.53544	WRKY18 transcription factor [Vitis amurensis]
gene27278	1.1498e-16	-5.43665	Somatic embryogenesis receptor-like kinase 2 isoform 1 [Theobroma cacao]
gene16810	1.1977e-71	2.67049	PREDICTED: transcription factor bHLH113 isoform X1 [Prunus mume]
gene34215	1.39933e-08	-6.06276	Uncharacterized protein TCM_029490 [Theobroma cacao]
gene27809	2.32786e-44	3.43321	PREDICTED: uncharacterized protein LOC103335056 [Prunus mume]
gene28833	1.74413e-17	-2.58125	Glutamate receptor 3.6 [Morus notabilis]
gene4060	0.000357583	-2.39822	PREDICTED: GPI-anchored protein LORELEI-like [Populus euphratica]
gene29867	2.0361e-35	-2.3687	PREDICTED: protein trichome birefringence [Prunus mume]
gene8913	3.25987e-12	-2.00718	Cation/H+ exchanger 18 [Theobroma cacao]
gene27878	1.51334e-09	-2.05451	PREDICTED: LOW QUALITY PROTEIN: phosphoinositide phospholipase C 4-like [Malus domestica]
gene22071	2.19109e-20	Inf	hypothetical protein JCGZ_05584 [Jatropha curcas]
gene38696	7.24239e-26	-3.07882	hypothetical protein JCGZ_00402 [Jatropha curcas]
gene33035	1.41607e-39	-3.17878	PREDICTED: ras-related protein RABD1-like [Citrus sinensis]
Walnut_newGene_5500	9.62202e-10	Inf	hypothetical protein EUGRSUZ_B00972 [Eucalyptus grandis]
gene138	1.02989e-15	-2.64651	PREDICTED: serine/threonine-protein kinase rio2-like isoform X1 [Malus domestica]
gene37048	5.04117e-79	-2.5871	plasma intrinsic protein 2;5 [Juglans regia]
Walnut_newGene_4396	1.23084e-10	-3.02148	LMBR1-like membrane protein isoform 2 [Theobroma cacao]
gene25544	2.84856e-16	-2.12513	PREDICTED: transcription repressor MYB4-like [Nelumbo nucifera]
gene30972	0.000222691	-2.85562	Targeting protein for XKLP2, putative isoform 4 [Theobroma cacao]
gene40880	1.04654e-19	-3.61649	hypothetical protein PRUPE_ppa000194mg [Prunus persica]
gene13516	4.3498e-38	4.92381	hypothetical protein PRUPE_ppa008527mg [Prunus persica]
gene21581	2.33267e-06	-3.31608	unnamed protein product [Vitis vinifera]
gene7025	8.85226e-15	2.32674	Insulinase (Peptidase family M16) family protein isoform 1 [Theobroma cacao]
gene31084	5.20628e-16	-6.80253	Cytochrome P450 [Morus notabilis]
gene27547	4.16713e-43	2.51241	Aluminum-activated malate transporter 9 [Theobroma cacao]
gene41363	1.21485e-12	-6.68707	Cytochrome P450, family 86, subfamily B, polypeptide 1 isoform 1 [Theobroma cacao]
gene24954	1.45426e-14	-3.75209	PREDICTED: dirigent protein 2-like [Prunus mume]
gene35905	3.61304e-34	#NAME?	PREDICTED: mavicyanin [Malus domestica]
gene23609	2.94947e-46	9.48138	hypothetical protein CISIN_1g001897mg [Citrus sinensis]
gene11148	9.97837e-05	-2.31217	PREDICTED: kinesin-3 [Prunus mume]
gene9619	4.7103e-14	-4.15319	PREDICTED: polygalacturonase QRT3 [Prunus mume]
gene30206	5.37321e-10	#NAME?	glycogenin, putative [Ricinus communis]
gene24207	3.02928e-42	5.8069	PREDICTED: glutamate receptor 2.7-like [Cicer arietinum]
Walnut_newGene_6846	3.12804e-07	-3.42499	--
gene11883	5.44643e-07	2.54973	Mitogen-activated protein kinase kinase kinase ANP1 [Morus notabilis]
gene21840	1.3847e-246	5.48731	hypothetical protein JCGZ_16170 [Jatropha curcas]
gene6960	7.81905e-06	3.47866	PREDICTED: wall-associated receptor kinase-like 22 [Prunus mume]
gene12279	1.46244e-11	-2.76189	NHL domain-containing protein isoform 2 [Theobroma cacao]
gene20342	1.01177e-10	Inf	Dihydroflavonol 4-reductase, partial [Medicago truncatula]
gene22525	7.11566e-28	-2.32138	PREDICTED: uncharacterized protein LOC100258677 [Vitis vinifera]
gene37160	0.000188884	-2.50968	hypothetical protein CISIN_1g042753mg [Citrus sinensis]
gene12072	8.99435e-36	-3.32347	PREDICTED: filament-like plant protein 7 [Prunus mume]
gene14243	1.03152e-07	-2.27179	RING/U-box superfamily protein, putative [Theobroma cacao]
gene21126	7.41774e-62	-2.23478	Calreticulin [Glycine soja]
gene31197	1.15562e-25	-2.76828	PREDICTED: L-ascorbate oxidase-like [Citrus sinensis]
gene27497	1.07774e-06	4.30676	PREDICTED: serine carboxypeptidase-like 31 [Prunus mume]
gene8586	5.22011e-08	-3.49463	PREDICTED: U-box domain-containing protein 4 [Malus domestica]
Walnut_newGene_247	1.94631e-31	#NAME?	hypothetical protein PRUPE_ppa024740mg [Prunus persica]
gene6147	5.70385e-106	-3.05681	Auxin efflux carrier component 3 [Morus notabilis]
gene41144	1.37723e-25	Inf	aldehyde dehydrogenase, putative [Ricinus communis]
gene34217	1.41685e-25	-4.25721	inward rectifying potassium channel [Vitis vinifera]
gene13048	1.41172e-47	-2.02889	PREDICTED: uncharacterized protein LOC105111864 [Populus euphratica]
gene14864	2.36404e-06	4.12991	putative adenine nucleotide translocase [Castanea sativa]
gene24076	7.42733e-14	-5.823	Squalene monooxygenase, putative [Ricinus communis]
gene32549	2.15707e-82	-13.3703	GAST1 protein precursor, putative [Ricinus communis]
gene16033	4.67567e-52	-2.39988	unknown [Lotus japonicus]
gene26666	1.51966e-07	#NAME?	hypothetical protein EUGRSUZ_D00174 [Eucalyptus grandis]
gene5782	2.52259e-05	-3.1469	PREDICTED: casparian strip membrane protein POPTRDRAFT_763057-like [Citrus sinensis]
gene40944	3.02043e-08	-2.13363	Eukaryotic aspartyl protease family protein isoform 1 [Theobroma cacao]
gene7641	1.66956e-49	3.51371	duf246 domain-containing protein, partial [Morella rubra]
Walnut_newGene_6580	2.41131e-06	3.42903	hypothetical protein PRUPE_ppa1027179mg, partial [Prunus persica]
gene13844	8.36134e-19	Inf	PREDICTED: KH domain-containing protein At4g18375-like [Malus domestica]
gene12664	3.0937e-09	-3.0827	hypothetical protein PRUPE_ppa012864mg [Prunus persica]
gene5553	2.08782e-07	4.89255	PREDICTED: proline dehydrogenase 2, mitochondrial-like [Fragaria vesca subsp. vesca]
gene39048	1.02247e-08	-3.83083	Uncharacterized protein TCM_034025 [Theobroma cacao]
gene17190	1.83079e-51	#NAME?	PREDICTED: probable mannitol dehydrogenase [Pyrus x bretschneideri]
gene6969	5.71754e-63	4.82637	PREDICTED: LRR receptor-like serine/threonine-protein kinase GSO1 isoform X5 [Vitis vinifera]
gene21971	1.61713e-10	3.48328	DNA repair metallo-beta-lactamase family protein, putative isoform 1 [Theobroma cacao]
gene14964	8.1679e-05	-3.44159	hypothetical protein CICLE_v10001335mg [Citrus clementina]
gene29494	8.37185e-09	-6.15022	hypothetical protein CISIN_1g000630mg [Citrus sinensis]
gene2838	1.27813e-232	-5.33287	hypothetical protein JCGZ_01027 [Jatropha curcas]
gene16451	2.2036e-09	#NAME?	F6D8.25 [Theobroma cacao]
Walnut_newGene_6696	2.69621e-18	#NAME?	--
gene8883	3.16505e-25	-7.45681	Early nodulin-like protein 17 [Theobroma cacao]
gene27096	1.0359e-10	4.53936	PREDICTED: crocetin glucosyltransferase, chloroplastic-like [Vitis vinifera]
gene3149	1.34219e-35	-3.13645	PREDICTED: NADPH:quinone oxidoreductase [Vitis vinifera]
gene15943	5.31833e-90	#NAME?	PREDICTED: laccase-14-like [Eucalyptus grandis]
gene5569	6.40371e-46	4.40778	PREDICTED: protein NDR1-like [Fragaria vesca subsp. vesca]
gene13487	3.75784e-92	-6.31179	PREDICTED: wall-associated receptor kinase 2-like [Malus domestica]
gene28044	2.412e-09	-4.79617	PREDICTED: LOW QUALITY PROTEIN: beta-galactosidase 6-like, partial [Fragaria vesca subsp. vesca]
gene11127	3.85765e-10	4.33859	hypothetical protein JCGZ_11855 [Jatropha curcas]
gene13256	0.00093304	-3.42358	hypothetical protein POPTR_0014s098101g, partial [Populus trichocarpa]
gene28932	1.91759e-11	-3.87018	PREDICTED: uncharacterized protein LOC101211886 [Cucumis sativus]
gene23129	2.62735e-43	6.79021	Major facilitator superfamily protein [Theobroma cacao]
gene26683	2.95933e-06	-2.32193	hypothetical protein PRUPE_ppa001135mg [Prunus persica]
gene7030	2.50074e-07	-2.77222	BRASSINOSTEROID INSENSITIVE 1-associated receptor kinase 1 precursor, putative [Ricinus communis]
gene16578	8.32097e-12	#NAME?	PREDICTED: probable pectinesterase/pectinesterase inhibitor 60 [Prunus mume]
gene20870	5.08555e-231	5.17314	PREDICTED: uncharacterized protein LOC104452338 [Eucalyptus grandis]
gene42119	2.13946e-19	-3.37823	Rho GTPase activating protein with PAK-box/P21-Rho-binding domain [Theobroma cacao]
gene27867	1.25953e-11	-4.04321	PREDICTED: uncharacterized protein LOC100265827 isoform X3 [Vitis vinifera]
Walnut_newGene_381	5.63622e-28	-6.89658	hypothetical protein VITISV_039530 [Vitis vinifera]
gene4454	6.98812e-70	2.53128	Lysosomal Pro-X carboxypeptidase [Gossypium arboreum]
gene9717	4.66009e-89	-5.52848	hypothetical protein CICLE_v10027716mg [Citrus clementina]
gene34992	1.06729e-12	-2.97054	PREDICTED: probable inactive purple acid phosphatase 27 [Prunus mume]
gene13438	6.92174e-20	-3.90877	hypothetical protein PRUPE_ppa001414mg [Prunus persica]
gene6567	1.52208e-23	3.58773	Alpha/beta-Hydrolases superfamily protein [Theobroma cacao]
gene1711	2.39125e-19	-7.1617	PREDICTED: uncharacterized protein LOC100262498 [Vitis vinifera]
gene29780	1.11019e-31	#NAME?	PREDICTED: transcription factor MYB12 [Prunus mume]
Walnut_newGene_4142	3.11161e-10	Inf	PREDICTED: uncharacterized protein LOC105167219 [Sesamum indicum]
gene40307	5.14396e-74	#NAME?	PREDICTED: uncharacterized protein LOC103418351 [Malus domestica]
gene1379	1.88273e-09	-6.48387	PREDICTED: adenine phosphoribosyltransferase 3 [Vitis vinifera]
gene12448	1.35918e-36	-5.06114	PREDICTED: dehydration-responsive protein RD22-like [Citrus sinensis]
gene37844	2.95446e-28	-2.40494	hypothetical protein JCGZ_09467 [Jatropha curcas]
gene21404	0.000304322	2.21289	C2H2-like zinc finger protein, putative [Theobroma cacao]
gene35050	2.26459e-179	-5.46862	PREDICTED: pathogenesis-related protein PR-1 [Populus euphratica]
gene23813	0.000596485	-8.88123	xyloglucan endotransglucosylase/hydrolase [Gossypium hirsutum]
gene20032	1.1124e-28	#NAME?	GH3-1 [Quercus robur]
gene43288	9.1822e-17	-6.89532	PREDICTED: probable transmembrane ascorbate ferrireductase 4 [Malus domestica]
gene32938	1.0006e-13	#NAME?	zinc finger protein, putative [Ricinus communis]
gene32388	3.35192e-22	-3.59991	PREDICTED: non-specific lipid-transfer protein 2-like [Glycine max]
gene22937	1.21039e-62	2.6821	PREDICTED: glutathione transferase GST 23 [Vitis vinifera]
gene14136	0.000108222	-3.38507	PREDICTED: probable LRR receptor-like serine/threonine-protein kinase At1g34110 [Prunus mume]
gene24543	9.02421e-07	-2.02872	PREDICTED: probably inactive leucine-rich repeat receptor-like protein kinase At2g25790 [Vitis vinifera]
gene21649	1.95626e-15	-5.28964	putative phosphatidylinositol 4-kinase type 2-beta [Morus notabilis]
gene29581	5.72266e-23	7.44988	PREDICTED: uncharacterized protein LOC103436635 [Malus domestica]
gene27703	5.70265e-06	2.50082	Calcium-binding EF-hand family protein [Theobroma cacao]
Walnut_newGene_1409	2.49799e-09	#NAME?	--
gene17045	6.99431e-10	-3.29984	Wall-associated kinase 2, putative [Theobroma cacao]
gene23808	2.54557e-41	Inf	hypothetical protein JCGZ_16486 [Jatropha curcas]
gene38326	5.22181e-45	3.45127	Bet v 1 allergen [Quercus suber]
gene30638	1.46714e-44	-2.1672	PREDICTED: uncharacterized protein LOC103343395 [Prunus mume]
gene6011	2.7667e-148	3.76268	Leucine-rich repeat protein kinase family protein isoform 1 [Theobroma cacao]
gene26341	9.68504e-50	2.25739	short-chain dehydrogenase/reductase family protein [Populus trichocarpa]
gene8316	1.01535e-06	-2.58925	JAZ2 [Hevea brasiliensis]
gene39221	8.66853e-05	-2.66652	hypothetical protein PRUPE_ppa000888mg [Prunus persica]
gene16968	6.86203e-24	-4.10077	hypothetical protein JCGZ_20554 [Jatropha curcas]
gene42780	4.49327e-13	-3.86394	PREDICTED: spermidine hydroxycinnamoyl transferase [Nelumbo nucifera]
gene13766	1.99721e-12	-5.81441	PREDICTED: uncharacterized protein LOC100242579 isoform X1 [Vitis vinifera]
gene11418	8.48175e-20	2.77986	Cytochrome P450, family 81, subfamily K, polypeptide 2, putative [Theobroma cacao]
gene7463	2.18515e-08	-4.63801	PREDICTED: 1,4-Dihydroxy-2-naphthoyl-CoA synthase, peroxisomal-like [Malus domestica]
gene22840	3.4043e-120	-3.2958	conserved hypothetical protein [Ricinus communis]
gene8397	7.00556e-11	-5.59326	Late embryogenesis abundant protein Lea14-A, putative [Ricinus communis]
gene21666	1.80936e-19	7.17791	PREDICTED: wall-associated receptor kinase-like 22 [Prunus mume]
gene39768	2.68207e-11	-2.64267	PREDICTED: probable carbohydrate esterase At4g34215 [Eucalyptus grandis]
gene34163	4.0665e-78	#NAME?	PREDICTED: tyrosine/DOPA decarboxylase 2-like [Nelumbo nucifera]
gene26569	3.9486e-18	7.94589	PREDICTED: cytochrome P450 93A1-like [Fragaria vesca subsp. vesca]
gene31557	1.37416e-19	4.63157	PREDICTED: glyoxysomal fatty acid beta-oxidation multifunctional protein MFP-a [Vitis vinifera]
gene42365	1.18763e-05	-3.71852	16.6 kDa heat shock protein [Glycine soja]
gene8261	1.33598e-07	3.43949	PREDICTED: uncharacterized protein LOC103699645, partial [Phoenix dactylifera]
gene1569	7.76521e-87	-3.61333	PREDICTED: dentin sialophosphoprotein [Prunus mume]
gene42282	6.44048e-14	-6.76271	PREDICTED: snakin-2-like [Prunus mume]
gene3486	9.16976e-48	-2.26791	hypothetical protein PRUPE_ppa000375mg [Prunus persica]
gene16257	0.000562693	2.14381	PREDICTED: uncharacterized protein LOC101205646 [Cucumis sativus]
gene33630	6.53276e-06	-4.63364	Cytochrome b5 isoform 1 [Morus notabilis]
Walnut_newGene_7323	4.93099e-22	#NAME?	galactose oxidase/kelch repeat protein [Medicago truncatula]
gene23350	1.36051e-42	-3.30848	PREDICTED: uncharacterized protein LOC103455821 [Malus domestica]
gene40065	1.1502e-07	2.99881	Leucine-rich repeat protein kinase family protein, putative [Theobroma cacao]
gene38622	2.35424e-43	#NAME?	phospholipid/glycerol acyltransferase family protein [Populus trichocarpa]
gene11140	1.40325e-14	#NAME?	hypothetical protein CISIN_1g047565mg [Citrus sinensis]
gene41559	2.82501e-06	-2.92513	hypothetical protein JCGZ_03767 [Jatropha curcas]
gene16390	1.44041e-12	#NAME?	Alpha/beta-Hydrolases superfamily protein [Theobroma cacao]
gene21811	2.33956e-38	4.46564	PREDICTED: G-type lectin S-receptor-like serine/threonine-protein kinase CES101 [Prunus mume]
gene10827	1.80696e-05	-3.4681	PREDICTED: cyclin-dependent kinase B2-2 [Eucalyptus grandis]
gene16192	2.32773e-11	-2.2793	PREDICTED: UDP-glycosyltransferase 74E2-like [Vitis vinifera]
gene27884	3.986e-81	2.6288	PREDICTED: probable aldo-keto reductase 2 [Prunus mume]
gene34101	1.90484e-25	-2.86228	hypothetical protein JCGZ_05516 [Jatropha curcas]
gene15636	1.50205e-08	-5.99125	PREDICTED: gibberellin 2-beta-dioxygenase 8-like [Pyrus x bretschneideri]
gene1097	2.17932e-38	-2.91001	PREDICTED: U-box domain-containing protein 11 [Vitis vinifera]
gene12151	1.09388e-25	4.28258	Uncharacterized protein isoform 3 [Theobroma cacao]
gene25056	9.38963e-44	#NAME?	Subtilisin-like serine endopeptidase family protein, putative isoform 2, partial [Theobroma cacao]
gene10342	3.54164e-12	4.1062	PREDICTED: leucoanthocyanidin dioxygenase-like isoform X1 [Populus euphratica]
gene23159	6.54008e-09	-4.31436	Growth-regulating factor 1 [Theobroma cacao]
gene13550	7.3029e-22	-4.68431	cellulose synthase [Betula luminifera]
gene10390	5.9705e-09	2.68737	hypothetical protein PRUPE_ppa001595mg [Prunus persica]
gene6687	1.28764e-07	-4.65475	PREDICTED: uncharacterized protein At3g27210 isoform X1 [Vitis vinifera]
gene39344	4.27479e-48	#NAME?	PREDICTED: probable pectate lyase 15-like [Fragaria vesca subsp. vesca]
gene21312	1.91857e-13	-5.21763	PREDICTED: linoleate 9S-lipoxygenase 6 [Vitis vinifera]
gene26475	1.69957e-38	-6.25573	PREDICTED: aquaporin PIP1;2 isoform X1 [Vitis vinifera]
gene37012	4.76676e-10	#NAME?	ACT-like protein tyrosine kinase family protein isoform 3, partial [Theobroma cacao]
gene14599	2.04329e-84	-6.28986	hypothetical protein JCGZ_08722 [Jatropha curcas]
gene42213	3.68599e-10	-4.45994	lipase family protein [Populus trichocarpa]
Walnut_newGene_3543	1.68541e-05	-2.09809	hypothetical protein PHAVU_005G134800g [Phaseolus vulgaris]
gene23028	2.55326e-09	3.27347	PREDICTED: receptor-like protein 12 [Prunus mume]
gene40723	8.00638e-13	2.15441	hypothetical protein L484_017004 [Morus notabilis]
Walnut_newGene_377	1.43554e-18	2.61356	hypothetical protein CISIN_1g002719mg [Citrus sinensis]
gene22834	1.00635e-110	-4.37049	PREDICTED: 17.3 kDa class I heat shock protein-like [Nelumbo nucifera]
gene23282	1.8229e-05	-4.43615	hypothetical protein JCGZ_25104 [Jatropha curcas]
gene26294	9.06568e-08	3.54361	PREDICTED: uncharacterized protein LOC103502365 [Cucumis melo]
gene39437	1.44582e-46	-2.06214	hypothetical protein POPTR_0002s03810g [Populus trichocarpa]
gene41060	9.17198e-05	2.21528	PREDICTED: NAC domain-containing protein 89-like [Citrus sinensis]
gene38845	8.59502e-174	4.18003	putative polyol transporter 6 [Morus notabilis]
Walnut_newGene_6293	0.000805385	-2.08127	hypothetical protein F383_08167 [Gossypium arboreum]
gene20188	1.14261e-07	-4.67861	PREDICTED: uncharacterized membrane protein At1g06890-like [Pyrus x bretschneideri]
gene6219	3.06399e-29	-2.45721	Uncharacterized protein isoform 1 [Theobroma cacao]
gene31558	1.22516e-18	-2.48069	dynein light chain [Morella rubra]
gene35858	2.3693e-10	-3.77634	Lateral root primordium protein-related, putative [Theobroma cacao]
gene22388	0.000516271	-4.41588	PREDICTED: alpha-L-arabinofuranosidase 1-like [Prunus mume]
gene15875	2.37357e-21	2.08344	BZIP transcription factor family protein isoform 1 [Theobroma cacao]
gene1638	5.05895e-41	2.26928	hypothetical protein PRUPE_ppa003853mg [Prunus persica]
gene42238	9.96399e-14	-5.07755	Metalloendoproteinase 1 precursor, putative [Ricinus communis]
gene26955	9.93486e-15	-5.78092	PREDICTED: L-ascorbate peroxidase 3, peroxisomal [Solanum lycopersicum]
gene14002	1.07284e-06	3.10159	hypothetical protein PRUPE_ppa004012mg [Prunus persica]
gene24767	1.04771e-06	-6.1282	Uncharacterized protein L484_008883 [Morus notabilis]
gene704	5.62089e-89	-2.75252	Uncharacterized protein isoform 1 [Theobroma cacao]
gene5518	1.10919e-09	-5.27177	PREDICTED: short-chain dehydrogenase reductase 2a-like [Citrus sinensis]
gene34840	0.00010465	-4.72414	PREDICTED: putative white-brown complex homolog protein 30 [Vitis vinifera]
gene8683	6.66421e-07	-3.486	hypothetical protein PRUPE_ppa001119mg [Prunus persica]
gene4911	4.72995e-06	5.828	hypothetical protein PRUPE_ppa023217mg [Prunus persica]
gene36310	1.06861e-82	-9.29473	PREDICTED: GDSL esterase/lipase At3g26430 [Nelumbo nucifera]
gene33515	6.40628e-90	2.90898	PREDICTED: perakine reductase [Vitis vinifera]
gene29302	0.000331857	-3.58466	hypothetical protein CICLE_v10012017mg [Citrus clementina]
gene39056	6.50009e-07	-2.53086	hypothetical protein PRUPE_ppa012838mg [Prunus persica]
gene6328	1.11818e-05	-3.22157	hypothetical protein PHAVU_007G226200g [Phaseolus vulgaris]
gene39073	2.79755e-103	5.17218	PREDICTED: uncharacterized protein LOC101206368 [Cucumis sativus]
gene897	2.50441e-71	2.75511	Metallo-beta-lactamase family protein isoform 1 [Theobroma cacao]
gene14107	1.42752e-07	-3.60644	PREDICTED: uncharacterized protein LOC105130684 isoform X1 [Populus euphratica]
gene17257	2.07363e-05	#NAME?	hypothetical protein PRUPE_ppa003296mg [Prunus persica]
gene23521	3.12202e-28	2.08592	PREDICTED: metal-nicotianamine transporter YSL1-like [Pyrus x bretschneideri]
gene41249	5.17831e-10	#NAME?	PREDICTED: putative UPF0481 protein At3g02645 [Malus domestica]
gene20621	3.81382e-58	Inf	hypothetical protein PHAVU_006G065100g [Phaseolus vulgaris]
gene42017	3.55988e-07	-4.29171	PREDICTED: probable 1-deoxy-D-xylulose-5-phosphate synthase 2, chloroplastic [Vitis vinifera]
Walnut_newGene_121	1.00515e-09	4.26687	Nicotinate-nucleotide pyrophosphorylase [carboxylating], putative [Ricinus communis]
gene6298	3.76994e-06	-2.20486	PREDICTED: LIM domain-containing protein WLIM2b [Vitis vinifera]
gene24552	1.22478e-46	-8.56598	PREDICTED: uncharacterized protein LOC104441917 isoform X1 [Eucalyptus grandis]
gene27272	1.57232e-38	#NAME?	PREDICTED: patatin-like protein 3 [Cucumis melo]
gene31243	0.000100903	-3.86903	PREDICTED: auxin-induced protein X10A-like [Citrus sinensis]
gene5964	2.7498e-47	-2.8919	PREDICTED: 2-hydroxyisoflavanone dehydratase-like [Eucalyptus grandis]
Walnut_newGene_1910	1.48456e-70	-6.58423	Phospho-2-dehydro-3-deoxyheptonate aldolase 1, chloroplast precursor, putative [Ricinus communis]
Walnut_newGene_944	4.20528e-37	3.09039	hypothetical protein F775_32331 [Aegilops tauschii]
gene19058	1.2174e-80	3.90058	Subtilase family protein, putative [Theobroma cacao]
Walnut_newGene_5917	1.26224e-08	-2.22694	PREDICTED: granule-bound starch synthase 1, chloroplastic/amyloplastic [Nelumbo nucifera]
gene13361	6.66765e-38	-2.97603	PREDICTED: protein CHUP1, chloroplastic-like [Prunus mume]
gene12390	7.76887e-07	-2.58917	PREDICTED: lachrymatory-factor synthase-like [Fragaria vesca subsp. vesca]
gene12534	2.83419e-30	-2.8886	PREDICTED: RING finger and CHY zinc finger domain-containing protein 1 [Vitis vinifera]
gene1639	2.32533e-06	#NAME?	(-)-germacrene D synthase [Morus notabilis]
gene28894	2.35553e-31	-3.3635	LysM domain-containing GPI-anchored protein 1 [Morus notabilis]
gene30346	2.30128e-05	-2.8734	PREDICTED: transmembrane emp24 domain-containing protein p24delta9 [Vitis vinifera]
gene39991	1.48978e-123	3.59268	hypothetical protein PRUPE_ppb000367mg [Prunus persica]
gene14290	3.32614e-22	Inf	hypothetical protein JCGZ_21288 [Jatropha curcas]
gene34891	1.87157e-09	-4.72114	Thiamine thiazole synthase 2, chloroplastic [Gossypium arboreum]
gene41021	5.6421e-73	-6.66901	hypothetical protein PRUPE_ppa020149mg [Prunus persica]
gene32104	1.65063e-88	2.93098	hypothetical protein CISIN_1g010486mg [Citrus sinensis]
gene2270	1.33862e-41	-3.50183	Ethylene-responsive transcription factor [Morus notabilis]
gene2737	1.91251e-27	2.13132	hypothetical protein JCGZ_00912 [Jatropha curcas]
gene30544	2.23014e-05	-3.92896	SMARCA3-like protein 3 [Morus notabilis]
gene1783	3.08708e-13	-4.07067	PREDICTED: malate dehydrogenase, cytoplasmic-like isoform X1 [Cucumis melo]
gene8874	4.31568e-48	2.27026	hypothetical protein POPTR_0012s09110g [Populus trichocarpa]
Walnut_newGene_1179	0.000109999	-2.20742	PREDICTED: mediator of RNA polymerase II transcription subunit 31 isoform X1 [Nelumbo nucifera]
gene32153	1.12071e-23	-8.44164	serine carboxypeptidase S10 family protein [Populus trichocarpa]
gene29358	6.19209e-132	3.55793	hypothetical protein JCGZ_21837 [Jatropha curcas]
gene27396	2.09615e-12	#NAME?	unnamed protein product [Vitis vinifera]
gene3570	2.44984e-35	-3.82939	Expression of the gene is downregulated in the presence of paraquat, putative [Theobroma cacao]
gene41003	2.85336e-12	-2.84339	PREDICTED: uncharacterized protein LOC100251709 [Vitis vinifera]
gene37752	2.9138e-64	-4.37118	hypothetical protein F383_11848 [Gossypium arboreum]
gene22028	7.86342e-39	#NAME?	PREDICTED: phosphoethanolamine N-methyltransferase 1 [Eucalyptus grandis]
gene580	2.81907e-27	-3.72768	PREDICTED: vacuolar cation/proton exchanger 3-like [Malus domestica]
gene1637	4.3109e-18	-2.16485	spindle pole body component protein [Gossypium arboreum]
gene27846	2.64847e-13	Inf	hypothetical protein CISIN_1g020537mg [Citrus sinensis]
gene36096	0.00018669	-2.20093	hypothetical protein POPTR_0002s12860g [Populus trichocarpa]
gene32581	5.28995e-07	-4.22046	PREDICTED: spermidine hydroxycinnamoyl transferase [Vitis vinifera]
gene12663	1.63214e-41	2.05916	hypothetical protein L484_002544 [Morus notabilis]
gene20998	1.72889e-15	-4.65409	hypothetical protein EUTSA_v10015529mg, partial [Eutrema salsugineum]
gene25467	4.36589e-27	#NAME?	embryo-abundant family protein [Populus trichocarpa]
gene38143	1.97742e-147	-5.70061	PREDICTED: protein ASPARTIC PROTEASE IN GUARD CELL 1 [Malus domestica]
gene24418	1.5747e-05	-2.16105	PREDICTED: kinesin-13A-like [Prunus mume]
gene31106	6.03728e-06	3.50698	hypothetical protein CICLE_v10033163mg [Citrus clementina]
gene42020	0.000186316	-2.25317	PREDICTED: protein GLUTAMINE DUMPER 3-like [Fragaria vesca subsp. vesca]
gene1707	1.63403e-05	-2.07752	Kinase superfamily protein [Theobroma cacao]
gene1144	2.50823e-11	-11.7915	uncharacterized protein LOC100264512 [Vitis vinifera]
gene10416	9.61191e-09	4.76588	DNAJ heat shock N-terminal domain-containing protein [Theobroma cacao]
Walnut_newGene_1199	9.55647e-05	-2.27149	hypothetical protein VITISV_026680 [Vitis vinifera]
gene29855	1.01247e-11	-2.47901	PREDICTED: probable protein phosphatase 2C 73-like isoform X1 [Citrus sinensis]
Walnut_newGene_6769	4.32654e-10	Inf	--
Walnut_newGene_1662	2.13702e-52	Inf	--
gene7895	5.36973e-96	-8.59615	glycosyltransferase [Actinidia deliciosa]
gene25137	8.62475e-78	-8.00492	PREDICTED: cucumisin-like [Vitis vinifera]
gene31039	2.1607e-05	-3.79776	hypothetical protein CICLE_v10019109mg [Citrus clementina]
gene10670	2.20524e-63	5.28531	PREDICTED: probable mitochondrial chaperone bcs1 [Prunus mume]
gene28702	3.92468e-06	-4.10936	PREDICTED: putative indole-3-acetic acid-amido synthetase GH3.9 [Vitis vinifera]
gene33065	5.37468e-08	-4.78757	Phosphatase 2C family protein [Theobroma cacao]
gene6529	1.03742e-18	4.63779	PREDICTED: uncharacterized protein LOC103332400 [Prunus mume]
gene23496	2.78552e-16	#NAME?	PREDICTED: cyclic nucleotide-gated ion channel 1 [Sesamum indicum]
gene5384	1.50066e-34	#NAME?	glycine decarboxylase complex T, partial [Populus fremontii]
gene31964	1.37139e-11	#NAME?	hypothetical protein PRUPE_ppa008294mg [Prunus persica]
Walnut_newGene_1845	1.33942e-24	#NAME?	hypothetical protein F383_09625 [Gossypium arboreum]
gene14511	5.82647e-40	-11.8819	PREDICTED: fatty acyl-CoA reductase 3 [Vitis vinifera]
gene5400	5.91253e-29	3.09707	hypothetical protein POPTR_0003s21900g [Populus trichocarpa]
gene15615	0.000499931	-2.72866	hypothetical protein POPTR_0009s03900g [Populus trichocarpa]
gene32948	6.64186e-08	-3.93524	PREDICTED: GDSL esterase/lipase At1g54790 isoform X3 [Eucalyptus grandis]
gene39145	9.54512e-09	-4.41247	xyloglucan endotransglucosylase/hydrolase family protein [Medicago truncatula]
gene34484	1.09976e-41	-8.70343	PREDICTED: small heat shock protein, chloroplastic-like [Malus domestica]
Walnut_newGene_354	2.33009e-06	3.25987	conserved hypothetical protein [Ricinus communis]
gene32835	6.35158e-14	#NAME?	Cytochrome P450, family 81, subfamily K, polypeptide 2, putative [Theobroma cacao]
gene30216	7.26806e-23	Inf	PREDICTED: thaumatin-like protein 1-like isoform X2 [Cicer arietinum]
gene1147	1.09257e-08	-3.11827	PREDICTED: protein ELF4-LIKE 4 [Vitis vinifera]
gene12166	0.000883299	-4.04234	unnamed protein product [Vitis vinifera]
gene12732	0.000255568	-5.0887	PREDICTED: probable galacturonosyltransferase-like 1 [Nicotiana sylvestris]
gene40635	7.71733e-181	4.31223	Late embryogenesis abundant hydroxyproline-rich glycofamily protein, putative [Theobroma cacao]
gene5738	2.12326e-135	3.82158	PREDICTED: cellulose synthase-like protein G3 [Prunus mume]
gene22286	9.2776e-71	6.52486	PREDICTED: receptor-like protein 12 [Pyrus x bretschneideri]
Walnut_newGene_3428	2.54922e-11	4.06512	hypothetical protein PHAVU_011G114500g, partial [Phaseolus vulgaris]
gene40174	2.06455e-72	-2.58457	PREDICTED: remorin [Cucumis melo]
Walnut_newGene_3248	2.9019e-15	2.13074	hypothetical protein CISIN_1g002174mg [Citrus sinensis]
gene27679	3.33488e-05	-3.4419	PREDICTED: dof zinc finger protein DOF1.1-like [Populus euphratica]
gene22082	3.6954e-05	-2.9575	PREDICTED: uncharacterized protein LOC103329518 [Prunus mume]
gene19619	1.90645e-10	6.63402	Kinase superfamily protein [Theobroma cacao]
gene30177	4.99926e-15	-2.6877	hypothetical protein PRUPE_ppa004411mg [Prunus persica]
gene38552	3.28307e-13	#NAME?	Uncharacterized protein TCM_021121 [Theobroma cacao]
gene5588	6.98574e-43	-2.16705	PREDICTED: subtilisin-like protease SBT5.3 [Pyrus x bretschneideri]
gene40959	6.46637e-67	-5.09705	PREDICTED: protein MID1-COMPLEMENTING ACTIVITY 1 [Vitis vinifera]
gene14295	0.000142649	-3.52385	conserved hypothetical protein [Ricinus communis]
gene24607	1.88664e-06	2.92183	PREDICTED: uncharacterized protein LOC100793722 [Glycine max]
gene20995	3.85028e-26	-5.30345	PREDICTED: putative disease resistance protein At3g14460 [Malus domestica]
gene30956	2.9732e-09	#NAME?	PREDICTED: O-acyltransferase WSD1-like [Eucalyptus grandis]
gene9379	4.38149e-08	-3.07506	hypothetical protein L484_026185 [Morus notabilis]
gene20948	5.28192e-07	-5.99942	CYP71D51v3 [Nicotiana tabacum]
gene14666	0.000197225	-4.1273	Uncharacterized protein TCM_024909 [Theobroma cacao]
gene41290	1.50004e-56	-4.8138	hypothetical protein JCGZ_21657 [Jatropha curcas]
gene16300	1.15906e-10	-6.71847	PREDICTED: UDP-glycosyltransferase 92A1-like [Vitis vinifera]
gene37890	1.42746e-07	3.14719	hypothetical protein PRUPE_ppa016383mg [Prunus persica]
gene15519	4.47244e-18	-3.28064	PREDICTED: serine/threonine-protein kinase TIO [Vitis vinifera]
gene35882	4.90672e-72	3.18063	PREDICTED: TMV resistance protein N-like [Pyrus x bretschneideri]
gene6722	1.7703e-14	-4.3636	PREDICTED: non-specific lipid transfer protein GPI-anchored 1-like [Populus euphratica]
gene37103	5.66409e-05	-2.38894	hypothetical protein L484_024950 [Morus notabilis]
gene37006	3.05402e-05	-3.05759	PREDICTED: rop guanine nucleotide exchange factor 1 [Prunus mume]
gene5755	5.5558e-60	-4.13395	Chaperone DnaJ [Gossypium arboreum]
gene28843	8.04588e-11	-3.57521	PREDICTED: probable serine/threonine-protein kinase WNK3 isoform X2 [Prunus mume]
gene30297	3.00963e-18	-2.17062	unnamed protein product [Vitis vinifera]
gene26363	3.56701e-12	-2.66914	hypothetical protein CISIN_1g006846mg [Citrus sinensis]
gene7201	0	-12.4592	photosystem I 11K family protein [Populus trichocarpa]
gene32511	4.23265e-05	-3.4863	hypothetical protein JCGZ_03435 [Jatropha curcas]
gene13594	1.11987e-05	-2.2045	PREDICTED: uncharacterized protein LOC103323209 [Prunus mume]
gene14051	0.000556707	-2.91965	PREDICTED: probable LRR receptor-like serine/threonine-protein kinase At2g24230 [Prunus mume]
gene27149	1.47864e-42	-4.03805	Formin [Theobroma cacao]
gene2763	5.06604e-59	-4.22636	Microtubule-associated proteins 65-1 isoform 1 [Theobroma cacao]
gene7780	1.72142e-91	2.80286	ABC2 isoform 1 [Theobroma cacao]
gene24811	1.87203e-05	2.07349	hypothetical protein PHAVU_006G181600g [Phaseolus vulgaris]
gene22287	5.26163e-12	3.10407	hypothetical protein JCGZ_18786 [Jatropha curcas]
gene26203	5.65799e-09	-2.65206	hypothetical protein PRUPE_ppa018734mg [Prunus persica]
gene3226	3.53178e-61	2.95144	ATP binding protein, putative [Ricinus communis]
gene32339	5.7973e-40	-3.71086	PREDICTED: serine/threonine-protein kinase At3g07070 [Prunus mume]
gene12730	2.75563e-13	-2.27611	LIM and UIM domain-containing [Theobroma cacao]
gene1538	8.3659e-27	-2.13509	hypothetical protein L484_009602 [Morus notabilis]
gene15275	2.58358e-06	-6.9428	hypothetical protein CICLE_v10017825mg, partial [Citrus clementina]
gene13092	8.80566e-19	5.16309	hypothetical protein PRUPE_ppa016284mg [Prunus persica]
gene26259	1.08974e-14	-3.95764	AP2/B3-like transcriptional factor family protein, putative [Theobroma cacao]
gene27169	1.17846e-211	Inf	conserved hypothetical protein [Ricinus communis]
gene8082	7.20726e-36	-7.41903	PREDICTED: receptor-like protein 12 isoform X1 [Vitis vinifera]
gene10631	1.58819e-12	-2.06094	PREDICTED: IAA-amino acid hydrolase ILR1-like 5 [Malus domestica]
gene19493	4.98234e-09	-6.2281	hypothetical protein JCGZ_24477 [Jatropha curcas]
gene11211	1.60601e-24	-2.6394	PREDICTED: uncharacterized protein LOC103342253 [Prunus mume]
gene40675	2.58045e-16	2.89985	hypothetical protein PRUPE_ppa005552mg [Prunus persica]
gene33494	1.34843e-24	-2.09711	hypothetical protein PRUPE_ppa000107mg [Prunus persica]
gene42707	3.66938e-06	-6.07846	hypothetical protein POPTR_0012s06670g [Populus trichocarpa]
gene21842	4.70664e-110	9.72323	PREDICTED: protein sym-1-like isoform X1 [Eucalyptus grandis]
gene13486	6.791e-47	3.36618	PREDICTED: wall-associated receptor kinase 2-like [Sesamum indicum]
gene23847	7.5027e-05	-4.34305	PREDICTED: glucan endo-1,3-beta-glucosidase 1 [Vitis vinifera]
gene29629	2.81383e-54	-2.87335	PREDICTED: enolase-phosphatase E1-like isoform X1 [Citrus sinensis]
gene16065	8.14445e-05	-2.10029	Calcium-dependent protein kinase 20 [Morus notabilis]
gene40544	1.84776e-29	-4.80586	Periplasmic beta-glucosidase precursor, putative [Ricinus communis]
Walnut_newGene_1746	5.37096e-06	3.51874	hypothetical protein VITISV_017554 [Vitis vinifera]
gene36858	5.48804e-81	-6.08953	hypothetical protein PRUPE_ppa018082mg [Prunus persica]
gene17015	6.87367e-09	#NAME?	hypothetical protein POPTR_0003s07460g [Populus trichocarpa]
gene16924	4.44843e-16	-5.73071	tubulin beta chain, putative [Ricinus communis]
gene28405	3.83341e-06	-3.14034	hypothetical protein JCGZ_11114 [Jatropha curcas]
gene39506	1.48041e-15	Inf	PREDICTED: uncharacterized protein LOC103334783 [Prunus mume]
Walnut_newGene_4454	1.60361e-72	#NAME?	hypothetical protein CICLE_v10003083mg [Citrus clementina]
gene13880	4.56809e-130	-6.6949	PREDICTED: BAG family molecular chaperone regulator 2-like [Prunus mume]
gene36934	3.1308e-20	#NAME?	signal transducer, putative [Ricinus communis]
gene20068	3.08606e-08	4.43576	superoxide dismutase [Cu-Zn] 4AP [Zea mays]
gene33066	3.0182e-06	-4.68986	hypothetical protein CISIN_1g001663mg [Citrus sinensis]
gene28540	1.59807e-127	-3.71224	PREDICTED: probable protein Pop3-like [Citrus sinensis]
Walnut_newGene_491	1.27955e-18	#NAME?	hypothetical protein POPTR_0019s14230g [Populus trichocarpa]
gene40371	4.11883e-30	2.71663	PREDICTED: protein P21-like [Prunus mume]
gene29378	0.000137013	-2.3885	hypothetical protein CICLE_v10033969mg [Citrus clementina]
gene34962	8.30011e-05	-2.10954	Peroxidase superfamily protein [Theobroma cacao]
gene8911	2.09045e-69	6.11338	hypothetical protein PRUPE_ppa015388mg [Prunus persica]
gene11172	4.57435e-53	-2.26357	PREDICTED: blue-light photoreceptor PHR2 [Prunus mume]
gene7974	2.10229e-08	-3.92588	PREDICTED: cytochrome b561 and DOMON domain-containing protein At5g47530 [Populus euphratica]
gene38061	1.37921e-09	-5.23607	PREDICTED: U6 snRNA-associated Sm-like protein LSm2 [Malus domestica]
gene4508	7.64339e-14	-3.15251	hypothetical protein PRUPE_ppa012671mg [Prunus persica]
gene38358	0.000209111	-4.30956	PREDICTED: putative E3 ubiquitin-protein ligase LIN-1 isoform X2 [Vitis vinifera]
gene31782	2.69138e-44	-2.24569	PREDICTED: (-)-isopiperitenol/(-)-carveol dehydrogenase, mitochondrial [Vitis vinifera]
gene36369	6.2732e-35	-3.06089	PREDICTED: protein STRUBBELIG-RECEPTOR FAMILY 3-like [Malus domestica]
Walnut_newGene_896	2.08506e-06	-3.45565	hypothetical protein PRUPE_ppa008990mg [Prunus persica]
gene22915	0.000732848	-2.15202	hypothetical protein CISIN_1g0289242mg [Citrus sinensis]
gene3555	3.72563e-12	-2.75191	PREDICTED: microtubule-associated protein TORTIFOLIA1 [Prunus mume]
Walnut_newGene_5110	3.65735e-59	4.39301	hypothetical protein CISIN_1g001778mg [Citrus sinensis]
gene33037	0.000192607	-6.67962	glucuronoxylan methyltransferase 1 [Populus trichocarpa]
gene34031	1.23525e-16	-5.41024	hypothetical protein PRUPE_ppa019752mg [Prunus persica]
gene27648	2.67131e-09	3.10654	hypothetical protein JCGZ_01609 [Jatropha curcas]
gene1321	1.03169e-40	-2.0624	hypothetical protein PRUPE_ppa001070mg [Prunus persica]
gene253	1.4881e-14	-3.17633	PREDICTED: protein notum homolog isoform X1 [Glycine max]
gene3100	3.19579e-09	-5.5394	PREDICTED: dirigent protein 22-like [Populus euphratica]
gene27344	1.43971e-27	-3.75364	hypothetical protein POPTR_0005s07810g [Populus trichocarpa]
gene29836	2.9732e-09	-6.29509	Cyclin-like F-box; FAR1; Zinc finger, SWIM-type [Medicago truncatula]
gene37215	0.000365793	-2.20295	heavy-metal-associated domain-containing family protein [Populus trichocarpa]
gene6389	3.24699e-12	-7.07015	PREDICTED: cell division control protein 48 homolog D [Pyrus x bretschneideri]
gene13731	0	13.698	hypothetical protein CICLE_v10020315mg [Citrus clementina]
gene22931	5.00727e-37	7.65748	ankyrin repeat-containing protein, putative [Ricinus communis]
gene13230	1.24733e-46	-4.08429	hypothetical protein CICLE_v10022410mg [Citrus clementina]
gene38961	0.000816034	2.18497	PREDICTED: probable calcium-binding protein CML47 [Malus domestica]
gene33571	6.11575e-45	-7.47234	RecName: Full=Lupeol synthase [Betula platyphylla]
gene16201	2.0739e-50	-3.91561	auxin influx transport protein [Casuarina glauca]
gene41699	6.41752e-21	-3.20631	PREDICTED: tropinone reductase homolog At1g07440-like [Eucalyptus grandis]
gene14742	0.00031199	-6.39041	hypothetical protein JCGZ_25104 [Jatropha curcas]
gene4968	1.34933e-05	-2.23983	PREDICTED: myb-related protein 306-like [Nelumbo nucifera]
gene16331	6.08482e-17	-4.45589	PREDICTED: probable LRR receptor-like serine/threonine-protein kinase At1g56130 [Vitis vinifera]
Walnut_newGene_4776	1.31644e-05	-3.38611	hypothetical protein CICLE_v10024638mg [Citrus clementina]
gene24613	1.59981e-09	Inf	hypothetical protein JCGZ_22529 [Jatropha curcas]
gene31247	2.1099e-38	#NAME?	SAUR family protein [Theobroma cacao]
gene169	3.64543e-223	6.09392	PREDICTED: thaumatin-like protein 1b [Malus domestica]
gene17248	6.24028e-12	#NAME?	PREDICTED: wall-associated receptor kinase 2-like [Vitis vinifera]
gene12576	0.00033615	-4.17503	hypothetical protein POPTR_0001s35870g [Populus trichocarpa]
gene14311	6.24569e-20	-9.23212	PREDICTED: aspartic proteinase nepenthesin-1-like [Vitis vinifera]
gene36999	4.36531e-20	-6.36561	hypothetical protein CICLE_v10028265mg [Citrus clementina]
gene18488	4.25159e-18	Inf	PREDICTED: TMV resistance protein N-like [Vitis vinifera]
gene43052	1.53422e-30	Inf	hypothetical protein POPTR_0012s11410g [Populus trichocarpa]
gene1516	1.78239e-07	2.03877	E3 ubiquitin-protein ligase [Morus notabilis]
gene40776	1.57996e-40	#NAME?	hypothetical protein JCGZ_10745 [Jatropha curcas]
gene40404	9.11761e-06	-3.15952	transferase, transferring glycosyl groups, putative [Ricinus communis]
gene9139	2.55325e-08	#NAME?	Mavicyanin [Glycine soja]
gene7842	3.53614e-36	-4.7625	hypothetical protein L484_000914 [Morus notabilis]
gene20166	1.90288e-22	4.87256	Leucine-rich repeat transmembrane protein kinase protein, putative [Theobroma cacao]
gene15313	3.48026e-21	#NAME?	PREDICTED: GDSL esterase/lipase At2g04570-like [Malus domestica]
gene25488	2.77411e-22	2.05697	PREDICTED: probable LRR receptor-like serine/threonine-protein kinase At4g08850-like [Fragaria vesca subsp. vesca]
gene9069	3.01841e-10	-2.61849	PREDICTED: root phototropism protein 3 [Vitis vinifera]
gene28096	1.75179e-09	6.38649	GDSL lipase 1, putative [Theobroma cacao]
gene40685	2.88275e-10	-4.26836	PREDICTED: uncharacterized protein LOC103337496 [Prunus mume]
gene23755	0.00081732	-5.23289	Tonoplast intrinsic protein 1,3 [Theobroma cacao]
gene33929	2.0803e-72	-7.461	Integrase-type DNA-binding superfamily protein, putative [Theobroma cacao]
gene36699	0.000280782	-2.04244	hypothetical protein CICLE_v10029467mg [Citrus clementina]
gene9113	1.08244e-17	-5.67962	PREDICTED: uncharacterized protein LOC105127223 isoform X1 [Populus euphratica]
gene28470	1.13384e-201	4.80725	Pleiotropic drug resistance 12 [Theobroma cacao]
gene7837	2.86292e-88	#NAME?	PREDICTED: GDSL esterase/lipase At5g45910 [Prunus mume]
gene28717	1.24776e-27	#NAME?	PREDICTED: heat stress transcription factor A-1d isoform X1 [Populus euphratica]
gene27182	2.19309e-10	#NAME?	cytosolic NAD-malate dehydrogenase [Annona cherimola]
gene386	9.28333e-20	-6.07145	PREDICTED: omega-hydroxypalmitate O-feruloyl transferase [Vitis vinifera]
gene12304	4.97709e-09	3.99661	hypothetical protein CICLE_v10002694mg [Citrus clementina]
gene29640	1.55273e-54	-2.14773	PREDICTED: probable inactive leucine-rich repeat receptor-like protein kinase At3g03770 [Vitis vinifera]
gene26497	1.1218e-19	-4.17236	PREDICTED: fatty acid amide hydrolase-like isoform X1 [Prunus mume]
gene31973	4.04853e-16	-4.33713	hypothetical protein JCGZ_23194 [Jatropha curcas]
Walnut_newGene_6041	5.16231e-05	2.77743	hypothetical protein VITISV_009561 [Vitis vinifera]
gene36561	2.18506e-23	-4.82473	hypothetical protein CICLE_v10012179mg [Citrus clementina]
gene31268	1.69366e-06	-4.12337	hypothetical protein POPTR_0004s16850g [Populus trichocarpa]
gene5712	6.0708e-07	-2.74235	PREDICTED: short-chain dehydrogenase TIC 32, chloroplastic [Eucalyptus grandis]
gene25439	6.88332e-06	-2.03969	hypothetical protein CICLE_v10002475mg [Citrus clementina]
gene35632	2.16571e-16	-3.44196	PREDICTED: uncharacterized protein LOC100818979 [Glycine max]
gene35619	3.74469e-10	-4.8708	PREDICTED: protein NRT1/ PTR FAMILY 5.6-like [Malus domestica]
gene42132	3.34007e-05	-2.34141	ent-kaurene synthase [Castanea mollissima]
gene9388	2.88507e-15	-3.90031	Mitochondrial carnitine/acylcarnitine carrier protein, putative [Ricinus communis]
gene29672	1.48781e-12	2.40537	S-locus lectin protein kinase family protein isoform 1 [Theobroma cacao]
Walnut_newGene_6945	8.8479e-08	-2.22053	--
gene24563	7.26406e-05	-2.16351	Nuc-1 negative regulatory protein preg, putative [Ricinus communis]
gene21239	6.84377e-06	2.65255	PREDICTED: cytochrome c6, chloroplastic [Vitis vinifera]
gene39879	5.8061e-18	-4.533	ABC transporter G family member 16 [Morus notabilis]
gene38504	0	8.84576	PREDICTED: endo-1,3;1,4-beta-D-glucanase-like [Eucalyptus grandis]
gene8667	1.20577e-16	-5.27584	PREDICTED: ABC transporter G family member 15-like [Cucumis melo]
gene13765	4.64486e-14	-5.73694	PREDICTED: uncharacterized protein LOC100242579 isoform X1 [Vitis vinifera]
gene40014	9.92191e-21	-3.3754	hypothetical protein PRUPE_ppa000698mg [Prunus persica]
gene42577	1.6194e-123	-6.89986	Xyloglucan endotransglucosylase/hydrolase 16 [Theobroma cacao]
gene2077	4.83208e-11	#NAME?	hypothetical protein PRUPE_ppa019516mg, partial [Prunus persica]
gene14198	9.74459e-18	2.6727	PREDICTED: probable receptor-like protein kinase At1g67000 [Malus domestica]
gene16165	2.11381e-125	3.38049	PREDICTED: probable leucine-rich repeat receptor-like serine/threonine-protein kinase At3g14840 [Prunus mume]
gene4651	2.62161e-14	#NAME?	PREDICTED: gibberellin-regulated protein 1-like [Cucumis melo]
gene14865	4.54544e-12	Inf	Mitochondrial transcription termination factor family protein isoform 1 [Theobroma cacao]
gene12063	0.000103756	-2.70069	hypothetical protein PRUPE_ppa000171mg [Prunus persica]
gene1124	2.69222e-09	-9.12701	PREDICTED: transcription factor MYB12-like [Glycine max]
gene22548	4.10516e-46	#NAME?	hypothetical protein JCGZ_22481 [Jatropha curcas]
gene16124	3.76213e-91	-6.29703	PREDICTED: aspartic proteinase nepenthesin-2-like [Malus domestica]
Walnut_newGene_5558	5.54056e-08	-3.70002	Serine carboxypeptidase S28 family protein [Theobroma cacao]
gene38759	1.9807e-06	-2.87129	hypothetical protein PRUPE_ppa003926mg [Prunus persica]
gene35629	8.12414e-14	#NAME?	PREDICTED: UDP-glycosyltransferase 76C4 [Vitis vinifera]
gene16988	0.000658099	2.02002	conserved hypothetical protein [Ricinus communis]
gene39371	6.63324e-08	-3.24465	PREDICTED: pentatricopeptide repeat-containing protein At1g63330-like [Prunus mume]
gene15038	2.32639e-10	3.19531	hypothetical protein POPTR_0002s11900g [Populus trichocarpa]
Walnut_newGene_558	2.99031e-15	-2.16826	putative gag protein [Coffea canephora]
gene7131	1.19523e-13	-3.70253	PREDICTED: glucan endo-1,3-beta-glucosidase 5-like [Populus euphratica]
Walnut_newGene_3823	3.26969e-06	-2.78356	CCHC-type integrase [Populus trichocarpa]
gene28007	1.60279e-32	3.23372	PREDICTED: putative DNA-binding protein ESCAROLA [Nelumbo nucifera]
gene24057	1.80397e-17	#NAME?	hypothetical protein L484_014239 [Morus notabilis]
Walnut_newGene_6162	9.01888e-10	3.78444	PREDICTED: uncharacterized protein LOC104442889 [Eucalyptus grandis]
gene29352	1.87071e-18	-7.97139	uncharacterized protein LOC100802228 [Glycine max]
gene38974	2.54635e-40	8.34205	hypothetical protein VITISV_024007 [Vitis vinifera]
gene29426	5.70175e-98	5.5334	unnamed protein product [Coffea canephora]
gene573	1.23527e-06	-4.29317	aquaporin protein AQU20 [Camellia sinensis]
gene40135	1.99604e-22	7.39194	PREDICTED: wall-associated receptor kinase-like 22 [Malus domestica]
gene39500	2.59809e-31	-6.55446	hypothetical protein CICLE_v10033128mg [Citrus clementina]
gene40423	1.90881e-25	-5.19114	hypothetical protein CISIN_1g018558mg [Citrus sinensis]
gene41875	2.80365e-10	-3.87062	LRR and NB-ARC domains-containing disease resistance protein, putative [Theobroma cacao]
gene8062	8.6724e-16	4.46779	Heat shock transcription factor C1, putative [Theobroma cacao]
gene36968	8.10887e-08	-2.46793	PREDICTED: uncharacterized protein LOC100261046 [Vitis vinifera]
gene24809	2.54105e-09	6.30121	hypothetical protein CICLE_v10015583mg [Citrus clementina]
gene30911	4.77677e-11	Inf	hypothetical protein OsI_03168 [Oryza sativa Indica Group]
gene23717	6.46971e-09	Inf	uncharacterized protein LOC100500690 precursor [Glycine max]
gene1575	9.73996e-11	2.00665	Uncharacterized protein TCM_031362 [Theobroma cacao]
Walnut_newGene_1730	0.000296511	2.72155	PREDICTED: probable LRR receptor-like serine/threonine-protein kinase RFK1-like [Citrus sinensis]
gene24988	3.49176e-39	-2.2724	hypothetical protein L484_017174 [Morus notabilis]
gene16521	1.26346e-30	-3.37096	YABBY2-like transcription factor YAB2 [Morella rubra]
gene16050	2.99721e-10	-4.18143	Heavy metal transport/detoxification superfamily protein, putative [Theobroma cacao]
gene9285	3.69606e-11	4.15951	PREDICTED: G-type lectin S-receptor-like serine/threonine-protein kinase At1g11300 [Vitis vinifera]
gene1272	2.71975e-11	-7.34335	Leucine-rich repeat family protein / extensin family protein [Theobroma cacao]
gene12081	1.12731e-11	-4.38609	hypothetical protein PRUPE_ppa007467mg [Prunus persica]
gene32443	2.96897e-05	2.54555	PREDICTED: uncharacterized protein LOC100268097 [Vitis vinifera]
gene8774	7.09968e-187	-6.2362	Codeine O-demethylase [Morus notabilis]
gene7294	0.000160365	2.84064	PREDICTED: RING-H2 finger protein ATL51-like [Vitis vinifera]
gene37313	1.46283e-07	3.34222	hypothetical protein PRUPE_ppa017073mg [Prunus persica]
gene31413	1.0698e-08	-4.74412	Peroxidase 6 precursor family protein [Populus trichocarpa]
Walnut_newGene_5356	1.62187e-17	-2.8768	hypothetical protein PHAVU_008G250100g [Phaseolus vulgaris]
gene28801	1.86982e-07	-3.36602	cellulose synthase 8 [Betula luminifera]
gene39960	4.6844e-103	3.09907	Oligopeptide transporter 1 [Morus notabilis]
Walnut_newGene_4889	5.71804e-13	3.28849	T4.18 [Malus x robusta]
gene23535	5.32125e-22	2.08517	hypothetical protein PRUPE_ppa022167mg [Prunus persica]
gene4621	3.94899e-23	-3.88028	hypothetical protein PHAVU_001G105800g [Phaseolus vulgaris]
gene32276	4.61178e-23	-2.53376	sucrose synthase 3 [Betula luminifera]
gene40188	1.1594e-304	-7.23426	tonoplast intrinsic protein, putative [Ricinus communis]
gene40845	6.85656e-11	-5.23765	PREDICTED: succinate dehydrogenase [ubiquinone] flavoprotein subunit 1, mitochondrial [Populus euphratica]
gene8666	3.81914e-25	-8.08493	ABC-2 type transporter family protein isoform 1 [Theobroma cacao]
gene30287	9.07829e-39	-2.34673	hypothetical protein PRUPE_ppa003145mg [Prunus persica]
gene31732	3.0858e-07	2.49799	2-oxoglutarate and Fe(II)-dependent oxygenase superfamily protein isoform 2 [Theobroma cacao]
gene7675	1.59985e-07	-2.38893	PREDICTED: tobamovirus multiplication protein 2A-like isoform X1 [Citrus sinensis]
gene24162	9.55435e-32	-4.16836	PREDICTED: uncharacterized protein LOC100246465 [Vitis vinifera]
gene13300	2.21563e-05	#NAME?	PREDICTED: mavicyanin-like [Pyrus x bretschneideri]
gene7288	1.01124e-09	#NAME?	hypothetical protein JCGZ_08635 [Jatropha curcas]
gene7662	0.000126335	-3.70864	hypothetical protein JCGZ_10817 [Jatropha curcas]
gene26478	1.53343e-50	-2.74042	PREDICTED: UDP-arabinose 4-epimerase 1 [Prunus mume]
gene23255	2.77755e-15	#NAME?	PREDICTED: short-chain dehydrogenase TIC 32, chloroplastic-like isoform X3 [Cicer arietinum]
gene3314	5.11704e-28	2.61925	hypothetical protein POPTR_0014s06020g [Populus trichocarpa]
gene17825	1.35526e-06	3.91356	stress induced protein [Morella rubra]
gene29910	9.24693e-21	#NAME?	hypothetical protein CICLE_v10032973mg [Citrus clementina]
gene33898	1.1781e-20	-5.98487	hypothetical protein PRUPE_ppa015783mg [Prunus persica]
gene16802	6.10074e-101	-5.96427	endo-1,4-beta-glucanase 3 [Betula luminifera]
gene16083	0.00018013	-5.3443	PREDICTED: uncharacterized protein LOC103952721 [Pyrus x bretschneideri]
gene1892	2.54261e-08	3.12589	PREDICTED: uncharacterized protein LOC100852615 [Vitis vinifera]
gene194	7.99599e-11	#NAME?	glucuronoxylan methyltransferase 1 [Populus trichocarpa]
gene16414	3.23092e-09	#NAME?	DNA binding protein, putative [Ricinus communis]
gene33826	8.83399e-07	-2.32338	hypothetical protein L484_010998 [Morus notabilis]
gene38641	6.89299e-15	2.45634	PREDICTED: uncharacterized protein At4g37920, chloroplastic [Prunus mume]
gene14487	5.48838e-108	-7.00874	PREDICTED: glucomannan 4-beta-mannosyltransferase 2-like [Pyrus x bretschneideri]
gene38810	2.26349e-28	-4.17128	PREDICTED: probable galacturonosyltransferase-like 1 [Vitis vinifera]
gene15081	1.14005e-05	-3.11517	hypothetical protein CISIN_1g014368mg [Citrus sinensis]
gene9082	1.73132e-16	-5.77315	PREDICTED: epidermis-specific secreted glycoprotein EP1-like [Vitis vinifera]
gene8728	6.71512e-76	-4.76246	Leucine-rich repeat receptor-like protein kinase family protein, putative isoform 1 [Theobroma cacao]
gene35977	2.96586e-07	-3.38752	zinc finger protein, putative [Ricinus communis]
gene21491	1.65565e-13	2.07994	PREDICTED: G-type lectin S-receptor-like serine/threonine-protein kinase At1g11410 [Prunus mume]
gene6030	1.08316e-29	#NAME?	hypothetical protein L484_010673 [Morus notabilis]
gene22087	6.86338e-41	Inf	Small nuclear ribonucleoprotein E [Gossypium arboreum]
gene15583	1.0084e-97	2.94133	class V chitinase family protein [Populus trichocarpa]
gene8415	5.34695e-88	-2.86885	hypothetical protein PRUPE_ppa008743mg [Prunus persica]
gene165	1.25637e-16	2.05474	PREDICTED: TMV resistance protein N-like [Prunus mume]
gene4896	1.1435e-38	-3.06036	s-adenosylmethionine synthetase, putative [Ricinus communis]
gene15964	1.95425e-45	#NAME?	urease [Cajanus cajan]
gene35093	1.59378e-05	-3.03871	PREDICTED: kinesin-like protein KIF11-A [Vitis vinifera]
gene5419	2.65366e-25	-5.78457	hypothetical protein POPTR_0017s13090g [Populus trichocarpa]
gene12895	1.24912e-05	-3.20295	AP2/EREBP transcriptional factor WRI1 [Jatropha curcas]
Walnut_newGene_3427	4.02914e-20	2.42511	hypothetical protein PHAVU_011G114500g, partial [Phaseolus vulgaris]
gene6028	5.3542e-06	-2.44506	Transcription factor RF2b [Morus notabilis]
gene33394	2.83826e-137	5.34677	Heat Stress Transcription Factor family protein [Populus trichocarpa]
gene21943	9.84285e-169	-4.19836	peroxiredoxin-2B [Nelumbo nucifera]
gene16935	4.55829e-06	-2.22193	PREDICTED: uncharacterized protein LOC103954829 [Pyrus x bretschneideri]
gene32736	9.86493e-08	-6.15928	Cytochrome P450 82A3, putative isoform 1 [Theobroma cacao]
gene41662	3.12433e-22	-5.53833	18.2 kDa class I heat shock protein [Medicago truncatula]
gene5995	1.4864e-66	2.5681	PREDICTED: probable CCR4-associated factor 1 homolog 11 [Pyrus x bretschneideri]
gene13421	0.00091205	2.38921	hypothetical protein JCGZ_08231 [Jatropha curcas]
gene7204	1.66689e-09	-2.92858	PREDICTED: 30S ribosomal protein S17, chloroplastic [Nelumbo nucifera]
gene8429	2.44572e-09	-2.82213	PREDICTED: type I inositol 1,4,5-trisphosphate 5-phosphatase CVP2-like [Malus domestica]
gene13495	1.00348e-09	-8.03399	hypothetical protein PHAVU_004G154200g [Phaseolus vulgaris]
gene11370	7.93362e-15	-2.22083	hypothetical protein PRUPE_ppa001580mg [Prunus persica]
gene33477	1.1838e-67	9.0398	PREDICTED: putative U-box domain-containing protein 42 [Prunus mume]
gene26838	4.72849e-25	-6.44657	PREDICTED: probable sugar phosphate/phosphate translocator At5g04160 [Pyrus x bretschneideri]
gene35119	3.07061e-09	-2.00838	PREDICTED: uncharacterized protein LOC103337883 [Prunus mume]
gene39738	2.91261e-06	-3.92071	PREDICTED: uncharacterized protein LOC105136383 [Populus euphratica]
gene42319	1.66345e-97	2.95424	hypothetical protein PRUPE_ppa011491mg [Prunus persica]
gene24994	1.67778e-15	-4.14509	hypothetical protein CARUB_v10002452mg [Capsella rubella]
gene8093	0.000367219	-2.11737	hypothetical protein EUGRSUZ_H04126 [Eucalyptus grandis]
gene22430	1.45644e-147	-5.48886	PREDICTED: cytochrome P450 711A1-like [Pyrus x bretschneideri]
Walnut_newGene_5592	4.69242e-19	#NAME?	PREDICTED: uncharacterized protein LOC100855263 [Vitis vinifera]
gene26684	6.98204e-07	-4.38751	NAC domain containing protein 57 [Theobroma cacao]
gene29794	5.12818e-53	-4.60678	PREDICTED: small heat shock protein, chloroplastic-like [Nelumbo nucifera]
gene18073	1.32915e-27	8.67605	PREDICTED: chlorophyll(ide) b reductase NOL, chloroplastic-like [Malus domestica]
gene39358	3.3912e-09	-6.28255	PREDICTED: phospholipase A1-Igamma2, chloroplastic-like [Malus domestica]
gene38342	1.2861e-10	2.46446	hypothetical protein PRUPE_ppa000529mg [Prunus persica]
gene5671	1.72579e-11	2.23003	PREDICTED: uncharacterized protein LOC103500715 [Cucumis melo]
gene6818	2.51902e-61	-2.89677	hypothetical protein F383_06303 [Gossypium arboreum]
gene31734	5.31424e-06	4.95543	PREDICTED: protein SRG1 [Vitis vinifera]
gene22567	2.23106e-11	#NAME?	PREDICTED: pathogenesis-related leaf protein 6 [Vitis vinifera]
gene21110	0.000116838	2.74143	PREDICTED: receptor-like protein 12 [Vitis vinifera]
Walnut_newGene_4668	3.33228e-09	-5.53534	hypothetical protein L484_010382 [Morus notabilis]
gene35623	2.35789e-07	2.16193	conserved hypothetical protein [Ricinus communis]
gene36153	3.61502e-08	-3.74816	PREDICTED: ent-kaurene oxidase, chloroplastic-like [Malus domestica]
gene25868	4.26774e-99	-5.85067	PREDICTED: pollen-specific protein SF21 [Vitis vinifera]
gene15973	2.38854e-07	-3.5576	PREDICTED: dynamin-like protein ARC5 [Vitis vinifera]
gene21783	4.34662e-18	-3.98252	protein kinase [Malus domestica]
gene25411	1.36551e-18	-6.05441	PREDICTED: vignain [Populus euphratica]
gene11486	1.11218e-52	#NAME?	PREDICTED: protein ECERIFERUM 26-like [Prunus mume]
gene42759	1.09063e-06	-2.70578	Low affinity sulfate transporter 3 family protein [Populus trichocarpa]
Walnut_newGene_970	2.1638e-05	3.17278	PREDICTED: agamous-like MADS-box protein AGL16-like [Citrus sinensis]
gene20863	1.37046e-22	#NAME?	hypothetical protein JCGZ_19060 [Jatropha curcas]
gene30210	3.67868e-18	-6.19299	hypothetical protein CICLE_v10025088mg [Citrus clementina]
gene19332	2.94784e-27	-4.95721	hypothetical protein PRUPE_ppa004271mg [Prunus persica]
gene36259	6.15698e-12	-4.10461	conserved hypothetical protein [Ricinus communis]
Walnut_newGene_4747	9.76417e-27	#NAME?	PREDICTED: uncharacterized protein LOC101314600 isoform 1 [Fragaria vesca subsp. vesca]
gene14823	1.88819e-09	-7.53401	PREDICTED: expansin-like A2 [Populus euphratica]
gene34473	9.40068e-21	-6.16568	PREDICTED: B3 domain-containing protein At2g36080-like [Vitis vinifera]
gene12226	4.16245e-102	2.98523	PREDICTED: protein PHR1-LIKE 1-like [Malus domestica]
gene36546	1.37419e-05	3.24435	Galacturonosyltransferase-like 10 [Theobroma cacao]
gene11908	1.0297e-06	2.83475	PREDICTED: cystinosin homolog [Eucalyptus grandis]
gene11438	9.2988e-10	2.00678	hypothetical protein PRUPE_ppa022316mg [Prunus persica]
gene15380	8.43608e-05	2.11023	PREDICTED: cell cycle checkpoint control protein RAD9A isoform X2 [Malus domestica]
gene35322	1.8997e-12	2.47236	PREDICTED: uncharacterized protein LOC104426502 [Eucalyptus grandis]
gene6237	1.03421e-09	-3.05992	ENTH/VHS family protein [Theobroma cacao]
Walnut_newGene_6444	7.0528e-06	Inf	Os05g0491100 [Oryza sativa Japonica Group]
gene8355	9.29142e-94	-2.95322	PREDICTED: protein STRUBBELIG-RECEPTOR FAMILY 7 [Prunus mume]
gene26201	1.01792e-14	6.62207	PREDICTED: GDSL esterase/lipase At5g03610 isoform X2 [Vitis vinifera]
gene40334	1.71268e-215	5.7019	PREDICTED: uncharacterized protein LOC103963301 [Pyrus x bretschneideri]
gene22773	1.31195e-08	-2.97815	hypothetical protein AMTR_s00119p00071880 [Amborella trichopoda]
gene16004	5.48621e-10	-10.3039	PREDICTED: 2-succinylbenzoate--CoA ligase, chloroplastic/peroxisomal-like isoform X1 [Populus euphratica]
Walnut_newGene_4115	7.1038e-27	Inf	PREDICTED: NEDD8 ultimate buster 1 [Malus domestica]
gene33023	3.35532e-05	-2.65827	Leucine-rich receptor-like protein kinase family protein, putative [Theobroma cacao]
gene11739	2.40491e-15	-5.13674	PREDICTED: tetraketide alpha-pyrone reductase 1-like [Vitis vinifera]
gene38880	1.79154e-08	-4.22037	Aquaporin sip2.1, putative [Theobroma cacao]
Walnut_newGene_6055	1.43978e-19	Inf	PREDICTED: cellulose synthase-like protein E6 [Vitis vinifera]
gene12142	4.09185e-199	5.50108	PREDICTED: uncharacterized protein LOC101306460 [Fragaria vesca subsp. vesca]
gene41713	5.60754e-21	4.11465	protein binding protein, putative [Ricinus communis]
gene28142	2.21245e-23	-3.0253	dtdp-glucose 4-6-dehydratase, putative [Ricinus communis]
gene7532	2.07469e-14	-3.51371	PREDICTED: uncharacterized protein LOC100253604 [Vitis vinifera]
gene36712	1.47406e-29	-5.85614	hypothetical protein POPTR_0019s13150g [Populus trichocarpa]
gene38701	1.18961e-16	6.93345	conserved hypothetical protein [Ricinus communis]
Walnut_newGene_989	1.14063e-51	2.68525	PREDICTED: CBL-interacting serine/threonine-protein kinase 7-like [Cucumis sativus]
gene32061	5.49111e-24	-4.33305	uncharacterized protein LOC100500427 [Glycine max]
gene24807	1.31029e-21	-3.6047	PREDICTED: uncharacterized protein LOC100246848 [Vitis vinifera]
gene14808	9.70719e-08	-4.0404	PREDICTED: uncharacterized protein LOC100252183 [Vitis vinifera]
gene31543	8.75273e-16	-8.12749	PREDICTED: protein ODORANT1 [Vitis vinifera]
gene223	0.000211944	-2.53119	Leucine-rich repeat (LRR) family protein [Theobroma cacao]
gene13005	0.000269911	-3.12913	endo-beta-1,4-glucanase [Prunus persica]
gene23238	7.936e-10	-5.01878	hypothetical protein JCGZ_15611 [Jatropha curcas]
gene40218	4.82393e-56	4.88091	Coatomer epsilon subunit isoform 1 [Theobroma cacao]
gene32890	5.61685e-13	-3.95412	PREDICTED: ribonuclease 3-like [Prunus mume]
gene13436	3.04894e-114	3.49302	hypothetical protein CISIN_1g0034891mg, partial [Citrus sinensis]
gene23856	2.67705e-96	-9.55803	PREDICTED: uncharacterized protein LOC105132228 [Populus euphratica]
gene26472	4.15493e-14	#NAME?	Late embryogenesis abundant hydroxyproline-rich glycoprotein family, putative [Theobroma cacao]
gene12479	2.06855e-81	-5.903	PREDICTED: probable xyloglucan glycosyltransferase 5 [Vitis vinifera]
gene20204	7.70858e-25	4.78998	hypothetical protein POPTR_0002s210401g, partial [Populus trichocarpa]
gene15776	7.76374e-06	-2.79782	hypothetical protein CICLE_v10016641mg [Citrus clementina]
gene39210	3.63961e-07	-2.77492	hypothetical protein L484_017174 [Morus notabilis]
gene8013	4.88979e-14	#NAME?	Glyceraldehyde-3-phosphate dehydrogenase [Gossypium arboreum]
gene38178	8.44278e-41	3.28214	Cytochrome P450 94A1 [Morus notabilis]
gene21309	1.27005e-19	7.91867	Chloroplast beta-amylase isoform 1 [Theobroma cacao]
gene29549	3.24058e-36	-3.57605	PREDICTED: uncharacterized protein LOC103319614 [Prunus mume]
gene37936	1.57515e-10	2.6393	dioxygenase family protein [Populus trichocarpa]
gene16694	1.28291e-140	-9.16515	unnamed protein product [Coffea canephora]
gene684	1.07615e-08	3.46598	WRKY71 [Vitis amurensis]
gene41908	7.42398e-11	-5.00555	PREDICTED: serine/threonine-protein kinase Nek6 [Vitis vinifera]
gene25252	1.83908e-147	-5.40757	hypothetical protein JCGZ_17335 [Jatropha curcas]
gene29731	2.41666e-25	-5.26021	PREDICTED: probable quinone oxidoreductase-like [Glycine max]
gene29142	1.55711e-06	4.05282	Exocyst subunit exo70 family protein H4 [Theobroma cacao]
gene11115	1.44037e-27	-5.92758	hypothetical protein PRUPE_ppa001671mg [Prunus persica]
Walnut_newGene_591	1.44785e-27	4.14916	PREDICTED: beta-amyrin 28-oxidase-like [Eucalyptus grandis]
gene14335	1.28911e-09	-2.8645	hypothetical protein PRUPE_ppa005188mg [Prunus persica]
gene35725	1.21362e-06	-9.30931	PREDICTED: laccase-12-like [Malus domestica]
gene14835	5.95754e-11	-5.98302	PREDICTED: tumor necrosis factor ligand superfamily member 6 [Populus euphratica]
gene34092	1.62256e-05	#NAME?	PREDICTED: uncharacterized protein LOC103422926 [Malus domestica]
gene22204	4.44817e-07	-2.11528	Methylenetetrahydrofolate reductase [Cucumis sativus]
gene32309	1.48762e-10	-2.58034	hypothetical protein PRUPE_ppa013043mg [Prunus persica]
gene12075	3.54025e-11	-2.59062	PREDICTED: chromosome-associated kinesin KIF4A-like isoform X2 [Vitis vinifera]
gene41758	1.07426e-12	-2.87727	hypothetical protein CICLE_v10004755mg [Citrus clementina]
gene30397	4.68066e-19	-5.22961	Cytochrome P450 71A1 [Theobroma cacao]
gene459	9.60356e-09	Inf	hypothetical protein CISIN_1g041217mg [Citrus sinensis]
gene4769	5.54056e-08	-3.31684	hypothetical protein JCGZ_07079 [Jatropha curcas]
gene8978	1.33581e-87	4.18873	WRKY family transcription factor, putative [Theobroma cacao]
gene2180	3.14007e-51	-2.2845	hypothetical protein L484_004969 [Morus notabilis]
gene24309	2.65276e-34	2.08256	plastid jasmonates ZIM-domain protein [Hevea brasiliensis]
gene33835	3.0641e-13	-2.71673	PREDICTED: probable beta-1,3-galactosyltransferase 19-like [Cucumis sativus]
gene15241	7.17838e-08	-2.42603	unnamed protein product [Vitis vinifera]
gene35723	4.10844e-80	3.52007	PREDICTED: abscisic acid receptor PYL4-like [Nicotiana tomentosiformis]
gene32971	3.41668e-116	-7.93559	hypothetical protein L484_027443 [Morus notabilis]
gene41039	2.5507e-08	#NAME?	PREDICTED: receptor-like protein 12 [Prunus mume]
gene6677	1.65871e-12	-2.19584	PREDICTED: probable inactive leucine-rich repeat receptor-like protein kinase At1g66830 [Prunus mume]
gene31662	3.2431e-07	-2.17503	PREDICTED: monocopper oxidase-like protein SKS1 [Prunus mume]
gene35054	1.67181e-15	#NAME?	PREDICTED: probable receptor-like serine/threonine-protein kinase At5g57670 isoform X2 [Populus euphratica]
gene11727	2.35927e-20	3.41859	PREDICTED: peptide methionine sulfoxide reductase B5-like [Pyrus x bretschneideri]
gene35988	1.08988e-11	-4.39058	phopholipase d alpha, putative [Ricinus communis]
gene16028	4.99005e-16	-2.86269	PREDICTED: transcription factor bHLH74 isoform X2 [Prunus mume]
gene20615	1.74006e-07	-4.94749	PREDICTED: probable chlorophyll(ide) b reductase NYC1, chloroplastic [Prunus mume]
gene18773	5.06783e-150	-3.78882	PREDICTED: two-pore potassium channel 1 [Populus euphratica]
gene27534	1.11905e-13	Inf	Contains 3 PF|00400 WD40, G-beta repeat domains [Arabidopsis thaliana]
gene21517	1.1706e-09	#NAME?	PREDICTED: uncharacterized protein LOC103949899 isoform X2 [Pyrus x bretschneideri]
Walnut_newGene_6977	1.50534e-13	#NAME?	PREDICTED: root phototropism protein 2 isoform X1 [Vitis vinifera]
gene12417	1.45427e-78	-4.4969	hypothetical protein JCGZ_07757 [Jatropha curcas]
gene5487	9.14883e-06	-9.33172	PREDICTED: uncharacterized protein LOC100252479 [Vitis vinifera]
gene13804	7.21484e-05	-2.551	PREDICTED: cyclin-A2-4-like isoform X1 [Populus euphratica]
gene31799	5.73364e-28	4.18289	Cytochrome P450 82A3 [Morus notabilis]
gene38248	1.22191e-45	-4.89375	heat shock protein 17.7 [Populus trichocarpa]
gene22382	8.41755e-12	Inf	hypothetical protein PRUPE_ppa024790mg, partial [Prunus persica]
Walnut_newGene_4418	2.74842e-15	Inf	AAA-type ATPase family protein / ankyrin repeat family protein isoform 1 [Theobroma cacao]
gene9394	1.0752e-57	2.15655	PREDICTED: proline-rich receptor-like protein kinase PERK1 [Vitis vinifera]
gene32725	5.34783e-50	Inf	PREDICTED: disease resistance protein At4g27190-like isoform X1 [Citrus sinensis]
gene4390	2.12675e-67	3.49214	Pyrimidine 2 isoform 1 [Theobroma cacao]
Walnut_newGene_1731	1.76593e-05	2.90354	PREDICTED: probable LRR receptor-like serine/threonine-protein kinase RFK1-like [Citrus sinensis]
gene10790	9.47416e-13	-7.18031	PREDICTED: U-box domain-containing protein 62-like [Malus domestica]
gene18876	5.67155e-77	Inf	hypothetical protein POPTR_0005s05830g [Populus trichocarpa]
gene15857	7.89411e-07	-7.67259	PREDICTED: heavy metal-associated isoprenylated plant protein 26 [Cucumis melo]
gene20485	0.00055827	-2.04141	l-allo-threonine aldolase, putative [Ricinus communis]
gene34508	3.69896e-17	-2.81082	PREDICTED: cysteine-rich repeat secretory protein 3-like [Cucumis melo]
gene21357	8.47378e-60	#NAME?	PREDICTED: probable pectate lyase 4 [Prunus mume]
gene7888	2.6906e-24	3.27569	hypothetical protein CICLE_v10005526mg [Citrus clementina]
gene17442	5.87702e-12	-5.42793	hypothetical protein JCGZ_13288 [Jatropha curcas]
gene39477	1.40968e-13	-10.3599	cellulose synthase [Betula luminifera]
Walnut_newGene_4069	8.14718e-57	Inf	Adenine nucleotide alpha hydrolases-like superfamily protein isoform 1 [Theobroma cacao]
gene23015	4.31624e-41	-3.27945	PREDICTED: probable RNA helicase SDE3 [Populus euphratica]
gene2226	0	8.00792	cytochrome P450, putative [Ricinus communis]
gene30975	1.39222e-08	-6.05795	PREDICTED: zinc finger CCCH domain-containing protein 2 [Populus euphratica]
gene37943	3.02099e-24	-4.14327	Nine-cis-epoxycarotenoid dioxygenase 3 [Theobroma cacao]
Walnut_newGene_1763	0.000263199	-2.41725	Kinesin-4 -like protein [Gossypium arboreum]
Walnut_newGene_2911	3.91202e-18	#NAME?	Pyrophosphate--fructose 6-phosphate 1-phosphotransferase subunit beta [Gossypium arboreum]
[truncated: 2,570 more rows]

## Sheet: RPvsNP
Differentially expressed genes (DEGs) and their Nr annotation in RPvsNP
ID	FDR	log2FC	NR_annotation
gene3023	2.11206e-72	-2.2383	conserved hypothetical protein [Ricinus communis]
gene8940	9.06604e-28	3.42631	PREDICTED: protein ASPARTIC PROTEASE IN GUARD CELL 1 [Malus domestica]
gene35072	1.10882e-15	8.38857	Salicylate O-methyltransferase [Theobroma cacao]
gene21521	2.07257e-27	-2.06102	PREDICTED: TMV resistance protein N-like [Glycine max]
gene35704	2.24042e-30	2.30413	hypothetical protein PRUPE_ppa010134mg [Prunus persica]
gene17727	4.15216e-243	-10.3814	hypothetical protein PRUPE_ppa013836mg [Prunus persica]
gene29936	1.16079e-09	2.24406	PREDICTED: copper transporter 1-like [Fragaria vesca subsp. vesca]
gene4706	2.23022e-12	#NAME?	hypothetical protein POPTR_0004s05190g, partial [Populus trichocarpa]
gene1139	0.000146858	2.23395	GHMYB10, putative [Theobroma cacao]
gene13967	3.97859e-05	-2.72245	PREDICTED: glucan endo-1,3-beta-D-glucosidase [Vitis vinifera]
gene36090	1.60898e-34	-2.46556	SAUR family protein [Theobroma cacao]
gene15858	2.07617e-173	-3.37533	Aspartic proteinase nepenthesin-1 precursor, putative [Ricinus communis]
gene36563	1.0683e-52	-3.83241	PREDICTED: senescence-associated carboxylesterase 101-like [Citrus sinensis]
gene30725	2.77923e-06	-3.47951	hypothetical protein PRUPE_ppa012756mg [Prunus persica]
gene31353	2.15721e-129	-2.91481	PREDICTED: allene oxide cyclase 4, chloroplastic-like [Fragaria vesca subsp. vesca]
gene8779	1.09093e-153	-9.03618	Magnesium-protoporphyrin IX monomethyl ester [oxidative] cyclase [Morus notabilis]
gene35191	0.000834717	3.21894	PREDICTED: MLP-like protein 43-like [Fragaria vesca subsp. vesca]
gene42692	1.94831e-09	2.9339	PREDICTED: ABC transporter C family member 10-like [Pyrus x bretschneideri]
gene13333	1.19367e-68	-2.90805	PREDICTED: protein trichome birefringence-like 10 [Pyrus x bretschneideri]
Walnut_newGene_3973	3.43236e-14	2.16662	PREDICTED: phosphatidylinositol transfer protein 1-like isoform X3 [Vitis vinifera]
gene22032	2.13483e-07	2.09613	LRR and NB-ARC domains-containing disease resistance protein, putative [Theobroma cacao]
gene7736	8.39446e-07	2.81856	DNA replication complex GINS protein PSF3 [Medicago truncatula]
gene10094	7.01016e-35	2.89591	PREDICTED: F-box/LRR-repeat protein 3 [Prunus mume]
Walnut_newGene_324	1.44061e-05	Inf	unknown [Populus trichocarpa]
gene4793	1.64064e-45	5.02827	PREDICTED: probable receptor-like protein kinase At1g67000 [Prunus mume]
Walnut_newGene_5891	1.20711e-119	#NAME?	PREDICTED: structural maintenance of chromosomes protein 4-like isoform X1 [Glycine max]
gene40364	5.7732e-297	-5.07715	hypothetical protein JCGZ_20650 [Jatropha curcas]
gene27984	3.28182e-34	-2.14573	PREDICTED: ubiquitin-like protein 5 [Nelumbo nucifera]
gene25577	1.78476e-10	2.22412	LOB domain-containing 4 -like protein [Gossypium arboreum]
gene22765	2.97433e-06	4.02759	Kinase family protein / peptidoglycan-binding LysM domain-containing protein, putative [Theobroma cacao]
gene11030	2.65333e-34	4.29323	PREDICTED: dirigent protein 2-like [Prunus mume]
gene39966	1.46635e-68	-2.63767	PREDICTED: cellulose synthase-like protein E6 isoform X1 [Vitis vinifera]
gene42376	5.14821e-15	-4.09327	PREDICTED: probable LRR receptor-like serine/threonine-protein kinase At4g08850 [Vitis vinifera]
gene42439	7.93402e-18	-2.66315	Calcium-dependent lipid-binding family protein [Theobroma cacao]
gene23664	1.16888e-61	Inf	PREDICTED: 39S ribosomal protein L41-A, mitochondrial-like [Nelumbo nucifera]
gene16418	1.60554e-50	-3.03119	PREDICTED: uncharacterized protein LOC103341962 [Prunus mume]
gene22942	2.90893e-10	-6.2474	Ribosomal protein S24e family protein [Theobroma cacao]
gene4955	3.42174e-07	-2.11341	hypothetical protein L484_013156 [Morus notabilis]
gene1621	3.5259e-42	-2.99957	S-locus lectin protein kinase family protein, putative [Theobroma cacao]
gene6017	4.0832e-54	2.51715	Chain A family protein [Populus trichocarpa]
gene30873	1.71403e-133	#NAME?	Major pollen allergen Ory s 1 precursor, putative [Ricinus communis]
gene33781	4.81398e-125	-2.85232	hypothetical protein PRUPE_ppa013029mg [Prunus persica]
gene28113	7.89393e-151	-3.57078	PREDICTED: G-type lectin S-receptor-like serine/threonine-protein kinase B120 [Prunus mume]
gene13866	0.000288468	2.79005	PREDICTED: uncharacterized protein LOC100249766 [Vitis vinifera]
gene18670	2.02173e-11	-5.04222	PREDICTED: protein PHLOEM PROTEIN 2-LIKE A6-like [Solanum tuberosum]
gene21944	0	-11.1547	PREDICTED: 60S ribosomal protein L7-2-like [Nelumbo nucifera]
gene27958	4.8069e-60	-5.58431	DELLA protein DWARF8, putative [Ricinus communis]
gene9710	3.08837e-10	-2.5678	hypothetical protein PRUPE_ppa010064mg [Prunus persica]
gene40666	1.41146e-05	-3.06319	PREDICTED: uncharacterized protein LOC104610653 [Nelumbo nucifera]
gene10700	2.40196e-11	-2.71825	PREDICTED: uncharacterized protein At4g00950 [Prunus mume]
gene32062	3.10998e-84	-3.19655	unnamed protein product [Vitis vinifera]
gene5999	0.00015631	2.2845	PREDICTED: uncharacterized protein LOC101306742 [Fragaria vesca subsp. vesca]
gene19071	8.35497e-08	3.75443	Alba DNA/RNA-binding protein [Theobroma cacao]
gene33523	1.8665e-78	5.94021	Stabilizer of iron transporter SufD / Polynucleotidyl transferase isoform 1 [Theobroma cacao]
gene20098	2.19725e-15	#NAME?	PREDICTED: probable LRR receptor-like serine/threonine-protein kinase At4g08850 [Eucalyptus grandis]
gene28270	4.51784e-42	-3.39096	hypothetical protein PRUPE_ppa018836mg [Prunus persica]
Walnut_newGene_3903	7.90352e-82	7.09053	unnamed protein product [Vitis vinifera]
gene12172	6.01251e-21	#NAME?	Nitrate transporter 1.5 [Theobroma cacao]
gene31790	4.63672e-38	-2.48405	PREDICTED: uncharacterized protein LOC105116532 [Populus euphratica]
gene14191	3.50385e-37	#NAME?	PREDICTED: G-type lectin S-receptor-like serine/threonine-protein kinase RLK1 [Prunus mume]
gene17385	7.8738e-34	8.13485	PREDICTED: putative alpha-xylosidase 2 [Prunus mume]
gene20412	3.12675e-59	-2.63013	JAZ8 [Hevea brasiliensis]
Walnut_newGene_2731	1.2565e-10	4.36001	PREDICTED: uncharacterized protein LOC105121770 [Populus euphratica]
gene31282	2.7953e-08	-2.75777	hypothetical protein POPTR_0009s12450g, partial [Populus trichocarpa]
gene34242	1.06941e-150	4.21574	hypothetical protein PRUPE_ppa007323mg [Prunus persica]
gene35713	4.08703e-18	-2.73888	PREDICTED: uncharacterized protein At5g39865-like [Malus domestica]
gene20040	1.08989e-21	2.37942	PREDICTED: uncharacterized protein LOC105136745 isoform X1 [Populus euphratica]
gene31535	1.8171e-95	-2.25057	hypothetical protein L484_006392 [Morus notabilis]
gene20031	1.58753e-57	-7.09715	cyclin-dependent kinase [Juglans nigra x Juglans regia]
gene28189	4.89089e-28	2.70979	PREDICTED: probable receptor-like protein kinase At1g67000 [Vitis vinifera]
gene10002	1.31426e-28	-2.15028	PREDICTED: uncharacterized protein LOC101294772 isoform 1 [Fragaria vesca subsp. vesca]
gene40552	5.99602e-227	-3.94574	Kinase, putative [Theobroma cacao]
gene29185	8.7492e-19	-2.0086	hypothetical protein L484_014999 [Morus notabilis]
gene35491	7.60236e-45	-3.49415	glycosyltransferase family GT8 protein [Populus deltoides]
gene7075	3.63712e-14	-5.3645	hypothetical protein PRUPE_ppa008058mg [Prunus persica]
gene23578	2.24737e-08	Inf	hypothetical protein POPTR_0012s08770g [Populus trichocarpa]
gene5276	5.20812e-92	-8.7717	hypothetical protein EUGRSUZ_H04787 [Eucalyptus grandis]
gene16353	2.77757e-23	-3.65707	RING/U-box superfamily protein, putative [Theobroma cacao]
gene25150	6.88341e-63	-2.45936	WRKY family transcription factor [Theobroma cacao]
gene27135	3.02671e-13	Inf	PREDICTED: protein GPR107-like [Citrus sinensis]
gene75	0.000128971	-2.44744	PREDICTED: ferric reduction oxidase 7, chloroplastic-like [Fragaria vesca subsp. vesca]
gene4338	2.60503065684475e-313	7.35149	PREDICTED: protein MIZU-KUSSEI 1 [Vitis vinifera]
gene11179	2.29024e-16	4.31174	hypothetical protein PRUPE_ppa006766mg [Prunus persica]
gene25282	2.63698e-14	2.82338	Salicylate O-methyltransferase [Gossypium arboreum]
gene23815	0	#NAME?	PREDICTED: probable inactive receptor-like protein kinase At1g65250 [Vitis vinifera]
gene26630	0	-6.49332	PREDICTED: uncharacterized protein LOC101514713 [Cicer arietinum]
gene41459	8.24533e-229	-3.90283	PREDICTED: mitochondrial uncoupling protein 5-like [Cucumis sativus]
gene35754	7.2332e-14	-3.05587	PREDICTED: adenine/guanine permease AZG1 [Prunus mume]
gene39347	4.69576e-140	-4.81948	PREDICTED: 3-ketoacyl-CoA synthase 19-like [Eucalyptus grandis]
gene39489	4.25789e-24	-3.17918	PREDICTED: uncharacterized protein LOC104602750 [Nelumbo nucifera]
gene24442	9.18014e-13	-5.0475	hypothetical protein CICLE_v10003321mg, partial [Citrus clementina]
gene3571	8.98069e-08	-2.61483	hypothetical protein L484_017843 [Morus notabilis]
gene7433	1.51532e-171	-5.75886	Nudix hydrolase 17 [Morus notabilis]
gene30983	1.83399e-145	3.97014	Leucine-rich repeat protein kinase family protein isoform 2 [Theobroma cacao]
gene25021	5.08387e-09	4.13539	Cellulose synthase like G2, putative [Theobroma cacao]
gene36001	2.76585e-10	3.82653	Auxin-responsive IAA29 -like protein [Gossypium arboreum]
gene25332	0.000165811	3.42175	hypothetical protein POPTR_0003s13110g [Populus trichocarpa]
gene36691	2.6024e-12	#NAME?	hypothetical protein JCGZ_11047 [Jatropha curcas]
gene32176	2.08536e-65	-2.83096	PREDICTED: receptor-like protein kinase FERONIA [Prunus mume]
gene38325	5.28672e-11	-6.36363	Bet v 1 allergen [Quercus suber]
gene25770	6.97871e-98	-3.82727	PREDICTED: leucine-rich repeat receptor protein kinase EXS-like isoform X1 [Vitis vinifera]
gene5996	8.88314e-157	10.6044	PREDICTED: sugar transporter ERD6-like 5 isoform X1 [Prunus mume]
gene1383	1.41859e-14	2.51346	PREDICTED: nitrate transporter 1.1-like [Citrus sinensis]
gene9685	5.1415e-32	7.00585	PREDICTED: putative E3 ubiquitin-protein ligase LIN [Vitis vinifera]
gene3030	0.000129123	2.90098	Uncharacterized protein TCM_005888 [Theobroma cacao]
gene24661	2.27457e-16	#NAME?	PREDICTED: leucine-rich repeat receptor protein kinase EXS-like [Vitis vinifera]
gene41721	2.86529e-142	-2.82526	hypothetical protein CICLE_v10012062mg [Citrus clementina]
gene17215	5.45212e-53	-2.885	hypothetical protein PRUPE_ppa003787mg [Prunus persica]
gene12826	1.43023e-69	-2.31483	putative beta-D-xylosidase 2 -like protein [Gossypium arboreum]
gene10969	2.55895e-10	#NAME?	PREDICTED: graves disease carrier protein [Vitis vinifera]
gene26786	1.31919e-74	-2.13209	IAA-amino acid hydrolase [Populus tomentosa]
gene13631	4.20285e-08	3.1517	PREDICTED: syntaxin-22-like [Solanum lycopersicum]
gene42051	1.09995e-24	2.25001	hypothetical protein JCGZ_26298 [Jatropha curcas]
gene40807	0	-10.7422	hypothetical protein PRUPE_ppa025692mg [Prunus persica]
gene29333	1.20356e-227	-3.76195	PREDICTED: ferrochelatase-2, chloroplastic [Vitis vinifera]
gene33131	6.41501e-132	#NAME?	PREDICTED: 39S ribosomal protein L41-A, mitochondrial-like [Nelumbo nucifera]
gene17343	1.62975e-133	10.3413	PREDICTED: uncharacterized protein LOC104595663 [Nelumbo nucifera]
gene40933	5.41263e-32	-3.23992	tubulin alpha chain, putative [Ricinus communis]
gene27955	2.01377e-20	-7.33415	PREDICTED: uncharacterized protein LOC105137629 [Populus euphratica]
gene22684	3.24722e-13	-2.35349	PREDICTED: TMV resistance protein N-like [Pyrus x bretschneideri]
gene26590	1.25532e-77	#NAME?	PREDICTED: zinc finger protein 62-like [Malus domestica]
gene5102	1.54437e-28	-2.39653	PREDICTED: RNA-binding protein 24 isoform X1 [Vitis vinifera]
Walnut_newGene_7036	4.08535e-20	#NAME?	TPA: hypothetical protein ZEAMMB73_660666 [Zea mays]
gene4529	4.95164e-21	-2.08983	PREDICTED: nudix hydrolase 2-like [Pyrus x bretschneideri]
gene25367	4.25466e-102	-2.59789	Proline-rich receptor-like protein kinase PERK1 [Glycine soja]
gene17483	1.16874e-05	2.92791	hypothetical protein PRUPE_ppa015651mg [Prunus persica]
gene3884	6.0846e-10	-2.99743	PREDICTED: probable serine/threonine-protein kinase At1g54610 [Prunus mume]
gene22059	6.11803e-13	#NAME?	hypothetical protein PRUPE_ppa001576mg [Prunus persica]
Walnut_newGene_3459	3.24498e-32	Inf	PREDICTED: uncharacterized protein LOC104604536 [Nelumbo nucifera]
gene28615	4.88129e-40	#NAME?	PREDICTED: TMV resistance protein N-like [Pyrus x bretschneideri]
gene31272	1.05039e-17	-2.1233	hypothetical protein POPTR_0001s01730g [Populus trichocarpa]
gene14216	1.04317e-10	#NAME?	hypothetical protein PHAVU_008G014700g [Phaseolus vulgaris]
gene23086	1.00785e-211	-3.65371	Synaptosomal associated protein, putative [Theobroma cacao]
gene16684	9.79712e-290	-5.90899	PREDICTED: somatic embryogenesis receptor kinase 1-like [Prunus mume]
gene17810	6.94578e-75	4.33897	hypothetical protein CICLE_v10002961mg [Citrus clementina]
gene36871	2.39762e-08	2.99364	PREDICTED: F-box protein At5g07610-like [Brachypodium distachyon]
gene41701	1.51089e-95	#NAME?	PREDICTED: tropinone reductase homolog At1g07440-like [Eucalyptus grandis]
gene30509	2.99073e-27	4.08448	Homeobox 7, putative [Theobroma cacao]
gene19302	2.1373e-19	#NAME?	PREDICTED: UDP-glycosyltransferase 89A2-like [Malus domestica]
gene475	1.03925e-08	2.01638	PREDICTED: adenylate kinase 5, chloroplastic [Nelumbo nucifera]
gene14338	2.56776e-60	-7.05562	PREDICTED: uncharacterized protein LOC103449856 [Malus domestica]
gene11523	4.44957e-201	-3.44406	conserved hypothetical protein [Ricinus communis]
gene14825	2.67227e-25	-2.82376	PREDICTED: cytokinin riboside 5&apos;-monophosphate phosphoribohydrolase LOG5 [Prunus mume]
gene10157	2.85449e-90	-4.43561	PREDICTED: uncharacterized protein LOC103454490 [Malus domestica]
gene42777	6.08701e-51	#NAME?	F-box/RNI-like superfamily protein isoform 3 [Theobroma cacao]
gene4196	6.48756e-17	-7.04067	PREDICTED: probable LRR receptor-like serine/threonine-protein kinase At3g47570 [Prunus mume]
gene37162	1.62784e-33	-3.34852	hypothetical protein JCGZ_11773 [Jatropha curcas]
gene11426	1.22624e-55	-2.0405	hypothetical protein PRUPE_ppa004285mg [Prunus persica]
gene29257	7.98897e-90	-3.02627	heat-shock protein, putative [Ricinus communis]
gene12743	5.6152e-05	4.18536	Dehydrodolichyl diphosphate synthase 2 [Morus notabilis]
gene29472	0	-5.98344	hypothetical protein PRUPE_ppa002146mg [Prunus persica]
gene23500	1.47475e-11	2.32954	Extended synaptotagmin-3 [Gossypium arboreum]
gene11608	5.71583e-06	-3.44027	Serine carboxypeptidase-like 42 isoform 3, partial [Theobroma cacao]
gene32386	1.29141e-05	2.35686	Uncharacterized protein isoform 2 [Theobroma cacao]
gene10659	1.5545e-131	-3.02303	Phospholipase A21 [Theobroma cacao]
gene20158	2.61404e-53	-8.87326	PREDICTED: uncharacterized protein LOC101496078 [Cicer arietinum]
gene22264	0	-7.76278	hypothetical protein CICLE_v10003574mg, partial [Citrus clementina]
gene24478	1.17322e-61	#NAME?	hypothetical protein PRUPE_ppa025692mg [Prunus persica]
gene8477	2.85007e-79	-2.08485	PREDICTED: zinc transporter 4, chloroplastic-like isoform X1 [Pyrus x bretschneideri]
gene17378	7.67235e-08	2.17105	Copper transporter, putative [Theobroma cacao]
gene26863	8.2276e-11	-2.80618	Uncharacterized protein TCM_002397 [Theobroma cacao]
gene30422	3.49976e-08	3.36103	PREDICTED: (S)-scoulerine 9-O-methyltransferase [Vitis vinifera]
gene11529	8.12149e-37	-2.47714	RAB GTPase A5B [Theobroma cacao]
gene13017	1.48343e-08	-4.07186	PREDICTED: BTB/POZ domain-containing protein At3g22104 isoform X1 [Prunus mume]
gene14812	5.45789e-06	2.28118	PREDICTED: NAD(P)H-quinone oxidoreductase subunit M, chloroplastic [Vitis vinifera]
Walnut_newGene_5466	1.47246e-37	4.78331	hypothetical protein VITISV_026680 [Vitis vinifera]
gene3152	9.97011e-09	-2.08287	hypothetical protein JCGZ_24539 [Jatropha curcas]
gene26260	5.23094e-92	#NAME?	hypothetical protein L484_014312 [Morus notabilis]
gene30463	5.25307e-30	-2.05051	PREDICTED: vacuolar amino acid transporter 1-like isoform X1 [Citrus sinensis]
gene41823	1.07597e-05	2.31806	PREDICTED: MADS-box protein SOC1-like [Vitis vinifera]
gene26878	2.13171e-112	-2.78809	hypothetical protein JCGZ_21220 [Jatropha curcas]
gene22098	7.35078e-09	-4.35822	PREDICTED: ankyrin repeat-containing protein At2g01680-like [Glycine max]
gene13076	1.23221e-96	-9.81489	PREDICTED: lysM domain-containing GPI-anchored protein 2 [Vitis vinifera]
gene10516	1.99198e-136	-7.88989	PREDICTED: uncharacterized protein LOC103335901 [Prunus mume]
gene30870	3.10009e-11	Inf	PREDICTED: beta-glucosidase 12-like [Fragaria vesca subsp. vesca]
gene37068	1.40481e-115	-2.46687	PREDICTED: uncharacterized protein LOC101311428 [Fragaria vesca subsp. vesca]
Walnut_newGene_4793	3.05978e-05	-2.06855	PREDICTED: uncharacterized protein LOC104597668 [Nelumbo nucifera]
gene16119	6.27957e-23	-3.10279	Late embryogenesis abundant (LEA) hydroxyproline-rich glycoprotein family, putative [Theobroma cacao]
gene32437	1.30428e-41	-2.1278	ef-hand calcium binding protein, putative [Ricinus communis]
gene35628	1.0768e-39	-3.03832	PREDICTED: uncharacterized protein LOC100256408 [Vitis vinifera]
gene30760	6.69428e-35	2.04204	hypothetical protein JCGZ_14241 [Jatropha curcas]
gene28387	1.66291e-12	#NAME?	hypothetical protein PRUPE_ppa003591mg [Prunus persica]
gene12557	3.9375e-148	-2.88422	putative Cys2-His2 zinc finger transcription factor [Juglans regia]
Walnut_newGene_3550	9.75902e-10	2.04491	Arginyl-tRNA synthetase, class Ic isoform 1 [Theobroma cacao]
gene32364	3.19901e-249	-4.59774	PREDICTED: uncharacterized protein LOC100253584 [Vitis vinifera]
Walnut_newGene_2303	4.22691e-07	2.3907	PREDICTED: protein FAM63A-like, partial [Cucumis sativus]
gene27287	2.29627e-28	-7.85803	PREDICTED: glycerophosphodiester phosphodiesterase protein kinase domain-containing GDPDL2-like [Vitis vinifera]
gene8183	9.82797e-112	-3.83499	U-box domain-containing protein kinase family protein, putative [Theobroma cacao]
gene32452	2.60055e-07	2.99751	hypothetical protein PRUPE_ppa007229mg [Prunus persica]
gene7739	2.88054e-44	3.54111	hypothetical protein CICLE_v10020563mg [Citrus clementina]
gene14655	1.15642e-19	3.29921	Homeobox from [Theobroma cacao]
Walnut_newGene_5103	1.54316e-14	-5.91347	PREDICTED: cellulose synthase-like protein B4 isoform X1 [Prunus mume]
gene40284	7.40416e-10	2.54443	hypothetical protein L484_011146 [Morus notabilis]
gene36031	1.91865e-87	2.13428	KNAT3-like transcription factor [Juglans nigra]
gene18104	1.87871e-66	-7.22795	PREDICTED: uncharacterized protein LOC103330346 [Prunus mume]
gene9991	1.56854e-16	3.80825	metallothionein-like protein class II [Fagus sylvatica]
gene27391	4.02567e-14	4.38296	PREDICTED: aspartic proteinase PCS1 [Prunus mume]
gene21804	5.60087e-172	-10.7729	PREDICTED: uncharacterized protein LOC104877802 [Vitis vinifera]
Walnut_newGene_1918	6.94037e-13	#NAME?	hypothetical protein JCGZ_16325 [Jatropha curcas]
gene41530	1.80986e-05	-2.49688	hypothetical protein CISIN_1g036938mg [Citrus sinensis]
gene7454	5.85159e-30	-3.40895	PREDICTED: probable receptor protein kinase TMK1-like [Citrus sinensis]
gene10138	3.86815e-133	-2.7408	hypothetical protein PRUPE_ppa005282mg [Prunus persica]
gene28466	3.71822e-58	#NAME?	unnamed protein product [Vitis vinifera]
gene41405	1.20614e-19	-3.09017	Kinase, putative [Theobroma cacao]
gene2411	1.32847e-53	-3.66199	class IV chitinase [Corylus heterophylla]
gene36953	1.08985e-69	9.07311	PREDICTED: DNA-directed RNA polymerase I subunit RPA12 [Pyrus x bretschneideri]
gene38136	5.77082e-11	2.47202	Malectin/receptor protein kinase family protein, putative [Theobroma cacao]
gene2923	3.2753e-26	-2.46832	PREDICTED: pirin-like protein [Vitis vinifera]
gene39381	8.25424e-178	-3.4079	cytochrome P450 CYP94A1 family protein [Populus trichocarpa]
gene20899	7.41029e-75	Inf	hypothetical protein MTR_8g040020 [Medicago truncatula]
gene16583	0	-4.82291	hypothetical protein PRUPE_ppa011478mg [Prunus persica]
gene10093	6.63784e-84	-3.83167	RNI-like superfamily protein [Theobroma cacao]
Walnut_newGene_112	2.34105e-05	2.93249	PREDICTED: zinc finger BED domain-containing protein RICESLEEPER 1-like, partial [Nicotiana sylvestris]
gene28197	5.91419e-12	-2.1853	PREDICTED: myb family transcription factor APL isoform X1 [Vitis vinifera]
Walnut_newGene_5741	7.95983e-23	2.64909	PREDICTED: uncharacterized protein LOC103331119 [Prunus mume]
gene25601	0.000153331	-5.16876	PREDICTED: LRR receptor-like serine/threonine-protein kinase EFR-like [Fragaria vesca subsp. vesca]
gene1078	6.18068e-47	-3.37875	Uncharacterized protein TCM_010809 [Theobroma cacao]
gene32194	2.51563e-70	-2.6564	Solute carrier family 25 member 44 [Gossypium arboreum]
gene21380	1.06353e-240	-3.98227	PREDICTED: UDP-glucuronate 4-epimerase 6 [Malus domestica]
gene20027	6.18671e-90	4.30071	Histone ubiquitination proteins group [Theobroma cacao]
gene20254	1.60069e-10	-4.3497	Aspartic proteinase nepenthesin-1 precursor, putative [Ricinus communis]
gene31821	1.12607e-32	-8.08381	tryptophan decarboxylase [Camptotheca acuminata]
gene7550	4.47085e-09	-5.19107	unnamed protein product [Vitis vinifera]
gene42650	1.30948e-16	-6.103	PREDICTED: uncharacterized protein LOC104880556 [Vitis vinifera]
gene14140	0	-5.38897	PREDICTED: probable choline kinase 1 isoform X1 [Prunus mume]
gene40640	1.07442e-89	-4.71813	hypothetical protein PRUPE_ppa000913mg [Prunus persica]
gene40787	9.14902e-15	#NAME?	PREDICTED: protein EXORDIUM-like 5 [Nelumbo nucifera]
gene20311	1.90159e-22	2.74738	PREDICTED: 7-deoxyloganetic acid glucosyltransferase-like [Populus euphratica]
Walnut_newGene_3863	7.64511e-19	Inf	PREDICTED: pentatricopeptide repeat-containing protein At2g01860 [Prunus mume]
gene2811	1.02097e-55	2.28555	hypothetical protein PRUPE_ppa019338mg [Prunus persica]
gene15010	9.04304e-22	#NAME?	PREDICTED: ethylene-responsive transcription factor ERF020-like [Populus euphratica]
gene16911	4.66399e-06	5.63953	Heavy metal atpase 5 [Theobroma cacao]
gene10796	1.44225e-06	-3.26604	PREDICTED: probable LRR receptor-like serine/threonine-protein kinase At4g08850 isoform X1 [Populus euphratica]
gene21467	4.03173e-05	-2.06993	S-adenosylmethionine-dependent methyltransferase, putative [Ricinus communis]
gene32693	0	-8.12669	Calcium-transporting ATPase 2, plasma membrane-type [Morus notabilis]
gene22507	3.92221e-71	-2.07702	PREDICTED: REF/SRPP-like protein At3g05500 [Eucalyptus grandis]
gene25537	4.38738e-137	-6.32553	hypothetical protein L484_026973 [Morus notabilis]
Walnut_newGene_1475	2.31856e-07	-2.45941	Ribulose bisphosphate carboxylase/oxygenase activase 1, chloroplast precursor, putative [Ricinus communis]
Walnut_newGene_5349	1.54574e-09	-4.45844	Late embryogenesis abundant (LEA) hydroxyproline-rich glycoprotein family, putative [Theobroma cacao]
gene4741	3.98663e-16	4.47831	PREDICTED: patellin-3 [Populus euphratica]
gene24900	5.33075e-15	2.48716	hypothetical protein POPTR_0001s02710g [Populus trichocarpa]
gene8523	0.000359351	-2.18458	hypothetical protein L484_012800 [Morus notabilis]
gene26264	3.83055e-12	-2.86354	PREDICTED: calcium-dependent protein kinase 29-like isoform X1 [Citrus sinensis]
gene4623	4.35571e-39	2.22971	PREDICTED: cation/calcium exchanger 2-like [Populus euphratica]
gene20033	1.4e-11	3.11901	PREDICTED: probable pectate lyase 4 [Prunus mume]
gene31548	2.91657e-120	-2.62657	PapD-like superfamily protein isoform 1 [Theobroma cacao]
gene23251	1.21737e-14	#NAME?	U1 small nuclear ribonucleoprotein A [Morus notabilis]
Walnut_newGene_6669	7.07124e-20	#NAME?	--
gene42418	1.65583e-194	-3.53257	hypothetical protein JCGZ_02157 [Jatropha curcas]
gene32681	1.4913e-161	-8.40533	hypothetical protein POPTR_0012s01380g [Populus trichocarpa]
gene33157	4.48873e-97	-2.46708	PREDICTED: wall-associated receptor kinase-like 8 [Vitis vinifera]
gene26044	1.04137e-08	-2.06883	Hexokinase-like 1 [Theobroma cacao]
gene26360	1.39332e-37	-5.32861	unnamed protein product [Vitis vinifera]
gene31508	4.70859e-14	2.1069	hypothetical protein JCGZ_07374 [Jatropha curcas]
gene320	2.85509e-89	-3.21341	RecName: Full=Calcium-binding allergen Bet v 3; AltName: Full=Allergen Bet v III; AltName: Allergen=Bet v 3 [Betula pendula]
gene23430	8.09725e-05	3.45736	PREDICTED: peroxisomal membrane protein 11B-like [Malus domestica]
gene23008	5.86821e-140	-2.96828	PREDICTED: probable WRKY transcription factor 17 [Nelumbo nucifera]
gene9038	7.27465e-06	8.7151	hypothetical protein PRUPE_ppa008922mg [Prunus persica]
gene1595	7.78487e-95	-3.59448	hypothetical protein L484_018748 [Morus notabilis]
gene20331	1.86946e-28	-3.18764	hypothetical protein VITISV_034074 [Vitis vinifera]
gene34798	1.19283e-104	-5.18022	DREB transcription factor [Corylus heterophylla]
gene15425	2.70605e-13	-3.61387	Pectinesterase-2 precursor, putative [Ricinus communis]
gene23054	1.41349e-10	3.39439	ATP binding protein, putative [Ricinus communis]
gene31299	6.59383e-06	6.36911	Receptor like protein 1, putative [Theobroma cacao]
gene14073	0	-8.24255	Drought-responsive family protein isoform 2 [Theobroma cacao]
gene32407	1.32773e-22	-2.3232	PREDICTED: uncharacterized protein LOC103341137 [Prunus mume]
Walnut_newGene_590	3.6106e-11	Inf	hypothetical protein CISIN_1g046106mg [Citrus sinensis]
gene13712	7.7592e-11	#NAME?	PREDICTED: basic 7S globulin-like [Nelumbo nucifera]
gene13051	7.03477e-08	2.58712	PREDICTED: NADPH-dependent 1-acyldihydroxyacetone phosphate reductase [Vitis vinifera]
gene28976	5.9674e-20	-2.00093	IQ-domain 22, putative [Theobroma cacao]
gene30944	3.65311e-08	-3.24332	GTP-binding family protein [Populus trichocarpa]
gene3117	4.12314e-41	2.68176	PREDICTED: CBL-interacting serine/threonine-protein kinase 4-like [Pyrus x bretschneideri]
gene25789	1.30644e-07	-2.36884	PREDICTED: wall-associated receptor kinase-like 10 [Vitis vinifera]
gene21094	2.27457e-16	#NAME?	PREDICTED: crocetin glucoside glucosyltransferase-like isoform X1 [Vitis vinifera]
gene35719	5.24076e-96	2.31605	Ferritin-3 [Morus notabilis]
gene6616	5.61862e-87	-2.39582	PREDICTED: putative nuclease HARBI1-like [Citrus sinensis]
gene23019	2.1019e-56	-2.16836	Light-sensor Protein kinase [Morus notabilis]
gene26235	1.09987e-28	-4.84888	unnamed protein product [Vitis vinifera]
gene42151	0	-7.49055	PREDICTED: cation/H(+) antiporter 20 [Vitis vinifera]
gene25657	4.33785e-50	-4.2325	PREDICTED: peptidyl-prolyl cis-trans isomerase CWC27 homolog [Prunus mume]
gene34615	4.71618e-11	6.35527	PREDICTED: LRR receptor-like serine/threonine-protein kinase GSO1 [Populus euphratica]
gene32130	1.57917e-05	2.51359	glycogen phosphorylase, putative [Ricinus communis]
Walnut_newGene_5605	1.89343e-06	3.68197	PREDICTED: secoisolariciresinol dehydrogenase-like isoform X1 [Sesamum indicum]
gene20345	1.96449e-23	-2.97182	PREDICTED: TMV resistance protein N-like [Pyrus x bretschneideri]
gene9462	1.15388e-06	-2.0932	PREDICTED: ABC transporter G family member 17-like [Prunus mume]
gene13751	1.0468e-62	2.01471	LEC14B protein [Morus notabilis]
gene31442	1.24453e-05	-2.31275	PREDICTED: high mobility group B protein 6 [Vitis vinifera]
gene38250	3.25942e-129	-4.32309	heat shock protein 17.7 [Populus trichocarpa]
gene30304	5.00963e-119	-6.00671	hypothetical protein CISIN_1g045458mg [Citrus sinensis]
Walnut_newGene_4307	2.90893e-10	-6.24744	Indole-3-acetic acid-induced protein ARG2, putative [Theobroma cacao]
gene12341	1.20169e-120	-3.30883	hypothetical protein CISIN_1g028704mg [Citrus sinensis]
gene30612	2.03767e-06	-2.07947	hypothetical protein PRUPE_ppa018115mg [Prunus persica]
Walnut_newGene_1271	7.75365e-147	10.4989	conserved hypothetical protein [Ricinus communis]
gene17249	3.12018e-15	2.20238	RING/FYVE/PHD zinc finger superfamily protein [Theobroma cacao]
gene33091	1.35589e-31	4.55527	hypothetical protein JCGZ_18926 [Jatropha curcas]
gene21886	8.77817e-07	4.27416	PREDICTED: uncharacterized protein LOC105111213 [Populus euphratica]
gene40663	2.31752e-21	2.535	hypothetical protein JCGZ_20559 [Jatropha curcas]
gene12231	1.22089e-161	-4.24245	alpha-expansin [Ziziphus jujuba]
gene39797	4.06818e-256	-4.05218	Auxin-responsive GH3 family protein [Theobroma cacao]
gene6740	8.83461e-07	-2.53829	hypothetical protein PRUPE_ppa016153mg [Prunus persica]
gene13988	6.0709e-06	-3.0363	3-ketoacyl-CoA synthase 11 -like protein [Gossypium arboreum]
gene42768	0	-6.74957	PREDICTED: uncharacterized protein At1g04910-like [Malus domestica]
gene9814	2.23236e-21	-4.56166	hypothetical protein PRUPE_ppa026502mg [Prunus persica]
gene28913	2.48641e-05	-2.40636	hypothetical protein POPTR_0003s16580g [Populus trichocarpa]
gene26606	5.97877e-110	-2.76525	PREDICTED: protein EXORDIUM-like [Populus euphratica]
gene36473	6.424e-10	-5.31911	Myb domain protein 13, putative [Theobroma cacao]
gene26378	5.14821e-15	#NAME?	hypothetical protein PRUPE_ppa011207mg [Prunus persica]
gene6210	0.000109086	-2.35951	hypothetical protein ZEAMMB73_313798 [Zea mays]
gene13381	7.75273e-50	-2.82973	Paa2 P-type ATPase [Arabidopsis thaliana]
gene2788	4.78951e-14	-4.50861	PREDICTED: TMV resistance protein N-like [Prunus mume]
Walnut_newGene_4384	1.28023e-28	-3.04664	PREDICTED: uncharacterized protein LOC104604536 [Nelumbo nucifera]
gene37616	5.47075e-25	-8.35906	hypothetical protein PRUPE_ppa013862mg [Prunus persica]
gene34817	1.8813e-53	6.87981	UDP-glucosyl transferase 85A2 [Theobroma cacao]
gene22176	2.21818e-12	-3.40023	Brassinosteroid insensitive 1-associated receptor kinase 1 precursor [Theobroma cacao]
gene12814	1.47197e-12	-4.85111	PREDICTED: uncharacterized protein LOC105141060 [Populus euphratica]
gene28109	3.42989e-19	-2.96918	PREDICTED: transcription factor bHLH112 isoform X1 [Vitis vinifera]
gene27709	9.07788e-85	-2.07264	PREDICTED: uncharacterized protein LOC103343379 [Prunus mume]
Walnut_newGene_5637	2.97626e-05	2.58416	PREDICTED: filament-like plant protein 7 [Prunus mume]
gene5967	9.34934e-35	-4.22648	PREDICTED: probable carboxylesterase 5-like [Citrus sinensis]
gene29279	5.49669e-17	-3.23074	PREDICTED: probable carbohydrate esterase At4g34215-like isoform X1 [Glycine max]
gene39753	1.07874e-09	2.18175	hypothetical protein PRUPE_ppa007336mg [Prunus persica]
gene24234	2.20266e-29	-5.24932	geranyl diphosphate synthase large subunit [Humulus lupulus]
gene42147	3.38252e-54	#NAME?	PREDICTED: uncharacterized protein LOC104088010 [Nicotiana tomentosiformis]
gene32100	3.74133e-05	2.2677	PREDICTED: uncharacterized protein LOC103344504 [Prunus mume]
gene30074	4.54493e-13	-6.85672	hypothetical protein PRUPE_ppa025319mg [Prunus persica]
gene6629	0	-4.90175	PREDICTED: transcription factor bHLH35-like [Pyrus x bretschneideri]
gene38712	2.99848e-81	-8.01422	uncharacterized protein LOC100804022 [Glycine max]
gene22641	1.00883e-44	-5.45538	PREDICTED: uncharacterized protein LOC103967114 [Pyrus x bretschneideri]
gene21127	2.33336e-137	-2.88258	Inorganic H pyrophosphatase family protein isoform 1 [Theobroma cacao]
gene32444	2.00064e-55	-2.90002	Myb domain protein 30, putative [Theobroma cacao]
gene20767	3.98029e-87	Inf	PREDICTED: lysM domain-containing GPI-anchored protein 2 [Vitis vinifera]
gene7340	3.92083e-42	-3.06426	PREDICTED: FAS-associated factor 2-like [Prunus mume]
gene26280	3.15164e-168	-3.13823	PREDICTED: reticuline oxidase-like protein [Prunus mume]
gene25288	2.26419e-15	-2.49018	hypothetical protein CISIN_1g011935mg [Citrus sinensis]
gene12846	3.55944e-76	-3.8433	hypothetical protein JCGZ_15837 [Jatropha curcas]
gene4527	9.89879e-291	-4.52808	FASCICLIN-like arabinogalactan 2 [Theobroma cacao]
gene28739	1.10061e-06	2.07294	Heme oxygenase-like, multi-helical [Theobroma cacao]
gene2792	9.21497e-75	-2.01938	glycerophosphoryl diester phosphodiesterase, putative [Ricinus communis]
gene20276	5.67314e-204	#NAME?	Folic acid and derivative biosynthetic process [Theobroma cacao]
gene42699	9.05903e-54	-3.55801	hypothetical protein L484_011056 [Morus notabilis]
Walnut_newGene_4542	3.16074e-115	9.79388	PREDICTED: probable chlorophyll(ide) b reductase NYC1, chloroplastic [Prunus mume]
gene1235	4.33636e-05	2.04617	PREDICTED: uncharacterized protein LOC100247499 [Vitis vinifera]
gene40736	5.41102e-21	-3.56954	xyloglucan endotransglucosylase [Betula pendula]
gene39245	1.30425e-59	-3.46646	Pantothenate kinase [Gossypium arboreum]
gene27043	7.2457e-228	-8.33372	Lactoylglutathione lyase / glyoxalase I family protein [Theobroma cacao]
Walnut_newGene_7361	0.000224027	-2.08934	PREDICTED: 5-formyltetrahydrofolate cyclo-ligase-like [Fragaria vesca subsp. vesca]
gene32605	3.88022e-94	-2.30197	PREDICTED: glutamine synthetase nodule isozyme [Elaeis guineensis]
gene33302	9.52488e-09	-2.09696	PREDICTED: L-type lectin-domain containing receptor kinase IV.1 [Vitis vinifera]
gene5422	7.8792e-18	#NAME?	PREDICTED: probable LRR receptor-like serine/threonine-protein kinase At1g56130 [Prunus mume]
gene23906	1.08727e-30	-2.28176	RING/U-box superfamily protein, putative [Theobroma cacao]
gene20847	9.68743e-31	#NAME?	hypothetical protein PRUPE_ppa012483mg [Prunus persica]
gene33547	1.18392e-06	3.78952	PREDICTED: E3 ubiquitin protein ligase DRIP2 [Nelumbo nucifera]
gene33165	1.76035e-05	3.15258	PREDICTED: putative serine/threonine-protein kinase [Prunus mume]
gene41395	7.82818e-117	-3.43799	Kinase, putative [Theobroma cacao]
Walnut_newGene_2348	5.85991e-05	2.81215	hypothetical protein POPTR_0011s10720g [Populus trichocarpa]
gene33001	4.51952e-77	-2.76584	PREDICTED: protein CYPRO4-like [Citrus sinensis]
gene39824	0.000219592	3.46715	PREDICTED: LOB domain-containing protein 38-like [Malus domestica]
Walnut_newGene_1388	1.07246e-81	-2.26821	--
gene39976	8.73131e-22	-3.24217	NAC domain-containing protein [Boehmeria nivea]
gene36706	2.42116e-202	-3.58439	PREDICTED: probable protein phosphatase 2C 23 [Vitis vinifera]
gene24129	0	#NAME?	PREDICTED: uncharacterized membrane protein At4g09580-like [Pyrus x bretschneideri]
gene9586	2.1373e-19	#NAME?	agamous-like MADS-box protein AGL11 homologue [Betula pendula]
gene30589	7.5488e-07	3.22827	PREDICTED: axial regulator YABBY 5-like [Glycine max]
gene26200	9.84774e-21	Inf	GDSL esterase/lipase [Morus notabilis]
gene35232	1.11061e-167	-3.1175	Cyclin-T1-4 [Gossypium arboreum]
gene34734	1.86109e-270	-4.21178	PREDICTED: putative calcium-binding protein CML19 [Eucalyptus grandis]
gene34486	1.14574e-07	2.62891	PREDICTED: wall-associated receptor kinase 2-like [Malus domestica]
gene22857	3.97329e-29	3.35291	allergenic isoflavone reductase-like protein Bet v 6.0102 [Betula pendula]
gene36011	2.78367e-09	-7.08943	hypothetical protein CICLE_v10010775mg [Citrus clementina]
gene15834	5.21282e-20	-2.81033	trehalose-6-phosphate synthase, putative [Ricinus communis]
gene30329	6.08252e-236	-5.6973	hypothetical protein PRUPE_ppa007377mg [Prunus persica]
gene14757	2.94707e-33	2.489	Polyol transporter 5 [Morus notabilis]
gene1509	2.23635e-08	4.03547	PREDICTED: protein CUP-SHAPED COTYLEDON 2-like [Cucumis melo]
gene25310	2.43903e-80	-9.55961	PREDICTED: uncharacterized protein LOC104592525 [Nelumbo nucifera]
Walnut_newGene_5050	1.18585e-41	2.18276	MATE efflux family protein, expressed isoform 2 [Theobroma cacao]
gene31949	1.20747e-22	-3.52483	Nicotianamine synthase 3 [Theobroma cacao]
Walnut_newGene_4293	9.85296e-47	-3.76531	hypothetical protein glysoja_025159 [Glycine soja]
gene40129	1.75951e-80	-2.12658	PREDICTED: scarecrow-like protein 13-like [Citrus sinensis]
Walnut_newGene_431	2.96559e-29	-7.91872	PREDICTED: EH domain-containing protein 1-like [Fragaria vesca subsp. vesca]
gene2015	1.62972e-25	-2.38259	PREDICTED: probable LRR receptor-like serine/threonine-protein kinase At4g08850 [Prunus mume]
gene1410	1.55234e-31	-4.78927	alpha amylase/subtilisin inhibitor, partial [Fagus sylvatica]
gene39782	5.82913e-39	-3.87989	conserved hypothetical protein [Ricinus communis]
Walnut_newGene_1742	1.00671e-48	#NAME?	PREDICTED: putative ribonuclease H protein At1g65750 [Prunus mume]
gene14282	1.07638e-87	#NAME?	PREDICTED: cysteine-rich receptor-like protein kinase 10 [Vitis vinifera]
gene20714	3.38363e-97	#NAME?	Secretory carrier 3 isoform 2 [Theobroma cacao]
gene29553	1.91e-06	-2.44435	PREDICTED: bidirectional sugar transporter SWEET3 [Populus euphratica]
gene4994	6.09493e-107	-4.27804	chalcone synthase [Litchi chinensis]
gene13488	6.25877e-06	2.21619	PREDICTED: wall-associated receptor kinase 2-like [Vitis vinifera]
gene28511	1.07989e-15	-2.34238	DREB group protein [Ammopiptanthus mongolicus]
gene5626	6.38332e-206	-3.93855	Lipoxygenase 3 [Theobroma cacao]
gene42852	4.94995e-19	3.80303	unknown [Populus trichocarpa]
gene41667	1.17239e-59	-2.44022	PREDICTED: 18.5 kDa class I heat shock protein-like [Cicer arietinum]
gene4627	1.70222e-09	2.44564	PREDICTED: cation/calcium exchanger 1 [Eucalyptus grandis]
gene22839	4.16053e-198	-3.46701	Late embryogenesis abundant (LEA) hydroxyproline-rich glycoprotein family, putative [Theobroma cacao]
gene4631	2.8988e-13	#NAME?	uncharacterized LOC103453287 [Malus domestica]
gene30945	1.52293e-46	-4.76991	hypothetical protein CICLE_v10019936mg [Citrus clementina]
gene21150	0.000640413	2.25798	PREDICTED: serine/threonine-protein kinase At5g01020 [Vitis vinifera]
gene26037	2.95148e-05	2.45827	PREDICTED: uncharacterized protein LOC100784044 isoform X1 [Glycine max]
gene10003	5.25973e-11	-4.77838	hypothetical protein PRUPE_ppa001525mg [Prunus persica]
Walnut_newGene_5922	8.45325e-32	-2.75822	hypothetical protein CICLE_v10006402mg [Citrus clementina]
gene11682	1.2024e-31	-7.09447	hypothetical protein PRUPE_ppa026144mg [Prunus persica]
gene28847	5.87279e-30	-3.46656	WRKY family transcription factor [Theobroma cacao]
gene7295	3.87691e-13	#NAME?	PREDICTED: probable E3 ubiquitin-protein ligase RHA2B [Vitis vinifera]
gene21214	0.000189293	2.65031	hypothetical protein JCGZ_21368 [Jatropha curcas]
gene36443	7.04783e-29	-2.64864	PREDICTED: auxin-responsive protein IAA1 [Nelumbo nucifera]
gene22182	3.83454e-14	#NAME?	hypothetical protein POPTR_0013s02080g [Populus trichocarpa]
gene41522	8.4525e-09	3.46226	hypothetical protein PRUPE_ppa013224mg [Prunus persica]
gene28556	1.05957e-52	-4.01389	Myb domain protein 20 [Theobroma cacao]
gene26526	0	#NAME?	LEA protein [Juglans regia]
gene5211	1.33459e-153	-5.15518	PREDICTED: uncharacterized protein At1g04910-like [Prunus mume]
gene24210	2.73864e-94	-7.11134	PREDICTED: glutamate receptor 2.7-like [Populus euphratica]
gene1924	7.21314e-06	2.42133	hypothetical protein JCGZ_02935 [Jatropha curcas]
gene3197	2.97389e-76	-6.95484	Nitrate transporter 1.5 [Theobroma cacao]
gene747	4.41957e-32	-7.11569	PREDICTED: probable calcium-binding protein CML45 [Pyrus x bretschneideri]
gene19489	1.95912e-100	-6.6282	glycine-rich family protein [Populus trichocarpa]
gene41613	1.02036e-09	-2.31287	hypothetical protein POPTR_0011s07470g [Populus trichocarpa]
gene1431	9.07394e-25	2.86619	Leucine-rich repeat transmembrane protein kinase [Theobroma cacao]
gene42601	1.60646e-139	-2.85932	Vesicle-associated protein 4-2 [Theobroma cacao]
gene5748	1.2593e-25	-6.77041	hypothetical protein JCGZ_07925 [Jatropha curcas]
gene18350	1.55893e-09	2.38981	hypothetical protein CICLE_v10015979mg [Citrus clementina]
gene7997	6.52185e-11	Inf	PREDICTED: cytochrome P450 93A3-like isoform X2 [Populus euphratica]
gene29100	3.73936e-162	-7.47709	PREDICTED: beta-amylase 1, chloroplastic [Eucalyptus grandis]
gene27650	2.46225e-15	-5.9895	Abscisic acid 8&apos;-hydroxylase 4 isoform 1 [Theobroma cacao]
gene36133	6.25763e-14	-3.53697	PREDICTED: uncharacterized protein LOC103320764 [Prunus mume]
gene12052	4.0485e-07	2.21111	PREDICTED: uncharacterized protein LOC100262755 [Vitis vinifera]
gene2963	3.12939e-07	-2.79064	unnamed protein product [Vitis vinifera]
gene16624	7.56747e-201	-3.56619	serine/threonine-protein kinase cx32, putative [Ricinus communis]
gene1231	1.8478e-32	-2.01389	cytidine deaminase 1 family protein [Populus trichocarpa]
gene42870	4.17324e-21	-5.95895	PREDICTED: neurofilament medium polypeptide [Prunus mume]
gene15064	2.54854e-56	7.99229	PREDICTED: uncharacterized protein LOC100244219 [Vitis vinifera]
gene5375	0.000277296	7.11056	Putative peptide/nitrate transporter [Morus notabilis]
gene27589	4.03962e-14	-2.31068	Uncharacterized protein TCM_029239 [Theobroma cacao]
gene36517	3.19075e-10	-3.17443	PREDICTED: putative auxin efflux carrier component 5 [Prunus mume]
gene15638	1.12573e-05	-2.22869	PREDICTED: uncharacterized protein LOC100256691 [Vitis vinifera]
gene32184	8.69556e-62	-2.04382	hypothetical protein POPTR_0017s13240g [Populus trichocarpa]
gene6190	1.59319e-33	-2.59299	PREDICTED: protein IQ-DOMAIN 31-like [Vitis vinifera]
gene38808	7.24103e-61	-3.64183	PREDICTED: probable calcium-binding protein CML41 [Malus domestica]
Walnut_newGene_5182	1.3182e-169	Inf	PREDICTED: uncharacterized protein LOC103699285 [Phoenix dactylifera]
gene41254	2.02346e-05	5.04772	PREDICTED: LOB domain-containing protein 4 [Vitis vinifera]
gene15089	5.49611e-117	-5.87362	PREDICTED: probable pectate lyase 18-like [Fragaria vesca subsp. vesca]
gene34972	2.63532e-137	-4.68504	PREDICTED: ethylene-responsive transcription factor ERF027 [Vitis vinifera]
gene29987	9.99805e-41	8.08464	RecName: Full=Myrcene synthase, chloroplastic; Flags: Precursor [Quercus ilex]
gene29980	3.35753e-14	2.9077	hypothetical protein JCGZ_12616 [Jatropha curcas]
Walnut_newGene_3682	2.87311e-17	-2.51727	hypothetical protein CISIN_1g013919mg [Citrus sinensis]
gene7758	8.24084e-86	-2.08584	PREDICTED: putative phospholipid-transporting ATPase 9 [Prunus mume]
gene11410	5.62408e-09	#NAME?	PREDICTED: uncharacterized protein LOC105125744 [Populus euphratica]
gene30789	9.854e-69	-4.28568	PREDICTED: uncharacterized protein LOC103321395 [Prunus mume]
gene21739	1.34302e-27	-3.48614	PREDICTED: GDSL esterase/lipase 1 [Vitis vinifera]
gene30938	1.08125e-19	-2.07962	NC domain-containing family protein [Populus trichocarpa]
gene35730	5.75872e-21	-2.6002	hypothetical protein CICLE_v10031321mg [Citrus clementina]
gene11806	3.87623e-13	#NAME?	Nuclease PA3 [Morus notabilis]
gene42218	1.3829e-84	#NAME?	Amino acid permease 3 -like protein [Gossypium arboreum]
gene6032	2.1437e-74	-2.08431	PREDICTED: uncharacterized protein LOC100253523 isoform X1 [Vitis vinifera]
gene20217	5.14188e-42	4.81039	hypothetical protein JCGZ_11135 [Jatropha curcas]
gene35300	1.26641e-193	-3.45259	hypothetical protein JCGZ_14009 [Jatropha curcas]
gene827	6.94861e-40	-2.20914	hypothetical protein PHAVU_002G055700g [Phaseolus vulgaris]
gene27844	1.76676e-78	-3.47898	Uncharacterized protein TCM_038276 [Theobroma cacao]
gene3433	7.10737e-208	-3.92482	PREDICTED: uncharacterized protein LOC101505490 [Cicer arietinum]
gene40823	4.5951e-143	-2.85691	PREDICTED: uncharacterized protein LOC103497458 [Cucumis melo]
gene41755	8.76538e-33	-4.83949	unnamed protein product [Vitis vinifera]
gene3968	1.64308e-32	-2.61306	PREDICTED: probable receptor-like protein kinase At1g67000 isoform X1 [Vitis vinifera]
gene30309	5.27574e-26	-2.53661	hypothetical protein PRUPE_ppa002071mg [Prunus persica]
gene33991	0.000121457	2.30375	hypothetical protein CISIN_1g006747mg [Citrus sinensis]
gene12796	0	-9.60043	hypothetical protein VITISV_026044 [Vitis vinifera]
Walnut_newGene_1382	1.62202e-13	#NAME?	--
gene16049	2.617e-54	5.2793	Heavy metal transport/detoxification superfamily protein, putative [Theobroma cacao]
gene5774	1.51444e-290	-4.96289	PREDICTED: cellulose synthase-like protein D3 [Prunus mume]
gene4751	0.000115283	-3.60775	PREDICTED: protein GLUTAMINE DUMPER 3 [Malus domestica]
Walnut_newGene_7116	3.76541e-43	#NAME?	hypothetical protein CISIN_1g030612mg [Citrus sinensis]
gene6873	1.22992e-116	-3.10155	DNAJ heat shock family protein [Theobroma cacao]
gene23034	0	-10.7467	E3 ubiquitin-protein ligase UPL2 isoform 1 [Theobroma cacao]
gene32517	3.93876e-53	-3.82544	hypothetical protein JCGZ_00551 [Jatropha curcas]
gene35639	4.09919e-209	-3.57036	phosphate translocator-related family protein [Populus trichocarpa]
gene17137	5.72149e-244	-4.10213	18.2 kDa class I heat shock protein [Medicago truncatula]
gene27335	1.15044e-07	-3.95405	F-box and associated interaction domains-containing protein, putative [Theobroma cacao]
gene6363	3.81952e-17	-3.79305	hypothetical protein L484_008499 [Morus notabilis]
Walnut_newGene_6248	3.47774e-125	-2.78884	hypothetical protein VITISV_012106 [Vitis vinifera]
gene8671	1.82062e-15	3.78852	Zinc finger family protein / RNA recognition motif-containing protein, putative [Theobroma cacao]
gene36266	5.89513e-09	-5.16834	PREDICTED: WAT1-related protein At1g43650-like isoform X1 [Vitis vinifera]
gene30942	1.31949e-14	-2.03131	PREDICTED: calcium-transporting ATPase, endoplasmic reticulum-type [Populus euphratica]
gene21370	6.31302e-38	6.83514	hypothetical protein JCGZ_15984 [Jatropha curcas]
gene31030	1.95228e-18	#NAME?	PREDICTED: probable pectate lyase 18 isoform 1 [Glycine max]
gene5077	2.6247e-25	-5.36974	hypothetical protein POPTR_0015s12720g [Populus trichocarpa]
gene34047	2.87397e-07	3.39342	PREDICTED: auxin response factor 4 [Vitis vinifera]
gene32113	1.95982e-65	-2.12178	PREDICTED: uncharacterized protein At3g49720-like [Vitis vinifera]
gene38697	8.15759e-35	-2.19502	PREDICTED: CASP-like protein 4B1 [Populus euphratica]
gene5596	7.98891e-10	#NAME?	PREDICTED: putative disease resistance protein RGA4 [Prunus mume]
gene14428	1.22452e-57	-4.58443	PREDICTED: brassinosteroid-regulated protein BRU1-like [Pyrus x bretschneideri]
gene3154	4.38162e-14	2.02344	hypothetical protein POPTR_0001s06580g [Populus trichocarpa]
gene13339	1.95072e-15	-2.67007	Eukaryotic aspartyl protease family protein, putative [Theobroma cacao]
gene29969	8.70018e-68	#NAME?	hypothetical protein PRUPE_ppa017791mg [Prunus persica]
gene6792	4.50369e-51	-3.46704	PREDICTED: ocs element-binding factor 1-like [Populus euphratica]
gene4632	4.28081e-11	#NAME?	conserved hypothetical protein [Ricinus communis]
gene25334	5.59009e-33	#NAME?	PREDICTED: putative alpha-xylosidase 2 [Prunus mume]
gene11016	1.83173e-121	-3.47562	beta-galactosidase protein 2 [Prunus persica]
gene10049	3.72404e-75	-4.99464	PREDICTED: uncharacterized protein LOC101204590 [Cucumis sativus]
Walnut_newGene_5894	3.09826e-05	2.42392	hypothetical protein CICLE_v10009578mg [Citrus clementina]
gene37076	3.28379e-185	-4.11892	PREDICTED: uncharacterized protein LOC103412580 [Malus domestica]
gene36733	0.000692391	3.47924	aldo-keto reductase, putative [Ricinus communis]
gene18167	1.2885e-34	Inf	transferase, transferring glycosyl groups, putative [Ricinus communis]
gene34154	2.85383e-43	-2.18647	PREDICTED: calcium-dependent protein kinase 10 [Prunus mume]
gene2606	8.80133e-07	-2.04484	PREDICTED: cyclic nucleotide-gated ion channel 1-like [Malus domestica]
gene10538	4.98428e-08	-2.95684	PREDICTED: replication protein A 14 kDa subunit A [Nelumbo nucifera]
gene10152	3.67282e-09	-2.1887	Catalytic, putative [Theobroma cacao]
gene42001	1.25833e-71	-6.12681	PREDICTED: xyloglucan endotransglucosylase/hydrolase protein 22 [Glycine max]
gene37351	1.99968e-18	#NAME?	hypothetical protein PRUPE_ppa007928mg [Prunus persica]
gene26721	5.27054e-95	-6.94435	hypothetical protein PHAVU_001G1941000g, partial [Phaseolus vulgaris]
gene2345	1.16414e-34	-5.00596	PREDICTED: calmodulin-like protein 3 [Populus euphratica]
gene23621	5.56085e-23	-3.79448	Aspartic proteinase nepenthesin-1 precursor, putative [Ricinus communis]
gene25907	2.16313e-150	-2.96756	Soluble inorganic pyrophosphatase [Gossypium arboreum]
gene14037	1.23518e-30	-4.69899	hypothetical protein PRUPE_ppa007999mg [Prunus persica]
gene10494	1.18165e-15	-2.91147	PREDICTED: 3&apos;-5&apos; exoribonuclease 1-like isoform X2 [Eucalyptus grandis]
gene5053	1.00914e-26	-5.66884	hypothetical protein glysoja_029735 [Glycine soja]
gene3936	4.43605e-10	-2.22296	LOB domain-containing protein 41, putative [Theobroma cacao]
gene5991	5.18067e-281	#NAME?	PREDICTED: TMV resistance protein N-like isoform X1 [Malus domestica]
gene27385	1.69857e-06	-2.36431	PREDICTED: L-type lectin-domain containing receptor kinase S.4 [Prunus mume]
gene29769	1.97916e-118	-4.345	PREDICTED: HVA22-like protein i-like isoform X1 [Citrus sinensis]
gene42170	4.20647e-21	3.92134	PREDICTED: uncharacterized protein LOC104594556 [Nelumbo nucifera]
gene7703	8.16225e-25	-2.05584	RecName: Full=Beta-amyrin synthase [Betula platyphylla]
gene31386	8.47825e-23	-2.2938	Nucleobase-ascorbate transporter 6 [Morus notabilis]
gene32290	2.07235e-76	-2.54662	hypothetical protein PRUPE_ppa005711mg [Prunus persica]
gene20446	1.77e-19	-2.58963	PREDICTED: TMV resistance protein N-like [Prunus mume]
gene14574	1.56852e-26	#NAME?	PREDICTED: F-box protein At2g27310-like [Fragaria vesca subsp. vesca]
gene11728	4.20781e-250	-4.19881	PREDICTED: glutamyl-tRNA reductase 1, chloroplastic-like [Pyrus x bretschneideri]
gene25666	2.57416e-85	-2.72178	PREDICTED: probable polyol transporter 4 [Prunus mume]
gene29656	4.93969e-20	2.19527	PREDICTED: adipocyte plasma membrane-associated protein-like [Fragaria vesca subsp. vesca]
gene14281	2.4055e-86	-7.42696	PREDICTED: cysteine-rich receptor-like protein kinase 10 [Malus domestica]
gene7119	3.51981e-11	2.37532	hypothetical protein POPTR_0006s00620g [Populus trichocarpa]
gene33549	1.09831e-50	-6.91301	PREDICTED: developmental protein SEPALLATA 2-like [Cucumis sativus]
gene3431	4.75132e-05	3.81441	unnamed protein product [Vitis vinifera]
gene12178	3.28393e-240	3.86382	Multidrug resistance protein ABC transporter family [Theobroma cacao]
gene25347	4.47272e-201	-3.61554	GUANYLATE KINASE 1 family protein [Populus trichocarpa]
gene26148	3.81042e-08	-3.85218	PREDICTED: uncharacterized protein LOC100252003 [Vitis vinifera]
Walnut_newGene_4760	1.28154e-06	Inf	PREDICTED: uncharacterized protein LOC105051172 isoform X1 [Elaeis guineensis]
gene25623	2.79715e-14	2.02503	PREDICTED: nucleolar MIF4G domain-containing protein 1 [Prunus mume]
gene35993	1.91891e-05	-2.2438	hypothetical protein CICLE_v10009202mg [Citrus clementina]
gene26003	9.15554e-10	Inf	hypothetical protein PRUPE_ppa000873mg [Prunus persica]
Walnut_newGene_1030	1.53512e-13	Inf	Alpha-ketoglutarate-dependent dioxygenase AlkB [Gossypium arboreum]
gene36083	2.45054e-185	-3.2666	PREDICTED: uncharacterized protein LOC100798019 isoform X1 [Glycine max]
gene5119	1.96462e-30	-2.05549	PREDICTED: probable LRR receptor-like serine/threonine-protein kinase At4g08850-like [Fragaria vesca subsp. vesca]
gene28700	2.59663e-06	-2.36571	hypothetical protein CICLE_v10021291mg [Citrus clementina]
gene34675	2.56001e-15	-4.67083	PREDICTED: thioredoxin-like protein 4B [Vitis vinifera]
gene36541	1.65511e-15	#NAME?	PREDICTED: uncharacterized protein LOC100853631 [Vitis vinifera]
gene150	1.77278e-07	-4.43894	hypothetical protein L484_017676 [Morus notabilis]
gene33685	1.46267e-31	-2.64844	hypothetical protein JCGZ_05584 [Jatropha curcas]
gene7141	5.61522e-34	-7.41064	PREDICTED: 8-hydroxygeraniol dehydrogenase-like [Malus domestica]
gene26142	1.71848e-41	-2.04636	PREDICTED: probable methyltransferase PMT15 [Pyrus x bretschneideri]
gene31706	0	#NAME?	PREDICTED: probable aldo-keto reductase 1 [Prunus mume]
Walnut_newGene_660	4.05952e-28	3.86221	PREDICTED: uncharacterized protein LOC103724356 [Phoenix dactylifera]
gene19813	9.60049e-09	#NAME?	PREDICTED: U-box domain-containing protein 27 [Vitis vinifera]
gene38908	4.66487e-18	-2.55821	PREDICTED: uncharacterized protein LOC100854636 [Vitis vinifera]
gene23229	2.94383e-62	-8.16327	hypothetical protein PRUPE_ppa012647mg [Prunus persica]
gene16957	3.18661e-14	2.29548	PREDICTED: uncharacterized protein LOC100258615 isoform X1 [Vitis vinifera]
gene34801	3.85095e-82	-8.031	PREDICTED: MATE efflux family protein LAL5-like [Populus euphratica]
gene3468	3.42874e-52	3.32591	hypothetical protein POPTR_0011s11810g [Populus trichocarpa]
gene1518	2.18098e-06	-2.65901	PREDICTED: dynein light chain, cytoplasmic-like [Malus domestica]
gene7786	4.09341e-25	-3.55448	Clathrin light chain protein, putative [Theobroma cacao]
gene15483	6.48636e-75	Inf	glutathione S-transferase [Betula pendula]
gene4771	8.96645e-50	-2.96267	Chorismate mutase [Morus notabilis]
gene14772	3.19602e-25	2.11638	cyclin-dependent kinase [Juglans nigra x Juglans regia]
gene4287	3.92391e-21	-3.21311	PREDICTED: probable protein phosphatase 2C 49-like isoform X2 [Glycine max]
gene24899	9.95315e-44	-3.81687	Eukaryotic aspartyl protease family protein, putative isoform 1 [Theobroma cacao]
gene13509	4.89444e-10	-4.86312	hypothetical protein CICLE_v10019990mg [Citrus clementina]
gene25802	1.12948e-10	-2.45219	hypothetical protein PRUPE_ppa006563mg [Prunus persica]
gene29704	2.39131e-58	7.6117	Adenine nucleotide alpha hydrolases-like superfamily protein [Theobroma cacao]
gene21106	1.39171e-119	2.6291	Eukaryotic translation initiation factor 1A [Gossypium arboreum]
gene10221	1.52879e-88	-5.5892	PREDICTED: basic blue protein [Populus euphratica]
gene13031	1.53135e-11	-2.0856	beta-amylase [Castanea crenata]
Walnut_newGene_4827	2.75265e-08	#NAME?	hypothetical protein JCGZ_07720 [Jatropha curcas]
gene38784	1.45499e-84	-2.08658	PREDICTED: wall-associated receptor kinase-like 14 [Malus domestica]
gene34544	1.032e-13	-2.46067	hexose transporter 1 [Juglans regia]
gene26699	1.3665e-07	-2.1643	hypothetical protein PRUPE_ppa005259mg [Prunus persica]
gene26028	3.57686e-05	2.00613	hypothetical protein PRUPE_ppa006855mg [Prunus persica]
gene41676	2.68983e-37	-8.29764	PREDICTED: 18.5 kDa class I heat shock protein-like [Cicer arietinum]
gene41422	2.94237e-11	4.37428	Cold-regulated 413-plasma membrane 2 isoform 1 [Theobroma cacao]
gene1206	6.16949e-14	#NAME?	PREDICTED: cytokinin dehydrogenase 4-like [Prunus mume]
Walnut_newGene_357	1.21141e-13	#NAME?	PREDICTED: carboxypeptidase A6-like [Cicer arietinum]
gene14357	0	-7.78005	PREDICTED: 2-alkenal reductase (NADP(+)-dependent)-like [Pyrus x bretschneideri]
gene37781	1.01249e-48	-4.55458	PREDICTED: homeobox-leucine zipper protein ATHB-40-like [Glycine max]
gene24826	4.30537e-06	6.94842	PREDICTED: probable LRR receptor-like serine/threonine-protein kinase At4g36180 [Vitis vinifera]
gene9110	5.18616e-13	#NAME?	PREDICTED: non-specific lipid-transfer protein-like protein At2g13820 [Prunus mume]
gene3481	1.10236e-143	-2.83803	PREDICTED: stem-specific protein TSJT1-like [Cicer arietinum]
gene22512	9.86215e-16	-4.39107	PREDICTED: transcription factor MYB108-like [Populus euphratica]
gene10611	0.000557163	2.38819	PREDICTED: RNA polymerase sigma factor sigA-like isoform X1 [Citrus sinensis]
Walnut_newGene_546	3.22257e-17	-2.63858	hypothetical protein PRUPE_ppa007341mg [Prunus persica]
gene13200	3.5564e-292	-11.706	hypothetical protein L484_022467 [Morus notabilis]
gene24702	1.52988e-06	-2.40029	PREDICTED: receptor-like cytosolic serine/threonine-protein kinase RBK1 [Vitis vinifera]
gene21936	1.24214e-59	-8.08959	PREDICTED: E3 ubiquitin-protein ligase CHFR [Prunus mume]
gene20297	0.000198136	-2.06803	PREDICTED: auxin-responsive protein IAA29-like [Populus euphratica]
gene16743	3.20308e-91	-5.02909	PREDICTED: secretory carrier-associated membrane protein 4-like [Cucumis sativus]
gene2307	1.6404e-51	-3.46124	hypothetical protein PRUPE_ppa002946mg [Prunus persica]
gene14702	2.99617e-08	-2.03469	PREDICTED: protein DA1-related 2 isoform X1 [Prunus mume]
gene29130	5.11162e-83	-3.24154	aquaporin NIP6.1 family protein [Populus trichocarpa]
gene4792	1.90645e-28	6.53665	Kinase, putative [Theobroma cacao]
gene38812	4.4172e-41	-2.81045	PREDICTED: elongation of fatty acids protein 3-like [Nelumbo nucifera]
gene15718	1.05851e-55	3.46732	PREDICTED: protein NRT1/ PTR FAMILY 6.3 [Vitis vinifera]
gene16334	1.72368e-53	7.1787	PREDICTED: probable LRR receptor-like serine/threonine-protein kinase At1g56130 [Vitis vinifera]
gene19683	5.35893e-37	-2.05072	PREDICTED: protein translation factor SUI1 homolog 1-like [Cucumis sativus]
gene16627	2.77585e-07	-3.02997	hypothetical protein L484_007076 [Morus notabilis]
gene4915	2.93484e-26	#NAME?	PREDICTED: isoflavone 2&apos;-hydroxylase-like [Vitis vinifera]
gene37482	5.47451e-07	5.28558	PREDICTED: pectinesterase-like [Malus domestica]
gene28606	4.47192e-16	2.0082	Starch branching enzyme 2.1 isoform 4 [Theobroma cacao]
gene34494	2.32332e-89	-3.62395	PREDICTED: LOW QUALITY PROTEIN: probable isoaspartyl peptidase/L-asparaginase 2 [Malus domestica]
gene32201	1.07373e-57	-3.32682	PREDICTED: PI-PLC X domain-containing protein At5g67130 [Prunus mume]
gene37887	1.83249e-24	-3.12045	Leucine-rich repeat protein kinase family protein isoform 1 [Theobroma cacao]
gene26354	5.59631e-174	-7.88562	Allene oxide synthase [Morus notabilis]
gene29889	7.94951e-74	-2.03506	Transmembrane amino acid transporter family protein isoform 1 [Theobroma cacao]
gene22563	8.02176e-59	-7.52279	STS14 protein precursor, putative [Ricinus communis]
gene38328	1.44694e-21	-4.37437	unnamed protein product [Coffea canephora]
gene7695	2.50154e-90	-2.35807	PREDICTED: organic cation/carnitine transporter 7 [Vitis vinifera]
gene41286	6.74207e-60	-6.26626	Senescence-related gene 1 [Theobroma cacao]
gene28126	3.44708e-09	2.39527	Chloroplastic drought-induced stress protein of 32 kD [Theobroma cacao]
gene30981	3.5833e-94	-2.97166	hypothetical protein CICLE_v10032703mg [Citrus clementina]
gene25349	2.65961e-96	7.92402	Nudix hydrolase 18 [Morus notabilis]
gene32525	3.06987e-51	-3.41912	1,3-beta glucanase [Quercus suber]
gene40028	4.34292e-181	-3.86344	Xyloglucan endotransglucosylase/hydrolase 16 [Theobroma cacao]
gene30301	2.42753e-24	#NAME?	PREDICTED: G-type lectin S-receptor-like serine/threonine-protein kinase RLK1 isoform X1 [Vitis vinifera]
gene20866	1.08179e-98	#NAME?	PREDICTED: TMV resistance protein N-like [Prunus mume]
gene23405	3.34089e-204	-4.48618	PREDICTED: AP2/ERF and B3 domain-containing transcription factor RAV1-like [Vitis vinifera]
gene22659	7.69699e-132	-2.93916	hypothetical protein CICLE_v10022558mg [Citrus clementina]
Walnut_newGene_1575	1.32244e-24	-6.22201	Inorganic H pyrophosphatase family protein isoform 1 [Theobroma cacao]
gene14369	1.13916e-41	-5.16226	WRKY family transcription factor [Theobroma cacao]
gene38943	0.000899291	2.30054	R2R3 Myb30 transcription factor [Vitis vinifera]
Walnut_newGene_5996	1.62326e-15	3.72515	PREDICTED: protein XRI1 [Prunus mume]
gene8861	6.23017e-13	-3.64784	PREDICTED: protein BONZAI 3-like [Citrus sinensis]
gene37208	3.82844e-18	-3.30774	hypothetical protein POPTR_0007s13320g [Populus trichocarpa]
gene30527	5.64197e-11	-2.07415	P-loop containing nucleoside triphosphate hydrolases superfamily protein isoform 1 [Theobroma cacao]
gene12372	5.63646e-17	-2.28271	PREDICTED: putative lipase ROG1 [Prunus mume]
gene1405	5.37805e-12	#NAME?	PREDICTED: receptor-like serine/threonine-protein kinase At1g78530-like [Fragaria vesca subsp. vesca]
gene3603	4.87022e-07	-4.07831	O-Glycosyl hydrolases family 17 protein [Theobroma cacao]
gene39817	1.88497e-77	-5.07383	hypothetical protein POPTR_0009s09380g [Populus trichocarpa]
gene41154	5.38549e-12	#NAME?	PREDICTED: uncharacterized protein LOC103489631 [Cucumis melo]
gene39488	1.05689e-11	-5.5729	hypothetical protein PRUPE_ppa000726mg [Prunus persica]
gene9774	1.8133e-69	-2.23897	hypothetical protein PRUPE_ppa008347mg [Prunus persica]
gene31115	1.80914e-08	3.20311	hypothetical protein CICLE_v10028305mg [Citrus clementina]
Walnut_newGene_4798	2.21311e-05	3.12888	PREDICTED: probable Ufm1-specific protease-like [Cucumis sativus]
gene10384	5.43042e-11	2.64428	PREDICTED: MATE efflux family protein 1-like [Prunus mume]
gene8461	0	-8.19612	Autoinhibited calcium ATPase [Theobroma cacao]
Walnut_newGene_1281	6.53838e-58	-3.07008	--
gene8454	1.55493e-33	2.03224	hypothetical protein PRUPE_ppa008135mg [Prunus persica]
gene15910	6.87181e-10	-6.18853	hypothetical protein L484_008637 [Morus notabilis]
gene42104	7.8652e-08	-2.7355	NAC transcription factor 037 [Jatropha curcas]
gene17903	7.66775e-05	-2.39061	PREDICTED: F-box protein At2g27310-like [Fragaria vesca subsp. vesca]
gene20833	5.74356e-160	-9.66683	JHL06P13.14 [Jatropha curcas]
gene9256	4.58213e-05	2.85404	PREDICTED: probable leucine-rich repeat receptor-like serine/threonine-protein kinase At3g14840 [Nelumbo nucifera]
gene1454	8.52502e-28	#NAME?	hypothetical protein POPTR_0001s40140g [Populus trichocarpa]
gene9284	1.39754e-30	3.4412	hypothetical protein JCGZ_12877 [Jatropha curcas]
gene39286	1.05588e-67	-9.25688	1-aminocyclopropane-1-carboxylate oxidase 3 [Morus notabilis]
gene8482	1.73807e-24	2.85437	PREDICTED: uncharacterized protein LOC103323529 [Prunus mume]
gene20511	3.75655e-08	#NAME?	hypothetical protein CICLE_v10003660mg [Citrus clementina]
gene15398	1.43926e-15	-2.70653	PREDICTED: oxysterol-binding protein-related protein 1C-like isoform X1 [Populus euphratica]
gene33759	1.58616e-06	-2.28664	PREDICTED: protein TRANSPARENT TESTA 12-like [Eucalyptus grandis]
gene16360	0	-5.22002	Uncharacterized protein TCM_016960 [Theobroma cacao]
gene33199	3.30534e-05	-2.28716	hypothetical protein POPTR_0007s06720g [Populus trichocarpa]
gene33580	6.4865e-19	3.1961	PREDICTED: S-adenosylmethionine decarboxylase proenzyme-like [Nelumbo nucifera]
gene35168	2.86916e-49	-4.89067	hypothetical protein JCGZ_22195 [Jatropha curcas]
Walnut_newGene_271	2.12692e-10	-2.55973	PREDICTED: uncharacterized protein LOC104452694 [Eucalyptus grandis]
gene31300	7.57594e-55	-5.35549	Receptor like protein 1, putative [Theobroma cacao]
gene2564	1.15311e-05	3.51169	hypothetical protein POPTR_0018s12360g [Populus trichocarpa]
gene36575	8.0757e-70	-3.88753	PREDICTED: WAT1-related protein At3g28050-like [Pyrus x bretschneideri]
gene7528	7.81178e-36	-8.24299	PREDICTED: ankyrin repeat-containing protein At3g12360-like [Prunus mume]
gene39400	7.82006e-14	-4.52531	PREDICTED: WAT1-related protein At4g08300-like [Pyrus x bretschneideri]
gene7676	2.62581e-13	2.12273	Type I inositol polyphosphate 5-phosphatase, putative isoform 1 [Theobroma cacao]
gene14535	4.75153e-05	2.74724	PREDICTED: 50S ribosomal protein L31, chloroplastic [Populus euphratica]
gene7911	4.20666e-93	-2.98167	PREDICTED: beta-carotene hydroxylase 2, chloroplastic [Vitis vinifera]
gene39097	1.61853e-257	-4.55443	PREDICTED: probable galactinol--sucrose galactosyltransferase 6 isoform X1 [Populus euphratica]
gene39442	1.2072e-20	4.5052	PREDICTED: protein SCARECROW [Vitis vinifera]
gene34509	3.73125e-23	-2.17309	hypothetical protein PRUPE_ppa021081mg, partial [Prunus persica]
gene27383	1.19629e-15	-3.96762	PREDICTED: allantoate deiminase isoform X3 [Populus euphratica]
gene1043	3.7349e-31	-2.0756	unnamed protein product [Vitis vinifera]
gene34720	9.13246e-81	-2.44686	hypothetical protein PRUPE_ppa008392mg [Prunus persica]
gene27556	5.81635e-80	-7.99167	hypothetical protein JCGZ_24938 [Jatropha curcas]
gene23069	7.99591e-10	-2.14019	hypothetical protein PRUPE_ppa006742mg [Prunus persica]
gene23347	1.76311e-09	-3.39171	hypothetical protein PRUPE_ppa008027mg [Prunus persica]
Walnut_newGene_5682	4.54464e-63	Inf	PREDICTED: arginine/serine-rich coiled-coil protein 2 isoform X2 [Vitis vinifera]
gene15580	2.50688e-46	-5.8919	chitinase, putative [Ricinus communis]
gene36571	5.90108e-19	-2.4493	transferase, transferring glycosyl groups, putative [Ricinus communis]
gene11119	3.91526e-78	#NAME?	PREDICTED: protein ECERIFERUM 1-like [Sesamum indicum]
Walnut_newGene_1576	3.83356e-14	#NAME?	putative adenine nucleotide translocase [Castanea sativa]
gene37522	5.82698e-47	-2.49233	PREDICTED: uncharacterized protein LOC103325540 [Prunus mume]
gene15855	2.20164e-184	-3.28143	PREDICTED: L-ascorbate oxidase [Prunus mume]
gene9301	1.77357e-28	3.01881	Phototropic-responsive NPH3 family protein [Theobroma cacao]
gene32038	8.78208e-13	-3.89317	PREDICTED: cysteine-rich receptor-like protein kinase 2 [Vitis vinifera]
gene11720	2.70278e-245	-4.2245	Leucine-rich receptor-like protein kinase family protein, XI-23,RLK7, putative [Theobroma cacao]
gene19299	5.65718e-127	-3.86444	PREDICTED: GEM-like protein 4 [Populus euphratica]
gene2958	0.000117636	2.12191	PREDICTED: auxin-responsive protein IAA27 [Vitis vinifera]
Walnut_newGene_853	3.04571e-71	#NAME?	hypothetical protein VITISV_026680 [Vitis vinifera]
Walnut_newGene_167	9.12021e-13	#NAME?	--
gene30669	1.43285e-16	-2.77144	C2H2-type zinc finger protein 1 [Populus trichocarpa]
gene15885	7.38392e-91	-2.15923	PREDICTED: uncharacterized protein LOC103338478 [Prunus mume]
gene11599	5.53388e-06	2.30358	PREDICTED: uncharacterized protein LOC102617869 isoform X3 [Citrus sinensis]
gene10747	0	-6.64449	hypothetical protein PRUPE_ppa018357mg [Prunus persica]
gene39564	1.24852e-06	2.79741	PREDICTED: ammonium transporter 3 member 1-like [Vitis vinifera]
gene7893	3.53091e-08	2.90458	glycosyltransferase [Actinidia deliciosa]
gene15786	3.88947e-07	2.6303	hypothetical protein VITISV_019620 [Vitis vinifera]
gene7804	1.9016e-20	#NAME?	PREDICTED: uncharacterized protein LOC101514713 [Cicer arietinum]
gene28563	8.59888e-261	-5.02273	Seven transmembrane MLO family protein isoform 1 [Theobroma cacao]
gene38252	2.8861e-11	-3.93956	PREDICTED: probable boron transporter 2 [Prunus mume]
Walnut_newGene_2152	5.60597e-06	3.26114	hypothetical protein PRUPE_ppa002996mg [Prunus persica]
gene10840	2.34778e-74	-3.48602	hypothetical protein PRUPE_ppa017191mg [Prunus persica]
gene27041	4.89715e-19	#NAME?	PREDICTED: uncharacterized protein LOC104419998 [Eucalyptus grandis]
gene39930	6.17767e-05	3.08139	PREDICTED: uncharacterized protein LOC100253188 [Vitis vinifera]
gene29412	7.51788e-08	2.9829	Salt tolerance 2, putative isoform 1 [Theobroma cacao]
gene14303	6.13508e-42	-2.86069	PREDICTED: dehydration-responsive element-binding protein 1E [Vitis vinifera]
gene11913	7.01313e-09	#NAME?	hypothetical protein PRUPE_ppa023217mg [Prunus persica]
gene30440	2.35914e-42	-2.07127	chloride channel-like family protein [Populus trichocarpa]
gene30711	1.70991e-12	-4.32229	PREDICTED: uncharacterized protein LOC104881134 [Vitis vinifera]
gene19258	9.34931e-07	2.48151	uncharacterized protein LOC100305628 [Glycine max]
gene8439	1.64154e-70	2.92031	hypothetical protein JCGZ_02224 [Jatropha curcas]
Walnut_newGene_4416	3.43959e-31	#NAME?	unknown [Glycine max]
gene24818	3.36481e-41	-6.07791	PREDICTED: indole-3-acetic acid-induced protein ARG2-like [Eucalyptus grandis]
gene15417	1.3422e-198	-3.44354	Secernin-2 [Gossypium arboreum]
gene42040	6.62246e-51	-2.09552	Fatty acid hydroxylase superfamily [Theobroma cacao]
gene20524	2.19252e-25	#NAME?	Salicylate O-methyltransferase [Gossypium arboreum]
gene36930	0.000678029	-2.07507	hypothetical protein PRUPE_ppa010130mg [Prunus persica]
gene38384	2.33121e-45	-8.61459	Ankyrin repeat-containing protein isoform 1 [Theobroma cacao]
gene396	1.38523e-143	-10.4646	PREDICTED: bidirectional sugar transporter SWEET14 [Vitis vinifera]
gene33005	1.40517e-49	-3.13766	PREDICTED: uncharacterized protein LOC101296846 [Fragaria vesca subsp. vesca]
gene41367	2.34623e-36	-3.58855	hypothetical protein L484_007546 [Morus notabilis]
gene26100	6.00887e-18	3.56332	Nitrate transporter 1.1 [Morus notabilis]
Walnut_newGene_5139	5.37561e-12	#NAME?	hypothetical protein EUGRSUZ_D02266, partial [Eucalyptus grandis]
gene37972	1.85265e-56	-2.62797	hypothetical protein JCGZ_03451 [Jatropha curcas]
gene17829	1.4572e-13	-3.51165	hypothetical protein L484_007076 [Morus notabilis]
gene36208	1.3545e-05	-2.33996	PREDICTED: TMV resistance protein N-like, partial [Prunus mume]
gene11520	2.90041e-13	#NAME?	PREDICTED: PTI1-like tyrosine-protein kinase At3g15890-like [Fragaria vesca subsp. vesca]
gene23412	1.16236e-07	2.33973	unnamed protein product [Vitis vinifera]
gene4376	5.54768e-18	-4.06194	hypothetical protein Csa_3G485850 [Cucumis sativus]
gene22625	1.20327e-05	5.00192	Copper amine oxidase family protein isoform 1 [Theobroma cacao]
gene2132	7.14498e-49	-2.52064	Chalcone-flavanone isomerase family protein isoform 1 [Theobroma cacao]
gene23042	2.52893e-17	-5.65826	UDP-Glycosyltransferase superfamily protein [Theobroma cacao]
gene27033	1.522e-18	-3.62673	Polygalacturonase [Morus notabilis]
gene20794	7.7048e-46	5.46901	caffeic acid O-methyltransferase family protein [Populus trichocarpa]
gene12882	5.79036e-47	-3.51643	hypothetical protein PRUPE_ppb022962mg [Prunus persica]
gene35137	2.40642e-07	-3.53207	phosphofructokinase [Hevea brasiliensis]
gene13783	2.25572e-33	-2.79533	putative hydroxycinnamoyl CoA shikimate/quinate hydroxycinnamoyl transferase [Hibiscus cannabinus]
gene19862	1.98614e-34	4.11566	PREDICTED: cyclic nucleotide-gated ion channel 1-like [Cicer arietinum]
gene13023	3.70217e-14	Inf	hypothetical protein L484_018297 [Morus notabilis]
gene20189	1.25935e-41	-3.31744	PREDICTED: probable WRKY transcription factor 17 [Nelumbo nucifera]
gene38359	9.45578e-210	-3.79575	conserved hypothetical protein [Ricinus communis]
gene18492	1.36629e-12	-3.97365	PREDICTED: LRR receptor-like serine/threonine-protein kinase GSO2 isoform X3 [Vitis vinifera]
Walnut_newGene_3846	9.75776e-16	-4.90947	PREDICTED: UDP-glucuronic acid decarboxylase 1-like [Pyrus x bretschneideri]
gene10264	0	-7.43474	hypothetical protein JCGZ_16402 [Jatropha curcas]
gene41566	6.51549e-47	#NAME?	hypothetical protein POPTR_0001s31480g [Populus trichocarpa]
gene5987	7.24433e-76	-9.43839	PREDICTED: TMV resistance protein N-like [Pyrus x bretschneideri]
Walnut_newGene_5100	6.64265e-29	Inf	PREDICTED: uncharacterized protein LOC101305262 [Fragaria vesca subsp. vesca]
gene15219	8.65223e-85	-9.61456	WRKY family transcription factor [Theobroma cacao]
Walnut_newGene_4484	4.55151e-10	-2.92762	PREDICTED: L-type lectin-domain containing receptor kinase VIII.2-like [Eucalyptus grandis]
gene33338	2.0055e-86	-2.10707	Myc2 bHLH protein isoform 1 [Theobroma cacao]
gene16463	1.2183e-10	4.93654	PREDICTED: expansin-A11 [Prunus mume]
Walnut_newGene_7129	1.97185e-41	#NAME?	hypothetical protein VITISV_021899 [Vitis vinifera]
gene38035	1.4555e-87	2.10973	hypothetical protein L484_009784 [Morus notabilis]
gene32069	6.33099e-132	-3.46981	conserved hypothetical protein [Ricinus communis]
gene4157	4.06509e-19	2.54204	hypothetical protein JCGZ_02196 [Jatropha curcas]
gene11822	1.97331e-09	-4.20079	hypothetical protein CICLE_v10010157mg [Citrus clementina]
gene41236	5.15032e-06	-2.78393	PREDICTED: glutaredoxin-C13 [Vitis vinifera]
gene834	1.35125e-83	-4.20528	PREDICTED: RING-H2 finger protein ATL22-like [Populus euphratica]
gene15171	3.14119e-13	3.92555	hypothetical protein JCGZ_09313 [Jatropha curcas]
gene35433	1.54301e-59	-4.83973	PREDICTED: uncharacterized protein LOC100804436 [Glycine max]
gene15545	9.07662e-14	#NAME?	hypothetical protein PRUPE_ppa021703mg [Prunus persica]
gene11351	1.71099e-16	#NAME?	PREDICTED: cysteine-rich repeat secretory protein 38-like [Citrus sinensis]
Walnut_newGene_3277	3.21776e-15	-2.19939	Uncharacterized protein TCM_036737 [Theobroma cacao]
gene31196	2.76389e-06	-2.9339	PREDICTED: L-ascorbate oxidase-like [Citrus sinensis]
gene23572	1.28375e-54	#NAME?	Kinase, putative [Theobroma cacao]
gene42970	1.16682e-10	Inf	hypothetical protein PRUPE_ppa000192mg [Prunus persica]
gene5612	1.26033e-223	-3.96163	JAZ2 [Hevea brasiliensis]
gene2789	3.40428e-11	-2.89707	hypothetical protein JCGZ_11251 [Jatropha curcas]
gene27538	6.67655e-09	-2.75933	PREDICTED: L-type lectin-domain containing receptor kinase I.8 [Populus euphratica]
gene40607	2.98534e-118	-2.58015	ubiquitin conjugating-like enzyme family protein [Populus trichocarpa]
gene32805	9.12147e-15	Inf	PREDICTED: probable chlorophyll(ide) b reductase NYC1, chloroplastic [Prunus mume]
gene41627	1.16501e-12	-3.22741	PREDICTED: uncharacterized protein LOC104092367 [Nicotiana tomentosiformis]
gene20210	1.04248e-05	-2.12871	PREDICTED: 2-alkenal reductase (NADP(+)-dependent)-like [Citrus sinensis]
gene41519	1.62298e-38	-2.77681	hypothetical protein JCGZ_10140 [Jatropha curcas]
gene13135	5.11001e-29	3.91156	PREDICTED: peroxidase 12-like [Fragaria vesca subsp. vesca]
gene16401	2.13283e-07	3.82224	Auxin-responsive GH3 family protein [Theobroma cacao]
gene37395	1.6483e-48	#NAME?	PREDICTED: uncharacterized protein LOC103949307 [Pyrus x bretschneideri]
gene39530	6.16057e-13	3.89835	cytochrome P450, putative [Ricinus communis]
gene34465	3.57349e-204	-3.48674	PREDICTED: IAA-amino acid hydrolase ILR1-like [Prunus mume]
gene37094	9.07662e-14	#NAME?	PREDICTED: uncharacterized protein LOC105134527 [Populus euphratica]
gene30759	2.43573e-226	-3.74716	OSBP(oxysterol binding protein)-related protein 1C isoform 2 [Theobroma cacao]
gene41531	7.53791e-09	-2.91517	hypothetical protein CISIN_1g036938mg [Citrus sinensis]
gene7091	2.43263e-12	-3.845	hypothetical protein VITISV_007510 [Vitis vinifera]
gene33586	8.61352e-35	-4.92009	Heptahelical transmembrane protein2 [Theobroma cacao]
gene10322	4.06312e-34	-2.29463	hypothetical protein PRUPE_ppa025692mg [Prunus persica]
gene8016	3.65632e-14	-3.7623	hypothetical protein POPTR_0007s05910g [Populus trichocarpa]
gene39016	2.50676e-10	2.67358	PREDICTED: deSI-like protein At4g17486 [Vitis vinifera]
gene16153	5.07466e-126	Inf	conserved hypothetical protein [Ricinus communis]
gene1007	2.81707e-28	2.23701	PREDICTED: ethylene receptor 2 [Prunus mume]
gene23957	1.80118e-11	-2.88143	PREDICTED: formin-like protein 1-like [Citrus sinensis]
gene40030	5.17056e-75	2.01132	PREDICTED: dentin sialophosphoprotein [Pyrus x bretschneideri]
gene17780	3.96826e-120	-4.6314	Glutaredoxin, putative [Theobroma cacao]
gene39644	1.03019e-86	-2.22089	PREDICTED: probable polygalacturonase [Pyrus x bretschneideri]
gene39374	2.15228e-14	#NAME?	PREDICTED: LOW QUALITY PROTEIN: ELMO domain-containing protein A [Eucalyptus grandis]
gene41006	1.07915e-08	2.54039	PREDICTED: peroxisomal ATPase pex1-like [Citrus sinensis]
gene42193	9.35192e-07	-2.37408	Receptor kinase 3 isoform 1 [Theobroma cacao]
gene22117	2.54249e-89	-3.84234	PREDICTED: UPF0496 protein At4g34320-like [Glycine max]
gene24991	0.000990156	4.42679	hypothetical protein POPTR_0001s31880g [Populus trichocarpa]
gene22968	1.25098e-202	#NAME?	Jasmonate-zim-domain protein 10, putative [Theobroma cacao]
gene27476	8.67981e-93	-2.18609	PREDICTED: calcyclin-binding protein [Vitis vinifera]
gene39414	2.0218e-09	-3.85143	PREDICTED: myb-related protein Myb4-like [Populus euphratica]
gene30021	3.79865e-89	-4.80636	kinase, putative [Ricinus communis]
gene2437	4.8435e-93	-3.55414	PREDICTED: uncharacterized protein LOC103973678 [Musa acuminata subsp. malaccensis]
gene5218	8.23071e-38	2.84361	PREDICTED: cytochrome P450 705A20-like [Fragaria vesca subsp. vesca]
gene8950	1.53847e-10	-6.76568	PREDICTED: serine/threonine-protein kinase HT1-like [Fragaria vesca subsp. vesca]
gene8402	5.13889e-163	3.20646	PREDICTED: probable uridine nucleosidase 2 [Prunus mume]
gene11952	5.47043e-17	-2.70529	PREDICTED: cell wall / vacuolar inhibitor of fructosidase 2-like [Fragaria vesca subsp. vesca]
gene27600	8.37394e-20	-4.00781	hypothetical protein POPTR_0004s01580g [Populus trichocarpa]
gene21637	1.71553e-64	-2.27648	hypothetical protein POPTR_0001s10880g [Populus trichocarpa]
gene22694	1.76204e-11	#NAME?	hypothetical protein PRUPE_ppa003966mg [Prunus persica]
gene30228	5.77822e-08	-4.20847	unknown [Picea sitchensis]
gene16084	7.472e-69	-4.62128	Calcium-dependent protein kinase 2 [Morus notabilis]
gene24466	2.82407e-22	-4.25698	Late embryogenesis abundant hydroxyproline-rich glycofamily protein, putative [Theobroma cacao]
gene15238	8.70014e-06	-3.10936	PREDICTED: 5&apos;-adenylylsulfate reductase 3, chloroplastic-like [Prunus mume]
gene21372	3.01543e-12	8.11968	Salicylate O-methyltransferase [Theobroma cacao]
gene31635	0.000100874	2.52622	PREDICTED: vacuolar protein sorting-associated protein 45 homolog isoform X1 [Vitis vinifera]
gene5928	2.48342e-25	-7.68384	endochitinase [Castanea sativa]
gene28985	5.26664e-10	5.82113	PREDICTED: probable transcriptional regulator SLK3 isoform X1 [Vitis vinifera]
gene38959	1.35232e-43	-4.11721	PREDICTED: probable calcium-binding protein CML47 [Malus domestica]
gene4933	2.633e-64	-6.22028	PREDICTED: uncharacterized protein LOC100245494 [Vitis vinifera]
gene25800	1.12073e-39	4.28468	hypothetical protein PGTG_20902 [Puccinia graminis f. sp. tritici CRL 75-36-700-3]
gene20147	1.23985e-08	#NAME?	PREDICTED: uncharacterized endoplasmic reticulum membrane protein C16E8.02-like [Fragaria vesca subsp. vesca]
gene25082	1.45728e-60	#NAME?	PREDICTED: protein RER1A [Tarenaya hassleriana]
gene24153	3.66354e-10	-2.1285	PREDICTED: cysteine-rich receptor-like protein kinase 2 [Vitis vinifera]
gene13770	1.14545e-101	2.98793	Homeobox protein 20 [Theobroma cacao]
gene42302	1.01275e-25	2.59817	Two-component response regulator [Morus notabilis]
gene28949	5.64649e-16	Inf	Glutathione peroxidase 6 [Theobroma cacao]
gene9311	3.9322e-35	2.17129	Basic blue protein [Morus notabilis]
Walnut_newGene_5303	2.17038e-09	-2.71465	PREDICTED: uncharacterized protein LOC102599699 [Solanum tuberosum]
gene25078	2.99607e-123	-6.30426	Jasmonate-zim-domain protein 10, putative [Theobroma cacao]
gene35715	1.05096e-60	-3.66081	PREDICTED: serine/threonine-protein phosphatase 6 regulatory ankyrin repeat subunit B-like [Populus euphratica]
gene22720	4.55326e-88	-4.13701	LRR receptor-like serine/threonine-protein kinase, putative [Theobroma cacao]
gene20091	1.15086e-228	Inf	unknown [Lotus japonicus]
gene2299	2.89755e-11	Inf	PREDICTED: chitinase 2-like [Populus euphratica]
gene39645	2.77298e-14	2.61501	Photosystem I reaction center subunit PSI [Theobroma cacao]
gene42735	2.38283e-13	-2.21646	PREDICTED: nuclear valosin-containing protein-like [Pyrus x bretschneideri]
gene22803	7.10249e-24	#NAME?	PREDICTED: receptor-like protein kinase FERONIA [Vitis vinifera]
gene24865	3.23104e-15	-2.76649	unnamed protein product [Vitis vinifera]
gene1916	1.81515e-29	-2.75128	kinase, putative [Ricinus communis]
gene7256	1.22445e-31	-2.68423	PREDICTED: alpha-glucan phosphorylase, H isozyme [Vitis vinifera]
gene22425	2.41711e-06	3.75764	Alpha-N-arabinofuranosidase 1 precursor, putative [Ricinus communis]
gene27632	3.72341e-19	3.32774	PREDICTED: uncharacterized protein LOC102628083 isoform X2 [Citrus sinensis]
gene42997	7.73627e-08	-3.12107	conserved hypothetical protein [Ricinus communis]
gene26383	7.81298e-184	-9.89652	plasma intrinsic protein 2,1 [Juglans regia]
gene33811	0.000623398	2.16377	Two-component response regulator [Morus notabilis]
gene11863	3.39875e-23	2.59682	nam-like protein [Corylus heterophylla]
gene25606	2.62186e-06	-2.25289	PREDICTED: uncharacterized protein LOC103332755 [Prunus mume]
gene17201	5.81832e-37	#NAME?	hypothetical protein JCGZ_09872 [Jatropha curcas]
gene24157	6.78743e-29	-5.37997	Nitrate transporter2.5 [Theobroma cacao]
Walnut_newGene_3307	4.01294e-12	#NAME?	PREDICTED: F-box/kelch-repeat protein At1g55270-like [Pyrus x bretschneideri]
gene1526	5.81606e-07	2.16172	Cytochrome C oxidase copper chaperone isoform 1 [Theobroma cacao]
gene21395	1.72475e-51	8.80798	PREDICTED: very-long-chain (3R)-3-hydroxyacyl-[acyl-carrier protein] dehydratase PASTICCINO 2A [Prunus mume]
gene22246	2.92406e-239	8.29734	Auxin-responsive GH3 family protein [Theobroma cacao]
gene5185	5.11639e-21	#NAME?	PREDICTED: uncharacterized protein LOC104222351 [Nicotiana sylvestris]
gene34547	1.74506e-13	-2.05977	hypothetical protein CICLE_v10016917mg [Citrus clementina]
gene25592	5.05792e-71	-3.42991	U-box domain-containing protein 29 [Morus notabilis]
gene26908	2.21749e-07	6.32441	hypothetical protein POPTR_0016s08350g [Populus trichocarpa]
gene42157	1.04958e-87	-2.5822	PREDICTED: heat shock cognate 70 kDa protein 2 [Glycine max]
gene6789	4.9231e-20	-6.39354	PREDICTED: metacaspase-1-like [Fragaria vesca subsp. vesca]
gene37127	4.24559e-224	-9.25586	PREDICTED: U-box domain-containing protein 21-like [Vitis vinifera]
gene24632	5.09945e-176	-9.82969	hypothetical protein PHAVU_011G043300g [Phaseolus vulgaris]
gene35158	6.39631e-19	-2.11204	conserved hypothetical protein [Ricinus communis]
gene43181	2.49419e-11	-3.96006	hypothetical protein POPTR_0017s11770g [Populus trichocarpa]
gene27351	1.68352e-11	#NAME?	hypothetical protein POPTR_0003s09430g [Populus trichocarpa]
gene42263	4.40533e-60	-2.09779	PREDICTED: probable alpha,alpha-trehalose-phosphate synthase [UDP-forming] 9 [Vitis vinifera]
Walnut_newGene_5335	3.25159e-177	-3.22505	PREDICTED: alpha-amylase-like [Glycine max]
gene31425	2.13547e-08	-3.20007	hypothetical protein JCGZ_20454 [Jatropha curcas]
gene40311	1.65366e-15	#NAME?	PREDICTED: cationic peroxidase 1-like [Populus euphratica]
gene4876	2.19955e-67	#NAME?	hypothetical protein JCGZ_15984 [Jatropha curcas]
gene23719	9.05508e-10	#NAME?	PREDICTED: uncharacterized protein LOC105120268 isoform X1 [Populus euphratica]
gene11417	1.50535e-06	-2.90975	Cytochrome P450, family 81, subfamily K, polypeptide 2, putative [Theobroma cacao]
gene28092	4.80845e-24	-5.78719	uncharacterized protein LOC100305628 [Glycine max]
gene35973	6.09627e-22	-2.19038	Integrase-type DNA-binding superfamily protein, putative [Theobroma cacao]
gene38274	1.37863e-40	-2.0443	WRKY DNA-binding protein 48, putative isoform 1 [Theobroma cacao]
gene17120	5.38221e-37	7.3344	PREDICTED: uncharacterized protein LOC103962474 [Pyrus x bretschneideri]
gene28320	1.7368e-05	2.02979	ATP binding cassette subfamily B4 isoform 1 [Theobroma cacao]
Walnut_newGene_5150	1.36472e-23	Inf	potassium channel [Vicia faba]
gene24932	1.67791e-13	-3.69929	PREDICTED: L-type lectin-domain containing receptor kinase IV.1 [Vitis vinifera]
gene33555	1.67315e-64	-2.51078	hypothetical protein PRUPE_ppa025692mg [Prunus persica]
gene27210	4.2185e-30	-5.9898	PREDICTED: myb-related protein Myb4-like [Populus euphratica]
gene19465	5.31081e-39	-3.62885	PREDICTED: probable ADP-ribosylation factor GTPase-activating protein AGD13 [Vitis vinifera]
gene4940	1.55794e-115	-3.19891	hypothetical protein CICLE_v10002591mg [Citrus clementina]
gene21863	2.94681e-33	-2.81231	[Protein-PII] uridylyltransferase [Morus notabilis]
gene33035	4.39397e-21	-2.18346	PREDICTED: ras-related protein RABD1-like [Citrus sinensis]
gene138	4.27251e-57	-2.9288	PREDICTED: serine/threonine-protein kinase rio2-like isoform X1 [Malus domestica]
gene21960	1.9656e-24	4.28619	nucleic acid binding protein, putative [Ricinus communis]
gene21581	3.40418e-30	-4.57641	unnamed protein product [Vitis vinifera]
gene24954	6.02304e-40	-4.68335	PREDICTED: dirigent protein 2-like [Prunus mume]
gene2514	1.33415e-07	2.42547	PREDICTED: cryptochrome-1 isoform X1 [Populus euphratica]
gene14326	9.74327e-17	#NAME?	hypothetical protein CICLE_v10005818mg [Citrus clementina]
gene39667	1.7617e-05	-2.63983	hypothetical protein PRUPE_ppa010589mg [Prunus persica]
gene11883	8.04917e-28	2.06069	Mitogen-activated protein kinase kinase kinase ANP1 [Morus notabilis]
gene7054	1.30458e-16	-4.61006	PREDICTED: AP2-like ethylene-responsive transcription factor ANT isoform X2 [Vitis vinifera]
gene38595	3.22836e-18	-2.17914	hypothetical protein PRUPE_ppa001271mg [Prunus persica]
gene1279	2.90945e-25	-2.75256	hypothetical protein PRUPE_ppa003994mg [Prunus persica]
gene13415	2.62055e-122	-2.88984	PREDICTED: dolichol kinase [Prunus mume]
gene37160	1.46787e-28	-4.05683	hypothetical protein CISIN_1g042753mg [Citrus sinensis]
gene22245	1.12428e-22	-2.23112	Natural resistance-associated macrophage protein 3 [Theobroma cacao]
gene1015	1.23464e-14	4.43163	PREDICTED: cellulose synthase-like protein G2 [Vitis vinifera]
gene19984	1.82062e-15	2.25279	hypothetical protein VITISV_031373 [Vitis vinifera]
gene41696	1.0112e-39	-2.21786	putative protein phosphatase 2C 24 [Morus notabilis]
gene31984	1.16602e-117	#NAME?	Nodulin MtN21 /EamA-like transporter family protein isoform 1 [Theobroma cacao]
gene38163	3.61846e-306	-5.76246	hypothetical protein L484_002557 [Morus notabilis]
gene22596	2.08961e-10	Inf	PREDICTED: potassium channel AKT1 isoform X1 [Cucumis melo]
gene31197	7.58669e-09	-2.61902	PREDICTED: L-ascorbate oxidase-like [Citrus sinensis]
gene26739	3.99822e-06	-2.12644	PREDICTED: ocs element-binding factor 1-like [Prunus mume]
Walnut_newGene_247	2.19605e-25	#NAME?	hypothetical protein PRUPE_ppa024740mg [Prunus persica]
gene40542	2.32181e-49	-4.06575	Kinase, putative [Theobroma cacao]
gene24076	5.09511e-06	-2.96133	Squalene monooxygenase, putative [Ricinus communis]
gene5782	6.5018e-07	-2.97283	PREDICTED: casparian strip membrane protein POPTRDRAFT_763057-like [Citrus sinensis]
gene40944	4.23108e-92	-3.26736	Eukaryotic aspartyl protease family protein isoform 1 [Theobroma cacao]
gene40516	2.42702e-30	2.03945	RecName: Full=Myrcene synthase, chloroplastic; Flags: Precursor [Quercus ilex]
gene7641	1.26747e-255	-6.41951	duf246 domain-containing protein, partial [Morella rubra]
gene13844	3.8732e-21	7.441	PREDICTED: KH domain-containing protein At4g18375-like [Malus domestica]
gene13461	5.86515e-14	-2.25563	PREDICTED: probable aquaporin NIP5-1-like [Cucumis sativus]
gene13505	3.9124e-20	Inf	hypothetical protein PRUPE_ppa000873mg [Prunus persica]
gene14964	3.29723e-14	2.91969	hypothetical protein CICLE_v10001335mg [Citrus clementina]
gene29494	5.17214e-10	-6.20835	hypothetical protein CISIN_1g000630mg [Citrus sinensis]
gene13162	2.05847e-05	-2.56824	PREDICTED: CST complex subunit CTC1 [Malus domestica]
Walnut_newGene_6904	3.76238e-13	3.40958	--
gene23929	3.01512e-69	9.50662	PREDICTED: serine/threonine-protein kinase rio2-like isoform X1 [Malus domestica]
gene27096	2.85178e-79	-3.90119	PREDICTED: crocetin glucosyltransferase, chloroplastic-like [Vitis vinifera]
gene3149	3.42021e-20	-4.20576	PREDICTED: NADPH:quinone oxidoreductase [Vitis vinifera]
gene15943	1.00015e-19	-7.2853	PREDICTED: laccase-14-like [Eucalyptus grandis]
gene5569	1.91199e-94	-2.46973	PREDICTED: protein NDR1-like [Fragaria vesca subsp. vesca]
gene13487	1.37871e-06	-3.07329	PREDICTED: wall-associated receptor kinase 2-like [Malus domestica]
gene10419	4.55952e-10	2.15563	PREDICTED: cysteine-rich receptor-like protein kinase 42 [Vitis vinifera]
gene13256	1.63795524638527e-309	-4.86756	hypothetical protein POPTR_0014s098101g, partial [Populus trichocarpa]
gene27867	2.75846e-08	-2.47349	PREDICTED: uncharacterized protein LOC100265827 isoform X3 [Vitis vinifera]
gene35583	8.03344e-78	-5.14895	DNAJ heat shock family protein [Theobroma cacao]
gene34992	3.40198e-10	-2.83395	PREDICTED: probable inactive purple acid phosphatase 27 [Prunus mume]
gene24631	2.17061e-13	#NAME?	Calcium-binding protein CML38 [Medicago truncatula]
gene14597	1.19053e-36	2.46702	PREDICTED: nucleolar and coiled-body phosphoprotein 1 [Prunus mume]
gene6567	2.39321e-15	-4.11485	Alpha/beta-Hydrolases superfamily protein [Theobroma cacao]
gene41518	7.58033e-15	-2.72682	Triacylglycerol lipase 2 [Morus notabilis]
gene17024	1.21565e-14	#NAME?	hypothetical protein L484_005402 [Morus notabilis]
gene20032	4.08546e-20	#NAME?	GH3-1 [Quercus robur]
gene43288	3.6182e-49	-2.63654	PREDICTED: probable transmembrane ascorbate ferrireductase 4 [Malus domestica]
gene36507	3.11685e-139	-2.75767	PREDICTED: U-box domain-containing protein 14 [Vitis vinifera]
gene5081	3.33929e-109	#NAME?	PREDICTED: protein BEARSKIN1 [Malus domestica]
gene39416	6.41173e-17	-2.38707	Uncharacterized protein TCM_004037 [Theobroma cacao]
gene22937	5.25644e-59	2.6707	PREDICTED: glutathione transferase GST 23 [Vitis vinifera]
gene14136	0.000497933	3.76795	PREDICTED: probable LRR receptor-like serine/threonine-protein kinase At1g34110 [Prunus mume]
gene14596	0	-5.08446	Calcium-dependent protein kinase 2 [Morus notabilis]
gene27703	8.1292e-17	-5.01475	Calcium-binding EF-hand family protein [Theobroma cacao]
Walnut_newGene_1409	1.66419e-12	#NAME?	--
gene8316	4.49734e-19	-2.58082	JAZ2 [Hevea brasiliensis]
gene37139	2.22452e-11	4.80826	cytokinin receptor 1 [Betula pendula]
gene21580	1.03937e-22	#NAME?	hypothetical protein POPTR_0005s17370g [Populus trichocarpa]
gene8397	1.29144e-09	-2.11137	Late embryogenesis abundant protein Lea14-A, putative [Ricinus communis]
gene21666	1.52782e-20	-4.7551	PREDICTED: wall-associated receptor kinase-like 22 [Prunus mume]
gene8771	9.32625e-26	Inf	PREDICTED: uncharacterized protein LOC103327593 [Prunus mume]
gene26569	6.36327e-181	8.12266	PREDICTED: cytochrome P450 93A1-like [Fragaria vesca subsp. vesca]
gene2424	1.29381e-271	-4.20201	class IV chitinase [Corylus heterophylla]
gene37243	1.04627e-33	-6.29471	Plant invertase/pectin methylesterase inhibitor superfamily [Theobroma cacao]
gene42282	2.98173e-132	-3.06073	PREDICTED: snakin-2-like [Prunus mume]
gene2817	2.48607e-07	4.39602	PREDICTED: LOW QUALITY PROTEIN: cytochrome P450 71D9-like [Prunus mume]
Walnut_newGene_7323	2.98937e-18	#NAME?	galactose oxidase/kelch repeat protein [Medicago truncatula]
gene9324	9.89419e-61	-2.43725	PREDICTED: 3-ketoacyl-CoA thiolase 2, peroxisomal [Prunus mume]
gene8506	2.06284e-41	2.2627	Uncharacterized protein TCM_039778 [Theobroma cacao]
Walnut_newGene_2823	9.73475e-11	Inf	PREDICTED: nuclear transport factor 2-like [Musa acuminata subsp. malaccensis]
gene5054	0	-5.45939	PREDICTED: proline dehydrogenase 2, mitochondrial [Prunus mume]
gene10342	3.97712e-199	-3.82357	PREDICTED: leucoanthocyanidin dioxygenase-like isoform X1 [Populus euphratica]
Walnut_newGene_1941	6.27159e-09	3.26725	PREDICTED: ribosomal RNA small subunit methyltransferase E-like [Cicer arietinum]
gene23125	1.68639e-07	-2.13528	hypothetical protein PRUPE_ppa002029mg [Prunus persica]
gene33529	2.43719e-33	-6.64972	hypothetical protein PRUPE_ppa012907mg [Prunus persica]
gene34738	1.41435e-07	4.13051	PREDICTED: uncharacterized protein LOC103321874 [Prunus mume]
Walnut_newGene_7166	3.20793e-37	8.88891	hypothetical protein VITISV_041623 [Vitis vinifera]
gene22834	3.20248e-156	-2.9558	PREDICTED: 17.3 kDa class I heat shock protein-like [Nelumbo nucifera]
gene26294	9.42121e-18	-3.77355	PREDICTED: uncharacterized protein LOC103502365 [Cucumis melo]
gene9372	4.5538e-07	-5.06799	unnamed protein product [Vitis vinifera]
gene34799	7.97935e-39	#NAME?	AP2 domain-containing family protein [Populus trichocarpa]
Walnut_newGene_6841	1.06908e-05	2.35343	--
gene3118	3.4945e-25	2.76184	unnamed protein product [Vitis vinifera]
gene7789	7.3774e-30	-3.91342	AP2/ERF domain-containing transcription factor, putative [Theobroma cacao]
gene5027	1.16476e-24	-2.36704	PREDICTED: glycerophosphodiester phosphodiesterase GDE1-like [Pyrus x bretschneideri]
gene34197	2.37255e-11	#NAME?	Jasmonate-zim-domain protein 8, putative [Theobroma cacao]
gene6219	5.1257e-35	-3.21857	Uncharacterized protein isoform 1 [Theobroma cacao]
gene16030	8.84082e-14	-2.61939	PREDICTED: sodium-coupled neutral amino acid transporter 5-like [Prunus mume]
gene14374	2.32456e-91	-3.51061	Cellulose synthase-like B3, putative [Theobroma cacao]
gene14039	9.50545e-16	-2.48393	PREDICTED: uncharacterized protein LOC105107522 [Populus euphratica]
gene39346	1.56284e-119	-4.94524	PREDICTED: 3-ketoacyl-CoA synthase 19-like [Eucalyptus grandis]
gene13012	1.05569e-228	-4.17438	PREDICTED: probable WRKY transcription factor 41 [Populus euphratica]
gene28366	2.0736e-55	-3.81201	PREDICTED: uncharacterized protein LOC101294772 isoform 1 [Fragaria vesca subsp. vesca]
gene36310	1.35116e-29	-4.41695	PREDICTED: GDSL esterase/lipase At3g26430 [Nelumbo nucifera]
gene211	2.96091e-09	-2.33166	hypothetical protein glysoja_006552 [Glycine soja]
gene22966	7.79261e-09	-5.15327	P-loop containing nucleoside triphosphate hydrolases superfamily protein isoform 1 [Theobroma cacao]
gene39073	8.39648e-21	-3.11185	PREDICTED: uncharacterized protein LOC101206368 [Cucumis sativus]
gene21850	9.95299e-22	-3.51038	PREDICTED: G-type lectin S-receptor-like serine/threonine-protein kinase RLK1 [Prunus mume]
gene42017	0	-9.37072	PREDICTED: probable 1-deoxy-D-xylulose-5-phosphate synthase 2, chloroplastic [Vitis vinifera]
Walnut_newGene_121	3.64204e-24	Inf	Nicotinate-nucleotide pyrophosphorylase [carboxylating], putative [Ricinus communis]
gene12534	3.2079e-101	-2.98929	PREDICTED: RING finger and CHY zinc finger domain-containing protein 1 [Vitis vinifera]
gene41936	1.84935e-44	Inf	hypothetical protein JCGZ_22529 [Jatropha curcas]
gene35640	4.47263e-13	-2.91648	Proliferating cell nuclear antigen large form [Morus notabilis]
gene36520	4.57199e-58	2.02508	PREDICTED: probable receptor-like protein kinase At5g15080 [Vitis vinifera]
gene15804	6.05292e-27	-4.12766	hypothetical protein L484_023371 [Morus notabilis]
gene2270	9.29616e-41	-4.65073	Ethylene-responsive transcription factor [Morus notabilis]
gene1835	4.14055e-15	#NAME?	hypothetical protein JCGZ_14632 [Jatropha curcas]
gene1086	6.1742e-14	-3.59993	hypothetical protein VITISV_043784 [Vitis vinifera]
gene25123	8.81893e-166	-3.12317	PREDICTED: probable disease resistance protein At5g66900 [Vitis vinifera]
gene7005	7.38311e-24	-2.83113	conserved hypothetical protein [Ricinus communis]
gene27321	2.86316e-10	-4.89846	PREDICTED: L-type lectin-domain containing receptor kinase IX.1-like [Vitis vinifera]
gene2777	3.24465e-05	-3.09092	PREDICTED: probable long-chain-alcohol O-fatty-acyltransferase 5 [Prunus mume]
gene25040	5.09076e-10	Inf	Cysteine/Histidine-rich C1 domain family protein, putative isoform 2 [Theobroma cacao]
gene33543	0.000166608	5.64459	AUX/IAA transcriptional regulator family protein [Theobroma cacao]
gene17626	4.62721e-23	#NAME?	PREDICTED: TMV resistance protein N-like [Malus domestica]
gene21335	2.45166e-121	5.50247	protein phosphatase 2c, putative [Ricinus communis]
gene27846	1.50383e-11	2.70563	hypothetical protein CISIN_1g020537mg [Citrus sinensis]
gene1216	4.25083e-22	-2.46901	PREDICTED: TMV resistance protein N-like [Prunus mume]
gene2282	4.66513e-05	-5.25027	PREDICTED: protein YLS9-like [Pyrus x bretschneideri]
gene26123	1.97735e-11	-3.65343	Metacaspase 1, putative isoform 1 [Theobroma cacao]
gene21576	2.36804e-11	#NAME?	PREDICTED: peamaclein [Pyrus x bretschneideri]
gene20998	4.53182e-06	-3.1664	hypothetical protein EUTSA_v10015529mg, partial [Eutrema salsugineum]
gene38143	2.01544e-08	-2.1042	PREDICTED: protein ASPARTIC PROTEASE IN GUARD CELL 1 [Malus domestica]
gene9504	2.01859e-141	-3.03541	hypothetical protein VITISV_011681 [Vitis vinifera]
Walnut_newGene_1199	1.58865e-45	#NAME?	hypothetical protein VITISV_026680 [Vitis vinifera]
gene7886	2.1386e-10	-2.4788	PREDICTED: putative cell division cycle ATPase [Prunus mume]
gene13480	6.24874e-17	4.24439	Zinc finger protein 4 [Theobroma cacao]
Walnut_newGene_6769	1.74406e-20	Inf	--
gene9918	1.5362e-195	-3.87926	respiratory burst oxidase D [Manihot esculenta]
gene28702	8.9675e-09	-5.8327	PREDICTED: putative indole-3-acetic acid-amido synthetase GH3.9 [Vitis vinifera]
gene33065	8.90017e-28	-4.05527	Phosphatase 2C family protein [Theobroma cacao]
Walnut_newGene_165	2.37855e-06	2.40265	--
gene23496	3.49555e-100	#NAME?	PREDICTED: cyclic nucleotide-gated ion channel 1 [Sesamum indicum]
gene5384	8.27423e-115	#NAME?	glycine decarboxylase complex T, partial [Populus fremontii]
gene19034	1.08175e-07	-2.9679	unknown [Populus trichocarpa]
gene26973	2.01356e-103	-4.62641	PREDICTED: serine/threonine-protein kinase PBS1-like isoform X1 [Pyrus x bretschneideri]
gene5400	6.28319e-63	4.66149	hypothetical protein POPTR_0003s21900g [Populus trichocarpa]
Walnut_newGene_6141	6.13858e-14	3.89798	PREDICTED: zinc finger BED domain-containing protein RICESLEEPER 2-like [Elaeis guineensis]
gene34484	0	-12.2203	PREDICTED: small heat shock protein, chloroplastic-like [Malus domestica]
gene30216	8.89612e-18	Inf	PREDICTED: thaumatin-like protein 1-like isoform X2 [Cicer arietinum]
gene12732	1.10098e-86	-8.12178	PREDICTED: probable galacturonosyltransferase-like 1 [Nicotiana sylvestris]
gene22585	2.64746e-15	3.92897	PREDICTED: probable membrane-associated kinase regulator 2 [Vitis vinifera]
gene40635	1.65329e-86	-2.22355	Late embryogenesis abundant hydroxyproline-rich glycofamily protein, putative [Theobroma cacao]
gene41329	6.85601e-26	7.70888	PREDICTED: probable LRR receptor-like serine/threonine-protein kinase At1g07650 isoform X3 [Vitis vinifera]
gene22286	8.53926e-10	2.07996	PREDICTED: receptor-like protein 12 [Pyrus x bretschneideri]
gene21853	3.73301e-09	2.08368	PREDICTED: uncharacterized protein LOC100260982 [Vitis vinifera]
gene5390	3.37279e-135	-3.04878	LRR and NB-ARC domains-containing disease resistance protein, putative [Theobroma cacao]
gene40174	4.35633e-124	-3.27006	PREDICTED: remorin [Cucumis melo]
Walnut_newGene_3248	9.97935e-16	2.14518	hypothetical protein CISIN_1g002174mg [Citrus sinensis]
gene86	1.74684e-09	2.55262	PREDICTED: uncharacterized protein At2g29880-like [Vitis vinifera]
gene24607	4.25699e-17	2.02735	PREDICTED: uncharacterized protein LOC100793722 [Glycine max]
gene23516	1.73902e-36	-8.2664	hypothetical protein CICLE_v10020407mg [Citrus clementina]
gene20948	1.56101e-34	#NAME?	CYP71D51v3 [Nicotiana tabacum]
gene41290	5.10999e-20	-2.42286	hypothetical protein JCGZ_21657 [Jatropha curcas]
gene8904	2.01744e-99	-2.37301	PREDICTED: uncharacterized protein LOC103341189 [Prunus mume]
gene7351	3.62697e-07	5.03268	PREDICTED: uncharacterized protein LOC100257111 isoform X1 [Vitis vinifera]
gene31229	8.72715e-81	-2.08761	ER lumen protein retaining receptor family protein isoform 1 [Theobroma cacao]
gene37890	1.98424e-40	2.74032	hypothetical protein PRUPE_ppa016383mg [Prunus persica]
gene15519	1.90769e-14	-3.29471	PREDICTED: serine/threonine-protein kinase TIO [Vitis vinifera]
gene35882	0.000134209	-2.21108	PREDICTED: TMV resistance protein N-like [Pyrus x bretschneideri]
gene28161	4.07912e-15	2.37096	hypothetical protein CICLE_v10004215mg [Citrus clementina]
gene22156	2.40065e-06	3.49583	hypothetical protein POPTR_0005s01150g [Populus trichocarpa]
gene28843	3.726e-16	-2.35378	PREDICTED: probable serine/threonine-protein kinase WNK3 isoform X2 [Prunus mume]
gene27964	4.8695e-103	-7.99146	PREDICTED: cysteine-rich receptor-like protein kinase 10 [Vitis vinifera]
gene7201	3.70994e-27	-5.13866	photosystem I 11K family protein [Populus trichocarpa]
gene3495	8.29877e-249	-4.00141	PREDICTED: receptor-like protein kinase THESEUS 1 isoform X1 [Vitis vinifera]
gene14051	2.33385e-59	2.11515	PREDICTED: probable LRR receptor-like serine/threonine-protein kinase At2g24230 [Prunus mume]
gene40026	9.29319e-13	#NAME?	PREDICTED: serine/threonine-protein kinase CDL1 [Vitis vinifera]
gene12345	4.29457e-85	-2.13831	PREDICTED: acyl-coenzyme A oxidase 2, peroxisomal-like [Malus domestica]
gene7780	7.76758e-67	-2.09697	ABC2 isoform 1 [Theobroma cacao]
gene5025	1.00686e-276	-4.95013	hypothetical protein CICLE_v10016434mg [Citrus clementina]
gene4670	1.89016e-104	-2.51001	PREDICTED: beta-glucosidase 47-like [Prunus mume]
gene27169	1.50441e-07	6.44093	conserved hypothetical protein [Ricinus communis]
gene8082	4.41394e-08	-3.80349	PREDICTED: receptor-like protein 12 isoform X1 [Vitis vinifera]
gene8957	4.94147e-153	-6.16618	PREDICTED: peroxidase 55-like [Vitis vinifera]
gene31107	5.33174e-30	2.00904	PREDICTED: ubiquitin-40S ribosomal protein S27a-like [Populus euphratica]
gene14922	6.55617e-13	-2.0288	PREDICTED: proline-rich receptor-like protein kinase PERK1 [Nelumbo nucifera]
gene40544	9.49146e-187	-3.35359	Periplasmic beta-glucosidase precursor, putative [Ricinus communis]
gene42477	1.96726e-39	-6.52564	hypothetical protein EUGRSUZ_D02253 [Eucalyptus grandis]
gene11554	1.22813e-84	2.18651	hypothetical protein PRUPE_ppa008603mg [Prunus persica]
Walnut_newGene_460	8.79716e-31	Inf	hypothetical protein CISIN_1g042277mg, partial [Citrus sinensis]
Walnut_newGene_323	2.54284e-07	-2.79845	PREDICTED: uncharacterized protein LOC102591997 [Solanum tuberosum]
gene24449	2.21173e-23	2.9393	PREDICTED: uncharacterized protein LOC100261790 [Vitis vinifera]
gene7012	7.00297e-27	#NAME?	PREDICTED: cysteine-rich repeat secretory protein 38-like [Vitis vinifera]
gene38426	4.52294e-124	-4.55331	omega-3 desaturase family protein [Populus trichocarpa]
gene36587	2.79271e-34	2.45254	hypothetical protein CISIN_1g020553mg [Citrus sinensis]
Walnut_newGene_4454	1.13325e-243	#NAME?	hypothetical protein CICLE_v10003083mg [Citrus clementina]
gene13880	4.48435e-22	-4.16989	PREDICTED: BAG family molecular chaperone regulator 2-like [Prunus mume]
gene13677	4.03957e-11	#NAME?	Ethylene-responsive transcription factor, putative [Theobroma cacao]
gene28266	1.64956e-81	-2.02678	alpha-amylase [Vigna angularis]
gene35387	6.86355e-15	#NAME?	putative lacasse/diphenol oxidase [Castanea mollissima]
gene20068	1.11661e-59	-2.74002	superoxide dismutase [Cu-Zn] 4AP [Zea mays]
gene24868	3.18991e-78	4.84734	PREDICTED: uncharacterized protein LOC103340436 [Prunus mume]
gene6526	8.62644e-05	2.60951	PREDICTED: F-box protein At2g39490-like [Vitis vinifera]
Walnut_newGene_491	2.55718e-10	#NAME?	hypothetical protein POPTR_0019s14230g [Populus trichocarpa]
gene34962	3.17439e-20	-3.42581	Peroxidase superfamily protein [Theobroma cacao]
gene24618	1.91241e-09	2.71406	hypothetical protein CICLE_v10015910mg [Citrus clementina]
gene8911	2.21003e-23	2.1167	hypothetical protein PRUPE_ppa015388mg [Prunus persica]
gene5061	8.9529e-167	3.1326	Zinc finger protein CONSTANS-LIKE 2 [Theobroma cacao]
gene14186	6.80957e-18	-5.09619	PREDICTED: G-type lectin S-receptor-like serine/threonine-protein kinase RLK1 [Prunus mume]
gene38061	3.32102e-26	#NAME?	PREDICTED: U6 snRNA-associated Sm-like protein LSm2 [Malus domestica]
gene32030	9.58008e-06	-2.30046	conserved hypothetical protein [Ricinus communis]
gene24993	3.09319e-150	-2.99659	PREDICTED: heterogeneous nuclear ribonucleoprotein R-like isoform X1 [Nelumbo nucifera]
gene21501	3.43979e-06	2.08281	PREDICTED: WD repeat-containing protein 76 [Prunus mume]
gene38358	2.08247e-29	-2.781	PREDICTED: putative E3 ubiquitin-protein ligase LIN-1 isoform X2 [Vitis vinifera]
gene40072	8.76538e-33	-8.10069	hypothetical protein CICLE_v10009218mg [Citrus clementina]
gene12365	3.39996e-10	-2.65548	hypothetical protein POPTR_0018s13280g [Populus trichocarpa]
gene36606	8.83772e-11	-2.13123	Tetratricopeptide repeat-like superfamily protein [Theobroma cacao]
gene22915	3.37439e-37	-3.95757	hypothetical protein CISIN_1g0289242mg [Citrus sinensis]
gene21021	6.35246e-20	-2.78006	PREDICTED: probable disease resistance protein At5g66900 [Vitis vinifera]
gene27344	9.56077e-57	-3.09134	hypothetical protein POPTR_0005s07810g [Populus trichocarpa]
gene5398	4.08471e-12	4.69311	hypothetical protein JCGZ_22673 [Jatropha curcas]
gene11649	1.14669e-13	-3.08424	PREDICTED: uncharacterized protein LOC103328140 [Prunus mume]
gene6389	6.8556e-15	#NAME?	PREDICTED: cell division control protein 48 homolog D [Pyrus x bretschneideri]
gene38961	2.16891e-64	-3.88226	PREDICTED: probable calcium-binding protein CML47 [Malus domestica]
gene39127	7.34708e-11	4.0224	hypothetical protein PRUPE_ppa007932mg [Prunus persica]
gene41699	2.61192e-129	-2.74191	PREDICTED: tropinone reductase homolog At1g07440-like [Eucalyptus grandis]
gene5010	6.87425e-31	-2.16455	PREDICTED: aspartokinase 2, chloroplastic isoform X1 [Prunus mume]
gene36426	2.14356e-16	-2.84234	maternal effect embryo arrest 55-1, partial [Dimocarpus longan]
gene14083	8.92937e-06	2.04798	hypothetical protein PRUPE_ppa004340mg [Prunus persica]
gene16331	1.36785e-71	-8.3803	PREDICTED: probable LRR receptor-like serine/threonine-protein kinase At1g56130 [Vitis vinifera]
gene33316	2.28488e-33	2.17008	PREDICTED: MADS-box protein SVP isoform X2 [Nelumbo nucifera]
gene42645	0.000273949	3.48113	PREDICTED: ribulose bisphosphate carboxylase/oxygenase activase, chloroplastic isoform X2 [Vitis vinifera]
gene37440	4.48893e-124	-2.65207	PREDICTED: UDP-glucose 4-epimerase GEPI48-like [Cucumis melo]
gene4213	6.03642e-25	7.20634	Malectin/receptor protein kinase family protein, putative [Theobroma cacao]
gene42002	5.27193e-233	-4.28299	putative xyloglucan endotransglucosylase/hydrolase 23 -like protein [Gossypium arboreum]
gene24613	2.66991e-21	#NAME?	hypothetical protein JCGZ_22529 [Jatropha curcas]
gene169	1.96654e-31	-5.9152	PREDICTED: thaumatin-like protein 1b [Malus domestica]
gene41966	6.81527e-07	-4.3141	AP2 domain-containing transcription factor family protein [Populus trichocarpa]
gene7897	0	11.1717	hypothetical protein JCGZ_26037 [Jatropha curcas]
gene19073	1.81724e-17	#NAME?	PREDICTED: uncharacterized protein LOC104597604 [Nelumbo nucifera]
gene17753	6.608e-07	3.32321	PREDICTED: uncharacterized protein LOC101209679 isoform 1 [Cucumis sativus]
gene43052	1.03399e-15	Inf	hypothetical protein POPTR_0012s11410g [Populus trichocarpa]
gene5255	0	#NAME?	hypothetical protein POPTR_0006s05120g [Populus trichocarpa]
gene40776	1.6227e-30	-7.777	hypothetical protein JCGZ_10745 [Jatropha curcas]
gene3000	2.07322e-65	-2.46807	Phospholipase A1-Ibeta2 [Morus notabilis]
gene14828	5.5737e-61	-3.18924	PREDICTED: NAC transcription factor 29 [Prunus mume]
gene2089	5.30717e-154	-3.46771	Serine/threonine-protein kinase [Morus notabilis]
gene41751	6.3132e-10	#NAME?	Cytochrome P450, family 715, subfamily A, polypeptide 1 [Theobroma cacao]
gene31668	2.10221e-63	-3.34082	hypothetical protein JCGZ_26237 [Jatropha curcas]
gene37336	3.05947e-11	5.68185	HCO3- transporter family [Theobroma cacao]
gene25943	6.25228e-41	-2.2978	GTP-binding protein era, putative [Ricinus communis]
gene5918	7.44666e-25	2.73999	hypothetical protein JCGZ_04999 [Jatropha curcas]
gene16577	9.39565e-16	#NAME?	PREDICTED: pectinesterase 2-like [Prunus mume]
gene40685	2.32173e-18	3.93238	PREDICTED: uncharacterized protein LOC103337496 [Prunus mume]
gene36699	9.28205e-55	-3.04804	hypothetical protein CICLE_v10029467mg [Citrus clementina]
gene28717	3.23146e-41	#NAME?	PREDICTED: heat stress transcription factor A-1d isoform X1 [Populus euphratica]
gene386	1.02924e-16	-3.24339	PREDICTED: omega-hydroxypalmitate O-feruloyl transferase [Vitis vinifera]
gene20359	7.67684e-08	2.94375	CC-NBS-LRR protein [Quercus suber]
gene31973	6.96302e-43	-5.40296	hypothetical protein JCGZ_23194 [Jatropha curcas]
gene36561	1.65025e-21	-2.26116	hypothetical protein CICLE_v10012179mg [Citrus clementina]
gene12366	8.91706e-164	-3.35245	hypothetical protein JCGZ_23799 [Jatropha curcas]
gene2519	1.41146e-05	-2.20312	Ethylene-responsive transcription factor 1B [Morus notabilis]
gene41757	0	-6.31981	PREDICTED: oxalate--CoA ligase-like [Vitis vinifera]
gene34859	1.92987e-20	-3.65341	PREDICTED: protein FAR1-RELATED SEQUENCE 2-like isoform X2 [Musa acuminata subsp. malaccensis]
gene29495	4.06419e-11	8.38704	PREDICTED: probable LRR receptor-like serine/threonine-protein kinase At1g53430-like [Fragaria vesca subsp. vesca]
gene29672	1.45049e-59	-3.86319	S-locus lectin protein kinase family protein isoform 1 [Theobroma cacao]
gene22836	2.01394e-44	-2.1801	Late embryogenesis abundant (LEA) hydroxyproline-rich glycoprotein family, putative [Theobroma cacao]
gene36516	4.57128e-06	-2.54362	putative pectate lyase 7 [Morus notabilis]
gene12627	1.61314e-83	-2.05831	SEC14 cytosolic factor family protein / phosphoglyceride transfer family protein isoform 1 [Theobroma cacao]
gene4642	4.15927e-24	#NAME?	PREDICTED: nascent polypeptide-associated complex subunit alpha-like protein 2 [Vitis vinifera]
gene25181	6.76156e-37	-5.96081	U-box domain-containing protein 20 [Glycine soja]
gene29261	1.95751e-64	-2.99066	hypothetical protein PRUPE_ppa001538mg [Prunus persica]
gene40014	6.17386e-81	-4.07412	hypothetical protein PRUPE_ppa000698mg [Prunus persica]
gene42577	7.98366e-248	-3.95059	Xyloglucan endotransglucosylase/hydrolase 16 [Theobroma cacao]
gene14198	1.97647e-16	2.20159	PREDICTED: probable receptor-like protein kinase At1g67000 [Malus domestica]
gene12136	1.91585e-86	-2.48295	Fatty acid/sphingolipid desaturase [Theobroma cacao]
gene12063	4.06774e-08	-3.99791	hypothetical protein PRUPE_ppa000171mg [Prunus persica]
gene10604	2.11916e-05	4.9249	PREDICTED: benzyl alcohol O-benzoyltransferase-like [Malus domestica]
Walnut_newGene_5558	9.34447e-08	-2.9843	Serine carboxypeptidase S28 family protein [Theobroma cacao]
Walnut_newGene_6186	2.2475e-08	2.0392	hypothetical protein ZEAMMB73_254247 [Zea mays]
gene38759	1.21211e-117	-4.54852	hypothetical protein PRUPE_ppa003926mg [Prunus persica]
gene15038	4.74036e-160	-4.78665	hypothetical protein POPTR_0002s11900g [Populus trichocarpa]
gene15796	1.64676e-12	3.07997	hypothetical protein JCGZ_25976 [Jatropha curcas]
gene38081	2.55792e-08	-3.35287	hypothetical protein PRUPE_ppa003782mg [Prunus persica]
gene21613	1.06816e-14	-2.37077	NB-ARC domain-containing disease resistance protein, putative isoform 2 [Theobroma cacao]
gene42217	9.96612e-15	#NAME?	PREDICTED: uncharacterized protein LOC103337179 [Prunus mume]
gene15222	1.50809e-11	-3.75816	PREDICTED: LRR receptor-like serine/threonine-protein kinase EFR-like [Fragaria vesca subsp. vesca]
gene24057	2.27813e-16	#NAME?	hypothetical protein L484_014239 [Morus notabilis]
gene19201	3.1873e-30	#NAME?	Cytochrome P450 [Theobroma cacao]
gene13096	3.19538e-59	-4.69063	Diphthamide biosynthesis protein, putative [Ricinus communis]
gene29352	7.40265e-53	-7.36075	uncharacterized protein LOC100802228 [Glycine max]
gene21303	3.00138e-30	-7.97224	hypothetical protein PRUPE_ppa021273mg [Prunus persica]
gene25776	4.95892e-45	-2.59938	putative xyloglucan endotransglucosylase/hydrolase 21 -like protein [Gossypium arboreum]
gene39690	1.15069e-63	-2.04989	Receptor-like protein kinase 1 [Theobroma cacao]
gene24809	5.68599e-33	Inf	hypothetical protein CICLE_v10015583mg [Citrus clementina]
gene30911	1.50282e-12	Inf	hypothetical protein OsI_03168 [Oryza sativa Indica Group]
gene19748	5.76873e-11	#NAME?	PREDICTED: protein ASPARTIC PROTEASE IN GUARD CELL 1 [Malus domestica]
gene3937	1.33251e-39	2.94121	hypothetical protein PRUPE_ppa022914mg, partial [Prunus persica]
gene15809	1.11678e-07	-2.35027	PREDICTED: 40S ribosomal protein S17-4-like isoform 1 [Cucumis sativus]
gene36251	2.51605e-41	#NAME?	hypothetical protein POPTR_0011s15310g [Populus trichocarpa]
gene24988	1.4374e-09	2.43052	hypothetical protein L484_017174 [Morus notabilis]
gene18774	5.2758e-36	-3.17471	PREDICTED: two-pore potassium channel 1-like [Prunus mume]
gene16050	0	-9.67999	Heavy metal transport/detoxification superfamily protein, putative [Theobroma cacao]
gene29859	1.56775e-119	-7.29851	PREDICTED: F-box protein PP2-B15 [Vitis vinifera]
gene32443	4.94317e-81	-5.035	PREDICTED: uncharacterized protein LOC100268097 [Vitis vinifera]
gene8774	0	-5.37379	Codeine O-demethylase [Morus notabilis]
gene2493	2.76201e-70	-5.02993	Metalloendoproteinase 1 precursor, putative [Ricinus communis]
gene17895	9.05096e-22	#NAME?	PREDICTED: uncharacterized protein LOC104602319 [Nelumbo nucifera]
Walnut_newGene_4889	1.66698e-13	3.77086	T4.18 [Malus x robusta]
gene33456	3.42347e-08	2.77759	unnamed protein product [Vitis vinifera]
gene3973	0.000101329	2.99596	hypothetical protein PRUPE_ppa000865mg [Prunus persica]
gene17429	2.40558e-17	#NAME?	PREDICTED: ethylene-insensitive protein 2 [Vitis vinifera]
gene8666	1.33056e-05	-2.43796	ABC-2 type transporter family protein isoform 1 [Theobroma cacao]
gene4126	9.30224e-79	-5.36063	CDP-diacylglycerol--glycerol-3-phosphate 3-phosphatidyltransferase, putative, partial [Theobroma cacao]
gene16092	1.96351e-09	-2.57943	PREDICTED: uncharacterized protein LOC103940443 [Pyrus x bretschneideri]
gene41886	1.41017e-32	3.51469	hypothetical protein OsJ_34551 [Oryza sativa Japonica Group]
gene32494	2.64974e-36	#NAME?	GDSL-like Lipase/Acylhydrolase superfamily protein [Theobroma cacao]
gene3624	2.65702e-14	-3.41394	hypothetical protein JCGZ_00977 [Jatropha curcas]
gene28018	1.6375e-54	#NAME?	unnamed protein product [Vitis vinifera]
gene29910	6.82364e-52	-4.81472	hypothetical protein CICLE_v10032973mg [Citrus clementina]
gene5912	4.91398e-54	-7.9374	PREDICTED: glutelin type-A 3 [Vitis vinifera]
gene3659	3.09451e-06	2.3539	PREDICTED: uncharacterized protein LOC104877623 isoform X2 [Vitis vinifera]
gene16802	7.94373e-92	-4.86911	endo-1,4-beta-glucanase 3 [Betula luminifera]
gene8294	5.44237e-26	-2.3609	unnamed protein product [Vitis vinifera]
gene24140	8.57486e-201	-3.43556	hypothetical protein PRUPE_ppa008184mg [Prunus persica]
gene16591	1.25982e-79	-2.13023	EXORDIUM like 3 [Theobroma cacao]
gene42511	2.16588e-51	2.6656	PREDICTED: uncharacterized protein LOC101309290 [Fragaria vesca subsp. vesca]
gene33826	6.70982e-59	-3.41938	hypothetical protein L484_010998 [Morus notabilis]
gene38641	6.97437e-09	2.10239	PREDICTED: uncharacterized protein At4g37920, chloroplastic [Prunus mume]
gene14487	1.67979e-10	-4.91938	PREDICTED: glucomannan 4-beta-mannosyltransferase 2-like [Pyrus x bretschneideri]
gene9082	6.5708e-158	-8.37787	PREDICTED: epidermis-specific secreted glycoprotein EP1-like [Vitis vinifera]
gene21491	1.4669e-26	2.60312	PREDICTED: G-type lectin S-receptor-like serine/threonine-protein kinase At1g11410 [Prunus mume]
gene22087	7.30563e-72	Inf	Small nuclear ribonucleoprotein E [Gossypium arboreum]
gene38963	4.99567e-103	-2.32361	putative lipoate-protein ligase A [Gossypium arboreum]
gene24830	9.79853e-05	2.48273	PREDICTED: trimethylguanosine synthase [Vitis vinifera]
gene25809	0	-5.72054	PREDICTED: uncharacterized membrane protein C2G11.09-like [Prunus mume]
gene32396	1.00099e-19	-4.69781	PREDICTED: probable receptor-like protein kinase At5g39020 [Malus domestica]
Walnut_newGene_6879	8.35108e-50	3.66868	--
gene4896	1.22025e-205	-3.65005	s-adenosylmethionine synthetase, putative [Ricinus communis]
gene33394	1.16646e-07	2.31031	Heat Stress Transcription Factor family protein [Populus trichocarpa]
gene21943	4.83981e-278	-4.30221	peroxiredoxin-2B [Nelumbo nucifera]
gene11678	4.75199e-09	2.22607	PREDICTED: pentatricopeptide repeat-containing protein At4g02820, mitochondrial isoform X1 [Vitis vinifera]
gene5275	1.13439e-59	-2.44163	PREDICTED: uncharacterized protein LOC104878720 [Vitis vinifera]
gene30420	1.79406e-212	-3.57204	berberine bridge enzyme [Hevea brasiliensis]
gene32736	2.0127e-19	2.40112	Cytochrome P450 82A3, putative isoform 1 [Theobroma cacao]
gene39555	4.86003e-26	#NAME?	PREDICTED: UDP-glycosyltransferase 82A1-like [Fragaria vesca subsp. vesca]
gene41662	0	-5.57174	18.2 kDa class I heat shock protein [Medicago truncatula]
gene22231	9.45777e-06	3.54586	hypothetical protein POPTR_0001s39360g [Populus trichocarpa]
gene30901	1.40016e-11	-2.9726	hypothetical protein EUTSA_v10015529mg, partial [Eutrema salsugineum]
gene26838	6.42002e-08	-2.50691	PREDICTED: probable sugar phosphate/phosphate translocator At5g04160 [Pyrus x bretschneideri]
gene2012	5.35658e-10	-4.0934	PREDICTED: probable leucine-rich repeat receptor-like protein kinase At1g35710 [Pyrus x bretschneideri]
gene24994	6.59428e-40	-3.19882	hypothetical protein CARUB_v10002452mg [Capsella rubella]
gene25909	8.15402e-14	2.42119	PREDICTED: probable receptor-like protein kinase At5g39020 [Vitis vinifera]
gene8093	2.8508e-05	-2.03167	hypothetical protein EUGRSUZ_H04126 [Eucalyptus grandis]
gene29794	1.51693e-91	-2.36576	PREDICTED: small heat shock protein, chloroplastic-like [Nelumbo nucifera]
gene8167	7.99357e-125	-10.2437	PREDICTED: bidirectional sugar transporter N3-like [Malus domestica]
gene18320	6.8629e-25	-5.17083	Jasmonate-zim-domain protein 10, putative [Theobroma cacao]
gene9034	2.55341e-43	-2.68857	Remorin, putative [Ricinus communis]
gene9638	3.09824e-25	-2.09699	hypothetical protein JCGZ_18686 [Jatropha curcas]
gene40189	1.16658e-23	-2.15024	PREDICTED: TMV resistance protein N-like [Pyrus x bretschneideri]
Walnut_newGene_4084	2.06029e-22	-3.57733	PREDICTED: uncharacterized protein LOC100853519 [Vitis vinifera]
gene26389	0	-12.1244	PREDICTED: TMV resistance protein N-like [Malus domestica]
gene12653	4.19947e-12	-3.2212	lipoxygenase [Corylus avellana]
gene1067	8.00004e-05	2.64856	PREDICTED: MATE efflux family protein DTX1-like [Fragaria vesca subsp. vesca]
gene3709	4.88323e-11	Inf	hypothetical protein CISIN_1g0071331mg, partial [Citrus sinensis]
gene26528	0.000821037	3.00346	Ser/arg-rich protein kinase 4 isoform 3 [Theobroma cacao]
gene7045	2.55065e-175	-3.1754	Annexin 5 isoform 1 [Theobroma cacao]
gene35568	4.21207e-201	-4.47679	hypothetical protein JCGZ_17554 [Jatropha curcas]
gene21783	6.63876e-10	-2.37992	protein kinase [Malus domestica]
gene32727	1.05365e-18	-4.95462	PREDICTED: auxin-induced protein 15A [Vitis vinifera]
gene33100	4.37314e-100	#NAME?	PREDICTED: F-box protein At1g78280 isoform X1 [Vitis vinifera]
gene41663	2.05769e-168	-3.29367	18.2 kDa class I heat shock protein [Medicago truncatula]
gene19120	8.76008e-40	6.90851	Heavy metal transport/detoxification superfamily protein isoform 1 [Theobroma cacao]
gene31260	3.15537e-128	-2.94298	Arginine decarboxylase [Morus notabilis]
gene1423	4.59091e-100	-2.46135	putative rhamnose biosynthetic enzyme 1 [Morus notabilis]
gene341	1.22456e-307	-4.63953	Cytochrome P450 94A2 [Theobroma cacao]
gene3517	2.17618e-140	-6.56617	Auxin-responsive GH3 family protein [Theobroma cacao]
Walnut_newGene_5049	1.09405e-22	2.22924	MATE efflux family protein, expressed isoform 2 [Theobroma cacao]
gene14823	2.6277e-51	-5.21187	PREDICTED: expansin-like A2 [Populus euphratica]
gene36546	6.62445e-252	-4.13462	Galacturonosyltransferase-like 10 [Theobroma cacao]
gene11908	1.07972e-07	-2.60338	PREDICTED: cystinosin homolog [Eucalyptus grandis]
Walnut_newGene_4745	1.28813e-16	2.26442	PREDICTED: protein cornichon homolog 4-like [Malus domestica]
gene2512	4.98538e-17	-7.92445	Myb domain protein 13, putative [Theobroma cacao]
gene35322	0.000966792	2.27466	PREDICTED: uncharacterized protein LOC104426502 [Eucalyptus grandis]
gene23702	9.14463e-48	#NAME?	germin-like protein 1 [Populus trichocarpa]
gene41321	4.88207e-38	4.33278	hypothetical protein PRUPE_ppa000741mg [Prunus persica]
gene22897	2.67474e-16	-3.21527	PREDICTED: LOW QUALITY PROTEIN: cysteine--tRNA ligase, cytoplasmic-like [Cucumis melo]
gene39598	7.10247e-196	-3.5146	PREDICTED: lipase-like PAD4 [Populus euphratica]
gene38880	4.23301e-123	-7.05599	Aquaporin sip2.1, putative [Theobroma cacao]
Walnut_newGene_6055	5.84778e-10	5.52046	PREDICTED: cellulose synthase-like protein E6 [Vitis vinifera]
gene16026	6.93854e-07	Inf	hypothetical protein PRUPE_ppa017505mg, partial [Prunus persica]
gene38701	2.6726e-12	Inf	conserved hypothetical protein [Ricinus communis]
gene32061	1.83936e-42	-4.31048	uncharacterized protein LOC100500427 [Glycine max]
gene13876	8.75058e-174	-4.33097	PREDICTED: phospholipase A1-Igamma1, chloroplastic-like [Pyrus x bretschneideri]
gene31665	3.76703e-56	-2.21609	PREDICTED: 21 kDa protein [Vitis vinifera]
Walnut_newGene_677	1.48206e-12	-4.39807	--
gene14093	9.30151e-85	-2.0727	PREDICTED: calcium-dependent protein kinase 8-like [Cucumis sativus]
gene14808	8.51637e-10	#NAME?	PREDICTED: uncharacterized protein LOC100252183 [Vitis vinifera]
gene31543	1.62232e-40	-5.43738	PREDICTED: protein ODORANT1 [Vitis vinifera]
gene40603	0.000148197	-2.5598	hypothetical protein JCGZ_11773 [Jatropha curcas]
gene9746	6.65705e-129	-2.878	hypothetical protein PRUPE_ppa001038mg [Prunus persica]
gene13005	2.60057e-10	-3.83853	endo-beta-1,4-glucanase [Prunus persica]
gene350	5.42015e-09	2.57493	PREDICTED: probable inactive purple acid phosphatase 27 [Populus euphratica]
gene39060	3.76896e-13	3.03642	PREDICTED: uncharacterized protein LOC104903774 [Beta vulgaris subsp. vulgaris]
gene32454	1.21654e-18	4.34206	Heavy metal transport/detoxification superfamily protein isoform 1 [Theobroma cacao]
gene5257	1.10282e-246	-4.04235	hypothetical protein L484_018010 [Morus notabilis]
gene12022	5.11962e-08	4.20996	PREDICTED: protein YLS2 [Vitis vinifera]
gene32890	1.0023e-101	-4.33653	PREDICTED: ribonuclease 3-like [Prunus mume]
gene33541	1.95705e-05	2.44738	hypothetical protein PRUPE_ppa011212mg [Prunus persica]
gene20204	9.77739e-07	-2.68582	hypothetical protein POPTR_0002s210401g, partial [Populus trichocarpa]
gene38599	2.55707e-10	#NAME?	Phi class glutathione transferase GSTF7 [Theobroma cacao]
gene37151	1.19074e-09	-3.2941	hypothetical protein CICLE_v10031986mg [Citrus clementina]
gene15776	5.09983e-06	-2.96503	hypothetical protein CICLE_v10016641mg [Citrus clementina]
gene8013	1.15522e-09	#NAME?	Glyceraldehyde-3-phosphate dehydrogenase [Gossypium arboreum]
gene3261	1.38342e-59	-9.05194	Ethylene-responsive element binding factor 13, putative [Theobroma cacao]
gene37936	5.67223e-189	-8.97099	dioxygenase family protein [Populus trichocarpa]
gene16694	1.15675e-57	-9.89483	unnamed protein product [Coffea canephora]
gene29731	1.09989e-98	-8.31715	PREDICTED: probable quinone oxidoreductase-like [Glycine max]
gene29142	3.45598e-08	-2.92435	Exocyst subunit exo70 family protein H4 [Theobroma cacao]
gene24085	4.85717e-07	-2.12796	hypothetical protein CICLE_v10032808mg [Citrus clementina]
gene15279	5.5498e-206	-3.70438	PREDICTED: cytochrome b561 and DOMON domain-containing protein At5g47530-like [Nelumbo nucifera]
Walnut_newGene_591	2.35914e-42	4.6764	PREDICTED: beta-amyrin 28-oxidase-like [Eucalyptus grandis]
gene35725	5.09491e-14	#NAME?	PREDICTED: laccase-12-like [Malus domestica]
gene23367	3.50539e-45	-6.44559	PREDICTED: cytochrome P450 86A2-like [Fragaria vesca subsp. vesca]
gene22215	1.22676e-05	-2.3844	Ras-related protein RABA5c [Morus notabilis]
gene4769	4.4792e-20	-7.31847	hypothetical protein JCGZ_07079 [Jatropha curcas]
gene24309	1.21987252223482e-312	-4.97886	plastid jasmonates ZIM-domain protein [Hevea brasiliensis]
gene6677	0.000248118	3.84731	PREDICTED: probable inactive leucine-rich repeat receptor-like protein kinase At1g66830 [Prunus mume]
gene17445	1.09068e-05	2.25319	hypothetical protein EUTSA_v10015529mg, partial [Eutrema salsugineum]
gene20615	2.16722e-13	#NAME?	PREDICTED: probable chlorophyll(ide) b reductase NYC1, chloroplastic [Prunus mume]
gene21517	9.28676e-19	#NAME?	PREDICTED: uncharacterized protein LOC103949899 isoform X2 [Pyrus x bretschneideri]
gene8732	7.71785e-08	2.34677	putative pathogenesis-related family protein [Populus trichocarpa]
gene7242	2.21134e-32	-2.11675	PREDICTED: probable receptor-like protein kinase At5g47070 [Prunus mume]
gene36564	2.35023e-150	-3.89174	PREDICTED: senescence-associated carboxylesterase 101-like isoform X1 [Eucalyptus grandis]
gene38248	5.18804e-31	-3.7684	heat shock protein 17.7 [Populus trichocarpa]
gene32973	9.79659e-13	2.13791	UDP-glycosyltransferase 73B4, putative [Theobroma cacao]
Walnut_newGene_1713	2.96497e-05	2.56674	--
gene37347	9.35328e-16	-2.9161	hypothetical protein JCGZ_14070 [Jatropha curcas]
gene11575	1.53521e-52	-3.61116	PREDICTED: calcium-transporting ATPase 12, plasma membrane-type-like [Pyrus x bretschneideri]
gene32725	4.235e-08	3.47058	PREDICTED: disease resistance protein At4g27190-like isoform X1 [Citrus sinensis]
Walnut_newGene_1731	1.47466e-07	2.59367	PREDICTED: probable LRR receptor-like serine/threonine-protein kinase RFK1-like [Citrus sinensis]
gene10101	0.000206178	-2.97752	PREDICTED: centromere-associated protein E isoform X3 [Vitis vinifera]
gene9340	9.39237e-15	-3.40345	Two-component response regulator ARR22 -like protein [Gossypium arboreum]
gene15857	1.55603e-07	-2.33091	PREDICTED: heavy metal-associated isoprenylated plant protein 26 [Cucumis melo]
gene20485	3.81597e-26	-3.4476	l-allo-threonine aldolase, putative [Ricinus communis]
gene1051	7.48797e-135	-2.69951	PREDICTED: E3 ubiquitin-protein ligase RHA2A [Vitis vinifera]
gene25409	6.00179e-48	-3.92327	PREDICTED: DEAD-box ATP-dependent RNA helicase 35-like isoform X1 [Citrus sinensis]
gene21357	2.05281e-36	#NAME?	PREDICTED: probable pectate lyase 4 [Prunus mume]
gene8875	7.58364e-151	-2.95893	hypothetical protein PRUPE_ppa001921mg [Prunus persica]
gene6591	1.17443e-15	2.08928	DPP6 N-terminal domain-like protein [Theobroma cacao]
Walnut_newGene_4069	1.27785e-109	Inf	Adenine nucleotide alpha hydrolases-like superfamily protein isoform 1 [Theobroma cacao]
gene37943	2.44365e-305	-4.72165	Nine-cis-epoxycarotenoid dioxygenase 3 [Theobroma cacao]
Walnut_newGene_990	3.95934e-17	-3.07733	hypothetical protein JCGZ_22579 [Jatropha curcas]
Walnut_newGene_2911	5.26562e-22	#NAME?	Pyrophosphate--fructose 6-phosphate 1-phosphotransferase subunit beta [Gossypium arboreum]
gene2254	1.68921e-24	-2.92446	Basic helix-loop-helix DNA-binding family protein [Theobroma cacao]
gene32465	1.02779e-34	-7.61755	PREDICTED: cyclic nucleotide-gated ion channel 1-like [Pyrus x bretschneideri]
gene22428	2.99996e-06	-3.57131	brother of FT and TFL1 protein [Glycine max]
gene6569	6.48451e-07	-3.60438	hypothetical protein CICLE_v10033309mg [Citrus clementina]
gene2982	7.52546e-45	-5.84595	exocyst complex component sec3, putative [Ricinus communis]
gene10953	3.44269e-155	-2.93134	PREDICTED: NADP-dependent malic enzyme [Eucalyptus grandis]
gene18426	9.87775e-20	4.55958	hypothetical protein POPTR_0013s11090g [Populus trichocarpa]
gene7167	2.02096e-06	-2.35295	hypothetical protein PRUPE_ppa012566mg [Prunus persica]
gene5350	1.85286e-42	-2.12839	PREDICTED: dirigent protein 22-like [Malus domestica]
gene15952	1.6631e-10	-2.66194	PREDICTED: probable LRR receptor-like serine/threonine-protein kinase At4g08850 [Vitis vinifera]
gene11849	2.88938e-145	-2.93363	calmodulin-binding family protein [Populus trichocarpa]
gene38458	1.63913e-36	-4.82703	PREDICTED: glycerol-3-phosphate 2-O-acyltransferase 6 [Populus euphratica]
gene29471	6.89008e-35	-2.65929	PREDICTED: vegetative incompatibility protein HET-E-1 [Vitis vinifera]
gene5163	1.40705e-10	#NAME?	Uncharacterized protein TCM_008192 [Theobroma cacao]
gene3071	2.53799e-08	2.28419	hypothetical protein POPTR_0001s26960g [Populus trichocarpa]
gene26887	7.76625e-15	-2.50971	PREDICTED: uncharacterized protein LOC100249003 [Vitis vinifera]
gene589	1.63572e-21	-4.46654	hypothetical protein PRUPE_ppa003685mg [Prunus persica]
gene7399	1.17807e-05	2.98276	Pyridoxal-5\&apos;-phosphate-dependent enzyme family protein isoform 1 [Theobroma cacao]
gene16081	2.53949e-37	-3.64232	hypothetical protein JCGZ_08722 [Jatropha curcas]
gene5672	4.93145e-85	2.09479	hypothetical protein CICLE_v10025724mg [Citrus clementina]
gene41436	3.0408e-150	#NAME?	PREDICTED: thaumatin-like protein 1b [Malus domestica]
gene8140	1.44234e-85	-8.65869	Beta-propeller, Kelch repeat type 1, Development/cell death domain, Kelch related, Kelch-type beta propeller-like protein isoform 1 [Theobroma cacao]
gene13711	9.4881e-35	-3.80586	PREDICTED: basic 7S globulin [Vitis vinifera]
gene6494	2.64438e-55	-4.76078	PREDICTED: uncharacterized protein LOC103336678 [Prunus mume]
gene35346	2.13396e-34	-2.04139	PREDICTED: uncharacterized protein LOC100243388 [Vitis vinifera]
gene28414	0.000333589	-4.28988	hypothetical protein JCGZ_11597 [Jatropha curcas]
gene21399	2.34958e-08	Inf	hypothetical protein POPTR_0012s08770g [Populus trichocarpa]
gene26971	4.2406e-09	2.89317	PREDICTED: LOW QUALITY PROTEIN: Niemann-Pick C1 protein [Vitis vinifera]
gene24259	1.08846e-05	2.88849	PREDICTED: transcription factor EGL1 [Prunus mume]
gene22228	2.48173e-21	-2.72727	hypothetical protein L484_015849 [Morus notabilis]
gene27052	9.14949e-77	-2.14941	PREDICTED: protein CYPRO4 [Prunus mume]
gene27925	9.59498e-16	-2.36503	PREDICTED: receptor-like protein kinase HSL1 [Prunus mume]
gene14906	0.000184057	4.2765	PREDICTED: retrovirus-related Pol polyprotein from transposon TNT 1-94 isoform X5 [Tarenaya hassleriana]
gene23013	1.61659e-28	-2.81792	HCO3- transporter family [Theobroma cacao]
gene26302	2.20271e-136	-6.77851	pectin methylesterase family protein [Populus trichocarpa]
gene26484	4.75806e-28	-3.30343	PREDICTED: TMV resistance protein N-like [Glycine max]
gene13615	8.80278e-25	2.57185	PREDICTED: 60S ribosomal protein L7-4-like isoform X2 [Cucumis melo]
gene8736	2.48979e-24	-3.02466	hypothetical protein PHAVU_001G0732000g, partial [Phaseolus vulgaris]
Walnut_newGene_6408	1.24255e-14	2.21942	aspartyl-tRNA synthetase, putative [Ricinus communis]
gene32694	6.00635e-175	#NAME?	hypothetical protein CICLE_v10026251mg [Citrus clementina]
gene5114	1.36555e-257	-4.09448	PREDICTED: uncharacterized protein slp1 [Vitis vinifera]
gene41989	6.40822e-155	-7.36714	PREDICTED: probable beta-1,3-galactosyltransferase 16 [Prunus mume]
gene13893	3.83959e-05	3.1548	PREDICTED: WAT1-related protein At2g37460-like [Vitis vinifera]
gene1378	2.67208e-09	2.20144	PREDICTED: probable WRKY transcription factor 21 [Vitis vinifera]
gene15769	6.69685e-72	2.07198	hypothetical protein L484_027170 [Morus notabilis]
gene16932	3.94918e-20	2.9616	PREDICTED: transcription factor EGL1 [Prunus mume]
gene30718	5.19136e-07	-4.33658	PREDICTED: glucan endo-1,3-beta-glucosidase-like [Cucumis sativus]
gene9813	4.81594e-29	-2.06782	hypothetical protein JCGZ_18824 [Jatropha curcas]
gene9648	4.26393e-97	#NAME?	1-aminocyclopropane-1-carboxylate synthase [Populus x canadensis]
gene1907	7.86449e-19	3.5086	hypothetical protein JCGZ_12496 [Jatropha curcas]
gene1188	8.23703e-21	-5.09983	PREDICTED: uncharacterized protein LOC103400821 [Malus domestica]
gene38958	3.11829e-05	2.78913	Disulfide bond formation protein B 2, putative [Theobroma cacao]
gene11465	5.14816e-105	2.48107	hypothetical protein PRUPE_ppa001870mg [Prunus persica]
gene30806	0.000435045	4.37931	serine carboxypeptidase S10 family protein [Populus trichocarpa]
gene41505	1.02399e-06	6.36761	hypothetical protein CISIN_1g012100mg [Citrus sinensis]
Walnut_newGene_186	6.69843e-20	#NAME?	GH3 [Dimocarpus longan]
gene24098	1.57624e-108	-5.01599	PREDICTED: F-box protein PP2-A13-like [Glycine max]
gene1703	1.01907e-53	-4.76685	MADS-box transcription factor 12 [Pisum sativum]
gene13587	7.4719e-141	-2.81336	PREDICTED: probable WRKY transcription factor 48 [Vitis vinifera]
gene22493	6.55007e-17	Inf	hypothetical protein VITISV_004139 [Vitis vinifera]
gene41556	2.20993e-50	-2.06687	LRR receptor-like kinase [Medicago truncatula]
gene9414	4.4333e-22	-2.55995	PREDICTED: NAC domain-containing protein 74 [Cucumis melo]
gene34773	1.98584e-48	6.48284	hypothetical protein PRUPE_ppa004606mg [Prunus persica]
gene6221	3.69869e-24	3.0622	HSP20-like chaperones superfamily protein [Theobroma cacao]
gene40367	0.000193898	2.03319	hypothetical protein JCGZ_20640 [Jatropha curcas]
gene6737	2.092e-305	-4.5652	K-box region and MADS-box transcription factor family protein isoform 1 [Theobroma cacao]
gene37296	3.48026e-10	-3.42067	hypothetical protein PRUPE_ppa007621mg [Prunus persica]
gene4137	3.16262e-47	7.71635	PREDICTED: G-type lectin S-receptor-like serine/threonine-protein kinase At4g03230 [Prunus mume]
Walnut_newGene_3228	1.7518e-14	#NAME?	hypothetical protein CISIN_1g018321mg [Citrus sinensis]
gene30173	6.16297e-06	2.83118	PREDICTED: uncharacterized acetyltransferase At3g50280-like [Pyrus x bretschneideri]
gene24815	8.59313e-15	-2.54426	PREDICTED: MLO-like protein 12-like [Fragaria vesca subsp. vesca]
gene34813	4.59301e-17	-2.88058	PREDICTED: metacaspase-1-like [Cucumis sativus]
gene41289	4.35006e-16	2.44558	hypothetical protein JCGZ_21657 [Jatropha curcas]
gene38764	6.60398e-53	-6.4558	Methyl esterase 10, putative isoform 1 [Theobroma cacao]
gene18872	3.77264e-10	Inf	senescence-inducible chloroplast stay-green protein 2 [Glycine max]
gene21591	1.4441e-86	-2.1602	U-box domain-containing protein 5 [Morus notabilis]
gene41998	1.10978e-285	-4.61597	PREDICTED: probable xyloglucan endotransglucosylase/hydrolase protein 23 [Eucalyptus grandis]
gene39260	9.58868e-12	Inf	serine-threonine protein kinase, plant-type, putative [Ricinus communis]
gene33122	1.96242e-09	2.16873	PREDICTED: uncharacterized protein LOC103417884 [Malus domestica]
gene449	9.14471e-183	-3.37252	PREDICTED: apolipoprotein D [Populus euphratica]
gene9297	6.68448e-51	4.0546	hypothetical protein PRUPE_ppa001123mg [Prunus persica]
gene7941	2.39463e-177	-9.26803	PREDICTED: protein BONZAI 3-like [Pyrus x bretschneideri]
gene6223	3.01927e-45	-2.75468	hypothetical protein L484_025214 [Morus notabilis]
gene13380	3.53681e-23	#NAME?	hypothetical protein JCGZ_07597 [Jatropha curcas]
gene9629	3.45294e-18	-2.8806	Exocyst subunit exo70 family protein H4 [Theobroma cacao]
Walnut_newGene_570	3.05288e-16	Inf	PREDICTED: gibberellin-regulated protein 1-like isoform X2 [Nicotiana sylvestris]
gene42091	6.53844e-57	2.80804	Nitrilase 4 isoform 2 [Theobroma cacao]
gene23244	1.28862e-51	-5.29539	PREDICTED: kiwellin-like [Vitis vinifera]
gene12439	6.64153e-96	-3.03768	hypothetical protein POPTR_0006s25880g [Populus trichocarpa]
gene35850	0.000856826	2.03994	PREDICTED: cytochrome P450 84A1-like [Pyrus x bretschneideri]
gene8255	1.07048e-37	-4.12767	hypothetical protein JCGZ_25986 [Jatropha curcas]
gene21135	1.8632e-51	-3.1922	PREDICTED: rho GTPase-activating protein 5-like [Prunus mume]
gene14860	2.25676e-34	-4.99025	hypothetical protein CISIN_1g037913mg [Citrus sinensis]
gene23295	2.24671e-42	-4.30802	alanine-glyoxylate aminotransferase, putative [Ricinus communis]
gene18607	4.21105e-09	-2.14145	hypothetical protein JCGZ_23473 [Jatropha curcas]
gene32967	6.12003e-40	-4.57201	Phosphatase 2C family protein, putative [Theobroma cacao]
gene39599	4.27457e-100	-5.18397	hypothetical protein PRUPE_ppa004166mg [Prunus persica]
gene35771	2.4726e-76	-3.68056	hypothetical protein JCGZ_03320 [Jatropha curcas]
gene33579	2.68146e-89	2.13544	PREDICTED: probable LRR receptor-like serine/threonine-protein kinase At2g23950 [Prunus mume]
gene24191	0.000137854	2.30348	PREDICTED: uncharacterized protein LOC101310269 [Fragaria vesca subsp. vesca]
gene24196	0.000540454	2.0915	PREDICTED: protein NRT1/ PTR FAMILY 8.1-like [Eucalyptus grandis]
gene1866	5.3077e-13	2.63918	PREDICTED: 20 kDa chaperonin, chloroplastic [Solanum lycopersicum]
gene16861	7.30288e-11	4.96616	Squamosa promoter-binding protein-like transcription factor family protein, putative [Theobroma cacao]
gene31368	1.27347e-06	2.35881	WRKY transcription factor [Juglans sigillata]
gene3711	1.6667e-221	Inf	ATP synthase delta-subunit gene [Theobroma cacao]
gene21068	1.40912e-15	2.57179	hypothetical protein JCGZ_10726 [Jatropha curcas]
Walnut_newGene_716	2.96513e-05	#NAME?	PREDICTED: uncharacterized protein LOC103449856 [Malus domestica]
gene40836	0.000156187	-2.23302	hypothetical protein PRUPE_ppa012270mg [Prunus persica]
gene18909	1.81621e-17	#NAME?	PREDICTED: 7-deoxyloganetin glucosyltransferase-like [Vitis vinifera]
gene17931	2.87399e-14	#NAME?	CBF transcription factor [Juglans regia]
gene12347	1.48429e-88	-2.12197	PREDICTED: ethylene-responsive transcription factor ERF060-like [Pyrus x bretschneideri]
gene30159	1.25444e-82	-2.53857	DnaJ homolog subfamily C member [Medicago truncatula]
gene10290	6.39084e-34	-3.40736	Phosphatidylinositol-4-phosphate 5-kinase 1 [Morus notabilis]
gene30830	3.93398e-46	-4.57224	NAC transcription factor 037 [Jatropha curcas]
gene31091	1.00903e-60	-3.71543	PREDICTED: probable inactive poly [ADP-ribose] polymerase SRO2 [Vitis vinifera]
gene27563	5.32928e-30	-4.7247	Disease resistance response protein, putative [Ricinus communis]
gene4531	2.783e-19	-5.46981	PREDICTED: RPM1-interacting protein 4 isoform X1 [Sesamum indicum]
gene1001	1.49765e-20	2.07866	PREDICTED: 1-aminocyclopropane-1-carboxylate oxidase homolog 1 [Vitis vinifera]
gene42310	1.20512e-05	-2.73713	PREDICTED: microtubule-associated protein TORTIFOLIA1 [Prunus mume]
gene29873	1.23154e-21	-5.36624	PREDICTED: cytochrome c6, chloroplastic [Vitis vinifera]
gene10850	2.04336e-259	-4.065	PREDICTED: putative calcium-binding protein CML19 [Eucalyptus grandis]
gene21781	9.22955e-08	#NAME?	PREDICTED: uncharacterized protein LOC105136013 isoform X1 [Populus euphratica]
gene36829	1.27577e-69	4.2179	Receptor-like protein kinase HAIKU2 [Gossypium arboreum]
gene32495	5.34471e-276	-5.65034	PREDICTED: esterase-like [Prunus mume]
gene32322	2.50094e-07	3.25834	PREDICTED: uncharacterized protein PFB0145c-like isoform X1 [Populus euphratica]
gene40735	8.50885e-130	-4.41095	respiratory burst oxidase D [Manihot esculenta]
gene3971	2.57487e-18	#NAME?	PREDICTED: uncharacterized protein At1g18380-like [Eucalyptus grandis]
gene12340	6.17667e-07	-2.45888	PREDICTED: remorin [Populus euphratica]
gene34538	1.23437e-15	2.21185	RING/U-box superfamily protein, putative [Theobroma cacao]
gene23962	2.26872e-14	2.75801	Mitochondrial ribosomal protein L51/S25/CI-B8 family protein [Theobroma cacao]
Walnut_newGene_6096	2.73946e-129	-3.08025	hypothetical protein PRUPE_ppa016729mg [Prunus persica]
Walnut_newGene_3560	4.88881e-25	#NAME?	PREDICTED: arginine biosynthesis bifunctional protein ArgJ, chloroplastic isoform X2 [Sesamum indicum]
gene10324	2.60412e-111	3.67778	hypothetical protein PRUPE_ppa025692mg [Prunus persica]
gene20945	5.00412e-33	-2.27822	Leucine-rich repeat protein kinase family protein [Theobroma cacao]
gene10282	1.4157e-09	-4.79439	Annexin-like protein [Theobroma cacao]
gene13262	2.06059e-17	5.46811	PREDICTED: cytochrome P450 78A3 [Populus euphratica]
gene8155	5.56356e-112	8.74378	PREDICTED: putative F-box protein PP2-B12 [Nelumbo nucifera]
gene22925	3.06509e-137	-6.53704	PREDICTED: 18.1 kDa class I heat shock protein [Vitis vinifera]
gene7668	8.12637e-86	-2.47234	hypothetical protein JCGZ_10244 [Jatropha curcas]
Walnut_newGene_6409	3.22531e-28	3.21733	PREDICTED: aspartate--tRNA ligase-like isoform X1 [Cicer arietinum]
Walnut_newGene_1111	3.82491e-26	6.79489	hypothetical protein POPTR_0017s14090g [Populus trichocarpa]
gene30066	3.74759e-22	-4.1829	PREDICTED: putative transcription factor bHLH041 [Pyrus x bretschneideri]
gene31868	1.86067e-48	-2.61278	PREDICTED: protein cornichon homolog 4-like [Prunus mume]
gene5091	1.31792e-169	-4.14311	hypothetical protein JCGZ_06694 [Jatropha curcas]
gene16077	2.77767e-94	-2.48392	PREDICTED: uncharacterized protein LOC100259819 [Vitis vinifera]
gene24385	6.34119e-30	-6.47733	hypothetical protein PRUPE_ppa025692mg [Prunus persica]
Walnut_newGene_5932	8.69451e-13	2.02875	Uncharacterized protein isoform 1 [Theobroma cacao]
gene37242	4.92596e-97	-5.56286	PREDICTED: pectinesterase/pectinesterase inhibitor PPE8B [Prunus mume]
gene9534	3.98845e-81	-2.39281	EG45-like domain containing protein [Gossypium arboreum]
gene22558	1.48119e-96	-2.22951	Adenine nucleotide alpha hydrolases-like superfamily protein [Theobroma cacao]
gene25416	1.57635e-05	4.14033	Myb domain protein 106 [Theobroma cacao]
gene30865	2.01804e-06	-3.35741	PREDICTED: BI1-like protein [Eucalyptus grandis]
gene31722	1.66894e-07	2.24881	PREDICTED: bidirectional sugar transporter SWEET17-like [Prunus mume]
gene32185	0	-11.5627	hypothetical protein POPTR_0017s13270g [Populus trichocarpa]
gene11183	2.43179e-12	-3.84558	PREDICTED: uncharacterized protein LOC103959090 isoform X1 [Pyrus x bretschneideri]
gene1966	1.65264e-05	3.21854	PREDICTED: serine/threonine-protein kinase Nek2 [Vitis vinifera]
gene42094	3.52783e-11	2.72354	Uncharacterized protein TCM_041341 [Theobroma cacao]
gene39759	5.08016e-174	-7.73174	PREDICTED: elicitor-responsive protein 1 [Solanum lycopersicum]
gene38170	2.46157e-51	-8.81825	Uncharacterized protein TCM_040942 [Theobroma cacao]
gene18586	7.47612e-43	2.21163	tempranillo [Olea europaea]
gene16096	4.06597e-15	-2.20379	Syntaxin of plants 121 [Theobroma cacao]
gene12087	9.75135e-07	-2.13239	hypothetical protein EUGRSUZ_H02224 [Eucalyptus grandis]
gene3962	2.16177e-141	-5.25871	PREDICTED: uncharacterized protein LOC103950631 [Pyrus x bretschneideri]
Walnut_newGene_1579	5.76873e-11	#NAME?	putative adenine nucleotide translocase [Castanea sativa]
gene11497	2.77453e-07	3.5149	hypothetical protein JCGZ_01101 [Jatropha curcas]
gene12561	2.02779e-213	-3.79805	hypothetical protein L484_006392 [Morus notabilis]
gene12468	8.23472e-128	-3.12654	PREDICTED: cation transport regulator-like protein 2-like [Fragaria vesca subsp. vesca]
gene16927	2.75482e-06	2.72985	PREDICTED: uncharacterized protein LOC103337496 [Prunus mume]
gene40617	3.28947e-18	-7.15798	Cation/H+ exchanger 18 [Theobroma cacao]
gene15005	3.03737e-09	#NAME?	PREDICTED: ethylene-responsive transcription factor ERF021-like [Prunus mume]
gene19186	1.12288e-26	Inf	PREDICTED: glutaminyl-peptide cyclotransferase [Vitis vinifera]
gene38341	2.09114e-172	-4.3979	hypothetical protein L484_007200 [Morus notabilis]
Walnut_newGene_1349	4.93986e-05	5.14018	--
gene25034	6.98131e-21	8.9548	PREDICTED: organic cation/carnitine transporter 3-like [Nelumbo nucifera]
gene38709	5.0649e-87	-5.60548	hypothetical protein CICLE_v10010087mg [Citrus clementina]
gene15740	1.3586e-117	6.54253	PREDICTED: zinc finger protein 62-like [Malus domestica]
gene20053	5.69582e-30	8.25638	PREDICTED: TMV resistance protein N-like [Fragaria vesca subsp. vesca]
gene25293	3.82296e-233	-4.36966	hypothetical protein POPTR_0005s08940g [Populus trichocarpa]
gene6229	1.2202e-06	4.99701	PREDICTED: uncharacterized protein LOC104609039 [Nelumbo nucifera]
gene32312	1.88923e-105	-3.57654	Myb domain protein 20 [Theobroma cacao]
gene34337	1.18001e-05	4.01231	Leucine-rich repeat protein kinase family protein isoform 1 [Theobroma cacao]
gene35154	9.41158e-203	-7.59172	unnamed protein product [Vitis vinifera]
gene17443	2.02834e-41	-4.35366	PREDICTED: TMV resistance protein N-like isoform X2 [Populus euphratica]
gene38563	7.38848e-23	-3.14249	unnamed protein product [Coffea canephora]
gene9497	1.01481e-66	-2.27859	PREDICTED: uncharacterized protein LOC103487466 [Cucumis melo]
Walnut_newGene_7411	4.42816e-80	4.63419	hypothetical protein PRUPE_ppa006590mg [Prunus persica]
Walnut_newGene_3845	4.93936e-09	3.06625	PREDICTED: uncharacterized protein LOC100785268 [Glycine max]
gene42784	1.39418e-65	-2.82162	PREDICTED: proline dehydrogenase 2, mitochondrial [Prunus mume]
gene28855	4.70699e-37	4.1684	Uncharacterized protein isoform 1 [Theobroma cacao]
gene20868	3.82652e-65	#NAME?	eukaryotic translation initiation factor 5A isoform V family protein [Populus trichocarpa]
gene39827	4.21798e-68	-2.06141	Eukaryotic translation initiation factor 1A [Morus notabilis]
gene24270	2.17418e-09	-6.10581	hypothetical protein AALP_AA6G338500 [Arabis alpina]
gene43128	2.48628e-16	2.30093	LOB domain-containing protein, putative [Ricinus communis]
gene2302	1.35188e-09	-2.06928	Ankyrin repeat-containing protein [Morus notabilis]
gene15223	6.31212e-65	-2.17671	PREDICTED: glucose-6-phosphate/phosphate translocator 2, chloroplastic-like [Glycine max]
gene5822	3.32043e-11	3.03996	Eukaryotic translation initiation factor 3G1 [Theobroma cacao]
Walnut_newGene_7417	9.67736e-31	#NAME?	PREDICTED: uncharacterized protein LOC100244219 [Vitis vinifera]
gene41312	1.64078e-23	-6.64043	PREDICTED: GDSL esterase/lipase At5g45670-like [Prunus mume]
gene17470	9.79657e-24	-6.65522	hypothetical protein CISIN_1g0455341mg, partial [Citrus sinensis]
gene25955	4.30061e-11	2.77661	unnamed protein product [Vitis vinifera]
Walnut_newGene_7205	4.76768e-118	#NAME?	PREDICTED: probable carboxylesterase 18 [Cucumis melo]
gene37697	1.65888e-87	-6.81867	PREDICTED: uncharacterized protein LOC105128288 [Populus euphratica]
gene33812	2.20337e-59	-5.85923	unnamed protein product [Vitis vinifera]
gene35828	1.60608e-21	-3.85001	PREDICTED: NAC domain-containing protein 7 isoform X1 [Vitis vinifera]
gene29174	9.21573e-19	-4.04032	PREDICTED: putative receptor protein kinase ZmPK1-like [Glycine max]
gene20592	4.00971e-21	-5.11686	Pectinesterase/pectinesterase inhibitor PPE8B [Theobroma cacao]
gene13238	8.0116e-17	Inf	PREDICTED: dof zinc finger protein DOF3.7-like isoform X4 [Populus euphratica]
gene27038	1.61523e-47	Inf	PREDICTED: TMV resistance protein N-like [Prunus mume]
gene32362	2.39436e-50	-3.1808	PREDICTED: uncharacterized protein LOC100253584 [Vitis vinifera]
gene26597	1.025e-17	3.88809	hypothetical protein JCGZ_00239 [Jatropha curcas]
Walnut_newGene_120	2.64564e-11	-2.27667	hypothetical protein PRUPE_ppa025229mg, partial [Prunus persica]
gene2892	8.07808e-177	-4.63323	Stachyose synthase precursor, putative [Ricinus communis]
gene10866	2.61536e-167	-5.83787	hydrolase, hydrolyzing O-glycosyl compounds, putative [Ricinus communis]
gene9574	0.000180875	2.4394	Chaperone DnaJ-domain superfamily protein [Theobroma cacao]
gene27792	2.21841e-11	-4.27092	PREDICTED: acyl carrier protein 3, mitochondrial [Prunus mume]
gene28799	9.11645e-08	#NAME?	PREDICTED: UDP-glycosyltransferase 90A1-like [Vitis vinifera]
gene7049	9.29525e-24	#NAME?	hypothetical protein L484_013005 [Morus notabilis]
gene42785	9.39565e-16	#NAME?	hypothetical protein PRUPE_ppa007396mg [Prunus persica]
gene2272	4.19053e-88	-2.80977	hypothetical protein PRUPE_ppa007376mg [Prunus persica]
gene21884	1.98531e-15	-2.68249	PREDICTED: uncharacterized protein LOC100245192 [Vitis vinifera]
gene33090	9.50592e-06	4.4422	protein phosphatase 2c, putative [Ricinus communis]
Walnut_newGene_6955	1.21194e-14	Inf	O-acetylserine(thiol)-lyase [Vitis vinifera]
gene6175	1.49162e-35	-2.43139	Cytochrome c oxidase subunit 6a, mitochondrial -like protein [Gossypium arboreum]
gene31774	1.18988e-122	-3.86999	PREDICTED: TMV resistance protein N-like [Fragaria vesca subsp. vesca]
gene16947	1.51364e-148	-2.92038	PREDICTED: BTB/POZ domain-containing protein At5g41330 [Prunus mume]
gene22462	1.10683e-11	#NAME?	PREDICTED: uncharacterized protein LOC103336200 isoform X2 [Prunus mume]
gene13799	1.02166e-104	3.35407	hypothetical protein PRUPE_ppa025692mg [Prunus persica]
gene39652	2.81043e-17	-8.10596	PREDICTED: probable gamma-secretase subunit PEN-2 [Prunus mume]
gene1938	0	-10.9011	copalyl diphosphate synthase [Castanea mollissima]
gene26747	2.40682e-05	3.98004	PREDICTED: wall-associated receptor kinase 2-like [Vitis vinifera]
gene27117	2.21805e-52	-3.7626	Beta-galactosidase 3 isoform 1 [Theobroma cacao]
gene10776	9.16304e-33	-5.55801	hypothetical protein POPTR_0006s09010g [Populus trichocarpa]
gene17363	4.14544e-149	5.06499	hypothetical protein ARALYDRAFT_918901 [Arabidopsis lyrata subsp. lyrata]
gene41818	3.33397e-09	-5.0267	hypothetical protein CICLE_v10006227mg [Citrus clementina]
gene26462	3.37044e-10	2.45819	PREDICTED: protein NSP-INTERACTING KINASE 1 [Vitis vinifera]
gene32411	1.28417e-06	4.06473	Basic helix-loop-helix DNA-binding superfamily protein, putative [Theobroma cacao]
Walnut_newGene_697	7.71099e-05	-2.02063	PREDICTED: U-box domain-containing protein 33-like [Prunus mume]
gene25313	0.000590527	3.22975	PREDICTED: uncharacterized protein LOC105113285 [Populus euphratica]
gene21716	3.57344e-16	-3.41995	PREDICTED: serine carboxypeptidase-like 31 [Prunus mume]
Walnut_newGene_3964	3.77585e-17	-7.06835	hypothetical protein JCGZ_19964 [Jatropha curcas]
gene1102	1.34746e-45	-2.33267	kinase family protein [Populus trichocarpa]
gene32912	5.97563e-07	4.03832	PREDICTED: transcription factor TCP14 [Nelumbo nucifera]
gene4341	2.49951e-15	-3.03366	hypothetical protein PRUPE_ppa017191mg [Prunus persica]
gene4310	6.37655e-12	-2.12439	hypothetical protein PHAVU_001G218300g [Phaseolus vulgaris]
gene23974	3.79303e-34	-2.19566	PREDICTED: inositol-tetrakisphosphate 1-kinase 2 [Prunus mume]
gene11916	5.74101e-14	-2.05797	PREDICTED: thioredoxin H2 [Vitis vinifera]
gene1999	7.88958e-10	2.35	Serine/arginine repetitive matrix protein 2 isoform 1 [Theobroma cacao]
gene16219	8.80743e-05	5.23592	galactinol synthase [Coffea arabica]
gene39163	2.02845e-21	-2.79092	PREDICTED: uncharacterized protein LOC103335797 [Prunus mume]
gene6362	5.15091e-15	-2.26591	PREDICTED: G-type lectin S-receptor-like serine/threonine-protein kinase At1g34300 [Vitis vinifera]
gene9079	0.000312644	2.17407	PREDICTED: probable leucine-rich repeat receptor-like serine/threonine-protein kinase At3g14840 [Vitis vinifera]
gene20839	1.94103e-50	-3.57106	hypothetical protein PRUPE_ppa016463mg [Prunus persica]
gene40894	7.9583e-25	-3.30082	PREDICTED: probable leucine-rich repeat receptor-like protein kinase At1g35710 isoform X2 [Populus euphratica]
gene17073	2.7005e-14	#NAME?	eukaryotic translation initiation factor 4g [Carica papaya]
gene40138	3.26756e-07	-2.31111	PREDICTED: wall-associated receptor kinase-like 22 [Prunus mume]
gene16229	2.56831e-08	2.70865	protein disulfide isomerase [Quercus suber]
gene9565	6.49429e-88	-5.10764	hypothetical protein JCGZ_19891 [Jatropha curcas]
gene21589	6.91358e-09	-3.53407	PREDICTED: uncharacterized protein LOC103722155 [Phoenix dactylifera]
gene37850	3.24539e-13	6.63998	hypothetical protein PRUPE_ppa019242mg [Prunus persica]
gene23837	3.01483e-22	2.44298	hypothetical protein JCGZ_16079 [Jatropha curcas]
gene9512	1.86925e-15	5.48449	PREDICTED: receptor-like serine/threonine-protein kinase SD1-8 [Eucalyptus grandis]
gene30232	3.04014e-67	-2.05323	Glutaredoxin family protein, putative [Theobroma cacao]
gene1606	0	-5.07738	PREDICTED: uncharacterized protein LOC103941543 [Pyrus x bretschneideri]
gene1325	5.66898e-137	-2.90825	amino acid binding protein, putative [Ricinus communis]
gene9154	1.51545e-12	-2.6761	hypothetical protein PRUPE_ppa008653mg [Prunus persica]
gene21115	9.01686e-41	-4.29138	STELAR K+ outward rectifier isoform 1 [Theobroma cacao]
gene3762	1.03231e-62	-4.258	Nine-cis-epoxycarotenoid dioxygenase 3 [Theobroma cacao]
gene27663	3.12642e-11	-3.55053	E3 ubiquitin-protein ligase CHFR [Morus notabilis]
gene27889	2.02591e-249	-4.04398	hypothetical protein JCGZ_14449 [Jatropha curcas]
gene14842	2.24967e-20	3.00447	hypothetical protein PRUPE_ppa010660mg [Prunus persica]
gene360	4.96844e-05	3.76437	hypothetical protein CICLE_v10033613mg [Citrus clementina]
gene38737	0.000174001	-2.03167	NIMA-related serine/threonine kinase 1 isoform 1 [Theobroma cacao]
gene31026	1.87839e-26	-4.83904	PREDICTED: G-type lectin S-receptor-like serine/threonine-protein kinase RLK1 isoform X1 [Vitis vinifera]
gene11662	1.59458e-198	-3.44702	Auxin-responsive protein IAA1, putative [Ricinus communis]
gene10736	1.24077e-06	2.37948	UDP-glucosyl transferase 85A2 [Theobroma cacao]
gene2996	6.89262e-151	8.99428	PREDICTED: protein STRUBBELIG-RECEPTOR FAMILY 6-like [Solanum tuberosum]
gene38721	3.2348e-267	-4.24076	hypothetical protein CICLE_v10029328mg [Citrus clementina]
Walnut_newGene_279	2.33758e-49	#NAME?	PREDICTED: serine/threonine-protein kinase SRK2G [Tarenaya hassleriana]
gene26291	4.64618e-86	-2.27351	Copper amine oxidase family protein isoform 1 [Theobroma cacao]
gene2389	1.13239e-15	-4.53388	Myosin-J heavy chain [Morus notabilis]
gene22299	8.87264e-29	7.92041	PREDICTED: cinnamyl alcohol dehydrogenase 1 [Sesamum indicum]
gene14753	3.82242e-66	2.42561	Polyol transporter 5 [Morus notabilis]
gene7014	9.95727e-15	-5.55136	PREDICTED: tropinone reductase homolog At1g07440-like isoform X2 [Malus domestica]
gene12383	1.12487e-146	-5.61541	PREDICTED: NADP-dependent malic enzyme isoform X2 [Elaeis guineensis]
gene25166	1.05134e-09	-6.24111	PREDICTED: EID1-like F-box protein 3 [Vitis vinifera]
gene855	3.95621e-47	5.76695	PREDICTED: receptor-like protein kinase [Nelumbo nucifera]
gene17686	3.10003e-17	-2.82261	Late embryogenesis abundant (LEA) hydroxyproline-rich glycoprotein family, putative [Theobroma cacao]
Walnut_newGene_4463	5.10428e-12	4.52979	hypothetical protein VITISV_026810 [Vitis vinifera]
gene16793	3.87623e-13	#NAME?	Cyclin-like F-box; FAR1; Zinc finger, SWIM-type [Medicago truncatula]
gene34420	4.91584e-14	Inf	PREDICTED: ubiquitin-conjugating enzyme E2 22-like [Malus domestica]
gene42082	2.98884e-06	-2.30766	PREDICTED: probable trehalose-phosphate phosphatase C isoform X1 [Populus euphratica]
gene34596	4.96144e-33	5.04235	hypothetical protein PRUPE_ppa023071mg [Prunus persica]
gene4286	1.42473e-06	-2.3753	Uncharacterized protein TCM_004894 [Theobroma cacao]
gene15704	9.52719e-72	-3.05395	PREDICTED: thaumatin-like protein 1b [Malus domestica]
gene25477	2.25862e-211	-5.38274	K-box region and MADS-box transcription factor family protein isoform 3 [Theobroma cacao]
gene33321	5.9635e-71	-2.80805	PREDICTED: probable protein phosphatase 2C 63 [Nelumbo nucifera]
gene6544	2.4756e-13	7.40543	Ethylene-responsive transcription factor RAP2-7, putative isoform 1 [Theobroma cacao]
gene32986	7.07404e-43	3.07326	U-box domain-containing protein 26 [Morus notabilis]
gene12046	1.84688e-261	-9.52652	20 kDa chaperonin, chloroplastic -like protein [Gossypium arboreum]
gene24093	7.23914e-79	4.10183	PREDICTED: gibberellin 20 oxidase 1-like [Fragaria vesca subsp. vesca]
Walnut_newGene_93	0.000480617	2.35113	hypothetical protein L484_023686 [Morus notabilis]
gene30285	1.92067e-102	6.51098	ferric-chelate reductase, putative [Ricinus communis]
gene11602	2.34891e-12	-2.97583	PREDICTED: expansin-A4-like [Populus euphratica]
gene1386	1.22022e-09	-6.14177	hypothetical protein MIMGU_mgv1a016172mg [Erythranthe guttata]
Walnut_newGene_1077	5.51927e-69	#NAME?	PREDICTED: uncharacterized protein LOC100853265 [Vitis vinifera]
gene14852	8.11498e-18	#NAME?	Peptide transporter, putative [Ricinus communis]
gene22402	7.52299e-279	#NAME?	Uncharacterized protein F383_18135 [Gossypium arboreum]
gene25324	3.18566e-133	-4.69903	HCP-like superfamily protein with MYND-type zinc finger [Theobroma cacao]
gene13093	0	-4.90821	PREDICTED: myosin heavy chain kinase C-like [Malus domestica]
gene15117	1.96912e-78	2.01169	hypothetical protein CISIN_1g047379mg, partial [Citrus sinensis]
gene14611	6.92886e-12	-2.76394	SPX (SYG1/Pho81/XPR1) domain-containing protein / zinc finger (C3HC4-type RING finger) protein-related [Theobroma cacao]
gene32389	5.82645e-71	-2.91995	PREDICTED: putative glutamine amidotransferase PB2B2.05-like [Citrus sinensis]
gene37288	3.30732e-19	-4.80753	PREDICTED: probable glycosyltransferase At5g20260 isoform X2 [Pyrus x bretschneideri]
gene35052	2.59802e-39	-2.00223	hypothetical protein JCGZ_23014 [Jatropha curcas]
gene31972	1.13834e-20	3.70185	Non-intrinsic ABC protein 9 [Theobroma cacao]
gene35620	3.61457e-42	-4.00134	PREDICTED: cucumisin-like [Vitis vinifera]
gene40162	1.00489e-55	-6.16427	Cytosolic beta-glucosidase [Gossypium arboreum]
gene1156	5.32412e-209	-3.59506	PREDICTED: uncharacterized protein LOC100526885 isoform X1 [Glycine max]
gene8581	3.54336e-61	-3.09218	WRKY DNA-binding protein 40, putative isoform 1 [Theobroma cacao]
gene20001	3.17461e-16	5.20925	hypothetical protein EUGRSUZ_C03313 [Eucalyptus grandis]
gene30276	2.20788e-18	-5.91786	hypothetical protein POPTR_0012s08770g [Populus trichocarpa]
gene16029	3.94491e-49	-4.89825	PREDICTED: probable xyloglucan glycosyltransferase 12 [Eucalyptus grandis]
gene41448	3.49708e-92	2.65584	UDP-glucosyl transferase 85A2 [Theobroma cacao]
gene35997	4.81504e-96	-3.22509	PREDICTED: uncharacterized protein LOC103319705 [Prunus mume]
gene35051	8.69617e-75	2.07498	hypothetical protein PRUPE_ppa005267mg [Prunus persica]
gene34012	8.74461e-112	-7.83405	Cyclin-like F-box; FAR1; Zinc finger, SWIM-type [Medicago truncatula]
gene24115	5.09902e-12	Inf	PREDICTED: cytoplasmic tRNA 2-thiolation protein 2 isoform X1 [Malus domestica]
gene26127	7.13995e-06	-3.12299	PREDICTED: uncharacterized protein LOC103961606 [Pyrus x bretschneideri]
gene29214	3.39442e-06	2.61405	Leucine-rich repeat protein kinase family protein, putative [Theobroma cacao]
gene36375	2.28524e-88	4.11323	hypothetical protein JCGZ_21378 [Jatropha curcas]
gene1085	3.96241e-19	-2.20816	hypothetical protein L484_025877 [Morus notabilis]
gene41793	3.21808e-46	-3.06619	rhomboid protein Cycgl1703, partial [Quercus glauca]
Walnut_newGene_1994	1.01237e-12	-6.58836	hypothetical protein CISIN_1g011640mg [Citrus sinensis]
gene7611	3.44634e-205	-5.73803	hypothetical protein CICLE_v10005491mg [Citrus clementina]
gene10512	3.49482e-75	-2.63291	PREDICTED: bifunctional riboflavin biosynthesis protein RIBA 1, chloroplastic-like [Vitis vinifera]
gene22360	9.05550895333732e-315	#NAME?	PREDICTED: TMV resistance protein N-like [Pyrus x bretschneideri]
gene25387	5.42657e-26	-3.82254	PREDICTED: LRR receptor-like serine/threonine-protein kinase ERL1 isoform X3 [Vitis vinifera]
gene10550	2.06349e-05	-2.42262	hypothetical protein CICLE_v10031966mg [Citrus clementina]
Walnut_newGene_5155	1.79361e-06	2.07899	PREDICTED: kinesin-related protein 4-like [Eucalyptus grandis]
gene35499	7.20884e-284	-8.07197	PREDICTED: pathogenesis-related protein 5-like, partial [Malus domestica]
gene74	0	#NAME?	hypothetical protein JCGZ_24444 [Jatropha curcas]
gene18845	3.97293e-06	2.06424	PREDICTED: probable methyltransferase PMT5-like isoform X1 [Citrus sinensis]
gene21545	4.9531e-12	2.03215	PREDICTED: glutathione S-transferase [Vitis vinifera]
gene13722	7.66257e-61	-3.68312	PREDICTED: EID1-like F-box protein 3 [Vitis vinifera]
gene35283	1.16727e-87	-2.10985	Basic-leucine zipper transcription factor family protein, putative isoform 1 [Theobroma cacao]
gene38149	1.36092e-11	-2.15768	hypothetical protein POPTR_0012s05720g [Populus trichocarpa]
gene1331	6.34119e-30	-2.75816	PREDICTED: methylsterol monooxygenase 1-1-like [Populus euphratica]
Walnut_newGene_1320	1.32656e-17	#NAME?	--
gene20985	5.43441e-18	-2.22653	PREDICTED: protein LURP-one-related 15-like [Glycine max]
gene41336	7.92906e-47	-6.78545	unknown [Glycine max]
gene35897	1.53252e-33	-6.65531	Calcium-binding protein CML38 [Medicago truncatula]
gene30784	0.00020332	3.31244	Nine-cis-epoxycarotenoid dioxygenase 4 [Theobroma cacao]
gene39718	3.21901e-22	-5.71533	PREDICTED: late embryogenesis abundant protein Dc3 [Beta vulgaris subsp. vulgaris]
gene41304	5.78537e-18	-4.89753	hypothetical protein JCGZ_21644 [Jatropha curcas]
gene23508	2.78681e-14	3.81363	Ankyrin repeat-containing protein [Morus notabilis]
gene21619	1.21411e-13	#NAME?	PREDICTED: riboflavin biosynthesis protein PYRD, chloroplastic [Prunus mume]
gene6863	1.25393e-10	2.21611	PREDICTED: alcohol dehydrogenase-like 2-like [Citrus sinensis]
gene16535	6.19962e-23	2.75036	PREDICTED: 2-oxoglutarate-dependent dioxygenase DAO-like [Vitis vinifera]
gene23533	5.37825e-12	#NAME?	PREDICTED: zinc finger BED domain-containing protein RICESLEEPER 2-like isoform X1 [Nelumbo nucifera]
gene35365	3.71894e-06	-3.6296	PREDICTED: shugoshin-1-like isoform X1 [Citrus sinensis]
gene11533	2.69158e-297	-5.4708	hypothetical protein CISIN_1g021436mg [Citrus sinensis]
gene42199	7.78474e-09	-2.64966	PREDICTED: G-type lectin S-receptor-like serine/threonine-protein kinase SD1-13 [Vitis vinifera]
gene32774	2.26198e-73	#NAME?	PREDICTED: hydrophobic protein RCI2B-like, partial [Glycine max]
gene29063	4.03306e-110	-3.37955	hypothetical protein CICLE_v10000783mg [Citrus clementina]
gene31121	9.49146e-187	-3.36414	Coiled-coil domain-containing protein 109A isoform 1 [Theobroma cacao]
gene22150	6.61879e-68	-2.27739	PREDICTED: chaperone protein dnaJ 11, chloroplastic [Cucumis melo]
gene38376	4.33495e-23	-4.91446	PREDICTED: vesicle-associated membrane protein 724 [Nicotiana sylvestris]
gene16814	2.71918e-05	2.48557	nitrate transporter, putative [Ricinus communis]
gene31654	8.01125e-34	-2.25791	hypothetical protein POPTR_0001s00620g [Populus trichocarpa]
gene22219	1.49361e-26	-2.56014	PREDICTED: dCTP pyrophosphatase 1-like [Vitis vinifera]
gene41469	4.8054e-41	-2.31671	FH interacting protein 1 isoform 1 [Theobroma cacao]
gene34504	3.04949e-08	2.1057	PREDICTED: DNA mismatch repair protein MSH1, mitochondrial-like [Sesamum indicum]
gene30119	4.36228e-45	Inf	PREDICTED: replication protein A 14 kDa subunit B [Prunus mume]
gene16101	6.79038e-110	#NAME?	PREDICTED: E3 ubiquitin-protein ligase PUB23-like [Vitis vinifera]
gene26476	7.46745e-62	-4.22229	PREDICTED: probable glycerol-3-phosphate acyltransferase 8 [Populus euphratica]
gene17529	4.05677e-32	#NAME?	unknown [Lotus japonicus]
gene29734	5.97455e-84	-3.39759	PREDICTED: uncharacterized permease C29B12.14c [Vitis vinifera]
gene29036	5.32411e-42	3.11568	Kinase, putative [Theobroma cacao]
gene22644	5.12909e-80	-2.80053	hypothetical protein CICLE_v10004620mg [Citrus clementina]
gene29276	4.97759e-77	-2.32062	hypothetical protein JCGZ_15854 [Jatropha curcas]
gene15508	2.7629e-282	-5.18383	P-loop containing nucleoside triphosphate hydrolases superfamily protein, putative [Theobroma cacao]
gene22263	1.42164e-270	-4.32765	PREDICTED: F-box protein PP2-B15 [Vitis vinifera]
gene34618	1.34522e-05	-4.5272	Brassinosteroid insensitive 1-associated receptor kinase 1 precursor [Theobroma cacao]
gene31754	7.27621e-43	-3.00439	Basic helix-loop-helix DNA-binding family protein [Theobroma cacao]
gene17417	0	#NAME?	hypothetical protein JCGZ_26037 [Jatropha curcas]
gene16161	2.69898e-86	#NAME?	conserved hypothetical protein [Ricinus communis]
gene21871	2.17288e-58	2.92566	PREDICTED: 7-methylguanosine phosphate-specific 5&apos;-nucleotidase A-like [Glycine max]
gene5845	8.5442e-05	Inf	PREDICTED: annexin D4 [Prunus mume]
gene22230	3.71634e-05	2.99344	PREDICTED: probable leucine-rich repeat receptor-like serine/threonine-protein kinase At3g14840 [Sesamum indicum]
gene9230	3.50678e-166	-3.06301	PREDICTED: CASP-like protein 7-like isoform X1 [Glycine max]
Walnut_newGene_6880	0.000205068	2.833	--
gene2650	1.10585e-32	-4.48286	PREDICTED: probable xyloglucan endotransglucosylase/hydrolase protein 23 [Eucalyptus grandis]
gene11967	1.82881e-58	-2.41614	hypothetical protein PRUPE_ppa009540mg [Prunus persica]
gene25561	8.92144e-64	-4.00269	PREDICTED: benzyl alcohol O-benzoyltransferase [Prunus mume]
gene32545	3.71896e-19	#NAME?	PREDICTED: probable F-box protein At5g04010 [Pyrus x bretschneideri]
gene11259	2.44151e-62	-5.2746	hypothetical protein PRUPE_ppa022051mg [Prunus persica]
gene18027	1.03967e-05	-6.18837	PREDICTED: probable receptor-like protein kinase At5g39020 [Pyrus x bretschneideri]
gene41658	1.70825e-264	-4.53953	18.2 kDa class I heat shock protein [Medicago truncatula]
gene22183	1.99483e-49	-4.66133	PREDICTED: disease resistance RPP13-like protein 4 [Prunus mume]
gene31817	1.07132e-39	-2.87282	PREDICTED: mannosyl-oligosaccharide 1,2-alpha-mannosidase MNS1 [Vitis vinifera]
gene21461	9.74539e-25	-6.71269	PREDICTED: uncharacterized protein LOC103322025 [Prunus mume]
gene11350	1.45823e-158	-10.6385	PREDICTED: beta-glucosidase 12-like [Vitis vinifera]
gene11463	9.85259e-64	-4.34601	putative receptor protein kinase TMK1 [Morus notabilis]
gene3131	1.86775e-16	-3.05897	hypothetical protein JCGZ_24516 [Jatropha curcas]
gene26807	8.22999e-06	-2.03625	RING/U-box superfamily protein, putative [Theobroma cacao]
gene6875	1.84433e-29	-4.34531	PREDICTED: uncharacterized protein LOC102629057 [Citrus sinensis]
gene33674	6.69522e-139	-2.82628	mitogen-activated protein kinase 3 [Betula platyphylla]
gene28076	6.41072e-11	3.48106	hypothetical protein CISIN_1g012194mg [Citrus sinensis]
gene30014	6.39274e-09	2.50693	indole-3-acetic acid-amido synthetase GH3.5 [Betula platyphylla]
gene11807	4.85596e-07	-2.07902	hypothetical protein PRUPE_ppa003771mg [Prunus persica]
gene26831	3.32575e-06	3.91052	PREDICTED: long chain acyl-CoA synthetase 1-like isoform X1 [Glycine max]
gene31381	5.70638e-10	-2.8789	ribonucleoside-diphosphate reductase small chain, putative [Ricinus communis]
gene37001	3.52205e-19	-5.19751	PREDICTED: uncharacterized protein LOC103412113 [Malus domestica]
gene21252	2.65263e-85	-2.14588	Protein kinase APK1A, chloroplast precursor, putative [Ricinus communis]
gene24657	2.70823e-60	-6.43313	Nodulin MtN21 /EamA-like transporter family protein, putative [Theobroma cacao]
gene33637	2.59491e-84	-2.0703	conserved hypothetical protein [Ricinus communis]
gene25402	0	-6.27054	Tonoplast intrinsic protein 1,3 [Theobroma cacao]
gene7455	0	-6.85962	PREDICTED: U-box domain-containing protein 21-like [Malus domestica]
gene41735	1.11048e-76	-2.93611	PREDICTED: 36.4 kDa proline-rich protein [Populus euphratica]
gene13503	9.59892e-19	-7.41093	PREDICTED: uncharacterized protein LOC103950631 [Pyrus x bretschneideri]
gene12117	2.33235e-27	-2.55821	hypothetical protein PRUPE_ppa008956mg [Prunus persica]
gene37161	1.61673e-76	-2.05679	hypothetical protein JCGZ_11773 [Jatropha curcas]
gene17946	1.08825e-152	12.1859	Kinase, putative [Theobroma cacao]
gene16626	1.56427e-15	-4.34592	hypothetical protein JCGZ_22391 [Jatropha curcas]
gene9752	3.66294e-107	-2.45793	PREDICTED: serine/threonine-protein kinase pakB isoform X1 [Vitis vinifera]
gene28290	3.76885e-12	-4.04955	PREDICTED: formin-like protein 3 isoform X2 [Eucalyptus grandis]
gene7209	9.2417e-14	-3.23887	hypothetical protein PRUPE_ppa004915mg [Prunus persica]
gene40645	2.27618e-84	-2.20751	SGT1 [Pelargonium x hortorum]
gene8226	1.51964e-118	-2.62492	PREDICTED: uncharacterized protein LOC104599908 [Nelumbo nucifera]
gene11837	3.32808e-29	-3.17247	PREDICTED: probable inactive receptor-like protein kinase At1g65250 [Vitis vinifera]
gene36242	4.69342e-205	-3.48321	Uncharacterized protein TCM_015608 [Theobroma cacao]
Walnut_newGene_581	0	-6.80802	PREDICTED: gibberellin-regulated protein 1-like isoform X2 [Nicotiana sylvestris]
gene16816	5.39068e-32	2.94789	Uncharacterized protein TCM_019866 [Theobroma cacao]
gene16894	0	-7.36849	PREDICTED: microtubule-associated protein futsch-like isoform X5 [Citrus sinensis]
gene40827	1.15289e-26	-2.67499	hypothetical protein PRUPE_ppa002705mg [Prunus persica]
gene97	1.91095e-05	3.02579	hypothetical protein MIMGU_mgv1a019734mg [Erythranthe guttata]
Walnut_newGene_7088	6.59779e-12	5.36099	hypothetical protein POPTR_0012s05700g [Populus trichocarpa]
gene20290	4.18046e-10	-2.79569	PREDICTED: GDSL esterase/lipase At4g10955-like [Nicotiana sylvestris]
gene26246	0	-5.31936	hypothetical protein JCGZ_26969 [Jatropha curcas]
gene24789	2.20724e-81	-2.31951	Mitogen-activated protein kinase kinase kinase ANP1 [Morus notabilis]
gene8987	7.94228e-109	-8.39374	PREDICTED: protein NRT1/ PTR FAMILY 4.5-like [Pyrus x bretschneideri]
gene28444	5.07842e-81	-2.18951	unknown [Glycine max]
gene35584	1.8343e-08	-2.34124	PREDICTED: thioredoxin H2-like [Cicer arietinum]
gene41081	6.09531e-88	-3.71854	late embryogenesis abundant protein [Medicago truncatula]
gene40659	5.93119e-93	-4.93867	hypothetical protein JCGZ_20554 [Jatropha curcas]
gene30117	3.28549e-30	Inf	PREDICTED: UPF0481 protein At3g47200-like isoform X2 [Populus euphratica]
gene3215	3.02592e-93	-4.68081	Plant invertase/pectin methylesterase inhibitor superfamily protein [Theobroma cacao]
gene42763	7.80993e-22	-6.52013	PREDICTED: probable mannitol dehydrogenase [Pyrus x bretschneideri]
gene25066	3.17135e-98	-2.26958	hypothetical protein CICLE_v10016732mg [Citrus clementina]
gene14370	1.85387e-40	#NAME?	hypothetical protein VITISV_024689 [Vitis vinifera]
gene14506	1.37659e-33	-4.17187	Hemolysin A, putative [Ricinus communis]
gene4655	1.37539e-09	-2.21579	hypothetical protein PRUPE_ppa025225mg [Prunus persica]
gene24117	7.22898e-10	-4.26376	PREDICTED: transcription factor bHLH68-like [Vitis vinifera]
gene9822	2.59911e-14	-5.20524	hypothetical protein L484_002681 [Morus notabilis]
gene41461	6.94037e-13	#NAME?	PREDICTED: serine/threonine-protein kinase ppk15-like isoform X5 [Populus euphratica]
gene8469	4.1975e-232	-3.78128	hypothetical protein PRUPE_ppa000746mg [Prunus persica]
gene23247	1.97157e-162	-3.15541	hypothetical protein PRUPE_ppa004366mg [Prunus persica]
gene14982	2.46513e-107	-3.23928	Aspartic proteinase nepenthesin-1 precursor, putative [Ricinus communis]
gene38722	4.80186e-65	#NAME?	PREDICTED: uncharacterized protein LOC104879062 [Vitis vinifera]
gene11181	2.90075e-08	-2.64005	Myb-like HTH transcriptional regulator family protein, putative isoform 1 [Theobroma cacao]
Walnut_newGene_6114	6.71315e-64	-5.85592	hypothetical protein POPTR_0017s05540g [Populus trichocarpa]
gene31188	1.34826e-106	-3.53532	PREDICTED: subtilisin-like protease [Sesamum indicum]
gene33616	8.34583260906309e-314	-7.46172	PREDICTED: NAC domain-containing protein 90-like [Prunus mume]
gene8436	1.99209e-07	Inf	Iq-domain 31 isoform 2 [Theobroma cacao]
gene10134	2.52975e-47	-5.65357	PREDICTED: autophagy-related protein 8C-like isoform X1 [Citrus sinensis]
gene38802	1.23669e-59	3.76117	PREDICTED: BEL1-like homeodomain protein 2 [Vitis vinifera]
gene41657	2.75672e-214	-11.14	18.5 kDa class I heat shock protein [Glycine max]
gene14660	1.21706e-23	-3.78574	Concanavalin A-like lectin protein kinase family protein [Theobroma cacao]
gene7585	1.96425e-144	#NAME?	hypothetical protein CICLE_v10025225mg [Citrus clementina]
gene31672	7.71661e-27	-3.6033	hypothetical protein PRUPE_ppa000414mg [Prunus persica]
gene9954	7.95066e-36	-3.2409	putative Cys2-His2 zinc finger transcription factor [Juglans regia]
gene30270	1.97548e-19	Inf	PREDICTED: uncharacterized protein LOC104880556 [Vitis vinifera]
Walnut_newGene_3978	1.03551e-64	#NAME?	LEA protein [Juglans regia]
gene40456	2.64255e-109	-4.58326	hypothetical protein JCGZ_20061 [Jatropha curcas]
gene26941	8.37583e-28	-7.82602	PREDICTED: putative cyclin-B3-1 [Prunus mume]
gene26197	9.2006e-112	#NAME?	Kinase, putative [Theobroma cacao]
gene2826	0.00026939	2.83786	PREDICTED: retrotransposon-like protein 1 [Malus domestica]
gene21510	3.10184e-07	-2.70828	PREDICTED: cinnamoyl-CoA reductase 1-like [Prunus mume]
gene38927	2.27764e-15	3.13475	PREDICTED: transcription factor TCP15 [Vitis vinifera]
gene9037	1.43888e-23	-2.30661	PREDICTED: LOW QUALITY PROTEIN: annexin-like protein RJ4 [Malus domestica]
gene20844	1.66936e-08	-2.14435	PREDICTED: EG45-like domain containing protein [Prunus mume]
gene7863	2.02292e-08	-2.25444	PREDICTED: dof zinc finger protein DOF1.5 [Prunus mume]
Walnut_newGene_346	9.87797e-38	#NAME?	PREDICTED: ATP synthase subunit O, mitochondrial [Prunus mume]
gene38309	5.73251e-06	-3.4411	hypothetical protein PRUPE_ppa013937mg [Prunus persica]
gene3211	9.79735e-38	-2.43661	PREDICTED: uncharacterized protein LOC100244411 [Vitis vinifera]
Walnut_newGene_1070	4.62836e-23	#NAME?	PREDICTED: uncharacterized protein LOC100853265 [Vitis vinifera]
gene7107	6.73713e-08	-3.05632	PREDICTED: HIPL1 protein-like isoform X1 [Vitis vinifera]
gene28532	4.0525e-56	-3.73031	conserved hypothetical protein [Ricinus communis]
gene14994	3.20657e-30	-3.34662	PREDICTED: protein NRT1/ PTR FAMILY 5.4 [Malus domestica]
gene16245	7.03827e-49	-3.01603	PREDICTED: probable polygalacturonase non-catalytic subunit JP650 [Prunus mume]
gene12065	1.17858e-20	-2.70811	PREDICTED: transcription factor SPATULA isoform X1 [Prunus mume]
gene21032	3.14151e-07	5.6807	PREDICTED: dof zinc finger protein DOF3.4 [Vitis vinifera]
gene4873	3.91868e-119	-2.5934	PREDICTED: probable xyloglucan glycosyltransferase 12-like [Cucumis sativus]
gene33364	3.32441e-05	2.6453	PREDICTED: uncharacterized protein LOC103324693 [Prunus mume]
gene31216	3.45273e-09	-2.66034	hypothetical protein JCGZ_09256 [Jatropha curcas]
gene9650	2.95326e-125	-7.55147	WRKY transcription factor 23, putative [Theobroma cacao]
gene13684	1.29828e-10	-3.02666	PREDICTED: arabinogalactan peptide 20-like [Nelumbo nucifera]
gene15079	2.3276e-09	-4.00181	hypothetical protein POPTR_0005s15110g [Populus trichocarpa]
gene25217	7.95452e-74	-3.14697	hypothetical protein PRUPE_ppa008483mg [Prunus persica]
gene28622	1.12264e-39	-2.72069	PREDICTED: probable pectate lyase 5 [Nelumbo nucifera]
gene9895	3.35954e-201	-3.47517	3-hydroxy-3-methylglutaryl coenzyme A reductase [Corylus avellana]
gene34741	1.56957e-10	3.32473	unnamed protein product [Vitis vinifera]
gene32987	6.74735e-76	-6.32933	PREDICTED: PI-PLC X domain-containing protein At5g67130 [Glycine max]
gene7453	1.62202e-13	2.60509	cytokinin receptor 1 [Betula pendula]
gene40133	2.31723e-43	-4.58334	hypothetical protein POPTR_0016s01080g [Populus trichocarpa]
Walnut_newGene_6829	1.76933e-34	8.16682	--
gene31191	5.64565e-78	-2.40166	PREDICTED: indole-3-acetic acid-induced protein ARG2-like [Eucalyptus grandis]
gene38227	1.7204e-17	-2.98123	PREDICTED: ankyrin repeat-containing protein At5g02620-like [Malus domestica]
gene13638	1.27302e-46	-2.25734	PREDICTED: heat shock protein 83 [Prunus mume]
gene4104	2.13828e-05	2.45572	PREDICTED: germin-like protein subfamily T member 2 [Prunus mume]
gene16801	1.85878e-06	2.34502	hypothetical protein JCGZ_08228 [Jatropha curcas]
gene28966	8.01971e-21	-3.19363	putative protein phosphatase inhibitor [Gardenia jasminoides]
gene34698	7.2861e-19	5.78041	PREDICTED: annexin D3-like [Nelumbo nucifera]
gene12264	5.4362e-06	-3.46388	PREDICTED: probable GPI-anchored adhesin-like protein PGA55 [Prunus mume]
gene34445	1.47996e-10	5.40673	PREDICTED: WD repeat-containing protein YMR102C [Vitis vinifera]
gene1328	1.78751e-63	-2.39808	hypothetical protein CICLE_v10022790mg [Citrus clementina]
gene37388	1.43601e-122	#NAME?	Basic helix-loop-helix DNA-binding family protein, putative [Theobroma cacao]
gene10085	4.91828e-19	-3.25075	PREDICTED: receptor-like protein 12 [Vitis vinifera]
gene3548	4.3262e-10	-3.21521	PREDICTED: early nodulin-like protein 1 [Nelumbo nucifera]
gene12791	1.24789e-26	-3.92898	PREDICTED: uncharacterized protein LOC105139939 [Populus euphratica]
gene28509	4.58931e-08	2.00696	glutamine amidotransferase [Gossypium arboreum]
gene36072	6.30162e-118	2.64953	PREDICTED: uncharacterized protein LOC105118489 isoform X1 [Populus euphratica]
gene38239	1.21977e-09	-6.14189	PREDICTED: IAA-amino acid hydrolase ILR1-like 6-like [Glycine max]
gene12845	9.07658e-16	-2.35798	PREDICTED: tetratricopeptide repeat protein 7B [Eucalyptus grandis]
gene2381	2.91034e-15	#NAME?	PREDICTED: probable receptor-like protein kinase At1g67000 isoform X2 [Malus domestica]
gene30940	1.56664e-39	-2.84313	Calcium-binding EF-hand family protein [Theobroma cacao]
gene40317	4.03962e-14	-2.72743	LOB domain-containing protein, putative [Ricinus communis]
gene5414	2.68486e-29	2.29744	PREDICTED: 7-deoxyloganetin glucosyltransferase-like [Vitis vinifera]
gene37711	5.58213e-17	#NAME?	hypothetical protein JCGZ_13999 [Jatropha curcas]
gene4354	2.87817e-65	2.06869	hypothetical protein CICLE_v10013279mg [Citrus clementina]
gene23285	8.99613e-12	-5.1476	PREDICTED: LOW QUALITY PROTEIN: cysteine--tRNA ligase, cytoplasmic-like [Cucumis melo]
Walnut_newGene_6056	1.20513e-14	Inf	PREDICTED: uncharacterized protein LOC103413855 [Malus domestica]
gene23242	1.80521e-59	-6.10789	PAR1 protein [Theobroma cacao]
gene23867	6.68367e-41	3.57221	hypothetical protein PRUPE_ppa009621mg [Prunus persica]
gene22482	5.09588e-14	#NAME?	PREDICTED: probable mitochondrial chaperone BCS1-B [Prunus mume]
gene8773	1.19497e-07	-2.36843	Pyrophosphate-energized vacuolar membrane proton pump [Morus notabilis]
gene16240	3.42987e-247	-3.93888	PREDICTED: uncharacterized protein LOC103321766 [Prunus mume]
gene9337	1.32206e-45	3.69769	Phytochrome interacting factor 3-like 5, putative isoform 1 [Theobroma cacao]
gene24318	2.31504e-93	-9.76061	hypothetical protein PRUPE_ppa005308mg [Prunus persica]
gene27665	7.36629e-17	#NAME?	U-box domain-containing protein 20 [Glycine soja]
gene4460	4.57288e-68	-2.51518	PREDICTED: aspartic proteinase-like protein 2 [Prunus mume]
gene33448	8.12006e-69	-3.52704	hypothetical protein PHAVU_003G040800g [Phaseolus vulgaris]
gene28091	1.19528e-33	#NAME?	uncharacterized protein LOC100305628 [Glycine max]
gene7279	2.74639e-06	-3.92751	hypothetical protein ARALYDRAFT_475501 [Arabidopsis lyrata subsp. lyrata]
gene37845	2.04416e-21	-4.45924	monoxygenase, putative [Ricinus communis]
gene27088	6.72516e-22	-4.83969	PREDICTED: long chain acyl-CoA synthetase 2-like [Pyrus x bretschneideri]
gene21847	2.28407e-119	#NAME?	PREDICTED: probable small nuclear ribonucleoprotein F [Elaeis guineensis]
gene10275	7.28879e-93	#NAME?	Cationic peroxidase 2 precursor, putative [Ricinus communis]
gene37965	5.31337e-78	-3.95912	PREDICTED: phospholipase A1-Ibeta2, chloroplastic [Prunus mume]
gene13523	3.72111e-17	-2.12897	PREDICTED: pentatricopeptide repeat-containing protein At2g15980 [Vitis vinifera]
gene27207	1.45949e-230	#NAME?	S-locus lectin protein kinase family protein, putative isoform 2 [Theobroma cacao]
gene15167	3.13998e-44	-3.52937	PREDICTED: probable receptor-like protein kinase At5g39020 [Pyrus x bretschneideri]
gene9920	4.78231e-134	-2.88603	PREDICTED: uncharacterized protein LOC100255664 [Vitis vinifera]
gene10588	1.68348e-25	#NAME?	hypothetical protein CISIN_1g0280351mg [Citrus sinensis]
gene27128	1.54267e-24	-7.63312	PREDICTED: uncharacterized protein LOC103927583 [Pyrus x bretschneideri]
gene9358	9.10407e-166	-3.05348	Uncharacterized protein isoform 1 [Theobroma cacao]
gene26840	1.83684e-05	-2.93463	PREDICTED: glycerol-3-phosphate dehydrogenase [NAD(+)] GPDHC1, cytosolic [Prunus mume]
gene28459	1.67594e-15	2.5574	PREDICTED: GDSL esterase/lipase At5g03610 isoform X2 [Vitis vinifera]
gene9863	1.50172e-257	-5.79637	Expansin-like protein isoform 1 [Theobroma cacao]
gene5484	4.1366e-226	-9.27545	Boron transporter 4 [Morus notabilis]
gene36585	0.000249825	8.36735	PREDICTED: UDP-glycosyltransferase 90A1-like [Citrus sinensis]
Walnut_newGene_2008	1.96179e-06	Inf	conserved hypothetical protein [Ricinus communis]
gene35496	1.46918e-74	-9.41622	hypothetical protein VITISV_007440 [Vitis vinifera]
gene4114	6.45282e-19	#NAME?	PREDICTED: 5-formyltetrahydrofolate cyclo-ligase-like [Citrus sinensis]
gene32576	3.42591e-05	2.007	PREDICTED: spermidine hydroxycinnamoyl transferase [Nelumbo nucifera]
gene39777	1.28127e-16	2.22091	PREDICTED: UDP-glycosyltransferase 84B1 [Vitis vinifera]
gene37811	1.83856e-08	-2.12289	hypothetical protein PRUPE_ppa004083mg [Prunus persica]
gene31432	1.36472e-23	-2.60455	PREDICTED: probable polygalacturonase [Nelumbo nucifera]
gene16693	1.2345e-237	-4.729	Zinc-finger DNA binding protein, putative [Theobroma cacao]
gene39922	1.80449e-05	-2.79616	PREDICTED: TMV resistance protein N-like isoform X2 [Populus euphratica]
gene23228	8.96865e-15	-6.83135	Cytochrome P450 710A1 [Morus notabilis]
Walnut_newGene_7488	1.32064e-08	5.95917	PREDICTED: uncharacterized protein LOC104235740 [Nicotiana sylvestris]
gene24179	2.09021e-07	-2.81199	PREDICTED: tricyclene synthase EBOS, chloroplastic-like [Pyrus x bretschneideri]
gene737	3.86614e-28	#NAME?	HXXXD-type acyl-transferase family protein, putative [Theobroma cacao]
gene19017	9.04974e-07	3.74598	PREDICTED: abhydrolase domain-containing protein FAM108C1-like [Cucumis sativus]
gene9377	2.33756e-32	-2.47638	PREDICTED: uncharacterized protein LOC101294200 [Fragaria vesca subsp. vesca]
gene21402	6.46251e-83	11.0723	PREDICTED: probable aldo-keto reductase 1 [Prunus mume]
Walnut_newGene_525	6.94391e-13	#NAME?	PREDICTED: uncharacterized protein LOC105167219 [Sesamum indicum]
gene25966	2.24e-08	-2.05619	unknown [Glycine max]
gene4314	1.24351e-09	-3.92641	PREDICTED: protein notum homolog isoform X2 [Prunus mume]
gene11396	2.94164e-59	-3.00176	PREDICTED: somatic embryogenesis receptor kinase 1-like [Eucalyptus grandis]
gene21411	5.77618e-29	-6.06377	PREDICTED: poly [ADP-ribose] polymerase 1-like isoform X2 [Pyrus x bretschneideri]
Walnut_newGene_3226	1.03719e-200	-4.06298	unnamed protein product [Vitis vinifera]
gene29502	8.90502e-58	3.30477	PREDICTED: uncharacterized protein LOC100244201 [Vitis vinifera]
gene11546	8.92602e-46	-9.45085	hypothetical protein CICLE_v10019706mg [Citrus clementina]
gene21245	8.69766e-17	#NAME?	hypothetical protein PRUPE_ppa003878mg [Prunus persica]
gene21416	3.91243e-78	Inf	ribosomal protein L7Ae/L30e/S12e/Gadd45 [Populus trichocarpa]
gene27324	7.88913e-112	-9.0967	PREDICTED: 60S ribosomal protein L12 [Vitis vinifera]
gene946	1.09664e-10	6.85162	PREDICTED: transcription factor bHLH111 [Vitis vinifera]
gene14743	0.000291167	2.10757	PREDICTED: BURP domain-containing protein 3-like [Vitis vinifera]
gene27233	1.33216e-07	-3.64929	T1.1 [Malus x robusta]
gene6038	1.98985e-53	5.01988	hypothetical protein POPTR_0013s15160g [Populus trichocarpa]
gene12313	2.34464e-187	-7.71149	PREDICTED: calcium-transporting ATPase 2, plasma membrane-type [Vitis vinifera]
gene35976	9.46191e-22	-3.64642	PREDICTED: heat shock cognate 70 kDa protein 2-like [Populus euphratica]
gene36613	2.06846e-19	-2.10579	PREDICTED: uncharacterized protein LOC104419255 [Eucalyptus grandis]
gene29569	1.9057e-23	2.30186	PREDICTED: protein TRANSPARENT TESTA 12-like isoform X2 [Pyrus x bretschneideri]
Walnut_newGene_4102	5.50138e-28	2.08851	PREDICTED: pentatricopeptide repeat-containing protein At3g60050-like [Prunus mume]
gene24264	2.07152e-07	2.91627	PREDICTED: rho GDP-dissociation inhibitor 1-like [Eucalyptus grandis]
gene10984	3.36986e-217	-6.37785	PREDICTED: IAA-amino acid hydrolase ILR1-like 4 [Vitis vinifera]
gene27446	2.42871e-32	-5.72701	hypothetical protein PRUPE_ppa004259mg [Prunus persica]
gene36102	3.53612e-34	-5.61946	unnamed protein product [Vitis vinifera]
gene5977	6.78673e-14	#NAME?	PREDICTED: uncharacterized protein LOC100245201 [Vitis vinifera]
gene35767	1.44881e-24	2.67467	hypothetical protein POPTR_0019s08400g [Populus trichocarpa]
gene27594	0.000515546	-2.14734	[Protein-PII] uridylyltransferase [Triticum urartu]
gene4461	9.68563e-11	3.03426	GDSL esterase/lipase isoform 1 [Theobroma cacao]
gene5799	5.70046e-05	-2.12377	hypothetical protein JCGZ_24133 [Jatropha curcas]
gene554	5.44664e-08	2.1485	Major facilitator superfamily protein isoform 1 [Theobroma cacao]
gene8072	3.80386e-66	-2.11823	Fimbrin-like protein 2 [Morus notabilis]
gene378	5.5393e-84	-2.83307	hypothetical protein CICLE_v10031989mg [Citrus clementina]
gene6419	7.5412e-05	-2.12689	Saposin-like aspartyl protease family protein [Theobroma cacao]
gene14686	9.40568e-07	6.40648	unnamed protein product [Vitis vinifera]
gene21274	2.35676e-51	-5.6526	PREDICTED: uncharacterized protein LOC105136013 isoform X1 [Populus euphratica]
gene34074	9.19929e-170	-3.25647	PREDICTED: beta-galactosidase 8 [Vitis vinifera]
gene13383	1.6555e-05	2.19151	PREDICTED: LRR receptor-like serine/threonine-protein kinase ERECTA [Vitis vinifera]
Walnut_newGene_3974	1.21945e-09	2.28534	NAC domain transcriptional regulator superfamily protein, putative [Theobroma cacao]
gene2801	1.07058e-12	-2.29395	PREDICTED: protein TORNADO 1 [Prunus mume]
gene26443	1.64476e-10	-6.28534	PREDICTED: probable LRR receptor-like serine/threonine-protein kinase At4g36180 isoform X2 [Nelumbo nucifera]
gene34373	1.20718e-12	Inf	PREDICTED: UPF0481 protein At3g47200-like [Malus domestica]
gene3016	4.13223e-27	#NAME?	hypothetical protein PRUPE_ppa022115mg [Prunus persica]
gene4394	4.84569e-39	#NAME?	PREDICTED: 60S ribosomal protein L7-4-like isoform X2 [Cucumis melo]
gene40753	2.63468e-07	3.2242	PREDICTED: phototropin-2-like isoform X1 [Citrus sinensis]
gene30811	1.83497e-31	8.01987	PREDICTED: malonyl-CoA:anthocyanidin 5-O-glucoside-6&quot;-O-malonyltransferase-like [Cucumis sativus]
gene30982	3.02854e-99	2.56435	hypothetical protein JCGZ_17284 [Jatropha curcas]
gene38752	2.30418e-05	2.16428	PREDICTED: uncharacterized protein At1g03900-like [Glycine max]
gene1679	3.36255e-12	-3.38475	PREDICTED: uncharacterized protein LOC101265497 [Solanum lycopersicum]
gene20565	5.76784e-31	#NAME?	PREDICTED: uncharacterized protein LOC100261075 [Vitis vinifera]
gene9143	9.75182e-38	-2.45605	hypothetical protein POPTR_0010s10090g [Populus trichocarpa]
gene9417	1.49224e-223	-4.41477	PREDICTED: lysine-specific demethylase JMJ706-like isoform X1 [Populus euphratica]
gene36558	0	-6.02338	Zinc finger family protein [Theobroma cacao]
gene41537	6.83013e-41	#NAME?	hypothetical protein L484_025772 [Morus notabilis]
gene9081	1.68612e-29	#NAME?	PREDICTED: epidermis-specific secreted glycoprotein EP1-like [Malus domestica]
gene31192	4.45352e-30	-5.84707	PREDICTED: uncharacterized protein LOC103333977 [Prunus mume]
gene7384	8.01347e-160	-3.81679	Uncharacterized protein isoform 1 [Theobroma cacao]
gene36062	1.87656e-69	-2.52956	PREDICTED: uncharacterized protein LOC104606113 [Nelumbo nucifera]
gene36243	3.40758e-118	-2.49823	PREDICTED: uncharacterized protein LOC100247984 [Vitis vinifera]
gene17256	4.58179e-151	6.74745	PREDICTED: small heat shock protein, chloroplastic-like [Malus domestica]
gene40567	2.60972e-13	-2.7067	PREDICTED: syntaxin-22-like isoform X1 [Glycine max]
gene15962	3.64299e-09	2.20458	hypothetical protein PRUPE_ppa019516mg, partial [Prunus persica]
gene9809	3.23578e-16	-2.00025	hypothetical protein JCGZ_18818 [Jatropha curcas]
gene1369	2.11017e-41	-2.11165	hypothetical protein CICLE_v10019410mg [Citrus clementina]
gene20645	3.97056e-08	4.22932	3-epi-6-deoxocathasterone 23-monooxygenase [Glycine soja]
gene17734	1.06228e-07	3.73692	PREDICTED: uncharacterized protein LOC103699645, partial [Phoenix dactylifera]
gene34583	1.41643e-68	-2.67705	hypothetical protein PRUPE_ppa010287mg [Prunus persica]
gene2707	7.13691e-178	-3.34028	PREDICTED: protein translation factor SUI1 homolog 1-like [Cucumis sativus]
gene5961	3.11844e-84	2.45266	PREDICTED: probable carboxylesterase 12-like [Cicer arietinum]
gene15576	1.15342e-45	-2.29572	hypothetical protein JCGZ_04000 [Jatropha curcas]
gene20346	1.25727e-13	-3.97194	PREDICTED: TMV resistance protein N-like isoform X1 [Pyrus x bretschneideri]
gene42653	2.25886e-36	7.30902	hypothetical protein PRUPE_ppa006893mg [Prunus persica]
gene6493	6.94638e-36	2.68233	PREDICTED: catalase isozyme 1-like [Vitis vinifera]
gene34578	4.96536e-29	-2.53133	Tetraspanin family protein, putative isoform 1 [Theobroma cacao]
gene39177	1.21144e-23	#NAME?	PREDICTED: probable pectinesterase/pectinesterase inhibitor 7 [Malus domestica]
gene27253	1.57073e-17	-2.41234	Aspartic proteinase, putative isoform 1 [Theobroma cacao]
gene7878	4.40421e-20	-2.79332	Uncharacterized protein TCM_026440 [Theobroma cacao]
gene27769	9.98867e-102	-2.54711	Rab gtpase c2a, alpha,atrab,atrab18b,atrabc2a,rabc2a isoform 1 [Theobroma cacao]
gene31136	8.81098e-06	2.54237	hypothetical protein PRUPE_ppa023071mg [Prunus persica]
gene38535	2.61736e-109	-4.10273	Major facilitator superfamily protein [Theobroma cacao]
gene38539	3.8493e-08	2.59193	PREDICTED: probable 1-deoxy-D-xylulose-5-phosphate synthase, chloroplastic-like isoform X1 [Citrus sinensis]
gene24820	1.54611e-26	#NAME?	Nuclease PA3 [Morus notabilis]
Walnut_newGene_348	3.41727e-06	-2.91842	Protein ROS1, putative [Ricinus communis]
gene33202	7.37901e-54	2.97867	hypothetical protein PRUPE_ppa012351mg [Prunus persica]
gene24015	7.17418e-71	5.26558	hypothetical protein CICLE_v10016325mg [Citrus clementina]
gene3642	2.8269e-88	-2.13261	hypothetical protein CICLE_v10010292mg [Citrus clementina]
gene22998	3.306e-47	-2.93046	PREDICTED: dirigent protein 22-like [Pyrus x bretschneideri]
gene37675	6.25644e-15	2.83858	Anthranilate N-benzoyltransferase protein, putative [Theobroma cacao]
[truncated: 1,040 more rows]
