# Supplementary material for: Comparative Transcriptome Analysis of Genes Involved in Anthocyanin Biosynthesis in Red and Green Walnut (Juglans regia L.)
Source: Molecules. 2017 Dec 22;23(1):25. doi: 10.3390/molecules23010025 (PMC5943948; doi:10.3390/molecules23010025)
Supplement: Supplementary file 1 [file molecules-23-00025-s001.zip › S4 Table. Summary of the GO enrichment analysis of the DEGs in each comparison..xls]

## Sheet: RYvsNY
The DEGs of RYvsNY Significantly enriched in GO terms
GO.ID	Term	Annotated	Significant	Expected	KS
GO:0007018	microtubule-based movement	76	25	10.01	4.9e-06
GO:0007169	transmembrane receptor protein tyrosine kinase signaling pathway	79	31	10.4	9e-06
GO:0045492	xylan biosynthetic process	91	32	11.98	9.2e-05
GO:0043086	negative regulation of catalytic activity	167	49	21.99	0.00011
GO:0010413	glucuronoxylan metabolic process	93	32	12.25	0.00014
GO:0009962	regulation of flavonoid biosynthetic process	28	7	3.69	0.00038
GO:0010075	regulation of meristem growth	103	30	13.56	0.00054
GO:0043481	anthocyanin accumulation in tissues in response to UV light	46	19	6.06	0.00054
GO:0055114	oxidation-reduction process	2608	432	343.47	0.0006
GO:0071555	cell wall organization	344	80	45.3	0.00071
GO:0009650	UV protection	6	5	0.79	0.00098
GO:0046274	lignin catabolic process	46	18	6.06	0.00129
GO:0009718	anthocyanin-containing compound biosynthetic process	23	10	3.03	0.00198
GO:0006855	drug transmembrane transport	80	12	10.54	0.00236
GO:0006468	protein phosphorylation	1332	234	175.42	0.00239
GO:0006535	cysteine biosynthetic process from serine	19	3	2.5	0.00262
GO:0006290	pyrimidine dimer repair	8	1	1.05	0.0032
GO:0009698	phenylpropanoid metabolic process	150	48	19.75	0.00424
GO:0019755	one-carbon compound transport	10	6	1.32	0.00479
GO:0008361	regulation of cell size	40	14	5.27	0.00483
GO:0009834	plant-type secondary cell wall biogenesis	54	19	7.11	0.00505
GO:0060918	auxin transport	81	23	10.67	0.00548
GO:0010025	wax biosynthetic process	18	8	2.37	0.00573
GO:0045488	pectin metabolic process	79	23	10.4	0.006
GO:0009089	lysine biosynthetic process via diaminopimelate	25	3	3.29	0.00651
GO:0030243	cellulose metabolic process	131	30	17.25	0.00679
GO:0019419	sulfate reduction	6	1	0.79	0.00702
GO:0006890	retrograde vesicle-mediated transport, Golgi to ER	11	3	1.45	0.00791
GO:0009825	multidimensional cell growth	71	22	9.35	0.00869
GO:0010213	non-photoreactive DNA repair	6	0	0.79	0.00908
GO:0006294	nucleotide-excision repair, preincision complex assembly	6	0	0.79	0.00908
GO:0010417	glucuronoxylan biosynthetic process	16	8	2.11	0.01177
GO:0016998	cell wall macromolecule catabolic process	41	9	5.4	0.0118
GO:0072599	establishment of protein localization to endoplasmic reticulum	22	2	2.9	0.01226
GO:0045047	protein targeting to ER	22	2	2.9	0.01226
GO:0044036	cell wall macromolecule metabolic process	220	57	28.97	0.01237
GO:0010082	regulation of root meristem growth	7	2	0.92	0.01321
GO:0009699	phenylpropanoid biosynthetic process	84	22	11.06	0.01351
GO:0045490	pectin catabolic process	49	14	6.45	0.01446
GO:0071918	urea transmembrane transport	9	5	1.19	0.0149
GO:0015840	urea transport	9	5	1.19	0.0149
GO:0031668	cellular response to extracellular stimulus	116	18	15.28	0.01502
GO:0071496	cellular response to external stimulus	116	18	15.28	0.01502
GO:0006613	cotranslational protein targeting to membrane	18	2	2.37	0.01502
GO:0006614	SRP-dependent cotranslational protein targeting to membrane	18	2	2.37	0.01502
GO:0006421	asparaginyl-tRNA aminoacylation	7	1	0.92	0.01623
GO:0009991	response to extracellular stimulus	119	18	15.67	0.01686
GO:0030244	cellulose biosynthetic process	102	22	13.43	0.0171
GO:0009963	positive regulation of flavonoid biosynthetic process	18	4	2.37	0.01756
GO:0048449	floral organ formation	91	11	11.98	0.01788
GO:0018202	peptidyl-histidine modification	14	1	1.84	0.01808
GO:0051645	Golgi localization	15	3	1.98	0.01885
GO:0060151	peroxisome localization	15	3	1.98	0.01885
GO:0006865	amino acid transport	179	39	23.57	0.02013
GO:0072507	divalent inorganic cation homeostasis	25	5	3.29	0.02088
GO:0009926	auxin polar transport	72	20	9.48	0.02101
GO:0019742	pentacyclic triterpenoid metabolic process	30	11	3.95	0.02107
GO:0019745	pentacyclic triterpenoid biosynthetic process	30	11	3.95	0.02107
GO:0042559	pteridine-containing compound biosynthetic process	39	1	5.14	0.02343
GO:0070972	protein localization to endoplasmic reticulum	33	2	4.35	0.02556
GO:0031540	regulation of anthocyanin biosynthetic process	7	3	0.92	0.02577
GO:0015749	monosaccharide transport	10	2	1.32	0.02611
GO:0016570	histone modification	255	24	33.58	0.02637
GO:0042402	cellular biogenic amine catabolic process	51	16	6.72	0.02671
GO:0009310	amine catabolic process	51	16	6.72	0.02671
GO:0006722	triterpenoid metabolic process	32	11	4.21	0.02673
GO:0016104	triterpenoid biosynthetic process	32	11	4.21	0.02673
GO:0006833	water transport	73	18	9.61	0.02849
GO:0042044	fluid transport	73	18	9.61	0.02849
GO:0072503	cellular divalent inorganic cation homeostasis	24	5	3.16	0.02907
GO:0009932	cell tip growth	105	26	13.83	0.02946
GO:0007167	enzyme linked receptor protein signaling pathway	81	33	10.67	0.02952
GO:1901419	regulation of response to alcohol	26	2	3.42	0.02994
GO:0006598	polyamine catabolic process	16	6	2.11	0.03038
GO:0006820	anion transport	451	82	59.4	0.031
GO:0016122	xanthophyll metabolic process	9	2	1.19	0.03184
GO:0046942	carboxylic acid transport	218	44	28.71	0.03211
GO:0015849	organic acid transport	218	44	28.71	0.03211
GO:0015669	gas transport	7	1	0.92	0.03246
GO:0080158	chloroplast ribulose bisphosphate carboxylase complex biogenesis	7	0	0.92	0.03277
GO:0016101	diterpenoid metabolic process	43	5	5.66	0.03281
GO:0046856	phosphatidylinositol dephosphorylation	12	5	1.58	0.03296
GO:0046839	phospholipid dephosphorylation	12	5	1.58	0.03296
GO:0071554	cell wall organization or biogenesis	608	142	80.07	0.03334
GO:0051501	diterpene phytoalexin metabolic process	11	3	1.45	0.03565
GO:0051502	diterpene phytoalexin biosynthetic process	11	3	1.45	0.03565
GO:0051504	diterpene phytoalexin precursor biosynthetic process pathway	11	3	1.45	0.03565
GO:0016048	detection of temperature stimulus	8	3	1.05	0.03577
GO:0009411	response to UV	124	35	16.33	0.03628
GO:0070588	calcium ion transmembrane transport	28	3	3.69	0.03634
GO:0009787	regulation of abscisic acid-activated signaling pathway	25	2	3.29	0.0386
GO:0010143	cutin biosynthetic process	8	4	1.05	0.03878
GO:0051646	mitochondrion localization	16	3	2.11	0.03933
GO:0042558	pteridine-containing compound metabolic process	58	3	7.64	0.03966
GO:0010449	root meristem growth	8	2	1.05	0.03986
GO:0006325	chromatin organization	392	43	51.63	0.0434
GO:0009423	chorismate biosynthetic process	10	1	1.32	0.04391
GO:0009267	cellular response to starvation	94	17	12.38	0.04513
GO:0048767	root hair elongation	104	25	13.7	0.0454
GO:0009396	folic acid-containing compound biosynthetic process	35	0	4.61	0.04566
GO:0033587	shikimate biosynthetic process	10	2	1.32	0.04579
GO:0016569	covalent chromatin modification	277	25	36.48	0.04748
GO:0019365	pyridine nucleotide salvage	10	2	1.32	0.0476
GO:0016310	phosphorylation	1935	319	254.83	0.04784
GO:0080147	root hair cell development	107	25	14.09	0.04796
GO:0006284	base-excision repair	21	4	2.77	0.04808
GO:0048364	root development	312	56	41.09	0.04853
GO:0022622	root system development	312	56	41.09	0.04853
GO:0006874	cellular calcium ion homeostasis	12	5	1.58	0.04877
GO:0055074	calcium ion homeostasis	12	5	1.58	0.04877
GO:0031537	regulation of anthocyanin metabolic process	18	3	2.37	0.0492
GO:0010394	homogalacturonan metabolic process	6	1	0.79	0.04967
GO:0010289	homogalacturonan biosynthetic process	6	1	0.79	0.04967
GO:0052546	cell wall pectin metabolic process	26	7	3.42	0.04999
GO:0031669	cellular response to nutrient levels	97	17	12.77	0.05014
GO:0048453	sepal formation	19	1	2.5	0.05025
GO:0048447	sepal morphogenesis	19	1	2.5	0.05025
GO:0048653	anther development	41	13	5.4	0.0512
GO:0015671	oxygen transport	6	0	0.79	0.05298
GO:0001906	cell killing	16	6	2.11	0.05375
GO:0031640	killing of cells of other organism	16	6	2.11	0.05375
GO:0044364	disruption of cells of other organism	16	6	2.11	0.05375
GO:0048645	organ formation	117	17	15.41	0.0539
GO:0010158	abaxial cell fate specification	6	2	0.79	0.0545
GO:0015711	organic anion transport	257	48	33.85	0.05494
GO:0010015	root morphogenesis	224	44	29.5	0.05508
GO:0048464	flower calyx development	23	2	3.03	0.05524
GO:0048442	sepal development	23	2	3.03	0.05524
GO:0042594	response to starvation	95	17	12.51	0.0553
GO:0044255	cellular lipid metabolic process	1106	144	145.66	0.05606
GO:0034308	primary alcohol metabolic process	10	1	1.32	0.05635
GO:0015865	purine nucleotide transport	17	3	2.24	0.05715
GO:1901700	response to oxygen-containing compound	1140	162	150.14	0.05883
GO:0010089	xylem development	49	10	6.45	0.05891
GO:0030259	lipid glycosylation	16	3	2.11	0.05895
GO:0010731	protein glutathionylation	6	3	0.79	0.06014
GO:0046685	response to arsenic-containing substance	18	3	2.37	0.06042
GO:0031667	response to nutrient levels	98	17	12.91	0.06098
GO:0052314	phytoalexin metabolic process	13	3	1.71	0.06272
GO:0052315	phytoalexin biosynthetic process	13	3	1.71	0.06272
GO:0046786	viral replication complex formation and maintenance	10	2	1.32	0.06297
GO:0019079	viral genome replication	10	2	1.32	0.06297
GO:0051274	beta-glucan biosynthetic process	119	24	15.67	0.06378
GO:0009809	lignin biosynthetic process	24	7	3.16	0.06482
GO:0040020	regulation of meiosis	7	1	0.92	0.06582
GO:1901421	positive regulation of response to alcohol	12	2	1.58	0.06631
GO:0042537	benzene-containing compound metabolic process	98	9	12.91	0.06725
GO:0042335	cuticle development	38	11	5	0.06793
GO:0006760	folic acid-containing compound metabolic process	54	2	7.11	0.0683
GO:0009789	positive regulation of abscisic acid-activated signaling pathway	11	2	1.45	0.06873
GO:0008356	asymmetric cell division	25	9	3.29	0.06903
GO:0009832	plant-type cell wall biogenesis	141	40	18.57	0.06927
GO:0009664	plant-type cell wall organization	168	36	22.13	0.06935
GO:0046488	phosphatidylinositol metabolic process	123	14	16.2	0.06936
GO:0017148	negative regulation of translation	10	0	1.32	0.06994
GO:0009704	de-etiolation	6	3	0.79	0.07222
GO:0006629	lipid metabolic process	1425	217	187.67	0.07274
GO:0006084	acetyl-CoA metabolic process	63	11	8.3	0.07382
GO:0048527	lateral root development	44	12	5.79	0.07412
GO:0048528	post-embryonic root development	44	12	5.79	0.07412
GO:0051503	adenine nucleotide transport	10	0	1.32	0.07414
GO:0009560	embryo sac egg cell differentiation	72	0	9.48	0.07434
GO:0007292	female gamete generation	72	0	9.48	0.07434
GO:0006094	gluconeogenesis	111	12	14.62	0.07486
GO:0046688	response to copper ion	14	2	1.84	0.07527
GO:0072330	monocarboxylic acid biosynthetic process	420	60	55.31	0.07559
GO:0032544	plastid translation	7	1	0.92	0.076
GO:0048444	floral organ morphogenesis	100	11	13.17	0.07693
GO:0048563	post-embryonic organ morphogenesis	100	11	13.17	0.07693
GO:0045493	xylan catabolic process	14	5	1.84	0.07781
GO:0010101	post-embryonic root morphogenesis	20	6	2.63	0.07784
GO:0010102	lateral root morphogenesis	20	6	2.63	0.07784
GO:0010647	positive regulation of cell communication	28	3	3.69	0.07842
GO:0002683	negative regulation of immune system process	6	0	0.79	0.07844
GO:0016036	cellular response to phosphate starvation	53	12	6.98	0.08066
GO:0006749	glutathione metabolic process	18	6	2.37	0.08132
GO:0006875	cellular metal ion homeostasis	50	8	6.58	0.08186
GO:0080167	response to karrikin	85	21	11.19	0.083
GO:0071669	plant-type cell wall organization or biogenesis	263	61	34.64	0.08393
GO:0070828	heterochromatin organization	9	1	1.19	0.08409
GO:0031507	heterochromatin assembly	9	1	1.19	0.08409
GO:0016568	chromatin modification	300	27	39.51	0.08583
GO:0018106	peptidyl-histidine phosphorylation	10	1	1.32	0.08635
GO:0009561	megagametogenesis	100	1	13.17	0.08706
GO:0022403	cell cycle phase	56	2	7.38	0.08709
GO:0010388	cullin deneddylation	56	2	7.38	0.08709
GO:0044848	biological phase	56	2	7.38	0.08709
GO:0000085	mitotic G2 phase	56	2	7.38	0.08709
GO:0051325	interphase	56	2	7.38	0.08709
GO:0051329	mitotic interphase	56	2	7.38	0.08709
GO:0051319	G2 phase	56	2	7.38	0.08709
GO:0000338	protein deneddylation	56	2	7.38	0.08709
GO:0048284	organelle fusion	36	1	4.74	0.08737
GO:0015824	proline transport	37	10	4.87	0.08807
GO:0006730	one-carbon metabolic process	53	4	6.98	0.08858
GO:0016102	diterpenoid biosynthetic process	29	4	3.82	0.08868
GO:0042214	terpene metabolic process	54	7	7.11	0.09134
GO:0071705	nitrogen compound transport	434	72	57.16	0.09237
GO:0009247	glycolipid biosynthetic process	70	9	9.22	0.09285
GO:0009696	salicylic acid metabolic process	63	7	8.3	0.09324
GO:0048764	trichoblast maturation	152	33	20.02	0.09365
GO:0048765	root hair cell differentiation	152	33	20.02	0.09365
GO:0006817	phosphate ion transport	36	10	4.74	0.09367
GO:0055065	metal ion homeostasis	63	8	8.3	0.09515
GO:0010114	response to red light	79	15	10.4	0.09663
GO:0035265	organ growth	12	2	1.58	0.09697
GO:0009719	response to endogenous stimulus	882	140	116.16	0.09845
GO:0009751	response to salicylic acid	144	15	18.96	0.09887
GO:0048469	cell maturation	153	33	20.15	0.0995
GO:0051726	regulation of cell cycle	213	27	28.05	0.09958
GO:0042439	ethanolamine-containing compound metabolic process	20	5	2.63	0.09991
GO:0022412	cellular process involved in reproduction in multicellular organism	79	2	10.4	0.10048
GO:0010218	response to far red light	76	12	10.01	0.10058
GO:0009074	aromatic amino acid family catabolic process	51	10	6.72	0.10185
GO:0009804	coumarin metabolic process	19	6	2.5	0.10285
GO:0009805	coumarin biosynthetic process	19	6	2.5	0.10285
GO:0043101	purine-containing compound salvage	7	2	0.92	0.10317
GO:0043462	regulation of ATPase activity	9	1	1.19	0.10349
GO:1903289	regulation of ATP catabolic process	9	1	1.19	0.10349
GO:0010315	auxin efflux	12	4	1.58	0.10423
GO:0046246	terpene biosynthetic process	52	6	6.85	0.10431
GO:0006949	syncytium formation	22	6	2.9	0.10494
GO:0019725	cellular homeostasis	247	30	32.53	0.10529
GO:0048569	post-embryonic organ development	327	55	43.07	0.10536
GO:0006633	fatty acid biosynthetic process	233	37	30.69	0.10683
GO:0000079	regulation of cyclin-dependent protein serine/threonine kinase activity	54	11	7.11	0.10755
GO:0019319	hexose biosynthetic process	113	12	14.88	0.10786
GO:0071941	nitrogen cycle metabolic process	20	4	2.63	0.10899
GO:0046460	neutral lipid biosynthetic process	10	1	1.32	0.1095
GO:0046463	acylglycerol biosynthetic process	10	1	1.32	0.1095
GO:0019432	triglyceride biosynthetic process	10	1	1.32	0.1095
GO:0046482	para-aminobenzoic acid metabolic process	22	2	2.9	0.10957
GO:0009697	salicylic acid biosynthetic process	61	7	8.03	0.10964
GO:0019632	shikimate metabolic process	19	3	2.5	0.11009
GO:0009813	flavonoid biosynthetic process	101	29	13.3	0.11061
GO:0045489	pectin biosynthetic process	13	4	1.71	0.11094
GO:0000741	karyogamy	35	1	4.61	0.11201
GO:0007276	gamete generation	90	3	11.85	0.11239
GO:0044283	small molecule biosynthetic process	1091	145	143.68	0.11269
GO:0031425	chloroplast RNA processing	7	0	0.92	0.11278
GO:0009725	response to hormone	817	134	107.6	0.11291
GO:0043650	dicarboxylic acid biosynthetic process	22	2	2.9	0.11296
GO:0000038	very long-chain fatty acid metabolic process	40	10	5.27	0.11354
GO:0043455	regulation of secondary metabolic process	10	2	1.32	0.11418
GO:0006664	glycolipid metabolic process	84	10	11.06	0.11423
GO:0006323	DNA packaging	89	14	11.72	0.11548
GO:0044550	secondary metabolite biosynthetic process	185	37	24.36	0.11602
GO:2000280	regulation of root development	16	3	2.11	0.11616
GO:0010383	cell wall polysaccharide metabolic process	157	47	20.68	0.11637
GO:0048466	androecium development	83	20	10.93	0.11647
GO:0048443	stamen development	83	20	10.93	0.11647
GO:0009685	gibberellin metabolic process	36	2	4.74	0.11655
GO:0046364	monosaccharide biosynthetic process	125	13	16.46	0.11749
GO:0048588	developmental cell growth	167	34	21.99	0.11762
GO:0015850	organic hydroxy compound transport	10	2	1.32	0.11797
GO:0031497	chromatin assembly	74	12	9.75	0.11883
GO:0051262	protein tetramerization	9	1	1.19	0.12046
GO:0010224	response to UV-B	51	7	6.72	0.12087
GO:0051552	flavone metabolic process	33	10	4.35	0.12265
GO:0051553	flavone biosynthetic process	33	10	4.35	0.12265
GO:0051554	flavonol metabolic process	33	10	4.35	0.12265
GO:0051555	flavonol biosynthetic process	33	10	4.35	0.12265
GO:0080036	regulation of cytokinin-activated signaling pathway	6	3	0.79	0.12289
GO:0009269	response to desiccation	36	10	4.74	0.12465
GO:0015804	neutral amino acid transport	40	10	5.27	0.12598
GO:0010087	phloem or xylem histogenesis	73	10	9.61	0.12599
GO:0019058	viral life cycle	14	3	1.84	0.12631
GO:0018298	protein-chromophore linkage	9	2	1.19	0.12663
GO:0046900	tetrahydrofolylpolyglutamate metabolic process	8	0	1.05	0.1277
GO:0046901	tetrahydrofolylpolyglutamate biosynthetic process	8	0	1.05	0.1277
GO:0046417	chorismate metabolic process	21	2	2.77	0.1281
GO:0051567	histone H3-K9 methylation	79	10	10.4	0.1284
GO:0007163	establishment or maintenance of cell polarity	6	1	0.79	0.12856
GO:0009808	lignin metabolic process	76	27	10.01	0.12913
GO:0009169	purine ribonucleoside monophosphate catabolic process	286	50	37.67	0.13011
GO:0009158	ribonucleoside monophosphate catabolic process	286	50	37.67	0.13011
GO:0009125	nucleoside monophosphate catabolic process	286	50	37.67	0.13011
GO:0009128	purine nucleoside monophosphate catabolic process	286	50	37.67	0.13011
GO:0006200	ATP catabolic process	286	50	37.67	0.13011
GO:0014070	response to organic cyclic compound	326	42	42.93	0.13022
GO:0000272	polysaccharide catabolic process	120	26	15.8	0.1343
GO:0023056	positive regulation of signaling	25	2	3.29	0.13446
GO:0009967	positive regulation of signal transduction	25	2	3.29	0.13446
GO:0010410	hemicellulose metabolic process	137	44	18.04	0.13455
GO:0009610	response to symbiotic fungus	13	1	1.71	0.1347
GO:0009228	thiamine biosynthetic process	11	2	1.45	0.13545
GO:0042724	thiamine-containing compound biosynthetic process	11	2	1.45	0.13545
GO:0006952	defense response	774	121	101.93	0.13685
GO:0008610	lipid biosynthetic process	886	122	116.68	0.13693
GO:0016051	carbohydrate biosynthetic process	626	109	82.44	0.13827
GO:0009736	cytokinin-activated signaling pathway	27	8	3.56	0.13905
GO:0071368	cellular response to cytokinin stimulus	27	8	3.56	0.13905
GO:0010358	leaf shaping	6	1	0.79	0.13968
GO:0010338	leaf formation	6	1	0.79	0.13968
GO:0035235	ionotropic glutamate receptor signaling pathway	19	5	2.5	0.13973
GO:0007215	glutamate receptor signaling pathway	19	5	2.5	0.13973
GO:0021700	developmental maturation	177	36	23.31	0.13988
GO:0042886	amide transport	70	15	9.22	0.14035
GO:0010229	inflorescence development	34	6	4.48	0.14074
GO:0009611	response to wounding	162	30	21.33	0.14126
GO:0009627	systemic acquired resistance	142	18	18.7	0.1422
GO:0051604	protein maturation	69	7	9.09	0.1435
GO:0042493	response to drug	81	13	10.67	0.14384
GO:0006661	phosphatidylinositol biosynthetic process	75	5	9.88	0.14662
GO:0009608	response to symbiont	14	1	1.84	0.14672
GO:0046394	carboxylic acid biosynthetic process	888	117	116.95	0.14695
GO:0016053	organic acid biosynthetic process	888	117	116.95	0.14695
GO:0006518	peptide metabolic process	38	10	5	0.14819
GO:0046379	extracellular polysaccharide metabolic process	10	2	1.32	0.1495
GO:0045226	extracellular polysaccharide biosynthetic process	10	2	1.32	0.1495
GO:0006772	thiamine metabolic process	12	2	1.58	0.15296
GO:0042723	thiamine-containing compound metabolic process	12	2	1.58	0.15296
GO:0035383	thioester metabolic process	72	11	9.48	0.15375
GO:0006637	acyl-CoA metabolic process	72	11	9.48	0.15375
GO:0010054	trichoblast differentiation	161	33	21.2	0.15498
GO:0006505	GPI anchor metabolic process	25	1	3.29	0.1552
GO:0008645	hexose transport	6	0	0.79	0.1559
GO:0006775	fat-soluble vitamin metabolic process	15	5	1.98	0.16038
GO:0042362	fat-soluble vitamin biosynthetic process	15	5	1.98	0.16038
GO:0055071	manganese ion homeostasis	6	0	0.79	0.16048
GO:0009741	response to brassinosteroid	68	13	8.96	0.16182
GO:0008033	tRNA processing	72	4	9.48	0.16204
GO:0009607	response to biotic stimulus	743	121	97.85	0.16213
GO:0042631	cellular response to water deprivation	27	4	3.56	0.16283
GO:0071462	cellular response to water stimulus	27	4	3.56	0.16283
GO:0070592	cell wall polysaccharide biosynthetic process	101	34	13.3	0.16396
GO:0052325	cell wall pectin biosynthetic process	10	2	1.32	0.16491
GO:0015867	ATP transport	9	0	1.19	0.16532
GO:0015868	purine ribonucleotide transport	9	0	1.19	0.16532
GO:0046654	tetrahydrofolate biosynthetic process	6	0	0.79	0.16576
GO:0055069	zinc ion homeostasis	14	0	1.84	0.16601
GO:0010345	suberin biosynthetic process	14	5	1.84	0.16736
GO:0006026	aminoglycan catabolic process	29	6	3.82	0.16826
GO:0006030	chitin metabolic process	29	6	3.82	0.16826
GO:0006032	chitin catabolic process	29	6	3.82	0.16826
GO:0046348	amino sugar catabolic process	29	6	3.82	0.16826
GO:1901072	glucosamine-containing compound catabolic process	29	6	3.82	0.16826
GO:0055082	cellular chemical homeostasis	99	13	13.04	0.16868
GO:0006506	GPI anchor biosynthetic process	16	0	2.11	0.16953
GO:0009733	response to auxin	228	44	30.03	0.16976
GO:0043173	nucleotide salvage	19	3	2.5	0.1706
GO:0016572	histone phosphorylation	41	8	5.4	0.17117
GO:0098656	anion transmembrane transport	84	13	11.06	0.17208
GO:0009640	photomorphogenesis	135	8	17.78	0.17279
GO:0034968	histone lysine methylation	121	11	15.94	0.17314
GO:0006099	tricarboxylic acid cycle	51	7	6.72	0.17377
GO:0005975	carbohydrate metabolic process	1820	303	239.69	0.17413
GO:0046271	phenylpropanoid catabolic process	47	19	6.19	0.17621
GO:0044839	cell cycle G2/M phase transition	33	6	4.35	0.17624
GO:0000086	G2/M transition of mitotic cell cycle	33	6	4.35	0.17624
GO:0007186	G-protein coupled receptor signaling pathway	42	6	5.53	0.17642
GO:0009637	response to blue light	76	9	10.01	0.17675
GO:0030003	cellular cation homeostasis	91	12	11.98	0.17682
GO:0009958	positive gravitropism	17	6	2.24	0.17713
GO:0045491	xylan metabolic process	130	42	17.12	0.17773
GO:0016116	carotenoid metabolic process	116	15	15.28	0.17784
GO:0016108	tetraterpenoid metabolic process	116	15	15.28	0.17784
GO:0009943	adaxial/abaxial axis specification	41	9	5.4	0.17814
GO:0009408	response to heat	165	25	21.73	0.17829
GO:0010033	response to organic substance	1309	180	172.39	0.18065
GO:0006002	fructose 6-phosphate metabolic process	15	3	1.98	0.1808
GO:0009226	nucleotide-sugar biosynthetic process	19	1	2.5	0.18108
GO:0010564	regulation of cell cycle process	87	8	11.46	0.18109
GO:0043473	pigmentation	47	20	6.19	0.1813
GO:0010185	regulation of cellular defense response	7	0	0.92	0.18157
GO:0006968	cellular defense response	7	0	0.92	0.18157
GO:0051248	negative regulation of protein metabolic process	46	3	6.06	0.18205
GO:0000077	DNA damage checkpoint	6	3	0.79	0.18245
GO:0031570	DNA integrity checkpoint	6	3	0.79	0.18245
GO:0016032	viral process	22	3	2.9	0.1825
GO:0006022	aminoglycan metabolic process	31	6	4.08	0.18382
GO:0009584	detection of visible light	8	1	1.05	0.18466
GO:0006569	tryptophan catabolic process	35	10	4.61	0.18554
GO:0046218	indolalkylamine catabolic process	35	10	4.61	0.18554
GO:0009735	response to cytokinin	53	12	6.98	0.18616
GO:0044770	cell cycle phase transition	49	8	6.45	0.19063
GO:0044772	mitotic cell cycle phase transition	49	8	6.45	0.19063
GO:0006333	chromatin assembly or disassembly	96	15	12.64	0.19235
GO:0042221	response to chemical	2047	285	269.58	0.19251
GO:0006122	mitochondrial electron transport, ubiquinol to cytochrome c	10	0	1.32	0.19558
GO:2001057	reactive nitrogen species metabolic process	10	2	1.32	0.19623
GO:0042126	nitrate metabolic process	10	2	1.32	0.19623
GO:0042128	nitrate assimilation	10	2	1.32	0.19623
GO:0071900	regulation of protein serine/threonine kinase activity	72	11	9.48	0.19627
GO:0043255	regulation of carbohydrate biosynthetic process	7	0	0.92	0.19651
GO:0009416	response to light stimulus	683	113	89.95	0.19777
GO:0048729	tissue morphogenesis	10	4	1.32	0.19806
GO:0009826	unidimensional cell growth	211	40	27.79	0.19823
GO:0018904	ether metabolic process	50	5	6.58	0.19897
GO:0006650	glycerophospholipid metabolic process	201	23	26.47	0.19944
GO:0009110	vitamin biosynthetic process	68	8	8.96	0.20085
GO:0010411	xyloglucan metabolic process	9	3	1.19	0.20097
GO:0009595	detection of biotic stimulus	33	5	4.35	0.20114
GO:0043648	dicarboxylic acid metabolic process	114	14	15.01	0.20117
GO:0030488	tRNA methylation	11	1	1.45	0.20125
GO:0006020	inositol metabolic process	18	3	2.37	0.20242
GO:0006882	cellular zinc ion homeostasis	13	0	1.71	0.20276
GO:0010311	lateral root formation	14	4	1.84	0.2039
GO:0006575	cellular modified amino acid metabolic process	105	15	13.83	0.20644
GO:0010337	regulation of salicylic acid metabolic process	8	2	1.05	0.20647
GO:0060560	developmental growth involved in morphogenesis	273	49	35.95	0.20647
GO:0046034	ATP metabolic process	341	54	44.91	0.20831
GO:0010092	specification of organ identity	10	2	1.32	0.20857
GO:0010093	specification of floral organ identity	10	2	1.32	0.20857
GO:0009606	tropism	91	19	11.98	0.20902
GO:0042436	indole-containing compound catabolic process	36	10	4.74	0.21018
GO:0042546	cell wall biogenesis	238	62	31.34	0.21103
GO:0009636	response to toxic substance	17	0	2.24	0.21152
GO:0006354	DNA-templated transcription, elongation	47	1	6.19	0.2128
GO:0015866	ADP transport	7	0	0.92	0.21356
GO:0006662	glycerol ether metabolic process	49	4	6.45	0.214
GO:0009624	response to nematode	50	7	6.58	0.21561
GO:0046168	glycerol-3-phosphate catabolic process	7	2	0.92	0.21784
GO:1902930	regulation of alcohol biosynthetic process	7	0	0.92	0.21899
GO:0042181	ketone biosynthetic process	32	5	4.21	0.21975
GO:0051225	spindle assembly	18	3	2.37	0.22014
GO:0006270	DNA replication initiation	42	7	5.53	0.22072
GO:0019344	cysteine biosynthetic process	138	24	18.17	0.22073
GO:0070589	cellular component macromolecule biosynthetic process	103	34	13.56	0.22132
GO:0044038	cell wall macromolecule biosynthetic process	103	34	13.56	0.22132
GO:0042398	cellular modified amino acid biosynthetic process	61	7	8.03	0.22157
GO:0050896	response to stimulus	4566	673	601.33	0.22178
GO:0009944	polarity specification of adaxial/abaxial axis	40	8	5.27	0.22226
GO:0065001	specification of axis polarity	40	8	5.27	0.22226
GO:0018196	peptidyl-asparagine modification	7	1	0.92	0.22294
GO:0018279	protein N-linked glycosylation via asparagine	7	1	0.92	0.22294
GO:0018344	protein geranylgeranylation	9	0	1.19	0.22298
GO:0006979	response to oxidative stress	423	58	55.71	0.22363
GO:0019722	calcium-mediated signaling	37	6	4.87	0.22396
GO:0009073	aromatic amino acid family biosynthetic process	99	13	13.04	0.22421
GO:0045787	positive regulation of cell cycle	10	0	1.32	0.22567
GO:0010053	root epidermal cell differentiation	169	33	22.26	0.22571
GO:0006950	response to stress	2489	354	327.79	0.22601
GO:0010022	meristem determinacy	9	0	1.19	0.22645
GO:0010582	floral meristem determinacy	9	0	1.19	0.22645
GO:0009862	systemic acquired resistance, salicylic acid mediated signaling pathway	58	5	7.64	0.22688
GO:0030433	ER-associated ubiquitin-dependent protein catabolic process	9	1	1.19	0.22764
GO:0009909	regulation of flower development	198	16	26.08	0.22822
GO:0006576	cellular biogenic amine metabolic process	118	23	15.54	0.22874
GO:0055076	transition metal ion homeostasis	44	3	5.79	0.22949
GO:0001736	establishment of planar polarity	9	3	1.19	0.22962
GO:0001738	morphogenesis of a polarized epithelium	9	3	1.19	0.22962
GO:0002009	morphogenesis of an epithelium	9	3	1.19	0.22962
GO:0007155	cell adhesion	67	14	8.82	0.23029
GO:0022610	biological adhesion	67	14	8.82	0.23029
GO:0000271	polysaccharide biosynthetic process	425	86	55.97	0.23088
GO:0009734	auxin-activated signaling pathway	108	22	14.22	0.23088
GO:0007166	cell surface receptor signaling pathway	134	39	17.65	0.23111
GO:0009620	response to fungus	234	38	30.82	0.23117
GO:0046373	L-arabinose metabolic process	10	3	1.32	0.23503
GO:1901990	regulation of mitotic cell cycle phase transition	42	5	5.53	0.23606
GO:1901987	regulation of cell cycle phase transition	42	5	5.53	0.23606
GO:0010389	regulation of G2/M transition of mitotic cell cycle	31	5	4.08	0.237
GO:1902749	regulation of cell cycle G2/M phase transition	31	5	4.08	0.237
GO:0016115	terpenoid catabolic process	13	2	1.71	0.23725
GO:0008300	isoprenoid catabolic process	13	2	1.71	0.23725
GO:0071365	cellular response to auxin stimulus	109	22	14.36	0.23765
GO:0019953	sexual reproduction	108	7	14.22	0.23786
GO:0016571	histone methylation	153	12	20.15	0.23797
GO:0005976	polysaccharide metabolic process	627	136	82.57	0.23809
GO:0010817	regulation of hormone levels	242	54	31.87	0.2394
GO:0009877	nodulation	9	2	1.19	0.23998
GO:0010065	primary meristem tissue development	8	2	1.05	0.2403
GO:0009686	gibberellin biosynthetic process	23	1	3.03	0.24115
GO:0051258	protein polymerization	157	30	20.68	0.24203
GO:0009753	response to jasmonic acid	161	22	21.2	0.24214
GO:0006102	isocitrate metabolic process	10	2	1.32	0.24403
GO:0006534	cysteine metabolic process	142	24	18.7	0.24474
GO:0019932	second-messenger-mediated signaling	41	6	5.4	0.24486
GO:0010235	guard mother cell cytokinesis	7	0	0.92	0.24552
GO:0050776	regulation of immune response	160	16	21.07	0.24574
GO:0006479	protein methylation	174	13	22.92	0.24608
GO:0008213	protein alkylation	174	13	22.92	0.24608
GO:0009165	nucleotide biosynthetic process	288	17	37.93	0.24847
GO:0009851	auxin biosynthetic process	54	10	7.11	0.24891
GO:0071103	DNA conformation change	124	18	16.33	0.24912
GO:0046916	cellular transition metal ion homeostasis	32	3	4.21	0.24912
GO:0072350	tricarboxylic acid metabolic process	14	2	1.84	0.24935
GO:0045454	cell redox homeostasis	139	16	18.31	0.24942
GO:0071824	protein-DNA complex subunit organization	76	12	10.01	0.24948
GO:0065004	protein-DNA complex assembly	76	12	10.01	0.24948
GO:0032508	DNA duplex unwinding	22	3	2.9	0.2497
GO:0032392	DNA geometric change	22	3	2.9	0.2497
GO:0009814	defense response, incompatible interaction	197	25	25.94	0.25004
GO:0006305	DNA alkylation	88	11	11.59	0.25004
GO:0006306	DNA methylation	88	11	11.59	0.25004
GO:0009167	purine ribonucleoside monophosphate metabolic process	365	54	48.07	0.25144
GO:0009126	purine nucleoside monophosphate metabolic process	365	54	48.07	0.25144
GO:0052646	alditol phosphate metabolic process	13	2	1.71	0.25287
GO:0034728	nucleosome organization	67	11	8.82	0.25385
GO:0006334	nucleosome assembly	67	11	8.82	0.25385
GO:0010253	UDP-rhamnose biosynthetic process	9	1	1.19	0.25657
GO:0033478	UDP-rhamnose metabolic process	9	1	1.19	0.25657
GO:0006721	terpenoid metabolic process	241	38	31.74	0.2571
GO:0006631	fatty acid metabolic process	422	55	55.58	0.2574
GO:0006873	cellular ion homeostasis	96	13	12.64	0.25769
GO:0006857	oligopeptide transport	61	10	8.03	0.25778
GO:0015833	peptide transport	61	10	8.03	0.25778
GO:0046486	glycerolipid metabolic process	216	24	28.45	0.25904
GO:0002229	defense response to oomycetes	6	1	0.79	0.25907
GO:0045088	regulation of innate immune response	158	16	20.81	0.26023
GO:0046470	phosphatidylcholine metabolic process	17	5	2.24	0.26181
GO:0031048	chromatin silencing by small RNA	41	3	5.4	0.26241
GO:0043288	apocarotenoid metabolic process	16	3	2.11	0.26268
GO:0009687	abscisic acid metabolic process	16	3	2.11	0.26268
GO:1902644	tertiary alcohol metabolic process	16	3	2.11	0.26268
GO:0006568	tryptophan metabolic process	56	11	7.38	0.26277
GO:0006586	indolalkylamine metabolic process	56	11	7.38	0.26277
GO:0048589	developmental growth	395	79	52.02	0.26396
GO:1901071	glucosamine-containing compound metabolic process	32	6	4.21	0.26422
GO:0000075	cell cycle checkpoint	13	3	1.71	0.26696
GO:0031348	negative regulation of defense response	87	8	11.46	0.26854
GO:0071310	cellular response to organic substance	573	68	75.46	0.26961
GO:0010115	regulation of abscisic acid biosynthetic process	6	0	0.79	0.27207
GO:0009404	toxin metabolic process	106	18	13.96	0.27566
GO:0048829	root cap development	17	5	2.24	0.27655
GO:0046467	membrane lipid biosynthetic process	90	11	11.85	0.27895
GO:0009152	purine ribonucleotide biosynthetic process	85	5	11.19	0.27938
GO:0048359	mucilage metabolic process involved in seed coat development	8	3	1.05	0.27966
GO:0006040	amino sugar metabolic process	34	6	4.48	0.27981
GO:0009639	response to red or far red light	256	28	33.71	0.28004
GO:0000910	cytokinesis	268	57	35.29	0.28162
GO:0007389	pattern specification process	231	39	30.42	0.28235
GO:0045901	positive regulation of translational elongation	9	0	1.19	0.28235
GO:0045905	positive regulation of translational termination	9	0	1.19	0.28235
GO:0006452	translational frameshifting	9	0	1.19	0.28235
GO:0006449	regulation of translational termination	9	0	1.19	0.28235
GO:0006970	response to osmotic stress	518	82	68.22	0.28244
GO:0009691	cytokinin biosynthetic process	10	1	1.32	0.28245
GO:0090487	secondary metabolite catabolic process	93	15	12.25	0.2828
GO:0009407	toxin catabolic process	93	15	12.25	0.2828
GO:0002682	regulation of immune system process	164	16	21.6	0.28404
GO:0006367	transcription initiation from RNA polymerase II promoter	18	0	2.37	0.28503
GO:0006109	regulation of carbohydrate metabolic process	11	0	1.45	0.28655
GO:0017006	protein-tetrapyrrole linkage	10	1	1.32	0.28672
GO:0010067	procambium histogenesis	7	1	0.92	0.2872
GO:0043562	cellular response to nitrogen levels	7	2	0.92	0.28854
GO:0006995	cellular response to nitrogen starvation	7	2	0.92	0.28854
GO:0015819	lysine transport	6	0	0.79	0.2914
GO:0015936	coenzyme A metabolic process	11	3	1.45	0.2918
GO:0006984	ER-nucleus signaling pathway	71	8	9.35	0.29224
GO:0044728	DNA methylation or demethylation	89	11	11.72	0.2935
GO:0006304	DNA modification	89	11	11.72	0.2935
GO:0016579	protein deubiquitination	29	1	3.82	0.2955
GO:0030258	lipid modification	206	24	27.13	0.29585
GO:0016103	diterpenoid catabolic process	11	1	1.45	0.29607
GO:0045487	gibberellin catabolic process	11	1	1.45	0.29607
GO:0045216	cell-cell junction organization	6	0	0.79	0.29617
GO:0034330	cell junction organization	6	0	0.79	0.29617
GO:0009955	adaxial/abaxial pattern specification	51	9	6.72	0.29652
GO:0006261	DNA-dependent DNA replication	114	10	15.01	0.29728
GO:0097305	response to alcohol	345	49	45.44	0.29758
GO:0019374	galactolipid metabolic process	49	9	6.45	0.29957
GO:0019375	galactolipid biosynthetic process	49	9	6.45	0.29957
GO:0015695	organic cation transport	6	1	0.79	0.30014
GO:0000097	sulfur amino acid biosynthetic process	215	32	28.31	0.30021
GO:0018131	oxazole or thiazole biosynthetic process	6	2	0.79	0.30044
GO:0052837	thiazole biosynthetic process	6	2	0.79	0.30044
GO:0052838	thiazole metabolic process	6	2	0.79	0.30044
GO:0046484	oxazole or thiazole metabolic process	6	2	0.79	0.30044
GO:0000154	rRNA modification	10	0	1.32	0.30103
GO:0048468	cell development	322	49	42.41	0.30233
GO:0051783	regulation of nuclear division	20	1	2.63	0.30397
GO:0009956	radial pattern formation	9	2	1.19	0.30431
GO:0070887	cellular response to chemical stimulus	669	79	88.11	0.30617
GO:0018958	phenol-containing compound metabolic process	70	9	9.22	0.30727
GO:0031167	rRNA methylation	8	0	1.05	0.3073
GO:0052547	regulation of peptidase activity	11	0	1.45	0.30742
GO:0010466	negative regulation of peptidase activity	11	0	1.45	0.30742
GO:0030162	regulation of proteolysis	11	0	1.45	0.30742
GO:0016117	carotenoid biosynthetic process	111	13	14.62	0.30748
GO:0016109	tetraterpenoid biosynthetic process	111	13	14.62	0.30748
GO:0006558	L-phenylalanine metabolic process	27	3	3.56	0.30904
GO:1902221	erythrose 4-phosphate/phosphoenolpyruvate family amino acid metabolic process	27	3	3.56	0.30904
GO:0009414	response to water deprivation	204	34	26.87	0.31003
GO:0048831	regulation of shoot system development	208	17	27.39	0.31194
GO:0035967	cellular response to topologically incorrect protein	62	5	8.17	0.31198
GO:0034620	cellular response to unfolded protein	62	5	8.17	0.31198
GO:0006986	response to unfolded protein	62	5	8.17	0.31198
GO:0030968	endoplasmic reticulum unfolded protein response	62	5	8.17	0.31198
GO:0032269	negative regulation of cellular protein metabolic process	43	3	5.66	0.31235
GO:0015851	nucleobase transport	15	2	1.98	0.31264
GO:0055081	anion homeostasis	10	3	1.32	0.31326
GO:0042545	cell wall modification	173	32	22.78	0.31351
GO:0016458	gene silencing	198	18	26.08	0.31375
GO:0043289	apocarotenoid biosynthetic process	15	2	1.98	0.31567
GO:0009688	abscisic acid biosynthetic process	15	2	1.98	0.31567
GO:1902645	tertiary alcohol biosynthetic process	15	2	1.98	0.31567
GO:0032784	regulation of DNA-templated transcription, elongation	10	0	1.32	0.31599
GO:0009451	RNA modification	240	10	31.61	0.31608
GO:0031047	gene silencing by RNA	148	12	19.49	0.31757
GO:0000902	cell morphogenesis	330	56	43.46	0.31768
GO:0019310	inositol catabolic process	8	1	1.05	0.31778
GO:1901293	nucleoside phosphate biosynthetic process	291	18	38.32	0.32092
GO:0030154	cell differentiation	555	72	73.09	0.32115
GO:0006559	L-phenylalanine catabolic process	16	0	2.11	0.32378
GO:1902222	erythrose 4-phosphate/phosphoenolpyruvate family amino acid catabolic process	16	0	2.11	0.32378
GO:0043174	nucleoside salvage	8	0	1.05	0.32378
GO:0009308	amine metabolic process	162	30	21.33	0.32406
GO:0009798	axis specification	47	10	6.19	0.32448
GO:0071446	cellular response to salicylic acid stimulus	103	8	13.56	0.32481
GO:0009863	salicylic acid mediated signaling pathway	103	8	13.56	0.32481
GO:0006714	sesquiterpenoid metabolic process	19	3	2.5	0.32706
GO:0009628	response to abiotic stimulus	1673	263	220.33	0.32708
GO:0010928	regulation of auxin mediated signaling pathway	14	4	1.84	0.32709
GO:0034050	host programmed cell death induced by symbiont	157	15	20.68	0.32724
GO:0009095	aromatic amino acid family biosynthetic process, prephenate pathway	16	4	2.11	0.32729
GO:0007164	establishment of tissue polarity	11	3	1.45	0.32736
GO:0009314	response to radiation	718	114	94.56	0.32809
GO:0035434	copper ion transmembrane transport	17	1	2.24	0.32845
GO:0006573	valine metabolic process	7	0	0.92	0.32869
GO:0001101	response to acid chemical	646	94	85.08	0.32915
GO:0007010	cytoskeleton organization	338	45	44.51	0.32957
GO:0065008	regulation of biological quality	775	102	102.07	0.3297
GO:0051241	negative regulation of multicellular organismal process	43	3	5.66	0.32994
GO:0003333	amino acid transmembrane transport	49	8	6.45	0.33032
GO:0006540	glutamate decarboxylation to succinate	8	0	1.05	0.33048
GO:0006538	glutamate catabolic process	8	0	1.05	0.33048
GO:0043200	response to amino acid	6	1	0.79	0.33051
GO:0060003	copper ion export	11	0	1.45	0.3318
GO:0070646	protein modification by small protein removal	86	6	11.33	0.33191
GO:0042761	very long-chain fatty acid biosynthetic process	11	2	1.45	0.33197
GO:0015937	coenzyme A biosynthetic process	6	0	0.79	0.33241
GO:0033866	nucleoside bisphosphate biosynthetic process	6	0	0.79	0.33241
GO:0034030	ribonucleoside bisphosphate biosynthetic process	6	0	0.79	0.33241
GO:0034033	purine nucleoside bisphosphate biosynthetic process	6	0	0.79	0.33241
GO:0009638	phototropism	9	3	1.19	0.33364
GO:0044106	cellular amine metabolic process	126	24	16.59	0.33371
GO:0007051	spindle organization	19	3	2.5	0.33373
GO:0012501	programmed cell death	185	21	24.36	0.33413
GO:0036265	RNA (guanine-N7)-methylation	6	0	0.79	0.33432
GO:0009800	cinnamic acid biosynthetic process	14	0	1.84	0.33476
GO:0009803	cinnamic acid metabolic process	14	0	1.84	0.33476
GO:0016556	mRNA modification	73	7	9.61	0.33491
GO:0016246	RNA interference	80	7	10.54	0.33498
GO:0033865	nucleoside bisphosphate metabolic process	19	4	2.5	0.33573
GO:0034032	purine nucleoside bisphosphate metabolic process	19	4	2.5	0.33573
GO:0033875	ribonucleoside bisphosphate metabolic process	19	4	2.5	0.33573
GO:0046189	phenol-containing compound biosynthetic process	68	9	8.96	0.33825
GO:0006643	membrane lipid metabolic process	122	14	16.07	0.33919
GO:0008272	sulfate transport	26	6	3.42	0.34085
GO:0009812	flavonoid metabolic process	115	29	15.15	0.34108
GO:0043631	RNA polyadenylation	16	1	2.11	0.34145
GO:0010363	regulation of plant-type hypersensitive response	130	13	17.12	0.342
GO:0008655	pyrimidine-containing compound salvage	9	1	1.19	0.34521
GO:0009612	response to mechanical stimulus	27	7	3.56	0.34582
GO:2000241	regulation of reproductive process	222	19	29.24	0.34589
GO:1901661	quinone metabolic process	30	4	3.95	0.34593
GO:1901663	quinone biosynthetic process	30	4	3.95	0.34593
GO:0010225	response to UV-C	9	2	1.19	0.34631
GO:0048768	root hair cell tip growth	6	0	0.79	0.34682
GO:0009683	indoleacetic acid metabolic process	41	10	5.4	0.34907
GO:0009684	indoleacetic acid biosynthetic process	41	10	5.4	0.34907
GO:0009070	serine family amino acid biosynthetic process	146	24	19.23	0.35004
GO:0044281	small molecule metabolic process	2968	341	390.88	0.35007
GO:0042023	DNA endoreduplication	66	7	8.69	0.35071
GO:0006563	L-serine metabolic process	38	4	5	0.35099
GO:0010191	mucilage metabolic process	9	3	1.19	0.35296
GO:0006612	protein targeting to membrane	158	15	20.81	0.35377
GO:1901136	carbohydrate derivative catabolic process	560	80	73.75	0.35411
GO:0006414	translational elongation	111	3	14.62	0.35422
GO:0048584	positive regulation of response to stimulus	60	4	7.9	0.35422
GO:0035999	tetrahydrofolate interconversion	15	2	1.98	0.35459
GO:0080135	regulation of cellular response to stress	137	16	18.04	0.35469
GO:0051761	sesquiterpene metabolic process	33	3	4.35	0.3555
GO:0051762	sesquiterpene biosynthetic process	33	3	4.35	0.3555
GO:0006863	purine nucleobase transport	14	2	1.84	0.35585
GO:0009738	abscisic acid-activated signaling pathway	85	10	11.19	0.35703
GO:0071229	cellular response to acid chemical	238	25	31.34	0.35878
GO:0072527	pyrimidine-containing compound metabolic process	150	10	19.75	0.35898
GO:0009081	branched-chain amino acid metabolic process	37	2	4.87	0.35959
GO:0015858	nucleoside transport	11	0	1.45	0.36104
GO:0044711	single-organism biosynthetic process	2542	355	334.77	0.36115
GO:0010375	stomatal complex patterning	6	1	0.79	0.36121
GO:0016126	sterol biosynthetic process	86	15	11.33	0.36126
GO:0016144	S-glycoside biosynthetic process	86	12	11.33	0.36242
GO:0019761	glucosinolate biosynthetic process	86	12	11.33	0.36242
GO:0019758	glycosinolate biosynthetic process	86	12	11.33	0.36242
GO:0072529	pyrimidine-containing compound catabolic process	9	1	1.19	0.36304
GO:0051784	negative regulation of nuclear division	9	0	1.19	0.36335
GO:0045144	meiotic sister chromatid segregation	6	1	0.79	0.36335
GO:0051177	meiotic sister chromatid cohesion	6	1	0.79	0.36335
GO:0071214	cellular response to abiotic stimulus	80	9	10.54	0.36391
GO:0043090	amino acid import	49	9	6.45	0.36502
GO:0044699	single-organism process	10578	1455	1393.1	0.36627
GO:0006105	succinate metabolic process	10	0	1.32	0.36787
GO:0048437	floral organ development	289	44	38.06	0.36838
GO:0000469	cleavage involved in rRNA processing	11	2	1.45	0.36851
GO:0000478	endonucleolytic cleavage involved in rRNA processing	11	2	1.45	0.36851
GO:0090501	RNA phosphodiester bond hydrolysis	11	2	1.45	0.36851
GO:0090502	RNA phosphodiester bond hydrolysis, endonucleolytic	11	2	1.45	0.36851
GO:0042430	indole-containing compound metabolic process	73	12	9.61	0.36916
GO:0006207	'de novo' pyrimidine nucleobase biosynthetic process	7	0	0.92	0.36939
GO:0072528	pyrimidine-containing compound biosynthetic process	140	8	18.44	0.37032
GO:0046112	nucleobase biosynthetic process	19	2	2.5	0.37124
GO:0031123	RNA 3'-end processing	22	1	2.9	0.37168
GO:0006641	triglyceride metabolic process	14	1	1.84	0.3733
GO:0006638	neutral lipid metabolic process	14	1	1.84	0.3733
GO:0006639	acylglycerol metabolic process	14	1	1.84	0.3733
GO:0006825	copper ion transport	32	5	4.21	0.37379
GO:0097354	prenylation	13	0	1.71	0.37597
GO:0018342	protein prenylation	13	0	1.71	0.37597
GO:0046283	anthocyanin-containing compound metabolic process	37	10	4.87	0.37842
GO:0098661	inorganic anion transmembrane transport	18	5	2.37	0.3795
GO:0009094	L-phenylalanine biosynthetic process	11	3	1.45	0.38065
GO:1902223	erythrose 4-phosphate/phosphoenolpyruvate family amino acid biosynthetic process	11	3	1.45	0.38065
GO:0048438	floral whorl development	224	36	29.5	0.38127
GO:0009225	nucleotide-sugar metabolic process	27	5	3.56	0.38149
GO:0045786	negative regulation of cell cycle	28	3	3.69	0.38225
GO:0009644	response to high light intensity	107	16	14.09	0.38335
GO:0009072	aromatic amino acid family metabolic process	186	25	24.5	0.38579
GO:0006513	protein monoubiquitination	6	1	0.79	0.38617
GO:0016574	histone ubiquitination	6	1	0.79	0.38617
GO:1990267	response to transition metal nanoparticle	49	7	6.45	0.38646
GO:0016114	terpenoid biosynthetic process	216	34	28.45	0.38667
GO:0009850	auxin metabolic process	68	10	8.96	0.38738
GO:0009129	pyrimidine nucleoside monophosphate metabolic process	24	0	3.16	0.38761
GO:0009130	pyrimidine nucleoside monophosphate biosynthetic process	24	0	3.16	0.38761
GO:0032262	pyrimidine nucleotide salvage	8	1	1.05	0.38853
GO:0010138	pyrimidine ribonucleotide salvage	8	1	1.05	0.38853
GO:0034284	response to monosaccharide	81	10	10.67	0.38934
GO:0009746	response to hexose	81	10	10.67	0.38934
GO:0016925	protein sumoylation	8	0	1.05	0.39075
GO:0044786	cell cycle DNA replication	69	7	9.09	0.39118
GO:0009737	response to abscisic acid	286	37	37.67	0.39127
GO:0009415	response to water	212	34	27.92	0.39141
GO:0000162	tryptophan biosynthetic process	21	3	2.77	0.39336
GO:0046219	indolalkylamine biosynthetic process	21	3	2.77	0.39336
GO:0019566	arabinose metabolic process	11	3	1.45	0.39518
GO:0051302	regulation of cell division	53	5	6.98	0.39699
GO:0006405	RNA export from nucleus	58	2	7.64	0.3979
GO:0051445	regulation of meiotic cell cycle	13	1	1.71	0.39862
GO:0016441	posttranscriptional gene silencing	103	8	13.56	0.39897
GO:0046113	nucleobase catabolic process	7	1	0.92	0.39981
GO:0006208	pyrimidine nucleobase catabolic process	7	1	0.92	0.39981
GO:1901565	organonitrogen compound catabolic process	761	104	100.22	0.39996
GO:0019852	L-ascorbic acid metabolic process	13	1	1.71	0.40016
GO:0019853	L-ascorbic acid biosynthetic process	13	1	1.71	0.40016
GO:0072348	sulfur compound transport	27	6	3.56	0.40106
GO:0006816	calcium ion transport	105	18	13.83	0.40149
GO:0009743	response to carbohydrate	195	21	25.68	0.40152
GO:0006720	isoprenoid metabolic process	438	55	57.68	0.40307
GO:0040029	regulation of gene expression, epigenetic	224	25	29.5	0.40329
GO:0000226	microtubule cytoskeleton organization	145	21	19.1	0.40375
GO:0071215	cellular response to abscisic acid stimulus	89	10	11.72	0.40405
GO:0006465	signal peptide processing	17	4	2.24	0.40515
GO:0042542	response to hydrogen peroxide	145	19	19.1	0.40522
GO:0002238	response to molecule of fungal origin	12	2	1.58	0.40634
GO:0010310	regulation of hydrogen peroxide metabolic process	49	5	6.45	0.4065
GO:0061640	cytoskeleton-dependent cytokinesis	225	50	29.63	0.41144
GO:0045926	negative regulation of growth	19	5	2.5	0.41145
GO:0048585	negative regulation of response to stimulus	132	8	17.38	0.41231
GO:0010286	heat acclimation	34	4	4.48	0.41251
GO:0050832	defense response to fungus	149	24	19.62	0.41291
GO:0048451	petal formation	22	1	2.9	0.41321
GO:0048609	multicellular organismal reproductive process	167	11	21.99	0.41333
GO:0006754	ATP biosynthetic process	52	5	6.85	0.41352
GO:0048646	anatomical structure formation involved in morphogenesis	172	22	22.65	0.4138
GO:0043067	regulation of programmed cell death	147	17	19.36	0.41393
GO:0015800	acidic amino acid transport	11	0	1.45	0.41571
GO:0006012	galactose metabolic process	21	5	2.77	0.41802
GO:0034754	cellular hormone metabolic process	62	13	8.17	0.41806
GO:0009626	plant-type hypersensitive response	149	15	19.62	0.42066
GO:0006694	steroid biosynthetic process	115	21	15.15	0.42073
GO:0006014	D-ribose metabolic process	12	0	1.58	0.42207
GO:0006302	double-strand break repair	67	0	8.82	0.42288
GO:0006879	cellular iron ion homeostasis	12	2	1.58	0.42301
GO:0043243	positive regulation of protein complex disassembly	13	1	1.71	0.42319
GO:0016119	carotene metabolic process	10	1	1.32	0.42324
GO:0043062	extracellular structure organization	16	4	2.11	0.42354
GO:0071668	plant-type cell wall assembly	16	4	2.11	0.42354
GO:0030198	extracellular matrix organization	16	4	2.11	0.42354
GO:0010215	cellulose microfibril organization	16	4	2.11	0.42354
GO:0070726	cell wall assembly	16	4	2.11	0.42354
GO:0019747	regulation of isoprenoid metabolic process	9	0	1.19	0.42466
GO:0015698	inorganic anion transport	188	32	24.76	0.42477
GO:0009052	pentose-phosphate shunt, non-oxidative branch	7	2	0.92	0.42482
GO:0009068	aspartate family amino acid catabolic process	8	1	1.05	0.42607
GO:0010583	response to cyclopentenone	43	6	5.66	0.42657
GO:0019685	photosynthesis, dark reaction	15	1	1.98	0.42664
GO:0019253	reductive pentose-phosphate cycle	15	1	1.98	0.42664
GO:0045682	regulation of epidermis development	13	3	1.71	0.42787
GO:0051606	detection of stimulus	75	11	9.88	0.42788
GO:0044206	UMP salvage	6	0	0.79	0.42927
GO:0043097	pyrimidine nucleoside salvage	6	0	0.79	0.42927
GO:0009605	response to external stimulus	967	153	127.35	0.42963
GO:0006547	histidine metabolic process	16	0	2.11	0.43132
GO:0052803	imidazole-containing compound metabolic process	16	0	2.11	0.43132
GO:0042445	hormone metabolic process	146	23	19.23	0.43288
GO:0042435	indole-containing compound biosynthetic process	59	11	7.77	0.43402
GO:0009913	epidermal cell differentiation	258	41	33.98	0.43574
GO:0030855	epithelial cell differentiation	258	41	33.98	0.43574
GO:0009060	aerobic respiration	83	9	10.93	0.4371
GO:0040011	locomotion	11	0	1.45	0.43754
GO:0009651	response to salt stress	465	72	61.24	0.43759
GO:0006862	nucleotide transport	66	7	8.69	0.43959
GO:0006108	malate metabolic process	25	5	3.29	0.43967
GO:1901420	negative regulation of response to alcohol	11	0	1.45	0.43997
GO:0009788	negative regulation of abscisic acid-activated signaling pathway	11	0	1.45	0.43997
GO:0080024	indolebutyric acid metabolic process	6	0	0.79	0.44259
GO:0030865	cortical cytoskeleton organization	20	3	2.63	0.44338
GO:0009123	nucleoside monophosphate metabolic process	396	55	52.15	0.44492
GO:0009755	hormone-mediated signaling pathway	395	57	52.02	0.44552
GO:0051495	positive regulation of cytoskeleton organization	71	12	9.35	0.44591
GO:0009168	purine ribonucleoside monophosphate biosynthetic process	76	5	10.01	0.44666
GO:0009127	purine nucleoside monophosphate biosynthetic process	76	5	10.01	0.44666
GO:0072488	ammonium transmembrane transport	13	2	1.71	0.44716
GO:0009645	response to low light intensity stimulus	6	1	0.79	0.45005
GO:0032101	regulation of response to external stimulus	19	1	2.5	0.4509
GO:0015074	DNA integration	326	14	42.93	0.45113
GO:0016106	sesquiterpenoid biosynthetic process	17	2	2.24	0.45163
GO:0010043	response to zinc ion	34	5	4.48	0.45197
GO:0008612	peptidyl-lysine modification to peptidyl-hypusine	12	0	1.58	0.45271
GO:0010948	negative regulation of cell cycle process	12	0	1.58	0.45315
GO:0051053	negative regulation of DNA metabolic process	6	0	0.79	0.45329
GO:0006811	ion transport	1121	159	147.63	0.45401
GO:0006406	mRNA export from nucleus	57	2	7.51	0.45536
GO:0006096	glycolytic process	168	18	22.13	0.45563
GO:0010189	vitamin E biosynthetic process	13	3	1.71	0.4568
GO:0042360	vitamin E metabolic process	13	3	1.71	0.4568
GO:0035384	thioester biosynthetic process	18	2	2.37	0.45718
GO:0071616	acyl-CoA biosynthetic process	18	2	2.37	0.45718
GO:0032989	cellular component morphogenesis	352	57	46.36	0.45828
GO:1901617	organic hydroxy compound biosynthetic process	317	50	41.75	0.45871
GO:0070932	histone H3 deacetylation	10	1	1.32	0.45875
GO:0070933	histone H4 deacetylation	10	1	1.32	0.45875
GO:0055072	iron ion homeostasis	20	2	2.63	0.4599
GO:0009450	gamma-aminobutyric acid catabolic process	9	0	1.19	0.46071
GO:0009448	gamma-aminobutyric acid metabolic process	9	0	1.19	0.46071
GO:0010305	leaf vascular tissue pattern formation	11	3	1.45	0.4608
GO:0044703	multi-organism reproductive process	287	31	37.8	0.46127
GO:0006793	phosphorus metabolic process	3401	474	447.9	0.46205
GO:0009630	gravitropism	80	14	10.54	0.46228
GO:0009583	detection of light stimulus	15	1	1.98	0.46301
GO:0000724	double-strand break repair via homologous recombination	45	0	5.93	0.46307
GO:0000725	recombinational repair	45	0	5.93	0.46307
GO:0048658	anther wall tapetum development	6	2	0.79	0.46435
GO:0009581	detection of external stimulus	28	5	3.69	0.46482
GO:0051346	negative regulation of hydrolase activity	12	0	1.58	0.46544
GO:0009161	ribonucleoside monophosphate metabolic process	392	54	51.63	0.46577
GO:0005513	detection of calcium ion	11	1	1.45	0.46588
GO:0006997	nucleus organization	44	1	5.79	0.467
GO:0042364	water-soluble vitamin biosynthetic process	53	3	6.98	0.46747
GO:0006595	polyamine metabolic process	38	7	5	0.46771
GO:0010214	seed coat development	17	4	2.24	0.46895
GO:0097306	cellular response to alcohol	124	14	16.33	0.46928
GO:0048564	photosystem I assembly	6	0	0.79	0.46954
GO:0015696	ammonium transport	48	6	6.32	0.4696
GO:0000917	barrier septum assembly	8	0	1.05	0.47034
GO:0090529	cell septum assembly	8	0	1.05	0.47034
GO:0015977	carbon fixation	22	1	2.9	0.47063
GO:0071396	cellular response to lipid	156	18	20.54	0.47087
GO:0002376	immune system process	400	45	52.68	0.4718
GO:0045337	farnesyl diphosphate biosynthetic process	9	3	1.19	0.47203
GO:0033384	geranyl diphosphate biosynthetic process	9	3	1.19	0.47203
GO:0009313	oligosaccharide catabolic process	9	1	1.19	0.4721
GO:0006206	pyrimidine nucleobase metabolic process	16	1	2.11	0.47248
GO:0031334	positive regulation of protein complex assembly	67	11	8.82	0.47272
GO:0032273	positive regulation of protein polymerization	67	11	8.82	0.47272
GO:0007020	microtubule nucleation	45	8	5.93	0.47544
GO:0042127	regulation of cell proliferation	51	4	6.72	0.4756
GO:0043900	regulation of multi-organism process	61	8	8.03	0.47572
GO:0000819	sister chromatid segregation	14	2	1.84	0.47661
GO:0006520	cellular amino acid metabolic process	846	94	111.42	0.47701
GO:0044242	cellular lipid catabolic process	187	14	24.63	0.47749
GO:0010074	maintenance of meristem identity	38	1	5	0.47846
GO:0008544	epidermis development	373	56	49.12	0.47919
GO:0060429	epithelium development	373	56	49.12	0.47919
GO:0043588	skin development	373	56	49.12	0.47919
GO:0009629	response to gravity	85	15	11.19	0.47935
GO:0009173	pyrimidine ribonucleoside monophosphate metabolic process	22	0	2.9	0.4801
GO:0009174	pyrimidine ribonucleoside monophosphate biosynthetic process	22	0	2.9	0.4801
GO:0046049	UMP metabolic process	22	0	2.9	0.4801
GO:0006222	UMP biosynthetic process	22	0	2.9	0.4801
GO:0042180	cellular ketone metabolic process	61	8	8.03	0.48055
GO:0006298	mismatch repair	14	0	1.84	0.48137
GO:0010497	plasmodesmata-mediated intercellular transport	7	1	0.92	0.48237
GO:0010193	response to ozone	14	2	1.84	0.48242
GO:0009582	detection of abiotic stimulus	24	4	3.16	0.48428
GO:0044030	regulation of DNA methylation	6	1	0.79	0.4849
GO:0033993	response to lipid	391	55	51.49	0.48507
GO:0006570	tyrosine metabolic process	10	1	1.32	0.48532
GO:1901606	alpha-amino acid catabolic process	120	15	15.8	0.48543
GO:0045087	innate immune response	352	37	46.36	0.48624
GO:0051236	establishment of RNA localization	59	2	7.77	0.48767
GO:0050657	nucleic acid transport	59	2	7.77	0.48767
GO:0050658	RNA transport	59	2	7.77	0.48767
GO:0006403	RNA localization	59	2	7.77	0.48767
GO:0015813	L-glutamate transport	9	0	1.19	0.48768
GO:0008284	positive regulation of cell proliferation	33	2	4.35	0.48802
GO:0045736	negative regulation of cyclin-dependent protein serine/threonine kinase activity	18	3	2.37	0.48807
GO:0009593	detection of chemical stimulus	16	1	2.11	0.49044
GO:0046653	tetrahydrofolate metabolic process	32	2	4.21	0.49109
GO:0007093	mitotic cell cycle checkpoint	7	0	0.92	0.49121
GO:0007094	mitotic spindle assembly checkpoint	7	0	0.92	0.49121
GO:0071173	spindle assembly checkpoint	7	0	0.92	0.49121
GO:0071174	mitotic spindle checkpoint	7	0	0.92	0.49121
GO:1901991	negative regulation of mitotic cell cycle phase transition	7	0	0.92	0.49121
GO:1901988	negative regulation of cell cycle phase transition	7	0	0.92	0.49121
GO:1902100	negative regulation of metaphase/anaphase transition of cell cycle	7	0	0.92	0.49121
GO:0031577	spindle checkpoint	7	0	0.92	0.49121
GO:0045841	negative regulation of mitotic metaphase/anaphase transition	7	0	0.92	0.49121
GO:0045839	negative regulation of mitosis	7	0	0.92	0.49121
GO:0016143	S-glycoside metabolic process	96	13	12.64	0.49168
GO:0019760	glucosinolate metabolic process	96	13	12.64	0.49168
GO:0019757	glycosinolate metabolic process	96	13	12.64	0.49168
GO:0000105	histidine biosynthetic process	15	0	1.98	0.49199
GO:0051607	defense response to virus	64	6	8.43	0.49227
GO:0009615	response to virus	79	7	10.4	0.49232
GO:0050665	hydrogen peroxide biosynthetic process	29	5	3.82	0.49274
GO:1903409	reactive oxygen species biosynthetic process	29	5	3.82	0.49274
GO:0010232	vascular transport	13	2	1.71	0.49313
GO:0010233	phloem transport	13	2	1.71	0.49313
GO:0048235	pollen sperm cell differentiation	7	2	0.92	0.49426
GO:0080134	regulation of response to stress	246	25	32.4	0.49432
GO:0019748	secondary metabolic process	379	81	49.91	0.49439
GO:0006419	alanyl-tRNA aminoacylation	31	1	4.08	0.49441
GO:0043410	positive regulation of MAPK cascade	8	0	1.05	0.49539
GO:0043406	positive regulation of MAP kinase activity	8	0	1.05	0.49539
GO:0071902	positive regulation of protein serine/threonine kinase activity	8	0	1.05	0.49539
GO:0000187	activation of MAPK activity	8	0	1.05	0.49539
GO:1902533	positive regulation of intracellular signal transduction	8	0	1.05	0.49539
GO:0006082	organic acid metabolic process	1740	193	229.15	0.49612
GO:0046474	glycerophospholipid biosynthetic process	141	11	18.57	0.4966
GO:0009069	serine family amino acid metabolic process	199	28	26.21	0.49716
GO:0042446	hormone biosynthetic process	119	21	15.67	0.49819
GO:0006418	tRNA aminoacylation for protein translation	103	3	13.56	0.4989
GO:0048354	mucilage biosynthetic process involved in seed coat development	6	2	0.79	0.4995
GO:0001676	long-chain fatty acid metabolic process	17	2	2.24	0.49986
GO:0000959	mitochondrial RNA metabolic process	9	0	1.19	0.50076
GO:1900864	mitochondrial RNA modification	9	0	1.19	0.50076
GO:0000070	mitotic sister chromatid segregation	8	1	1.05	0.50082
GO:0005985	sucrose metabolic process	29	4	3.82	0.50153
GO:0016120	carotene biosynthetic process	8	0	1.05	0.5027
GO:0009886	post-embryonic morphogenesis	236	30	31.08	0.50299
GO:0008202	steroid metabolic process	127	22	16.73	0.50371
GO:0016129	phytosteroid biosynthetic process	56	10	7.38	0.50406
GO:0043436	oxoacid metabolic process	1739	193	229.02	0.50433
GO:0006544	glycine metabolic process	52	5	6.85	0.50637
GO:0031407	oxylipin metabolic process	43	3	5.66	0.50646
GO:0019856	pyrimidine nucleobase biosynthetic process	11	0	1.45	0.50664
GO:0006349	regulation of gene expression by genetic imprinting	7	0	0.92	0.50769
GO:0071514	genetic imprinting	7	0	0.92	0.50769
GO:0006955	immune response	355	37	46.75	0.50899
GO:0043603	cellular amide metabolic process	67	11	8.82	0.51011
GO:0010252	auxin homeostasis	12	1	1.58	0.51018
GO:0006743	ubiquinone metabolic process	19	2	2.5	0.51166
GO:0006744	ubiquinone biosynthetic process	19	2	2.5	0.51166
GO:0009435	NAD biosynthetic process	7	0	0.92	0.51195
GO:0010197	polar nucleus fusion	12	1	1.58	0.51249
GO:0008037	cell recognition	44	8	5.79	0.51263
GO:0048544	recognition of pollen	44	8	5.79	0.51263
GO:0010675	regulation of cellular carbohydrate metabolic process	8	0	1.05	0.51305
GO:0045727	positive regulation of translation	26	1	3.42	0.51511
GO:0048580	regulation of post-embryonic development	249	18	32.79	0.51574
GO:0046130	purine ribonucleoside catabolic process	513	71	67.56	0.51665
GO:0008299	isoprenoid biosynthetic process	413	51	54.39	0.51684
GO:0048509	regulation of meristem development	130	33	17.12	0.51693
GO:0006767	water-soluble vitamin metabolic process	54	3	7.11	0.51792
GO:0010332	response to gamma radiation	34	2	4.48	0.51838
GO:0006892	post-Golgi vesicle-mediated transport	8	0	1.05	0.51872
GO:0006896	Golgi to vacuole transport	8	0	1.05	0.51872
GO:0007091	metaphase/anaphase transition of mitotic cell cycle	11	0	1.45	0.51964
GO:0007088	regulation of mitosis	11	0	1.45	0.51964
GO:0030071	regulation of mitotic metaphase/anaphase transition	11	0	1.45	0.51964
GO:0044784	metaphase/anaphase transition of cell cycle	11	0	1.45	0.51964
GO:1902099	regulation of metaphase/anaphase transition of cell cycle	11	0	1.45	0.51964
GO:0032940	secretion by cell	86	14	11.33	0.51976
GO:0046903	secretion	86	14	11.33	0.51976
GO:0051289	protein homotetramerization	7	1	0.92	0.52079
GO:0043605	cellular amide catabolic process	10	1	1.32	0.52109
GO:0043549	regulation of kinase activity	186	29	24.5	0.52144
GO:0051338	regulation of transferase activity	186	29	24.5	0.52144
GO:0045859	regulation of protein kinase activity	186	29	24.5	0.52144
GO:0031124	mRNA 3'-end processing	9	0	1.19	0.52158
GO:0006378	mRNA polyadenylation	9	0	1.19	0.52158
GO:0019860	uracil metabolic process	7	0	0.92	0.52183
GO:0006152	purine nucleoside catabolic process	514	71	67.69	0.52188
GO:0035194	posttranscriptional gene silencing by RNA	91	7	11.98	0.52269
GO:0080092	regulation of pollen tube growth	10	3	1.32	0.5235
GO:0010769	regulation of cell morphogenesis involved in differentiation	10	3	1.32	0.5235
GO:0019752	carboxylic acid metabolic process	1733	192	228.23	0.52368
GO:0071495	cellular response to endogenous stimulus	399	57	52.55	0.52383
GO:0072329	monocarboxylic acid catabolic process	172	12	22.65	0.52544
GO:0007017	microtubule-based process	252	55	33.19	0.52606
GO:0051051	negative regulation of transport	11	1	1.45	0.52683
GO:0048446	petal morphogenesis	23	1	3.03	0.52703
GO:0009164	nucleoside catabolic process	515	71	67.82	0.52711
GO:0042454	ribonucleoside catabolic process	515	71	67.82	0.52711
GO:0072523	purine-containing compound catabolic process	515	71	67.82	0.52711
GO:1901658	glycosyl compound catabolic process	515	71	67.82	0.52711
GO:0031408	oxylipin biosynthetic process	41	3	5.4	0.52712
GO:1903311	regulation of mRNA metabolic process	8	0	1.05	0.52858
GO:0050684	regulation of mRNA processing	8	0	1.05	0.52858
GO:0006567	threonine catabolic process	7	1	0.92	0.52969
GO:0016575	histone deacetylation	18	1	2.37	0.53071
GO:0080022	primary root development	11	2	1.45	0.53247
GO:0051707	response to other organism	694	102	91.4	0.53396
GO:0043207	response to external biotic stimulus	694	102	91.4	0.53396
GO:0016132	brassinosteroid biosynthetic process	55	10	7.24	0.53613
GO:0006066	alcohol metabolic process	270	42	35.56	0.53725
GO:0016049	cell growth	367	69	48.33	0.53741
GO:0090150	establishment of protein localization to membrane	177	15	23.31	0.53803
GO:0072657	protein localization to membrane	177	15	23.31	0.53803
GO:0009063	cellular amino acid catabolic process	128	16	16.86	0.53895
GO:0044710	single-organism metabolic process	6808	972	896.6	0.53927
GO:0046132	pyrimidine ribonucleoside biosynthetic process	28	1	3.69	0.53966
GO:0046134	pyrimidine nucleoside biosynthetic process	28	1	3.69	0.53966
GO:1901701	cellular response to oxygen-containing compound	416	36	54.79	0.54013
GO:0080156	mitochondrial mRNA modification	8	0	1.05	0.54078
GO:0009142	nucleoside triphosphate biosynthetic process	63	6	8.3	0.5426
GO:0071482	cellular response to light stimulus	41	4	5.4	0.54265
GO:0071478	cellular response to radiation	41	4	5.4	0.54265
GO:0010941	regulation of cell death	155	17	20.41	0.54353
GO:0044087	regulation of cellular component biogenesis	90	15	11.85	0.54353
GO:0031347	regulation of defense response	235	22	30.95	0.54411
GO:0032870	cellular response to hormone stimulus	397	57	52.28	0.54445
GO:2000377	regulation of reactive oxygen species metabolic process	56	6	7.38	0.54512
GO:0010498	proteasomal protein catabolic process	145	12	19.1	0.54554
GO:0051592	response to calcium ion	17	2	2.24	0.5459
GO:0042157	lipoprotein metabolic process	85	5	11.19	0.54628
GO:0045814	negative regulation of gene expression, epigenetic	109	12	14.36	0.54872
GO:0051028	mRNA transport	58	2	7.64	0.54934
GO:0000103	sulfate assimilation	10	1	1.32	0.54955
GO:0015781	pyrimidine nucleotide-sugar transport	6	0	0.79	0.54998
GO:0051168	nuclear export	63	2	8.3	0.55024
GO:0031112	positive regulation of microtubule polymerization or depolymerization	6	2	0.79	0.55059
GO:0031113	regulation of microtubule polymerization	6	2	0.79	0.55059
GO:0007602	phototransduction	14	1	1.84	0.55093
GO:0009585	red, far-red light phototransduction	14	1	1.84	0.55093
GO:0071470	cellular response to osmotic stress	10	1	1.32	0.55173
GO:0009625	response to insect	16	2	2.11	0.55285
GO:0015802	basic amino acid transport	34	5	4.48	0.5536
GO:0042401	cellular biogenic amine biosynthetic process	47	4	6.19	0.5549
GO:0009309	amine biosynthetic process	47	4	6.19	0.5549
GO:0006417	regulation of translation	113	8	14.88	0.55565
GO:0015718	monocarboxylic acid transport	23	3	3.03	0.55613
GO:0045017	glycerolipid biosynthetic process	152	12	20.02	0.55683
GO:0001510	RNA methylation	111	1	14.62	0.55698
GO:0046434	organophosphate catabolic process	531	73	69.93	0.55707
GO:0007008	outer mitochondrial membrane organization	11	0	1.45	0.55728
GO:0045040	protein import into mitochondrial outer membrane	11	0	1.45	0.55728
GO:0046785	microtubule polymerization	51	10	6.72	0.5574
GO:0045338	farnesyl diphosphate metabolic process	10	3	1.32	0.55765
GO:0001932	regulation of protein phosphorylation	189	29	24.89	0.55806
GO:0009266	response to temperature stimulus	518	71	68.22	0.55837
GO:0003002	regionalization	153	21	20.15	0.55855
GO:0010629	negative regulation of gene expression	255	22	33.58	0.55861
GO:0016926	protein desumoylation	28	5	3.69	0.55948
GO:0009154	purine ribonucleotide catabolic process	511	70	67.3	0.55985
GO:0009146	purine nucleoside triphosphate catabolic process	511	70	67.3	0.55985
GO:0009261	ribonucleotide catabolic process	511	70	67.3	0.55985
GO:0009203	ribonucleoside triphosphate catabolic process	511	70	67.3	0.55985
GO:0009207	purine ribonucleoside triphosphate catabolic process	511	70	67.3	0.55985
GO:0006195	purine nucleotide catabolic process	511	70	67.3	0.55985
GO:0030838	positive regulation of actin filament polymerization	65	10	8.56	0.56063
GO:0045010	actin nucleation	65	10	8.56	0.56063
GO:0048868	pollen tube development	101	15	13.3	0.56063
GO:0043647	inositol phosphate metabolic process	64	5	8.43	0.56086
GO:0009559	embryo sac central cell differentiation	14	1	1.84	0.5637
GO:0016265	death	220	26	28.97	0.56419
GO:0008219	cell death	220	26	28.97	0.56419
GO:0009166	nucleotide catabolic process	512	70	67.43	0.56513
GO:0009143	nucleoside triphosphate catabolic process	512	70	67.43	0.56513
GO:0006220	pyrimidine nucleotide metabolic process	125	7	16.46	0.5663
GO:0006732	coenzyme metabolic process	412	41	54.26	0.56638
GO:0048581	negative regulation of post-embryonic development	38	1	5	0.56678
GO:0000302	response to reactive oxygen species	194	24	25.55	0.56716
GO:0046501	protoporphyrinogen IX metabolic process	9	1	1.19	0.57
GO:0006782	protoporphyrinogen IX biosynthetic process	9	1	1.19	0.57
GO:1901292	nucleoside phosphate catabolic process	513	70	67.56	0.5704
GO:0009260	ribonucleotide biosynthetic process	181	7	23.84	0.57327
GO:0046390	ribose phosphate biosynthetic process	181	7	23.84	0.57327
GO:0010256	endomembrane system organization	93	16	12.25	0.57353
GO:0006809	nitric oxide biosynthetic process	6	1	0.79	0.57393
GO:0046209	nitric oxide metabolic process	6	1	0.79	0.57393
GO:0000096	sulfur amino acid metabolic process	245	34	32.27	0.57395
GO:0009875	pollen-pistil interaction	51	8	6.72	0.57404
GO:0044766	multi-organism transport	9	1	1.19	0.57431
GO:0090332	stomatal closure	10	1	1.32	0.57502
GO:0008283	cell proliferation	129	16	16.99	0.57569
GO:0016042	lipid catabolic process	212	18	27.92	0.57597
GO:0009831	plant-type cell wall modification involved in multidimensional cell growth	16	2	2.11	0.57691
GO:0042547	cell wall modification involved in multidimensional cell growth	16	2	2.11	0.57691
GO:2000026	regulation of multicellular organismal development	396	52	52.15	0.57785
GO:0032271	regulation of protein polymerization	81	13	10.67	0.57786
GO:0043254	regulation of protein complex assembly	81	13	10.67	0.57786
GO:0010243	response to organonitrogen compound	127	16	16.73	0.57794
GO:0006766	vitamin metabolic process	88	10	11.59	0.57851
GO:0009856	pollination	181	24	23.84	0.57943
GO:0044706	multi-multicellular organism process	181	24	23.84	0.57943
GO:0032259	methylation	583	46	76.78	0.58058
GO:0009071	serine family amino acid catabolic process	41	4	5.4	0.58132
GO:0071901	negative regulation of protein serine/threonine kinase activity	28	3	3.69	0.58228
GO:0006469	negative regulation of protein kinase activity	28	3	3.69	0.58228
GO:0033673	negative regulation of kinase activity	28	3	3.69	0.58228
GO:0051348	negative regulation of transferase activity	28	3	3.69	0.58228
GO:0040034	regulation of development, heterochronic	13	1	1.71	0.58237
GO:0046128	purine ribonucleoside metabolic process	619	82	81.52	0.58288
GO:0030834	regulation of actin filament depolymerization	6	0	0.79	0.58317
GO:0030835	negative regulation of actin filament depolymerization	6	0	0.79	0.58317
GO:0045185	maintenance of protein location	26	1	3.42	0.58414
GO:0048878	chemical homeostasis	155	17	20.41	0.58459
GO:0006221	pyrimidine nucleotide biosynthetic process	124	6	16.33	0.5846
GO:0071407	cellular response to organic cyclic compound	209	18	27.52	0.58605
GO:0042742	defense response to bacterium	246	39	32.4	0.58627
GO:0006839	mitochondrial transport	122	4	16.07	0.58679
GO:0042278	purine nucleoside metabolic process	620	82	81.65	0.58764
GO:0043069	negative regulation of programmed cell death	76	6	10.01	0.58769
GO:0010563	negative regulation of phosphorus metabolic process	33	4	4.35	0.58855
GO:0045936	negative regulation of phosphate metabolic process	33	4	4.35	0.58855
GO:0042451	purine nucleoside biosynthetic process	80	8	10.54	0.58892
GO:0046129	purine ribonucleoside biosynthetic process	80	8	10.54	0.58892
GO:0009750	response to fructose	66	9	8.69	0.58981
GO:0005986	sucrose biosynthetic process	9	0	1.19	0.59086
GO:0042330	taxis	7	0	0.92	0.59103
GO:0050918	positive chemotaxis	7	0	0.92	0.59103
GO:0010183	pollen tube guidance	7	0	0.92	0.59103
GO:0006935	chemotaxis	7	0	0.92	0.59103
GO:0006536	glutamate metabolic process	31	3	4.08	0.59149
GO:0009145	purine nucleoside triphosphate biosynthetic process	55	5	7.24	0.59174
GO:0009206	purine ribonucleoside triphosphate biosynthetic process	55	5	7.24	0.59174
GO:0006783	heme biosynthetic process	36	2	4.74	0.59202
GO:0000394	RNA splicing, via endonucleolytic cleavage and ligation	99	10	13.04	0.59286
GO:0010192	mucilage biosynthetic process	7	2	0.92	0.59399
GO:0051017	actin filament bundle assembly	10	1	1.32	0.59474
GO:0061572	actin filament bundle organization	10	1	1.32	0.59474
GO:0043572	plastid fission	17	2	2.24	0.59476
GO:0006561	proline biosynthetic process	12	1	1.58	0.59495
GO:0006796	phosphate-containing compound metabolic process	3350	469	441.19	0.59654
GO:0009112	nucleobase metabolic process	29	3	3.82	0.5969
GO:0098609	cell-cell adhesion	7	0	0.92	0.5981
GO:0009865	pollen tube adhesion	7	0	0.92	0.5981
GO:0009855	determination of bilateral symmetry	59	8	7.77	0.5983
GO:0010492	maintenance of shoot apical meristem identity	6	0	0.79	0.59855
GO:0016128	phytosteroid metabolic process	58	10	7.64	0.59876
GO:0045038	protein import into chloroplast thylakoid membrane	9	2	1.19	0.59898
GO:0043649	dicarboxylic acid catabolic process	11	0	1.45	0.59924
GO:0051781	positive regulation of cell division	6	1	0.79	0.6
GO:0009617	response to bacterium	292	46	38.46	0.60011
GO:0006357	regulation of transcription from RNA polymerase II promoter	29	0	3.82	0.60306
GO:0006739	NADP metabolic process	178	14	23.44	0.6038
GO:0009690	cytokinin metabolic process	21	3	2.77	0.60488
GO:0036260	RNA capping	8	0	1.05	0.60523
GO:0009452	7-methylguanosine RNA capping	8	0	1.05	0.60523
GO:0006085	acetyl-CoA biosynthetic process	13	2	1.71	0.60564
GO:0000024	maltose biosynthetic process	9	2	1.19	0.60594
GO:0033385	geranylgeranyl diphosphate metabolic process	6	2	0.79	0.6063
GO:0033386	geranylgeranyl diphosphate biosynthetic process	6	2	0.79	0.6063
GO:0006275	regulation of DNA replication	79	7	10.4	0.60695
GO:0034755	iron ion transmembrane transport	6	0	0.79	0.6073
GO:0042538	hyperosmotic salinity response	72	5	9.48	0.60768
GO:0010051	xylem and phloem pattern formation	61	8	8.03	0.60845
GO:0009910	negative regulation of flower development	23	0	3.03	0.60912
GO:0007030	Golgi organization	88	15	11.59	0.60913
GO:0019438	aromatic compound biosynthetic process	2290	238	301.59	0.60958
GO:0046500	S-adenosylmethionine metabolic process	9	2	1.19	0.60984
GO:0006564	L-serine biosynthetic process	6	0	0.79	0.61042
GO:0046794	transport of virus	8	1	1.05	0.61083
GO:0016125	sterol metabolic process	94	15	12.38	0.6114
GO:0010167	response to nitrate	54	9	7.11	0.61171
GO:0010099	regulation of photomorphogenesis	25	0	3.29	0.61214
GO:0080170	hydrogen peroxide transmembrane transport	7	1	0.92	0.61252
GO:0046131	pyrimidine ribonucleoside metabolic process	32	1	4.21	0.61545
GO:0006213	pyrimidine nucleoside metabolic process	32	1	4.21	0.61545
GO:0019363	pyridine nucleotide biosynthetic process	19	2	2.5	0.61613
GO:0046395	carboxylic acid catabolic process	301	29	39.64	0.61678
GO:0016054	organic acid catabolic process	301	29	39.64	0.61678
GO:0009799	specification of symmetry	61	8	8.03	0.61694
GO:0006342	chromatin silencing	108	12	14.22	0.61929
GO:0002831	regulation of response to biotic stimulus	17	0	2.24	0.62174
GO:0006415	translational termination	20	0	2.63	0.62211
GO:0010212	response to ionizing radiation	49	3	6.45	0.623
GO:0009119	ribonucleoside metabolic process	649	83	85.47	0.62313
GO:2000067	regulation of root morphogenesis	9	1	1.19	0.62333
GO:0009062	fatty acid catabolic process	162	12	21.33	0.62338
GO:0098542	defense response to other organism	496	70	65.32	0.6237
GO:0006072	glycerol-3-phosphate metabolic process	11	2	1.45	0.62565
GO:0009860	pollen tube growth	66	11	8.69	0.62584
GO:0006260	DNA replication	352	23	46.36	0.62674
GO:2000034	regulation of seed maturation	6	0	0.79	0.6272
GO:0010605	negative regulation of macromolecule metabolic process	303	25	39.9	0.62771
GO:0010540	basipetal auxin transport	11	3	1.45	0.62826
GO:1901615	organic hydroxy compound metabolic process	464	69	61.11	0.62845
GO:0009658	chloroplast organization	175	16	23.05	0.62907
GO:0042325	regulation of phosphorylation	192	29	25.29	0.62955
GO:0006268	DNA unwinding involved in DNA replication	9	1	1.19	0.63013
GO:0032787	monocarboxylic acid metabolic process	977	103	128.67	0.63134
GO:0016131	brassinosteroid metabolic process	57	10	7.51	0.63182
GO:0008064	regulation of actin polymerization or depolymerization	75	11	9.88	0.6321
GO:0032956	regulation of actin cytoskeleton organization	75	11	9.88	0.6321
GO:0032970	regulation of actin filament-based process	75	11	9.88	0.6321
GO:0030832	regulation of actin filament length	75	11	9.88	0.6321
GO:0030833	regulation of actin filament polymerization	75	11	9.88	0.6321
GO:0030041	actin filament polymerization	75	11	9.88	0.6321
GO:0046174	polyol catabolic process	18	2	2.37	0.63373
GO:0048510	regulation of timing of transition from vegetative to reproductive phase	12	1	1.58	0.63405
GO:0048506	regulation of timing of meristematic phase transition	12	1	1.58	0.63405
GO:0031109	microtubule polymerization or depolymerization	54	10	7.11	0.63408
GO:0009150	purine ribonucleotide metabolic process	615	78	80.99	0.63436
GO:0033383	geranyl diphosphate metabolic process	11	3	1.45	0.63527
GO:0006972	hyperosmotic response	120	15	15.8	0.63551
GO:0034219	carbohydrate transmembrane transport	39	6	5.14	0.64067
GO:0034285	response to disaccharide	93	11	12.25	0.64087
GO:0090567	reproductive shoot system development	517	65	68.09	0.6416
GO:0008380	RNA splicing	196	17	25.81	0.64207
GO:0010608	posttranscriptional regulation of gene expression	220	16	28.97	0.64247
GO:0006164	purine nucleotide biosynthetic process	100	5	13.17	0.64276
GO:0009773	photosynthetic electron transport in photosystem I	42	5	5.53	0.64349
GO:0002252	immune effector process	98	10	12.91	0.64449
GO:0006000	fructose metabolic process	6	1	0.79	0.64483
GO:0009785	blue light signaling pathway	13	2	1.71	0.64555
GO:0030522	intracellular receptor signaling pathway	13	2	1.71	0.64555
GO:0071483	cellular response to blue light	13	2	1.71	0.64555
GO:0006571	tyrosine biosynthetic process	8	1	1.05	0.6465
GO:0072521	purine-containing compound metabolic process	671	84	88.37	0.64676
GO:0010103	stomatal complex morphogenesis	79	11	10.4	0.64726
GO:0009642	response to light intensity	138	17	18.17	0.64874
GO:0006546	glycine catabolic process	39	4	5.14	0.64904
GO:0043038	amino acid activation	107	3	14.09	0.64947
GO:0043039	tRNA aminoacylation	107	3	14.09	0.64947
GO:0019684	photosynthesis, light reaction	221	14	29.11	0.64982
GO:0042775	mitochondrial ATP synthesis coupled electron transport	18	0	2.37	0.65
GO:0009744	response to sucrose	92	11	12.12	0.65075
GO:0009147	pyrimidine nucleoside triphosphate metabolic process	9	1	1.19	0.65127
GO:0016444	somatic cell DNA recombination	21	0	2.77	0.65136
GO:0015809	arginine transport	9	1	1.19	0.65299
GO:0000186	activation of MAPKK activity	109	18	14.36	0.65308
GO:0006740	NADPH regeneration	170	12	22.39	0.6534
GO:1901698	response to nitrogen compound	254	32	33.45	0.65361
GO:0015985	energy coupled proton transport, down electrochemical gradient	24	3	3.16	0.65425
GO:0015986	ATP synthesis coupled proton transport	24	3	3.16	0.65425
GO:0045730	respiratory burst	32	4	4.21	0.65439
GO:0051493	regulation of cytoskeleton organization	84	13	11.06	0.65447
GO:0009116	nucleoside metabolic process	679	89	89.42	0.6551
GO:0042743	hydrogen peroxide metabolic process	131	15	17.25	0.6564
GO:0000002	mitochondrial genome maintenance	7	0	0.92	0.65654
GO:0006346	methylation-dependent chromatin silencing	47	4	6.19	0.65668
GO:0000398	mRNA splicing, via spliceosome	72	7	9.48	0.65684
GO:0010035	response to inorganic substance	820	108	107.99	0.65693
GO:0006163	purine nucleotide metabolic process	637	78	83.89	0.65863
GO:0019321	pentose metabolic process	52	7	6.85	0.6589
GO:0015979	photosynthesis	317	20	41.75	0.65927
GO:0034440	lipid oxidation	149	12	19.62	0.65993
GO:0010048	vernalization response	45	6	5.93	0.66035
GO:0007076	mitotic chromosome condensation	7	1	0.92	0.66036
GO:0009086	methionine biosynthetic process	82	10	10.8	0.66094
GO:0009891	positive regulation of biosynthetic process	267	28	35.16	0.66193
GO:0051704	multi-organism process	1009	137	132.88	0.66212
GO:0006400	tRNA modification	36	1	4.74	0.66338
GO:0032958	inositol phosphate biosynthetic process	50	3	6.58	0.66341
GO:0048825	cotyledon development	45	3	5.93	0.66383
GO:0042592	homeostatic process	337	35	44.38	0.66395
GO:0046487	glyoxylate metabolic process	10	0	1.32	0.66414
GO:0051223	regulation of protein transport	9	0	1.19	0.66424
GO:0070201	regulation of establishment of protein localization	9	0	1.19	0.66424
GO:0051240	positive regulation of multicellular organismal process	33	3	4.35	0.66656
GO:0060284	regulation of cell development	12	3	1.58	0.66706
GO:0009113	purine nucleobase biosynthetic process	8	2	1.05	0.6676
GO:0009553	embryo sac development	126	1	16.59	0.66827
GO:0006672	ceramide metabolic process	17	1	2.24	0.66871
GO:0006265	DNA topological change	15	1	1.98	0.67227
GO:0044419	interspecies interaction between organisms	72	5	9.48	0.67242
GO:0009144	purine nucleoside triphosphate metabolic process	569	74	74.94	0.67467
GO:0009205	purine ribonucleoside triphosphate metabolic process	569	74	74.94	0.67467
GO:0006106	fumarate metabolic process	6	1	0.79	0.67474
GO:0043244	regulation of protein complex disassembly	22	1	2.9	0.67678
GO:0048508	embryonic meristem development	42	5	5.53	0.67683
GO:0006457	protein folding	284	29	37.4	0.67693
GO:0072522	purine-containing compound biosynthetic process	117	10	15.41	0.67773
GO:0009201	ribonucleoside triphosphate biosynthetic process	60	5	7.9	0.67776
GO:0071472	cellular response to salt stress	6	0	0.79	0.67782
GO:0005983	starch catabolic process	18	2	2.37	0.6787
GO:0015740	C4-dicarboxylate transport	18	2	2.37	0.67895
GO:0015743	malate transport	18	2	2.37	0.67895
GO:0031146	SCF-dependent proteasomal ubiquitin-dependent protein catabolic process	10	1	1.32	0.67907
GO:0010026	trichome differentiation	110	16	14.49	0.67908
GO:0042158	lipoprotein biosynthetic process	82	4	10.8	0.67929
GO:0006497	protein lipidation	82	4	10.8	0.67929
GO:0009915	phloem sucrose loading	8	1	1.05	0.67999
GO:0009199	ribonucleoside triphosphate metabolic process	574	74	75.59	0.68029
GO:0055062	phosphate ion homeostasis	6	1	0.79	0.68122
GO:0072506	trivalent inorganic anion homeostasis	6	1	0.79	0.68122
GO:0006555	methionine metabolic process	86	11	11.33	0.68249
GO:0006098	pentose-phosphate shunt	169	12	22.26	0.68286
GO:0016559	peroxisome fission	9	2	1.19	0.68305
GO:0009740	gibberellic acid mediated signaling pathway	36	4	4.74	0.6838
GO:0010476	gibberellin mediated signaling pathway	36	4	4.74	0.6838
GO:0071370	cellular response to gibberellin stimulus	36	4	4.74	0.6838
GO:0045596	negative regulation of cell differentiation	53	1	6.98	0.68567
GO:0006301	postreplication repair	23	1	3.03	0.68579
GO:0009141	nucleoside triphosphate metabolic process	579	76	76.25	0.68584
GO:0006887	exocytosis	56	7	7.38	0.68639
GO:1901657	glycosyl compound metabolic process	773	102	101.8	0.68684
GO:0045597	positive regulation of cell differentiation	8	1	1.05	0.6872
GO:0046165	alcohol biosynthetic process	189	28	24.89	0.68766
GO:0048440	carpel development	102	12	13.43	0.68888
GO:0051239	regulation of multicellular organismal process	412	55	54.26	0.69137
GO:0007346	regulation of mitotic cell cycle	64	5	8.43	0.69177
GO:0006097	glyoxylate cycle	9	0	1.19	0.6919
GO:0015693	magnesium ion transport	21	0	2.77	0.69248
GO:0015706	nitrate transport	67	12	8.82	0.69378
GO:0051094	positive regulation of developmental process	42	4	5.53	0.69413
GO:0034655	nucleobase-containing compound catabolic process	587	75	77.31	0.69457
GO:0006551	leucine metabolic process	17	0	2.24	0.69629
GO:0009124	nucleoside monophosphate biosynthetic process	107	6	14.09	0.69642
GO:0043687	post-translational protein modification	49	3	6.45	0.69663
GO:0019348	dolichol metabolic process	10	1	1.32	0.69725
GO:0019408	dolichol biosynthetic process	10	1	1.32	0.69725
GO:0016093	polyprenol metabolic process	10	1	1.32	0.69725
GO:0016094	polyprenol biosynthetic process	10	1	1.32	0.69725
GO:0070647	protein modification by small protein conjugation or removal	338	28	44.51	0.69741
GO:0018065	protein-cofactor linkage	6	1	0.79	0.69757
GO:0048863	stem cell differentiation	48	1	6.32	0.70095
GO:0048864	stem cell development	48	1	6.32	0.70095
GO:0019827	stem cell maintenance	48	1	6.32	0.70095
GO:0019395	fatty acid oxidation	145	11	19.1	0.70207
GO:0006635	fatty acid beta-oxidation	145	11	19.1	0.70207
GO:0043484	regulation of RNA splicing	8	0	1.05	0.70212
GO:0090329	regulation of DNA-dependent DNA replication	19	1	2.5	0.70251
GO:0034976	response to endoplasmic reticulum stress	148	21	19.49	0.70302
GO:0006848	pyruvate transport	9	1	1.19	0.70588
GO:0032147	activation of protein kinase activity	117	18	15.41	0.70623
GO:1901659	glycosyl compound biosynthetic process	192	22	25.29	0.70671
GO:0010260	organ senescence	36	5	4.74	0.70673
GO:0060548	negative regulation of cell death	81	6	10.67	0.70759
GO:0044764	multi-organism cellular process	39	3	5.14	0.70935
GO:0035821	modification of morphology or physiology of other organism	54	6	7.11	0.7101
GO:0002213	defense response to insect	11	1	1.45	0.71025
GO:0035266	meristem growth	110	31	14.49	0.7106
GO:0044092	negative regulation of molecular function	174	51	22.92	0.71133
GO:0015780	nucleotide-sugar transport	17	0	2.24	0.71277
GO:0009749	response to glucose	45	3	5.93	0.71321
GO:0015807	L-amino acid transport	11	1	1.45	0.71467
GO:0042744	hydrogen peroxide catabolic process	56	5	7.38	0.71474
GO:0010073	meristem maintenance	167	31	21.99	0.71548
GO:0009156	ribonucleoside monophosphate biosynthetic process	103	5	13.56	0.71572
GO:0051651	maintenance of location in cell	24	1	3.16	0.71589
GO:1901607	alpha-amino acid biosynthetic process	401	47	52.81	0.71597
GO:0001933	negative regulation of protein phosphorylation	30	3	3.95	0.7171
GO:0042326	negative regulation of phosphorylation	30	3	3.95	0.7171
GO:0031400	negative regulation of protein modification process	33	3	4.35	0.71716
GO:0006826	iron ion transport	36	6	4.74	0.71757
GO:0009957	epidermal cell fate specification	15	1	1.98	0.71777
GO:0010090	trichome morphogenesis	99	14	13.04	0.71786
GO:0010162	seed dormancy process	68	5	8.96	0.71789
GO:0022611	dormancy process	68	5	8.96	0.71789
GO:0000165	MAPK cascade	239	36	31.48	0.71812
GO:0006473	protein acetylation	49	2	6.45	0.71875
GO:0006475	internal protein amino acid acetylation	49	2	6.45	0.71875
GO:0016573	histone acetylation	49	2	6.45	0.71875
GO:0018393	internal peptidyl-lysine acetylation	49	2	6.45	0.71875
GO:0018394	peptidyl-lysine acetylation	49	2	6.45	0.71875
GO:0006352	DNA-templated transcription, initiation	50	2	6.58	0.71919
GO:0033517	myo-inositol hexakisphosphate metabolic process	49	3	6.45	0.71976
GO:0010264	myo-inositol hexakisphosphate biosynthetic process	49	3	6.45	0.71976
GO:0006508	proteolysis	882	111	116.16	0.72091
GO:0007031	peroxisome organization	110	7	14.49	0.72178
GO:0006928	cellular component movement	98	27	12.91	0.72183
GO:0006397	mRNA processing	132	9	17.38	0.72223
GO:0006071	glycerol metabolic process	13	3	1.71	0.72224
GO:0015713	phosphoglycerate transport	7	0	0.92	0.72234
GO:0042873	aldonate transport	7	0	0.92	0.72234
GO:0046164	alcohol catabolic process	22	3	2.9	0.72304
GO:1901616	organic hydroxy compound catabolic process	22	3	2.9	0.72304
GO:0009220	pyrimidine ribonucleotide biosynthetic process	105	2	13.83	0.72349
GO:0009218	pyrimidine ribonucleotide metabolic process	105	2	13.83	0.72349
GO:0044282	small molecule catabolic process	328	33	43.2	0.72406
GO:0009117	nucleotide metabolic process	1022	109	134.59	0.72424
GO:0001934	positive regulation of protein phosphorylation	120	18	15.8	0.72471
GO:0033674	positive regulation of kinase activity	120	18	15.8	0.72471
GO:0051347	positive regulation of transferase activity	120	18	15.8	0.72471
GO:0045860	positive regulation of protein kinase activity	120	18	15.8	0.72471
GO:0032258	CVT pathway	11	0	1.45	0.72742
GO:0048465	corolla development	38	3	5	0.72779
GO:0048441	petal development	38	3	5	0.72779
GO:0030048	actin filament-based movement	22	2	2.9	0.72798
GO:0019693	ribose phosphate metabolic process	707	79	93.11	0.72844
GO:0009259	ribonucleotide metabolic process	707	79	93.11	0.72844
GO:0009148	pyrimidine nucleoside triphosphate biosynthetic process	8	0	1.05	0.72933
GO:0009208	pyrimidine ribonucleoside triphosphate metabolic process	8	0	1.05	0.72933
GO:0009209	pyrimidine ribonucleoside triphosphate biosynthetic process	8	0	1.05	0.72933
GO:0046036	CTP metabolic process	8	0	1.05	0.72933
GO:0006241	CTP biosynthetic process	8	0	1.05	0.72933
GO:0007568	aging	77	12	10.14	0.73
GO:0032875	regulation of DNA endoreduplication	18	1	2.37	0.73015
GO:0042816	vitamin B6 metabolic process	10	0	1.32	0.73099
GO:0042819	vitamin B6 biosynthetic process	10	0	1.32	0.73099
GO:0030308	negative regulation of cell growth	6	1	0.79	0.73143
GO:0016072	rRNA metabolic process	222	14	29.24	0.73224
GO:0044237	cellular metabolic process	10354	1180	1363.6	0.7331
GO:0043622	cortical microtubule organization	17	2	2.24	0.73337
GO:0006850	mitochondrial pyruvate transport	8	1	1.05	0.73375
GO:0051093	negative regulation of developmental process	96	3	12.64	0.73516
GO:0044264	cellular polysaccharide metabolic process	486	94	64	0.73552
GO:0006432	phenylalanyl-tRNA aminoacylation	6	0	0.79	0.73657
GO:0031401	positive regulation of protein modification process	122	18	16.07	0.73661
GO:0010017	red or far-red light signaling pathway	21	1	2.77	0.73719
GO:0071489	cellular response to red or far red light	21	1	2.77	0.73719
GO:0009942	longitudinal axis specification	6	1	0.79	0.73821
GO:0000578	embryonic axis specification	6	1	0.79	0.73821
GO:0046854	phosphatidylinositol phosphorylation	33	6	4.35	0.73837
GO:0046834	lipid phosphorylation	33	6	4.35	0.73837
GO:0051276	chromosome organization	497	46	65.45	0.7386
GO:0042732	D-xylose metabolic process	16	1	2.11	0.73865
GO:0009892	negative regulation of metabolic process	321	26	42.27	0.74023
GO:0010020	chloroplast fission	15	2	1.98	0.74048
GO:1901137	carbohydrate derivative biosynthetic process	533	39	70.19	0.74187
GO:0010431	seed maturation	77	6	10.14	0.74199
GO:0046777	protein autophosphorylation	80	8	10.54	0.74235
GO:0010562	positive regulation of phosphorus metabolic process	123	18	16.2	0.74242
GO:0045937	positive regulation of phosphate metabolic process	123	18	16.2	0.74242
GO:0042327	positive regulation of phosphorylation	123	18	16.2	0.74242
GO:1901362	organic cyclic compound biosynthetic process	2474	274	325.82	0.7425
GO:0002679	respiratory burst involved in defense response	31	4	4.08	0.74255
GO:0010200	response to chitin	114	12	15.01	0.7428
GO:0035437	maintenance of protein localization in endoplasmic reticulum	11	0	1.45	0.74297
GO:0006621	protein retention in ER lumen	11	0	1.45	0.74297
GO:0000904	cell morphogenesis involved in differentiation	169	26	22.26	0.74315
GO:0006188	IMP biosynthetic process	14	0	1.84	0.74396
GO:0046040	IMP metabolic process	14	0	1.84	0.74396
GO:0006829	zinc ion transport	19	1	2.5	0.74444
GO:2000030	regulation of response to red or far red light	27	0	3.56	0.74475
GO:0006364	rRNA processing	218	14	28.71	0.74487
GO:0006537	glutamate biosynthetic process	8	1	1.05	0.74673
GO:0009888	tissue development	683	96	89.95	0.74777
GO:0032880	regulation of protein localization	33	1	4.35	0.74809
GO:0035196	production of miRNAs involved in gene silencing by miRNA	57	6	7.51	0.74809
GO:0030091	protein repair	7	0	0.92	0.7489
GO:0010206	photosystem II repair	7	0	0.92	0.7489
GO:0010061	regulation of trichoblast fate specification	8	1	1.05	0.74945
GO:0010057	trichoblast fate specification	8	1	1.05	0.74945
GO:0030856	regulation of epithelial cell differentiation	8	1	1.05	0.74945
GO:0045604	regulation of epidermal cell differentiation	8	1	1.05	0.74945
GO:0042659	regulation of cell fate specification	8	1	1.05	0.74945
GO:0009410	response to xenobiotic stimulus	16	2	2.11	0.75101
GO:0016071	mRNA metabolic process	263	18	34.64	0.75179
GO:0010152	pollen maturation	11	1	1.45	0.75334
GO:0010267	production of ta-siRNAs involved in RNA interference	47	4	6.19	0.75341
GO:0044700	single organism signaling	1342	192	176.74	0.75368
GO:0009791	post-embryonic development	1202	141	158.3	0.75422
GO:0052545	callose localization	53	4	6.98	0.75465
GO:0033037	polysaccharide localization	53	4	6.98	0.75465
GO:0009057	macromolecule catabolic process	639	61	84.15	0.75509
GO:0023052	signaling	1343	192	176.87	0.75518
GO:0009739	response to gibberellin	62	8	8.17	0.75658
GO:0046890	regulation of lipid biosynthetic process	14	1	1.84	0.7571
GO:0048582	positive regulation of post-embryonic development	32	3	4.21	0.75729
GO:0040007	growth	514	98	67.69	0.7576
GO:0009250	glucan biosynthetic process	279	37	36.74	0.75761
GO:0042176	regulation of protein catabolic process	16	1	2.11	0.75815
GO:0006312	mitotic recombination	31	0	4.08	0.75926
GO:2000243	positive regulation of reproductive process	20	2	2.63	0.75958
GO:0033554	cellular response to stress	684	73	90.08	0.76117
GO:0006835	dicarboxylic acid transport	32	2	4.21	0.76187
GO:0010091	trichome branching	16	1	2.11	0.76271
GO:0070585	protein localization to mitochondrion	74	2	9.75	0.76335
GO:0006626	protein targeting to mitochondrion	74	2	9.75	0.76335
GO:0072655	establishment of protein localization to mitochondrion	74	2	9.75	0.76335
GO:0023014	signal transduction by phosphorylation	270	38	35.56	0.76395
GO:0007067	mitotic nuclear division	61	7	8.03	0.7641
GO:0043408	regulation of MAPK cascade	127	18	16.73	0.76486
GO:0022402	cell cycle process	496	75	65.32	0.76566
GO:0080050	regulation of seed development	7	0	0.92	0.76655
GO:2000242	negative regulation of reproductive process	25	0	3.29	0.7667
GO:0009566	fertilization	11	1	1.45	0.76673
GO:0009567	double fertilization forming a zygote and endosperm	11	1	1.45	0.76673
GO:0009887	organ morphogenesis	266	30	35.03	0.76681
GO:0006448	regulation of translational elongation	26	0	3.42	0.76699
GO:0042991	transcription factor import into nucleus	12	0	1.58	0.76773
GO:0009399	nitrogen fixation	6	1	0.79	0.76807
GO:0048574	long-day photoperiodism, flowering	8	0	1.05	0.76865
GO:0034599	cellular response to oxidative stress	73	6	9.61	0.76947
GO:0044403	symbiosis, encompassing mutualism through parasitism	71	5	9.35	0.7701
GO:0098586	cellular response to virus	34	0	4.48	0.77184
GO:0009657	plastid organization	304	26	40.04	0.77187
GO:0044262	cellular carbohydrate metabolic process	631	108	83.1	0.77262
GO:0006112	energy reserve metabolic process	14	1	1.84	0.77321
GO:0005977	glycogen metabolic process	14	1	1.84	0.77321
GO:0005978	glycogen biosynthetic process	14	1	1.84	0.77321
GO:0070301	cellular response to hydrogen peroxide	59	5	7.77	0.77355
GO:0070838	divalent metal ion transport	164	22	21.6	0.77386
GO:0009908	flower development	506	62	66.64	0.77442
GO:0006471	protein ADP-ribosylation	7	1	0.92	0.77507
GO:0007140	male meiosis	14	0	1.84	0.77637
GO:0044275	cellular carbohydrate catabolic process	33	3	4.35	0.77649
GO:0030261	chromosome condensation	13	2	1.71	0.7765
GO:0042168	heme metabolic process	38	2	5	0.77764
GO:0009409	response to cold	299	38	39.38	0.7781
GO:0001522	pseudouridine synthesis	22	0	2.9	0.77825
GO:0009816	defense response to bacterium, incompatible interaction	8	2	1.05	0.77924
GO:0006541	glutamine metabolic process	21	3	2.77	0.78017
GO:0035195	gene silencing by miRNA	58	6	7.64	0.78054
GO:0008154	actin polymerization or depolymerization	95	13	12.51	0.78154
GO:0009108	coenzyme biosynthetic process	163	15	21.47	0.78183
GO:0006591	ornithine metabolic process	8	1	1.05	0.78186
GO:0001708	cell fate specification	40	6	5.27	0.78301
GO:0006753	nucleoside phosphate metabolic process	1028	111	135.38	0.78304
GO:0009065	glutamine family amino acid catabolic process	18	1	2.37	0.78333
GO:0048507	meristem development	293	46	38.59	0.78464
GO:2000112	regulation of cellular macromolecule biosynthetic process	1398	139	184.11	0.78473
GO:0010496	intercellular transport	11	1	1.45	0.7851
GO:0009838	abscission	26	4	3.42	0.78653
GO:0007267	cell-cell signaling	29	3	3.82	0.78739
GO:0044272	sulfur compound biosynthetic process	356	47	46.88	0.78815
GO:0051301	cell division	526	86	69.27	0.78818
GO:0048467	gynoecium development	112	12	14.75	0.78884
GO:0000375	RNA splicing, via transesterification reactions	77	7	10.14	0.78901
GO:0006144	purine nucleobase metabolic process	13	2	1.71	0.79001
GO:0044271	cellular nitrogen compound biosynthetic process	2153	203	283.54	0.79119
GO:0019439	aromatic compound catabolic process	736	107	96.93	0.79123
GO:0009067	aspartate family amino acid biosynthetic process	117	14	15.41	0.79198
GO:0010072	primary shoot apical meristem specification	30	3	3.95	0.79243
GO:0019400	alditol metabolic process	14	3	1.84	0.79301
GO:0046700	heterocycle catabolic process	692	91	91.13	0.79351
GO:0002239	response to oomycetes	9	1	1.19	0.79388
GO:0044270	cellular nitrogen compound catabolic process	693	90	91.27	0.79433
GO:0000377	RNA splicing, via transesterification reactions with bulged adenosine as nucleophile	76	7	10.01	0.79467
GO:0034614	cellular response to reactive oxygen species	69	6	9.09	0.79503
GO:0006399	tRNA metabolic process	203	8	26.73	0.79567
GO:0032446	protein modification by small protein conjugation	279	23	36.74	0.79711
GO:0044802	single-organism membrane organization	333	26	43.86	0.79789
GO:0031110	regulation of microtubule polymerization or depolymerization	9	2	1.19	0.79826
GO:0070507	regulation of microtubule cytoskeleton organization	9	2	1.19	0.79826
GO:0032886	regulation of microtubule-based process	9	2	1.19	0.79826
GO:0022900	electron transport chain	185	11	24.36	0.7998
GO:0010106	cellular response to iron ion starvation	18	3	2.37	0.79987
GO:0034637	cellular carbohydrate biosynthetic process	437	74	57.55	0.79987
GO:0009827	plant-type cell wall modification	58	9	7.64	0.79988
GO:0090304	nucleic acid metabolic process	3485	282	458.97	0.80004
GO:0055046	microgametogenesis	13	2	1.71	0.80063
GO:0035445	borate transmembrane transport	9	0	1.19	0.80107
GO:0046713	borate transport	9	0	1.19	0.80107
GO:0010044	response to aluminum ion	7	1	0.92	0.80157
GO:0015969	guanosine tetraphosphate metabolic process	8	1	1.05	0.80167
GO:0034035	purine ribonucleoside bisphosphate metabolic process	8	1	1.05	0.80167
GO:0010556	regulation of macromolecule biosynthetic process	1400	140	184.38	0.80194
GO:1901361	organic cyclic compound catabolic process	753	109	99.17	0.8048
GO:0044763	single-organism cellular process	7617	978	1003.14	0.8054
GO:0000413	protein peptidyl-prolyl isomerization	65	0	8.56	0.80664
GO:0018130	heterocycle biosynthetic process	2195	219	289.08	0.80855
GO:0072525	pyridine-containing compound biosynthetic process	29	2	3.82	0.80865
GO:0019751	polyol metabolic process	95	12	12.51	0.80873
GO:0009867	jasmonic acid mediated signaling pathway	88	7	11.59	0.8099
GO:0071395	cellular response to jasmonic acid stimulus	88	7	11.59	0.8099
GO:0030422	production of siRNA involved in RNA interference	63	6	8.3	0.81067
GO:0010199	organ boundary specification between lateral organs and the meristem	6	0	0.79	0.81084
GO:0010160	formation of organ boundary	6	0	0.79	0.81084
GO:0048859	formation of anatomical boundary	6	0	0.79	0.81084
GO:0009911	positive regulation of flower development	19	2	2.5	0.81088
GO:0009937	regulation of gibberellic acid mediated signaling pathway	13	1	1.71	0.8122
GO:0051865	protein autoubiquitination	7	1	0.92	0.81299
GO:0052542	defense response by callose deposition	38	3	5	0.81418
GO:0043543	protein acylation	115	6	15.15	0.81469
GO:0043450	alkene biosynthetic process	52	5	6.85	0.81543
GO:0043449	cellular alkene metabolic process	52	5	6.85	0.81543
GO:1900673	olefin metabolic process	52	5	6.85	0.81543
GO:1900674	olefin biosynthetic process	52	5	6.85	0.81543
GO:0009692	ethylene metabolic process	52	5	6.85	0.81543
GO:0009693	ethylene biosynthetic process	52	5	6.85	0.81543
GO:0043043	peptide biosynthetic process	7	0	0.92	0.81583
GO:0072595	maintenance of protein localization in organelle	14	0	1.84	0.81625
GO:0009765	photosynthesis, light harvesting	33	2	4.35	0.81644
GO:0010565	regulation of cellular ketone metabolic process	29	3	3.82	0.81664
GO:0071577	zinc ion transmembrane transport	13	1	1.71	0.81721
GO:0000911	cytokinesis by cell plate formation	90	10	11.85	0.81806
GO:1902410	mitotic cytokinetic process	90	10	11.85	0.81806
GO:0000281	mitotic cytokinesis	90	10	11.85	0.81806
GO:0009828	plant-type cell wall loosening	13	2	1.71	0.81833
GO:0043405	regulation of MAP kinase activity	18	0	2.37	0.81923
GO:0006073	cellular glucan metabolic process	377	66	49.65	0.81941
GO:0044042	glucan metabolic process	377	66	49.65	0.81941
GO:0044273	sulfur compound catabolic process	9	1	1.19	0.81956
GO:0006790	sulfur compound metabolic process	474	64	62.42	0.82007
GO:1901401	regulation of tetrapyrrole metabolic process	12	0	1.58	0.82023
GO:0048869	cellular developmental process	745	98	98.11	0.82047
GO:0007165	signal transduction	1322	188	174.1	0.82065
GO:1901264	carbohydrate derivative transport	43	1	5.66	0.82089
GO:0070071	proton-transporting two-sector ATPase complex assembly	7	0	0.92	0.82384
GO:0051644	plastid localization	80	7	10.54	0.82444
GO:0009251	glucan catabolic process	21	2	2.77	0.82497
GO:0044247	cellular polysaccharide catabolic process	21	2	2.77	0.82497
GO:0035966	response to topologically incorrect protein	183	12	24.1	0.82532
GO:0010374	stomatal complex development	121	16	15.94	0.82541
GO:0090558	plant epidermis development	121	16	15.94	0.82541
GO:0061024	membrane organization	345	27	45.44	0.82586
GO:0060341	regulation of cellular localization	10	0	1.32	0.8268
GO:0010050	vegetative phase change	23	1	3.03	0.82703
GO:0032504	multicellular organism reproduction	183	13	24.1	0.8271
GO:0016070	RNA metabolic process	2437	213	320.95	0.82745
GO:0032270	positive regulation of cellular protein metabolic process	145	19	19.1	0.82767
GO:0071322	cellular response to carbohydrate stimulus	66	1	8.69	0.82891
GO:0072524	pyridine-containing compound metabolic process	205	16	27	0.82892
GO:0007154	cell communication	1510	214	198.86	0.82978
GO:0000041	transition metal ion transport	110	12	14.49	0.8302
GO:0005991	trehalose metabolic process	28	3	3.69	0.83038
GO:0005992	trehalose biosynthetic process	28	3	3.69	0.83038
GO:0009163	nucleoside biosynthetic process	106	9	13.96	0.83249
GO:0042455	ribonucleoside biosynthetic process	106	9	13.96	0.83249
GO:0007062	sister chromatid cohesion	60	3	7.9	0.83307
GO:0010467	gene expression	2971	237	391.27	0.83339
GO:0006542	glutamine biosynthetic process	8	1	1.05	0.8337
GO:0010942	positive regulation of cell death	6	1	0.79	0.83371
GO:0009902	chloroplast relocation	78	7	10.27	0.83418
GO:0051667	establishment of plastid localization	78	7	10.27	0.83418
GO:0019430	removal of superoxide radicals	9	1	1.19	0.83431
GO:0071450	cellular response to oxygen radical	9	1	1.19	0.83431
GO:0071451	cellular response to superoxide	9	1	1.19	0.83431
GO:0009767	photosynthetic electron transport chain	57	5	7.51	0.83437
GO:0044260	cellular macromolecule metabolic process	6949	719	915.17	0.83478
GO:0006596	polyamine biosynthetic process	22	1	2.9	0.83489
GO:0032506	cytokinetic process	98	10	12.91	0.83631
GO:1903047	mitotic cell cycle process	159	19	20.94	0.83673
GO:0008152	metabolic process	14005	1828	1844.42	0.83689
GO:0042218	1-aminocyclopropane-1-carboxylate biosynthetic process	13	0	1.71	0.83702
GO:0018871	1-aminocyclopropane-1-carboxylate metabolic process	13	0	1.71	0.83702
GO:0052386	cell wall thickening	28	4	3.69	0.83731
GO:0045003	double-strand break repair via synthesis-dependent strand annealing	7	0	0.92	0.83776
GO:0019362	pyridine nucleotide metabolic process	195	16	25.68	0.83832
GO:0046686	response to cadmium ion	358	43	47.15	0.83867
GO:0051510	regulation of unidimensional cell growth	55	9	7.24	0.83867
GO:0046496	nicotinamide nucleotide metabolic process	188	14	24.76	0.84055
GO:0006396	RNA processing	688	46	90.61	0.84079
GO:0051246	regulation of protein metabolic process	401	42	52.81	0.84124
GO:0072511	divalent inorganic cation transport	166	22	21.86	0.84146
GO:0071545	inositol phosphate catabolic process	7	1	0.92	0.84146
GO:0046855	inositol phosphate dephosphorylation	7	1	0.92	0.84146
GO:0046838	phosphorylated carbohydrate dephosphorylation	7	1	0.92	0.84146
GO:0016567	protein ubiquitination	269	23	35.43	0.84213
GO:0045292	mRNA cis splicing, via spliceosome	7	0	0.92	0.84257
GO:0051247	positive regulation of protein metabolic process	148	20	19.49	0.84329
GO:0022904	respiratory electron transport chain	30	1	3.95	0.8439
GO:0051640	organelle localization	104	11	13.7	0.84424
GO:0009631	cold acclimation	8	0	1.05	0.8468
GO:0031050	dsRNA fragmentation	71	6	9.35	0.84696
GO:0070918	production of small RNA involved in gene silencing by RNA	71	6	9.35	0.84696
GO:0071359	cellular response to dsRNA	71	6	9.35	0.84696
GO:0043331	response to dsRNA	71	6	9.35	0.84696
GO:0009890	negative regulation of biosynthetic process	184	16	24.23	0.84775
GO:0006526	arginine biosynthetic process	13	1	1.71	0.84826
GO:0033692	cellular polysaccharide biosynthetic process	391	68	51.49	0.84828
GO:0052249	modulation of RNA levels in other organism involved in symbiotic interaction	32	0	4.21	0.84847
GO:0052018	modulation by symbiont of RNA levels in host	32	0	4.21	0.84847
GO:0009616	virus induced gene silencing	32	0	4.21	0.84847
GO:0006289	nucleotide-excision repair	22	0	2.9	0.84874
GO:0015748	organophosphate ester transport	89	7	11.72	0.84905
GO:0006013	mannose metabolic process	8	1	1.05	0.84912
GO:0044765	single-organism transport	2485	325	327.27	0.84963
GO:0019674	NAD metabolic process	10	0	1.32	0.85014
GO:0019359	nicotinamide nucleotide biosynthetic process	10	0	1.32	0.85014
GO:1901564	organonitrogen compound metabolic process	2123	235	279.59	0.85068
GO:0009312	oligosaccharide biosynthetic process	56	5	7.38	0.85165
GO:0009756	carbohydrate mediated signaling	65	1	8.56	0.85175
GO:0010182	sugar mediated signaling pathway	65	1	8.56	0.85175
GO:0046148	pigment biosynthetic process	266	40	35.03	0.85281
GO:0019217	regulation of fatty acid metabolic process	6	1	0.79	0.85435
GO:0010304	PSII associated light-harvesting complex II catabolic process	15	2	1.98	0.85453
GO:0006771	riboflavin metabolic process	9	0	1.19	0.85458
GO:0009231	riboflavin biosynthetic process	9	0	1.19	0.85458
GO:0042726	flavin-containing compound metabolic process	9	0	1.19	0.85458
GO:0042727	flavin-containing compound biosynthetic process	9	0	1.19	0.85458
GO:0043161	proteasome-mediated ubiquitin-dependent protein catabolic process	87	7	11.46	0.85537
GO:0016050	vesicle organization	14	2	1.84	0.85576
GO:0048232	male gamete generation	15	2	1.98	0.85611
GO:0009064	glutamine family amino acid metabolic process	71	8	9.35	0.85711
GO:0046173	polyol biosynthetic process	58	6	7.64	0.85723
GO:0009694	jasmonic acid metabolic process	70	8	9.22	0.85732
GO:0032268	regulation of cellular protein metabolic process	371	41	48.86	0.85843
GO:0090407	organophosphate biosynthetic process	689	48	90.74	0.85915
GO:0023051	regulation of signaling	265	32	34.9	0.86153
GO:0009966	regulation of signal transduction	265	32	34.9	0.86153
GO:0050801	ion homeostasis	132	15	17.38	0.86186
GO:0072593	reactive oxygen species metabolic process	159	18	20.94	0.86366
GO:0009861	jasmonic acid and ethylene-dependent systemic resistance	10	0	1.32	0.86377
GO:0010639	negative regulation of organelle organization	24	1	3.16	0.86388
GO:0051129	negative regulation of cellular component organization	24	1	3.16	0.86388
GO:0009889	regulation of biosynthetic process	1453	147	191.36	0.86406
GO:1901605	alpha-amino acid metabolic process	557	61	73.36	0.86458
GO:0055086	nucleobase-containing small molecule metabolic process	1086	121	143.02	0.86535
GO:0006402	mRNA catabolic process	60	3	7.9	0.86548
GO:0008614	pyridoxine metabolic process	8	0	1.05	0.86563
GO:0008615	pyridoxine biosynthetic process	8	0	1.05	0.86563
GO:0046184	aldehyde biosynthetic process	8	0	1.05	0.86563
GO:0006528	asparagine metabolic process	7	0	0.92	0.8661
GO:0006529	asparagine biosynthetic process	7	0	0.92	0.8661
GO:0035670	plant-type ovary development	86	8	11.33	0.86721
GO:0048481	ovule development	86	8	11.33	0.86721
GO:0010453	regulation of cell fate commitment	10	1	1.32	0.86764
GO:0006091	generation of precursor metabolites and energy	581	45	76.52	0.86822
GO:0043414	macromolecule methylation	312	19	41.09	0.86891
GO:0034470	ncRNA processing	290	18	38.19	0.86913
GO:0010646	regulation of cell communication	268	33	35.29	0.86979
GO:0048236	plant-type spore development	26	4	3.42	0.86981
GO:0009107	lipoate biosynthetic process	10	1	1.32	0.87007
GO:0048519	negative regulation of biological process	619	49	81.52	0.87043
GO:0006278	RNA-dependent DNA replication	130	4	17.12	0.87053
GO:0046939	nucleotide phosphorylation	15	0	1.98	0.87263
GO:0001558	regulation of cell growth	64	10	8.43	0.87279
GO:0051193	regulation of cofactor metabolic process	13	0	1.71	0.87338
GO:0000278	mitotic cell cycle	251	24	33.06	0.87387
GO:0022604	regulation of cell morphogenesis	57	9	7.51	0.87487
GO:0009100	glycoprotein metabolic process	163	11	21.47	0.87501
GO:0002237	response to molecule of bacterial origin	22	4	2.9	0.8754
GO:0009646	response to absence of light	18	0	2.37	0.87572
GO:0006401	RNA catabolic process	66	3	8.69	0.87668
GO:0044712	single-organism catabolic process	1459	175	192.15	0.87761
GO:0045333	cellular respiration	114	10	15.01	0.87822
GO:0042753	positive regulation of circadian rhythm	6	0	0.79	0.87847
GO:0009793	embryo development ending in seed dormancy	345	30	45.44	0.87867
GO:0031122	cytoplasmic microtubule organization	19	2	2.5	0.8787
GO:0007623	circadian rhythm	62	8	8.17	0.87928
GO:0048511	rhythmic process	62	8	8.17	0.87928
GO:0006897	endocytosis	41	1	5.4	0.87974
GO:0031399	regulation of protein modification process	265	33	34.9	0.88003
GO:0055080	cation homeostasis	120	12	15.8	0.88037
GO:0010440	stomatal lineage progression	35	4	4.61	0.88065
GO:0051260	protein homooligomerization	16	1	2.11	0.8811
GO:0042822	pyridoxal phosphate metabolic process	7	0	0.92	0.88139
GO:0042823	pyridoxal phosphate biosynthetic process	7	0	0.92	0.88139
GO:0060255	regulation of macromolecule metabolic process	1758	185	231.52	0.8821
GO:0010207	photosystem II assembly	111	9	14.62	0.8828
GO:0015766	disaccharide transport	13	1	1.71	0.88281
GO:0015770	sucrose transport	13	1	1.71	0.88281
GO:0015772	oligosaccharide transport	13	1	1.71	0.88281
GO:0006625	protein targeting to peroxisome	84	2	11.06	0.88323
GO:0072662	protein localization to peroxisome	84	2	11.06	0.88323
GO:0072663	establishment of protein localization to peroxisome	84	2	11.06	0.88323
GO:0043574	peroxisomal transport	84	2	11.06	0.88323
GO:0051252	regulation of RNA metabolic process	1284	134	169.1	0.88354
GO:0006366	transcription from RNA polymerase II promoter	78	0	10.27	0.88361
GO:0090066	regulation of anatomical structure size	110	21	14.49	0.88425
GO:0032535	regulation of cellular component size	110	21	14.49	0.88425
GO:0009056	catabolic process	2062	239	271.56	0.88439
GO:0046365	monosaccharide catabolic process	223	14	29.37	0.88475
GO:0006007	glucose catabolic process	223	14	29.37	0.88475
GO:0019320	hexose catabolic process	223	14	29.37	0.88475
GO:0032507	maintenance of protein location in cell	22	1	2.9	0.88503
GO:0031326	regulation of cellular biosynthetic process	1423	141	187.41	0.88506
GO:0000956	nuclear-transcribed mRNA catabolic process	58	3	7.64	0.8854
GO:0051649	establishment of localization in cell	1076	78	141.71	0.88585
GO:0051050	positive regulation of transport	8	0	1.05	0.88601
GO:0010959	regulation of metal ion transport	8	0	1.05	0.88601
GO:0006886	intracellular protein transport	715	36	94.16	0.88602
GO:0051188	cofactor biosynthetic process	291	21	38.32	0.88616
GO:1902582	single-organism intracellular transport	742	43	97.72	0.88633
GO:0006801	superoxide metabolic process	22	3	2.9	0.88695
GO:0007049	cell cycle	647	92	85.21	0.88706
GO:0010558	negative regulation of macromolecule biosynthetic process	178	16	23.44	0.88764
GO:2000113	negative regulation of cellular macromolecule biosynthetic process	178	16	23.44	0.88764
GO:0035601	protein deacylation	22	1	2.9	0.88858
GO:0006476	protein deacetylation	22	1	2.9	0.88858
GO:0098732	macromolecule deacylation	22	1	2.9	0.88858
GO:0015914	phospholipid transport	16	0	2.11	0.88859
GO:0006487	protein N-linked glycosylation	53	2	6.98	0.88894
GO:0043412	macromolecule modification	2635	320	347.02	0.89052
GO:0072596	establishment of protein localization to chloroplast	53	4	6.98	0.89079
GO:0072598	protein localization to chloroplast	53	4	6.98	0.89079
GO:0045036	protein targeting to chloroplast	53	4	6.98	0.89079
GO:0006338	chromatin remodeling	25	2	3.29	0.89131
GO:0071704	organic substance metabolic process	11074	1381	1458.42	0.89247
GO:0048583	regulation of response to stimulus	517	57	68.09	0.89256
GO:0043401	steroid hormone mediated signaling pathway	38	4	5	0.89272
GO:0009742	brassinosteroid mediated signaling pathway	38	4	5	0.89272
GO:0071367	cellular response to brassinosteroid stimulus	38	4	5	0.89272
GO:0048545	response to steroid hormone	38	4	5	0.89272
GO:0071383	cellular response to steroid hormone stimulus	38	4	5	0.89272
GO:0010557	positive regulation of macromolecule biosynthetic process	245	24	32.27	0.89285
GO:0010468	regulation of gene expression	1477	147	194.52	0.89421
GO:0010107	potassium ion import	10	0	1.32	0.89435
GO:0007135	meiosis II	9	1	1.19	0.89436
GO:0006412	translation	833	34	109.7	0.8948
GO:0043413	macromolecule glycosylation	159	10	20.94	0.89491
GO:0009101	glycoprotein biosynthetic process	159	10	20.94	0.89491
GO:0006486	protein glycosylation	159	10	20.94	0.89491
GO:0007033	vacuole organization	39	5	5.14	0.8951
GO:0015976	carbon utilization	7	0	0.92	0.89542
GO:0010150	leaf senescence	25	3	3.29	0.89557
GO:0009900	dehiscence	10	1	1.32	0.89559
GO:0008652	cellular amino acid biosynthetic process	505	60	66.51	0.89561
GO:1902580	single-organism cellular localization	269	18	35.43	0.89712
GO:1902578	single-organism localization	269	18	35.43	0.89712
GO:0006355	regulation of transcription, DNA-templated	1267	133	166.86	0.89732
GO:0032879	regulation of localization	141	10	18.57	0.89843
GO:0006566	threonine metabolic process	14	1	1.84	0.89849
GO:0043170	macromolecule metabolic process	7647	842	1007.09	0.899
GO:0046351	disaccharide biosynthetic process	46	5	6.06	0.8993
GO:0006900	membrane budding	13	2	1.71	0.89989
GO:0006901	vesicle coating	13	2	1.71	0.89989
GO:0009066	aspartate family amino acid metabolic process	132	16	17.38	0.89994
GO:0044238	primary metabolic process	10522	1285	1385.72	0.90012
GO:0031328	positive regulation of cellular biosynthetic process	249	24	32.79	0.90016
GO:0051656	establishment of organelle localization	85	8	11.19	0.90018
GO:0042773	ATP synthesis coupled electron transport	22	0	2.9	0.90068
GO:0006119	oxidative phosphorylation	22	0	2.9	0.90068
GO:0044248	cellular catabolic process	1535	166	202.16	0.9025
GO:0090056	regulation of chlorophyll metabolic process	11	0	1.45	0.90292
GO:0090351	seedling development	114	6	15.01	0.90308
GO:0006450	regulation of translational fidelity	13	0	1.71	0.90377
GO:0018208	peptidyl-proline modification	71	0	9.35	0.90392
GO:0006665	sphingolipid metabolic process	44	4	5.79	0.9041
GO:0046907	intracellular transport	931	57	122.61	0.90413
GO:0055085	transmembrane transport	1089	135	143.42	0.90419
GO:0034654	nucleobase-containing compound biosynthetic process	1870	184	246.27	0.90487
GO:0000919	cell plate assembly	8	0	1.05	0.90501
GO:0052541	plant-type cell wall cellulose metabolic process	10	1	1.32	0.90502
GO:0016482	cytoplasmic transport	530	24	69.8	0.9051
GO:2001141	regulation of RNA biosynthetic process	1269	134	167.12	0.90526
GO:0006139	nucleobase-containing compound metabolic process	4433	391	583.81	0.90537
GO:0046520	sphingoid biosynthetic process	16	2	2.11	0.90553
GO:0006725	cellular aromatic compound metabolic process	4961	474	653.35	0.90729
GO:0035303	regulation of dephosphorylation	72	4	9.48	0.90755
GO:0034660	ncRNA metabolic process	421	22	55.44	0.90766
GO:0034613	cellular protein localization	740	36	97.46	0.90943
GO:0051235	maintenance of location	71	2	9.35	0.90992
GO:0010119	regulation of stomatal movement	35	3	4.61	0.91094
GO:0043604	amide biosynthetic process	22	0	2.9	0.91119
GO:0048523	negative regulation of cellular process	398	28	52.42	0.91167
GO:0006605	protein targeting	541	25	71.25	0.91197
GO:0044702	single organism reproductive process	963	110	126.82	0.91201
GO:0043269	regulation of ion transport	104	9	13.7	0.91202
GO:0022603	regulation of anatomical structure morphogenesis	86	13	11.33	0.91214
GO:0009653	anatomical structure morphogenesis	911	118	119.98	0.9134
GO:0048571	long-day photoperiodism	9	0	1.19	0.91435
GO:0046836	glycolipid transport	8	1	1.05	0.91471
GO:0035304	regulation of protein dephosphorylation	69	4	9.09	0.91515
GO:0051650	establishment of vesicle localization	6	1	0.79	0.91519
GO:0051648	vesicle localization	6	1	0.79	0.91519
GO:1990066	energy quenching	8	0	1.05	0.91532
GO:0010196	nonphotochemical quenching	8	0	1.05	0.91532
GO:1902531	regulation of intracellular signal transduction	180	21	23.71	0.91534
GO:0007034	vacuolar transport	110	4	14.49	0.91593
GO:1901699	cellular response to nitrogen compound	75	6	9.88	0.91631
GO:0006081	cellular aldehyde metabolic process	258	18	33.98	0.91661
GO:0016558	protein import into peroxisome matrix	78	2	10.27	0.91738
GO:0009893	positive regulation of metabolic process	396	47	52.15	0.91742
GO:0048316	seed development	412	38	54.26	0.91771
GO:0045165	cell fate commitment	43	6	5.66	0.91853
GO:0010100	negative regulation of photomorphogenesis	8	0	1.05	0.91885
GO:0006733	oxidoreduction coenzyme metabolic process	230	19	30.29	0.91892
GO:0032386	regulation of intracellular transport	8	0	1.05	0.91933
GO:0009082	branched-chain amino acid biosynthetic process	16	0	2.11	0.91942
GO:0008643	carbohydrate transport	129	15	16.99	0.92005
GO:0051049	regulation of transport	119	9	15.67	0.92015
GO:1901135	carbohydrate derivative metabolic process	1328	144	174.89	0.92066
GO:0009695	jasmonic acid biosynthetic process	63	7	8.3	0.92076
GO:0010155	regulation of proton transport	42	4	5.53	0.92172
GO:0090467	arginine import	7	1	0.92	0.92175
GO:0043091	L-arginine import	7	1	0.92	0.92175
GO:0043092	L-amino acid import	7	1	0.92	0.92175
GO:1902023	L-arginine transport	7	1	0.92	0.92175
GO:0042026	protein refolding	12	1	1.58	0.92193
GO:0031327	negative regulation of cellular biosynthetic process	179	16	23.57	0.92212
GO:0018205	peptidyl-lysine modification	69	2	9.09	0.92357
GO:0046519	sphingoid metabolic process	17	2	2.24	0.92365
GO:0046466	membrane lipid catabolic process	7	0	0.92	0.92409
GO:0030149	sphingolipid catabolic process	7	0	0.92	0.92409
GO:0009556	microsporogenesis	23	3	3.03	0.92469
GO:0010030	positive regulation of seed germination	9	0	1.19	0.92488
GO:1901070	guanosine-containing compound biosynthetic process	7	0	0.92	0.92535
GO:0031324	negative regulation of cellular metabolic process	219	20	28.84	0.92597
GO:0006189	'de novo' IMP biosynthetic process	11	0	1.45	0.92621
GO:0009965	leaf morphogenesis	126	14	16.59	0.92657
GO:0036211	protein modification process	2393	307	315.15	0.92676
GO:0006464	cellular protein modification process	2393	307	315.15	0.92676
GO:0009960	endosperm development	7	0	0.92	0.92705
GO:0009920	cell plate formation involved in plant-type cell wall biogenesis	6	0	0.79	0.92789
GO:0006914	autophagy	47	1	6.19	0.92789
GO:0090333	regulation of stomatal closure	7	0	0.92	0.92882
GO:0015996	chlorophyll catabolic process	53	3	6.98	0.92925
GO:0046149	pigment catabolic process	53	3	6.98	0.92925
GO:0040008	regulation of growth	176	40	23.18	0.92931
GO:0010038	response to metal ion	425	49	55.97	0.92944
GO:0010109	regulation of photosynthesis	14	0	1.84	0.92958
GO:0051253	negative regulation of RNA metabolic process	164	16	21.6	0.92995
GO:0045892	negative regulation of transcription, DNA-templated	164	16	21.6	0.92995
GO:1902679	negative regulation of RNA biosynthetic process	164	16	21.6	0.92995
GO:0034641	cellular nitrogen compound metabolic process	4794	429	631.36	0.93027
GO:0015980	energy derivation by oxidation of organic compounds	128	11	16.86	0.93029
GO:0030001	metal ion transport	487	56	64.14	0.93219
GO:0051173	positive regulation of nitrogen compound metabolic process	225	23	29.63	0.93222
GO:0009292	genetic transfer	13	0	1.71	0.93301
GO:0009294	DNA mediated transformation	13	0	1.71	0.93301
GO:0006909	phagocytosis	6	0	0.79	0.93314
GO:0032502	developmental process	2292	276	301.85	0.93369
GO:1902600	hydrogen ion transmembrane transport	63	4	8.3	0.93379
GO:0009880	embryonic pattern specification	29	4	3.82	0.93383
GO:0006498	N-terminal protein lipidation	64	4	8.43	0.93478
GO:0006499	N-terminal protein myristoylation	64	4	8.43	0.93478
GO:0018377	protein myristoylation	64	4	8.43	0.93478
GO:0009970	cellular response to sulfate starvation	6	0	0.79	0.93571
GO:0005982	starch metabolic process	168	20	22.13	0.93572
GO:0010078	maintenance of root meristem identity	9	0	1.19	0.93655
GO:0015995	chlorophyll biosynthetic process	103	5	13.56	0.93695
GO:0046471	phosphatidylglycerol metabolic process	49	3	6.45	0.93699
GO:0006655	phosphatidylglycerol biosynthetic process	49	3	6.45	0.93699
GO:0019220	regulation of phosphate metabolic process	325	37	42.8	0.93734
GO:0051174	regulation of phosphorus metabolic process	325	37	42.8	0.93734
GO:0009790	embryo development	403	36	53.07	0.93739
GO:0007005	mitochondrion organization	100	5	13.17	0.93864
GO:0048827	phyllome development	424	59	55.84	0.93892
GO:0044265	cellular macromolecule catabolic process	450	28	59.26	0.93906
GO:0051186	cofactor metabolic process	564	48	74.28	0.93911
GO:0048268	clathrin coat assembly	12	1	1.58	0.94003
GO:0051172	negative regulation of nitrogen compound metabolic process	172	17	22.65	0.94153
GO:0006821	chloride transport	12	1	1.58	0.94169
GO:0045934	negative regulation of nucleobase-containing compound metabolic process	171	17	22.52	0.94186
GO:0031325	positive regulation of cellular metabolic process	375	42	49.39	0.94187
GO:0034645	cellular macromolecule biosynthetic process	3190	281	420.11	0.94227
GO:0015931	nucleobase-containing compound transport	132	9	17.38	0.94281
GO:0048598	embryonic morphogenesis	11	0	1.45	0.94437
GO:0006623	protein targeting to vacuole	99	4	13.04	0.94518
GO:0072665	protein localization to vacuole	99	4	13.04	0.94518
GO:0072666	establishment of protein localization to vacuole	99	4	13.04	0.94518
GO:0044723	single-organism carbohydrate metabolic process	1212	164	159.62	0.94526
GO:0019637	organophosphate metabolic process	1448	156	190.7	0.94532
GO:0072594	establishment of protein localization to organelle	409	12	53.86	0.94536
GO:0006644	phospholipid metabolic process	398	40	52.42	0.94555
GO:0070727	cellular macromolecule localization	754	38	99.3	0.94562
GO:0044070	regulation of anion transport	27	2	3.56	0.94606
GO:0051181	cofactor transport	9	0	1.19	0.94629
GO:0051254	positive regulation of RNA metabolic process	219	23	28.84	0.94654
GO:1902680	positive regulation of RNA biosynthetic process	219	23	28.84	0.94654
GO:0033014	tetrapyrrole biosynthetic process	142	6	18.7	0.9466
GO:0010604	positive regulation of macromolecule metabolic process	367	43	48.33	0.94668
GO:0009240	isopentenyl diphosphate biosynthetic process	181	10	23.84	0.94699
GO:0046490	isopentenyl diphosphate metabolic process	181	10	23.84	0.94699
GO:0042793	transcription from plastid promoter	56	4	7.38	0.94738
GO:0019682	glyceraldehyde-3-phosphate metabolic process	180	10	23.71	0.94754
GO:0006779	porphyrin-containing compound biosynthetic process	139	6	18.31	0.94771
GO:0032774	RNA biosynthetic process	1573	161	207.16	0.94781
GO:0016052	carbohydrate catabolic process	510	57	67.17	0.94782
GO:0051701	interaction with host	46	0	6.06	0.94789
GO:0019288	isopentenyl diphosphate biosynthetic process, methylerythritol 4-phosphate pathway	179	10	23.57	0.94808
GO:0018193	peptidyl-amino acid modification	176	6	23.18	0.9485
GO:0080110	sporopollenin biosynthetic process	7	1	0.92	0.94891
GO:0006351	transcription, DNA-templated	1569	160	206.63	0.94907
GO:0006812	cation transport	767	88	101.01	0.94921
GO:0006869	lipid transport	82	9	10.8	0.94962
GO:0009987	cellular process	12796	1521	1685.2	0.94994
GO:0006560	proline metabolic process	16	2	2.11	0.95042
GO:0052543	callose deposition in cell wall	24	2	3.16	0.95063
GO:0071806	protein transmembrane transport	122	5	16.07	0.95065
GO:0065002	intracellular protein transmembrane transport	122	5	16.07	0.95065
GO:0010638	positive regulation of organelle organization	100	13	13.17	0.95086
GO:0009059	macromolecule biosynthetic process	3237	303	426.3	0.95186
GO:0044743	intracellular protein transmembrane import	118	5	15.54	0.95224
GO:0005996	monosaccharide metabolic process	423	40	55.71	0.95265
GO:0010014	meristem initiation	102	12	13.43	0.95283
GO:0046483	heterocycle metabolic process	4793	427	631.23	0.95293
GO:0051817	modification of morphology or physiology of other organism involved in symbiotic interaction	41	0	5.4	0.95343
GO:0044003	modification by symbiont of host morphology or physiology	41	0	5.4	0.95343
GO:1901575	organic substance catabolic process	1900	219	250.23	0.95351
GO:0070925	organelle assembly	31	3	4.08	0.95368
GO:0006259	DNA metabolic process	1181	77	155.53	0.95386
GO:0031349	positive regulation of defense response	27	1	3.56	0.95415
GO:0043467	regulation of generation of precursor metabolites and energy	9	0	1.19	0.95416
GO:0042548	regulation of photosynthesis, light reaction	9	0	1.19	0.95416
GO:0007015	actin filament organization	116	15	15.28	0.95433
GO:0051641	cellular localization	1134	83	149.34	0.95442
GO:0009106	lipoate metabolic process	31	3	4.08	0.95454
GO:0090421	embryonic meristem initiation	37	3	4.87	0.95481
GO:0001666	response to hypoxia	29	2	3.82	0.95486
GO:0036293	response to decreased oxygen levels	29	2	3.82	0.95486
GO:0070482	response to oxygen levels	29	2	3.82	0.95486
GO:0051273	beta-glucan metabolic process	148	32	19.49	0.95503
GO:0019538	protein metabolic process	4253	484	560.11	0.95513
GO:0006074	(1->3)-beta-D-glucan metabolic process	17	2	2.24	0.95532
GO:0006075	(1->3)-beta-D-glucan biosynthetic process	17	2	2.24	0.95532
GO:0071702	organic substance transport	1373	136	180.82	0.95588
GO:0010628	positive regulation of gene expression	216	23	28.45	0.95615
GO:0045893	positive regulation of transcription, DNA-templated	216	23	28.45	0.95615
GO:0019216	regulation of lipid metabolic process	33	1	4.35	0.95775
GO:0009835	fruit ripening	13	2	1.71	0.95877
GO:0071695	anatomical structure maturation	13	2	1.71	0.95877
GO:0031365	N-terminal protein amino acid modification	65	4	8.56	0.95921
GO:0006814	sodium ion transport	39	2	5.14	0.95962
GO:0045037	protein import into chloroplast stroma	13	1	1.71	0.95964
GO:0045935	positive regulation of nucleobase-containing compound metabolic process	222	23	29.24	0.96002
GO:0032957	inositol trisphosphate metabolic process	15	1	1.98	0.96026
GO:0009817	defense response to fungus, incompatible interaction	29	3	3.82	0.96071
GO:0072337	modified amino acid transport	6	0	0.79	0.96178
GO:0048640	negative regulation of developmental growth	6	1	0.79	0.96267
GO:0050790	regulation of catalytic activity	487	84	64.14	0.96345
GO:0031333	negative regulation of protein complex assembly	9	1	1.19	0.96374
GO:0032272	negative regulation of protein polymerization	9	1	1.19	0.96374
GO:0043242	negative regulation of protein complex disassembly	9	0	1.19	0.96374
GO:1901880	negative regulation of protein depolymerization	9	0	1.19	0.96374
GO:0006777	Mo-molybdopterin cofactor biosynthetic process	10	1	1.32	0.96414
GO:0043545	molybdopterin cofactor metabolic process	10	1	1.32	0.96414
GO:0019720	Mo-molybdopterin cofactor metabolic process	10	1	1.32	0.96414
GO:0032324	molybdopterin cofactor biosynthetic process	10	1	1.32	0.96414
GO:0051189	prosthetic group metabolic process	10	1	1.32	0.96414
GO:0048518	positive regulation of biological process	624	70	82.18	0.96468
GO:0009934	regulation of meristem structural organization	12	2	1.58	0.9649
GO:0030148	sphingolipid biosynthetic process	21	2	2.77	0.96523
GO:1901069	guanosine-containing compound catabolic process	227	20	29.9	0.96588
GO:0006184	GTP catabolic process	227	20	29.9	0.96588
GO:0010154	fruit development	447	41	58.87	0.96635
[truncated: 320 more rows]

## Sheet: RPvsNP
The DEGs of RPvsNP Significantly enriched in GO terms
GO.ID	Term	Annotated	Significant	Expected	KS
GO:0010200	response to chitin	114	33	9.97	2.3e-05
GO:0006032	chitin catabolic process	29	13	2.54	0.00014
GO:0019419	sulfate reduction	6	4	0.52	0.00114
GO:0009693	ethylene biosynthetic process	52	16	4.55	0.00119
GO:0006535	cysteine biosynthetic process from serine	19	1	1.66	0.00136
GO:0002679	respiratory burst involved in defense response	31	12	2.71	0.00144
GO:0006290	pyrimidine dimer repair	8	0	0.7	0.00157
GO:0018202	peptidyl-histidine modification	14	1	1.22	0.00199
GO:0052542	defense response by callose deposition	38	13	3.32	0.0026
GO:0016310	phosphorylation	1935	208	169.24	0.00298
GO:0006855	drug transmembrane transport	80	12	7	0.00401
GO:0009089	lysine biosynthetic process via diaminopimelate	25	0	2.19	0.00414
GO:1901700	response to oxygen-containing compound	1140	154	99.71	0.00452
GO:0072503	cellular divalent inorganic cation homeostasis	24	3	2.1	0.00476
GO:0042559	pteridine-containing compound biosynthetic process	39	3	3.41	0.00547
GO:0010213	non-photoreactive DNA repair	6	0	0.52	0.00568
GO:0006294	nucleotide-excision repair, preincision complex assembly	6	0	0.52	0.00568
GO:0070588	calcium ion transmembrane transport	28	5	2.45	0.00635
GO:0009626	plant-type hypersensitive response	149	29	13.03	0.00681
GO:0019725	cellular homeostasis	247	28	21.6	0.00685
GO:0045088	regulation of innate immune response	158	29	13.82	0.00758
GO:0006614	SRP-dependent cotranslational protein targeting to membrane	18	0	1.57	0.00869
GO:0005976	polysaccharide metabolic process	627	88	54.84	0.00883
GO:0015850	organic hydroxy compound transport	10	5	0.87	0.00889
GO:0009962	regulation of flavonoid biosynthetic process	28	3	2.45	0.00935
GO:0009611	response to wounding	162	32	14.17	0.00965
GO:0010363	regulation of plant-type hypersensitive response	130	25	11.37	0.01084
GO:0010941	regulation of cell death	155	27	13.56	0.01106
GO:0009396	folic acid-containing compound biosynthetic process	35	2	3.06	0.01164
GO:0018106	peptidyl-histidine phosphorylation	10	1	0.87	0.01178
GO:0035967	cellular response to topologically incorrect protein	62	15	5.42	0.01351
GO:0034620	cellular response to unfolded protein	62	15	5.42	0.01351
GO:0006986	response to unfolded protein	62	15	5.42	0.01351
GO:0030968	endoplasmic reticulum unfolded protein response	62	15	5.42	0.01351
GO:0006468	protein phosphorylation	1332	150	116.5	0.01418
GO:0006421	asparaginyl-tRNA aminoacylation	7	0	0.61	0.01437
GO:0007018	microtubule-based movement	76	6	6.65	0.01443
GO:0060548	negative regulation of cell death	81	17	7.08	0.01539
GO:0016122	xanthophyll metabolic process	9	0	0.79	0.01682
GO:0035445	borate transmembrane transport	9	4	0.79	0.0169
GO:0046713	borate transport	9	4	0.79	0.0169
GO:0016998	cell wall macromolecule catabolic process	41	12	3.59	0.01691
GO:0015749	monosaccharide transport	10	3	0.87	0.01886
GO:0080135	regulation of cellular response to stress	137	25	11.98	0.01921
GO:0006875	cellular metal ion homeostasis	50	5	4.37	0.01921
GO:0031668	cellular response to extracellular stimulus	116	14	10.15	0.02026
GO:0071496	cellular response to external stimulus	116	14	10.15	0.02026
GO:0042537	benzene-containing compound metabolic process	98	13	8.57	0.0203
GO:0006760	folic acid-containing compound metabolic process	54	3	4.72	0.02041
GO:0009991	response to extracellular stimulus	119	14	10.41	0.0206
GO:0010185	regulation of cellular defense response	7	2	0.61	0.02196
GO:0006968	cellular defense response	7	2	0.61	0.02196
GO:0006984	ER-nucleus signaling pathway	71	15	6.21	0.0226
GO:0055065	metal ion homeostasis	63	5	5.51	0.02291
GO:0045454	cell redox homeostasis	139	19	12.16	0.02304
GO:0080158	chloroplast ribulose bisphosphate carboxylase complex biogenesis	7	0	0.61	0.02327
GO:0043650	dicarboxylic acid biosynthetic process	22	2	1.92	0.02339
GO:0009560	embryo sac egg cell differentiation	72	1	6.3	0.02428
GO:0007292	female gamete generation	72	1	6.3	0.02428
GO:0048449	floral organ formation	91	8	7.96	0.02447
GO:0022403	cell cycle phase	56	2	4.9	0.02463
GO:0010388	cullin deneddylation	56	2	4.9	0.02463
GO:0044848	biological phase	56	2	4.9	0.02463
GO:0000085	mitotic G2 phase	56	2	4.9	0.02463
GO:0051325	interphase	56	2	4.9	0.02463
GO:0051329	mitotic interphase	56	2	4.9	0.02463
GO:0051319	G2 phase	56	2	4.9	0.02463
GO:0000338	protein deneddylation	56	2	4.9	0.02463
GO:0043067	regulation of programmed cell death	147	26	12.86	0.025
GO:0009561	megagametogenesis	100	3	8.75	0.02632
GO:0015669	gas transport	7	1	0.61	0.02655
GO:0006890	retrograde vesicle-mediated transport, Golgi to ER	11	1	0.96	0.02659
GO:0009751	response to salicylic acid	144	19	12.59	0.02678
GO:0009685	gibberellin metabolic process	36	5	3.15	0.02725
GO:0009620	response to fungus	234	37	20.47	0.02738
GO:0009414	response to water deprivation	204	34	17.84	0.02786
GO:0015824	proline transport	37	10	3.24	0.02838
GO:0009423	chorismate biosynthetic process	10	0	0.87	0.02968
GO:0000272	polysaccharide catabolic process	120	24	10.5	0.03139
GO:1901419	regulation of response to alcohol	26	2	2.27	0.03158
GO:0042631	cellular response to water deprivation	27	5	2.36	0.03256
GO:0071462	cellular response to water stimulus	27	5	2.36	0.03256
GO:0016101	diterpenoid metabolic process	43	6	3.76	0.03301
GO:0010092	specification of organ identity	10	3	0.87	0.03344
GO:0010093	specification of floral organ identity	10	3	0.87	0.03344
GO:0007166	cell surface receptor signaling pathway	134	14	11.72	0.03402
GO:0006874	cellular calcium ion homeostasis	12	1	1.05	0.03402
GO:0055074	calcium ion homeostasis	12	1	1.05	0.03402
GO:0048453	sepal formation	19	0	1.66	0.03428
GO:0048447	sepal morphogenesis	19	0	1.66	0.03428
GO:0015671	oxygen transport	6	1	0.52	0.03497
GO:0050832	defense response to fungus	149	26	13.03	0.03568
GO:0009753	response to jasmonic acid	161	26	14.08	0.03618
GO:0009696	salicylic acid metabolic process	63	10	5.51	0.0365
GO:0009415	response to water	212	34	18.54	0.03717
GO:0010158	abaxial cell fate specification	6	2	0.52	0.03726
GO:0001101	response to acid chemical	646	85	56.5	0.03734
GO:0006612	protein targeting to membrane	158	25	13.82	0.03785
GO:0010143	cutin biosynthetic process	8	4	0.7	0.03916
GO:0034308	primary alcohol metabolic process	10	0	0.87	0.03928
GO:0051645	Golgi localization	15	1	1.31	0.04001
GO:0060151	peroxisome localization	15	1	1.31	0.04001
GO:0015804	neutral amino acid transport	40	10	3.5	0.04031
GO:0071918	urea transmembrane transport	9	4	0.79	0.04038
GO:0015840	urea transport	9	4	0.79	0.04038
GO:0040020	regulation of meiosis	7	2	0.61	0.04057
GO:0009787	regulation of abscisic acid-activated signaling pathway	25	2	2.19	0.04059
GO:0009725	response to hormone	817	100	71.46	0.04133
GO:0051503	adenine nucleotide transport	10	0	0.87	0.04163
GO:0006661	phosphatidylinositol biosynthetic process	75	5	6.56	0.04238
GO:0008645	hexose transport	6	2	0.52	0.04293
GO:0015819	lysine transport	6	1	0.52	0.04359
GO:0009697	salicylic acid biosynthetic process	61	10	5.34	0.04403
GO:0071941	nitrogen cycle metabolic process	20	2	1.75	0.04454
GO:0010229	inflorescence development	34	6	2.97	0.04477
GO:0071705	nitrogen compound transport	434	57	37.96	0.0459
GO:0043069	negative regulation of programmed cell death	76	16	6.65	0.04614
GO:0015865	purine nucleotide transport	17	2	1.49	0.04623
GO:0046488	phosphatidylinositol metabolic process	123	8	10.76	0.04631
GO:0044036	cell wall macromolecule metabolic process	220	31	19.24	0.04703
GO:0048284	organelle fusion	36	1	3.15	0.04939
GO:0055069	zinc ion homeostasis	14	2	1.22	0.04999
GO:0017148	negative regulation of translation	10	0	0.87	0.05024
GO:0044264	cellular polysaccharide metabolic process	486	63	42.51	0.05147
GO:0045490	pectin catabolic process	49	9	4.29	0.05225
GO:0009065	glutamine family amino acid catabolic process	18	4	1.57	0.05262
GO:0016570	histone modification	255	11	22.3	0.0547
GO:0046482	para-aminobenzoic acid metabolic process	22	1	1.92	0.05538
GO:0010647	positive regulation of cell communication	28	3	2.45	0.05661
GO:0016569	covalent chromatin modification	277	12	24.23	0.05662
GO:0046417	chorismate metabolic process	21	1	1.84	0.0567
GO:0006730	one-carbon metabolic process	53	2	4.64	0.05675
GO:0019755	one-carbon compound transport	10	4	0.87	0.05756
GO:0002683	negative regulation of immune system process	6	0	0.52	0.0613
GO:0098656	anion transmembrane transport	84	14	7.35	0.06197
GO:0006865	amino acid transport	179	30	15.66	0.06398
GO:0044262	cellular carbohydrate metabolic process	631	77	55.19	0.06408
GO:0031407	oxylipin metabolic process	43	5	3.76	0.06453
GO:0000741	karyogamy	35	1	3.06	0.06566
GO:0006928	cellular component movement	98	6	8.57	0.06712
GO:0048645	organ formation	117	12	10.23	0.06728
GO:0031408	oxylipin biosynthetic process	41	5	3.59	0.06743
GO:0043101	purine-containing compound salvage	7	0	0.61	0.07033
GO:0009408	response to heat	165	24	14.43	0.07035
GO:0051646	mitochondrion localization	16	1	1.4	0.07316
GO:0006882	cellular zinc ion homeostasis	13	2	1.14	0.07443
GO:0010224	response to UV-B	51	7	4.46	0.07537
GO:0006073	cellular glucan metabolic process	377	49	32.97	0.0759
GO:0044042	glucan metabolic process	377	49	32.97	0.0759
GO:0006662	glycerol ether metabolic process	49	9	4.29	0.07669
GO:0043462	regulation of ATPase activity	9	0	0.79	0.07732
GO:1903289	regulation of ATP catabolic process	9	0	0.79	0.07732
GO:0031669	cellular response to nutrient levels	97	13	8.48	0.07826
GO:0009269	response to desiccation	36	8	3.15	0.07873
GO:0006979	response to oxidative stress	423	48	37	0.08068
GO:0009247	glycolipid biosynthetic process	70	7	6.12	0.08188
GO:0009719	response to endogenous stimulus	882	121	77.14	0.0822
GO:0031425	chloroplast RNA processing	7	0	0.61	0.08286
GO:0046460	neutral lipid biosynthetic process	10	0	0.87	0.08294
GO:0046463	acylglycerol biosynthetic process	10	0	0.87	0.08294
GO:0019432	triglyceride biosynthetic process	10	0	0.87	0.08294
GO:0022412	cellular process involved in reproduction in multicellular organism	79	2	6.91	0.08301
GO:0009800	cinnamic acid biosynthetic process	14	2	1.22	0.08449
GO:0009803	cinnamic acid metabolic process	14	2	1.22	0.08449
GO:0006354	DNA-templated transcription, elongation	47	4	4.11	0.08527
GO:0010338	leaf formation	6	1	0.52	0.08598
GO:0009610	response to symbiotic fungus	13	1	1.14	0.08609
GO:0000724	double-strand break repair via homologous recombination	45	2	3.94	0.08628
GO:0000725	recombinational repair	45	2	3.94	0.08628
GO:0006558	L-phenylalanine metabolic process	27	4	2.36	0.08736
GO:1902221	erythrose 4-phosphate/phosphoenolpyruvate family amino acid metabolic process	27	4	2.36	0.08736
GO:0018904	ether metabolic process	50	9	4.37	0.08741
GO:0048444	floral organ morphogenesis	100	8	8.75	0.08773
GO:0048563	post-embryonic organ morphogenesis	100	8	8.75	0.08773
GO:0031667	response to nutrient levels	98	13	8.57	0.0885
GO:0048464	flower calyx development	23	0	2.01	0.0888
GO:0048442	sepal development	23	0	2.01	0.0888
GO:0010394	homogalacturonan metabolic process	6	0	0.52	0.08983
GO:0010289	homogalacturonan biosynthetic process	6	0	0.52	0.08983
GO:0009411	response to UV	124	15	10.85	0.09025
GO:1901701	cellular response to oxygen-containing compound	416	41	36.38	0.09106
GO:0030259	lipid glycosylation	16	2	1.4	0.09508
GO:0034050	host programmed cell death induced by symbiont	157	30	13.73	0.09621
GO:0035235	ionotropic glutamate receptor signaling pathway	19	1	1.66	0.09637
GO:0007215	glutamate receptor signaling pathway	19	1	1.66	0.09637
GO:0006559	L-phenylalanine catabolic process	16	2	1.4	0.09652
GO:1902222	erythrose 4-phosphate/phosphoenolpyruvate family amino acid catabolic process	16	2	1.4	0.09652
GO:0018298	protein-chromophore linkage	9	0	0.79	0.09689
GO:0090150	establishment of protein localization to membrane	177	25	15.48	0.09721
GO:0072657	protein localization to membrane	177	25	15.48	0.09721
GO:0006094	gluconeogenesis	111	8	9.71	0.09728
GO:0009963	positive regulation of flavonoid biosynthetic process	18	1	1.57	0.09984
GO:0045185	maintenance of protein location	26	4	2.27	0.10056
GO:0006506	GPI anchor biosynthetic process	16	1	1.4	0.10132
GO:0006820	anion transport	451	61	39.44	0.10222
GO:0023056	positive regulation of signaling	25	3	2.19	0.10225
GO:0009967	positive regulation of signal transduction	25	3	2.19	0.10225
GO:0046916	cellular transition metal ion homeostasis	32	3	2.8	0.10227
GO:0007186	G-protein coupled receptor signaling pathway	42	5	3.67	0.10256
GO:0031537	regulation of anthocyanin metabolic process	18	3	1.57	0.10308
GO:0010252	auxin homeostasis	12	2	1.05	0.10414
GO:0015867	ATP transport	9	0	0.79	0.10451
GO:0015868	purine ribonucleotide transport	9	0	0.79	0.10451
GO:0009862	systemic acquired resistance, salicylic acid mediated signaling pathway	58	7	5.07	0.10526
GO:0007163	establishment or maintenance of cell polarity	6	0	0.52	0.10605
GO:0046900	tetrahydrofolylpolyglutamate metabolic process	8	0	0.7	0.10672
GO:0046901	tetrahydrofolylpolyglutamate biosynthetic process	8	0	0.7	0.10672
GO:0010286	heat acclimation	34	8	2.97	0.10676
GO:0016568	chromatin modification	300	12	26.24	0.10766
GO:0033587	shikimate biosynthetic process	10	0	0.87	0.1091
GO:0010358	leaf shaping	6	1	0.52	0.11001
GO:0009152	purine ribonucleotide biosynthetic process	85	4	7.43	0.11061
GO:0031540	regulation of anthocyanin biosynthetic process	7	2	0.61	0.11469
GO:0015698	inorganic anion transport	188	29	16.44	0.11578
GO:0071446	cellular response to salicylic acid stimulus	103	15	9.01	0.11627
GO:0009863	salicylic acid mediated signaling pathway	103	15	9.01	0.11627
GO:0009735	response to cytokinin	53	7	4.64	0.11719
GO:0016444	somatic cell DNA recombination	21	2	1.84	0.11931
GO:0080167	response to karrikin	85	15	7.43	0.12026
GO:0010731	protein glutathionylation	6	2	0.52	0.12073
GO:0009313	oligosaccharide catabolic process	9	1	0.79	0.12134
GO:0015706	nitrate transport	67	13	5.86	0.12144
GO:0071577	zinc ion transmembrane transport	13	4	1.14	0.12243
GO:0055071	manganese ion homeostasis	6	0	0.52	0.12245
GO:0010583	response to cyclopentenone	43	7	3.76	0.12454
GO:0009608	response to symbiont	14	1	1.22	0.12567
GO:0009956	radial pattern formation	9	2	0.79	0.12757
GO:0014070	response to organic cyclic compound	326	35	28.51	0.12779
GO:0071702	organic substance transport	1373	124	120.08	0.12879
GO:0043562	cellular response to nitrogen levels	7	3	0.61	0.13066
GO:0006995	cellular response to nitrogen starvation	7	3	0.61	0.13066
GO:0006772	thiamine metabolic process	12	0	1.05	0.1308
GO:0042723	thiamine-containing compound metabolic process	12	0	1.05	0.1308
GO:0055076	transition metal ion homeostasis	44	3	3.85	0.13148
GO:0006664	glycolipid metabolic process	84	7	7.35	0.13153
GO:0009267	cellular response to starvation	94	12	8.22	0.13186
GO:0009636	response to toxic substance	17	1	1.49	0.13204
GO:0072330	monocarboxylic acid biosynthetic process	420	44	36.73	0.13208
GO:0006122	mitochondrial electron transport, ubiquinol to cytochrome c	10	0	0.87	0.13222
GO:0031348	negative regulation of defense response	87	13	7.61	0.13316
GO:0009873	ethylene-activated signaling pathway	49	9	4.29	0.13321
GO:0071369	cellular response to ethylene stimulus	49	9	4.29	0.13321
GO:1901421	positive regulation of response to alcohol	12	2	1.05	0.13335
GO:0019319	hexose biosynthetic process	113	8	9.88	0.13403
GO:0007276	gamete generation	90	2	7.87	0.13475
GO:0042542	response to hydrogen peroxide	145	20	12.68	0.13745
GO:2001057	reactive nitrogen species metabolic process	10	1	0.87	0.13781
GO:0042126	nitrate metabolic process	10	1	0.87	0.13781
GO:0042128	nitrate assimilation	10	1	0.87	0.13781
GO:0071310	cellular response to organic substance	573	58	50.11	0.1391
GO:0042398	cellular modified amino acid biosynthetic process	61	7	5.34	0.13915
GO:0010167	response to nitrate	54	11	4.72	0.13938
GO:0046654	tetrahydrofolate biosynthetic process	6	0	0.52	0.14122
GO:0046688	response to copper ion	14	2	1.22	0.14239
GO:0006099	tricarboxylic acid cycle	51	1	4.46	0.14436
GO:0052314	phytoalexin metabolic process	13	3	1.14	0.1452
GO:0052315	phytoalexin biosynthetic process	13	3	1.14	0.1452
GO:0007167	enzyme linked receptor protein signaling pathway	81	7	7.08	0.14597
GO:0010383	cell wall polysaccharide metabolic process	157	19	13.73	0.14653
GO:0043173	nucleotide salvage	19	0	1.66	0.14671
GO:0009584	detection of visible light	8	0	0.7	0.14694
GO:0015866	ADP transport	7	0	0.61	0.147
GO:0042594	response to starvation	95	12	8.31	0.14705
GO:0015851	nucleobase transport	15	3	1.31	0.14753
GO:0016115	terpenoid catabolic process	13	2	1.14	0.14906
GO:0008300	isoprenoid catabolic process	13	2	1.14	0.14906
GO:0006598	polyamine catabolic process	16	4	1.4	0.14918
GO:0070589	cellular component macromolecule biosynthetic process	103	12	9.01	0.14973
GO:0044038	cell wall macromolecule biosynthetic process	103	12	9.01	0.14973
GO:0052541	plant-type cell wall cellulose metabolic process	10	3	0.87	0.15068
GO:0009625	response to insect	16	4	1.4	0.15196
GO:0043410	positive regulation of MAPK cascade	8	1	0.7	0.15233
GO:0043406	positive regulation of MAP kinase activity	8	1	0.7	0.15233
GO:0071902	positive regulation of protein serine/threonine kinase activity	8	1	0.7	0.15233
GO:0000187	activation of MAPK activity	8	1	0.7	0.15233
GO:1902533	positive regulation of intracellular signal transduction	8	1	0.7	0.15233
GO:0006952	defense response	774	103	67.69	0.15389
GO:0009228	thiamine biosynthetic process	11	0	0.96	0.15497
GO:0042724	thiamine-containing compound biosynthetic process	11	0	0.96	0.15497
GO:0006892	post-Golgi vesicle-mediated transport	8	1	0.7	0.15498
GO:0006896	Golgi to vacuole transport	8	1	0.7	0.15498
GO:0009914	hormone transport	81	11	7.08	0.15672
GO:0060918	auxin transport	81	11	7.08	0.15672
GO:0023014	signal transduction by phosphorylation	270	39	23.61	0.15812
GO:0009640	photomorphogenesis	135	6	11.81	0.15862
GO:0006754	ATP biosynthetic process	52	4	4.55	0.15916
GO:0045493	xylan catabolic process	14	2	1.22	0.15966
GO:0010393	galacturonan metabolic process	79	14	6.91	0.16052
GO:0045488	pectin metabolic process	79	14	6.91	0.16052
GO:0030243	cellulose metabolic process	131	17	11.46	0.16097
GO:0032101	regulation of response to external stimulus	19	3	1.66	0.161
GO:0009686	gibberellin biosynthetic process	23	3	2.01	0.16213
GO:0016048	detection of temperature stimulus	8	0	0.7	0.16284
GO:0006862	nucleotide transport	66	8	5.77	0.16431
GO:0007169	transmembrane receptor protein tyrosine kinase signaling pathway	79	7	6.91	0.16471
GO:0070592	cell wall polysaccharide biosynthetic process	101	12	8.83	0.16489
GO:0010035	response to inorganic substance	820	93	71.72	0.16618
GO:0009595	detection of biotic stimulus	33	3	2.89	0.1664
GO:0046685	response to arsenic-containing substance	18	2	1.57	0.16644
GO:0018196	peptidyl-asparagine modification	7	1	0.61	0.16664
GO:0018279	protein N-linked glycosylation via asparagine	7	1	0.61	0.16664
GO:0036211	protein modification process	2393	214	209.29	0.16743
GO:0006464	cellular protein modification process	2393	214	209.29	0.16743
GO:0071214	cellular response to abiotic stimulus	80	10	7	0.17046
GO:0043255	regulation of carbohydrate biosynthetic process	7	1	0.61	0.17067
GO:0016575	histone deacetylation	18	3	1.57	0.17261
GO:0051651	maintenance of location in cell	24	4	2.1	0.17306
GO:0010022	meristem determinacy	9	0	0.79	0.17336
GO:0010582	floral meristem determinacy	9	0	0.79	0.17336
GO:0009789	positive regulation of abscisic acid-activated signaling pathway	11	2	0.96	0.17353
GO:0070887	cellular response to chemical stimulus	669	71	58.51	0.17394
GO:0030433	ER-associated ubiquitin-dependent protein catabolic process	9	1	0.79	0.17423
GO:0030488	tRNA methylation	11	0	0.96	0.17569
GO:0019722	calcium-mediated signaling	37	5	3.24	0.1757
GO:0051726	regulation of cell cycle	213	11	18.63	0.17613
GO:0015696	ammonium transport	48	8	4.2	0.17629
GO:0018958	phenol-containing compound metabolic process	70	10	6.12	0.17693
GO:0008033	tRNA processing	72	2	6.3	0.17788
GO:0046364	monosaccharide biosynthetic process	125	8	10.93	0.17893
GO:0046283	anthocyanin-containing compound metabolic process	37	4	3.24	0.18006
GO:0006505	GPI anchor metabolic process	25	1	2.19	0.18066
GO:0010337	regulation of salicylic acid metabolic process	8	0	0.7	0.1809
GO:0010410	hemicellulose metabolic process	137	15	11.98	0.18231
GO:0009168	purine ribonucleoside monophosphate biosynthetic process	76	4	6.65	0.18339
GO:0009127	purine nucleoside monophosphate biosynthetic process	76	4	6.65	0.18339
GO:0010033	response to organic substance	1309	146	114.49	0.18374
GO:0006950	response to stress	2489	268	217.69	0.18458
GO:0010235	guard mother cell cytokinesis	7	0	0.61	0.1855
GO:0006817	phosphate ion transport	36	5	3.15	0.18676
GO:0045787	positive regulation of cell cycle	10	0	0.87	0.1887
GO:0046271	phenylpropanoid catabolic process	47	5	4.11	0.18871
GO:0046942	carboxylic acid transport	218	31	19.07	0.18952
GO:0015849	organic acid transport	218	31	19.07	0.18952
GO:0019932	second-messenger-mediated signaling	41	5	3.59	0.19097
GO:1902930	regulation of alcohol biosynthetic process	7	0	0.61	0.19201
GO:0009607	response to biotic stimulus	743	81	64.98	0.19417
GO:0034976	response to endoplasmic reticulum stress	148	19	12.94	0.19452
GO:0010564	regulation of cell cycle process	87	6	7.61	0.19491
GO:0080134	regulation of response to stress	246	38	21.52	0.19566
GO:0009736	cytokinin-activated signaling pathway	27	4	2.36	0.19601
GO:0071368	cellular response to cytokinin stimulus	27	4	2.36	0.19601
GO:0018344	protein geranylgeranylation	9	0	0.79	0.19634
GO:0031347	regulation of defense response	235	38	20.55	0.19672
GO:0016246	RNA interference	80	2	7	0.19763
GO:0071229	cellular response to acid chemical	238	28	20.82	0.19786
GO:0006325	chromatin organization	392	17	34.28	0.19872
GO:0046786	viral replication complex formation and maintenance	10	0	0.87	0.19981
GO:0019079	viral genome replication	10	0	0.87	0.19981
GO:0045901	positive regulation of translational elongation	9	1	0.79	0.20125
GO:0045905	positive regulation of translational termination	9	1	0.79	0.20125
GO:0006452	translational frameshifting	9	1	0.79	0.20125
GO:0006449	regulation of translational termination	9	1	0.79	0.20125
GO:0072350	tricarboxylic acid metabolic process	14	2	1.22	0.20418
GO:0044283	small molecule biosynthetic process	1091	97	95.42	0.20448
GO:0046189	phenol-containing compound biosynthetic process	68	10	5.95	0.20557
GO:0016441	posttranscriptional gene silencing	103	3	9.01	0.20591
GO:0006102	isocitrate metabolic process	10	1	0.87	0.20603
GO:0009738	abscisic acid-activated signaling pathway	85	10	7.43	0.20715
GO:0016579	protein deubiquitination	29	2	2.54	0.20833
GO:0009718	anthocyanin-containing compound biosynthetic process	23	3	2.01	0.21104
GO:0042214	terpene metabolic process	54	5	4.72	0.21271
GO:0043631	RNA polyadenylation	16	0	1.4	0.21313
GO:0010065	primary meristem tissue development	8	1	0.7	0.21332
GO:0015695	organic cation transport	6	1	0.52	0.21522
GO:0009605	response to external stimulus	967	103	84.57	0.2164
GO:0006513	protein monoubiquitination	6	2	0.52	0.21664
GO:0016574	histone ubiquitination	6	2	0.52	0.21664
GO:0045730	respiratory burst	32	12	2.8	0.21705
GO:0035556	intracellular signal transduction	637	77	55.71	0.21744
GO:0043288	apocarotenoid metabolic process	16	0	1.4	0.21746
GO:0009687	abscisic acid metabolic process	16	0	1.4	0.21746
GO:1902644	tertiary alcohol metabolic process	16	0	1.4	0.21746
GO:0015711	organic anion transport	257	33	22.48	0.21748
GO:0016071	mRNA metabolic process	263	14	23	0.21853
GO:0035434	copper ion transmembrane transport	17	2	1.49	0.22053
GO:0000165	MAPK cascade	239	34	20.9	0.22107
GO:0052547	regulation of peptidase activity	11	0	0.96	0.22243
GO:0010466	negative regulation of peptidase activity	11	0	0.96	0.22243
GO:0030162	regulation of proteolysis	11	0	0.96	0.22243
GO:0015813	L-glutamate transport	9	1	0.79	0.22304
GO:0019310	inositol catabolic process	8	0	0.7	0.22351
GO:0006479	protein methylation	174	7	15.22	0.22492
GO:0008213	protein alkylation	174	7	15.22	0.22492
GO:0000024	maltose biosynthetic process	9	3	0.79	0.22578
GO:0048831	regulation of shoot system development	208	10	18.19	0.22602
GO:0006002	fructose 6-phosphate metabolic process	15	2	1.31	0.22638
GO:0002213	defense response to insect	11	3	0.96	0.22686
GO:0046274	lignin catabolic process	46	5	4.02	0.22833
GO:0048585	negative regulation of response to stimulus	132	14	11.54	0.22882
GO:0017006	protein-tetrapyrrole linkage	10	0	0.87	0.22969
GO:0048584	positive regulation of response to stimulus	60	4	5.25	0.23049
GO:0002229	defense response to oomycetes	6	1	0.52	0.23066
GO:0006563	L-serine metabolic process	38	2	3.32	0.23099
GO:0016102	diterpenoid biosynthetic process	29	4	2.54	0.23335
GO:0009451	RNA modification	240	7	20.99	0.23351
GO:0006540	glutamate decarboxylation to succinate	8	0	0.7	0.23478
GO:0006538	glutamate catabolic process	8	0	0.7	0.23478
GO:0046653	tetrahydrofolate metabolic process	32	3	2.8	0.23547
GO:0043649	dicarboxylic acid catabolic process	11	1	0.96	0.23554
GO:0060003	copper ion export	11	1	0.96	0.23584
GO:0009073	aromatic amino acid family biosynthetic process	99	8	8.66	0.23612
GO:0006414	translational elongation	111	6	9.71	0.23668
GO:0051707	response to other organism	694	74	60.7	0.237
GO:0043207	response to external biotic stimulus	694	74	60.7	0.237
GO:0005991	trehalose metabolic process	28	6	2.45	0.23778
GO:0005992	trehalose biosynthetic process	28	6	2.45	0.23778
GO:0048580	regulation of post-embryonic development	249	14	21.78	0.23861
GO:0000075	cell cycle checkpoint	13	0	1.14	0.23872
GO:0009612	response to mechanical stimulus	27	6	2.36	0.23991
GO:0009704	de-etiolation	6	1	0.52	0.24004
GO:0006084	acetyl-CoA metabolic process	63	5	5.51	0.24142
GO:0051606	detection of stimulus	75	7	6.56	0.24146
GO:0046246	terpene biosynthetic process	52	5	4.55	0.24169
GO:0006020	inositol metabolic process	18	0	1.57	0.2419
GO:0010115	regulation of abscisic acid biosynthetic process	6	0	0.52	0.24307
GO:0009074	aromatic amino acid family catabolic process	51	7	4.46	0.24351
GO:0045491	xylan metabolic process	130	13	11.37	0.24386
GO:0015858	nucleoside transport	11	0	0.96	0.24405
GO:0009944	polarity specification of adaxial/abaxial axis	40	6	3.5	0.24573
GO:0065001	specification of axis polarity	40	6	3.5	0.24573
GO:0006109	regulation of carbohydrate metabolic process	11	1	0.96	0.24646
GO:0071215	cellular response to abscisic acid stimulus	89	10	7.78	0.24657
GO:0009737	response to abscisic acid	286	30	25.01	0.24736
GO:0006405	RNA export from nucleus	58	3	5.07	0.24861
GO:0043086	negative regulation of catalytic activity	167	18	14.61	0.24949
GO:0019348	dolichol metabolic process	10	3	0.87	0.24994
GO:0019408	dolichol biosynthetic process	10	3	0.87	0.24994
GO:0016093	polyprenol metabolic process	10	3	0.87	0.24994
GO:0016094	polyprenol biosynthetic process	10	3	0.87	0.24994
GO:0070972	protein localization to endoplasmic reticulum	33	2	2.89	0.24994
GO:0032544	plastid translation	7	0	0.61	0.25008
GO:0044839	cell cycle G2/M phase transition	33	3	2.89	0.25115
GO:0000086	G2/M transition of mitotic cell cycle	33	3	2.89	0.25115
GO:0001906	cell killing	16	4	1.4	0.25161
GO:0031640	killing of cells of other organism	16	4	1.4	0.25161
GO:0044364	disruption of cells of other organism	16	4	1.4	0.25161
GO:0044765	single-organism transport	2485	245	217.34	0.25369
GO:0009691	cytokinin biosynthetic process	10	1	0.87	0.25411
GO:0009165	nucleotide biosynthetic process	288	10	25.19	0.25416
GO:0070828	heterochromatin organization	9	0	0.79	0.25508
GO:0031507	heterochromatin assembly	9	0	0.79	0.25508
GO:0006367	transcription initiation from RNA polymerase II promoter	18	0	1.57	0.25539
GO:0070646	protein modification by small protein removal	86	4	7.52	0.25797
GO:0015074	DNA integration	326	1	28.51	0.25876
GO:0010067	procambium histogenesis	7	1	0.61	0.25878
GO:0006105	succinate metabolic process	10	0	0.87	0.25923
GO:0006537	glutamate biosynthetic process	8	2	0.7	0.25937
GO:0042538	hyperosmotic salinity response	72	8	6.3	0.25942
GO:0015802	basic amino acid transport	34	6	2.97	0.26104
GO:0009644	response to high light intensity	107	16	9.36	0.26136
GO:0045492	xylan biosynthetic process	91	11	7.96	0.26264
GO:0009639	response to red or far red light	256	13	22.39	0.26268
GO:0016126	sterol biosynthetic process	86	10	7.52	0.26309
GO:0006829	zinc ion transport	19	4	1.66	0.26462
GO:0090351	seedling development	114	9	9.97	0.26493
GO:0044092	negative regulation of molecular function	174	19	15.22	0.26502
GO:0016556	mRNA modification	73	6	6.38	0.26554
GO:0016103	diterpenoid catabolic process	11	2	0.96	0.26566
GO:0045487	gibberellin catabolic process	11	2	0.96	0.26566
GO:0050896	response to stimulus	4566	484	399.35	0.26573
GO:0051262	protein tetramerization	9	1	0.79	0.26574
GO:0051445	regulation of meiotic cell cycle	13	2	1.14	0.26598
GO:0043289	apocarotenoid biosynthetic process	15	0	1.31	0.26629
GO:0009688	abscisic acid biosynthetic process	15	0	1.31	0.26629
GO:1902645	tertiary alcohol biosynthetic process	15	0	1.31	0.26629
GO:0042886	amide transport	70	12	6.12	0.26663
GO:0043648	dicarboxylic acid metabolic process	114	6	9.97	0.26698
GO:0045216	cell-cell junction organization	6	0	0.52	0.26749
GO:0034330	cell junction organization	6	0	0.52	0.26749
GO:0048589	developmental growth	395	46	34.55	0.26814
GO:0071407	cellular response to organic cyclic compound	209	20	18.28	0.26931
GO:0046394	carboxylic acid biosynthetic process	888	78	77.67	0.26961
GO:0016053	organic acid biosynthetic process	888	78	77.67	0.26961
GO:0048767	root hair elongation	104	16	9.1	0.27026
GO:0006714	sesquiterpenoid metabolic process	19	0	1.66	0.27062
GO:0006418	tRNA aminoacylation for protein translation	103	6	9.01	0.27107
GO:0006595	polyamine metabolic process	38	7	3.32	0.27201
GO:0055114	oxidation-reduction process	2608	267	228.1	0.27205
GO:0000154	rRNA modification	10	0	0.87	0.27233
GO:0006833	water transport	73	9	6.38	0.27246
GO:0042044	fluid transport	73	9	6.38	0.27246
GO:0009755	hormone-mediated signaling pathway	395	42	34.55	0.2728
GO:0032784	regulation of DNA-templated transcription, elongation	10	0	0.87	0.27386
GO:0051783	regulation of nuclear division	20	2	1.75	0.27394
GO:0010082	regulation of root meristem growth	7	0	0.61	0.27399
GO:0006863	purine nucleobase transport	14	2	1.22	0.27591
GO:0048768	root hair cell tip growth	6	0	0.52	0.27616
GO:0031167	rRNA methylation	8	0	0.7	0.2781
GO:0071482	cellular response to light stimulus	41	4	3.59	0.27889
GO:0071478	cellular response to radiation	41	4	3.59	0.27889
GO:0031047	gene silencing by RNA	148	4	12.94	0.27944
GO:0051235	maintenance of location	71	6	6.21	0.28015
GO:0031123	RNA 3'-end processing	22	0	1.92	0.28216
GO:0010225	response to UV-C	9	0	0.79	0.28308
GO:0009943	adaxial/abaxial axis specification	41	6	3.59	0.28393
GO:0010029	regulation of seed germination	22	3	1.92	0.28471
GO:1900140	regulation of seedling development	22	3	1.92	0.28471
GO:1990267	response to transition metal nanoparticle	49	4	4.29	0.28482
GO:0000160	phosphorelay signal transduction system	108	17	9.45	0.28546
GO:0050776	regulation of immune response	160	29	13.99	0.28547
GO:0097306	cellular response to alcohol	124	13	10.85	0.2864
GO:1901990	regulation of mitotic cell cycle phase transition	42	3	3.67	0.28696
GO:1901987	regulation of cell cycle phase transition	42	3	3.67	0.28696
GO:0016116	carotenoid metabolic process	116	3	10.15	0.28909
GO:0016108	tetraterpenoid metabolic process	116	3	10.15	0.28909
GO:0009142	nucleoside triphosphate biosynthetic process	63	4	5.51	0.2902
GO:0007389	pattern specification process	231	25	20.2	0.2906
GO:0046467	membrane lipid biosynthetic process	90	8	7.87	0.29067
GO:0046351	disaccharide biosynthetic process	46	9	4.02	0.29105
GO:0052325	cell wall pectin biosynthetic process	10	1	0.87	0.29191
GO:0044786	cell cycle DNA replication	69	4	6.03	0.29367
GO:0043174	nucleoside salvage	8	0	0.7	0.29439
GO:0006406	mRNA export from nucleus	57	3	4.99	0.29504
GO:0071495	cellular response to endogenous stimulus	399	42	34.9	0.29657
GO:0009756	carbohydrate mediated signaling	65	3	5.68	0.29675
GO:0010182	sugar mediated signaling pathway	65	3	5.68	0.29675
GO:0009723	response to ethylene	137	18	11.98	0.2974
GO:0000302	response to reactive oxygen species	194	22	16.97	0.29903
GO:0006573	valine metabolic process	7	0	0.61	0.29938
GO:0002831	regulation of response to biotic stimulus	17	3	1.49	0.29975
GO:0009926	auxin polar transport	72	10	6.3	0.29977
GO:0006397	mRNA processing	132	6	11.54	0.30057
GO:0002682	regulation of immune system process	164	29	14.34	0.30091
GO:0043200	response to amino acid	6	0	0.52	0.30104
GO:0008643	carbohydrate transport	129	19	11.28	0.30261
GO:0016144	S-glycoside biosynthetic process	86	11	7.52	0.30263
GO:0019761	glucosinolate biosynthetic process	86	11	7.52	0.30263
GO:0019758	glycosinolate biosynthetic process	86	11	7.52	0.30263
GO:0042402	cellular biogenic amine catabolic process	51	9	4.46	0.30267
GO:0009310	amine catabolic process	51	9	4.46	0.30267
GO:0015937	coenzyme A biosynthetic process	6	0	0.52	0.30323
GO:0033866	nucleoside bisphosphate biosynthetic process	6	0	0.52	0.30323
GO:0034030	ribonucleoside bisphosphate biosynthetic process	6	0	0.52	0.30323
GO:0034033	purine nucleoside bisphosphate biosynthetic process	6	0	0.52	0.30323
GO:0036265	RNA (guanine-N7)-methylation	6	0	0.52	0.30491
GO:0097305	response to alcohol	345	38	30.17	0.30547
GO:0042558	pteridine-containing compound metabolic process	58	4	5.07	0.30604
GO:0019953	sexual reproduction	108	5	9.45	0.30642
GO:0006575	cellular modified amino acid metabolic process	105	9	9.18	0.30701
GO:0080147	root hair cell development	107	16	9.36	0.30802
GO:0016119	carotene metabolic process	10	0	0.87	0.30839
GO:0006302	double-strand break repair	67	2	5.86	0.30899
GO:0051501	diterpene phytoalexin metabolic process	11	2	0.96	0.31091
GO:0051502	diterpene phytoalexin biosynthetic process	11	2	0.96	0.31091
GO:0051504	diterpene phytoalexin precursor biosynthetic process pathway	11	2	0.96	0.31091
GO:0001676	long-chain fatty acid metabolic process	17	4	1.49	0.3112
GO:0009856	pollination	181	14	15.83	0.31348
GO:0044706	multi-multicellular organism process	181	14	15.83	0.31348
GO:0051248	negative regulation of protein metabolic process	46	3	4.02	0.31512
GO:0008655	pyrimidine-containing compound salvage	9	0	0.79	0.31582
GO:0009627	systemic acquired resistance	142	13	12.42	0.31731
GO:0051236	establishment of RNA localization	59	3	5.16	0.31887
GO:0050657	nucleic acid transport	59	3	5.16	0.31887
GO:0050658	RNA transport	59	3	5.16	0.31887
GO:0006403	RNA localization	59	3	5.16	0.31887
GO:0051784	negative regulation of nuclear division	9	0	0.79	0.31894
GO:0018131	oxazole or thiazole biosynthetic process	6	0	0.52	0.31909
GO:0052837	thiazole biosynthetic process	6	0	0.52	0.31909
GO:0052838	thiazole metabolic process	6	0	0.52	0.31909
GO:0046484	oxazole or thiazole metabolic process	6	0	0.52	0.31909
GO:0006811	ion transport	1121	121	98.04	0.31911
GO:0035194	posttranscriptional gene silencing by RNA	91	2	7.96	0.31918
GO:0051168	nuclear export	63	3	5.51	0.31987
GO:0042023	DNA endoreduplication	66	4	5.77	0.32007
GO:0032507	maintenance of protein location in cell	22	4	1.92	0.32041
GO:1902580	single-organism cellular localization	269	31	23.53	0.32074
GO:1902578	single-organism localization	269	31	23.53	0.32074
GO:0048588	developmental cell growth	167	22	14.61	0.32087
GO:0060560	developmental growth involved in morphogenesis	273	33	23.88	0.32202
GO:0006997	nucleus organization	44	2	3.85	0.32238
GO:0046112	nucleobase biosynthetic process	19	0	1.66	0.32295
GO:0015748	organophosphate ester transport	89	9	7.78	0.3231
GO:0009741	response to brassinosteroid	68	8	5.95	0.32323
GO:0051604	protein maturation	69	1	6.03	0.32342
GO:0070932	histone H3 deacetylation	10	1	0.87	0.32407
GO:0070933	histone H4 deacetylation	10	1	0.87	0.32407
GO:0003002	regionalization	153	20	13.38	0.32459
GO:1901293	nucleoside phosphate biosynthetic process	291	10	25.45	0.32579
GO:0002252	immune effector process	98	15	8.57	0.3262
GO:0006014	D-ribose metabolic process	12	0	1.05	0.32679
GO:0009145	purine nucleoside triphosphate biosynthetic process	55	4	4.81	0.32702
GO:0009206	purine ribonucleoside triphosphate biosynthetic process	55	4	4.81	0.32702
GO:0010389	regulation of G2/M transition of mitotic cell cycle	31	3	2.71	0.32755
GO:1902749	regulation of cell cycle G2/M phase transition	31	3	2.71	0.32755
GO:0048451	petal formation	22	0	1.92	0.32819
GO:0008612	peptidyl-lysine modification to peptidyl-hypusine	12	1	1.05	0.3294
GO:0009909	regulation of flower development	198	8	17.32	0.33066
GO:0009129	pyrimidine nucleoside monophosphate metabolic process	24	0	2.1	0.33231
GO:0009130	pyrimidine nucleoside monophosphate biosynthetic process	24	0	2.1	0.33231
GO:0032870	cellular response to hormone stimulus	397	42	34.72	0.33254
GO:0009226	nucleotide-sugar biosynthetic process	19	1	1.66	0.33256
GO:0048878	chemical homeostasis	155	14	13.56	0.33298
GO:0072599	establishment of protein localization to endoplasmic reticulum	22	0	1.92	0.33311
GO:0045047	protein targeting to ER	22	0	1.92	0.33311
GO:0010413	glucuronoxylan metabolic process	93	11	8.13	0.33357
GO:0045144	meiotic sister chromatid segregation	6	1	0.52	0.33364
GO:0051177	meiotic sister chromatid cohesion	6	1	0.52	0.33364
GO:0044242	cellular lipid catabolic process	187	11	16.36	0.33445
GO:0071322	cellular response to carbohydrate stimulus	66	3	5.77	0.33463
GO:0006641	triglyceride metabolic process	14	0	1.22	0.33464
GO:0006638	neutral lipid metabolic process	14	0	1.22	0.33464
GO:0006639	acylglycerol metabolic process	14	0	1.22	0.33464
GO:0097354	prenylation	13	0	1.14	0.3347
GO:0018342	protein prenylation	13	0	1.14	0.3347
GO:0051051	negative regulation of transport	11	1	0.96	0.33507
GO:0009260	ribonucleotide biosynthetic process	181	6	15.83	0.33683
GO:0046390	ribose phosphate biosynthetic process	181	6	15.83	0.33683
GO:0016571	histone methylation	153	6	13.38	0.33684
GO:0009624	response to nematode	50	6	4.37	0.33764
GO:0009450	gamma-aminobutyric acid catabolic process	9	0	0.79	0.33829
GO:0009448	gamma-aminobutyric acid metabolic process	9	0	0.79	0.33829
GO:0009867	jasmonic acid mediated signaling pathway	88	12	7.7	0.33875
GO:0071395	cellular response to jasmonic acid stimulus	88	12	7.7	0.33875
GO:0006284	base-excision repair	21	0	1.84	0.33918
GO:0006207	'de novo' pyrimidine nucleobase biosynthetic process	7	0	0.61	0.33975
GO:0042546	cell wall biogenesis	238	20	20.82	0.34078
GO:0006721	terpenoid metabolic process	241	16	21.08	0.34292
GO:0080024	indolebutyric acid metabolic process	6	0	0.52	0.34298
GO:0051273	beta-glucan metabolic process	148	17	12.94	0.34475
GO:0016117	carotenoid biosynthetic process	111	3	9.71	0.34504
GO:0016109	tetraterpenoid biosynthetic process	111	3	9.71	0.34504
GO:0019365	pyridine nucleotide salvage	10	0	0.87	0.34702
GO:0048509	regulation of meristem development	130	12	11.37	0.34964
GO:0003333	amino acid transmembrane transport	49	7	4.29	0.34971
GO:0010310	regulation of hydrogen peroxide metabolic process	49	6	4.29	0.34997
GO:0010074	maintenance of meristem identity	38	3	3.32	0.35
GO:0006164	purine nucleotide biosynthetic process	100	4	8.75	0.35004
GO:0002238	response to molecule of fungal origin	12	2	1.05	0.35103
GO:0009553	embryo sac development	126	3	11.02	0.35172
GO:0051346	negative regulation of hydrolase activity	12	0	1.05	0.35282
GO:0045727	positive regulation of translation	26	2	2.27	0.35332
GO:0006298	mismatch repair	14	1	1.22	0.35348
GO:0009642	response to light intensity	138	17	12.07	0.3547
GO:0072595	maintenance of protein localization in organelle	14	3	1.22	0.35483
GO:0031048	chromatin silencing by small RNA	41	1	3.59	0.35499
GO:0019374	galactolipid metabolic process	49	6	4.29	0.35758
GO:0019375	galactolipid biosynthetic process	49	6	4.29	0.35758
GO:0010043	response to zinc ion	34	2	2.97	0.35882
GO:0006301	postreplication repair	23	1	2.01	0.35885
GO:0032262	pyrimidine nucleotide salvage	8	0	0.7	0.35899
GO:0010138	pyrimidine ribonucleotide salvage	8	0	0.7	0.35899
GO:0044770	cell cycle phase transition	49	3	4.29	0.36057
GO:0044772	mitotic cell cycle phase transition	49	3	4.29	0.36057
GO:0009637	response to blue light	76	1	6.65	0.3608
GO:0016925	protein sumoylation	8	0	0.7	0.36112
GO:0016572	histone phosphorylation	41	2	3.59	0.36157
GO:0030258	lipid modification	206	14	18.02	0.36188
GO:0048609	multicellular organismal reproductive process	167	6	14.61	0.36522
GO:0000002	mitochondrial genome maintenance	7	1	0.61	0.36663
GO:0009628	response to abiotic stimulus	1673	160	146.32	0.36724
GO:0030244	cellulose biosynthetic process	102	10	8.92	0.36821
GO:0080036	regulation of cytokinin-activated signaling pathway	6	1	0.52	0.36836
GO:0046686	response to cadmium ion	358	33	31.31	0.36984
GO:0009645	response to low light intensity stimulus	6	1	0.52	0.37075
GO:0043090	amino acid import	49	7	4.29	0.37086
GO:0051028	mRNA transport	58	3	5.07	0.37248
GO:0010073	meristem maintenance	167	13	14.61	0.37269
GO:0006812	cation transport	767	78	67.08	0.37272
GO:0008356	asymmetric cell division	25	5	2.19	0.37352
GO:0005975	carbohydrate metabolic process	1820	195	159.18	0.37417
GO:0035383	thioester metabolic process	72	5	6.3	0.37639
GO:0006637	acyl-CoA metabolic process	72	5	6.3	0.37639
GO:0042127	regulation of cell proliferation	51	4	4.46	0.37667
GO:0016036	cellular response to phosphate starvation	53	6	4.64	0.37817
GO:0009404	toxin metabolic process	106	13	9.27	0.37836
GO:0019632	shikimate metabolic process	19	0	1.66	0.37892
GO:0042221	response to chemical	2047	239	179.03	0.37918
GO:0019747	regulation of isoprenoid metabolic process	9	0	0.79	0.37923
GO:0001510	RNA methylation	111	0	9.71	0.37934
GO:0006547	histidine metabolic process	16	0	1.4	0.37935
GO:0052803	imidazole-containing compound metabolic process	16	0	1.4	0.37935
GO:0019438	aromatic compound biosynthetic process	2290	170	200.28	0.38103
GO:0006536	glutamate metabolic process	31	2	2.71	0.38126
GO:1901420	negative regulation of response to alcohol	11	0	0.96	0.38131
GO:0009788	negative regulation of abscisic acid-activated signaling pathway	11	0	0.96	0.38131
GO:0009845	seed germination	109	9	9.53	0.3817
GO:0006825	copper ion transport	32	6	2.8	0.38194
GO:0015800	acidic amino acid transport	11	1	0.96	0.38299
GO:0006012	galactose metabolic process	21	3	1.84	0.38308
GO:0035265	organ growth	12	0	1.05	0.38429
GO:0044030	regulation of DNA methylation	6	0	0.52	0.38461
GO:0016106	sesquiterpenoid biosynthetic process	17	0	1.49	0.38801
GO:0043038	amino acid activation	107	6	9.36	0.38907
GO:0043039	tRNA aminoacylation	107	6	9.36	0.38907
GO:0016120	carotene biosynthetic process	8	0	0.7	0.39024
GO:0009435	NAD biosynthetic process	7	0	0.61	0.39211
GO:0048598	embryonic morphogenesis	11	3	0.96	0.39299
GO:0016265	death	220	35	19.24	0.39361
GO:0008219	cell death	220	35	19.24	0.39361
GO:0008216	spermidine metabolic process	17	3	1.49	0.39384
GO:0000079	regulation of cyclin-dependent protein serine/threonine kinase activity	54	2	4.72	0.39401
GO:0071396	cellular response to lipid	156	15	13.64	0.39581
GO:0010948	negative regulation of cell cycle process	12	0	1.05	0.39619
GO:0051241	negative regulation of multicellular organismal process	43	1	3.76	0.39637
GO:0031124	mRNA 3'-end processing	9	0	0.79	0.39652
GO:0006378	mRNA polyadenylation	9	0	0.79	0.39652
GO:0042744	hydrogen peroxide catabolic process	56	6	4.9	0.39733
GO:0009583	detection of light stimulus	15	0	1.31	0.39753
GO:0006783	heme biosynthetic process	36	2	3.15	0.39775
GO:0051053	negative regulation of DNA metabolic process	6	0	0.52	0.39945
GO:0016042	lipid catabolic process	212	12	18.54	0.39967
GO:0044206	UMP salvage	6	0	0.52	0.3997
GO:0043097	pyrimidine nucleoside salvage	6	0	0.52	0.3997
GO:0000917	barrier septum assembly	8	0	0.7	0.40018
GO:0090529	cell septum assembly	8	0	0.7	0.40018
GO:0006879	cellular iron ion homeostasis	12	1	1.05	0.40182
GO:0009201	ribonucleoside triphosphate biosynthetic process	60	4	5.25	0.40189
GO:0051607	defense response to virus	64	3	5.6	0.40238
GO:0044255	cellular lipid metabolic process	1106	81	96.73	0.40345
GO:0035437	maintenance of protein localization in endoplasmic reticulum	11	2	0.96	0.40358
GO:0006621	protein retention in ER lumen	11	2	0.96	0.40358
GO:0090487	secondary metabolite catabolic process	93	10	8.13	0.40397
GO:0009407	toxin catabolic process	93	10	8.13	0.40397
GO:0009266	response to temperature stimulus	518	50	45.3	0.40458
GO:0009814	defense response, incompatible interaction	197	19	17.23	0.40504
GO:0052646	alditol phosphate metabolic process	13	1	1.14	0.40567
GO:0040011	locomotion	11	0	0.96	0.40589
GO:0015931	nucleobase-containing compound transport	132	12	11.54	0.40944
GO:0000077	DNA damage checkpoint	6	0	0.52	0.4096
GO:0031570	DNA integrity checkpoint	6	0	0.52	0.4096
GO:0009850	auxin metabolic process	68	7	5.95	0.4103
GO:0043412	macromolecule modification	2635	219	230.46	0.41084
GO:0071554	cell wall organization or biogenesis	608	67	53.18	0.41317
GO:0044550	secondary metabolite biosynthetic process	185	22	16.18	0.41364
GO:0006629	lipid metabolic process	1425	112	124.63	0.41404
GO:0007205	protein kinase C-activating G-protein coupled receptor signaling pathway	9	2	0.79	0.41482
GO:0072507	divalent inorganic cation homeostasis	25	3	2.19	0.41501
GO:0043900	regulation of multi-organism process	61	6	5.34	0.41589
GO:0009124	nucleoside monophosphate biosynthetic process	107	4	9.36	0.41594
GO:0043605	cellular amide catabolic process	10	0	0.87	0.41619
GO:0019748	secondary metabolic process	379	42	33.15	0.4162
GO:0009743	response to carbohydrate	195	14	17.05	0.41636
GO:0072488	ammonium transmembrane transport	13	2	1.14	0.41672
GO:0016129	phytosteroid biosynthetic process	56	5	4.9	0.4176
GO:0010817	regulation of hormone levels	242	28	21.17	0.41766
GO:0016143	S-glycoside metabolic process	96	12	8.4	0.41853
GO:0019760	glucosinolate metabolic process	96	12	8.4	0.41853
GO:0019757	glycosinolate metabolic process	96	12	8.4	0.41853
GO:0043647	inositol phosphate metabolic process	64	3	5.6	0.41899
GO:0035266	meristem growth	110	11	9.62	0.4195
GO:0010015	root morphogenesis	224	25	19.59	0.4203
GO:0071900	regulation of protein serine/threonine kinase activity	72	3	6.3	0.42057
GO:0010449	root meristem growth	8	0	0.7	0.42059
GO:0009173	pyrimidine ribonucleoside monophosphate metabolic process	22	0	1.92	0.42153
GO:0009174	pyrimidine ribonucleoside monophosphate biosynthetic process	22	0	1.92	0.42153
GO:0046049	UMP metabolic process	22	0	1.92	0.42153
GO:0006222	UMP biosynthetic process	22	0	1.92	0.42153
GO:0006650	glycerophospholipid metabolic process	201	12	17.58	0.42163
GO:0005513	detection of calcium ion	11	2	0.96	0.42423
GO:0006743	ubiquinone metabolic process	19	3	1.66	0.42435
GO:0006744	ubiquinone biosynthetic process	19	3	1.66	0.42435
GO:0010107	potassium ion import	10	2	0.87	0.42443
GO:0035966	response to topologically incorrect protein	183	20	16.01	0.42462
GO:0072528	pyrimidine-containing compound biosynthetic process	140	3	12.24	0.42503
GO:0072329	monocarboxylic acid catabolic process	172	9	15.04	0.42508
GO:0042761	very long-chain fatty acid biosynthetic process	11	2	0.96	0.42561
GO:0046474	glycerophospholipid biosynthetic process	141	9	12.33	0.42589
GO:0010411	xyloglucan metabolic process	9	2	0.79	0.42631
GO:0052546	cell wall pectin metabolic process	26	4	2.27	0.42767
GO:0044282	small molecule catabolic process	328	25	28.69	0.4283
GO:0010106	cellular response to iron ion starvation	18	4	1.57	0.42832
GO:0010193	response to ozone	14	1	1.22	0.42879
GO:0048868	pollen tube development	101	7	8.83	0.42915
GO:0048446	petal morphogenesis	23	0	2.01	0.43027
GO:0008284	positive regulation of cell proliferation	33	4	2.89	0.43059
GO:0050794	regulation of cellular process	3143	268	274.89	0.43081
GO:0042451	purine nucleoside biosynthetic process	80	5	7	0.4311
GO:0046129	purine ribonucleoside biosynthetic process	80	5	7	0.4311
GO:0055072	iron ion homeostasis	20	1	1.75	0.43165
GO:0009615	response to virus	79	4	6.91	0.43361
GO:2000241	regulation of reproductive process	222	8	19.42	0.43445
GO:0015977	carbon fixation	22	0	1.92	0.43452
GO:2000112	regulation of cellular macromolecule biosynthetic process	1398	100	122.27	0.43472
GO:0045596	negative regulation of cell differentiation	53	5	4.64	0.43472
GO:0008380	RNA splicing	196	5	17.14	0.43607
GO:0008361	regulation of cell size	40	5	3.5	0.43684
GO:0033993	response to lipid	391	42	34.2	0.43764
GO:0006767	water-soluble vitamin metabolic process	54	1	4.72	0.43776
GO:0042181	ketone biosynthetic process	32	4	2.8	0.43878
GO:0000105	histidine biosynthetic process	15	0	1.31	0.4388
GO:0009593	detection of chemical stimulus	16	2	1.4	0.43916
GO:0098542	defense response to other organism	496	50	43.38	0.44044
GO:0048564	photosystem I assembly	6	0	0.52	0.44072
GO:0009156	ribonucleoside monophosphate biosynthetic process	103	4	9.01	0.44263
GO:0042732	D-xylose metabolic process	16	3	1.4	0.44272
GO:0048571	long-day photoperiodism	9	1	0.79	0.44469
GO:0048863	stem cell differentiation	48	5	4.2	0.4454
GO:0048864	stem cell development	48	5	4.2	0.4454
GO:0019827	stem cell maintenance	48	5	4.2	0.4454
GO:0098661	inorganic anion transmembrane transport	18	3	1.57	0.4459
GO:0006643	membrane lipid metabolic process	122	8	10.67	0.44607
GO:0006417	regulation of translation	113	7	9.88	0.44637
GO:0006720	isoprenoid metabolic process	438	30	38.31	0.4464
GO:0009877	nodulation	9	1	0.79	0.44668
GO:0006096	glycolytic process	168	8	14.69	0.44713
GO:0034968	histone lysine methylation	121	4	10.58	0.44837
GO:0016132	brassinosteroid biosynthetic process	55	5	4.81	0.44857
GO:0010243	response to organonitrogen compound	127	33	11.11	0.44993
GO:0045017	glycerolipid biosynthetic process	152	9	13.29	0.45149
GO:0042775	mitochondrial ATP synthesis coupled electron transport	18	0	1.57	0.45169
GO:0010556	regulation of macromolecule biosynthetic process	1400	101	122.44	0.4524
GO:0010075	regulation of meristem growth	103	10	9.01	0.45267
GO:0010017	red or far-red light signaling pathway	21	2	1.84	0.45322
GO:0071489	cellular response to red or far red light	21	2	1.84	0.45322
GO:0042430	indole-containing compound metabolic process	73	9	6.38	0.45472
GO:1901606	alpha-amino acid catabolic process	120	12	10.5	0.4549
GO:0006839	mitochondrial transport	122	7	10.67	0.45518
GO:0046373	L-arabinose metabolic process	10	1	0.87	0.45904
GO:0046486	glycerolipid metabolic process	216	12	18.89	0.45984
GO:0008037	cell recognition	44	4	3.85	0.45985
GO:0048544	recognition of pollen	44	4	3.85	0.45985
GO:0012501	programmed cell death	185	32	16.18	0.46051
GO:0010197	polar nucleus fusion	12	1	1.05	0.46081
GO:0034219	carbohydrate transmembrane transport	39	6	3.41	0.46176
GO:0007093	mitotic cell cycle checkpoint	7	0	0.61	0.46252
GO:0007094	mitotic spindle assembly checkpoint	7	0	0.61	0.46252
GO:0071173	spindle assembly checkpoint	7	0	0.61	0.46252
GO:0071174	mitotic spindle checkpoint	7	0	0.61	0.46252
GO:1901991	negative regulation of mitotic cell cycle phase transition	7	0	0.61	0.46252
GO:1901988	negative regulation of cell cycle phase transition	7	0	0.61	0.46252
GO:1902100	negative regulation of metaphase/anaphase transition of cell cycle	7	0	0.61	0.46252
GO:0031577	spindle checkpoint	7	0	0.61	0.46252
GO:0045841	negative regulation of mitotic metaphase/anaphase transition	7	0	0.61	0.46252
GO:0045839	negative regulation of mitosis	7	0	0.61	0.46252
GO:0000394	RNA splicing, via endonucleolytic cleavage and ligation	99	1	8.66	0.46326
GO:0016458	gene silencing	198	6	17.32	0.464
GO:0019856	pyrimidine nucleobase biosynthetic process	11	0	0.96	0.46416
GO:0009630	gravitropism	80	5	7	0.46419
GO:0000819	sister chromatid segregation	14	1	1.22	0.46441
GO:0006457	protein folding	284	27	24.84	0.46517
GO:0006576	cellular biogenic amine metabolic process	118	15	10.32	0.46587
GO:2000377	regulation of reactive oxygen species metabolic process	56	6	4.9	0.46603
GO:0009629	response to gravity	85	6	7.43	0.46643
GO:0010675	regulation of cellular carbohydrate metabolic process	8	1	0.7	0.46685
GO:0055082	cellular chemical homeostasis	99	8	8.66	0.46708
GO:0007154	cell communication	1510	153	132.07	0.46801
GO:0015781	pyrimidine nucleotide-sugar transport	6	0	0.52	0.46917
GO:0019751	polyol metabolic process	95	5	8.31	0.4692
GO:0000398	mRNA splicing, via spliceosome	72	4	6.3	0.46986
GO:0052386	cell wall thickening	28	5	2.45	0.46987
GO:2000026	regulation of multicellular organismal development	396	26	34.63	0.47017
GO:0000959	mitochondrial RNA metabolic process	9	0	0.79	0.47021
GO:1900864	mitochondrial RNA modification	9	0	0.79	0.47021
GO:0009582	detection of abiotic stimulus	24	0	2.1	0.47029
GO:0048364	root development	312	34	27.29	0.47106
GO:0022622	root system development	312	34	27.29	0.47106
GO:0048581	negative regulation of post-embryonic development	38	1	3.32	0.47172
GO:0006357	regulation of transcription from RNA polymerase II promoter	29	0	2.54	0.47227
GO:0006415	translational termination	20	1	1.75	0.47243
GO:0045489	pectin biosynthetic process	13	2	1.14	0.47472
GO:0051302	regulation of cell division	53	4	4.64	0.47489
GO:0035601	protein deacylation	22	3	1.92	0.47561
GO:0006476	protein deacetylation	22	3	1.92	0.47561
GO:0098732	macromolecule deacylation	22	3	1.92	0.47561
GO:0034637	cellular carbohydrate biosynthetic process	437	44	38.22	0.47627
GO:0042364	water-soluble vitamin biosynthetic process	53	1	4.64	0.47666
GO:0072522	purine-containing compound biosynthetic process	117	5	10.23	0.4777
GO:0006349	regulation of gene expression by genetic imprinting	7	0	0.61	0.47836
GO:0071514	genetic imprinting	7	0	0.61	0.47836
GO:0042330	taxis	7	0	0.61	0.47838
GO:0098609	cell-cell adhesion	7	0	0.61	0.47838
GO:0009865	pollen tube adhesion	7	0	0.61	0.47838
GO:0050918	positive chemotaxis	7	0	0.61	0.47838
GO:0010183	pollen tube guidance	7	0	0.61	0.47838
GO:0006935	chemotaxis	7	0	0.61	0.47838
GO:0034645	cellular macromolecule biosynthetic process	3190	221	279	0.47849
GO:0009063	cellular amino acid catabolic process	128	12	11.19	0.47871
GO:0072529	pyrimidine-containing compound catabolic process	9	1	0.79	0.47889
GO:0046174	polyol catabolic process	18	1	1.57	0.4791
GO:0030834	regulation of actin filament depolymerization	6	0	0.52	0.47912
GO:0030835	negative regulation of actin filament depolymerization	6	0	0.52	0.47912
GO:0032269	negative regulation of cellular protein metabolic process	43	2	3.76	0.47945
GO:0009312	oligosaccharide biosynthetic process	56	9	4.9	0.48075
GO:0006066	alcohol metabolic process	270	21	23.61	0.48126
GO:0016125	sterol metabolic process	94	10	8.22	0.48172
GO:0042218	1-aminocyclopropane-1-carboxylate biosynthetic process	13	1	1.14	0.48218
GO:0018871	1-aminocyclopropane-1-carboxylate metabolic process	13	1	1.14	0.48218
GO:0005986	sucrose biosynthetic process	9	0	0.79	0.48234
GO:0046132	pyrimidine ribonucleoside biosynthetic process	28	1	2.45	0.48287
GO:0046134	pyrimidine nucleoside biosynthetic process	28	1	2.45	0.48287
GO:0007602	phototransduction	14	0	1.22	0.48368
GO:0009585	red, far-red light phototransduction	14	0	1.22	0.48368
GO:0006972	hyperosmotic response	120	14	10.5	0.48403
GO:0035999	tetrahydrofolate interconversion	15	1	1.31	0.48503
GO:0006412	translation	833	49	72.85	0.48642
GO:0009932	cell tip growth	105	14	9.18	0.48662
GO:0016114	terpenoid biosynthetic process	216	14	18.89	0.48707
GO:0019395	fatty acid oxidation	145	9	12.68	0.48933
GO:0006635	fatty acid beta-oxidation	145	9	12.68	0.48933
GO:0030154	cell differentiation	555	47	48.54	0.4897
GO:0019742	pentacyclic triterpenoid metabolic process	30	4	2.62	0.49039
GO:0019745	pentacyclic triterpenoid biosynthetic process	30	4	2.62	0.49039
GO:0007091	metaphase/anaphase transition of mitotic cell cycle	11	0	0.96	0.49076
GO:0007088	regulation of mitosis	11	0	0.96	0.49076
GO:0030071	regulation of mitotic metaphase/anaphase transition	11	0	0.96	0.49076
GO:0044784	metaphase/anaphase transition of cell cycle	11	0	0.96	0.49076
GO:1902099	regulation of metaphase/anaphase transition of cell cycle	11	0	0.96	0.49076
GO:0009860	pollen tube growth	66	6	5.77	0.49139
GO:0090332	stomatal closure	10	2	0.87	0.49148
GO:0046168	glycerol-3-phosphate catabolic process	7	1	0.61	0.49211
GO:0009060	aerobic respiration	83	1	7.26	0.49269
GO:0006809	nitric oxide biosynthetic process	6	1	0.52	0.49275
GO:0046209	nitric oxide metabolic process	6	1	0.52	0.49275
GO:0019860	uracil metabolic process	7	0	0.61	0.49366
GO:0051093	negative regulation of developmental process	96	6	8.4	0.49433
GO:0051592	response to calcium ion	17	2	1.49	0.49511
GO:0009052	pentose-phosphate shunt, non-oxidative branch	7	2	0.61	0.49531
GO:0009987	cellular process	12796	997	1119.15	0.49577
GO:0044271	cellular nitrogen compound biosynthetic process	2153	154	188.3	0.49651
GO:0051761	sesquiterpene metabolic process	33	3	2.89	0.49789
GO:0051762	sesquiterpene biosynthetic process	33	3	2.89	0.49789
GO:1903311	regulation of mRNA metabolic process	8	0	0.7	0.4982
GO:0050684	regulation of mRNA processing	8	0	0.7	0.4982
GO:0044700	single organism signaling	1342	136	117.37	0.49825
GO:0006835	dicarboxylic acid transport	32	2	2.8	0.49848
GO:0015718	monocarboxylic acid transport	23	2	2.01	0.4988
GO:0010608	posttranscriptional regulation of gene expression	220	10	19.24	0.49963
GO:0023052	signaling	1343	136	117.46	0.49986
GO:0006520	cellular amino acid metabolic process	846	55	73.99	0.50032
GO:0048468	cell development	322	33	28.16	0.50084
GO:0044703	multi-organism reproductive process	287	19	25.1	0.50123
GO:0009910	negative regulation of flower development	23	1	2.01	0.50392
GO:0034440	lipid oxidation	149	9	13.03	0.50429
GO:0046395	carboxylic acid catabolic process	301	24	26.33	0.50536
GO:0016054	organic acid catabolic process	301	24	26.33	0.50536
GO:0042743	hydrogen peroxide metabolic process	131	16	11.46	0.50604
GO:0016128	phytosteroid metabolic process	58	5	5.07	0.50642
GO:0009559	embryo sac central cell differentiation	14	1	1.22	0.50651
GO:0019344	cysteine biosynthetic process	138	12	12.07	0.50688
GO:0000103	sulfate assimilation	10	1	0.87	0.50707
GO:0010253	UDP-rhamnose biosynthetic process	9	1	0.79	0.50791
GO:0033478	UDP-rhamnose metabolic process	9	1	0.79	0.50791
GO:0045786	negative regulation of cell cycle	28	2	2.45	0.50817
GO:0000271	polysaccharide biosynthetic process	425	43	37.17	0.50983
GO:0080156	mitochondrial mRNA modification	8	0	0.7	0.51135
GO:0046856	phosphatidylinositol dephosphorylation	12	1	1.05	0.51149
GO:0046839	phospholipid dephosphorylation	12	1	1.05	0.51149
GO:0009059	macromolecule biosynthetic process	3237	232	283.11	0.51269
GO:0055081	anion homeostasis	10	2	0.87	0.51419
GO:0009831	plant-type cell wall modification involved in multidimensional cell growth	16	1	1.4	0.5142
GO:0042547	cell wall modification involved in multidimensional cell growth	16	1	1.4	0.5142
GO:0010497	plasmodesmata-mediated intercellular transport	7	0	0.61	0.51422
GO:0009875	pollen-pistil interaction	51	4	4.46	0.5156
GO:0043687	post-translational protein modification	49	2	4.29	0.51628
GO:0007008	outer mitochondrial membrane organization	11	0	0.96	0.51637
GO:0045040	protein import into mitochondrial outer membrane	11	0	0.96	0.51637
GO:0072527	pyrimidine-containing compound metabolic process	150	4	13.12	0.51709
GO:0046939	nucleotide phosphorylation	15	1	1.31	0.51735
GO:0090333	regulation of stomatal closure	7	2	0.61	0.51748
GO:0009891	positive regulation of biosynthetic process	267	15	23.35	0.51908
GO:0048507	meristem development	293	24	25.63	0.51925
GO:0051239	regulation of multicellular organismal process	412	26	36.03	0.52161
GO:0009062	fatty acid catabolic process	162	9	14.17	0.52179
GO:0009955	adaxial/abaxial pattern specification	51	7	4.46	0.52315
GO:0018193	peptidyl-amino acid modification	176	6	15.39	0.52371
GO:0071470	cellular response to osmotic stress	10	1	0.87	0.5238
GO:0009889	regulation of biosynthetic process	1453	106	127.08	0.52471
GO:0007568	aging	77	6	6.73	0.52476
GO:0008295	spermidine biosynthetic process	15	3	1.31	0.52482
GO:0051704	multi-organism process	1009	94	88.25	0.52644
GO:0033530	raffinose metabolic process	6	1	0.52	0.52669
GO:0034484	raffinose catabolic process	6	1	0.52	0.52669
GO:0035670	plant-type ovary development	86	9	7.52	0.52671
GO:0048481	ovule development	86	9	7.52	0.52671
GO:0006970	response to osmotic stress	518	53	45.3	0.52762
GO:0009072	aromatic amino acid family metabolic process	186	16	16.27	0.52776
GO:0006544	glycine metabolic process	52	3	4.55	0.52779
GO:0070301	cellular response to hydrogen peroxide	59	6	5.16	0.52857
GO:0007165	signal transduction	1322	134	115.62	0.52884
GO:0006534	cysteine metabolic process	142	12	12.42	0.53002
GO:0048646	anatomical structure formation involved in morphogenesis	172	15	15.04	0.53135
GO:0043572	plastid fission	17	0	1.49	0.53315
GO:0015985	energy coupled proton transport, down electrochemical gradient	24	2	2.1	0.53387
GO:0015986	ATP synthesis coupled proton transport	24	2	2.1	0.53387
GO:0044106	cellular amine metabolic process	126	15	11.02	0.53414
GO:0046379	extracellular polysaccharide metabolic process	10	1	0.87	0.53532
GO:0045226	extracellular polysaccharide biosynthetic process	10	1	0.87	0.53532
GO:0010114	response to red light	79	4	6.91	0.53549
GO:0009606	tropism	91	6	7.96	0.53598
GO:0051567	histone H3-K9 methylation	79	4	6.91	0.53725
GO:0034284	response to monosaccharide	81	5	7.08	0.53939
GO:0009746	response to hexose	81	5	7.08	0.53939
GO:0016131	brassinosteroid metabolic process	57	5	4.99	0.53969
GO:0042439	ethanolamine-containing compound metabolic process	20	0	1.75	0.54044
GO:0016049	cell growth	367	40	32.1	0.54108
GO:0009225	nucleotide-sugar metabolic process	27	3	2.36	0.54171
GO:0009094	L-phenylalanine biosynthetic process	11	2	0.96	0.54296
GO:1902223	erythrose 4-phosphate/phosphoenolpyruvate family amino acid biosynthetic process	11	2	0.96	0.54296
GO:0010087	phloem or xylem histogenesis	73	3	6.38	0.54353
GO:0046907	intracellular transport	931	63	81.43	0.54356
GO:0044237	cellular metabolic process	10354	779	905.57	0.54424
GO:1901362	organic cyclic compound biosynthetic process	2474	187	216.38	0.54477
GO:0009915	phloem sucrose loading	8	0	0.7	0.54536
GO:0009798	axis specification	47	6	4.11	0.5456
GO:0044766	multi-organism transport	9	0	0.79	0.54722
GO:0034654	nucleobase-containing compound biosynthetic process	1870	134	163.55	0.54727
GO:0046131	pyrimidine ribonucleoside metabolic process	32	2	2.8	0.54884
GO:0006213	pyrimidine nucleoside metabolic process	32	2	2.8	0.54884
GO:0009086	methionine biosynthetic process	82	1	7.17	0.54972
GO:0010099	regulation of photomorphogenesis	25	3	2.19	0.55081
GO:0006106	fumarate metabolic process	6	0	0.52	0.55092
GO:0009855	determination of bilateral symmetry	59	4	5.16	0.55123
GO:0019685	photosynthesis, dark reaction	15	0	1.31	0.55188
GO:0019253	reductive pentose-phosphate cycle	15	0	1.31	0.55188
GO:0032508	DNA duplex unwinding	22	0	1.92	0.55249
GO:0032392	DNA geometric change	22	0	1.92	0.55249
GO:0006082	organic acid metabolic process	1740	121	152.18	0.55274
GO:0048465	corolla development	38	4	3.32	0.55285
GO:0048441	petal development	38	4	3.32	0.55285
GO:0007623	circadian rhythm	62	7	5.42	0.55584
GO:0048511	rhythmic process	62	7	5.42	0.55584
GO:0006909	phagocytosis	6	1	0.52	0.5559
GO:0006739	NADP metabolic process	178	11	15.57	0.55689
GO:1902582	single-organism intracellular transport	742	55	64.9	0.55803
GO:0034755	iron ion transmembrane transport	6	0	0.52	0.56072
GO:0051252	regulation of RNA metabolic process	1284	91	112.3	0.56137
GO:0043436	oxoacid metabolic process	1739	121	152.09	0.56151
GO:0009733	response to auxin	228	26	19.94	0.56242
GO:0036260	RNA capping	8	0	0.7	0.56262
GO:0009452	7-methylguanosine RNA capping	8	0	0.7	0.56262
GO:0090304	nucleic acid metabolic process	3485	185	304.8	0.5627
GO:0044281	small molecule metabolic process	2968	195	259.58	0.56308
GO:0009817	defense response to fungus, incompatible interaction	29	4	2.54	0.56341
GO:0006206	pyrimidine nucleobase metabolic process	16	0	1.4	0.56398
GO:0006419	alanyl-tRNA aminoacylation	31	0	2.71	0.56405
GO:0000413	protein peptidyl-prolyl isomerization	65	2	5.68	0.56442
GO:0015807	L-amino acid transport	11	1	0.96	0.56553
GO:0044260	cellular macromolecule metabolic process	6949	517	607.76	0.56555
GO:0042157	lipoprotein metabolic process	85	3	7.43	0.56577
GO:0071555	cell wall organization	344	39	30.09	0.56592
GO:0015809	arginine transport	9	1	0.79	0.56689
GO:0010375	stomatal complex patterning	6	1	0.52	0.56732
GO:0006555	methionine metabolic process	86	1	7.52	0.56871
GO:0019852	L-ascorbic acid metabolic process	13	0	1.14	0.57068
GO:0019853	L-ascorbic acid biosynthetic process	13	0	1.14	0.57068
GO:0042435	indole-containing compound biosynthetic process	59	8	5.16	0.57073
GO:0010492	maintenance of shoot apical meristem identity	6	0	0.52	0.57182
GO:0055062	phosphate ion homeostasis	6	1	0.52	0.57221
GO:0072506	trivalent inorganic anion homeostasis	6	1	0.52	0.57221
GO:0008299	isoprenoid biosynthetic process	413	28	36.12	0.57248
GO:0032446	protein modification by small protein conjugation	279	23	24.4	0.57321
GO:0042168	heme metabolic process	38	2	3.32	0.57481
GO:0045736	negative regulation of cyclin-dependent protein serine/threonine kinase activity	18	2	1.57	0.57495
GO:0009095	aromatic amino acid family biosynthetic process, prephenate pathway	16	2	1.4	0.57596
GO:0048437	floral organ development	289	26	25.28	0.57715
GO:0010038	response to metal ion	425	40	37.17	0.57847
GO:0042158	lipoprotein biosynthetic process	82	3	7.17	0.57889
GO:0006497	protein lipidation	82	3	7.17	0.57889
GO:0009658	chloroplast organization	175	7	15.31	0.58009
GO:0032259	methylation	583	26	50.99	0.58041
GO:0010468	regulation of gene expression	1477	102	129.18	0.58126
GO:0031326	regulation of cellular biosynthetic process	1423	102	124.46	0.58161
GO:0006400	tRNA modification	36	0	3.15	0.58196
GO:2000034	regulation of seed maturation	6	0	0.52	0.58222
GO:0000162	tryptophan biosynthetic process	21	2	1.84	0.58303
GO:0046219	indolalkylamine biosynthetic process	21	2	1.84	0.58303
GO:0019752	carboxylic acid metabolic process	1733	120	151.57	0.58342
GO:0006564	L-serine biosynthetic process	6	0	0.52	0.5835
GO:0072593	reactive oxygen species metabolic process	159	17	13.91	0.58376
GO:0015936	coenzyme A metabolic process	11	2	0.96	0.58395
GO:0006261	DNA-dependent DNA replication	114	4	9.97	0.58437
GO:0046794	transport of virus	8	0	0.7	0.58515
GO:0009827	plant-type cell wall modification	58	2	5.07	0.58623
GO:0080170	hydrogen peroxide transmembrane transport	7	1	0.61	0.5867
GO:0032940	secretion by cell	86	9	7.52	0.58799
GO:0046903	secretion	86	9	7.52	0.58799
GO:0006355	regulation of transcription, DNA-templated	1267	90	110.81	0.59255
GO:0046165	alcohol biosynthetic process	189	16	16.53	0.59452
GO:0070647	protein modification by small protein conjugation or removal	338	25	29.56	0.59491
GO:0010332	response to gamma radiation	34	0	2.97	0.59529
GO:0048764	trichoblast maturation	152	18	13.29	0.59539
GO:0048765	root hair cell differentiation	152	18	13.29	0.59539
GO:0019566	arabinose metabolic process	11	1	0.96	0.59743
GO:0040007	growth	514	51	44.95	0.59797
GO:0009861	jasmonic acid and ethylene-dependent systemic resistance	10	2	0.87	0.59858
GO:2001141	regulation of RNA biosynthetic process	1269	91	110.99	0.59925
GO:0009699	phenylpropanoid biosynthetic process	84	8	7.35	0.59965
GO:0007164	establishment of tissue polarity	11	2	0.96	0.59988
GO:0044802	single-organism membrane organization	333	31	29.12	0.59999
GO:0010089	xylem development	49	2	4.29	0.60053
GO:0032258	CVT pathway	11	0	0.96	0.6021
GO:0006270	DNA replication initiation	42	2	3.67	0.60249
GO:1901137	carbohydrate derivative biosynthetic process	533	33	46.62	0.6027
GO:0006694	steroid biosynthetic process	115	13	10.06	0.60386
GO:0048569	post-embryonic organ development	327	31	28.6	0.60405
GO:0006402	mRNA catabolic process	60	3	5.25	0.60419
GO:0010053	root epidermal cell differentiation	169	20	14.78	0.60462
GO:0001736	establishment of planar polarity	9	2	0.79	0.60513
GO:0001738	morphogenesis of a polarized epithelium	9	2	0.79	0.60513
GO:0002009	morphogenesis of an epithelium	9	2	0.79	0.60513
GO:0006633	fatty acid biosynthetic process	233	22	20.38	0.6052
GO:0010199	organ boundary specification between lateral organs and the meristem	6	1	0.52	0.6063
GO:0010160	formation of organ boundary	6	1	0.52	0.6063
GO:0048859	formation of anatomical boundary	6	1	0.52	0.6063
GO:0031497	chromatin assembly	74	2	6.47	0.60647
GO:0006071	glycerol metabolic process	13	2	1.14	0.60647
GO:0009826	unidimensional cell growth	211	23	18.45	0.6072
GO:0048469	cell maturation	153	18	13.38	0.60759
GO:0006722	triterpenoid metabolic process	32	4	2.8	0.6083
GO:0016104	triterpenoid biosynthetic process	32	4	2.8	0.6083
GO:0006399	tRNA metabolic process	203	10	17.75	0.6088
GO:0010025	wax biosynthetic process	18	3	1.57	0.61279
GO:0010166	wax metabolic process	18	3	1.57	0.61279
GO:0006446	regulation of translational initiation	32	3	2.8	0.61284
GO:0001731	formation of translation preinitiation complex	32	3	2.8	0.61284
GO:0006351	transcription, DNA-templated	1569	123	137.23	0.61301
GO:0030003	cellular cation homeostasis	91	7	7.96	0.61377
GO:0048508	embryonic meristem development	42	3	3.67	0.61382
GO:0006631	fatty acid metabolic process	422	33	36.91	0.61451
GO:0007140	male meiosis	14	0	1.22	0.61489
GO:0000041	transition metal ion transport	110	14	9.62	0.6159
GO:0006740	NADPH regeneration	170	10	14.87	0.61596
GO:0034613	cellular protein localization	740	45	64.72	0.61706
GO:0032774	RNA biosynthetic process	1573	123	137.58	0.61799
GO:0016070	RNA metabolic process	2437	157	213.14	0.6185
GO:0009220	pyrimidine ribonucleotide biosynthetic process	105	2	9.18	0.61911
GO:0009218	pyrimidine ribonucleotide metabolic process	105	2	9.18	0.61911
GO:0010162	seed dormancy process	68	3	5.95	0.61996
GO:0022611	dormancy process	68	3	5.95	0.61996
GO:0009809	lignin biosynthetic process	24	3	2.1	0.62032
GO:0000038	very long-chain fatty acid metabolic process	40	3	3.5	0.62092
GO:0006260	DNA replication	352	11	30.79	0.62127
GO:0005983	starch catabolic process	18	1	1.57	0.62138
GO:0019058	viral life cycle	14	0	1.22	0.62313
GO:0009851	auxin biosynthetic process	54	5	4.72	0.62317
GO:0048653	anther development	41	6	3.59	0.62432
GO:1901661	quinone metabolic process	30	3	2.62	0.62554
GO:1901663	quinone biosynthetic process	30	3	2.62	0.62554
GO:0043480	pigment accumulation in tissues	46	7	4.02	0.62674
GO:0043481	anthocyanin accumulation in tissues in response to UV light	46	7	4.02	0.62674
GO:0043476	pigment accumulation	46	7	4.02	0.62674
GO:0043478	pigment accumulation in response to UV light	46	7	4.02	0.62674
GO:0043479	pigment accumulation in tissues in response to UV light	46	7	4.02	0.62674
GO:0007067	mitotic nuclear division	61	3	5.34	0.62818
GO:0006569	tryptophan catabolic process	35	5	3.06	0.62818
GO:0046218	indolalkylamine catabolic process	35	5	3.06	0.62818
GO:0009064	glutamine family amino acid metabolic process	71	7	6.21	0.62826
GO:0009113	purine nucleobase biosynthetic process	8	0	0.7	0.6284
GO:0006525	arginine metabolic process	19	3	1.66	0.62961
GO:0043243	positive regulation of protein complex disassembly	13	1	1.14	0.63107
GO:0019684	photosynthesis, light reaction	221	9	19.33	0.63191
GO:0061024	membrane organization	345	31	30.17	0.63204
GO:0042401	cellular biogenic amine biosynthetic process	47	6	4.11	0.63258
GO:0009309	amine biosynthetic process	47	6	4.11	0.63258
GO:0009070	serine family amino acid biosynthetic process	146	12	12.77	0.63495
GO:0006551	leucine metabolic process	17	0	1.49	0.63558
GO:0051223	regulation of protein transport	9	0	0.79	0.63633
GO:0070201	regulation of establishment of protein localization	9	0	0.79	0.63633
GO:0015979	photosynthesis	317	13	27.73	0.63687
GO:0046470	phosphatidylcholine metabolic process	17	0	1.49	0.63687
GO:0010467	gene expression	2971	190	259.85	0.63705
GO:0008152	metabolic process	14005	1193	1224.89	0.63717
GO:0046487	glyoxylate metabolic process	10	0	0.87	0.63729
GO:0032787	monocarboxylic acid metabolic process	977	68	85.45	0.63736
GO:0043161	proteasome-mediated ubiquitin-dependent protein catabolic process	87	5	7.61	0.63766
GO:0016051	carbohydrate biosynthetic process	626	62	54.75	0.6379
GO:0006448	regulation of translational elongation	26	1	2.27	0.6385
GO:0048638	regulation of developmental growth	157	15	13.73	0.6396
GO:0034220	ion transmembrane transport	298	31	26.06	0.63973
GO:0006568	tryptophan metabolic process	56	7	4.9	0.64057
GO:0006586	indolalkylamine metabolic process	56	7	4.9	0.64057
GO:0015740	C4-dicarboxylate transport	18	0	1.57	0.6407
GO:0015743	malate transport	18	0	1.57	0.6407
GO:1901698	response to nitrogen compound	254	47	22.21	0.64139
GO:0048519	negative regulation of biological process	619	47	54.14	0.64152
GO:0010431	seed maturation	77	3	6.73	0.64238
GO:0001708	cell fate specification	40	6	3.5	0.64241
GO:0050793	regulation of developmental process	505	37	44.17	0.64255
GO:0042436	indole-containing compound catabolic process	36	5	3.15	0.64296
GO:0015780	nucleotide-sugar transport	17	0	1.49	0.6432
GO:0043473	pigmentation	47	7	4.11	0.64346
GO:0008283	cell proliferation	129	8	11.28	0.64369
GO:0043170	macromolecule metabolic process	7647	592	668.81	0.64375
GO:0006471	protein ADP-ribosylation	7	1	0.61	0.64543
GO:0071901	negative regulation of protein serine/threonine kinase activity	28	2	2.45	0.6463
GO:0006469	negative regulation of protein kinase activity	28	2	2.45	0.6463
GO:0033673	negative regulation of kinase activity	28	2	2.45	0.6463
GO:0051348	negative regulation of transferase activity	28	2	2.45	0.6463
GO:0006112	energy reserve metabolic process	14	2	1.22	0.64684
GO:0005977	glycogen metabolic process	14	2	1.22	0.64684
GO:0005978	glycogen biosynthetic process	14	2	1.22	0.64684
GO:0006098	pentose-phosphate shunt	169	10	14.78	0.6469
GO:0010030	positive regulation of seed germination	9	1	0.79	0.64779
GO:0009773	photosynthetic electron transport in photosystem I	42	2	3.67	0.64788
GO:0000377	RNA splicing, via transesterification reactions with bulged adenosine as nucleophile	76	4	6.65	0.64843
GO:0010218	response to far red light	76	4	6.65	0.64865
GO:0022904	respiratory electron transport chain	30	1	2.62	0.65012
GO:0033865	nucleoside bisphosphate metabolic process	19	2	1.66	0.65053
GO:0034032	purine nucleoside bisphosphate metabolic process	19	2	1.66	0.65053
GO:0033875	ribonucleoside bisphosphate metabolic process	19	2	1.66	0.65053
GO:0034614	cellular response to reactive oxygen species	69	6	6.03	0.65065
GO:0006813	potassium ion transport	87	8	7.61	0.65338
GO:0051649	establishment of localization in cell	1076	73	94.11	0.65377
GO:0009886	post-embryonic morphogenesis	236	18	20.64	0.65415
GO:0006413	translational initiation	135	14	11.81	0.65416
GO:0071472	cellular response to salt stress	6	0	0.52	0.65481
GO:0016567	protein ubiquitination	269	23	23.53	0.65508
GO:0048440	carpel development	102	10	8.92	0.65514
GO:0006312	mitotic recombination	31	0	2.71	0.65518
GO:0018065	protein-cofactor linkage	6	0	0.52	0.6552
GO:0090066	regulation of anatomical structure size	110	10	9.62	0.65526
GO:0032535	regulation of cellular component size	110	10	9.62	0.65526
GO:0010629	negative regulation of gene expression	255	8	22.3	0.65535
GO:0035195	gene silencing by miRNA	58	2	5.07	0.65584
GO:0015766	disaccharide transport	13	1	1.14	0.65591
GO:0015770	sucrose transport	13	1	1.14	0.65591
GO:0015772	oligosaccharide transport	13	1	1.14	0.65591
GO:0010232	vascular transport	13	0	1.14	0.65591
GO:0010233	phloem transport	13	0	1.14	0.65591
GO:0016559	peroxisome fission	9	1	0.79	0.65673
GO:0048729	tissue morphogenesis	10	2	0.87	0.65737
GO:0018130	heterocycle biosynthetic process	2195	151	191.98	0.65797
GO:0046164	alcohol catabolic process	22	1	1.92	0.65816
GO:1901616	organic hydroxy compound catabolic process	22	1	1.92	0.65816
GO:0019400	alditol metabolic process	14	2	1.22	0.65827
GO:0035384	thioester biosynthetic process	18	1	1.57	0.65927
GO:0071616	acyl-CoA biosynthetic process	18	1	1.57	0.65927
GO:0009749	response to glucose	45	1	3.94	0.66013
GO:0051260	protein homooligomerization	16	2	1.4	0.66021
GO:0009081	branched-chain amino acid metabolic process	37	0	3.24	0.66032
GO:0045597	positive regulation of cell differentiation	8	0	0.7	0.66032
GO:0090329	regulation of DNA-dependent DNA replication	19	0	1.66	0.66211
GO:0016032	viral process	22	0	1.92	0.66227
GO:0043455	regulation of secondary metabolic process	10	1	0.87	0.6632
GO:2000242	negative regulation of reproductive process	25	1	2.19	0.66419
GO:0009308	amine metabolic process	162	19	14.17	0.66475
GO:0015693	magnesium ion transport	21	0	1.84	0.66535
GO:0009785	blue light signaling pathway	13	1	1.14	0.6661
GO:0030522	intracellular receptor signaling pathway	13	1	1.14	0.6661
GO:0071483	cellular response to blue light	13	1	1.14	0.6661
GO:0009416	response to light stimulus	683	55	59.74	0.66613
GO:0006097	glyoxylate cycle	9	0	0.79	0.66668
GO:0016072	rRNA metabolic process	222	10	19.42	0.66747
GO:0006220	pyrimidine nucleotide metabolic process	125	2	10.93	0.66812
GO:0009690	cytokinin metabolic process	21	2	1.84	0.66886
GO:0009799	specification of symmetry	61	5	5.34	0.6689
GO:0031112	positive regulation of microtubule polymerization or depolymerization	6	0	0.52	0.66907
GO:0031113	regulation of microtubule polymerization	6	0	0.52	0.66907
GO:0006188	IMP biosynthetic process	14	0	1.22	0.66916
GO:0046040	IMP metabolic process	14	0	1.22	0.66916
GO:0007031	peroxisome organization	110	6	9.62	0.67131
GO:0006873	cellular ion homeostasis	96	8	8.4	0.67145
GO:0006333	chromatin assembly or disassembly	96	4	8.4	0.67173
GO:0009698	phenylpropanoid metabolic process	150	17	13.12	0.67181
GO:0007017	microtubule-based process	252	15	22.04	0.67196
GO:0051641	cellular localization	1134	78	99.18	0.67358
GO:0060255	regulation of macromolecule metabolic process	1758	123	153.76	0.67448
GO:0000902	cell morphogenesis	330	35	28.86	0.67463
GO:0009913	epidermal cell differentiation	258	28	22.56	0.67468
GO:0030855	epithelial cell differentiation	258	28	22.56	0.67468
GO:0048574	long-day photoperiodism, flowering	8	0	0.7	0.67542
GO:0043484	regulation of RNA splicing	8	0	0.7	0.6758
GO:0000956	nuclear-transcribed mRNA catabolic process	58	3	5.07	0.67793
GO:0021700	developmental maturation	177	20	15.48	0.67966
GO:0042816	vitamin B6 metabolic process	10	0	0.87	0.68026
GO:0042819	vitamin B6 biosynthetic process	10	0	0.87	0.68026
GO:0009071	serine family amino acid catabolic process	41	2	3.59	0.68059
GO:0010119	regulation of stomatal movement	35	5	3.06	0.6809
GO:0005985	sucrose metabolic process	29	1	2.54	0.68092
GO:0009740	gibberellic acid mediated signaling pathway	36	2	3.15	0.68106
GO:0010476	gibberellin mediated signaling pathway	36	2	3.15	0.68106
GO:0071370	cellular response to gibberellin stimulus	36	2	3.15	0.68106
GO:0006364	rRNA processing	218	10	19.07	0.68122
GO:0006848	pyruvate transport	9	0	0.79	0.68144
GO:0009664	plant-type cell wall organization	168	17	14.69	0.68256
GO:2000030	regulation of response to red or far red light	27	3	2.36	0.68307
GO:0045229	external encapsulating structure organization	366	39	32.01	0.68394
GO:0010020	chloroplast fission	15	0	1.31	0.68425
GO:0006826	iron ion transport	36	5	3.15	0.68451
GO:0006323	DNA packaging	89	3	7.78	0.6847
GO:0015713	phosphoglycerate transport	7	0	0.61	0.6851
GO:0042873	aldonate transport	7	0	0.61	0.6851
GO:0009825	multidimensional cell growth	71	8	6.21	0.68562
GO:0019915	lipid storage	43	2	3.76	0.68569
GO:0006221	pyrimidine nucleotide biosynthetic process	124	2	10.85	0.68752
GO:0018208	peptidyl-proline modification	71	2	6.21	0.69015
GO:0032875	regulation of DNA endoreduplication	18	0	1.57	0.69145
GO:0000375	RNA splicing, via transesterification reactions	77	4	6.73	0.69159
GO:0042445	hormone metabolic process	146	14	12.77	0.69166
GO:0006672	ceramide metabolic process	17	0	1.49	0.69211
GO:1901659	glycosyl compound biosynthetic process	192	17	16.79	0.69237
GO:0009148	pyrimidine nucleoside triphosphate biosynthetic process	8	0	0.7	0.69288
GO:0009208	pyrimidine ribonucleoside triphosphate metabolic process	8	0	0.7	0.69288
GO:0009209	pyrimidine ribonucleoside triphosphate biosynthetic process	8	0	0.7	0.69288
GO:0046036	CTP metabolic process	8	0	0.7	0.69288
GO:0006241	CTP biosynthetic process	8	0	0.7	0.69288
GO:0006913	nucleocytoplasmic transport	136	5	11.89	0.69302
GO:0051169	nuclear transport	136	5	11.89	0.69302
GO:0033692	cellular polysaccharide biosynthetic process	391	36	34.2	0.69412
GO:0008610	lipid biosynthetic process	886	74	77.49	0.6943
GO:0006857	oligopeptide transport	61	8	5.34	0.69432
GO:0015833	peptide transport	61	8	5.34	0.69432
GO:0006144	purine nucleobase metabolic process	13	0	1.14	0.69499
GO:0006432	phenylalanyl-tRNA aminoacylation	6	0	0.52	0.69757
GO:0009657	plastid organization	304	14	26.59	0.69768
GO:0009791	post-embryonic development	1202	84	105.13	0.69785
GO:0022900	electron transport chain	185	5	16.18	0.69894
GO:0010044	response to aluminum ion	7	1	0.61	0.69976
GO:0048527	lateral root development	44	5	3.85	0.70031
GO:0048528	post-embryonic root development	44	5	3.85	0.70031
GO:0010054	trichoblast differentiation	161	18	14.08	0.70148
GO:0080090	regulation of primary metabolic process	1787	128	156.29	0.70269
GO:0010267	production of ta-siRNAs involved in RNA interference	47	2	4.11	0.70373
GO:0032880	regulation of protein localization	33	1	2.89	0.70375
GO:0032958	inositol phosphate biosynthetic process	50	0	4.37	0.70396
GO:0009167	purine ribonucleoside monophosphate metabolic process	365	17	31.92	0.70412
GO:0009126	purine nucleoside monophosphate metabolic process	365	17	31.92	0.70412
GO:0002239	response to oomycetes	9	1	0.79	0.70487
GO:0098586	cellular response to virus	34	1	2.97	0.70509
GO:0044273	sulfur compound catabolic process	9	0	0.79	0.70535
GO:0048466	androecium development	83	10	7.26	0.70544
GO:0048443	stamen development	83	10	7.26	0.70544
GO:0006914	autophagy	47	3	4.11	0.70609
GO:0010498	proteasomal protein catabolic process	145	6	12.68	0.70636
GO:0009110	vitamin biosynthetic process	68	1	5.95	0.70675
GO:0010152	pollen maturation	11	1	0.96	0.70754
GO:0070727	cellular macromolecule localization	754	46	65.95	0.70773
GO:0006570	tyrosine metabolic process	10	0	0.87	0.70843
GO:0009683	indoleacetic acid metabolic process	41	5	3.59	0.70894
GO:0009684	indoleacetic acid biosynthetic process	41	5	3.59	0.70894
GO:0030308	negative regulation of cell growth	6	0	0.52	0.70906
GO:0009739	response to gibberellin	62	7	5.42	0.71099
GO:0006850	mitochondrial pyruvate transport	8	0	0.7	0.71112
GO:0042773	ATP synthesis coupled electron transport	22	0	1.92	0.71149
GO:0006119	oxidative phosphorylation	22	0	1.92	0.71149
GO:0009651	response to salt stress	465	45	40.67	0.71175
GO:0006886	intracellular protein transport	715	42	62.53	0.71226
GO:0019674	NAD metabolic process	10	0	0.87	0.71315
GO:0019359	nicotinamide nucleotide biosynthetic process	10	0	0.87	0.71315
GO:0010051	xylem and phloem pattern formation	61	5	5.34	0.71355
GO:0009409	response to cold	299	25	26.15	0.71358
GO:0006596	polyamine biosynthetic process	22	3	1.92	0.71417
GO:0010091	trichome branching	16	1	1.4	0.71459
GO:0046113	nucleobase catabolic process	7	0	0.61	0.71558
GO:0006208	pyrimidine nucleobase catabolic process	7	0	0.61	0.71558
GO:0045003	double-strand break repair via synthesis-dependent strand annealing	7	0	0.61	0.71732
GO:0007062	sister chromatid cohesion	60	5	5.25	0.71851
GO:0071545	inositol phosphate catabolic process	7	1	0.61	0.72167
GO:0046855	inositol phosphate dephosphorylation	7	1	0.61	0.72167
GO:0046838	phosphorylated carbohydrate dephosphorylation	7	1	0.61	0.72167
GO:0008202	steroid metabolic process	127	14	11.11	0.72447
GO:2000280	regulation of root development	16	0	1.4	0.72484
GO:0043405	regulation of MAP kinase activity	18	1	1.57	0.72535
GO:0035196	production of miRNAs involved in gene silencing by miRNA	57	2	4.99	0.72572
GO:0030091	protein repair	7	0	0.61	0.72749
GO:0010206	photosystem II repair	7	0	0.61	0.72749
GO:0010563	negative regulation of phosphorus metabolic process	33	2	2.89	0.72788
GO:0045936	negative regulation of phosphate metabolic process	33	2	2.89	0.72788
GO:0006904	vesicle docking involved in exocytosis	29	1	2.54	0.72825
GO:0034728	nucleosome organization	67	2	5.86	0.72849
GO:0006334	nucleosome assembly	67	2	5.86	0.72849
GO:0016052	carbohydrate catabolic process	510	44	44.6	0.7293
GO:0044419	interspecies interaction between organisms	72	3	6.3	0.7293
GO:0030422	production of siRNA involved in RNA interference	63	2	5.51	0.72938
GO:0046785	microtubule polymerization	51	6	4.46	0.72995
GO:0034599	cellular response to oxidative stress	73	6	6.38	0.73002
GO:0048467	gynoecium development	112	10	9.8	0.73101
GO:0007346	regulation of mitotic cell cycle	64	4	5.6	0.73212
GO:0080050	regulation of seed development	7	0	0.61	0.73256
GO:0010072	primary shoot apical meristem specification	30	2	2.62	0.73271
GO:0010417	glucuronoxylan biosynthetic process	16	2	1.4	0.7328
GO:0046854	phosphatidylinositol phosphorylation	33	3	2.89	0.73342
GO:0046834	lipid phosphorylation	33	3	2.89	0.73342
GO:0006949	syncytium formation	22	3	1.92	0.73669
GO:0006139	nucleobase-containing compound metabolic process	4433	232	387.71	0.73675
GO:0006265	DNA topological change	15	0	1.31	0.73682
GO:0006560	proline metabolic process	16	2	1.4	0.73709
GO:0010214	seed coat development	17	1	1.49	0.73764
GO:0010189	vitamin E biosynthetic process	13	0	1.14	0.73925
GO:0042360	vitamin E metabolic process	13	0	1.14	0.73925
GO:0009813	flavonoid biosynthetic process	101	8	8.83	0.74063
GO:0006401	RNA catabolic process	66	3	5.77	0.74106
GO:0006085	acetyl-CoA biosynthetic process	13	1	1.14	0.74214
GO:0009069	serine family amino acid metabolic process	199	14	17.4	0.74237
GO:0048193	Golgi vesicle transport	235	21	20.55	0.74302
GO:0001522	pseudouridine synthesis	22	0	1.92	0.74502
GO:0009934	regulation of meristem structural organization	12	2	1.05	0.74503
GO:0071826	ribonucleoprotein complex subunit organization	46	4	4.02	0.74518
GO:0022618	ribonucleoprotein complex assembly	46	4	4.02	0.74518
GO:0033036	macromolecule localization	1060	75	92.71	0.74518
GO:0034660	ncRNA metabolic process	421	18	36.82	0.74519
GO:0042991	transcription factor import into nucleus	12	0	1.05	0.74525
GO:0080022	primary root development	11	1	0.96	0.74528
GO:0015672	monovalent inorganic cation transport	322	25	28.16	0.74667
GO:0015969	guanosine tetraphosphate metabolic process	8	0	0.7	0.74709
GO:0034035	purine ribonucleoside bisphosphate metabolic process	8	0	0.7	0.74709
GO:0009112	nucleobase metabolic process	29	0	2.54	0.74774
GO:0009888	tissue development	683	57	59.74	0.74787
GO:0045165	cell fate commitment	43	6	3.76	0.74922
GO:0044275	cellular carbohydrate catabolic process	33	1	2.89	0.75073
GO:0008544	epidermis development	373	38	32.62	0.75137
GO:0060429	epithelium development	373	38	32.62	0.75137
GO:0043588	skin development	373	38	32.62	0.75137
GO:0010496	intercellular transport	11	0	0.96	0.75307
GO:0019321	pentose metabolic process	52	6	4.55	0.75407
GO:0006346	methylation-dependent chromatin silencing	47	1	4.11	0.75432
GO:0046034	ATP metabolic process	341	17	29.82	0.75448
GO:0009100	glycoprotein metabolic process	163	8	14.26	0.75622
GO:0030838	positive regulation of actin filament polymerization	65	6	5.68	0.75692
GO:0045010	actin nucleation	65	6	5.68	0.75692
GO:0006605	protein targeting	541	38	47.32	0.75695
GO:0006887	exocytosis	56	5	4.9	0.75708
GO:0010103	stomatal complex morphogenesis	79	6	6.91	0.7579
GO:0009163	nucleoside biosynthetic process	106	6	9.27	0.75849
GO:0042455	ribonucleoside biosynthetic process	106	6	9.27	0.75849
GO:0006571	tyrosine biosynthetic process	8	0	0.7	0.75901
GO:0051274	beta-glucan biosynthetic process	119	10	10.41	0.75939
GO:0045292	mRNA cis splicing, via spliceosome	7	0	0.61	0.7596
GO:0009937	regulation of gibberellic acid mediated signaling pathway	13	0	1.14	0.76025
GO:0032502	developmental process	2292	176	200.46	0.76026
GO:0040008	regulation of growth	176	15	15.39	0.76102
GO:0035821	modification of morphology or physiology of other organism	54	5	4.72	0.76146
GO:0006546	glycine catabolic process	39	2	3.41	0.76146
GO:0010104	regulation of ethylene-activated signaling pathway	10	1	0.87	0.76147
GO:0070297	regulation of phosphorelay signal transduction system	10	1	0.87	0.76147
GO:0033517	myo-inositol hexakisphosphate metabolic process	49	0	4.29	0.76167
GO:0010264	myo-inositol hexakisphosphate biosynthetic process	49	0	4.29	0.76167
GO:0010048	vernalization response	45	3	3.94	0.76313
GO:0030148	sphingolipid biosynthetic process	21	2	1.84	0.76355
GO:0000070	mitotic sister chromatid segregation	8	0	0.7	0.76385
GO:0006725	cellular aromatic compound metabolic process	4961	279	433.89	0.76399
GO:0048316	seed development	412	27	36.03	0.76417
GO:0009960	endosperm development	7	1	0.61	0.76517
GO:0007020	microtubule nucleation	45	6	3.94	0.7657
GO:0009808	lignin metabolic process	76	8	6.65	0.7661
GO:0052545	callose localization	53	14	4.64	0.76615
GO:0033037	polysaccharide localization	53	14	4.64	0.76615
GO:1901401	regulation of tetrapyrrole metabolic process	12	0	1.05	0.76621
GO:0009892	negative regulation of metabolic process	321	11	28.07	0.76688
GO:0031400	negative regulation of protein modification process	33	2	2.89	0.76709
GO:0031349	positive regulation of defense response	27	1	2.36	0.76731
GO:0010311	lateral root formation	14	2	1.22	0.76731
GO:0051259	protein oligomerization	23	2	2.01	0.76741
GO:0009828	plant-type cell wall loosening	13	1	1.14	0.76754
GO:0016926	protein desumoylation	28	4	2.45	0.76807
GO:1901576	organic substance biosynthetic process	5167	392	451.91	0.76854
GO:0009399	nitrogen fixation	6	1	0.52	0.76946
GO:0034641	cellular nitrogen compound metabolic process	4794	257	419.29	0.77047
GO:0090467	arginine import	7	1	0.61	0.77099
GO:0043091	L-arginine import	7	1	0.61	0.77099
GO:0043092	L-amino acid import	7	1	0.61	0.77099
GO:1902023	L-arginine transport	7	1	0.61	0.77099
GO:1901264	carbohydrate derivative transport	43	0	3.76	0.77212
GO:0043244	regulation of protein complex disassembly	22	1	1.92	0.7734
GO:0018205	peptidyl-lysine modification	69	1	6.03	0.77369
GO:0010260	organ senescence	36	3	3.15	0.77417
GO:0048513	organ development	1040	90	90.96	0.77542
GO:0031328	positive regulation of cellular biosynthetic process	249	14	21.78	0.77591
GO:0010050	vegetative phase change	23	2	2.01	0.77615
GO:0006366	transcription from RNA polymerase II promoter	78	1	6.82	0.77628
GO:0052544	defense response by callose deposition in cell wall	13	2	1.14	0.77636
GO:0052482	defense response by cell wall thickening	13	2	1.14	0.77636
GO:0042180	cellular ketone metabolic process	61	4	5.34	0.77689
GO:0009750	response to fructose	66	4	5.77	0.77733
GO:0001558	regulation of cell growth	64	6	5.6	0.77772
GO:0015031	protein transport	891	58	77.93	0.7778
GO:0042446	hormone biosynthetic process	119	11	10.41	0.77839
GO:0006305	DNA alkylation	88	3	7.7	0.77848
GO:0006306	DNA methylation	88	3	7.7	0.77848
GO:0030865	cortical cytoskeleton organization	20	1	1.75	0.77866
GO:0010605	negative regulation of macromolecule metabolic process	303	11	26.5	0.77918
GO:0072524	pyridine-containing compound metabolic process	205	11	17.93	0.77922
GO:0072525	pyridine-containing compound biosynthetic process	29	0	2.54	0.77922
GO:0009812	flavonoid metabolic process	115	9	10.06	0.77956
GO:0006278	RNA-dependent DNA replication	130	1	11.37	0.7796
GO:0009108	coenzyme biosynthetic process	163	9	14.26	0.78024
GO:0045184	establishment of protein localization	894	58	78.19	0.78024
GO:0006473	protein acetylation	49	0	4.29	0.78114
GO:0006475	internal protein amino acid acetylation	49	0	4.29	0.78114
GO:0016573	histone acetylation	49	0	4.29	0.78114
GO:0018393	internal peptidyl-lysine acetylation	49	0	4.29	0.78114
GO:0018394	peptidyl-lysine acetylation	49	0	4.29	0.78114
GO:0019362	pyridine nucleotide metabolic process	195	11	17.05	0.78119
GO:0051289	protein homotetramerization	7	1	0.61	0.78234
GO:0009147	pyrimidine nucleoside triphosphate metabolic process	9	0	0.79	0.78264
GO:0006352	DNA-templated transcription, initiation	50	1	4.37	0.78267
GO:0050665	hydrogen peroxide biosynthetic process	29	4	2.54	0.78297
GO:1903409	reactive oxygen species biosynthetic process	29	4	2.54	0.78297
GO:0051225	spindle assembly	18	0	1.57	0.78443
GO:0009646	response to absence of light	18	0	1.57	0.78501
GO:0045087	innate immune response	352	46	30.79	0.78547
GO:0051644	plastid localization	80	2	7	0.78707
GO:0044267	cellular protein metabolic process	3692	294	322.9	0.78898
GO:0006108	malate metabolic process	25	2	2.19	0.78899
GO:0030261	chromosome condensation	13	1	1.14	0.78938
GO:0032504	multicellular organism reproduction	183	8	16.01	0.78972
GO:0071669	plant-type cell wall organization or biogenesis	263	19	23	0.78994
GO:0043549	regulation of kinase activity	186	15	16.27	0.78998
GO:0051338	regulation of transferase activity	186	15	16.27	0.78998
GO:0045859	regulation of protein kinase activity	186	15	16.27	0.78998
GO:0052249	modulation of RNA levels in other organism involved in symbiotic interaction	32	1	2.8	0.79029
GO:0052018	modulation by symbiont of RNA levels in host	32	1	2.8	0.79029
GO:0009616	virus induced gene silencing	32	1	2.8	0.79029
GO:0009068	aspartate family amino acid catabolic process	8	0	0.7	0.79037
GO:0046496	nicotinamide nucleotide metabolic process	188	11	16.44	0.79056
GO:1901615	organic hydroxy compound metabolic process	464	35	40.58	0.79135
GO:0046777	protein autophosphorylation	80	8	7	0.7914
GO:0010565	regulation of cellular ketone metabolic process	29	0	2.54	0.79183
GO:0031050	dsRNA fragmentation	71	2	6.21	0.79257
GO:0070918	production of small RNA involved in gene silencing by RNA	71	2	6.21	0.79257
GO:0071359	cellular response to dsRNA	71	2	6.21	0.79257
GO:0043331	response to dsRNA	71	2	6.21	0.79257
GO:0010212	response to ionizing radiation	49	0	4.29	0.7926
GO:0006528	asparagine metabolic process	7	0	0.61	0.7929
GO:0006529	asparagine biosynthetic process	7	0	0.61	0.7929
GO:0006955	immune response	355	46	31.05	0.79329
GO:0019538	protein metabolic process	4253	337	371.97	0.7937
GO:0033554	cellular response to stress	684	64	59.82	0.79372
GO:0006869	lipid transport	82	9	7.17	0.79382
GO:0009765	photosynthesis, light harvesting	33	0	2.89	0.79416
GO:0042545	cell wall modification	173	16	15.13	0.79503
GO:0033385	geranylgeranyl diphosphate metabolic process	6	1	0.52	0.79519
GO:0033386	geranylgeranyl diphosphate biosynthetic process	6	1	0.52	0.79519
GO:0006275	regulation of DNA replication	79	4	6.91	0.79594
GO:0009251	glucan catabolic process	21	1	1.84	0.79597
GO:0044247	cellular polysaccharide catabolic process	21	1	1.84	0.79597
GO:0031334	positive regulation of protein complex assembly	67	6	5.86	0.79632
GO:0032273	positive regulation of protein polymerization	67	6	5.86	0.79632
GO:0009957	epidermal cell fate specification	15	0	1.31	0.79659
GO:0070585	protein localization to mitochondrion	74	0	6.47	0.79699
GO:0006626	protein targeting to mitochondrion	74	0	6.47	0.79699
GO:0072655	establishment of protein localization to mitochondrion	74	0	6.47	0.79699
GO:0060341	regulation of cellular localization	10	0	0.87	0.79734
GO:0009902	chloroplast relocation	78	2	6.82	0.79793
GO:0051667	establishment of plastid localization	78	2	6.82	0.79793
GO:0045682	regulation of epidermis development	13	1	1.14	0.79794
GO:0043043	peptide biosynthetic process	7	0	0.61	0.79821
GO:0009057	macromolecule catabolic process	639	52	55.89	0.80051
GO:0006816	calcium ion transport	105	12	9.18	0.8006
GO:0009084	glutamine family amino acid biosynthetic process	40	4	3.5	0.80249
GO:0000904	cell morphogenesis involved in differentiation	169	15	14.78	0.80359
GO:0009123	nucleoside monophosphate metabolic process	396	17	34.63	0.80361
GO:0009694	jasmonic acid metabolic process	70	6	6.12	0.80449
GO:0006541	glutamine metabolic process	21	2	1.84	0.80585
GO:0030048	actin filament-based movement	22	0	1.92	0.80669
GO:0034470	ncRNA processing	290	12	25.36	0.80679
GO:0070071	proton-transporting two-sector ATPase complex assembly	7	0	0.61	0.80708
GO:0008104	protein localization	930	61	81.34	0.80824
GO:0006888	ER to Golgi vesicle-mediated transport	95	10	8.31	0.80984
GO:0006396	RNA processing	688	28	60.17	0.81002
GO:0032989	cellular component morphogenesis	352	35	30.79	0.81071
GO:0009314	response to radiation	718	55	62.8	0.81153
GO:0002376	immune system process	400	54	34.98	0.81177
GO:0044238	primary metabolic process	10522	817	920.26	0.81191
GO:0009638	phototropism	9	1	0.79	0.81222
GO:0009650	UV protection	6	1	0.52	0.81325
GO:0010154	fruit development	447	29	39.09	0.81367
GO:0048438	floral whorl development	224	22	19.59	0.81405
GO:0046501	protoporphyrinogen IX metabolic process	9	1	0.79	0.8142
GO:0006782	protoporphyrinogen IX biosynthetic process	9	1	0.79	0.8142
GO:0009169	purine ribonucleoside monophosphate catabolic process	286	14	25.01	0.8149
GO:0009158	ribonucleoside monophosphate catabolic process	286	14	25.01	0.8149
GO:0009125	nucleoside monophosphate catabolic process	286	14	25.01	0.8149
GO:0009128	purine nucleoside monophosphate catabolic process	286	14	25.01	0.8149
GO:0006200	ATP catabolic process	286	14	25.01	0.8149
GO:0009767	photosynthetic electron transport chain	57	2	4.99	0.81565
GO:0006732	coenzyme metabolic process	412	26	36.03	0.81706
GO:0010942	positive regulation of cell death	6	0	0.52	0.81751
GO:0071704	organic substance metabolic process	11074	875	968.54	0.81807
GO:0019430	removal of superoxide radicals	9	0	0.79	0.81811
GO:0071450	cellular response to oxygen radical	9	0	0.79	0.81811
GO:0071451	cellular response to superoxide	9	0	0.79	0.81811
GO:0046365	monosaccharide catabolic process	223	11	19.5	0.81874
GO:0006007	glucose catabolic process	223	11	19.5	0.81874
GO:0019320	hexose catabolic process	223	11	19.5	0.81874
GO:0034285	response to disaccharide	93	7	8.13	0.819
GO:0043408	regulation of MAPK cascade	127	13	11.11	0.81919
GO:0009581	detection of external stimulus	28	0	2.45	0.81997
GO:0006771	riboflavin metabolic process	9	1	0.79	0.82026
GO:0009231	riboflavin biosynthetic process	9	1	0.79	0.82026
GO:0042726	flavin-containing compound metabolic process	9	1	0.79	0.82026
GO:0042727	flavin-containing compound biosynthetic process	9	1	0.79	0.82026
GO:0046500	S-adenosylmethionine metabolic process	9	1	0.79	0.82034
GO:0001933	negative regulation of protein phosphorylation	30	2	2.62	0.82112
GO:0042326	negative regulation of phosphorylation	30	2	2.62	0.82112
GO:0042742	defense response to bacterium	246	22	21.52	0.82125
GO:0044728	DNA methylation or demethylation	89	3	7.78	0.82517
GO:0006304	DNA modification	89	3	7.78	0.82517
GO:0006810	transport	3167	289	276.99	0.82683
GO:0010562	positive regulation of phosphorus metabolic process	123	13	10.76	0.8273
GO:0045937	positive regulation of phosphate metabolic process	123	13	10.76	0.8273
GO:0042327	positive regulation of phosphorylation	123	13	10.76	0.8273
GO:0009695	jasmonic acid biosynthetic process	63	6	5.51	0.82817
GO:0007051	spindle organization	19	0	1.66	0.82818
GO:0044265	cellular macromolecule catabolic process	450	18	39.36	0.82867
GO:0009744	response to sucrose	92	7	8.05	0.82883
GO:0052543	callose deposition in cell wall	24	3	2.1	0.82896
GO:0006567	threonine catabolic process	7	0	0.61	0.82901
GO:0031401	positive regulation of protein modification process	122	13	10.67	0.82934
GO:0009161	ribonucleoside monophosphate metabolic process	392	17	34.28	0.82951
GO:0051193	regulation of cofactor metabolic process	13	0	1.14	0.83039
GO:0043413	macromolecule glycosylation	159	7	13.91	0.83063
GO:0009101	glycoprotein biosynthetic process	159	7	13.91	0.83063
GO:0006486	protein glycosylation	159	7	13.91	0.83063
GO:0010639	negative regulation of organelle organization	24	0	2.1	0.83138
GO:0051129	negative regulation of cellular component organization	24	0	2.1	0.83138
GO:0044403	symbiosis, encompassing mutualism through parasitism	71	3	6.21	0.83158
GO:0009631	cold acclimation	8	0	0.7	0.83193
GO:0006289	nucleotide-excision repair	22	0	1.92	0.83268
GO:0001934	positive regulation of protein phosphorylation	120	13	10.5	0.83342
GO:0033674	positive regulation of kinase activity	120	13	10.5	0.83342
GO:0051347	positive regulation of transferase activity	120	13	10.5	0.83342
GO:0045860	positive regulation of protein kinase activity	120	13	10.5	0.83342
GO:0043543	protein acylation	115	2	10.06	0.83454
GO:0006542	glutamine biosynthetic process	8	1	0.7	0.83514
GO:0051094	positive regulation of developmental process	42	1	3.67	0.83621
GO:0006470	protein dephosphorylation	178	15	15.57	0.83681
GO:0022604	regulation of cell morphogenesis	57	5	4.99	0.83682
GO:0010090	trichome morphogenesis	99	9	8.66	0.83776
GO:0042325	regulation of phosphorylation	192	15	16.79	0.83852
GO:0061640	cytoskeleton-dependent cytokinesis	225	10	19.68	0.83852
GO:0009832	plant-type cell wall biogenesis	141	7	12.33	0.83893
GO:0032147	activation of protein kinase activity	117	13	10.23	0.83956
GO:0051247	positive regulation of protein metabolic process	148	15	12.94	0.83979
GO:0065008	regulation of biological quality	775	75	67.78	0.84084
GO:0010374	stomatal complex development	121	10	10.58	0.84117
GO:0090558	plant epidermis development	121	10	10.58	0.84117
GO:0010315	auxin efflux	12	1	1.05	0.84172
GO:0001932	regulation of protein phosphorylation	189	15	16.53	0.84198
GO:0006072	glycerol-3-phosphate metabolic process	11	1	0.96	0.84225
GO:0006818	hydrogen transport	131	7	11.46	0.84245
GO:0015992	proton transport	131	7	11.46	0.84245
GO:0010557	positive regulation of macromolecule biosynthetic process	245	14	21.43	0.84344
GO:0048235	pollen sperm cell differentiation	7	1	0.61	0.8437
GO:0050826	response to freezing	47	2	4.11	0.84408
GO:0019363	pyridine nucleotide biosynthetic process	19	0	1.66	0.84421
GO:0071824	protein-DNA complex subunit organization	76	2	6.65	0.84523
GO:0065004	protein-DNA complex assembly	76	2	6.65	0.84523
GO:0051188	cofactor biosynthetic process	291	15	25.45	0.84623
GO:0019216	regulation of lipid metabolic process	33	2	2.89	0.84812
GO:0006625	protein targeting to peroxisome	84	5	7.35	0.8487
GO:0072662	protein localization to peroxisome	84	5	7.35	0.8487
GO:0072663	establishment of protein localization to peroxisome	84	5	7.35	0.8487
GO:0043574	peroxisomal transport	84	5	7.35	0.8487
GO:0006259	DNA metabolic process	1181	29	103.29	0.85
GO:0010928	regulation of auxin mediated signaling pathway	14	1	1.22	0.85044
GO:0032270	positive regulation of cellular protein metabolic process	145	15	12.68	0.85105
GO:0032268	regulation of cellular protein metabolic process	371	26	32.45	0.85165
GO:0008614	pyridoxine metabolic process	8	0	0.7	0.85205
GO:0008615	pyridoxine biosynthetic process	8	0	0.7	0.85205
GO:0046184	aldehyde biosynthetic process	8	0	0.7	0.85205
GO:0009734	auxin-activated signaling pathway	108	7	9.45	0.85223
GO:0006013	mannose metabolic process	8	0	0.7	0.85282
GO:0019219	regulation of nucleobase-containing compound metabolic process	1402	94	122.62	0.85339
GO:0031323	regulation of cellular metabolic process	1791	126	156.64	0.85429
GO:0044248	cellular catabolic process	1535	96	134.25	0.85537
GO:0009846	pollen germination	46	4	4.02	0.85558
GO:0051234	establishment of localization	3221	290	281.71	0.85599
GO:0000186	activation of MAPKK activity	109	12	9.53	0.85604
GO:0009887	organ morphogenesis	266	17	23.26	0.85625
GO:0031399	regulation of protein modification process	265	19	23.18	0.85714
GO:0006487	protein N-linked glycosylation	53	3	4.64	0.85843
GO:0040034	regulation of development, heterochronic	13	0	1.14	0.85852
GO:0010440	stomatal lineage progression	35	3	3.06	0.85861
GO:0032957	inositol trisphosphate metabolic process	15	2	1.31	0.86046
GO:0043401	steroid hormone mediated signaling pathway	38	3	3.32	0.8605
GO:0009742	brassinosteroid mediated signaling pathway	38	3	3.32	0.8605
GO:0071367	cellular response to brassinosteroid stimulus	38	3	3.32	0.8605
GO:0048545	response to steroid hormone	38	3	3.32	0.8605
GO:0071383	cellular response to steroid hormone stimulus	38	3	3.32	0.8605
GO:0090056	regulation of chlorophyll metabolic process	11	0	0.96	0.86062
GO:0051817	modification of morphology or physiology of other organism involved in symbiotic interaction	41	2	3.59	0.86063
GO:0044003	modification by symbiont of host morphology or physiology	41	2	3.59	0.86063
GO:0010345	suberin biosynthetic process	14	1	1.22	0.86093
GO:0048825	cotyledon development	45	4	3.94	0.86171
GO:0050789	regulation of biological process	3727	312	325.97	0.86234
GO:0009617	response to bacterium	292	26	25.54	0.86256
GO:0022406	membrane docking	34	1	2.97	0.86303
GO:0009835	fruit ripening	13	1	1.14	0.86382
GO:0071695	anatomical structure maturation	13	1	1.14	0.86382
GO:0009793	embryo development ending in seed dormancy	345	23	30.17	0.86494
GO:0051495	positive regulation of cytoskeleton organization	71	6	6.21	0.86496
GO:0031146	SCF-dependent proteasomal ubiquitin-dependent protein catabolic process	10	0	0.87	0.8651
GO:0006022	aminoglycan metabolic process	31	13	2.71	0.86534
GO:0051246	regulation of protein metabolic process	401	27	35.07	0.86541
GO:0009900	dehiscence	10	1	0.87	0.8655
GO:0046890	regulation of lipid biosynthetic process	14	0	1.22	0.86569
GO:0042753	positive regulation of circadian rhythm	6	1	0.52	0.86577
GO:0009834	plant-type secondary cell wall biogenesis	54	0	4.72	0.86589
GO:0048523	negative regulation of cellular process	398	30	34.81	0.86615
GO:0010118	stomatal movement	63	6	5.51	0.8673
GO:0051656	establishment of organelle localization	85	2	7.43	0.86735
GO:1901617	organic hydroxy compound biosynthetic process	317	28	27.73	0.86778
GO:1901605	alpha-amino acid metabolic process	557	35	48.72	0.86794
GO:0016482	cytoplasmic transport	530	26	46.35	0.86845
GO:0006040	amino sugar metabolic process	34	13	2.97	0.86873
GO:0006561	proline biosynthetic process	12	0	1.05	0.86875
GO:0009958	positive gravitropism	17	1	1.49	0.86885
GO:1902600	hydrogen ion transmembrane transport	63	2	5.51	0.86922
GO:0046148	pigment biosynthetic process	266	15	23.26	0.86927
GO:0042822	pyridoxal phosphate metabolic process	7	0	0.61	0.86928
GO:0042823	pyridoxal phosphate biosynthetic process	7	0	0.61	0.86928
GO:0090567	reproductive shoot system development	517	36	45.22	0.87062
GO:1901607	alpha-amino acid biosynthetic process	401	24	35.07	0.87101
GO:0009893	positive regulation of metabolic process	396	28	34.63	0.8715
GO:0034754	cellular hormone metabolic process	62	7	5.42	0.87177
GO:0046173	polyol biosynthetic process	58	0	5.07	0.87178
GO:0022603	regulation of anatomical structure morphogenesis	86	8	7.52	0.87247
GO:0044249	cellular biosynthetic process	4986	367	436.08	0.87391
GO:0072596	establishment of protein localization to chloroplast	53	4	4.64	0.87451
GO:0072598	protein localization to chloroplast	53	4	4.64	0.87451
GO:0045036	protein targeting to chloroplast	53	4	4.64	0.87451
GO:0015914	phospholipid transport	16	1	1.4	0.87464
GO:0044764	multi-organism cellular process	39	1	3.41	0.8747
GO:0051050	positive regulation of transport	8	0	0.7	0.87498
GO:0010959	regulation of metal ion transport	8	0	0.7	0.87498
GO:0009410	response to xenobiotic stimulus	16	0	1.4	0.87566
GO:0051240	positive regulation of multicellular organismal process	33	1	2.89	0.87578
GO:0001666	response to hypoxia	29	2	2.54	0.87622
GO:0036293	response to decreased oxygen levels	29	2	2.54	0.87622
GO:0070482	response to oxygen levels	29	2	2.54	0.87622
GO:0044767	single-organism developmental process	2213	172	193.55	0.87662
GO:0051510	regulation of unidimensional cell growth	55	5	4.81	0.87784
GO:0009107	lipoate biosynthetic process	10	0	0.87	0.87827
GO:0030001	metal ion transport	487	47	42.59	0.87855
GO:0006636	unsaturated fatty acid biosynthetic process	53	3	4.64	0.87984
GO:0033559	unsaturated fatty acid metabolic process	53	3	4.64	0.87984
GO:0000910	cytokinesis	268	12	23.44	0.8802
GO:0007076	mitotic chromosome condensation	7	0	0.61	0.88046
GO:0006766	vitamin metabolic process	88	2	7.7	0.88125
GO:0009790	embryo development	403	26	35.25	0.88188
GO:0007034	vacuolar transport	110	5	9.62	0.88214
GO:0035335	peptidyl-tyrosine dephosphorylation	34	3	2.97	0.88224
GO:0007135	meiosis II	9	1	0.79	0.88233
GO:0007033	vacuole organization	39	3	3.41	0.88234
GO:0010027	thylakoid membrane organization	159	7	13.91	0.88434
GO:0009668	plastid membrane organization	159	7	13.91	0.88434
GO:0006749	glutathione metabolic process	18	1	1.57	0.88469
GO:0015991	ATP hydrolysis coupled proton transport	45	0	3.94	0.88474
GO:0015988	energy coupled proton transmembrane transport, against electrochemical gradient	45	0	3.94	0.88474
GO:0015976	carbon utilization	7	0	0.61	0.88519
GO:0031325	positive regulation of cellular metabolic process	375	27	32.8	0.88777
GO:0051179	localization	3314	300	289.84	0.8878
GO:0010100	negative regulation of photomorphogenesis	8	0	0.7	0.88794
GO:0000278	mitotic cell cycle	251	12	21.95	0.88811
GO:0016558	protein import into peroxisome matrix	78	5	6.82	0.88817
GO:0071365	cellular response to auxin stimulus	109	7	9.53	0.88876
GO:0043242	negative regulation of protein complex disassembly	9	0	0.79	0.88878
GO:1901880	negative regulation of protein depolymerization	9	0	0.79	0.88878
GO:0046483	heterocycle metabolic process	4793	252	419.2	0.89014
GO:0015996	chlorophyll catabolic process	53	2	4.64	0.89047
GO:0046149	pigment catabolic process	53	2	4.64	0.89047
GO:0035303	regulation of dephosphorylation	72	5	6.3	0.8905
GO:0070085	glycosylation	176	9	15.39	0.89176
GO:0006450	regulation of translational fidelity	13	0	1.14	0.89193
GO:0043604	amide biosynthetic process	22	0	1.92	0.89349
GO:1901070	guanosine-containing compound biosynthetic process	7	0	0.61	0.89373
GO:0032501	multicellular organismal process	2176	167	190.31	0.89383
GO:0010604	positive regulation of macromolecule metabolic process	367	27	32.1	0.89392
GO:0046836	glycolipid transport	8	0	0.7	0.89394
GO:0055080	cation homeostasis	120	7	10.5	0.89423
GO:0043414	macromolecule methylation	312	7	27.29	0.89445
GO:0051650	establishment of vesicle localization	6	0	0.52	0.89481
GO:0051648	vesicle localization	6	0	0.52	0.89481
GO:0048658	anther wall tapetum development	6	1	0.52	0.8952
GO:0000919	cell plate assembly	8	0	0.7	0.89542
GO:0009082	branched-chain amino acid biosynthetic process	16	0	1.4	0.89551
GO:0010014	meristem initiation	102	8	8.92	0.89571
GO:0022402	cell cycle process	496	18	43.38	0.89649
GO:0017004	cytochrome complex assembly	12	0	1.05	0.89679
GO:0045333	cellular respiration	114	2	9.97	0.89745
GO:0050801	ion homeostasis	132	9	11.54	0.89839
GO:0033383	geranyl diphosphate metabolic process	11	1	0.96	0.89895
GO:0035304	regulation of protein dephosphorylation	69	5	6.03	0.89903
GO:1901699	cellular response to nitrogen compound	75	2	6.56	0.89929
GO:0032386	regulation of intracellular transport	8	0	0.7	0.89941
GO:0006518	peptide metabolic process	38	2	3.32	0.9002
GO:0006189	'de novo' IMP biosynthetic process	11	0	0.96	0.90027
GO:0010026	trichome differentiation	110	9	9.62	0.90069
GO:0009933	meristem structural organization	156	13	13.64	0.90167
GO:0006508	proteolysis	882	55	77.14	0.90274
GO:0051017	actin filament bundle assembly	10	0	0.87	0.90319
GO:0061572	actin filament bundle organization	10	0	0.87	0.90319
GO:0006733	oxidoreduction coenzyme metabolic process	230	15	20.12	0.90335
GO:0044711	single-organism biosynthetic process	2542	208	222.32	0.90389
GO:0008654	phospholipid biosynthetic process	327	18	28.6	0.90461
GO:0010101	post-embryonic root morphogenesis	20	2	1.75	0.90506
GO:0010102	lateral root morphogenesis	20	2	1.75	0.90506
GO:0055085	transmembrane transport	1089	102	95.24	0.90538
GO:0042176	regulation of protein catabolic process	16	1	1.4	0.90571
GO:1990066	energy quenching	8	0	0.7	0.9063
GO:0010196	nonphotochemical quenching	8	0	0.7	0.9063
GO:0048510	regulation of timing of transition from vegetative to reproductive phase	12	0	1.05	0.90702
GO:0048506	regulation of timing of meristematic phase transition	12	0	1.05	0.90702
GO:0009058	biosynthetic process	5404	403	472.64	0.90724
GO:0006338	chromatin remodeling	25	0	2.19	0.90733
GO:0045338	farnesyl diphosphate metabolic process	10	1	0.87	0.90771
GO:0034655	nucleobase-containing compound catabolic process	587	26	51.34	0.90782
GO:0008652	cellular amino acid biosynthetic process	505	34	44.17	0.90802
GO:0006268	DNA unwinding involved in DNA replication	9	0	0.79	0.90822
GO:0098662	inorganic cation transmembrane transport	210	18	18.37	0.90862
GO:0048582	positive regulation of post-embryonic development	32	1	2.8	0.90866
GO:0015995	chlorophyll biosynthetic process	103	4	9.01	0.90871
GO:0006081	cellular aldehyde metabolic process	258	10	22.56	0.90879
GO:1901566	organonitrogen compound biosynthetic process	976	55	85.36	0.90882
GO:0007005	mitochondrion organization	100	2	8.75	0.91021
GO:0009970	cellular response to sulfate starvation	6	0	0.52	0.9105
GO:0048532	anatomical structure arrangement	161	14	14.08	0.91057
GO:0098655	cation transmembrane transport	212	18	18.54	0.91088
GO:0010150	leaf senescence	25	2	2.19	0.91131
GO:0010207	photosystem II assembly	111	4	9.71	0.91158
GO:0007155	cell adhesion	67	6	5.86	0.91165
GO:0022610	biological adhesion	67	6	5.86	0.91165
GO:0006779	porphyrin-containing compound biosynthetic process	139	6	12.16	0.91245
GO:0051781	positive regulation of cell division	6	0	0.52	0.9128
GO:0009804	coumarin metabolic process	19	0	1.66	0.9132
GO:0009805	coumarin biosynthetic process	19	0	1.66	0.9132
GO:0010453	regulation of cell fate commitment	10	0	0.87	0.91332
GO:0009067	aspartate family amino acid biosynthetic process	117	1	10.23	0.91344
GO:0007267	cell-cell signaling	29	1	2.54	0.91356
GO:0006498	N-terminal protein lipidation	64	2	5.6	0.91412
GO:0006499	N-terminal protein myristoylation	64	2	5.6	0.91412
GO:0018377	protein myristoylation	64	2	5.6	0.91412
GO:0098660	inorganic ion transmembrane transport	215	19	18.8	0.91418
GO:0019222	regulation of metabolic process	2139	152	187.08	0.91433
GO:0009292	genetic transfer	13	0	1.14	0.91546
GO:0009294	DNA mediated transformation	13	0	1.14	0.91546
GO:0006526	arginine biosynthetic process	13	1	1.14	0.91581
GO:1901361	organic cyclic compound catabolic process	753	42	65.86	0.91584
GO:0046466	membrane lipid catabolic process	7	0	0.61	0.91604
GO:0030149	sphingolipid catabolic process	7	0	0.61	0.91604
GO:0033014	tetrapyrrole biosynthetic process	142	6	12.42	0.91628
GO:0090407	organophosphate biosynthetic process	689	27	60.26	0.91643
GO:0031109	microtubule polymerization or depolymerization	54	6	4.72	0.91646
GO:0045337	farnesyl diphosphate biosynthetic process	9	1	0.79	0.91654
GO:0033384	geranyl diphosphate biosynthetic process	9	1	0.79	0.91654
GO:0006000	fructose metabolic process	6	0	0.52	0.91706
GO:0071103	DNA conformation change	124	3	10.85	0.91758
GO:0031324	negative regulation of cellular metabolic process	219	7	19.15	0.91851
GO:1901071	glucosamine-containing compound metabolic process	32	13	2.8	0.91904
GO:0006807	nitrogen compound metabolic process	5329	305	466.08	0.91925
GO:0008064	regulation of actin polymerization or depolymerization	75	6	6.56	0.91929
GO:0032956	regulation of actin cytoskeleton organization	75	6	6.56	0.91929
GO:0032970	regulation of actin filament-based process	75	6	6.56	0.91929
GO:0030832	regulation of actin filament length	75	6	6.56	0.91929
GO:0030833	regulation of actin filament polymerization	75	6	6.56	0.91929
GO:0030041	actin filament polymerization	75	6	6.56	0.91929
GO:0000097	sulfur amino acid biosynthetic process	215	13	18.8	0.91965
GO:0010109	regulation of photosynthesis	14	0	1.22	0.91972
GO:0000469	cleavage involved in rRNA processing	11	0	0.96	0.92011
GO:0000478	endonucleolytic cleavage involved in rRNA processing	11	0	0.96	0.92011
GO:0090501	RNA phosphodiester bond hydrolysis	11	0	0.96	0.92011
GO:0090502	RNA phosphodiester bond hydrolysis, endonucleolytic	11	0	0.96	0.92011
GO:0005984	disaccharide metabolic process	164	14	14.34	0.92024
GO:0009920	cell plate formation involved in plant-type cell wall biogenesis	6	0	0.52	0.9205
GO:2000067	regulation of root morphogenesis	9	0	0.79	0.92122
GO:0019220	regulation of phosphate metabolic process	325	20	28.42	0.92134
GO:0051174	regulation of phosphorus metabolic process	325	20	28.42	0.92134
GO:0044712	single-organism catabolic process	1459	89	127.61	0.92172
GO:0006665	sphingolipid metabolic process	44	2	3.85	0.92213
GO:0090421	embryonic meristem initiation	37	2	3.24	0.92233
GO:0048278	vesicle docking	31	1	2.71	0.92241
GO:0006091	generation of precursor metabolites and energy	581	23	50.81	0.92343
GO:0006778	porphyrin-containing compound metabolic process	204	9	17.84	0.92423
GO:0072348	sulfur compound transport	27	1	2.36	0.9247
GO:0010305	leaf vascular tissue pattern formation	11	1	0.96	0.92513
GO:0006623	protein targeting to vacuole	99	5	8.66	0.9252
GO:0072665	protein localization to vacuole	99	5	8.66	0.9252
GO:0072666	establishment of protein localization to vacuole	99	5	8.66	0.9252
GO:0019439	aromatic compound catabolic process	736	40	64.37	0.92534
GO:0033013	tetrapyrrole metabolic process	206	9	18.02	0.92603
GO:0008272	sulfate transport	26	1	2.27	0.92739
GO:0010628	positive regulation of gene expression	216	12	18.89	0.92824
GO:0045893	positive regulation of transcription, DNA-templated	216	12	18.89	0.92824
GO:0010078	maintenance of root meristem identity	9	0	0.79	0.9283
GO:0044707	single-multicellular organism process	2092	160	182.97	0.92847
GO:0000226	microtubule cytoskeleton organization	145	8	12.68	0.92851
GO:0051171	regulation of nitrogen compound metabolic process	1416	94	123.84	0.92992
GO:0010061	regulation of trichoblast fate specification	8	0	0.7	0.93004
GO:0010057	trichoblast fate specification	8	0	0.7	0.93004
GO:0030856	regulation of epithelial cell differentiation	8	0	0.7	0.93004
GO:0045604	regulation of epidermal cell differentiation	8	0	0.7	0.93004
GO:0042659	regulation of cell fate specification	8	0	0.7	0.93004
GO:0040029	regulation of gene expression, epigenetic	224	6	19.59	0.93019
GO:0046520	sphingoid biosynthetic process	16	1	1.4	0.93068
GO:0051181	cofactor transport	9	0	0.79	0.93097
GO:0009890	negative regulation of biosynthetic process	184	5	16.09	0.9312
GO:0009240	isopentenyl diphosphate biosynthetic process	181	6	15.83	0.9314
GO:0046490	isopentenyl diphosphate metabolic process	181	6	15.83	0.9314
GO:0010876	lipid localization	125	11	10.93	0.9315
GO:0044070	regulation of anion transport	27	2	2.36	0.93184
GO:0051254	positive regulation of RNA metabolic process	219	12	19.15	0.93295
GO:1902680	positive regulation of RNA biosynthetic process	219	12	19.15	0.93295
GO:0031327	negative regulation of cellular biosynthetic process	179	5	15.66	0.93303
GO:0010558	negative regulation of macromolecule biosynthetic process	178	5	15.57	0.93339
GO:2000113	negative regulation of cellular macromolecule biosynthetic process	178	5	15.57	0.93339
GO:0019682	glyceraldehyde-3-phosphate metabolic process	180	6	15.74	0.93408
GO:0042793	transcription from plastid promoter	56	5	4.9	0.93553
GO:0051172	negative regulation of nitrogen compound metabolic process	172	5	15.04	0.93558
GO:0072337	modified amino acid transport	6	0	0.52	0.93586
GO:0045934	negative regulation of nucleobase-containing compound metabolic process	171	5	14.96	0.93595
GO:0044702	single organism reproductive process	963	67	84.22	0.93607
GO:0072594	establishment of protein localization to organelle	409	14	35.77	0.93628
GO:1901136	carbohydrate derivative catabolic process	560	36	48.98	0.93648
GO:0009250	glucan biosynthetic process	279	22	24.4	0.93665
GO:0019288	isopentenyl diphosphate biosynthetic process, methylerythritol 4-phosphate pathway	179	6	15.66	0.93671
GO:0046519	sphingoid metabolic process	17	1	1.49	0.93712
GO:0006775	fat-soluble vitamin metabolic process	15	0	1.31	0.93788
GO:0042362	fat-soluble vitamin biosynthetic process	15	0	1.31	0.93788
GO:0006465	signal peptide processing	17	1	1.49	0.93806
GO:0044272	sulfur compound biosynthetic process	356	25	31.14	0.93821
GO:0051253	negative regulation of RNA metabolic process	164	5	14.34	0.93851
GO:0045892	negative regulation of transcription, DNA-templated	164	5	14.34	0.93851
GO:1902679	negative regulation of RNA biosynthetic process	164	5	14.34	0.93851
GO:0010304	PSII associated light-harvesting complex II catabolic process	15	0	1.31	0.93857
GO:0007129	synapsis	38	2	3.32	0.93894
GO:0042255	ribosome assembly	7	1	0.61	0.93908
GO:0042274	ribosomal small subunit biogenesis	7	1	0.61	0.93908
GO:0009954	proximal/distal pattern formation	15	1	1.31	0.93928
GO:0042440	pigment metabolic process	329	18	28.77	0.93976
GO:0031365	N-terminal protein amino acid modification	65	2	5.68	0.93977
GO:0060284	regulation of cell development	12	0	1.05	0.94058
GO:0044724	single-organism carbohydrate catabolic process	398	20	34.81	0.94132
GO:0019676	ammonia assimilation cycle	6	0	0.52	0.94154
GO:0000096	sulfur amino acid metabolic process	245	14	21.43	0.94286
GO:0051701	interaction with host	46	2	4.02	0.94305
GO:0046434	organophosphate catabolic process	531	22	46.44	0.94321
GO:1901360	organic cyclic compound metabolic process	5134	297	449.02	0.94327
GO:1901565	organonitrogen compound catabolic process	761	52	66.56	0.94378
GO:0009056	catabolic process	2062	150	180.34	0.94396
GO:0070838	divalent metal ion transport	164	14	14.34	0.94403
GO:0065009	regulation of molecular function	507	34	44.34	0.94424
GO:0006793	phosphorus metabolic process	3401	286	297.45	0.94445
GO:0051258	protein polymerization	157	15	13.73	0.94456
GO:0042335	cuticle development	38	2	3.32	0.94461
GO:0071806	protein transmembrane transport	122	6	10.67	0.94524
GO:0065002	intracellular protein transmembrane transport	122	6	10.67	0.94524
GO:0002237	response to molecule of bacterial origin	22	2	1.92	0.94556
GO:1903047	mitotic cell cycle process	159	6	13.91	0.94562
GO:0007275	multicellular organismal development	2012	153	175.97	0.94636
GO:0045037	protein import into chloroplast stroma	13	1	1.14	0.94654
GO:0009164	nucleoside catabolic process	515	21	45.04	0.94685
GO:0042454	ribonucleoside catabolic process	515	21	45.04	0.94685
GO:0072523	purine-containing compound catabolic process	515	20	45.04	0.94685
GO:1901658	glycosyl compound catabolic process	515	21	45.04	0.94685
GO:0044743	intracellular protein transmembrane import	118	6	10.32	0.947
GO:0006591	ornithine metabolic process	8	0	0.7	0.94733
GO:0006152	purine nucleoside catabolic process	514	20	44.95	0.94744
GO:0006821	chloride transport	12	1	1.05	0.94754
GO:0043467	regulation of generation of precursor metabolites and energy	9	0	0.79	0.94764
GO:0042548	regulation of photosynthesis, light reaction	9	0	0.79	0.94764
GO:0009880	embryonic pattern specification	29	2	2.54	0.94768
GO:0005982	starch metabolic process	168	12	14.69	0.94775
GO:0044270	cellular nitrogen compound catabolic process	693	33	60.61	0.9478
GO:0046130	purine ribonucleoside catabolic process	513	20	44.87	0.94803
GO:0046700	heterocycle catabolic process	692	35	60.52	0.94829
GO:0009166	nucleotide catabolic process	512	19	44.78	0.94862
GO:0043407	negative regulation of MAP kinase activity	10	0	0.87	0.94904
GO:0043409	negative regulation of MAPK cascade	10	0	0.87	0.94904
GO:0006790	sulfur compound metabolic process	474	38	41.46	0.94904
GO:0048359	mucilage metabolic process involved in seed coat development	8	0	0.7	0.9491
GO:0070925	organelle assembly	31	1	2.71	0.94916
GO:0009154	purine ribonucleotide catabolic process	511	19	44.69	0.94921
GO:0009146	purine nucleoside triphosphate catabolic process	511	19	44.69	0.94921
GO:0009261	ribonucleotide catabolic process	511	19	44.69	0.94921
GO:0009203	ribonucleoside triphosphate catabolic process	511	19	44.69	0.94921
GO:0009207	purine ribonucleoside triphosphate catabolic process	511	19	44.69	0.94921
GO:0006195	purine nucleotide catabolic process	511	19	44.69	0.94921
GO:0006281	DNA repair	212	6	18.54	0.95013
GO:0046185	aldehyde catabolic process	58	3	5.07	0.95024
GO:0055046	microgametogenesis	13	1	1.14	0.95039
GO:0016311	dephosphorylation	224	18	19.59	0.95056
GO:0051173	positive regulation of nitrogen compound metabolic process	225	12	19.68	0.95139
GO:0009132	nucleoside diphosphate metabolic process	8	1	0.7	0.95285
GO:0044744	protein targeting to nucleus	103	1	9.01	0.95286
GO:0006606	protein import into nucleus	103	1	9.01	0.95286
GO:1902593	single-organism nuclear import	103	1	9.01	0.95286
GO:0051170	nuclear import	103	1	9.01	0.95286
GO:0050790	regulation of catalytic activity	487	34	42.59	0.95307
GO:1901292	nucleoside phosphate catabolic process	513	19	44.87	0.9535
GO:2000243	positive regulation of reproductive process	20	0	1.75	0.95375
GO:0009908	flower development	506	34	44.26	0.9538
GO:0016197	endosomal transport	24	1	2.1	0.95386
GO:0018023	peptidyl-lysine trimethylation	6	0	0.52	0.95388
GO:0009143	nucleoside triphosphate catabolic process	512	19	44.78	0.95405
GO:0006644	phospholipid metabolic process	398	23	34.81	0.95554
GO:0070192	chromosome organization involved in meiosis	39	2	3.41	0.95583
GO:0006814	sodium ion transport	39	0	3.41	0.95586
GO:0009911	positive regulation of flower development	19	0	1.66	0.95601
GO:0009106	lipoate metabolic process	31	1	2.71	0.95658
GO:0007000	nucleolus organization	9	1	0.79	0.95676
GO:0072511	divalent inorganic cation transport	166	14	14.52	0.95741
GO:0015980	energy derivation by oxidation of organic compounds	128	4	11.19	0.95814
GO:0051716	cellular response to stimulus	1905	177	166.61	0.9588
GO:0045814	negative regulation of gene expression, epigenetic	109	3	9.53	0.95883
GO:0006777	Mo-molybdopterin cofactor biosynthetic process	10	0	0.87	0.95917
GO:0043545	molybdopterin cofactor metabolic process	10	0	0.87	0.95917
GO:0019720	Mo-molybdopterin cofactor metabolic process	10	0	0.87	0.95917
GO:0032324	molybdopterin cofactor biosynthetic process	10	0	0.87	0.95917
GO:0051189	prosthetic group metabolic process	10	0	0.87	0.95917
GO:0006342	chromatin silencing	108	3	9.45	0.9592
GO:0045935	positive regulation of nucleobase-containing compound metabolic process	222	12	19.42	0.95926
GO:0033015	tetrapyrrole catabolic process	55	2	4.81	0.95969
GO:0051187	cofactor catabolic process	55	2	4.81	0.95969
GO:0006787	porphyrin-containing compound catabolic process	55	2	4.81	0.95969
GO:0019217	regulation of fatty acid metabolic process	6	0	0.52	0.96024
GO:0006897	endocytosis	41	1	3.59	0.96114
GO:0048354	mucilage biosynthetic process involved in seed coat development	6	0	0.52	0.96158
[truncated: 320 more rows]
