# Supplementary material for: Comparative Transcriptome Analysis of Genes Involved in Anthocyanin Biosynthesis in Red and Green Walnut (Juglans regia L.)
Source: Molecules. 2017 Dec 22;23(1):25. doi: 10.3390/molecules23010025 (PMC5943948; doi:10.3390/molecules23010025)
Supplement: Supplementary file 1 [file molecules-23-00025-s001.zip › S5 Table. KEGG pathways and the corresponding gene numbers and IDs in the transcriptome of red and green walnut..xls]

## Sheet: RYvsNY
KEGG pathways and the corresponding gene numbers and IDs in the transcriptome in the leaf of red and green walnut .
Pathway	ko_ID	DEG	Gene IDs
Arginine and proline metabolism	ko00330	14	gene10523;gene1218;gene15964;gene18397;gene23311;gene28277;gene29846;gene29897;gene31126;gene38522;gene41119;gene41891;gene42928;gene5553
Starch and sucrose metabolism	ko00500	57	Walnut_newGene_4351;Walnut_newGene_4776;Walnut_newGene_6561;gene10264;gene11192;gene11480;gene11706;gene11707;gene1372;gene14457;gene14536;gene15211;gene15662;gene16578;gene1660;gene16643;gene17176;gene1743;gene20592;gene20782;gene21309;gene21380;gene22166;gene22796;gene23341;gene23790;gene24554;gene24739;gene25397;gene26683;gene28924;gene29100;gene30081;gene30240;gene30870;gene31661;gene32276;ge…
Cysteine and methionine metabolism	ko00270	15	gene11035;gene11671;gene14335;gene1507;gene1783;gene21407;gene24504;gene27182;gene32089;gene32288;gene37391;gene38522;gene41960;gene4896;gene5355
Linoleic acid metabolism	ko00591	4	Walnut_newGene_898;gene10659;gene21312;gene23210
Fatty acid degradation	ko00071	21	Walnut_newGene_6669;gene17327;gene17612;gene22919;gene26598;gene27088;gene28277;gene29065;gene29066;gene29846;gene29897;gene31557;gene32597;gene37356;gene37450;gene38350;gene41891;gene42928;gene6860;gene790;gene8742
Biotin metabolism	ko00780	5	Walnut_newGene_4672;gene15687;gene1684;gene29871;gene5377
Propanoate metabolism	ko00640	4	gene12023;gene20278;gene30796;gene4589
Phenylalanine, tyrosine and tryptophan biosynthesis	ko00400	19	Walnut_newGene_1910;gene10136;gene13840;gene13843;gene14359;gene1507;gene20387;gene20755;gene22725;gene27276;gene32288;gene33019;gene39124;gene42683;gene4771;gene540;gene5682;gene7355;gene7399
Valine, leucine and isoleucine biosynthesis	ko00290	3	gene29518;gene4093;gene4136
Flavonoid biosynthesis	ko00941	13	gene10293;gene11289;gene1297;gene15399;gene2551;gene2553;gene35113;gene35863;gene40343;gene43294;gene4387;gene4994;gene6698
RNA degradation	ko03018	11	Walnut_newGene_3969;Walnut_newGene_4273;gene10965;gene18154;gene23120;gene31972;gene35137;gene38061;gene41078;gene5995;gene8375
Fatty acid metabolism	ko01212	26	Walnut_newGene_2069;Walnut_newGene_4672;Walnut_newGene_6669;gene12023;gene14671;gene15687;gene1684;gene20278;gene21395;gene23723;gene243;gene27088;gene29588;gene29871;gene30796;gene31557;gene32597;gene33867;gene33916;gene37356;gene37450;gene38350;gene4589;gene5373;gene5377;gene595
Pyrimidine metabolism	ko00240	17	Walnut_newGene_2076;Walnut_newGene_5055;gene1196;gene12039;gene12063;gene21871;gene22219;gene25292;gene31381;gene31430;gene36953;gene37902;gene39043;gene40864;gene41559;gene42485;gene4390
Ribosome	ko03010	24	Walnut_newGene_2615;Walnut_newGene_2939;Walnut_newGene_5025;Walnut_newGene_5912;Walnut_newGene_942;gene11140;gene14540;gene17363;gene17411;gene20091;gene20553;gene21944;gene22942;gene23574;gene23579;gene24632;gene27324;gene28254;gene37615;gene4394;gene7204;gene8173;gene879;gene8910
Sphingolipid metabolism	ko00600	2	gene25453;gene7642
Sulfur metabolism	ko00920	7	Walnut_newGene_1631;gene11035;gene11671;gene21407;gene22723;gene24504;gene29438
Sulfur relay system	ko04122	1	gene33336
N-Glycan biosynthesis	ko00510	4	gene20631;gene22214;gene23997;gene31817
Endocytosis	ko04144	26	Walnut_newGene_6388;gene10028;gene11529;gene13781;gene14987;gene15092;gene15776;gene17694;gene18451;gene21225;gene22461;gene2550;gene25871;gene25894;gene26246;gene28181;gene30698;gene30944;gene3148;gene34638;gene35988;gene36693;gene42157;gene42685;gene9894;gene9950
Aminoacyl-tRNA biosynthesis	ko00970	2	Walnut_newGene_3344;gene24553
Terpenoid backbone biosynthesis	ko00900	10	Walnut_newGene_6921;gene10821;gene24234;gene32327;gene34643;gene39567;gene40763;gene42017;gene7126;gene9895
Glycerophospholipid metabolism	ko00564	20	Walnut_newGene_1896;Walnut_newGene_5145;Walnut_newGene_7036;gene10659;gene17442;gene22028;gene2363;gene25894;gene26476;gene29844;gene30565;gene34638;gene35988;gene366;gene37924;gene38162;gene38458;gene38622;gene39221;gene41894
Circadian rhythm - plant	ko04712	6	Walnut_newGene_3649;gene10880;gene21203;gene24773;gene35863;gene4994
RNA polymerase	ko03020	4	Walnut_newGene_2076;Walnut_newGene_5055;gene36953;gene40864
Histidine metabolism	ko00340	5	gene28277;gene29846;gene29897;gene41891;gene42928
Oxidative phosphorylation	ko00190	17	Walnut_newGene_1575;Walnut_newGene_1963;Walnut_newGene_2228;Walnut_newGene_346;Walnut_newGene_3873;Walnut_newGene_4810;Walnut_newGene_78;gene1526;gene19831;gene25379;gene2713;gene27792;gene30770;gene3456;gene3711;gene40845;gene8773
Nucleotide excision repair	ko03420	2	Walnut_newGene_7137;gene21230
Steroid biosynthesis	ko00100	8	gene16031;gene1926;gene24076;gene3060;gene32107;gene32397;gene33128;gene9937
Plant-pathogen interaction	ko04626	44	Walnut_newGene_1666;Walnut_newGene_6444;gene10498;gene11380;gene11497;gene11619;gene12888;gene13638;gene14385;gene16065;gene17201;gene17538;gene20559;gene21043;gene21431;gene22109;gene22562;gene22563;gene22567;gene2345;gene23496;gene23562;gene2573;gene25995;gene2606;gene2607;gene2610;gene27703;gene30309;gene31636;gene31726;gene320;gene32437;gene32465;gene34154;gene34234;gene37899;gene38961;gene40…
Fatty acid elongation	ko00062	10	Walnut_newGene_2069;gene13953;gene21395;gene2221;gene243;gene29588;gene33536;gene38100;gene42430;gene8468
Pentose phosphate pathway	ko00030	9	Walnut_newGene_7122;gene10965;gene15187;gene17242;gene28787;gene33434;gene35137;gene38741;gene9938
Alanine, aspartate and glutamate metabolism	ko00250	5	gene14775;gene18397;gene23295;gene23311;gene3850
SNARE interactions in vesicular transport	ko04130	4	Walnut_newGene_271;gene20990;gene27578;gene31539
Synthesis and degradation of ketone bodies	ko00072	1	gene34643
Purine metabolism	ko00230	18	Walnut_newGene_2076;Walnut_newGene_5055;gene1196;gene12063;gene12318;gene13669;gene1379;gene15722;gene15964;gene21871;gene24688;gene25292;gene29438;gene31381;gene31430;gene33533;gene36953;gene40864
Tropane, piperidine and pyridine alkaloid biosynthesis	ko00960	11	gene1507;gene15745;gene1924;gene20387;gene26237;gene26291;gene32288;gene41699;gene7014;gene9130;gene9710
Inositol phosphate metabolism	ko00562	17	gene12084;gene12342;gene1282;gene14987;gene15070;gene15092;gene15847;gene2363;gene23868;gene2550;gene27878;gene3148;gene35489;gene366;gene37924;gene38162;gene589
Phenylalanine metabolism	ko00360	34	gene11371;gene13135;gene14657;gene1507;gene18958;gene20387;gene22607;gene22810;gene24370;gene24792;gene25252;gene2578;gene26237;gene26270;gene26291;gene26878;gene301;gene31413;gene32288;gene32536;gene32684;gene33474;gene34962;gene35745;gene35880;gene36561;gene37179;gene39235;gene40343;gene42912;gene6048;gene6698;gene7203;gene9130
Other types of O-glycan biosynthesis	ko00514	1	gene23261
Glucosinolate biosynthesis	ko00966	2	gene17852;gene43118
Proteasome	ko03050	4	Walnut_newGene_4898;Walnut_newGene_800;gene23600;gene28089
Spliceosome	ko03040	19	Walnut_newGene_5838;Walnut_newGene_6388;Walnut_newGene_7013;gene10028;gene13781;gene15968;gene18451;gene21847;gene22087;gene23251;gene24048;gene26246;gene26823;gene30698;gene31917;gene36693;gene36951;gene38061;gene42157
Folate biosynthesis	ko00790	1	gene33336
Sesquiterpenoid and triterpenoid biosynthesis	ko00909	11	gene16031;gene1639;gene21153;gene24076;gene32107;gene33128;gene33644;gene42519;gene7703;gene7704;gene9677
Photosynthesis	ko00195	8	Walnut_newGene_6911;gene21239;gene23762;gene2713;gene29873;gene3711;gene39645;gene7201
Lysine biosynthesis	ko00300	2	gene25427;gene41960
Photosynthesis - antenna proteins	ko00196	2	Walnut_newGene_806;gene1599
Ubiquinone and other terpenoid-quinone biosynthesis	ko00130	13	gene11371;gene12420;gene1507;gene16004;gene18958;gene26465;gene26666;gene29924;gene301;gene32288;gene40343;gene7462;gene7463
Phosphatidylinositol signaling system	ko04070	14	Walnut_newGene_6444;Walnut_newGene_7036;gene12084;gene14987;gene15070;gene15092;gene23868;gene2550;gene27878;gene3148;gene35489;gene38961;gene589;gene6430
Fructose and mannose metabolism	ko00051	8	Walnut_newGene_2911;gene10965;gene15187;gene21607;gene28787;gene35137;gene3844;gene41001
Amino sugar and nucleotide sugar metabolism	ko00520	30	gene10264;gene11480;gene14536;gene15580;gene15583;gene15585;gene15590;gene1660;gene17176;gene19363;gene21380;gene21607;gene22166;gene22388;gene22425;gene22773;gene24739;gene25397;gene26478;gene33422;gene3534;gene39363;gene39933;gene42460;gene456;gene5913;gene6283;gene687;gene7535;gene7612
Biosynthesis of unsaturated fatty acids	ko01040	11	Walnut_newGene_6669;gene14671;gene1684;gene21395;gene23723;gene243;gene29588;gene32597;gene33916;gene5373;gene595
Phenylpropanoid biosynthesis	ko00940	56	Walnut_newGene_6654;Walnut_newGene_682;gene11192;gene11289;gene11371;gene13135;gene14657;gene16465;gene16643;gene16704;gene17190;gene18958;gene20944;gene22607;gene22796;gene22810;gene24370;gene24554;gene24792;gene25252;gene2578;gene26270;gene26278;gene26374;gene26730;gene26878;gene301;gene30240;gene30870;gene31413;gene32536;gene32684;gene33474;gene34027;gene34962;gene35144;gene3523;gene35745;gene…
Glycerolipid metabolism	ko00561	14	Walnut_newGene_5145;gene25453;gene26476;gene28277;gene29844;gene29846;gene29897;gene3844;gene38458;gene38622;gene39221;gene41891;gene41894;gene42928
Nicotinate and nicotinamide metabolism	ko00760	3	Walnut_newGene_121;gene1196;gene21871
Mismatch repair	ko03430	1	gene21230
Stilbenoid, diarylheptanoid and gingerol biosynthesis	ko00945	3	gene11289;gene40343;gene6698
Arachidonic acid metabolism	ko00590	5	gene10659;gene12989;gene12992;gene28949;gene7585
Protein processing in endoplasmic reticulum	ko04141	54	Walnut_newGene_1698;Walnut_newGene_5148;Walnut_newGene_568;Walnut_newGene_6388;Walnut_newGene_6769;Walnut_newGene_7137;gene10028;gene12657;gene12931;gene13638;gene13781;gene13943;gene14031;gene1516;gene15725;gene17136;gene17137;gene18032;gene18451;gene20631;gene21126;gene21556;gene22834;gene22915;gene22925;gene23997;gene24281;gene24391;gene24525;gene26246;gene26309;gene26371;gene28347;gene29255;g…
Pentose and glucuronate interconversions	ko00040	27	gene15089;gene15662;gene16578;gene1743;gene19363;gene20592;gene20782;gene21357;gene23341;gene23790;gene26627;gene28277;gene28622;gene28924;gene29846;gene29897;gene30081;gene31030;gene33110;gene33422;gene37242;gene3844;gene38986;gene39344;gene41891;gene42928;gene8349
Pantothenate and CoA biosynthesis	ko00770	3	gene4093;gene4136;gene4390
Lysine degradation	ko00310	6	gene2737;gene28277;gene29846;gene29897;gene41891;gene42928
Regulation of autophagy	ko04140	1	gene10426
Tyrosine metabolism	ko00350	19	gene1507;gene17327;gene17612;gene20387;gene22919;gene26237;gene26291;gene26598;gene26883;gene29065;gene29066;gene31208;gene32288;gene34163;gene42715;gene6860;gene790;gene8742;gene9130
Glycosphingolipid biosynthesis - globo series	ko00603	2	gene25453;gene7535
Flavone and flavonol biosynthesis	ko00944	1	gene4387
Cutin, suberine and wax biosynthesis	ko00073	10	gene14511;gene16946;gene29091;gene3210;gene35573;gene386;gene39381;gene39382;gene40677;gene41363
Other glycan degradation	ko00511	5	gene20233;gene22406;gene32965;gene39792;gene7535
Citrate cycle (TCA cycle)	ko00020	8	Walnut_newGene_1106;gene13474;gene1783;gene27182;gene2737;gene27394;gene30210;gene40845
Pyruvate metabolism	ko00620	22	Walnut_newGene_1106;gene10526;gene12023;gene12318;gene13669;gene1783;gene20278;gene21166;gene24688;gene27182;gene27766;gene28277;gene29846;gene29897;gene30210;gene30219;gene30796;gene33533;gene41891;gene42928;gene4589;gene8268
Isoquinoline alkaloid biosynthesis	ko00950	8	gene1507;gene20387;gene26237;gene26291;gene31208;gene32288;gene34163;gene9130
Limonene and pinene degradation	ko00903	4	gene29846;gene29897;gene41891;gene42928
Brassinosteroid biosynthesis	ko00905	5	gene11012;gene32202;gene33552;gene35675;gene38856
DNA replication	ko03030	7	gene12063;gene21230;gene31430;gene3193;gene37518;gene5794;gene9921
Glycine, serine and threonine metabolism	ko00260	10	gene20485;gene23295;gene26237;gene26291;gene28493;gene29518;gene41960;gene5384;gene7399;gene9130
Carbon fixation in photosynthetic organisms	ko00710	12	gene15187;gene17242;gene1783;gene19241;gene21166;gene27182;gene27766;gene28787;gene30210;gene38741;gene8013;gene8268
Zeatin biosynthesis	ko00908	6	gene1204;gene24518;gene35249;gene38492;gene8599;gene9174
Carbon metabolism	ko01200	47	Walnut_newGene_1106;Walnut_newGene_7122;gene10965;gene11035;gene11671;gene12023;gene12318;gene13474;gene13669;gene15187;gene17242;gene17327;gene17612;gene1783;gene19241;gene20278;gene21166;gene21407;gene22204;gene24504;gene24688;gene26598;gene27182;gene2737;gene27394;gene27766;gene28493;gene28787;gene29065;gene29066;gene29518;gene30210;gene30796;gene32687;gene33434;gene33533;gene35137;gene38741;g…
Ascorbate and aldarate metabolism	ko00053	13	gene1282;gene19363;gene26051;gene26955;gene28277;gene29846;gene29897;gene31196;gene31197;gene33422;gene37065;gene41891;gene42928
Homologous recombination	ko03440	2	gene21230;gene24468
Glyoxylate and dicarboxylate metabolism	ko00630	8	gene1783;gene23311;gene26968;gene27182;gene28493;gene32687;gene40421;gene6493
Diterpenoid biosynthesis	ko00904	4	gene15437;gene36153;gene37936;gene42132
Cyanoamino acid metabolism	ko00460	20	gene11192;gene12989;gene12992;gene16643;gene22796;gene24554;gene28493;gene30240;gene30870;gene32687;gene34027;gene3523;gene41153;gene41171;gene43301;gene6347;gene7585;gene7793;gene8358;gene9410
Ubiquitin mediated proteolysis	ko04120	11	gene12534;gene12657;gene14031;gene14255;gene23034;gene23065;gene3131;gene38193;gene40535;gene40644;gene6834
Biosynthesis of amino acids	ko01230	49	Walnut_newGene_1910;gene10136;gene10523;gene10965;gene11035;gene11671;gene12318;gene13474;gene13669;gene13840;gene13843;gene14335;gene14359;gene1507;gene15187;gene17242;gene19241;gene20387;gene20485;gene20755;gene21407;gene22725;gene23311;gene24504;gene24688;gene25427;gene27276;gene27394;gene28493;gene29518;gene32089;gene32288;gene33019;gene33533;gene35137;gene38741;gene39124;gene4093;gene4136;ge…
Phagosome	ko04145	20	Walnut_newGene_78;gene12931;gene16924;gene18318;gene21126;gene21225;gene22461;gene27803;gene28061;gene28181;gene28404;gene30228;gene31941;gene37060;gene40933;gene41758;gene4695;gene6521;gene7818;gene9808
Taurine and hypotaurine metabolism	ko00430	6	gene12989;gene12992;gene14775;gene22036;gene3850;gene7585
Glycosaminoglycan degradation	ko00531	7	Walnut_newGene_3456;gene11581;gene26537;gene37050;gene6372;gene7535;gene865
Degradation of aromatic compounds	ko01220	9	gene17327;gene17612;gene22919;gene26598;gene29065;gene29066;gene40343;gene6860;gene790
Monoterpenoid biosynthesis	ko00902	7	Walnut_newGene_3647;gene14790;gene14791;gene22402;gene26341;gene40518;gene40524
alpha-Linolenic acid metabolism	ko00592	15	Walnut_newGene_6669;Walnut_newGene_7279;Walnut_newGene_898;gene10659;gene113;gene21312;gene23210;gene24794;gene28251;gene30329;gene31557;gene32597;gene38350;gene6316;gene8742
Basal transcription factors	ko03022	1	Walnut_newGene_4006
mRNA surveillance pathway	ko03015	6	Walnut_newGene_1806;gene13597;gene27168;gene36951;gene3922;gene40124
Glutathione metabolism	ko00480	31	Walnut_newGene_3874;gene10358;gene12982;gene12989;gene12992;gene13474;gene14542;gene15482;gene15483;gene15484;gene15677;gene20365;gene21531;gene22937;gene25292;gene25440;gene26072;gene26955;gene27394;gene27674;gene27777;gene28949;gene29357;gene31381;gene33836;gene33837;gene37065;gene38941;gene5888;gene7105;gene7585
Plant hormone signal transduction	ko04075	72	Walnut_newGene_167;Walnut_newGene_186;Walnut_newGene_188;Walnut_newGene_6739;gene10880;gene11662;gene11860;gene12381;gene13120;gene13747;gene13801;gene14333;gene15875;gene15935;gene16201;gene17201;gene1745;gene17807;gene20032;gene20559;gene22246;gene22562;gene22563;gene22567;gene24188;gene24300;gene24309;gene2544;gene25889;gene27065;gene28171;gene28191;gene28422;gene28702;gene29361;gene29921;gene…
Tryptophan metabolism	ko00380	10	gene17852;gene26968;gene28277;gene29846;gene29897;gene35956;gene41891;gene42928;gene43118;gene6493
Valine, leucine and isoleucine degradation	ko00280	10	gene10929;gene28277;gene29846;gene29897;gene32597;gene34643;gene4093;gene4136;gene41891;gene42928
Glycosphingolipid biosynthesis - ganglio series	ko00604	1	gene7535
Peroxisome	ko04146	17	Walnut_newGene_6160;Walnut_newGene_6669;gene13474;gene14511;gene16482;gene20068;gene21842;gene23080;gene26968;gene27088;gene27394;gene32597;gene37356;gene37450;gene38400;gene39817;gene6493
Selenocompound metabolism	ko00450	3	gene14335;gene29438;gene37391
Protein export	ko03060	7	gene12931;gene17350;gene19064;gene22037;gene25203;gene36949;gene6692
Nitrogen metabolism	ko00910	6	gene18397;gene23311;gene31029;gene32687;gene35324;gene9665
Fatty acid biosynthesis	ko00061	14	Walnut_newGene_4672;gene12023;gene15687;gene1684;gene20278;gene27088;gene29871;gene30796;gene33867;gene37356;gene37450;gene41480;gene4589;gene5377
Galactose metabolism	ko00052	14	gene10414;gene10965;gene11707;gene14457;gene18052;gene25453;gene2892;gene30557;gene31661;gene31964;gene31973;gene35137;gene3844;gene38912
Base excision repair	ko03410	5	gene21411;gene2212;gene22797;gene37524;gene39005
One carbon pool by folate	ko00670	3	gene22204;gene28493;gene5384
2-Oxocarboxylic acid metabolism	ko01210	6	gene13474;gene17852;gene27394;gene4093;gene4136;gene43118
Glycolysis / Gluconeogenesis	ko00010	29	Walnut_newGene_762;gene10965;gene12318;gene13669;gene15187;gene17327;gene17612;gene19241;gene22919;gene24688;gene26598;gene28277;gene28787;gene29065;gene29066;gene29846;gene29897;gene29931;gene30210;gene33533;gene35137;gene38912;gene39832;gene41891;gene42928;gene6860;gene790;gene8013;gene8742
Lipoic acid metabolism	ko00785	1	gene30010
beta-Alanine metabolism	ko00410	14	gene1218;gene14775;gene26237;gene26291;gene28277;gene29846;gene29897;gene31126;gene3850;gene41119;gene41891;gene42928;gene4390;gene9130
Carotenoid biosynthesis	ko00906	8	gene12409;gene13689;gene15615;gene16169;gene32003;gene34873;gene37943;gene42409
Porphyrin and chlorophyll metabolism	ko00860	6	gene20615;gene29838;gene32805;gene33507;gene38655;gene4814
Anthocyanin biosynthesis	ko00942	1	gene27096
Vitamin B6 metabolism	ko00750	1	gene27606
Riboflavin metabolism	ko00740	1	gene21619
RNA transport	ko03013	6	Walnut_newGene_1806;gene17311;gene21618;gene23507;gene2707;gene36951
Thiamine metabolism	ko00730	3	gene23793;gene34891;gene42017
Ether lipid metabolism	ko00565	8	gene10659;gene2363;gene25894;gene34638;gene35988;gene366;gene37924;gene38162
ABC transporters	ko02010	15	Walnut_newGene_6696;gene10894;gene13293;gene17270;gene17552;gene20743;gene2091;gene2202;gene28321;gene28322;gene30229;gene40995;gene4304;gene4307;gene8975
Butanoate metabolism	ko00650	3	gene14775;gene34643;gene3850
Ribosome biogenesis in eukaryotes	ko03008	6	Walnut_newGene_3649;Walnut_newGene_3969;Walnut_newGene_4273;gene138;gene21203;gene24773

## Sheet: RPvsNP
KEGG pathways and the corresponding gene numbers and IDs in the transcriptome in the peel of red and green walnut .
Pathway	ko_ID	DEG	Gene IDs
Carbon metabolism	ko01200	16	Walnut_newGene_6955;Walnut_newGene_7122;gene1086;gene10953;gene12383;gene1279;gene17242;gene26044;gene27394;gene28493;gene33448;gene35137;gene35203;gene5384;gene6863;gene8013
Biosynthesis of unsaturated fatty acids	ko01040	8	Walnut_newGene_6669;gene10339;gene12345;gene14671;gene1684;gene21395;gene38426;gene9324
Monoterpenoid biosynthesis	ko00902	4	Walnut_newGene_5139;gene12333;gene22402;gene42477
Citrate cycle (TCA cycle)	ko00020	2	gene27394;gene35203
Porphyrin and chlorophyll metabolism	ko00860	8	Walnut_newGene_4542;gene11728;gene20292;gene20615;gene29333;gene32015;gene32805;gene8779
Biosynthesis of amino acids	ko01230	20	Walnut_newGene_3560;Walnut_newGene_6955;gene10136;gene1086;gene1279;gene15225;gene17242;gene20387;gene20485;gene27394;gene28493;gene32605;gene35137;gene42683;gene4771;gene4896;gene5010;gene540;gene7399;gene8013
Pyrimidine metabolism	ko00240	9	Walnut_newGene_1918;Walnut_newGene_486;Walnut_newGene_5055;gene12063;gene1231;gene21871;gene22219;gene31381;gene36953
Purine metabolism	ko00230	12	Walnut_newGene_1918;Walnut_newGene_486;Walnut_newGene_5055;gene12063;gene18282;gene21871;gene23867;gene25347;gene27383;gene31381;gene36953;gene475
Fructose and mannose metabolism	ko00051	7	Walnut_newGene_2911;Walnut_newGene_7207;Walnut_newGene_7208;gene1279;gene26044;gene35052;gene35137
Fatty acid degradation	ko00071	11	Walnut_newGene_6669;gene11465;gene12345;gene13302;gene26831;gene27088;gene28277;gene29897;gene37356;gene6863;gene9324
Cyanoamino acid metabolism	ko00460	11	Walnut_newGene_1320;gene11350;gene17470;gene28493;gene30870;gene33424;gene41171;gene42091;gene4670;gene5748;gene7585
Ubiquitin mediated proteolysis	ko04120	10	gene106;gene12534;gene23034;gene3131;gene34420;gene3659;gene40607;gene41774;gene9657;gene9809
Glutathione metabolism	ko00480	12	Walnut_newGene_6518;gene15482;gene15483;gene15484;gene19216;gene21545;gene22937;gene27394;gene28949;gene31381;gene38599;gene7585
Diterpenoid biosynthesis	ko00904	9	gene11546;gene13807;gene15437;gene1938;gene25451;gene37351;gene37936;gene39530;gene39753
Stilbenoid, diarylheptanoid and gingerol biosynthesis	ko00945	3	gene11203;gene13783;gene21068
Alanine, aspartate and glutamate metabolism	ko00250	2	gene23295;gene32605
Basal transcription factors	ko03022	2	Walnut_newGene_4006;gene28387
Pyruvate metabolism	ko00620	5	gene10953;gene12383;gene28277;gene29897;gene35203
Sphingolipid metabolism	ko00600	1	gene7715
Phenylalanine metabolism	ko00360	21	gene10274;gene10275;gene11809;gene11958;gene13135;gene14657;gene20387;gene22625;gene2578;gene26291;gene26878;gene32615;gene32683;gene34962;gene35747;gene36561;gene37179;gene40311;gene42912;gene6048;gene8957
Base excision repair	ko03410	2	gene21411;gene35640
Glucosinolate biosynthesis	ko00966	2	gene17852;gene20839
Arginine and proline metabolism	ko00330	11	Walnut_newGene_3560;gene21508;gene28277;gene29897;gene31260;gene32605;gene33580;gene41119;gene42784;gene5054;gene9748
Anthocyanin biosynthesis	ko00942	1	gene27096
Isoquinoline alkaloid biosynthesis	ko00950	5	gene20387;gene2130;gene22625;gene26291;gene31821
Riboflavin metabolism	ko00740	2	gene10512;gene21619
Steroid biosynthesis	ko00100	4	gene1331;gene23228;gene24076;gene33128
beta-Alanine metabolism	ko00410	6	gene21508;gene22625;gene26291;gene28277;gene29897;gene41119
Terpenoid backbone biosynthesis	ko00900	7	gene10821;gene12743;gene20292;gene24234;gene38539;gene42017;gene9895
Histidine metabolism	ko00340	2	gene28277;gene29897
Starch and sucrose metabolism	ko00500	43	Walnut_newGene_1320;Walnut_newGene_5335;gene10264;gene11350;gene11480;gene1372;gene14536;gene15425;gene15804;gene15834;gene16577;gene17470;gene20592;gene21380;gene22639;gene22644;gene23790;gene2436;gene24739;gene26044;gene28266;gene28606;gene29100;gene30870;gene31659;gene32130;gene33424;gene35586;gene37199;gene37242;gene37482;gene37760;gene39177;gene41171;gene42082;gene42263;gene4670;gene5748;gen…
Cysteine and methionine metabolism	ko00270	8	Walnut_newGene_6955;gene23450;gene33580;gene37573;gene39286;gene4896;gene5010;gene9648
alpha-Linolenic acid metabolism	ko00592	14	Walnut_newGene_6669;gene10659;gene12345;gene1835;gene21372;gene24794;gene26354;gene28251;gene30329;gene31353;gene35072;gene5626;gene6316;gene9324
Spliceosome	ko03040	14	Walnut_newGene_5838;Walnut_newGene_6388;gene13781;gene21416;gene21847;gene22087;gene23251;gene24048;gene26246;gene26823;gene30701;gene35976;gene38061;gene42157
Ribosome biogenesis in eukaryotes	ko03008	4	gene138;gene20030;gene21416;gene23929
Peroxisome	ko04146	13	Walnut_newGene_6669;gene11465;gene12345;gene13302;gene16482;gene20068;gene26831;gene27088;gene27394;gene37356;gene39817;gene6493;gene9324
Photosynthesis - antenna proteins	ko00196	1	gene10071
Glycerolipid metabolism	ko00561	6	gene1610;gene26476;gene28277;gene29472;gene29897;gene38458
Tyrosine metabolism	ko00350	6	gene20387;gene2130;gene22625;gene26291;gene31821;gene6863
Degradation of aromatic compounds	ko01220	1	gene6863
Lysine degradation	ko00310	3	gene28277;gene29897;gene40694
Brassinosteroid biosynthesis	ko00905	6	gene11012;gene20645;gene32202;gene33552;gene40844;gene7651
Glycosaminoglycan degradation	ko00531	1	gene34924
Nitrogen metabolism	ko00910	4	gene24157;gene30124;gene32605;gene9665
Lysine biosynthesis	ko00300	1	gene5010
Fatty acid elongation	ko00062	5	gene13988;gene21395;gene27133;gene39346;gene39347
Protein export	ko03060	1	gene17350
Aminoacyl-tRNA biosynthesis	ko00970	7	Walnut_newGene_3550;Walnut_newGene_3789;Walnut_newGene_6408;Walnut_newGene_6409;gene22897;gene23285;gene4310
Sulfur relay system	ko04122	1	gene24115
Fatty acid metabolism	ko01212	14	Walnut_newGene_6669;gene10339;gene11465;gene12345;gene13302;gene14671;gene1684;gene21395;gene26831;gene27088;gene29871;gene37356;gene38426;gene9324
N-Glycan biosynthesis	ko00510	4	gene13415;gene20631;gene31817;gene39083
RNA polymerase	ko03020	4	Walnut_newGene_1918;Walnut_newGene_486;Walnut_newGene_5055;gene36953
Glycosylphosphatidylinositol(GPI)-anchor biosynthesis	ko00563	1	gene13999
Oxidative phosphorylation	ko00190	12	Walnut_newGene_1575;Walnut_newGene_346;Walnut_newGene_3873;gene1526;gene19831;gene21127;gene25907;gene27792;gene3711;gene469;gene6175;gene8773
Glycerophospholipid metabolism	ko00564	10	Walnut_newGene_5266;Walnut_newGene_7036;gene10659;gene14140;gene1610;gene1835;gene22947;gene26476;gene29472;gene38458
Cutin, suberine and wax biosynthesis	ko00073	6	gene11119;gene16946;gene23367;gene386;gene39381;gene40677
Thiamine metabolism	ko00730	3	gene18282;gene38539;gene42017
Carbon fixation in photosynthetic organisms	ko00710	6	gene1086;gene10953;gene12383;gene17242;gene35203;gene8013
Arachidonic acid metabolism	ko00590	3	gene10659;gene28949;gene7585
Fatty acid biosynthesis	ko00061	7	gene11465;gene13302;gene1684;gene26831;gene27088;gene29871;gene37356
Tropane, piperidine and pyridine alkaloid biosynthesis	ko00960	8	gene1924;gene20387;gene22625;gene26291;gene41699;gene41701;gene7014;gene9710
Sesquiterpenoid and triterpenoid biosynthesis	ko00909	4	gene24076;gene33128;gene3431;gene7703
ABC transporters	ko02010	1	gene28320
DNA replication	ko03030	4	gene10538;gene12063;gene30119;gene35640
Amino sugar and nucleotide sugar metabolism	ko00520	23	gene10173;gene10264;gene11480;gene1423;gene14536;gene15580;gene19040;gene21174;gene21380;gene22425;gene22639;gene23204;gene2411;gene2413;gene2424;gene2425;gene24739;gene26044;gene37440;gene42785;gene5928;gene7610;gene7611
Phenylalanine, tyrosine and tryptophan biosynthesis	ko00400	7	gene10136;gene15225;gene20387;gene42683;gene4771;gene540;gene7399
Taurine and hypotaurine metabolism	ko00430	1	gene7585
Linoleic acid metabolism	ko00591	4	gene10659;gene12653;gene5626;gene9134
Phagosome	ko04145	8	Walnut_newGene_165;gene13631;gene22461;gene28061;gene30228;gene40567;gene40933;gene9808
Glyoxylate and dicarboxylate metabolism	ko00630	3	gene28493;gene32605;gene6493
Glycolysis / Gluconeogenesis	ko00010	11	gene1279;gene26044;gene28277;gene298;gene29897;gene33900;gene35137;gene35203;gene38658;gene6863;gene8013
One carbon pool by folate	ko00670	4	Walnut_newGene_7361;gene28493;gene4114;gene5384
Galactose metabolism	ko00052	14	gene10414;gene1279;gene16219;gene26044;gene2892;gene31973;gene32069;gene32708;gene35137;gene35586;gene37347;gene37440;gene39097;gene5257
Ubiquinone and other terpenoid-quinone biosynthesis	ko00130	1	gene26465
Limonene and pinene degradation	ko00903	1	gene29897
Zeatin biosynthesis	ko00908	3	gene1206;gene3090;gene9174
Ascorbate and aldarate metabolism	ko00053	5	gene23071;gene28277;gene29897;gene31196;gene31197
Valine, leucine and isoleucine degradation	ko00280	3	gene28277;gene29897;gene9324
Mismatch repair	ko03430	3	gene10538;gene30119;gene35640
RNA transport	ko03013	10	Walnut_newGene_3903;gene19683;gene21106;gene21618;gene23507;gene24830;gene2707;gene39827;gene5672;gene5822
Pentose and glucuronate interconversions	ko00040	19	Walnut_newGene_7207;Walnut_newGene_7208;gene15089;gene15425;gene16577;gene20033;gene20592;gene21357;gene23790;gene28277;gene28622;gene29897;gene31030;gene34746;gene35052;gene36516;gene37242;gene37482;gene39177
Ribosome	ko03010	29	Walnut_newGene_1267;Walnut_newGene_2348;gene12315;gene13615;gene14535;gene15117;gene15809;gene17236;gene17363;gene17485;gene20091;gene20847;gene21944;gene22942;gene23579;gene24632;gene26239;gene27318;gene27324;gene30981;gene31107;gene33091;gene37615;gene4354;gene4394;gene5431;gene553;gene8173;gene8910
Pentose phosphate pathway	ko00030	6	Walnut_newGene_7122;gene1086;gene1279;gene17242;gene33448;gene35137
Plant hormone signal transduction	ko04075	57	Walnut_newGene_167;Walnut_newGene_186;Walnut_newGene_279;Walnut_newGene_6739;gene1007;gene10932;gene11662;gene13801;gene13929;gene14333;gene16401;gene17201;gene17429;gene17807;gene18320;gene20032;gene20297;gene22246;gene2254;gene22563;gene22968;gene23837;gene24188;gene24309;gene25078;gene2519;gene25471;gene26851;gene28702;gene28913;gene2958;gene30014;gene30895;gene31754;gene32727;gene32967;gene33…
Regulation of autophagy	ko04140	3	gene10134;gene10426;gene24015
Protein processing in endoplasmic reticulum	ko04141	46	Walnut_newGene_3782;Walnut_newGene_6388;Walnut_newGene_6769;gene13638;gene13781;gene17137;gene17256;gene18032;gene20631;gene20875;gene21951;gene22834;gene22915;gene22925;gene24391;gene26246;gene26309;gene28347;gene29255;gene29256;gene29257;gene29794;gene30701;gene31817;gene34484;gene34566;gene35976;gene36083;gene36699;gene38248;gene38250;gene40607;gene41657;gene41658;gene41659;gene41660;gene41662…
mRNA surveillance pathway	ko03015	3	gene25938;gene27168;gene3922
Nucleotide excision repair	ko03420	4	gene10538;gene28387;gene30119;gene35640
Glycine, serine and threonine metabolism	ko00260	9	gene15225;gene20485;gene22625;gene23295;gene26291;gene28493;gene5010;gene5384;gene7399
Carotenoid biosynthesis	ko00906	8	gene13689;gene18482;gene27650;gene28988;gene30784;gene3762;gene37943;gene7911
RNA degradation	ko03018	4	gene1279;gene31972;gene35137;gene38061
SNARE interactions in vesicular transport	ko04130	6	Walnut_newGene_2008;Walnut_newGene_271;gene13631;gene16096;gene29276;gene40567
Nicotinate and nicotinamide metabolism	ko00760	3	Walnut_newGene_121;gene21871;gene8875
Homologous recombination	ko03440	2	gene10538;gene30119
Sulfur metabolism	ko00920	7	Walnut_newGene_6955;gene10138;gene15238;gene18711;gene22723;gene23867;gene36375
Inositol phosphate metabolism	ko00562	8	gene10290;gene15070;gene23071;gene23974;gene2550;gene39757;gene42290;gene589
Plant-pathogen interaction	ko04626	49	Walnut_newGene_6904;gene10145;gene10850;gene11497;gene13638;gene14093;gene14596;gene14860;gene16084;gene17201;gene19862;gene20511;gene22563;gene2345;gene23496;gene24631;gene2606;gene26264;gene27703;gene29214;gene30309;gene30356;gene31727;gene320;gene32336;gene32437;gene32465;gene33005;gene33529;gene33721;gene34154;gene34734;gene35897;gene38698;gene38808;gene38959;gene38961;gene39874;gene40640;gen…
Phosphatidylinositol signaling system	ko04070	18	Walnut_newGene_5266;Walnut_newGene_7036;gene10145;gene10290;gene15070;gene1610;gene23974;gene2550;gene29472;gene30356;gene33721;gene38959;gene38961;gene39757;gene42290;gene589;gene6430;gene747
2-Oxocarboxylic acid metabolism	ko01210	5	Walnut_newGene_3560;gene17852;gene20839;gene27394;gene5010
Flavonoid biosynthesis	ko00941	6	gene11203;gene13783;gene21068;gene32601;gene4994;gene640
Photosynthesis	ko00195	4	gene29873;gene3711;gene39645;gene7201
Circadian rhythm - plant	ko04712	6	gene18543;gene2514;gene32450;gene32601;gene41774;gene4994
Tryptophan metabolism	ko00380	5	gene17852;gene20839;gene28277;gene29897;gene6493
Proteasome	ko03050	1	gene23600
Phenylpropanoid biosynthesis	ko00940	39	Walnut_newGene_1320;gene10274;gene10275;gene11203;gene11350;gene11809;gene11958;gene13135;gene13510;gene13783;gene14657;gene17470;gene21068;gene21627;gene22299;gene2578;gene25955;gene26878;gene30422;gene30870;gene32452;gene32615;gene32683;gene33424;gene34962;gene35747;gene35850;gene36561;gene37179;gene40311;gene41171;gene42763;gene42912;gene4670;gene5748;gene6048;gene7141;gene7143;gene8957
Biotin metabolism	ko00780	2	gene1684;gene29871
Ether lipid metabolism	ko00565	2	gene10659;gene22947
Endocytosis	ko04144	18	Walnut_newGene_431;Walnut_newGene_6388;gene10290;gene11529;gene1156;gene12087;gene13781;gene15776;gene22215;gene22461;gene22947;gene2550;gene26246;gene30701;gene30944;gene31635;gene35976;gene42157
